# Supplementary material for: A Comprehensive Review of the Impacts of Climate Change on Salmon: Strengths and Weaknesses of the Literature by Life Stage
Source: MDPI journal article supplement (doi:10.3390/fishes8060319), 2023-06-16
Supplement: s1 [file s1]

*Journal: Fishes, Special Issue: Effect of Climate Change on Salmonid Fishes in Rivers*

**Supplement S2:** *Complete list of literature used in the quantification of categories and the labels assigned to each citation*

**Supporting information for:**

*A comprehensive review of the impacts of climate change on salmon: strengths and weaknesses of the literature by life stage*

Lisa G. Crozier<sup>1</sup> and J. E. Siegel<sup>2</sup>

1. Northwest Fisheries Science Center, NOAA Fisheries
2. Ocean Associates, Inc. Under contract to NWFSC. Current address: PACE Engineers, Inc. 3501 Colby Ave Suite 101, Everett, WA 98201

**Key words:** anadromous fish; ecological responses to climate change; future projections; global change; ocean; freshwater

**Supplement S2 CONTENTS**

|                                                              |     |
|--------------------------------------------------------------|-----|
| Labels assigned to each citation included in the review..... | 2   |
| Literature Cited.....                                        | 161 |

| Citation number | Duration | Region        | Subregion                  | Type of study                                    | Species                                                  | Life stage                     | Driver                                                          | Response                                  | Driver Process                                  | Response Process       |
|-----------------|----------|---------------|----------------------------|--------------------------------------------------|----------------------------------------------------------|--------------------------------|-----------------------------------------------------------------|-------------------------------------------|-------------------------------------------------|------------------------|
| 1               | 6to10    | California    | California_S               | Field/<br>RemoteSensing,<br>Lab/<br>Experimental | O. mykiss                                                | Evolution                      | NA                                                              | Genetics_Adaptation                       |                                                 | Evolution              |
| 2               | NA       | Mountain_west | NA                         | Review/<br>MetaAnalysis                          | Other_fish                                               | General                        | Flow, Habitat, Temperature_<br>FW                               | Genetics_Adaptation, Habitat_Distribution | Environment,                                    | Dispersal, Evolution   |
| 3               | 10plus   | Largescale    | NA                         | Projections/<br>salmon                           | O. keta, O. kisutch, O. mykiss, O. nerka, O. tshawytscha | Marine                         | Temperature_<br>FW                                              | Habitat_Distribution                      | Environment,                                    | Dispersal              |
| 4               | 2to5     | Japan         | NA                         | Lab/<br>Experimental                             | O. keta                                                  | Upmigration                    | Temperature_<br>FW                                              | Physiology_Condition                      | Environment,                                    | Physiology             |
| 5               | 10plus   | California    | California_S               | Field/<br>RemoteSensing                          | Other_species                                            | Marine                         | Predators                                                       | Behaviour, Mortality                      | Species_interactions,                           | Dispersal, Demography  |
| 6               | 10plus   | Northwest     | Northwest_Columbia         | Field/<br>RemoteSensing                          | O. tshawytscha                                           | Juvenile, Marine, Outmigration | NA                                                              | Growth, Mortality, Phenology              |                                                 | Demography, Physiology |
| 7               | 2to5     | Northwest     | NA                         | Lab/<br>Experimental                             | O. tshawytscha                                           | Juvenile, Outmigration         | Ecosystem, Invasives, Prey                                      | NA                                        | Species_interactions,                           | NA                     |
| 8               | NA       | California    | California_CV              | Model                                            | O. tshawytscha                                           | Egg, Juvenile, Outmigration    | Management                                                      | NA                                        | , Management                                    | NA                     |
| 9               | 2to5     | Alaska        | Alaska_S                   | Field/<br>RemoteSensing                          | O. kisutch                                               | Egg                            | NA                                                              | Phenology, Population_resilience          |                                                 | Demography             |
| 10              | 10plus   | Northwest     | Northwest_Puget_Sound      | Field/<br>RemoteSensing                          | O. keta                                                  | Upmigration                    | Climate_indices, Flow, Predators                                | Phenology                                 | Species_interactions, Environment,              | Demography             |
| 11              | 1        | California    | California_CV              | Field/<br>RemoteSensing,<br>Lab/<br>Experimental | O. tshawytscha                                           | Outmigration                   | Dissolved_oxygen, Habitat, Management, Prey, Temperature_<br>FW | Growth                                    | Species_interactions, Environment, , Management | Physiology             |
| 12              | 10plus   | California    | California_N, California_S | Field/<br>RemoteSensing                          | Other_species                                            | Marine                         | Ecosystem, Predators                                            | NA                                        | Species_interactions,                           | NA                     |
| 13              | NA       | Largescale    | NA                         | Model, Projections/<br>ecosystem                 | General                                                  | Marine                         | Ecosystem                                                       | NA                                        | Species_interactions,                           | NA                     |

| Citation number | Duration | Region                                  | Subregion                   | Type of study                         | Species                  | Life stage                   | Driver                                    | Response                                  | Driver Process                     | Response Process      |
|-----------------|----------|-----------------------------------------|-----------------------------|---------------------------------------|--------------------------|------------------------------|-------------------------------------------|-------------------------------------------|------------------------------------|-----------------------|
| 14              | 10plus   | British_Columbia                        | British_Columbia_not_Fraser | Model, Theoretical/Opinion            | O. nerka                 | Marine, Population           | Flow                                      | Mortality, Productivity                   | Environment,                       | Demography            |
| 15              | 1        | British_Columbia                        | British_Columbia_not_Fraser | Lab/Experimental                      | O. tshawytscha           | Juvenile, Outmigration       | Dissolved_oxygen, Genetics                | Genetics_Adaptation                       | Evolution, Environment,            | Evolution             |
| 16              | 2to5     | British_Columbia                        | British_Columbia_Fraser     | Field/RemoteSensing                   | O. nerka                 | Juvenile                     | Disease, Dissolved_oxygen, Temperature_FW | Behaviour, Mortality                      | Species_interactions, Environment, | Dispersal, Demography |
| 17              | NA       | British_Columbia                        | British_Columbia_not_Fraser | Lab/Experimental, Theoretical/Opinion | O. nerka, O. tshawytscha | General                      | Temperature_FW                            | Genetics_Adaptation, Physiology_Condition | Environment,                       | Evolution, Physiology |
| 18              | 6to10    | Northwest                               | Northwest_Columbia          | Field/RemoteSensing                   | General                  | Freshwater_habitat           | Habitat                                   | Habitat_Distribution                      | Environment,                       | Dispersal             |
| 19              | 10plus   | Mountain_west                           | NA                          | Projections/salmon                    | O. clarkii               | Freshwater_habitat, Juvenile | Invasives, Temperature_FW                 | NA                                        | Species_interactions, Environment, | NA                    |
| 20              | 2to5     | Northwest                               | Northwest_Columbia          | Field/RemoteSensing                   | O. clarkii               | Population                   | Flow, Habitat, Invasives, Temperature_FW  | Growth, Habitat_Distribution              | Species_interactions, Environment, | Dispersal, Physiology |
| 21              | NA       | British_Columbia, Largescale, Northwest | NA                          | Model, Projections/ecosystem          | General, O. tshawytscha  | Marine                       | Contaminants, Ecosystem, Predators        | Physiology_Condition                      | Species_interactions, Environment, | Physiology            |
| 22              | NA       | Largescale                              | NA                          | Model, Projections/ecosystem          | Other_species            | General                      | Ecosystem, Predators, Temperature_marine  | Population_resilience                     | Species_interactions, Environment, | Demography            |
| 23              | 1        | Mountain_west                           | NA                          | Field/RemoteSensing                   | Salmonid_general         | Evolution, Juvenile          | Disease                                   | NA                                        | Species_interactions,              | NA                    |
| 24              | 1        | California                              | California_N                | Field/RemoteSensing                   | Salmonid_general         | Upmigration                  | Disease                                   | NA                                        | Species_interactions,              | NA                    |
| 25              | NA       | NA                                      | NA                          | Review/MetaAnalysis                   | General                  | General                      | Temperature_FW                            | Physiology_Condition                      | Environment,                       | Physiology            |

| Citation number | Duration | Region                        | Subregion             | Type of study                                      | Species                                  | Life stage                 | Driver                                               | Response                                   | Driver Process                        | Response Process         |
|-----------------|----------|-------------------------------|-----------------------|----------------------------------------------------|------------------------------------------|----------------------------|------------------------------------------------------|--------------------------------------------|---------------------------------------|--------------------------|
| 26              | 1        | Europe                        | NA                    | Field/<br>RemoteSensing                            | S. salar, S. trutta                      | Upmigration                | Contaminants,<br>Methods                             | Behaviour                                  | Environment,                          | Dispersal                |
| 27              | 10plus   | East_North_America,<br>Europe | NA                    | Field/<br>RemoteSensing                            | S. salar                                 | Egg, Marine,<br>Population | Ecosystem,<br>Temperature_<br>marine                 | Productivity                               | Species_interactions,<br>Environment, | Demography               |
| 28              | 10plus   | Europe                        | NA                    | Field/<br>RemoteSensing,<br>Projections/<br>salmon | S. trutta                                | Population                 | Temperature_<br>FW                                   | Population_resilience,<br>Productivity     | Environment,                          | Demography               |
| 29              | 2to5     | Europe                        | NA                    | Field/<br>RemoteSensing                            | S. salar                                 | Population                 | Management                                           | Genetics_Adaptation                        | , Management                          | Evolution                |
| 30              | 10plus   | Europe                        | NA                    | Field/<br>RemoteSensing                            | S. salar                                 | Marine                     | Environment,<br>Fisheries,<br>Temperature_<br>marine | Habitat_Distribution                       | Environment, ,<br>Management          | Dispersal                |
| 31              | 1        | Northwest                     | Northwest_Columbia    | Field/<br>RemoteSensing                            | O. tshawytscha                           | Upmigration                | Flow, Habitat,<br>Temperature_<br>FW                 | Genetics_Adaptation                        | Environment,                          | Evolution                |
| 32              | NA       | Asia_other                    | NA                    | Lab/<br>Experimental                               | O. keta, O. kisutch, O. masou, O. mykiss | General                    | Genetics,<br>Methods                                 | NA                                         | Evolution,                            | NA                       |
| 33              | NA       | Mountain_west                 | NA                    | Field/<br>RemoteSensing,<br>Lab/<br>Experimental   | O. clarkii                               | Evolution                  | Temperature_<br>FW                                   | Genetics_Adaptation                        | Environment,                          | Evolution                |
| 34              | NA       | NA                            | NA                    | Theoretical/<br>Opinion                            | General                                  | Evolution                  | NA                                                   | Productivity                               |                                       | Demography               |
| 35              | 10plus   | Northwest                     | Northwest_Columbia    | Field/<br>RemoteSensing                            | O. keta                                  | Marine                     | Climate_indices,<br>Density_Food,<br>Prey            | Growth                                     | Species_interactions,<br>Environment, | Physiology               |
| 36              | 1        | Northwest                     | Northwest_Columbia    | Field/<br>RemoteSensing                            | O. mykiss                                | Juvenile                   | Density_Food,<br>Temperature_<br>FW                  | Behaviour, Growth,<br>Habitat_Distribution | Species_interactions,<br>Environment, | Dispersal,<br>Physiology |
| 37              | 10plus   | Northwest                     | Northwest_Puget_Sound | Field/<br>RemoteSensing                            | O. tshawytscha                           | Juvenile                   | Habitat                                              | Life_history,<br>Productivity              | Environment,                          | Demography               |

| Citation number | Duration | Region                   | Subregion                                                                              | Type of study                  | Species                       | Life stage                                 | Driver                                      | Response                                         | Driver Process                        | Response Process         |
|-----------------|----------|--------------------------|----------------------------------------------------------------------------------------|--------------------------------|-------------------------------|--------------------------------------------|---------------------------------------------|--------------------------------------------------|---------------------------------------|--------------------------|
| 38              | NA       | NA                       | NA                                                                                     | Model, Review/<br>MetaAnalysis | General                       | Marine                                     | Ecosystem                                   | Phenology,<br>Productivity                       | Species_interactions,                 | Demography               |
| 39              | 1        | NA                       | NA                                                                                     | Lab/<br>Experimental           | S. salar                      | Juvenile                                   | Temperature_<br>FW                          | Physiology_Condition                             | Environment,                          | Physiology               |
| 40              | NA       | NA                       | NA                                                                                     | Model                          | Salmonid_<br>general          | Population                                 | Management,<br>Temperature_<br>FW           | Population_resilience,<br>Productivity           | Environment, ,<br>Management          | Demography               |
| 41              | NA       | Australia_New<br>Zealand | NA                                                                                     | Model                          | General                       | Egg, Juvenile,<br>Spawning                 | Habitat,<br>Management,<br>Restoration      | NA                                               | Environment, ,<br>Management          | NA                       |
| 42              | 2to5     | British_Colum<br>bia     | British_Columb<br>ia_Fraser                                                            | Lab/<br>Experimental           | O. nerka                      | Evolution,<br>Outmigration,<br>Upmigration | Temperature_<br>FW                          | Physiology_Condition                             | Environment,                          | Physiology               |
| 43              | 1        | British_Colum<br>bia     | British_Columb<br>ia_Fraser                                                            | Lab/<br>Experimental           | O. nerka                      | Upmigration                                | Temperature_<br>FW                          | Genetics_Adaptation,<br>Physiology_Condition     | Environment,                          | Evolution,<br>Physiology |
| 44              | 1        | British_Colum<br>bia     | NA                                                                                     | Lab/<br>Experimental           | S. salar                      | Evolution,<br>Juvenile,<br>Upmigration     | Dissolved_oxyg<br>en,<br>Temperature_<br>FW | Physiology_Condition                             | Environment,                          | Physiology               |
| 45              | 1        | British_Colum<br>bia     | British_Columb<br>ia_not_Fraser                                                        | Lab/<br>Experimental           | O. kisutch, O.<br>mykiss      | Juvenile                                   | Temperature_<br>FW                          | Physiology_Condition                             | Environment,                          | Physiology               |
| 46              | 1        | British_Colum<br>bia     | British_Columb<br>ia_not_Fraser                                                        | Lab/<br>Experimental           | S. salar                      | Juvenile                                   | Dissolved_oxyg<br>en,<br>Temperature_<br>FW | Physiology_Condition                             | Environment,                          | Physiology               |
| 47              | 10plus   | California,<br>Northwest | California_CV,<br>California_N,<br>Northwest_Co<br>astal,<br>Northwest_Pu<br>get_Sound | Field/<br>RemoteSensing        | O. tshawytscha                | Outmigration                               | Density_Food,<br>Flow, Habitat              | Behaviour,<br>Habitat_Distribution,<br>Phenology | Species_interactions,<br>Environment, | Dispersal,<br>Demography |
| 48              | 2to5     | South_Americ<br>a        | NA                                                                                     | Lab/<br>Experimental           | O. kisutch                    | Spawning                                   | Genetics                                    | Genetics_Adaptation                              | Evolution,                            | Evolution                |
| 49              | 6to10    | British_Colum<br>bia     | British_Columb<br>ia_not_Fraser                                                        | Field/<br>RemoteSensing        | O. kisutch, O.<br>tshawytscha | General                                    | Flow, Genetics                              | Behaviour                                        | Evolution,<br>Environment,            | Dispersal                |

| Citation number | Duration | Region                   | Subregion                               | Type of study                                    | Species                 | Life stage                                | Driver                                       | Response                             | Driver Process                        | Response Process                     |
|-----------------|----------|--------------------------|-----------------------------------------|--------------------------------------------------|-------------------------|-------------------------------------------|----------------------------------------------|--------------------------------------|---------------------------------------|--------------------------------------|
| 50              | 2to5     | Europe                   | NA                                      | Lab/<br>Experimental                             | S. trutta               | Juvenile,<br>Outmigration,<br>Upmigration | Density_Food                                 | Life_history, Phenology              | Species_interactions,                 | Demography                           |
| 51              | 1        | Europe                   | NA                                      | Lab/<br>Experimental                             | S. trutta               | Juvenile                                  | Density_Food,<br>Temperature_<br>FW          | Phenology                            | Species_interactions,<br>Environment, | Demography                           |
| 52              | 2to5     | Europe                   | NA                                      | Lab/<br>Experimental                             | S. trutta               | Juvenile,<br>Outmigration                 | Density_Food,<br>Genetics                    | Physiology_Condition                 | Species_interactions,<br>Evolution*,  | Physiology                           |
| 53              | NA       | California,<br>Northwest | California_N,<br>Northwest_Co<br>astal  | Lab/<br>Experimental                             | O. mykiss               | Evolution                                 | Genetics                                     | Genetics_Adaptation,<br>Life_history | Evolution,                            | Demography,<br>Evolution             |
| 54              | 10plus   | Europe                   | NA                                      | Field/<br>RemoteSensing                          | S. salar                | Outmigration,<br>Upmigration              | Flow,<br>Temperature_<br>FW                  | Genetics_Adaptation                  | Environment,                          | Evolution*                           |
| 55              | 1        | Europe                   | NA                                      | Lab/<br>Experimental                             | S. trutta               | Juvenile                                  | Density_Food,<br>Temperature_<br>FW          | Growth,<br>Physiology_Condition      | Species_interactions,<br>Environment, | Physiology                           |
| 56              | NA       | California,<br>Northwest | California_N,<br>Northwest_Col<br>umbia | Field/<br>RemoteSensing                          | S. confluentus          | Juvenile                                  | Temperature_<br>FW                           | Growth                               | Environment,                          | Physiology                           |
| 57              | NA       | Alaska                   | Alaska_W                                | Model                                            | O. nerka                | Spawning,<br>Upmigration                  | Environment,<br>Predators                    | Habitat_Distribution,<br>Mortality   | Species_interactions,<br>Environment, | Dispersal,<br>Demography             |
| 58              | 2to5     | Alaska                   | Alaska_W                                | Field/<br>RemoteSensing,<br>Lab/<br>Experimental | O. kisutch, O.<br>nerka | Juvenile,<br>Spawning                     | Density_Food,<br>Prey,<br>Temperature_<br>FW | Diet, Growth                         | Species_interactions,<br>Environment, | Species_interactio<br>ns, Physiology |
| 59              | NA       | Europe                   | NA                                      | Model                                            | S. salar                | Juvenile                                  | Density_Food,<br>Prey                        | Growth,<br>Physiology_Condition      | Species_interactions,                 | Physiology                           |
| 60              | 10plus   | Europe                   | NA                                      | Field/<br>RemoteSensing                          | S. salar                | Juvenile,<br>Marine                       | NA                                           | Growth, Mortality,<br>Phenology      |                                       | Demography,<br>Physiology            |
| 61              | 10plus   | California               | California_S                            | Field/<br>RemoteSensing,<br>Model                | O. mykiss               | Outmigration                              | Flow, Habitat,<br>Management                 | Growth, Phenology                    | Environment, ,<br>Management          | Demography,<br>Physiology            |
| 62              | 6to10    | Northwest                | Northwest_Col<br>umbia                  | Field/<br>RemoteSensing                          | O. tshawytscha          | Egg, Juvenile                             | Climate_indice<br>s, Flow                    | Mortality, Productivity              | Environment,                          | Demography                           |
| 63              | 1        | Europe                   | NA                                      | Lab/<br>Experimental                             | S. salar                | Juvenile                                  | Temperature_<br>FW                           | Physiology_Condition                 | Environment,                          | Physiology                           |
| 64              | 1        | Europe                   | NA                                      | Lab/<br>Experimental                             | S. salar                | Juvenile                                  | Genetics                                     | Performance,<br>Physiology_Condition | Evolution,                            | Physiology                           |

| Citation number | Duration | Region                   | Subregion                   | Type of study                           | Species        | Life stage              | Driver                                | Response                                        | Driver Process                     | Response Process       |
|-----------------|----------|--------------------------|-----------------------------|-----------------------------------------|----------------|-------------------------|---------------------------------------|-------------------------------------------------|------------------------------------|------------------------|
| 65              | 10plus   | Largescale               | NA                          | Model                                   | O. mykiss      | Marine                  | Density_Food, Temperature_FW          | Growth                                          | Species_interactions, Environment, | Physiology             |
| 66              | 6to10    | Largescale               | NA                          | Field/ RemoteSensing                    | O. mykiss      | Marine                  | Prey                                  | Diet                                            | Species_interactions,              | Species_interactions   |
| 67              | 2to5     | British_Columbia         | British_Columbia_not_Fraser | Field/ RemoteSensing                    | O. nerka       | Upmigration             | Flow, Temperature_FW                  | Mortality, Phenology                            | Environment,                       | Demography             |
| 68              | NA       | Largescale               | NA                          | Theoretical/ Opinion                    | Other_species  | Marine                  | Ecosystem                             | NA                                              | Species_interactions,              | NA                     |
| 69              | NA       | NA                       | NA                          | Review/ MetaAnalysis                    | General        | Evolution               | Fisheries, Genetics                   | Genetics_Adaptation                             | Evolution, , Management            | Evolution              |
| 70              | 2to5     | British_Columbia, Europe | British_Columbia_not_Fraser | Field/ RemoteSensing, Lab/ Experimental | S. salar       | Juvenile                | Density_Food, Habitat                 | Habitat_Distribution, Physiology_Condition      | Species_interactions, Environment, | Dispersal, Physiology  |
| 71              | 2to5     | Europe                   | NA                          | Field/ RemoteSensing                    | S. salar       | General                 | Management                            | Mortality, Physiology_Condition                 | , Management                       | Demography, Physiology |
| 72              | 6to10    | Northwest                | Northwest_Puget_Sound       | Field/ RemoteSensing                    | S. confluentus | Egg, Juvenile, Spawning | Temperature_FW                        | Phenology                                       | Environment,                       | Demography             |
| 73              | 10plus   | Northwest                | Northwest_Puget_Sound       | Field/ RemoteSensing                    | O. tshawytscha | Spawning                | Management, Temperature_FW            | Genetics_Adaptation                             | Environment, , Management          | Evolution              |
| 74              | 10plus   | Largescale               | NA                          | Model                                   | O. gorbuscha   | Marine                  | Ecosystem, Environment, Prey          | Growth                                          | Species_interactions, Environment, | Physiology             |
| 75              | NA       | Europe                   | NA                          | Model, Projections/ salmon              | S. salar       | Population, Upmigration | Fisheries, Flow, Temperature_FW       | Genetics_Adaptation, Life_history, Productivity | Environment, , Management          | Demography, Evolution  |
| 76              | 10plus   | Europe                   | NA                          | Field/ RemoteSensing                    | S. trutta      | Evolution               | Density_Food, Habitat, Temperature_FW | Productivity                                    | Species_interactions, Environment, | Demography             |
| 77              | 2to5     | East_North_America       | NA                          | Field/ RemoteSensing                    | S. salar       | Spawning                | Flow                                  | Behaviour, Mortality                            | Environment,                       | Dispersal, Demography  |

| Citation number | Duration | Region             | Subregion                   | Type of study                            | Species                 | Life stage             | Driver                                                      | Response                                               | Driver Process                                  | Response Process                  |
|-----------------|----------|--------------------|-----------------------------|------------------------------------------|-------------------------|------------------------|-------------------------------------------------------------|--------------------------------------------------------|-------------------------------------------------|-----------------------------------|
| 78              | 2to5     | East_North_America | NA                          | Field/RemoteSensing                      | S. salar                | Upmigration            | Habitat, Management, Temperature_FW                         | Behaviour, Mortality                                   | Environment, , Management                       | Dispersal, Demography             |
| 79              | NA       | California         | California_N                | Model, Projections/ecosystem             | Other_species           | General                | Environment, Flow, Habitat, Predators                       | NA                                                     | Species_interactions, Environment,              | NA                                |
| 80              | 2to5     | Europe             | NA                          | Field/RemoteSensing, Model               | S. trutta               | Population             | Flow, Habitat, Temperature_FW                               | Growth, Habitat_Distribution, Maturation, Productivity | Environment,                                    | Dispersal, Demography, Physiology |
| 81              | 10plus   | British_Columbia   | British_Columbia_not_Fraser | Field/RemoteSensing                      | O. gorbuscha, O. mykiss | Juvenile, Outmigration | Density_Food, Environment, Flow, Management, Temperature_FW | Growth, Life_history, Phenology                        | Species_interactions, Environment, , Management | Demography, Physiology            |
| 82              | 1        | Europe             | NA                          | Lab/Experimental                         | O. mykiss               | Juvenile, Upmigration  | Disease                                                     | Physiology_Condition                                   | Species_interactions,                           | Physiology                        |
| 83              | 1        | Europe             | NA                          | Lab/Experimental                         | O. mykiss               | Juvenile, Upmigration  | Disease                                                     | Physiology_Condition                                   | Species_interactions,                           | Physiology                        |
| 84              | 1        | Europe             | NA                          | Lab/Experimental                         | O. mykiss               | Juvenile               | Disease                                                     | Immune, Mortality                                      | Species_interactions,                           | Demography, Physiology            |
| 85              | 1        | Europe             | NA                          | Lab/Experimental                         | O. mykiss               | Juvenile, Upmigration  | Disease                                                     | Physiology_Condition                                   | Species_interactions,                           | Physiology                        |
| 86              | NA       | Mountain_west      | NA                          | Model                                    | Other_fish              | Freshwater_habitat     | Management, Methods, Restoration                            | NA                                                     | , Management                                    | NA                                |
| 87              | 2to5     | Europe             | NA                          | Field/RemoteSensing                      | S. trutta               | Spawning, Upmigration  | Flow, Management                                            | Behaviour, Phenology                                   | Environment, , Management                       | Dispersal, Demography             |
| 88              | NA       | Northwest          | Northwest_Puget_Sound       | Field/RemoteSensing                      | General                 | Spawning               | Habitat, Restoration                                        | NA                                                     | Environment, , Management                       | NA                                |
| 89              | NA       | Europe             | NA                          | Review/MetaAnalysis, Theoretical/Opinion | S. salar                | Population             | Flow, Management                                            | Population_resilience                                  | Environment, , Management                       | Demography                        |
| 90              | NA       | NA                 | NA                          | Theoretical/Opinion                      | General                 | Marine                 | Climate_indices, Environment                                | NA                                                     | Environment,                                    | NA                                |



| Citation number | Duration | Region                | Subregion                                     | Type of study                                             | Species                                | Life stage             | Driver                                 | Response                           | Driver Process                     | Response Process       |
|-----------------|----------|-----------------------|-----------------------------------------------|-----------------------------------------------------------|----------------------------------------|------------------------|----------------------------------------|------------------------------------|------------------------------------|------------------------|
| 91              | NA       | California, Northwest | California_N, California_S, Northwest_Coastal | Review/<br>MetaAnalysis                                   | General                                | Marine                 | Climate_indices, Ecosystem             | NA                                 | Species_interactions, Environment, | NA                     |
| 92              | 10plus   | Europe                | NA                                            | Field/<br>RemoteSensing                                   | S. salar                               | Juvenile               | Density_Food, Temperature_FW           | Growth                             | Species_interactions, Environment, | Physiology             |
| 93              | 1        | British_Columbia      | British_Columbia_Fraser                       | Lab/<br>Experimental                                      | O. gorbuscha, O. nerka, O. tshawytscha | Juvenile, Spawning     | Temperature_FW                         | Performance, Physiology_Condition  | Environment,                       | Physiology             |
| 94              | 1        | East_North_America    | NA                                            | Lab/<br>Experimental                                      | O. mykiss                              | Juvenile               | Temperature_FW                         | Performance, Physiology_Condition  | Environment,                       | Physiology             |
| 95              | NA       | California            | California_S                                  | Model, Projections/<br>ecosystem, Review/<br>MetaAnalysis | General                                | Marine                 | Ecosystem, Habitat, Temperature_marine | NA                                 | Species_interactions, Environment, | NA                     |
| 96              | 10plus   | Northwest             | Northwest_Puget_Sound                         | Field/<br>RemoteSensing                                   | O. nerka                               | Spawning               | Disease, Temperature_FW                | Mortality                          | Species_interactions, Environment, | Demography             |
| 97              | NA       | California, Northwest | California_N, California_S, Northwest_Coastal | Model                                                     | General                                | Marine                 | Ecosystem, Methods                     | Habitat_Distribution               | Species_interactions,              | Dispersal              |
| 98              | NA       | Europe                | NA                                            | Model                                                     | S. salar                               | Juvenile               | Flow, Management                       | Habitat_Distribution               | Environment, , Management          | Dispersal              |
| 99              | 2to5     | Europe                | NA                                            | Field/<br>RemoteSensing                                   | Other_fish, S. trutta                  | Juvenile               | Flow, Temperature_FW                   | Productivity                       | Environment,                       | Demography             |
| 100             | 2to5     | British_Columbia      | British_Columbia_Fraser                       | Field/<br>RemoteSensing                                   | O. nerka                               | Upmigration            | Fisheries                              | Mortality                          | , Management                       | Demography             |
| 101             | 2to5     | British_Columbia      | British_Columbia_Fraser                       | Field/<br>RemoteSensing                                   | O. nerka                               | Upmigration            | Fisheries                              | Mortality                          | , Management                       | Demography             |
| 102             | 2to5     | British_Columbia      | British_Columbia_Fraser                       | Field/<br>RemoteSensing                                   | O. nerka                               | Juvenile, Outmigration | Habitat                                | Life_history, Physiology_Condition | Environment,                       | Demography, Physiology |
| 103             | 10plus   | Northwest             | Northwest_Coastal                             | Field/<br>RemoteSensing                                   | O. clarkii                             | Juvenile               | Habitat, Management, Temperature_FW    | Habitat_Distribution               | Environment, , Management          | Dispersal              |

| Citation number | Duration | Region                 | Subregion             | Type of study                         | Species                   | Life stage             | Driver                                  | Response                           | Driver Process                     | Response Process       |
|-----------------|----------|------------------------|-----------------------|---------------------------------------|---------------------------|------------------------|-----------------------------------------|------------------------------------|------------------------------------|------------------------|
| 104             | NA       | Northwest              | Northwest_Puget_Sound | Projections/salmon                    | O. tshawytscha            | Population             | Habitat, Restoration                    | NA                                 | Environment, , Management          | NA                     |
| 105             | NA       | Asia_other             | NA                    | Model, Projections/salmon             | Other_fish                | Population             | Habitat, Management                     | Habitat_Distribution, Productivity | Environment, , Management          | Dispersal, Demography  |
| 106             | 2to5     | California             | California_S          | Field/RemoteSensing                   | General, Salmonid_general | Juvenile               | Habitat, Temperature_FW                 | NA                                 | Environment,                       | NA                     |
| 107             | 2to5     | California             | California_CV         | Lab/Experimental                      | O. mykiss                 | Juvenile, Outmigration | NA                                      | Growth, Phenology                  |                                    | Demography, Physiology |
| 108             | NA       | NA                     | NA                    | Review/MetaAnalysis                   | Salmonid_general          | Marine                 | Management                              | NA                                 | , Management                       | NA                     |
| 109             | NA       | Largescale             | NA                    | Review/MetaAnalysis                   | Salmonid_general          | Marine                 | Management                              | NA                                 | , Management                       | NA                     |
| 110             | NA       | Largescale             | NA                    | Review/MetaAnalysis                   | Salmonid_general          | Marine                 | Climate_indices, Ecosystem, Environment | Mortality, Productivity            | Species_interactions, Environment, | Demography             |
| 111             | NA       | NA                     | NA                    | Model                                 | Salmonid_general          | Juvenile               | Density_Food, Flow, Temperature_FW      | Growth                             | Species_interactions, Environment, | Physiology             |
| 112             | 10plus   | Europe                 | NA                    | Field/RemoteSensing                   | S. salar                  | Marine                 | Ecosystem, Temperature_marine           | Growth, Mortality, Productivity    | Species_interactions, Environment, | Demography, Physiology |
| 113             | 1        | East_North_America     | NA                    | Field/RemoteSensing, Model            | S. salar                  | Juvenile               | Habitat, Methods, Temperature_FW        | NA                                 | Environment,                       | NA                     |
| 114             | 2to5     | Northwest              | Northwest_Columbia    | Lab/Experimental                      | O. tshawytscha            | Outmigration           | NA                                      | Growth, Life_history, Phenology    |                                    | Demography, Physiology |
| 115             | 1        | California             | California_S          | Field/RemoteSensing                   | Other_species             | Marine                 | Acidity                                 | NA                                 | Environment,                       | NA                     |
| 116             | 1        | Antarctica, California | California_S          | Field/RemoteSensing, Lab/Experimental | Other_species             | Marine                 | Acidity                                 | NA                                 | Environment,                       | NA                     |

| Citation number | Duration | Region                | Subregion                                        | Type of study                                      | Species                                        | Life stage                                                   | Driver                            | Response                        | Driver Process                     | Response Process       |
|-----------------|----------|-----------------------|--------------------------------------------------|----------------------------------------------------|------------------------------------------------|--------------------------------------------------------------|-----------------------------------|---------------------------------|------------------------------------|------------------------|
| 117             | NA       | Northwest             | Northwest_Puget_Sound                            | Model, Projections/ecosystem, Projections/physical | Other_species                                  | Marine                                                       | Acidity, Ecosystem                | Physiology_Condition            | Species_interactions, Environment, | Physiology             |
| 118             | 2to5     | Northwest             | Northwest_Puget_Sound                            | Field/RemoteSensing                                | Other_species                                  | Marine                                                       | Acidity, Ecosystem                | NA                              | Species_interactions, Environment, | NA                     |
| 119             | NA       | Northwest             | Northwest_Columbia                               | Model                                              | O. kisutch                                     | Juvenile                                                     | Flow, Management                  | Mortality, Productivity         | Environment, , Management          | Demography             |
| 120             | NA       | Northwest             | Northwest_Coastal                                | Model                                              | O. keta                                        | Population                                                   | Flow, Habitat, Temperature_FW     | Life_history, Productivity      | Environment,                       | Demography             |
| 121             | NA       | Northwest             | Northwest_Coastal                                | Model                                              | O. keta, O. kisutch, O. mykiss, O. tshawytscha | Freshwater_habitat                                           | Habitat, Restoration              | Productivity                    | Environment, , Management          | Demography             |
| 122             | NA       | NA                    | NA                                               | Review/MetaAnalysis                                | Salmonid_general                               | Spawning                                                     | Habitat                           | Behaviour                       | Environment,                       | Dispersal              |
| 123             | NA       | Northwest             | Northwest_Columbia                               | Model                                              | General                                        | Freshwater_habitat, Juvenile                                 | Habitat, Restoration              | Habitat_Distribution            | Environment, , Management          | Dispersal              |
| 124             | NA       | Northwest             | NA                                               | Model, Projections/salmon                          | Salmonid_general                               | Egg, Freshwater_habitat, Juvenile, Outmigration, Upmigration | Flow, Restoration, Temperature_FW | NA                              | Environment, , Management          | NA                     |
| 125             | NA       | Northwest             | Northwest_Puget_Sound                            | Field/RemoteSensing, Model                         | O. tshawytscha                                 | Egg                                                          | Temperature_FW                    | Phenology, Physiology_Condition | Environment,                       | Demography, Physiology |
| 126             | NA       | Northwest             | Northwest_Columbia                               | Model                                              | O. mykiss, O. tshawytscha                      | Juvenile                                                     | Density_Food, Temperature_FW      | Growth                          | Species_interactions, Environment, | Physiology             |
| 127             | NA       | California, Northwest | California_Northwest_Coastal, Northwest_Columbia | Model, Projections/salmon                          | O. mykiss, O. tshawytscha                      | Juvenile, Spawning                                           | Density_Food, Temperature_FW      | Growth, Life_history            | Species_interactions, Environment, | Demography, Physiology |

| Citation number | Duration | Region     | Subregion          | Type of study                     | Species                                      | Life stage                                | Driver                                     | Response                                           | Driver Process                        | Response Process         |
|-----------------|----------|------------|--------------------|-----------------------------------|----------------------------------------------|-------------------------------------------|--------------------------------------------|----------------------------------------------------|---------------------------------------|--------------------------|
| 128             | NA       | NA         | NA                 | Theoretical/<br>Opinion           | General                                      | Evolution                                 | Genetics,<br>Management                    | Productivity                                       | Evolution, ,<br>Management            | Demography               |
| 129             | 10plus   | Alaska     | Alaska_SE          | Field/<br>RemoteSensing           | O. gorbuscha, O. kisutch, O. nerka, S. malma | Juvenile,<br>Outmigration,<br>Upmigration | Predators,<br>Temperature_<br>FW           | Mortality, Phenology                               | Species_interactions,<br>Environment, | Demography               |
| 130             | NA       | NA         | NA                 | Theoretical/<br>Opinion           | General                                      | Population                                | NA                                         | Genetics_Adaptation                                |                                       | Evolution                |
| 131             | 6to10    | California | California_S       | Field/<br>RemoteSensing           | O. mykiss                                    | Juvenile                                  | Temperature_<br>FW                         | Growth                                             | Environment,                          | Physiology               |
| 132             | NA       | Northwest  | Northwest_Columbia | Field/<br>RemoteSensing,<br>Model | O. tshawytscha                               | Freshwater_habitat, Spawning              | Flow, Habitat,<br>Management               | NA                                                 | Environment, ,<br>Management          | NA                       |
| 133             | 1        | Northwest  | Northwest_Columbia | Lab/<br>Experimental              | O. tshawytscha                               | Juvenile                                  | Temperature_<br>FW                         | Behaviour, Mortality                               | Environment,                          | Dispersal,<br>Demography |
| 134             | 2to5     | Northwest  | Northwest_Columbia | Field/<br>RemoteSensing           | Salmonid_general                             | Juvenile                                  | Habitat                                    | Population_resilience                              | Environment,                          | Demography               |
| 135             | NA       | Northwest  | Northwest_Columbia | Model                             | Salmonid_general                             | Juvenile                                  | Habitat,<br>Management,<br>Methods         | Population_resilience,<br>Productivity             | Environment, ,<br>Management          | Demography               |
| 136             | NA       | NA         | NA                 | Review/<br>MetaAnalysis           | General                                      | Juvenile                                  | Density_Food                               | NA                                                 | Species_interactions,                 | NA                       |
| 137             | 2to5     | Northwest  | Northwest_Columbia | Field/<br>RemoteSensing           | O. tshawytscha                               | Spawning,<br>Upmigration                  | Disease,<br>Temperature_<br>FW             | Mortality                                          | Species_interactions,<br>Environment, | Demography               |
| 138             | 6to10    | Europe     | NA                 | Lab/<br>Experimental              | S. salar, S. trutta                          | Upmigration                               | Flow                                       | Behaviour,<br>Physiology_Condition                 | Environment,                          | Dispersal,<br>Physiology |
| 139             | NA       | Northwest  | Northwest_Columbia | Model                             | S. confluentus                               | Spawning,<br>Upmigration                  | Habitat,<br>Temperature_<br>FW             | Behaviour,<br>Performance,<br>Physiology_Condition | Environment,                          | Dispersal,<br>Physiology |
| 140             | NA       | Northwest  | Northwest_Columbia | Model                             | O. mykiss                                    | Juvenile,<br>Outmigration                 | Density_Food,<br>Temperature_<br>FW        | Life_history,<br>Population_resilience             | Species_interactions,<br>Environment, | Demography               |
| 141             | 10plus   | Northwest  | Northwest_Columbia | Model                             | S. confluentus                               | Juvenile                                  | Flow,<br>Management,<br>Temperature_<br>FW | Habitat_Distribution,<br>Population_resilience     | Environment, ,<br>Management          | Dispersal,<br>Demography |

| Citation number | Duration | Region             | Subregion                           | Type of study                                    | Species                                       | Life stage                | Driver                                          | Response                                      | Driver Process                        | Response Process                        |
|-----------------|----------|--------------------|-------------------------------------|--------------------------------------------------|-----------------------------------------------|---------------------------|-------------------------------------------------|-----------------------------------------------|---------------------------------------|-----------------------------------------|
| 142             | 10plus   | Alaska             | Alaska_SE                           | Field/<br>RemoteSensing                          | O. nerka                                      | Juvenile                  | Disease,<br>Temperature_<br>FW                  | Immune                                        | Species_interactions,<br>Environment, | Physiology                              |
| 143             | 10plus   | Alaska             | Alaska_W                            | Field/<br>RemoteSensing                          | O. nerka                                      | Spawning                  | NA                                              | Behaviour, Phenology                          |                                       | Dispersal,<br>Demography                |
| 144             | 2to5     | Northwest          | Northwest_Columbia                  | Field/<br>RemoteSensing                          | O. mykiss                                     | Juvenile,<br>Spawning     | Management                                      | Behaviour, Carryover,<br>Performance          | , Management                          | Dispersal,<br>Demography,<br>Physiology |
| 145             | 2to5     | Northwest          | Northwest_Puget_Sound               | Field/<br>RemoteSensing                          | O. mykiss                                     | Juvenile,<br>Outmigration | Habitat                                         | Life_history                                  | Environment,                          | Demography                              |
| 146             | 10plus   | Alaska             | Alaska_SE                           | Field/<br>RemoteSensing                          | O. tshawytscha                                | Juvenile,<br>Marine       | Density_Food,<br>Flow,<br>Temperature_<br>FW    | Carryover, Growth,<br>Mortality               | Species_interactions,<br>Environment, | Demography,<br>Physiology               |
| 147             | 1        | Europe             | NA                                  | Lab/<br>Experimental                             | S. salar                                      | Outmigration              | Temperature_<br>FW                              | Physiology_Condition                          | Environment,                          | Physiology                              |
| 148             | 1        | Europe             | NA                                  | Field/<br>RemoteSensing                          | S. trutta                                     | Juvenile                  | Habitat                                         | Genetics_Adaptation,<br>Habitat_Distribution  | Environment,                          | Dispersal,<br>Evolution                 |
| 149             | 1        | British_Columbia   | British_Columbia_Fraser             | Field/<br>RemoteSensing,<br>Lab/<br>Experimental | O. gorbuscha, O. keta, O. mykiss,<br>O. nerka | Upmigration               | Flow,<br>Management                             | Behaviour, Mortality,<br>Physiology_Condition | Environment, ,<br>Management          | Dispersal,<br>Demography,<br>Physiology |
| 150             | 1        | Europe             | NA                                  | Lab/<br>Experimental                             | General                                       | Juvenile                  | Disease,<br>Temperature_<br>FW                  | NA                                            | Species_interactions,<br>Environment, | NA                                      |
| 151             | 10plus   | Alaska             | Alaska_S,<br>Alaska_SE,<br>Alaska_W | Field/<br>RemoteSensing                          | Other_species                                 | Marine                    | Climate_indices,<br>Ecosystem,<br>Environment   | Mortality                                     | Species_interactions,<br>Environment, | Demography                              |
| 152             | 10plus   | Northwest          | Northwest_Coastal                   | Field/<br>RemoteSensing                          | O. kisutch, O. tshawytscha                    | Marine                    | Ecosystem,<br>Habitat, Prey                     | Behaviour,<br>Habitat_Distribution            | Species_interactions,<br>Environment, | Dispersal                               |
| 153             | 1        | NA                 | NA                                  | Lab/<br>Experimental                             | Other_fish                                    | Marine                    | Acidity                                         | Performance                                   | Environment,                          | Physiology                              |
| 154             | NA       | NA                 | NA                                  | Review/<br>MetaAnalysis                          | General                                       | Marine                    | Acidity,<br>Management                          | NA                                            | Environment, ,<br>Management          | NA                                      |
| 155             | NA       | East_North_America | NA                                  | Review/<br>MetaAnalysis                          | S. salar                                      | General                   | Density_Food,<br>Habitat,<br>Temperature_<br>FW | Habitat_Distribution                          | Species_interactions,<br>Environment, | Dispersal                               |

| Citation number | Duration | Region                            | Subregion                                     | Type of study                                 | Species                                   | Life stage                         | Driver                                                           | Response                                    | Driver Process                     | Response Process       |
|-----------------|----------|-----------------------------------|-----------------------------------------------|-----------------------------------------------|-------------------------------------------|------------------------------------|------------------------------------------------------------------|---------------------------------------------|------------------------------------|------------------------|
| 156             | NA       | Europe                            | NA                                            | Model, Projections/<br>ecosystem              | General                                   | Juvenile                           | Ecosystem, Environment, Flow, Temperature_<br>FW                 | NA                                          | Species_interactions, Environment, | NA                     |
| 157             | NA       | NA                                | NA                                            | Theoretical/<br>Opinion                       | Salmonid_<br>general                      | Juvenile                           | Flow, Habitat, Management                                        | Habitat_Distribution, Population_resilience | Environment, , Management          | Dispersal, Demography  |
| 158             | 2to5     | Europe                            | NA                                            | Field/<br>RemoteSensing                       | S. salar                                  | Outmigration                       | Flow, Habitat                                                    | Mortality, Phenology                        | Environment,                       | Demography             |
| 159             | 1        | Northwest                         | Northwest_Coastal                             | Lab/<br>Experimental                          | O. tshawytscha                            | Juvenile, Upmigration              | Disease                                                          | Immune, Physiology_Condition                | Species_interactions,              | Physiology             |
| 160             | 10plus   | Europe                            | NA                                            | Field/<br>RemoteSensing, Model                | S. salar, S. trutta                       | Juvenile, Outmigration, Population | Flow, Management                                                 | Phenology                                   | Environment, , Management          | Demography             |
| 161             | NA       | NA                                | NA                                            | Review/<br>MetaAnalysis                       | Salmonid_<br>general                      | Juvenile, Outmigration             | Acidity, Environment                                             | Physiology_Condition                        | Environment,                       | Physiology             |
| 162             | 10plus   | California                        | California_N, California_S                    | Field/<br>RemoteSensing                       | Other_fish                                | Marine                             | Climate_indices, Ecosystem, Temperature_<br>marine               | NA                                          | Species_interactions, Environment, | NA                     |
| 163             | 10plus   | California, Largescale, Northwest | California_N, California_S, Northwest_Coastal | Field/<br>RemoteSensing                       | O. tshawytscha, Other_fish, Other_species | Marine                             | Climate_indices, Density_Food, Ecosystem, Environment, Predators | Growth, Productivity                        | Species_interactions, Environment, | Demography, Physiology |
| 164             | 6to10    | Australia_New Zealand             | NA                                            | Field/<br>RemoteSensing                       | O. mykiss                                 | Juvenile                           | Dissolved_oxygen, Temperature_<br>FW                             | Growth                                      | Environment,                       | Physiology             |
| 165             | 1        | Mountain_west                     | NA                                            | Field/<br>RemoteSensing, Lab/<br>Experimental | O. mykiss                                 | Juvenile                           | Temperature_<br>FW                                               | Physiology_Condition                        | Environment,                       | Physiology             |
| 166             | 1        | Northwest                         | Northwest_Puget_Sound                         | Lab/<br>Experimental                          | O. kisutch                                | Upmigration                        | NA                                                               | Physiology_Condition                        |                                    | Physiology             |
| 167             | NA       | Largescale                        | NA                                            | Model, Projections/<br>ecosystem              | General                                   | Marine                             | Ecosystem, Temperature_<br>FW                                    | Productivity                                | Species_interactions, Environment, | Demography             |

| Citation number | Duration | Region             | Subregion                   | Type of study       | Species        | Life stage                   | Driver                               | Response                                           | Driver Process                     | Response Process       |
|-----------------|----------|--------------------|-----------------------------|---------------------|----------------|------------------------------|--------------------------------------|----------------------------------------------------|------------------------------------|------------------------|
| 168             | 1        | East_North_America | NA                          | Lab/Experimental    | O. mykiss      | Juvenile                     | Contaminants, Temperature_FW         | Physiology_Condition                               | Environment,                       | Physiology             |
| 169             | 1        | Europe             | NA                          | Lab/Experimental    | S. salar       | Egg                          | Dissolved_oxygen                     | Morphology                                         | Environment,                       | Physiology             |
| 170             | 10plus   | East_North_America | NA                          | Field/RemoteSensing | S. fontinalis  | Egg, Juvenile                | Flow                                 | Productivity                                       | Environment,                       | Demography             |
| 171             | 1        | East_North_America | NA                          | Field/RemoteSensing | S. salar       | Marine                       | Methods                              | Mortality                                          |                                    | Demography             |
| 172             | 1        | East_North_America | NA                          | Field/RemoteSensing | S. salar       | Marine, Spawning             | Prey                                 | Habitat_Distribution, Life_history                 | Species_interactions,              | Dispersal, Demography  |
| 173             | 1        | Northwest          | Northwest_Puget_Sound       | Field/RemoteSensing | O. clarkii     | Freshwater_habitat, Spawning | Flow, Habitat                        | Habitat_Distribution                               | Environment,                       | Dispersal              |
| 174             | NA       | Largescale         | NA                          | Review/MetaAnalysis | General        | Juvenile, Marine             | Ecosystem, Fisheries                 | NA                                                 | Species_interactions, , Management | NA                     |
| 175             | 6to10    | Northwest          | Northwest_Puget_Sound       | Lab/Experimental    | O. kisutch     | Spawning                     | Genetics, Management                 | Genetics_Adaptation                                | Evolution, , Management            | Evolution              |
| 176             | 10plus   | British_Columbia   | British_Columbia_not_Fraser | Field/RemoteSensing | General        | Marine                       | Density_Food, Ecosystem, Environment | NA                                                 | Species_interactions, Environment, | NA                     |
| 177             | NA       | Largescale         | NA                          | Review/MetaAnalysis | General        | Marine                       | Ecosystem, Management, Methods       | NA                                                 | Species_interactions, , Management | NA                     |
| 178             | NA       | Europe             | NA                          | Review/MetaAnalysis | S. salar       | Freshwater_habitat           | Habitat, Management, Restoration     | Population_resilience                              | Environment, , Management          | Demography             |
| 179             | 1        | South_America      | NA                          | Lab/Experimental    | S. salar       | Juvenile                     | Temperature_FW                       | Carryover, Growth, Mortality, Physiology_Condition | Environment,                       | Demography, Physiology |
| 180             | 6to10    | Northwest          | Northwest_Columbia          | Field/RemoteSensing | O. tshawytscha | Juvenile, Upmigration        | Management, Temperature_FW           | Behaviour, Carryover                               | Environment, , Management          | Dispersal, Demography  |
| 181             | 2to5     | California         | California_CV               | Field/RemoteSensing | O. kisutch     | Juvenile                     | Methods                              | NA                                                 |                                    | NA                     |

| Citation number | Duration | Region           | Subregion                   | Type of study                     | Species                    | Life stage                                | Driver                                                                          | Response                                   | Driver Process                        | Response Process                        |
|-----------------|----------|------------------|-----------------------------|-----------------------------------|----------------------------|-------------------------------------------|---------------------------------------------------------------------------------|--------------------------------------------|---------------------------------------|-----------------------------------------|
| 182             | 1        | California       | California_S                | Field/<br>RemoteSensing           | O. mykiss                  | Juvenile,<br>Outmigration                 | Dissolved_oxygen,<br>Environment,<br>Temperature_<br>FW                         | Behaviour,<br>Performance                  | Environment,                          | Dispersal,<br>Physiology                |
| 183             | 10plus   | California       | California_S                | Field/<br>RemoteSensing           | O. mykiss                  | Outmigration                              | Environment,<br>Flow                                                            | Behaviour, Phenology                       | Environment,                          | Dispersal,<br>Demography                |
| 184             | 10plus   | Europe           | NA                          | Field/<br>RemoteSensing           | S. salar                   | Population,<br>Spawning                   | Fisheries                                                                       | Behaviour,<br>Life_history,<br>Performance | , Management                          | Dispersal,<br>Demography,<br>Physiology |
| 185             | NA       | Europe           | NA                          | Model,<br>Projections/<br>salmon  | S. trutta                  | Juvenile                                  | Disease,<br>Environment,<br>Temperature_<br>FW                                  | Growth,<br>Physiology_Condition            | Species_interactions,<br>Environment, | Physiology                              |
| 186             | 10plus   | British_Columbia | British_Columbia_not_Fraser | Field/<br>RemoteSensing           | O. nerka,<br>Other_species | Marine                                    | Density_Food,<br>Ecosystem,<br>Environment                                      | Mortality, Productivity                    | Species_interactions,<br>Environment, | Demography                              |
| 187             | NA       | NA               | NA                          | Model,<br>Theoretical/<br>Opinion | O. kisutch                 | Population                                | Fisheries                                                                       | Population_resilience,<br>Productivity     | , Management                          | Demography                              |
| 188             | 10plus   | Alaska           | Alaska_W                    | Model,<br>Theoretical/<br>Opinion | O. nerka                   | General                                   | Management                                                                      | Productivity                               | , Management                          | Demography                              |
| 189             | NA       | California       | California_S                | Model,<br>Projections/<br>salmon  | O. mykiss                  | Upmigration                               | Restoration                                                                     | NA                                         | , Management                          | NA                                      |
| 190             | NA       | California       | California_CV               | Field/<br>RemoteSensing           | O. tshawytscha             | Freshwater_habitat, Juvenile,<br>Spawning | Flow, Habitat,<br>Temperature_<br>FW                                            | NA                                         | Environment,                          | NA                                      |
| 191             | 1        | California       | California_S                | Lab/<br>Experimental              | O. mykiss                  | Juvenile                                  | Temperature_<br>FW                                                              | Growth                                     | Environment,                          | Physiology                              |
| 192             | NA       | NA               | NA                          | Review/<br>MetaAnalysis           | General                    | General                                   | Acidity,<br>Disease,<br>Dissolved_oxygen,<br>Environment,<br>Temperature_<br>FW | Immune                                     | Species_interactions,<br>Environment, | Physiology                              |



| Citation number | Duration | Region             | Subregion                       | Type of study                           | Species                  | Life stage              | Driver                           | Response                        | Driver Process            | Response Process       |
|-----------------|----------|--------------------|---------------------------------|-----------------------------------------|--------------------------|-------------------------|----------------------------------|---------------------------------|---------------------------|------------------------|
| 193             | 1        | Northwest          | Northwest_Columbia              | Lab/Experimental                        | Other_species            | Juvenile                | Invasives                        | NA                              | Species_interactions,     | NA                     |
| 194             | 1        | Alaska             | Alaska_W                        | Field/RemoteSensing                     | O. tshawytscha           | Upmigration             | Temperature_FW                   | Physiology_Condition            | Environment,              | Physiology             |
| 195             | 10plus   | Northwest          | Northwest_Columbia              | Field/RemoteSensing, Projections/salmon | O. tshawytscha           | Spawning, Upmigration   | Genetics, Temperature_FW         | Mortality                       | Evolution*, Environment,  | Demography             |
| 196             | 10plus   | Northwest          | Northwest_Columbia              | Field/RemoteSensing                     | O. tshawytscha           | Spawning                | Temperature_FW                   | Mortality                       | Environment,              | Demography             |
| 197             | 10plus   | Northwest          | Northwest_Columbia              | Field/RemoteSensing                     | O. mykiss                | Evolution, Marine       | Fisheries, Genetics              | Life_history, Maturation        | Evolution, , Management   | Demography, Physiology |
| 198             | 2to5     | Mountain_west      | NA                              | Field/RemoteSensing                     | O. mykiss, S. trutta     | Upmigration             | Fisheries, Temperature_FW        | Mortality                       | Environment, , Management | Demography             |
| 199             | 10plus   | Northwest          | Northwest_Columbia              | Model                                   | O. tshawytscha           | Marine, Upmigration     | NA                               | Behaviour, Phenology            |                           | Dispersal, Demography  |
| 200             | 6to10    | British_Columbia   | British_Columbia_not_Fraser     | Field/RemoteSensing                     | O. gorbuscha             | Spawning, Upmigration   | Disease                          | NA                              | Species_interactions,     | NA                     |
| 201             | NA       | British_Columbia   | British_Columbia_Fraser         | Review/MetaAnalysis                     | General                  | Freshwater_habitat      | Habitat, Management              | NA                              | Environment, , Management | NA                     |
| 202             | 1        | British_Columbia   | British_Columbia_Fraser         | Field/RemoteSensing                     | O. nerka                 | Spawning, Upmigration   | Disease                          | Physiology_Condition            | Species_interactions,     | Physiology             |
| 203             | 10plus   | California         | California_N, Northwest_Coastal | Projections/physical                    | General                  | Marine                  | Acidity                          | NA                              | Environment,              | NA                     |
| 204             | 2to5     | California         | California_CV                   | Field/RemoteSensing                     | O. tshawytscha           | Outmigration            | Density_Food, Methods, Predators | Mortality                       | Species_interactions,     | Demography             |
| 205             | 10plus   | British_Columbia   | British_Columbia_Fraser         | Field/RemoteSensing                     | O. nerka                 | Egg, Juvenile, Spawning | Flow, Temperature_FW             | Carryover, Morphology           | Environment,              | Demography, Physiology |
| 206             | 1        | East_North_America | NA                              | Lab/Experimental                        | S. salar                 | Juvenile                | Temperature_FW                   | Behaviour, Physiology_Condition | Environment,              | Dispersal, Physiology  |
| 207             | 2to5     | Alaska             | Alaska_W                        | Field/RemoteSensing                     | O. nerka, O. tshawytscha | Juvenile                | Habitat                          | Productivity                    | Environment,              | Demography             |
| 208             | 2to5     | California         | California_N                    | Field/RemoteSensing                     | O. mykiss                | Juvenile                | Temperature_FW                   | Habitat_Distribution            | Environment,              | Dispersal              |

| Citation number | Duration | Region                   | Subregion                                                         | Type of study                                                  | Species        | Life stage                                           | Driver                                          | Response                      | Driver Process                        | Response Process                   |
|-----------------|----------|--------------------------|-------------------------------------------------------------------|----------------------------------------------------------------|----------------|------------------------------------------------------|-------------------------------------------------|-------------------------------|---------------------------------------|------------------------------------|
| 209             | 2to5     | California               | California_N                                                      | Field/<br>RemoteSensing                                        | O. mykiss      | Juvenile                                             | Density_Food,<br>Habitat,<br>Temperature_<br>FW | Diet,<br>Habitat_Distribution | Species_interactions,<br>Environment, | Species_interactions,<br>Dispersal |
| 210             | 1        | Europe                   | NA                                                                | Lab/<br>Experimental                                           | O. mykiss      | Juvenile                                             | Contaminants,<br>Flow,<br>Temperature_<br>FW    | Physiology_Condition          | Environment,                          | Physiology                         |
| 211             | 10plus   | Northwest                | NA                                                                | Field/<br>RemoteSensing                                        | O. mykiss      | Marine                                               | Climate_indice<br>s,<br>Density_Food,<br>Prey   | Diet                          | Species_interactions,<br>Environment, | Species_interactions               |
| 212             | NA       | California,<br>Northwest | California_N,<br>Northwest_Co<br>astal                            | Review/<br>MetaAnalysis                                        | Other_fish     | Marine                                               | Density_Food,<br>Ecosystem,<br>Predators        | Habitat_Distribution          | Species_interactions,                 | Dispersal                          |
| 213             | 10plus   | Northwest                | Northwest_Co<br>astal                                             | Field/<br>RemoteSensing                                        | Other_fish     | Marine                                               | Density_Food,<br>Temperature_<br>marine         | NA                            | Species_interactions,<br>Environment, | NA                                 |
| 214             | 10plus   | California,<br>Northwest | California_N,<br>California_S,<br>Northwest_Co<br>astal           | Field/<br>RemoteSensing,<br>Model,<br>Projections/<br>physical | Other_fish     | Marine                                               | Environment,<br>Temperature_<br>marine          | NA                            | Environment,                          | NA                                 |
| 215             | 10plus   | California               | California_CV,<br>California_N                                    | Field/<br>RemoteSensing,<br>Model, Review/<br>MetaAnalysis     | Other_fish     | Juvenile,<br>Marine,<br>Outmigration,<br>Upmigration | Contaminants,<br>Ecosystem,<br>Environment      | Life_history                  | Species_interactions,<br>Environment, | Demography                         |
| 216             | NA       | California,<br>Northwest | California_N,<br>Northwest_Co<br>astal,<br>Northwest_Col<br>umbia | Field/<br>RemoteSensing                                        | General        | Juvenile,<br>Outmigration                            | Habitat,<br>Restoration                         | NA                            | Environment, ,<br>Management          | NA                                 |
| 217             | 2to5     | Northwest                | Northwest_Col<br>umbia                                            | Field/<br>RemoteSensing                                        | O. tshawytscha | Marine                                               | Flow,<br>Temperature_<br>marine                 | Mortality                     | Environment,                          | Demography                         |

| Citation number | Duration | Region                | Subregion                                            | Type of study       | Species                   | Life stage                       | Driver                             | Response                                    | Driver Process                                  | Response Process                  |
|-----------------|----------|-----------------------|------------------------------------------------------|---------------------|---------------------------|----------------------------------|------------------------------------|---------------------------------------------|-------------------------------------------------|-----------------------------------|
| 218             | NA       | Northwest             | Northwest_Coastal                                    | Model               | General                   | Freshwater_habitat, Outmigration | Temperature_FW, Temperature_marine | NA                                          | Environment,                                    | NA                                |
| 219             | 10plus   | British_Columbia      | British_Columbia_Fraser, British_Columbia_not_Fraser | Field/RemoteSensing | Salmonid_general          | Spawning                         | Ecosystem, Habitat                 | NA                                          | Species_interactions, Environment,              | NA                                |
| 220             | NA       | Australia_New Zealand | NA                                                   | Model               | Other_fish, Other_species | Marine                           | Density_Food, Ecosystem, Fisheries | NA                                          | Species_interactions, , Management              | NA                                |
| 221             | 10plus   | Alaska                | Alaska_W                                             | Field/RemoteSensing | O. keta, O. tshawytscha   | Population                       | NA                                 | Maturation, Phenology, Productivity         |                                                 | Demography, Physiology            |
| 222             | NA       | East_North_America    | NA                                                   | Review/MetaAnalysis | Salmonid_general          | Juvenile                         | Habitat                            | Habitat_Distribution                        | Environment,                                    | Dispersal                         |
| 223             | 1        | Europe                | NA                                                   | Field/RemoteSensing | S. salar, S. trutta       | Juvenile, Upmigration            | Disease, Temperature_FW            | Physiology_Condition                        | Species_interactions, Environment,              | Physiology                        |
| 224             | 2to5     | California            | California_CV                                        | Field/RemoteSensing | O. tshawytscha            | Outmigration                     | Flow, Management                   | Habitat_Distribution, Mortality             | Environment, , Management                       | Dispersal, Demography             |
| 225             | 6to10    | California            | California_CV                                        | Field/RemoteSensing | O. mykiss                 | Outmigration                     | Flow, Habitat, Management          | Habitat_Distribution, Mortality             | Environment, , Management                       | Dispersal, Demography             |
| 226             | 6to10    | California            | California_CV                                        | Field/RemoteSensing | O. tshawytscha            | Juvenile, Outmigration           | Flow                               | Mortality                                   | Environment,                                    | Demography                        |
| 227             | NA       | Europe                | NA                                                   | Model               | S. salar                  | Juvenile                         | Habitat, Methods                   | Habitat_Distribution, Population_resilience | Environment,                                    | Dispersal, Demography             |
| 228             | 2to5     | Northwest             | Northwest_Puget_Sound                                | Field/RemoteSensing | O. clarkii, O. kisutch    | Juvenile                         | Density_Food                       | Behaviour, Growth, Mortality                | Species_interactions,                           | Dispersal, Demography, Physiology |
| 229             | NA       | Australia_New Zealand | NA                                                   | Model               | General                   | Outmigration                     | Ecosystem, Environment, Management | NA                                          | Species_interactions, Environment, , Management | NA                                |
| 230             | NA       | NA                    | NA                                                   | Review/MetaAnalysis | General                   | Marine                           | Disease                            | NA                                          | Species_interactions,                           | NA                                |
| 231             | NA       | NA                    | NA                                                   | Review/MetaAnalysis | O. tshawytscha            | Upmigration                      | Disease                            | Mortality                                   | Species_interactions,                           | Demography                        |

| Citation number | Duration | Region                | Subregion                                     | Type of study              | Species                                            | Life stage         | Driver                                                                        | Response                        | Driver Process                     | Response Process       |
|-----------------|----------|-----------------------|-----------------------------------------------|----------------------------|----------------------------------------------------|--------------------|-------------------------------------------------------------------------------|---------------------------------|------------------------------------|------------------------|
| 232             | 2to5     | Northwest             | Northwest_Columbia                            | Field/RemoteSensing, Model | O. tshawytscha                                     | Marine             | NA                                                                            | Behaviour, Physiology_Condition |                                    | Dispersal, Physiology  |
| 233             | 6to10    | Northwest             | Northwest_Columbia                            | Field/RemoteSensing, Model | O. tshawytscha                                     | Marine             | Temperature_marine                                                            | Habitat_Distribution            | Environment,                       | Dispersal              |
| 234             | 6to10    | Northwest             | Northwest_Columbia                            | Field/RemoteSensing        | O. tshawytscha                                     | Marine             | Climate_indices, Density_Food, Environment, Methods, Prey, Temperature_marine | Mortality, Productivity         | Species_interactions, Environment, | Demography             |
| 235             | NA       | Europe                | NA                                            | Model                      | Other_fish                                         | Juvenile, Spawning | Flow, Management                                                              | Mortality                       | Environment, , Management          | Demography             |
| 236             | 1        | British_Columbia      | British_Columbia_Fraser                       | Field/RemoteSensing        | O. nerka                                           | Upmigration        | Flow, Management                                                              | Mortality                       | Environment, , Management          | Demography             |
| 237             | 1        | British_Columbia      | British_Columbia_Fraser                       | Field/RemoteSensing        | O. nerka                                           | Upmigration        | Flow, Management                                                              | Carryover, Mortality            | Environment, , Management          | Demography             |
| 238             | 1        | British_Columbia      | British_Columbia_Fraser                       | Lab/Experimental           | O. nerka                                           | Egg, Juvenile      | Temperature_FW                                                                | Carryover, Performance          | Environment,                       | Demography, Physiology |
| 239             | 1        | British_Columbia      | British_Columbia_Fraser                       | Lab/Experimental           | O. nerka                                           | Egg, Juvenile      | Temperature_FW                                                                | Carryover, Performance          | Environment,                       | Demography, Physiology |
| 240             | NA       | California, Northwest | California_N, California_S, Northwest_Coastal | Review/MetaAnalysis        | Other_fish, Other_species                          | Marine             | Acidity                                                                       | Mortality                       | Environment,                       | Demography             |
| 241             | NA       | Northwest             | Northwest_Puget_Sound                         | Model                      | General                                            | Marine             | Acidity, Density_Food, Ecosystem                                              | NA                              | Species_interactions, Environment, | NA                     |
| 242             | NA       | Northwest             | Northwest_Puget_Sound                         | Model                      | O. keta, O. mykiss, O. tshawytscha, S. confluentus | General            | Ecosystem, Management                                                         | Mortality                       | Species_interactions, , Management | Demography             |
| 243             | 6to10    | Northwest             | Northwest_Coastal                             | Field/RemoteSensing        | O. kisutch                                         | Spawning           | Flow, Temperature_FW                                                          | Habitat_Distribution, Phenology | Environment,                       | Dispersal, Demography  |

| Citation number | Duration | Region             | Subregion               | Type of study              | Species                             | Life stage       | Driver                                      | Response                                   | Driver Process                     | Response Process       |
|-----------------|----------|--------------------|-------------------------|----------------------------|-------------------------------------|------------------|---------------------------------------------|--------------------------------------------|------------------------------------|------------------------|
| 244             | 6to10    | East_North_America | NA                      | Field/RemoteSensing, Model | S. fontinalis                       | Juvenile         | Habitat, Temperature_FW                     | Habitat_Distribution                       | Environment,                       | Dispersal              |
| 245             | NA       | East_North_America | NA                      | Model                      | S. salar                            | Marine           | Environment                                 | Behaviour, Habitat_Distribution            | Environment,                       | Dispersal              |
| 246             | NA       | British_Columbia   | British_Columbia_Fraser | Model, Review/MetaAnalysis | O. nerka, O. tshawytscha, S. salar  | Marine           | Habitat                                     | Behaviour, Habitat_Distribution            | Environment,                       | Dispersal              |
| 247             | 2to5     | Alaska             | Alaska_W                | Field/RemoteSensing        | O. nerka                            | Spawning         | Habitat                                     | Habitat_Distribution, Morphology           | Environment,                       | Dispersal, Physiology  |
| 248             | NA       | Mountain_west      | NA                      | Field/RemoteSensing        | Other_fish                          | Population       | Genetics, Management                        | Genetics_Adaptation, Habitat_Distribution  | Evolution, , Management            | Dispersal, Evolution   |
| 249             | 2to5     | Alaska             | Alaska_S                | Field/RemoteSensing        | O. kisutch                          | Juvenile         | Density_Food, Habitat, Prey, Temperature_FW | Growth                                     | Species_interactions, Environment, | Physiology             |
| 250             | 2to5     | Alaska             | Alaska_S                | Field/RemoteSensing        | O. kisutch                          | Egg              | Habitat, Temperature_FW                     | Growth, Phenology                          | Environment,                       | Demography, Physiology |
| 251             | 10plus   | South_America      | NA                      | Model                      | Other_fish                          | Marine           | Density_Food, Ecosystem                     | Growth                                     | Species_interactions,              | Physiology             |
| 252             | 10plus   | Alaska             | Alaska_W                | Field/RemoteSensing        | O. nerka                            | Upmigration      | Temperature_FW                              | Phenology                                  | Environment,                       | Demography             |
| 253             | 2to5     | Alaska             | Alaska_W                | Field/RemoteSensing        | O. nerka                            | Upmigration      | Temperature_FW                              | Physiology_Condition                       | Environment,                       | Physiology             |
| 254             | 6to10    | Alaska             | Alaska_W                | Field/RemoteSensing        | O. nerka                            | Marine, Spawning | Temperature_marine                          | Mortality, Performance                     | Environment,                       | Demography, Physiology |
| 255             | 10plus   | East_North_America | NA                      | Model                      | O. mykiss, S. fontinalis, S. trutta | Juvenile         | Management, Methods, Temperature_FW         | Population_resilience                      | Environment, , Management          | Demography             |
| 256             | 10plus   | East_North_America | NA                      | Model, Projections/salmon  | O. mykiss, S. fontinalis, S. trutta | Juvenile         | Management, Temperature_FW                  | Population_resilience                      | Environment, , Management          | Demography             |
| 257             | 10plus   | Europe             | NA                      | Field/RemoteSensing, Model | S. salar                            | Marine           | Methods, Temperature_marine                 | NA                                         | Environment,                       | NA                     |
| 258             | NA       | NA                 | NA                      | Review/MetaAnalysis        | Salmonid_general                    | Evolution        | Genetics                                    | Genetics_Adaptation, Population_resilience | Evolution,                         | Demography, Evolution  |

| Citation number | Duration | Region             | Subregion                   | Type of study              | Species                   | Life stage                   | Driver                                       | Response                           | Driver Process                     | Response Process      |
|-----------------|----------|--------------------|-----------------------------|----------------------------|---------------------------|------------------------------|----------------------------------------------|------------------------------------|------------------------------------|-----------------------|
| 259             | NA       | Northwest          | Northwest_Columbia          | Field/RemoteSensing, Model | O. tshawytscha            | Freshwater_habitat, Juvenile | Flow, Habitat, Management, Temperature_FW    | Habitat_Distribution               | Environment, , Management          | Dispersal             |
| 260             | 1        | East_North_America | NA                          | Lab/Experimental           | O. mykiss                 | Juvenile                     | Dissolved_oxygen                             | Performance, Physiology_Condition  | Environment,                       | Physiology            |
| 261             | 1        | East_North_America | NA                          | Lab/Experimental           | O. mykiss                 | Juvenile                     | Temperature_FW                               | Performance, Physiology_Condition  | Environment,                       | Physiology            |
| 262             | 10plus   | Alaska             | Alaska_W                    | Field/RemoteSensing        | Salmonid_general          | Population                   | Fisheries, Habitat                           | Habitat_Distribution               | Environment, , Management          | Dispersal             |
| 263             | 2to5     | British_Columbia   | British_Columbia_not_Fraser | Field/RemoteSensing        | O. nerka                  | Juvenile, Outmigration       | Habitat                                      | Phenology, Population_resilience   | Environment,                       | Demography            |
| 264             | 1        | Europe             | NA                          | Lab/Experimental           | Other_species             | Marine                       | Acidity, Disease, Ecosystem                  | NA                                 | Species_interactions, Environment, | NA                    |
| 265             | NA       | NA                 | NA                          | Review/MetaAnalysis        | General                   | Freshwater_habitat, Marine   | Ecosystem, Environment, Flow, Temperature_FW | Life_history                       | Species_interactions, Environment, | Demography            |
| 266             | 1        | British_Columbia   | British_Columbia_not_Fraser | Lab/Experimental           | O. kisutch                | Juvenile                     | Temperature_FW                               | Performance, Physiology_Condition  | Environment,                       | Physiology            |
| 267             | 2to5     | Northwest          | Northwest_Columbia          | Field/RemoteSensing        | O. mykiss, O. tshawytscha | Upmigration                  | Habitat, Temperature_FW                      | Behaviour                          | Environment,                       | Dispersal             |
| 268             | 2to5     | Largescale         | NA                          | Review/MetaAnalysis        | General, Other_species    | Marine                       | Ecosystem, Environment, Temperature_marine   | Habitat_Distribution, Productivity | Species_interactions, Environment, | Dispersal, Demography |
| 269             | 6to10    | East_North_America | NA                          | Field/RemoteSensing        | Other_fish                | Population                   | Environment                                  | Life_history                       | Environment,                       | Demography            |
| 270             | 2to5     | British_Columbia   | British_Columbia_Fraser     | Field/RemoteSensing        | O. keta, O. tshawytscha   | Juvenile, Outmigration       | Density_Food, Habitat                        | Habitat_Distribution               | Species_interactions, Environment, | Dispersal             |
| 271             | 2to5     | Northwest          | Northwest_Puget_Sound       | Field/RemoteSensing        | O. tshawytscha            | Outmigration, Population     | Density_Food, Habitat, Temperature_FW        | Habitat_Distribution, Life_history | Species_interactions, Environment, | Dispersal, Demography |

| Citation number | Duration | Region             | Subregion               | Type of study                         | Species        | Life stage                     | Driver                                                                | Response                                               | Driver Process                                 | Response Process                  |
|-----------------|----------|--------------------|-------------------------|---------------------------------------|----------------|--------------------------------|-----------------------------------------------------------------------|--------------------------------------------------------|------------------------------------------------|-----------------------------------|
| 272             | NA       | NA                 | NA                      | Model                                 | General        | Evolution                      | Ecosystem, Environment                                                | Genetics_Adaptation                                    | Species_interactions, Environment,             | Evolution*                        |
| 273             | 1        | British_Columbia   | British_Columbia_Fraser | Field/RemoteSensing, Lab/Experimental | O. kisutch     | Upmigration                    | Disease, Management                                                   | Mortality, Physiology_Condition                        | Species_interactions, , Management             | Demography, Physiology            |
| 274             | 1        | East_North_America | NA                      | Field/RemoteSensing                   | S. salar       | Upmigration                    | Disease, Genetics, Temperature_FW                                     | Immune, Performance, Physiology_Condition              | Species_interactions, Evolution*, Environment, | Physiology                        |
| 275             | 10plus   | East_North_America | NA                      | Field/RemoteSensing                   | S. salar       | Marine, Spawning               | Density_Food                                                          | Carryover, Mortality                                   | Species_interactions,                          | Demography                        |
| 276             | 10plus   | Largescale         | NA                      | Field/RemoteSensing                   | O. tshawytscha | Marine                         | Fisheries, Predators                                                  | Mortality                                              | Species_interactions, , Management             | Demography                        |
| 277             | 10plus   | Northwest          | Northwest_Columbia      | Field/RemoteSensing                   | O. tshawytscha | Juvenile, Marine, Outmigration | Climate_indices, Flow, Management, Temperature_FW, Temperature_marine | Carryover, Mortality                                   | Environment, , Management                      | Demography                        |
| 278             | NA       | East_North_America | NA                      | Field/RemoteSensing                   | Other_fish     | Juvenile                       | Habitat                                                               | Growth                                                 | Environment,                                   | Physiology                        |
| 279             | 1        | California         | California_S            | Lab/Experimental                      | Other_fish     | Egg, Marine                    | Acidity                                                               | Physiology_Condition                                   | Environment,                                   | Physiology                        |
| 280             | 6to10    | California         | California_N            | Field/RemoteSensing                   | O. tshawytscha | Outmigration                   | Density_Food, Flow, Habitat, Prey                                     | Carryover, Growth, Habitat_Distribution, Mortality     | Species_interactions, Environment,             | Dispersal, Demography, Physiology |
| 281             | 1        | Northwest          | Northwest_Puget_Sound   | Field/RemoteSensing                   | O. mykiss      | Juvenile, Marine, Outmigration | Contaminants, Disease                                                 | Mortality                                              | Species_interactions, Environment,             | Demography                        |
| 282             | 1        | Asia_other         | NA                      | Lab/Experimental                      | O. mykiss      | Juvenile                       | Acidity                                                               | Growth, Physiology_Condition                           | Environment,                                   | Physiology                        |
| 283             | 1        | Northwest          | Northwest_Columbia      | Field/RemoteSensing                   | O. mykiss      | Evolution                      | Temperature_FW                                                        | Genetics_Adaptation, Performance, Physiology_Condition | Environment,                                   | Evolution, Physiology             |
| 284             | 1        | Northwest          | Northwest_Columbia      | Lab/Experimental                      | O. mykiss      | Evolution                      | Genetics, Temperature_FW                                              | Genetics_Adaptation                                    | Evolution, Environment,                        | Evolution                         |

| Citation number | Duration | Region                                          | Subregion                   | Type of study                                             | Species                      | Life stage           | Driver                                            | Response                                                 | Driver Process                                     | Response Process                  |
|-----------------|----------|-------------------------------------------------|-----------------------------|-----------------------------------------------------------|------------------------------|----------------------|---------------------------------------------------|----------------------------------------------------------|----------------------------------------------------|-----------------------------------|
| 285             | 1        | Australia_New Zealand                           | NA                          | Lab/<br>Experimental                                      | O. mykiss                    | Juvenile             | Temperature_<br>FW                                | Performance,<br>Physiology_Condition                     | Environment,                                       | Physiology                        |
| 286             | 1        | British_Columbia                                | British_Columbia_Fraser     | Lab/<br>Experimental                                      | O. nerka                     | Egg                  | Temperature_<br>FW                                | Performance,<br>Physiology_Condition                     | Environment,                                       | Physiology                        |
| 287             | NA       | Alaska, British_Columbia, Largescale, Northwest | NA                          | Field/<br>RemoteSensing, Model, Projections/<br>ecosystem | Other_fish, Salmonid_general | Marine               | Climate_indices, Ecosystem, Temperature_marine    | Habitat_Distribution, Productivity                       | Species_interactions, Environment,                 | Dispersal, Demography             |
| 288             | NA       | East_North_America                              | NA                          | Model, Projections/<br>ecosystem                          | Other_species                | Marine               | Acidity, Dissolved_oxygen, Ecosystem, Fisheries   | NA                                                       | Species_interactions, Environment, ,<br>Management | NA                                |
| 289             | NA       | Europe                                          | NA                          | Review/<br>MetaAnalysis                                   | Other_fish                   | Marine               | Acidity, Ecosystem, Fisheries, Temperature_marine | NA                                                       | Species_interactions, Environment, ,<br>Management | NA                                |
| 290             | NA       | Largescale                                      | NA                          | Model, Projections/<br>ecosystem                          | Other_fish, Salmonid_general | Marine               | Fisheries                                         | NA                                                       | , Management                                       | NA                                |
| 291             | 1        | Northwest                                       | Northwest_Columbia          | Field/<br>RemoteSensing                                   | O. tshawytscha               | Juvenile             | Habitat                                           | Growth, Habitat_Distribution, Phenology                  | Environment,                                       | Dispersal, Demography, Physiology |
| 292             | 1        | Northwest                                       | Northwest_Columbia          | Field/<br>RemoteSensing                                   | O. tshawytscha               | Juvenile             | Density_Food, Habitat, Temperature_FW             | Growth                                                   | Species_interactions, Environment,                 | Physiology                        |
| 293             | 6to10    | Northwest                                       | Northwest_Columbia          | Field/<br>RemoteSensing                                   | O. tshawytscha               | Juvenile             | Habitat                                           | Growth, Habitat_Distribution, Phenology                  | Environment,                                       | Dispersal, Demography, Physiology |
| 294             | 10plus   | British_Columbia                                | British_Columbia_not_Fraser | Field/<br>RemoteSensing                                   | O. kisutch                   | Marine, Outmigration | Ecosystem, Management, Prey                       | Mortality                                                | Species_interactions, , Management                 | Demography                        |
| 295             | NA       | Largescale                                      | NA                          | Review/<br>MetaAnalysis                                   | Salmonid_general             | Marine               | Climate_indices, Temperature_marine               | Behaviour, Habitat_Distribution, Life_history, Mortality | Environment,                                       | Dispersal, Demography             |



| Citation number | Duration | Region             | Subregion                                | Type of study                                    | Species                   | Life stage            | Driver                                       | Response                                                            | Driver Process                     | Response Process                  |
|-----------------|----------|--------------------|------------------------------------------|--------------------------------------------------|---------------------------|-----------------------|----------------------------------------------|---------------------------------------------------------------------|------------------------------------|-----------------------------------|
| 296             | 2to5     | British_Columbia   | British_Columbia_not_Fraser              | Field/RemoteSensing                              | O. tshawytscha            | Marine, Outmigration  | Density_Food, Ecosystem, Environment, Prey   | Mortality, Phenology                                                | Species_interactions, Environment, | Demography                        |
| 297             | 10plus   | Asia_other         | NA                                       | Field/RemoteSensing                              | O. masou                  | Population            | Flow                                         | Growth, Habitat_Distribution, Life_history, Mortality, Productivity | Environment,                       | Dispersal, Demography, Physiology |
| 298             | NA       | East_North_America | NA                                       | Field/RemoteSensing                              | Other_fish                | Evolution             | Genetics                                     | Genetics_Adaptation, Population_resilience                          | Evolution,                         | Demography, Evolution             |
| 299             | 1        | Northwest          | Northwest_Columbia                       | Field/RemoteSensing                              | O. mykiss                 | Juvenile              | Predators                                    | Mortality                                                           | Species_interactions,              | Demography                        |
| 300             | 10plus   | Mountain_west      | NA                                       | Field/RemoteSensing, Model, Projections/physical | O. clarkii, S. fontinalis | Juvenile              | Temperature_FW                               | Growth, Physiology_Condition                                        | Environment,                       | Physiology                        |
| 301             | 1        | Europe             | NA                                       | Lab/Experimental                                 | S. salar                  | Juvenile              | Management                                   | Growth, Life_history, Maturation                                    | , Management                       | Demography, Physiology            |
| 302             | 10plus   | California         | California_N, California_S               | Field/RemoteSensing, Model                       | Other_species             | Marine                | Density_Food, Ecosystem, Environment         | NA                                                                  | Species_interactions, Environment, | NA                                |
| 303             | 1        | Northwest          | Northwest_Columbia                       | Field/RemoteSensing                              | O. mykiss                 | Upmigration           | Habitat, Temperature_FW                      | Habitat_Distribution                                                | Environment,                       | Dispersal                         |
| 304             | 2to5     | Northwest          | Northwest_Columbia                       | Field/RemoteSensing                              | O. mykiss, O. tshawytscha | Upmigration           | Temperature_FW                               | Physiology_Condition                                                | Environment,                       | Physiology                        |
| 305             | 2to5     | Northwest          | Northwest_Columbia                       | Field/RemoteSensing                              | O. tshawytscha            | Marine                | Management                                   | Mortality, Phenology                                                | , Management                       | Demography                        |
| 306             | 6to10    | Northwest          | Northwest_Coastal, Northwest_Puget_Sound | Field/RemoteSensing                              | O. tshawytscha            | Marine                | Climate_indices, Methods, Temperature_marine | Growth, Mortality                                                   | Environment,                       | Demography, Physiology            |
| 307             | NA       | Largescale         | NA                                       | Lab/Experimental                                 | General                   | General               | Temperature_FW                               | Performance, Physiology_Condition                                   | Environment,                       | Physiology                        |
| 308             | 1        | Northwest          | British_Columbia_Fraser                  | Field/RemoteSensing                              | O. nerka                  | Upmigration           | Flow                                         | Performance, Physiology_Condition                                   | Environment,                       | Physiology                        |
| 309             | 1        | British_Columbia   | British_Columbia_Fraser                  | Lab/Experimental                                 | O. gorbuscha              | Spawning, Upmigration | Temperature_FW                               | Performance, Physiology_Condition                                   | Environment,                       | Physiology                        |

| Citation number | Duration | Region             | Subregion                             | Type of study                | Species             | Life stage            | Driver                          | Response                                    | Driver Process            | Response Process       |
|-----------------|----------|--------------------|---------------------------------------|------------------------------|---------------------|-----------------------|---------------------------------|---------------------------------------------|---------------------------|------------------------|
| 310             | 1, 2to5  | British_Columbia   | British_Columbia_not_Fraser           | Lab/Experimental             | O. kisutch          | Upmigration           | Fisheries, Temperature_FW       | Physiology_Condition                        | Environment, , Management | Physiology             |
| 311             | NA       | NA                 | NA                                    | Review/MetaAnalysis          | Other_fish          | Juvenile              | Temperature_FW                  | Performance, Physiology_Condition           | Environment,              | Physiology             |
| 312             | 10plus   | Europe             | NA                                    | Field/RemoteSensing          | S. salar, S. trutta | Juvenile              | Climate_indices, Temperature_FW | Population_resilience                       | Environment,              | Demography             |
| 313             | 1        | California         | California_CV                         | Lab/Experimental             | O. mykiss           | Juvenile              | Flow, Management                | Physiology_Condition                        | Environment, , Management | Physiology             |
| 314             | 10plus   | California         | California_N                          | Field/RemoteSensing          | O. kisutch          | Marine, Spawning      | Methods                         | Mortality                                   |                           | Demography             |
| 315             | 1        | NA                 | NA                                    | Lab/Experimental, Model      | General             | Juvenile, Upmigration | Contaminants, Flow, Methods     | NA                                          | Environment,              | NA                     |
| 316             | 1        | Northwest          | Northwest_Coastal                     | Lab/Experimental             | O. mykiss           | Juvenile              | Temperature_FW                  | Life_history, Maturation                    | Environment,              | Demography, Physiology |
| 317             | 1        | NA                 | NA                                    | Lab/Experimental             | Other_fish          | Marine                | Acidity                         | Physiology_Condition                        | Environment,              | Physiology             |
| 318             | 10plus   | Northwest          | Northwest_Coastal, Northwest_Columbia | Field/RemoteSensing          | O. mykiss           | Upmigration           | Genetics                        | Phenology                                   | Evolution,                | Demography             |
| 319             | NA       | NA                 | NA                                    | Review/MetaAnalysis          | General             | Freshwater_habitat    | Habitat                         | Habitat_Distribution, Population_resilience | Environment,              | Dispersal, Demography  |
| 320             | 1        | Largescale         | NA                                    | Lab/Experimental             | Other_species       | Marine                | Acidity                         | NA                                          | Environment,              | NA                     |
| 321             | 1        | Largescale         | NA                                    | Theoretical/Opinion          | Other_species       | Marine                | Acidity                         | NA                                          | Environment,              | NA                     |
| 322             | 1        | Europe             | NA                                    | Lab/Experimental             | Other_species       | Marine                | Acidity                         | Performance, Physiology_Condition           | Environment,              | Physiology             |
| 323             | NA       | Largescale         | NA                                    | Model, Projections/ecosystem | Other_species       | Marine                | Acidity                         | NA                                          | Environment,              | NA                     |
| 324             | 1        | Largescale         | NA                                    | Projections/ecosystem        | Other_species       | Marine                | Acidity                         | NA                                          | Environment,              | NA                     |
| 325             | 1        | East_North_America | NA                                    | Lab/Experimental             | Other_species       | Marine                | Acidity                         | NA                                          | Environment,              | NA                     |

| Citation number | Duration | Region                               | Subregion               | Type of study                         | Species                                    | Life stage                 | Driver                                                                            | Response                            | Driver Process                                  | Response Process      |
|-----------------|----------|--------------------------------------|-------------------------|---------------------------------------|--------------------------------------------|----------------------------|-----------------------------------------------------------------------------------|-------------------------------------|-------------------------------------------------|-----------------------|
| 326             | 2to5     | Northwest                            | Northwest_Columbia      | Field/RemoteSensing, Lab/Experimental | O. tshawytscha                             | Egg, Spawning              | Temperature_FW                                                                    | Habitat_Distribution                | Environment,                                    | Dispersal             |
| 327             | 6to10    | Northwest                            | Northwest_Columbia      | Field/RemoteSensing, Model            | O. tshawytscha                             | Spawning, Upmigration      | Flow, Temperature_FW                                                              | Population_resilience, Productivity | Environment,                                    | Demography            |
| 328             | 10plus   | British_Columbia                     | British_Columbia_Fraser | Model                                 | O. gorbuscha, O. nerka                     | Marine                     | Climate_indices, Density_Food, Disease, Ecosystem, Management, Temperature_marine | NA                                  | Species_interactions, Environment, , Management | NA                    |
| 329             | 10plus   | Alaska, British_Columbia, Largescale | NA                      | Field/RemoteSensing                   | O. nerka                                   | Marine                     | Density_Food, Temperature_marine                                                  | Productivity                        | Species_interactions, Environment,              | Demography            |
| 330             | NA       | NA                                   | NA                      | Review/MetaAnalysis                   | General                                    | Evolution                  | Genetics                                                                          | Genetics_Adaptation, Morphology     | Evolution,                                      | Evolution, Physiology |
| 331             | 1        | East_North_America                   | NA                      | Lab/Experimental                      | S. fontinalis                              | Egg                        | Genetics, Temperature_FW                                                          | Physiology_Condition                | Evolution, Environment,                         | Physiology            |
| 332             | 1        | East_North_America                   | NA                      | Lab/Experimental                      | O. mykiss                                  | Egg, Juvenile, Upmigration | Flow                                                                              | Behaviour, Performance              | Environment,                                    | Dispersal, Physiology |
| 333             | NA       | NA                                   | NA                      | Review/MetaAnalysis                   | Other_fish, Salmonid_general               | Marine                     | Fisheries, Management                                                             | Mortality                           | , Management                                    | Demography            |
| 334             | NA       | NA                                   | NA                      | Review/MetaAnalysis                   | Salmonid_general                           | Upmigration                | Management                                                                        | Physiology_Condition                | , Management                                    | Physiology            |
| 335             | 10plus   | Northwest                            | Northwest_Columbia      | Field/RemoteSensing                   | O. clarkii, O. tshawytscha, S. confluentus | Juvenile                   | Climate_indices, Density_Food, Flow, Temperature_FW                               | Productivity                        | Species_interactions, Environment,              | Demography            |
| 336             | 6to10    | Northwest                            | Northwest_Columbia      | Field/RemoteSensing                   | O. mykiss                                  | Spawning, Upmigration      | Habitat                                                                           | Behaviour, Life_history             | Environment,                                    | Dispersal, Demography |

| Citation number | Duration | Region                               | Subregion           | Type of study       | Species              | Life stage                             | Driver                                     | Response                                                 | Driver Process                                  | Response Process       |
|-----------------|----------|--------------------------------------|---------------------|---------------------|----------------------|----------------------------------------|--------------------------------------------|----------------------------------------------------------|-------------------------------------------------|------------------------|
| 337             | 6to10    | Northwest                            | Northwest_Columbia  | Field/RemoteSensing | O. tshawytscha       | Freshwater_habitat, Juvenile, Spawning | Restoration                                | Habitat_Distribution                                     | , Management                                    | Dispersal              |
| 338             | 6to10    | California                           | California_CV       | Field/RemoteSensing | O. tshawytscha       | Outmigration                           | Temperature_FW                             | Life_history, Phenology                                  | Environment,                                    | Demography             |
| 339             | 2to5     | East_North_America                   | NA                  | Field/RemoteSensing | S. salar             | Juvenile                               | Flow, Habitat, Temperature_FW              | Habitat_Distribution                                     | Environment,                                    | Dispersal              |
| 340             | 1        | Europe                               | NA                  | Lab/Experimental    | S. salar             | Egg                                    | Environment, Management                    | Growth, Physiology_Condition                             | Environment, , Management                       | Physiology             |
| 341             | NA       | British_Columbia, East_North_America | NA                  | Theoretical/Opinion | General              | Marine                                 | Acidity, Ecosystem, Environment, Fisheries | NA                                                       | Species_interactions, Environment, , Management | NA                     |
| 342             | 2to5     | Europe                               | NA                  | Lab/Experimental    | S. salar             | Egg                                    | Dissolved_oxygen                           | Genetics_Adaptation, Mortality, Phenology                | Environment,                                    | Demography, Evolution  |
| 343             | 1        | East_North_America                   | NA                  | Lab/Experimental    | O. mykiss            | Juvenile                               | Temperature_FW                             | Performance, Physiology_Condition                        | Environment,                                    | Physiology             |
| 344             | 1        | Alaska                               | Alaska_SE, Alaska_W | Field/RemoteSensing | O. tshawytscha       | Spawning, Upmigration                  | Methods                                    | Physiology_Condition                                     |                                                 | Physiology             |
| 345             | 2to5     | Alaska                               | Alaska_S            | Field/RemoteSensing | O. tshawytscha       | Marine                                 | Predators                                  | Behaviour, Mortality                                     | Species_interactions,                           | Dispersal, Demography  |
| 346             | 1        | Europe                               | NA                  | Field/RemoteSensing | Other_fish, S. salar | Marine                                 | Fisheries, Management, Predators           | Livelihood, Mortality                                    | Species_interactions, , Management              | Demography, Management |
| 347             | 2to5     | Northwest                            | Northwest_Columbia  | Field/RemoteSensing | O. kisutch           | Juvenile, Outmigration                 | Habitat                                    | Growth, Life_history                                     | Environment,                                    | Demography, Physiology |
| 348             | 1        | South_America                        | NA                  | Lab/Experimental    | O. mykiss            | Evolution                              | Temperature_FW                             | Performance, Physiology_Condition, Population_resilience | Environment,                                    | Demography, Physiology |
| 349             | 1        | South_America                        | NA                  | Lab/Experimental    | O. mykiss            | Evolution                              | Temperature_FW                             | Performance, Physiology_Condition                        | Environment,                                    | Physiology             |
| 350             | 1        | South_America                        | NA                  | Lab/Experimental    | O. mykiss            | Egg                                    | Genetics, Temperature_FW                   | Genetics_Adaptation, Mortality, Phenology                | Evolution, Environment,                         | Demography, Evolution  |
| 351             | 1        | Europe                               | NA                  | Lab/Experimental    | Other_species        | Marine                                 | Disease, Temperature_marine                | NA                                                       | Species_interactions, Environment,              | NA                     |

| Citation number | Duration | Region           | Subregion               | Type of study                                  | Species                              | Life stage                                                        | Driver                                                | Response                                   | Driver Process            | Response Process                  |
|-----------------|----------|------------------|-------------------------|------------------------------------------------|--------------------------------------|-------------------------------------------------------------------|-------------------------------------------------------|--------------------------------------------|---------------------------|-----------------------------------|
| 352             | 1        | British_Columbia | British_Columbia_Fraser | Lab/Experimental                               | O. nerka                             | Upmigration                                                       | Temperature_FW                                        | Behaviour, Mortality, Physiology_Condition | Environment,              | Dispersal, Demography, Physiology |
| 353             | NA       | NA               | NA                      | Review/MetaAnalysis                            | General                              | Evolution, Juvenile, Marine, Upmigration                          | Genetics, Temperature_FW                              | Genetics_Adaptation, Growth, Maturation    | Evolution, Environment,   | Evolution, Physiology             |
| 354             | NA       | Northwest        | Northwest_Columbia      | Model                                          | O. tshawytscha                       | Population                                                        | Environment, Flow, Temperature_FW, Temperature_marine | Life_history, Productivity                 | Environment,              | Demography                        |
| 355             | NA       | Northwest        | Northwest_Columbia      | Model, Projections/salmon, Review/MetaAnalysis | O. tshawytscha                       | Juvenile, Marine, Outmigration, Population, Spawning, Upmigration | Environment, Flow, Temperature_FW, Temperature_marine | Population_resilience, Productivity        | Environment,              | Demography                        |
| 356             | 6to10    | Northwest        | Northwest_Columbia      | Field/RemoteSensing                            | O. tshawytscha                       | Upmigration                                                       | Flow, Temperature_FW                                  | Mortality, Phenology                       | Environment,              | Demography                        |
| 357             | 10plus   | Northwest        | Northwest_Columbia      | Field/RemoteSensing                            | O. mykiss                            | Upmigration                                                       | Flow, Habitat, Management, Temperature_FW             | Behaviour, Habitat_Distribution, Mortality | Environment, , Management | Dispersal, Demography             |
| 358             | 10plus   | Northwest        | Northwest_Columbia      | Field/RemoteSensing                            | O. nerka                             | Upmigration                                                       | Flow, Temperature_FW                                  | Phenology                                  | Environment,              | Demography                        |
| 359             | NA       | Largescale       | NA                      | Projections/salmon, Review/MetaAnalysis        | O. kisutch, O. nerka, O. tshawytscha | Population                                                        | Acidity, Habitat, Temperature_FW, Temperature_marine  | Population_resilience                      | Environment,              | Demography                        |
| 360             | 10plus   | Northwest        | Northwest_Columbia      | Field/RemoteSensing, Model                     | O. tshawytscha                       | Upmigration                                                       | Flow, Temperature_FW                                  | Behaviour, Mortality                       | Environment,              | Dispersal, Demography             |

| Citation number | Duration | Region                     | Subregion               | Type of study              | Species        | Life stage                   | Driver                                               | Response                                      | Driver Process                     | Response Process                  |
|-----------------|----------|----------------------------|-------------------------|----------------------------|----------------|------------------------------|------------------------------------------------------|-----------------------------------------------|------------------------------------|-----------------------------------|
| 361             | 6to10    | Northwest                  | Northwest_Columbia      | Field/RemoteSensing        | O. nerka       | Upmigration                  | Flow, Management, Temperature_FW                     | Behaviour, Carryover, Mortality               | Environment, , Management          | Dispersal, Demography             |
| 362             | 10plus   | Northwest                  | Northwest_Columbia      | Field/RemoteSensing        | O. tshawytscha | Juvenile                     | Density_Food, Temperature_FW                         | Growth                                        | Species_interactions, Environment, | Physiology                        |
| 363             | 10plus   | British_Columbia           | British_Columbia_Fraser | Field/RemoteSensing, Model | O. nerka       | Upmigration                  | Fisheries, Flow, Management, Methods, Temperature_FW | Mortality                                     | Environment, , Management          | Demography                        |
| 364             | 10plus   | Alaska                     | Alaska_W                | Field/RemoteSensing        | O. tshawytscha | Juvenile, Marine, Population | Density_Food, Environment, Flow, Temperature_marine  | Mortality, Productivity                       | Species_interactions, Environment, | Demography                        |
| 365             | 10plus   | Largescale                 | NA                      | Field/RemoteSensing, Model | General        | Juvenile, Marine             | Fisheries, Management                                | Productivity                                  | , Management                       | Demography                        |
| 366             | 10plus   | Europe                     | NA                      | Field/RemoteSensing        | S. salar       | Evolution                    | Genetics                                             | Genetics_Adaptation, Maturation               | Evolution,                         | Evolution, Physiology             |
| 367             | 2to5     | Europe                     | NA                      | Lab/Experimental           | O. mykiss      | Spawning                     | Genetics                                             | Genetics_Adaptation, Morphology, Productivity | Evolution,                         | Demography, Evolution, Physiology |
| 368             | 10plus   | East_North_America, Europe | NA                      | Field/RemoteSensing        | S. salar       | Marine, Population           | Climate_indices, Fisheries, Management               | Habitat_Distribution, Mortality, Productivity | Environment, , Management          | Dispersal, Demography             |
| 369             | 10plus   | California                 | California_S            | Review/MetaAnalysis        | O. mykiss      | Population                   | Management                                           | Population_resilience, Productivity           | , Management                       | Demography                        |
| 370             | 10plus   | Northwest                  | NA                      | Field/RemoteSensing        | O. tshawytscha | Marine                       | Climate_indices, Density_Food, Ecosystem, Prey       | Growth, Mortality                             | Species_interactions, Environment, | Demography, Physiology            |
| 371             | 1        | East_North_America         | NA                      | Lab/Experimental           | O. tshawytscha | Egg, Juvenile, Upmigration   | Contaminants                                         | Carryover                                     | Environment,                       | Demography                        |

| Citation number | Duration | Region             | Subregion             | Type of study                                  | Species                    | Life stage                     | Driver                                                               | Response                                      | Driver Process                     | Response Process                             |
|-----------------|----------|--------------------|-----------------------|------------------------------------------------|----------------------------|--------------------------------|----------------------------------------------------------------------|-----------------------------------------------|------------------------------------|----------------------------------------------|
| 372             | NA       | East_North_America | NA                    | Field/RemoteSensing                            | Other_fish                 | Population                     | Environment, Fisheries, Genetics, Temperature_FW, Temperature_marine | Genetics_Adaptation, Habitat_Distribution     | Evolution, Environment, Management | Dispersal, Evolution                         |
| 373             | 10plus   | Northwest          | Northwest_Coastal     | Field/RemoteSensing                            | O. tshawytscha             | Marine                         | Density_Food, Temperature_marine                                     | Diet, Growth, Mortality                       | Species_interactions, Environment, | Species_interactions, Demography, Physiology |
| 374             | 10plus   | Northwest          | Northwest_Columbia    | Field/RemoteSensing                            | O. mykiss                  | Juvenile, Marine, Outmigration | Density_Food, Habitat                                                | Diet, Growth                                  | Species_interactions, Environment, | Species_interactions, Physiology             |
| 375             | 10plus   | Northwest          | Northwest_Coastal     | Field/RemoteSensing                            | O. tshawytscha             | Marine                         | Density_Food                                                         | Diet, Growth, Mortality, Physiology_Condition | Species_interactions,              | Species_interactions, Demography, Physiology |
| 376             | 10plus   | Northwest          | Northwest_Coastal     | Field/RemoteSensing                            | O. kisutch, O. tshawytscha | Marine                         | Density_Food                                                         | Diet, Mortality                               | Species_interactions,              | Species_interactions, Demography             |
| 377             | NA       | Largescale         | NA                    | Review/MetaAnalysis                            | General                    | Marine                         | Disease                                                              | Immune                                        | Species_interactions,              | Physiology                                   |
| 378             | 2to5     | Europe             | NA                    | Field/RemoteSensing                            | S. salar                   | Juvenile                       | Habitat, Management                                                  | Behaviour, Habitat_Distribution               | Environment, Management            | Dispersal                                    |
| 379             | 6to10    | East_North_America | NA                    | Field/RemoteSensing                            | S. salar                   | Juvenile                       | Density_Food, Flow, Temperature_FW                                   | Growth                                        | Species_interactions, Environment, | Physiology                                   |
| 380             | NA       | NA                 | NA                    | Review/MetaAnalysis                            | General                    | Evolution                      | Habitat                                                              | Genetics_Adaptation                           | Environment,                       | Evolution                                    |
| 381             | 2to5     | Northwest          | Northwest_Puget_Sound | Field/RemoteSensing                            | O. tshawytscha             | Outmigration                   | Density_Food, Habitat                                                | Growth                                        | Species_interactions, Environment, | Physiology                                   |
| 382             | 2to5     | California         | California_CV         | Field/RemoteSensing                            | O. tshawytscha             | Juvenile, Outmigration         | Density_Food, Habitat                                                | Growth                                        | Species_interactions, Environment, | Physiology                                   |
| 383             | 2to5     | Northwest          | Northwest_Puget_Sound | Field/RemoteSensing, Model, Projections/salmon | O. tshawytscha             | Outmigration                   | Habitat, Prey, Temperature_FW                                        | Growth, Physiology_Condition                  | Species_interactions, Environment, | Physiology                                   |

| Citation number | Duration | Region           | Subregion                                   | Type of study                     | Species                                     | Life stage         | Driver                                                      | Response                                                | Driver Process                                   | Response Process                        |
|-----------------|----------|------------------|---------------------------------------------|-----------------------------------|---------------------------------------------|--------------------|-------------------------------------------------------------|---------------------------------------------------------|--------------------------------------------------|-----------------------------------------|
| 384             | 2to5     | Europe           | NA                                          | Field/<br>RemoteSensing           | S. salar                                    | Juvenile           | Ecosystem,<br>Habitat, Prey                                 | NA                                                      | Species_interactions, NA<br>Environment,         |                                         |
| 385             | 2to5     | Europe           | NA                                          | Lab/<br>Experimental              | S. salar                                    | Evolution          | Disease                                                     | Genetics_Adaptation,<br>Physiology_Condition            | Species_interactions, Evolution,<br>Physiology   |                                         |
| 386             | NA       | Northwest        | Northwest_Columbia                          | Projections/<br>salmon            | O. kisutch, O.<br>mykiss, O.<br>tshawytscha | Freshwater_habitat | Contaminants,<br>Flow, Habitat,<br>Temperature_<br>FW       | Habitat_Distribution,<br>Population_resilience          | Environment,                                     | Dispersal,<br>Demography                |
| 387             | 10plus   | British_Columbia | British_Columbia_not_Fraser                 | Field/<br>RemoteSensing           | O. keta                                     | Marine             | Climate_indices,<br>Density_Food,<br>Temperature_<br>marine | Growth, Maturation                                      | Species_interactions, Physiology<br>Environment, |                                         |
| 388             | 1        | Europe           | NA                                          | Lab/<br>Experimental              | S. salar                                    | Juvenile           | Genetics,<br>Temperature_<br>FW                             | Genetics_Adaptation,<br>Growth,<br>Physiology_Condition | Evolution,<br>Environment,                       | Evolution,<br>Physiology                |
| 389             | 2to5     | Europe           | NA                                          | Field/<br>RemoteSensing           | S. salar                                    | Juvenile           | Genetics,<br>Temperature_<br>FW                             | Genetics_Adaptation,<br>Growth, Phenology               | Evolution,<br>Environment,                       | Demography,<br>Evolution,<br>Physiology |
| 390             | 6to10    | Alaska           | Alaska_W                                    | Field/<br>RemoteSensing           | O. nerka                                    | Upmigration        | Fisheries,<br>Genetics,<br>Management                       | NA                                                      | Evolution, ,<br>Management                       | NA                                      |
| 391             | 10plus   | Northwest        | Northwest_Coastal,<br>Northwest_Puget_Sound | Field/<br>RemoteSensing,<br>Model | O. kisutch                                  | Population         | Density_Food,<br>Fisheries                                  | Life_history, Mortality,<br>Productivity                | Species_interactions, Demography<br>, Management |                                         |
| 392             | 6to10    | California       | California_N                                | Field/<br>RemoteSensing           | Salmonid_<br>general                        | Juvenile           | Flow, Habitat                                               | Habitat_Distribution                                    | Environment,                                     | Dispersal                               |
| 393             | 1        | California       | California_CV                               | Lab/<br>Experimental              | O. tshawytscha                              | Egg, Juvenile      | Dissolved_oxygen,<br>Temperature_<br>FW                     | Growth, Mortality,<br>Physiology_Condition              | Environment,                                     | Demography,<br>Physiology               |
| 394             | 1        | California       | California_CV                               | Lab/<br>Experimental              | O. tshawytscha                              | Egg, Juvenile      | Dissolved_oxygen,<br>Temperature_<br>FW                     | Carryover,<br>Performance,<br>Physiology_Condition      | Environment,                                     | Demography,<br>Physiology               |



| Citation number | Duration | Region             | Subregion             | Type of study                         | Species                   | Life stage                                          | Driver                                           | Response                                                      | Driver Process                     | Response Process                  |
|-----------------|----------|--------------------|-----------------------|---------------------------------------|---------------------------|-----------------------------------------------------|--------------------------------------------------|---------------------------------------------------------------|------------------------------------|-----------------------------------|
| 395             | 10plus   | East_North_America | NA                    | Field/RemoteSensing                   | S. salar                  | Upmigration                                         | Density_Food, Temperature_FW, Temperature_marine | Phenology                                                     | Species_interactions, Environment, | Demography                        |
| 396             | 1        | Northwest          | Northwest_Columbia    | Field/RemoteSensing                   | O. tshawytscha            | Outmigration                                        | Management, Methods                              | Mortality                                                     | , Management                       | Demography                        |
| 397             | 1        | Europe             | NA                    | Field/RemoteSensing, Lab/Experimental | S. trutta                 | Juvenile, Outmigration                              | Predators, Temperature_FW                        | Behaviour, Growth, Mortality, Phenology, Physiology_Condition | Species_interactions, Environment, | Dispersal, Demography, Physiology |
| 398             | NA       | Northwest          | Northwest_Columbia    | Model                                 | O. mykiss, O. tshawytscha | Freshwater_habitat, Juvenile, Spawning, Upmigration | Flow, Management                                 | NA                                                            | Environment, , Management          | NA                                |
| 399             | 6to10    | Northwest          | Northwest_Columbia    | Field/RemoteSensing                   | Other_species             | Juvenile                                            | Ecosystem, Invasives                             | NA                                                            | Species_interactions,              | NA                                |
| 400             | 1        | Northwest          | Northwest_Coastal     | Lab/Experimental                      | O. tshawytscha            | Juvenile                                            | Contaminants, Temperature_FW                     | NA                                                            | Environment,                       | NA                                |
| 401             | 1        | Europe             | NA                    | Lab/Experimental                      | O. mykiss                 | Juvenile                                            | Temperature_FW                                   | Performance, Physiology_Condition                             | Environment,                       | Physiology                        |
| 402             | 1        | East_North_America | NA                    | Field/RemoteSensing                   | S. salar                  | Evolution                                           | Disease, Habitat, Temperature_FW                 | Genetics_Adaptation                                           | Species_interactions, Environment, | Evolution                         |
| 403             | 10plus   | Northwest          | Northwest_Columbia    | Field/RemoteSensing                   | Salmonid_general          | Freshwater_habitat                                  | Climate_indices, Flow                            | Population_resilience                                         | Environment,                       | Demography                        |
| 404             | 2to5     | East_North_America | NA                    | Field/RemoteSensing                   | S. salar                  | Marine, Outmigration                                | Climate_indices, Prey                            | Growth                                                        | Species_interactions, Environment, | Physiology                        |
| 405             | 1        | Largescale         | NA                    | Lab/Experimental                      | General, Other_fish       | Marine                                              | Acidity                                          | Performance                                                   | Environment,                       | Physiology                        |
| 406             | 1        | Northwest          | Northwest_Puget_Sound | Lab/Experimental                      | O. mykiss                 | Juvenile                                            | Temperature_FW                                   | Growth, Life_history                                          | Environment,                       | Demography, Physiology            |
| 407             | 2to5     | Europe             | NA                    | Field/RemoteSensing, Model            | S. trutta                 | Population                                          | Fisheries, Methods, Temperature_FW               | Habitat_Distribution, Mortality, Productivity                 | Environment, , Management          | Dispersal, Demography             |

| Citation number | Duration | Region           | Subregion               | Type of study                                                                    | Species                                         | Life stage            | Driver                                              | Response                                      | Driver Process                        | Response Process                        |
|-----------------|----------|------------------|-------------------------|----------------------------------------------------------------------------------|-------------------------------------------------|-----------------------|-----------------------------------------------------|-----------------------------------------------|---------------------------------------|-----------------------------------------|
| 408             | 10plus   | Europe           | NA                      | Field/<br>RemoteSensing                                                          | S. salar, S. trutta                             | Juvenile              | Habitat                                             | Habitat_Distribution                          | Environment,                          | Dispersal                               |
| 409             | 1        | British_Columbia | British_Columbia_Fraser | Field/<br>RemoteSensing                                                          | O. nerka                                        | Upmigration           | NA                                                  | Behaviour, Mortality,<br>Physiology_Condition |                                       | Dispersal,<br>Demography,<br>Physiology |
| 410             | NA       | NA               | NA                      | Review/<br>MetaAnalysis                                                          | General                                         | General               | Acidity,<br>Ecosystem                               | Livelihood                                    | Species_interactions,<br>Environment, | Management                              |
| 411             | 10plus   | Largescale       | NA                      | Field/<br>RemoteSensing,<br>Projections/<br>physical,<br>Review/<br>MetaAnalysis | General                                         | Marine                | Acidity,<br>Dissolved_oxygen,<br>Temperature_marine | NA                                            | Environment,                          | NA                                      |
| 412             | NA       | Largescale       | NA                      | Review/<br>MetaAnalysis                                                          | General                                         | Marine                | Acidity,<br>Ecosystem,<br>Temperature_FW            | NA                                            | Species_interactions,<br>Environment, | NA                                      |
| 413             | NA       | Northwest        | Northwest_Columbia      | Projections/<br>salmon                                                           | O. kisutch, O. mykiss, O. nerka, O. tshawytscha | Upmigration           | Flow, Habitat                                       | Population_resilience                         | Environment,                          | Demography                              |
| 414             | 1        | Alaska           | Alaska_W                | Field/<br>RemoteSensing,<br>Lab/<br>Experimental                                 | O. tshawytscha                                  | Upmigration           | Methods,<br>Temperature_FW                          | Performance                                   | Environment,                          | Physiology                              |
| 415             | NA       | Largescale       | NA                      | Field/<br>RemoteSensing,<br>Model                                                | O. nerka                                        | Marine,<br>Population | Climate_indices,<br>Temperature_marine              | Productivity                                  | Environment,                          | Demography                              |
| 416             | 10plus   | Largescale       | NA                      | Field/<br>RemoteSensing                                                          | O. tshawytscha                                  | Marine,<br>Population | Climate_indices                                     | Productivity                                  | Environment,                          | Demography                              |
| 417             | 10plus   | Alaska           | Alaska_S                | Field/<br>RemoteSensing                                                          | O. gorbuscha                                    | Marine                | Prey                                                | Mortality                                     | Species_interactions,                 | Demography                              |
| 418             | NA       | Northwest        | Northwest_Columbia      | Review/<br>MetaAnalysis                                                          | General                                         | General               | Management, Methods                                 | Livelihood                                    | , Management                          | Management                              |
| 419             | NA       | Largescale       | NA                      | Projections/<br>ecosystem,<br>Review/<br>MetaAnalysis                            | General                                         | Marine                | Ecosystem,<br>Environment,<br>Methods               | NA                                            | Species_interactions,<br>Environment, | NA                                      |

| Citation number | Duration | Region                | Subregion                       | Type of study       | Species                           | Life stage         | Driver                                                   | Response                                    | Driver Process                     | Response Process                 |
|-----------------|----------|-----------------------|---------------------------------|---------------------|-----------------------------------|--------------------|----------------------------------------------------------|---------------------------------------------|------------------------------------|----------------------------------|
| 420             | 2to5     | British_Columbia      | British_Columbia_Fraser         | Field/RemoteSensing | O. nerka                          | Marine             | Temperature_marine                                       | Behaviour                                   | Environment,                       | Dispersal                        |
| 421             | 1        | Mountain_west         | NA                              | Field/RemoteSensing | O. clarkii                        | Egg                | Habitat, Temperature_FW                                  | Mortality, Performance                      | Environment,                       | Demography, Physiology           |
| 422             | 1        | Europe                | NA                              | Field/RemoteSensing | S. salar, S. trutta               | Juvenile           | Habitat                                                  | Morphology                                  | Environment,                       | Physiology                       |
| 423             | 6to10    | California, Northwest | California_N, Northwest_Coastal | Field/RemoteSensing | Other_species                     | Marine             | Climate_indices, Density_Food, Ecosystem, Temperature_FW | NA                                          | Species_interactions, Environment, | NA                               |
| 424             | NA       | California            | California_CV                   | Model               | O. tshawytscha                    | Egg, Population    | Density_Food, Flow, Habitat, Temperature_FW              | Phenology, Productivity                     | Species_interactions, Environment, | Demography                       |
| 425             | 1        | Northwest             | Northwest_Columbia              | Field/RemoteSensing | O. tshawytscha                    | Spawning           | Habitat, Methods                                         | Habitat_Distribution                        | Environment,                       | Dispersal                        |
| 426             | 6to10    | Northwest             | Northwest_Puget_Sound           | Field/RemoteSensing | O. tshawytscha                    | Marine             | Prey                                                     | Diet, Growth                                | Species_interactions,              | Species_interactions, Physiology |
| 427             | 1        | British_Columbia      | British_Columbia_not_Fraser     | Field/RemoteSensing | O. tshawytscha                    | Marine             | Habitat, Prey                                            | Habitat_Distribution                        | Species_interactions, Environment, | Dispersal                        |
| 428             | 10plus   | Northwest             | Northwest_Columbia              | Field/RemoteSensing | O. mykiss                         | Freshwater_habitat | Habitat, Temperature_FW                                  | Habitat_Distribution, Population_resilience | Environment,                       | Dispersal, Demography            |
| 429             | 1        | Northwest             | Northwest_Columbia              | Lab/Experimental    | O. tshawytscha                    | Juvenile           | Density_Food, Management                                 | Growth, Habitat_Distribution                | Species_interactions, , Management | Dispersal, Physiology            |
| 430             | 2to5     | Europe                | NA                              | Field/RemoteSensing | O. gorbuscha, S. salar, S. trutta | Juvenile           | Density_Food, Invasives                                  | Carryover, Growth                           | Species_interactions,              | Demography, Physiology           |
| 431             | 1        | East_North_America    | NA                              | Lab/Experimental    | S. fontinalis                     | Juvenile           | Temperature_FW                                           | Performance, Physiology_Condition           | Environment,                       | Physiology                       |
| 432             | NA       | NA                    | NA                              | Theoretical/Opinion | General                           | Freshwater_habitat | Management, Temperature_FW                               | NA                                          | Environment, , Management          | NA                               |

| Citation number | Duration | Region             | Subregion               | Type of study                                    | Species                                            | Life stage                | Driver                                  | Response                                                     | Driver Process                        | Response Process                        |
|-----------------|----------|--------------------|-------------------------|--------------------------------------------------|----------------------------------------------------|---------------------------|-----------------------------------------|--------------------------------------------------------------|---------------------------------------|-----------------------------------------|
| 433             | 1        | Europe             | NA                      | Lab/<br>Experimental                             | Other_species                                      | Marine                    | Acidity,<br>Ecosystem,<br>Environment   | NA                                                           | Species_interactions,<br>Environment, | NA                                      |
| 434             | 1        | Alaska             | Alaska_SE               | Field/<br>RemoteSensing                          | O. tshawytscha                                     | Marine                    | NA                                      | Behaviour                                                    |                                       | Dispersal                               |
| 435             | NA       | British_Columbia   | British_Columbia_Fraser | Review/<br>MetaAnalysis                          | O. gorbuscha, O. kisutch, O. nerka, O. tshawytscha | Juvenile,<br>Upmigration  | Flow,<br>Temperature_<br>FW             | Performance,<br>Physiology_Condition                         | Environment,                          | Physiology                              |
| 436             | 1        | British_Columbia   | British_Columbia_Fraser | Field/<br>RemoteSensing,<br>Lab/<br>Experimental | O. nerka                                           | Upmigration               | Fisheries                               | Behaviour, Mortality,<br>Physiology_Condition                | , Management                          | Dispersal,<br>Demography,<br>Physiology |
| 437             | 1        | Northwest          | British_Columbia_Fraser | Lab/<br>Experimental                             | O. nerka                                           | Juvenile                  | Habitat,<br>Temperature_<br>FW          | NA                                                           | Environment,                          | NA                                      |
| 438             | 1        | Northwest          | British_Columbia_Fraser | Lab/<br>Experimental                             | O. nerka                                           | Evolution,<br>Upmigration | Flow, Habitat,<br>Temperature_<br>FW    | Genetics_Adaptation,<br>Performance,<br>Physiology_Condition | Environment,                          | Evolution,<br>Physiology                |
| 439             | 10plus   | Northwest          | British_Columbia_Fraser | Field/<br>RemoteSensing,<br>Lab/<br>Experimental | O. nerka                                           | Upmigration               | Temperature_<br>FW                      | Performance,<br>Physiology_Condition                         | Environment,                          | Physiology                              |
| 440             | 2to5     | Northwest          | British_Columbia_Fraser | Field/<br>RemoteSensing,<br>Lab/<br>Experimental | O. nerka                                           | Juvenile,<br>Upmigration  | Flow,<br>Temperature_<br>FW             | Performance,<br>Physiology_Condition                         | Environment,                          | Physiology                              |
| 441             | 2to5     | British_Columbia   | NA                      | Field/<br>RemoteSensing                          | Other_species                                      | Juvenile,<br>Upmigration  | Contaminants                            | NA                                                           | Environment,                          | NA                                      |
| 442             | 10plus   | Europe             | NA                      | Model, Review/<br>MetaAnalysis                   | S. salar, S. trutta                                | Egg, Juvenile             | Climate_indices,<br>Temperature_<br>FW  | Growth, Performance,<br>Phenology                            | Environment,                          | Demography,<br>Physiology               |
| 443             | 1        | East_North_America | NA                      | Lab/<br>Experimental                             | S. fontinalis                                      | Juvenile                  | Dissolved_oxygen,<br>Temperature_<br>FW | Performance                                                  | Environment,                          | Physiology                              |
| 444             | 2to5     | Northwest          | Northwest_Columbia      | Field/<br>RemoteSensing                          | Other_species                                      | Juvenile                  | Ecosystem,<br>Invasives                 | NA                                                           | Species_interactions,                 | NA                                      |

| Citation number | Duration | Region                              | Subregion                                                                      | Type of study              | Species                                       | Life stage                         | Driver                                            | Response                                        | Driver Process                                  | Response Process                            |
|-----------------|----------|-------------------------------------|--------------------------------------------------------------------------------|----------------------------|-----------------------------------------------|------------------------------------|---------------------------------------------------|-------------------------------------------------|-------------------------------------------------|---------------------------------------------|
| 445             | 6to10    | Northwest                           | Northwest_Columbia                                                             | Field/RemoteSensing, Model | O. kisutch, O. tshawytscha                    | Marine                             | Density_Food, Flow, Predators                     | Mortality                                       | Species_interactions, Environment,              | Demography                                  |
| 446             | 6to10    | Northwest                           | Northwest_Columbia                                                             | Field/RemoteSensing        | O. keta, O. kisutch, O. nerka, O. tshawytscha | Marine                             | Density_Food, Predators                           | Mortality                                       | Species_interactions,                           | Demography                                  |
| 447             | 1        | Europe                              | NA                                                                             | Lab/Experimental           | S. trutta                                     | Juvenile                           | Density_Food, Habitat                             | Behaviour, Growth, Habitat_Distribution         | Species_interactions, Environment,              | Dispersal, Physiology                       |
| 448             | 10plus   | Europe                              | NA                                                                             | Field/RemoteSensing        | S. salar                                      | Marine                             | Fisheries                                         | Life_history, Maturation, Population_resilience | , Management                                    | Demography, Physiology                      |
| 449             | 1        | Europe                              | NA                                                                             | Lab/Experimental           | S. salar                                      | Juvenile, Spawning                 | Management                                        | Behaviour, Performance                          | , Management                                    | Dispersal, Physiology                       |
| 450             | NA       | California                          | California_CV                                                                  | Model                      | O. tshawytscha                                | Spawning                           | Flow, Habitat                                     | Habitat_Distribution                            | Environment,                                    | Dispersal                                   |
| 451             | 2to5     | Northwest                           | Northwest_Puget_Sound                                                          | Field/RemoteSensing        | Other_species                                 | Marine                             | Ecosystem, Environment, Management                | NA                                              | Species_interactions, Environment, , Management | NA                                          |
| 452             | 10plus   | Alaska, British_Columbia, Northwest | Alaska_S, Alaska_SE, Alaska_W, British_Columbia_not_Fraser, Northwest_Columbia | Field/RemoteSensing        | O. nerka                                      | Marine                             | Methods                                           | Habitat_Distribution                            |                                                 | Dispersal                                   |
| 453             | 10plus   | British_Columbia                    | British_Columbia_not_Fraser                                                    | Field/RemoteSensing        | O. nerka                                      | Marine                             | Climate_indices, Density_Food, Temperature_marine | Diet, Growth, Habitat_Distribution              | Species_interactions, Environment,              | Species_interactions, Dispersal, Physiology |
| 454             | NA       | Northwest                           | Northwest_Puget_Sound                                                          | Model                      | O. kisutch                                    | Freshwater_habitat                 | Habitat, Methods, Restoration                     | Population_resilience                           | Environment, , Management                       | Demography                                  |
| 455             | 10plus   | Northwest                           | Northwest_Columbia                                                             | Field/RemoteSensing        | O. nerka                                      | Juvenile                           | Ecosystem                                         | Productivity                                    | Species_interactions,                           | Demography                                  |
| 456             | 1        | British_Columbia                    | British_Columbia_not_Fraser                                                    | Field/RemoteSensing        | O. tshawytscha                                | Egg, Evolution, Juvenile, Spawning | Genetics, Habitat                                 | Genetics_Adaptation, Growth, Mortality          | Evolution, Environment,                         | Demography, Evolution, Physiology           |

| Citation number | Duration | Region                               | Subregion               | Type of study              | Species                         | Life stage                                        | Driver                                    | Response                                    | Driver Process                     | Response Process       |
|-----------------|----------|--------------------------------------|-------------------------|----------------------------|---------------------------------|---------------------------------------------------|-------------------------------------------|---------------------------------------------|------------------------------------|------------------------|
| 457             | 1        | British_Columbia                     | British_Columbia_Fraser | Field/RemoteSensing        | O. nerka                        | Upmigration                                       | Temperature_FW                            | Mortality, Physiology_Condition             | Environment,                       | Demography, Physiology |
| 458             | 1        | Northwest                            | Northwest_Puget_Sound   | Lab/Experimental           | O. tshawytscha                  | Evolution                                         | Genetics, Temperature_FW                  | Growth, Morphology                          | Evolution, Environment,            | Physiology             |
| 459             | 1        | Europe                               | NA                      | Field/RemoteSensing        | O. mykiss                       | Juvenile                                          | Disease, Genetics                         | Immune                                      | Species_interactions, Evolution,   | Physiology             |
| 460             | 2to5     | Europe                               | NA                      | Model                      | Salmonid_general                | Freshwater_habitat                                | Flow, Temperature_FW                      | Performance                                 | Environment,                       | Physiology             |
| 461             | 10plus   | Europe                               | NA                      | Field/RemoteSensing, Model | S. salar                        | Juvenile                                          | Flow, Habitat                             | Habitat_Distribution                        | Environment,                       | Dispersal              |
| 462             | NA       | California, Mountain_west, Northwest | Northwest_Columbia      | Field/RemoteSensing        | Other_species, Salmonid_general | Freshwater_habitat                                | Environment, Habitat                      | NA                                          | Environment,                       | NA                     |
| 463             | NA       | Northwest                            | Northwest_Columbia      | Model                      | S. confluentus                  | Freshwater_habitat, General, Juvenile, Population | Flow, Habitat, Management, Temperature_FW | Habitat_Distribution, Population_resilience | Environment, , Management          | Dispersal, Demography  |
| 464             | 1        | California                           | California_CV           | Lab/Experimental           | O. tshawytscha                  | Juvenile                                          | Environment, Habitat                      | Habitat_Distribution                        | Environment,                       | Dispersal              |
| 465             | 6to10    | Alaska                               | Alaska_W                | Field/RemoteSensing        | O. nerka                        | Marine                                            | Density_Food, Temperature_marine          | Growth, Mortality, Physiology_Condition     | Species_interactions, Environment, | Demography, Physiology |
| 466             | NA       | East_North_America                   | NA                      | Review/MetaAnalysis        | General                         | Freshwater_habitat, Juvenile, Outmigration        | Environment, Habitat                      | NA                                          | Environment,                       | NA                     |
| 467             | NA       | British_Columbia                     | NA                      | Theoretical/Opinion        | O. nerka, Salmonid_general      | Upmigration                                       | Dissolved_oxygen, Temperature_FW          | Performance, Physiology_Condition           | Environment,                       | Physiology             |
| 468             | NA       | NA                                   | NA                      | Theoretical/Opinion        | General                         | Juvenile                                          | Dissolved_oxygen, Temperature_FW          | Performance, Physiology_Condition           | Environment,                       | Physiology             |

| Citation number | Duration | Region                | Subregion               | Type of study                         | Species                                                     | Life stage            | Driver                               | Response                                           | Driver Process        | Response Process       |
|-----------------|----------|-----------------------|-------------------------|---------------------------------------|-------------------------------------------------------------|-----------------------|--------------------------------------|----------------------------------------------------|-----------------------|------------------------|
| 469             | 10plus   | British_Columbia      | British_Columbia_Fraser | Field/RemoteSensing                   | O. keta                                                     | Spawning              | Dissolved_oxygen, Temperature_FW     | Mortality, Performance, Population_resilience      | Environment,          | Demography, Physiology |
| 470             | 1        | Australia_New Zealand | NA                      | Lab/Experimental                      | S. fontinalis                                               | Juvenile              | Environment                          | Maturation, Physiology_Condition                   | Environment,          | Physiology             |
| 471             | NA       | NA                    | NA                      | Model, Review/MetaAnalysis            | O. kisutch, S. confluentus, S. fontinalis, Salmonid_general | Juvenile              | Density_Food                         | Behaviour                                          | Species_interactions, | Dispersal              |
| 472             | 2to5     | Northwest             | Northwest_Columbia      | Field/RemoteSensing                   | O. tshawytscha                                              | Juvenile              | Environment, Habitat, Temperature_FW | Habitat_Distribution                               | Environment,          | Dispersal              |
| 473             | 2to5     | Northwest             | Northwest_Columbia      | Field/RemoteSensing                   | O. tshawytscha                                              | Juvenile              | Flow, Habitat                        | Habitat_Distribution                               | Environment,          | Dispersal              |
| 474             | 10plus   | Largescale            | NA                      | Field/RemoteSensing                   | General                                                     | Marine                | Ecosystem, Methods, Predators        | NA                                                 | Species_interactions, | NA                     |
| 475             | 10plus   | Alaska                | Alaska_W                | Field/RemoteSensing                   | O. nerka                                                    | Marine                | Fisheries                            | Life_history, Mortality                            | , Management          | Demography             |
| 476             | 2to5     | Northwest             | Northwest_Columbia      | Field/RemoteSensing                   | O. mykiss                                                   | Upmigration           | Fisheries                            | Behaviour, Mortality                               | , Management          | Dispersal, Demography  |
| 477             | 10plus   | Northwest             | Northwest_Puget_Sound   | Field/RemoteSensing                   | O. kisutch                                                  | Spawning, Upmigration | Contaminants, Habitat                | Mortality, Performance                             | Environment,          | Demography, Physiology |
| 478             | 1        | Northwest             | Northwest_Columbia      | Field/RemoteSensing, Lab/Experimental | O. mykiss                                                   | Juvenile, Upmigration | Habitat, Temperature_FW              | Growth, Habitat_Distribution, Physiology_Condition | Environment,          | Dispersal, Physiology  |
| 479             | 1        | Alaska                | Alaska_SE               | Field/RemoteSensing                   | O. gorbuscha, O. keta, O. kisutch                           | Spawning              | Dissolved_oxygen, Temperature_FW     | Mortality, Performance                             | Environment,          | Demography, Physiology |
| 480             | 1        | Europe                | NA                      | Lab/Experimental                      | S. trutta                                                   | Juvenile              | Flow                                 | Morphology                                         | Environment,          | Physiology             |
| 481             | 1        | Europe                | NA                      | Lab/Experimental                      | S. trutta                                                   | Spawning              | Temperature_FW                       | Morphology                                         | Environment,          | Physiology             |

| Citation number | Duration | Region                | Subregion                                     | Type of study                                     | Species                                     | Life stage         | Driver                                | Response                                    | Driver Process        | Response Process        |
|-----------------|----------|-----------------------|-----------------------------------------------|---------------------------------------------------|---------------------------------------------|--------------------|---------------------------------------|---------------------------------------------|-----------------------|-------------------------|
| 482             | 1        | Northwest             | Northwest_Coastal                             | Field/RemoteSensing                               | O. kisutch                                  | Marine             | Prey                                  | NA                                          | Species_interactions, | NA                      |
| 483             | 1        | Alaska                | Alaska_SE                                     | Field/RemoteSensing                               | O. keta                                     | Marine             | Density_Food                          | Growth, Physiology_Condition                | Species_interactions, | Physiology              |
| 484             | 2to5     | Alaska                | Alaska_SE                                     | Field/RemoteSensing                               | O. gorbuscha, O. keta, O. kisutch, O. nerka | Marine             | Environment, Prey, Temperature_marine | Growth, Physiology_Condition                | Species_interactions, | Physiology Environment, |
| 485             | NA       | East_North_America    | NA                                            | Review/MetaAnalysis                               | Other_fish, Salmonid_general                | Juvenile           | Density_Food, Temperature_FW          | Growth, Physiology_Condition                | Species_interactions, | Physiology Environment, |
| 486             | 10plus   | California, Northwest | California_N, California_S, Northwest_Coastal | Model                                             | Other_species                               | Marine             | Ecosystem, Environment                | NA                                          | Species_interactions, | NA Environment,         |
| 487             | 10plus   | California, Northwest | California_N, California_S, Northwest_Coastal | Field/RemoteSensing, Model                        | Other_species                               | Marine             | Density_Food, Ecosystem, Environment  | NA                                          | Species_interactions, | NA Environment,         |
| 488             | 10plus   | California            | California_N, California_S                    | Model                                             | Other_species                               | Marine             | Predators                             | NA                                          | Species_interactions, | NA                      |
| 489             | NA       | California, Northwest | California_N, California_S, Northwest_Coastal | Model                                             | Other_fish                                  | Marine             | Prey                                  | Habitat_Distribution                        | Species_interactions, | Dispersal               |
| 490             | 10plus   | California, Northwest | California_N, California_S, Northwest_Coastal | Field/RemoteSensing                               | Other_fish                                  | Marine             | Density_Food, Temperature_marine      | Habitat_Distribution                        | Species_interactions, | Dispersal Environment,  |
| 491             | 10plus   | Australia_New Zealand | NA                                            | Field/RemoteSensing, Model, Projections/ecosystem | Other_fish                                  | Marine             | Temperature_FW, Temperature_marine    | Habitat_Distribution                        | Environment,          | Dispersal               |
| 492             | 10plus   | Europe                | NA                                            | Projections/salmon                                | S. trutta                                   | Freshwater_habitat | Flow, Habitat, Temperature_FW         | Habitat_Distribution, Population_resilience | Environment,          | Dispersal, Demography   |
| 493             | 2to5     | Europe                | NA                                            | Field/RemoteSensing                               | S. trutta                                   | Population         | Genetics                              | Genetics_Adaptation, Habitat_Distribution   | Evolution,            | Dispersal, Evolution    |



| Citation number | Duration | Region                   | Subregion                                                                           | Type of study                                      | Species                                                              | Life stage    | Driver                                         | Response                              | Driver Process                                        | Response Process          |
|-----------------|----------|--------------------------|-------------------------------------------------------------------------------------|----------------------------------------------------|----------------------------------------------------------------------|---------------|------------------------------------------------|---------------------------------------|-------------------------------------------------------|---------------------------|
| 494             | 10plus   | Largescale               | NA                                                                                  | Field/<br>RemoteSensing                            | General                                                              | Population    | Climate_indice<br>s,<br>Temperature_<br>marine | Productivity                          | Environment,                                          | Demography                |
| 495             | 1        | Europe                   | NA                                                                                  | Lab/<br>Experimental                               | S. salar                                                             | Egg, Juvenile | Temperature_<br>FW                             | Growth                                | Environment,                                          | Physiology                |
| 496             | NA       | Europe                   | NA                                                                                  | Field/<br>RemoteSensing,<br>Projections/<br>salmon | Other_fish                                                           | Outmigration  | Density_Food,<br>Temperature_<br>FW            | Habitat_Distribution,<br>Life_history | Species_interactions,<br>Environment,                 | Dispersal,<br>Demography  |
| 497             | 2to5     | Europe                   | NA                                                                                  | Lab/<br>Experimental                               | S. salar                                                             | Juvenile      | Density_Food                                   | Behaviour                             | Species_interactions,                                 | Dispersal                 |
| 498             | 10plus   | East_North_A<br>merica   | NA                                                                                  | Field/<br>RemoteSensing                            | Other_species                                                        | Marine        | Ecosystem,<br>Predators                        | Mortality,<br>Physiology_Condition    | Species_interactions,                                 | Demography,<br>Physiology |
| 499             | 10plus   | Northwest                | Northwest_Col<br>umbia                                                              | Field/<br>RemoteSensing                            | O. kisutch                                                           | Marine        | Habitat                                        | Habitat_Distribution                  | Environment,                                          | Dispersal                 |
| 500             | 2to5     | Largescale               | NA                                                                                  | Field/<br>RemoteSensing                            | O. gorbuscha, O.<br>keta, O. kisutch,<br>O. nerka, O.<br>tshawytscha | Marine        | Habitat                                        | Habitat_Distribution                  | Environment,                                          | Dispersal                 |
| 501             | NA       | California,<br>Northwest | California_CV,<br>California_N,<br>Northwest_Co<br>astal,<br>Northwest_Col<br>umbia | Model,<br>Projections/<br>salmon                   | O. tshawytscha                                                       | Upmigration   | Habitat,<br>Management,<br>Temperature_<br>FW  | Physiology_Condition                  | Environment, ,<br>Management                          | Physiology                |
| 502             | 1        | Japan                    | NA                                                                                  | Lab/<br>Experimental                               | O. masou,<br>Other_fish                                              | Egg           | Methods                                        | Phenology                             |                                                       | Demography                |
| 503             | 1        | Europe                   | NA                                                                                  | Lab/<br>Experimental                               | S. salar                                                             | Marine        | Acidity                                        | Mortality                             | Environment,                                          | Demography                |
| 504             | 1        | Europe                   | NA                                                                                  | Lab/<br>Experimental                               | S. salar                                                             | Juvenile      | Acidity                                        | Growth                                | Environment,                                          | Physiology                |
| 505             | 2to5     | Europe                   | NA                                                                                  | Lab/<br>Experimental                               | S. salar                                                             | Outmigration  | Environment,<br>Temperature_<br>FW             | Maturation, Phenology                 | Environment,                                          | Demography,<br>Physiology |
| 506             | 2to5     | Europe                   | NA                                                                                  | Field/<br>RemoteSensing                            | S. salar                                                             | Outmigration  | Habitat,<br>Management,<br>Predators           | Behaviour, Mortality,<br>Phenology    | Species_interactions,<br>Environment, ,<br>Management | Dispersal,<br>Demography  |

| Citation number | Duration | Region               | Subregion                                        | Type of study                                       | Species                                               | Life stage                | Driver                                                       | Response                                       | Driver Process                        | Response Process                        |
|-----------------|----------|----------------------|--------------------------------------------------|-----------------------------------------------------|-------------------------------------------------------|---------------------------|--------------------------------------------------------------|------------------------------------------------|---------------------------------------|-----------------------------------------|
| 507             | NA       | NA                   | NA                                               | Review/<br>MetaAnalysis                             | Salmonid_<br>general                                  | Freshwater_ha<br>bitat    | Habitat                                                      | NA                                             | Environment,                          | NA                                      |
| 508             | NA       | Northwest            | Northwest_Co<br>astal                            | Projections/<br>physical,<br>Projections/<br>salmon | O. kisutch, O.<br>mykiss, O.<br>tshawytscha           | Outmigration              | Habitat,<br>Restoration                                      | NA                                             | Environment, ,<br>Management          | NA                                      |
| 509             | 10plus   | Northwest            | Northwest_Co<br>astal,<br>Northwest_Col<br>umbia | Projections/<br>salmon                              | O. kisutch                                            | Upmigration               | Flow,<br>Temperature_<br>FW                                  | Phenology                                      | Environment,                          | Demography                              |
| 510             | 10plus   | British_Colum<br>bia | British_Colum<br>bia_not_Fraser                  | Field/<br>RemoteSensing                             | O. clarkii, O.<br>kisutch                             | Juvenile,<br>Population   | NA                                                           | Productivity                                   |                                       | Demography                              |
| 511             | NA       | Largescale           | NA                                               | Model,<br>Projections/<br>ecosystem                 | Other_species                                         | Marine                    | Acidity,<br>Ecosystem                                        | Habitat_Distribution                           | Species_interactions,<br>Environment, | Dispersal                               |
| 512             | NA       | NA                   | NA                                               | Theoretical/<br>Opinion                             | Other_species                                         | Population                | NA                                                           | Habitat_Distribution,<br>Phenology             |                                       | Dispersal,<br>Demography                |
| 513             | 2to5     | Europe               | NA                                               | Field/<br>RemoteSensing,<br>Lab/<br>Experimental    | S. trutta                                             | Egg,<br>Population        | Environment,<br>Temperature_<br>FW                           | Habitat_Distribution,<br>Morphology, Mortality | Environment,                          | Dispersal,<br>Demography,<br>Physiology |
| 514             | 1        | Europe               | NA                                               | Lab/<br>Experimental                                | S. salar                                              | Juvenile,<br>Outmigration | Density_Food,<br>Dissolved_oxyg<br>en,<br>Temperature_<br>FW | Behaviour,<br>Physiology_Condition             | Species_interactions,<br>Environment, | Dispersal,<br>Physiology                |
| 515             | 1        | Europe               | NA                                               | Lab/<br>Experimental                                | S. salar                                              | Juvenile                  | Density_Food,<br>Dissolved_oxyg<br>en,<br>Temperature_<br>FW | Behaviour,<br>Physiology_Condition             | Species_interactions,<br>Environment, | Dispersal,<br>Physiology                |
| 516             | NA       | Northwest            | Northwest_Col<br>umbia                           | Model                                               | O. mykiss, O.<br>tshawytscha,<br>Salmonid_<br>general | Freshwater_ha<br>bitat    | Habitat,<br>Management,<br>Restoration                       | Population_resilience,<br>Productivity         | Environment, ,<br>Management          | Demography                              |
| 517             | NA       | Mountain_we<br>st    | NA                                               | Model                                               | O. clarkii, S.<br>trutta                              | Spawning                  | Contaminants                                                 | Growth, Productivity                           | Environment,                          | Demography,<br>Physiology               |

| Citation number | Duration | Region             | Subregion                             | Type of study                         | Species                                                  | Life stage       | Driver                                  | Response                                                 | Driver Process            | Response Process                 |
|-----------------|----------|--------------------|---------------------------------------|---------------------------------------|----------------------------------------------------------|------------------|-----------------------------------------|----------------------------------------------------------|---------------------------|----------------------------------|
| 518             | 10plus   | British_Columbia   | British_Columbia_not_Fraser           | Field/RemoteSensing                   | O. gorbuscha, O. keta, O. nerka, O. tshawytscha          | Marine           | Predators                               | Mortality                                                | Species_interactions,     | Demography                       |
| 519             | NA       | Northwest          | Northwest_Columbia                    | Review/MetaAnalysis                   | O. mykiss, O. tshawytscha                                | Upmigration      | Genetics                                | Genetics_Adaptation, Phenology                           | Evolution,                | Demography, Evolution            |
| 520             | NA       | Northwest          | Northwest_Coastal, Northwest_Columbia | Review/MetaAnalysis                   | O. keta, O. kisutch, O. mykiss, O. nerka, O. tshawytscha | Population       | NA                                      | Population_resilience, Productivity                      |                           | Demography                       |
| 521             | 1        | Largescale         | NA                                    | Lab/Experimental                      | O. tshawytscha, Other_species                            | Upmigration      | Acidity                                 | Performance                                              | Environment,              | Physiology                       |
| 522             | NA       | NA                 | NA                                    | Review/MetaAnalysis                   | General                                                  | Marine           | Acidity, Contaminants, Dissolved_oxygen | Morphology, Performance                                  | Environment,              | Physiology                       |
| 523             | 6to10    | Northwest          | Northwest_Puget_Sound                 | Field/RemoteSensing                   | O. mykiss                                                | Population       | Habitat, Management, Restoration        | Genetics_Adaptation                                      | Environment, , Management | Evolution                        |
| 524             | 1        | Mountain_west      | NA                                    | Field/RemoteSensing, Lab/Experimental | O. mykiss                                                | Juvenile         | Contaminants                            | Physiology_Condition                                     | Environment,              | Physiology                       |
| 525             | 1        | Europe             | NA                                    | Lab/Experimental                      | Other_fish                                               | Juvenile, Marine | Acidity                                 | NA                                                       | Environment,              | NA                               |
| 526             | NA       | Europe             | NA                                    | Review/MetaAnalysis                   | General                                                  | Marine           | Contaminants                            | Performance                                              | Environment,              | Physiology                       |
| 527             | NA       | East_North_America | NA                                    | Theoretical/Opinion                   | S. salar                                                 | Evolution        | Genetics                                | Genetics_Adaptation, Life_history, Population_resilience | Evolution,                | Demography, Evolution            |
| 528             | 10plus   | Northwest          | Northwest_Columbia                    | Field/RemoteSensing                   | O. tshawytscha                                           | Spawning         | NA                                      | Genetics_Adaptation, Habitat_Distribution, Phenology     |                           | Dispersal, Demography, Evolution |
| 529             | 2to5     | Europe             | NA                                    | Lab/Experimental                      | S. salar                                                 | Juvenile         | Temperature_FW                          | Growth, Maturation, Physiology_Condition                 | Environment,              | Physiology                       |

| Citation number | Duration | Region                     | Subregion                   | Type of study              | Species        | Life stage                            | Driver                                        | Response                            | Driver Process                     | Response Process       |
|-----------------|----------|----------------------------|-----------------------------|----------------------------|----------------|---------------------------------------|-----------------------------------------------|-------------------------------------|------------------------------------|------------------------|
| 530             | 2to5     | East_North_America         | NA                          | Field/RemoteSensing        | S. salar       | Spawning, Upmigration                 | Flow, Habitat, Management, Temperature_FW     | Habitat_Distribution                | Environment, , Management          | Dispersal              |
| 531             | 1        | East_North_America         | NA                          | Field/RemoteSensing        | S. salar       | Upmigration                           | Habitat, Temperature_FW                       | Behaviour, Habitat_Distribution     | Environment,                       | Dispersal              |
| 532             | 2to5     | British_Columbia           | British_Columbia_Fraser     | Field/RemoteSensing        | O. nerka       | Marine, Outmigration                  | Density_Food                                  | Growth, Phenology                   | Species_interactions,              | Demography, Physiology |
| 533             | 10plus   | British_Columbia           | British_Columbia_Fraser     | Field/RemoteSensing        | O. nerka       | Population                            | Management                                    | Population_resilience, Productivity | , Management                       | Demography             |
| 534             | 6to10    | British_Columbia           | British_Columbia_not_Fraser | Field/RemoteSensing, Model | O. tshawytscha | Marine, Population                    | NA                                            | Habitat_Distribution, Life_history  |                                    | Dispersal, Demography  |
| 535             | 10plus   | East_North_America, Europe | NA                          | Field/RemoteSensing        | S. salar       | Marine                                | Density_Food, Environment, Temperature_marine | Growth                              | Species_interactions, Environment, | Physiology             |
| 536             | 10plus   | British_Columbia           | British_Columbia_not_Fraser | Field/RemoteSensing        | O. mykiss      | Juvenile, Marine                      | Temperature_marine                            | Growth, Mortality                   | Environment,                       | Demography, Physiology |
| 537             | 10plus   | East_North_America, Europe | NA                          | Field/RemoteSensing        | S. salar       | Marine, Population                    | Climate_indices                               | Productivity                        | Environment,                       | Demography             |
| 538             | 10plus   | East_North_America         | NA                          | Field/RemoteSensing        | S. salar       | Marine                                | Predators                                     | Mortality                           | Species_interactions,              | Demography             |
| 539             | 10plus   | California                 | California_CV               | Field/RemoteSensing        | O. tshawytscha | General, Juvenile, Marine, Population | Environment, Flow, Predators, Temperature_FW  | Productivity                        | Species_interactions, Environment, | Demography             |
| 540             | 2to5     | Largescale                 | NA                          | Field/RemoteSensing        | O. tshawytscha | Marine                                | Prey                                          | Habitat_Distribution                | Species_interactions,              | Dispersal              |
| 541             | 2to5     | Largescale                 | NA                          | Lab/Experimental           | Other_fish     | Marine                                | Acidity                                       | NA                                  | Environment,                       | NA                     |
| 542             | 1        | British_Columbia           | British_Columbia_not_Fraser | Lab/Experimental           | O. gorbuscha   | Marine, Outmigration                  | Acidity, Dissolved_oxygen                     | Physiology_Condition                | Environment,                       | Physiology             |

| Citation number | Duration | Region                | Subregion               | Type of study                                 | Species                   | Life stage           | Driver                                      | Response                                    | Driver Process                                  | Response Process       |
|-----------------|----------|-----------------------|-------------------------|-----------------------------------------------|---------------------------|----------------------|---------------------------------------------|---------------------------------------------|-------------------------------------------------|------------------------|
| 543             | 1        | Europe                | NA                      | Lab/<br>Experimental                          | O. mykiss                 | Juvenile             | Dissolved_oxygen, Predators, Temperature_FW | Behaviour                                   | Species_interactions, Environment,              | Dispersal              |
| 544             | 10plus   | Alaska                | Alaska_W                | Field/<br>RemoteSensing                       | O. gorbuscha, O. keta     | Marine               | Density_Food                                | Growth                                      | Species_interactions,                           | Physiology             |
| 545             | 10plus   | Alaska, Japan, Russia | Alaska_W                | Field/<br>RemoteSensing                       | O. gorbuscha, O. keta     | Marine               | Density_Food, Temperature_marine            | Growth                                      | Species_interactions, Environment,              | Physiology             |
| 546             | 1        | Northwest             | Northwest_Columbia      | Lab/<br>Experimental                          | O. tshawytscha            | Egg                  | Temperature_FW                              | Phenology, Physiology_Condition             | Environment,                                    | Demography, Physiology |
| 547             | NA       | Japan                 | NA                      | Field/<br>RemoteSensing, Model                | Other_fish                | General, Population  | Habitat, Temperature_FW                     | Habitat_Distribution, Population_resilience | Environment,                                    | Dispersal, Demography  |
| 548             | 10plus   | Alaska                | Alaska_W                | Field/<br>RemoteSensing                       | Other_fish                | Marine               | Climate_indices, Ecosystem, Fisheries, Prey | NA                                          | Species_interactions, Environment, , Management | NA                     |
| 549             | NA       | Northwest             | NA                      | Model                                         | O. tshawytscha            | Juvenile             | Habitat, Temperature_FW                     | Growth, Phenology                           | Environment,                                    | Demography, Physiology |
| 550             | 1        | Largescale            | NA                      | Field/<br>RemoteSensing, Projections/physical | Salmonid_general          | Freshwater_habitat   | Habitat, Temperature_FW                     | NA                                          | Environment,                                    | NA                     |
| 551             | 6to10    | British_Columbia      | British_Columbia_Fraser | Field/<br>RemoteSensing                       | O. nerka                  | Outmigration         | Predators                                   | Behaviour, Mortality                        | Species_interactions,                           | Dispersal, Demography  |
| 552             | NA       | NA                    | NA                      | Review/<br>MetaAnalysis                       | General, Salmonid_general | General, Upmigration | Fisheries, Management, Temperature_FW       | Mortality                                   | Environment, , Management                       | Demography             |
| 553             | 1        | British_Columbia      | British_Columbia_Fraser | Lab/<br>Experimental                          | O. nerka                  | Upmigration          | Fisheries, Temperature_FW                   | Physiology_Condition                        | Environment, , Management                       | Physiology             |
| 554             | 2to5     | East_North_America    | NA                      | Field/<br>RemoteSensing                       | S. malma                  | Marine, Outmigration | Environment, Temperature_marine             | Habitat_Distribution, Phenology             | Environment,                                    | Dispersal, Demography  |

| Citation number | Duration | Region             | Subregion               | Type of study       | Species                 | Life stage            | Driver                                          | Response                                               | Driver Process                     | Response Process                  |
|-----------------|----------|--------------------|-------------------------|---------------------|-------------------------|-----------------------|-------------------------------------------------|--------------------------------------------------------|------------------------------------|-----------------------------------|
| 555             | 2to5     | South_America      | NA                      | Lab/Experimental    | O. mykiss               | Juvenile              | Genetics, Temperature_FW                        | Growth, Mortality, Phenology, Physiology_Condition     | Evolution, Environment,            | Demography, Physiology            |
| 556             | 2to5     | Northwest          | Northwest_Puget_Sound   | Field/RemoteSensing | O. tshawytscha          | Marine                | Habitat                                         | Growth, Habitat_Distribution, Mortality                | Environment,                       | Dispersal, Demography, Physiology |
| 557             | 1        | East_North_America | NA                      | Lab/Experimental    | Other_fish, S. salar    | Upmigration           | Temperature_FW                                  | Performance, Physiology_Condition                      | Environment,                       | Physiology                        |
| 558             | 1        | East_North_America | NA                      | Lab/Experimental    | S. salar                | Juvenile, Marine      | Dissolved_oxygen, Temperature_FW                | Mortality                                              | Environment,                       | Demography                        |
| 559             | NA       | Largescale         | NA                      | Review/MetaAnalysis | Other_species           | Marine                | Ecosystem, Environment, Temperature_marine      | NA                                                     | Species_interactions, Environment, | NA                                |
| 560             | 1        | Northwest          | Northwest_Columbia      | Lab/Experimental    | O. mykiss               | Evolution             | Dissolved_oxygen, Genetics, Temperature_FW      | Genetics_Adaptation, Performance, Physiology_Condition | Evolution, Environment,            | Evolution, Physiology             |
| 561             | 10plus   | British_Columbia   | British_Columbia_Fraser | Field/RemoteSensing | General                 | General               | Ecosystem, Environment                          | NA                                                     | Species_interactions, Environment, | NA                                |
| 562             | NA       | NA                 | NA                      | Theoretical/Opinion | Salmonid_general        | General, Outmigration | Fisheries, Management                           | Population_resilience                                  | , Management                       | Demography                        |
| 563             | 1        | Asia_other         | NA                      | Lab/Experimental    | O. mykiss               | Outmigration          | Temperature_FW, Temperature_marine              | Growth, Physiology_Condition                           | Environment,                       | Physiology                        |
| 564             | 1        | Asia_other         | NA                      | Lab/Experimental    | O. mykiss               | Outmigration          | Environment, Temperature_FW, Temperature_marine | Growth, Physiology_Condition                           | Environment,                       | Physiology                        |
| 565             | NA       | NA                 | NA                      | Review/MetaAnalysis | General                 | General               | Ecosystem, Methods                              | NA                                                     | Species_interactions,              | NA                                |
| 566             | 2to5     | Northwest          | Northwest_Columbia      | Field/RemoteSensing | O. keta, O. tshawytscha | Spawning              | Flow, Habitat, Temperature_FW                   | Behaviour, Habitat_Distribution                        | Environment,                       | Dispersal                         |

| Citation number | Duration | Region                | Subregion                                      | Type of study                         | Species          | Life stage                  | Driver                                          | Response                                                     | Driver Process                                  | Response Process       |
|-----------------|----------|-----------------------|------------------------------------------------|---------------------------------------|------------------|-----------------------------|-------------------------------------------------|--------------------------------------------------------------|-------------------------------------------------|------------------------|
| 567             | NA       | Northwest             | Northwest_Columbia                             | Lab/Experimental                      | O. tshawytscha   | Juvenile                    | Temperature_FW                                  | Growth, Mortality                                            | Environment,                                    | Demography, Physiology |
| 568             | 1        | Northwest             | Northwest_Columbia                             | Lab/Experimental                      | O. tshawytscha   | Juvenile                    | Density_Food, Temperature_FW                    | Growth                                                       | Species_interactions, Environment,              | Physiology             |
| 569             | 10plus   | Largescale            | NA                                             | Field/RemoteSensing                   | Other_fish       | Marine                      | Fisheries, Temperature_marine                   | Growth                                                       | Environment, , Management                       | Physiology             |
| 570             | 1        | Europe                | NA                                             | Lab/Experimental                      | Other_fish       | Juvenile                    | Temperature_FW                                  | Morphology                                                   | Environment,                                    | Physiology             |
| 571             | 1        | East_North_America    | NA                                             | Lab/Experimental                      | S. salar         | Marine                      | Temperature_marine                              | Physiology_Condition                                         | Environment,                                    | Physiology             |
| 572             | 1        | East_North_America    | NA                                             | Field/RemoteSensing, Lab/Experimental | S. salar         | Marine                      | Temperature_marine                              | Growth, Physiology_Condition                                 | Environment,                                    | Physiology             |
| 573             | NA       | Northwest             | Northwest_Columbia, Northwest_Columbia         | Review/MetaAnalysis                   | General          | Freshwater_habitat, General | Ecosystem, Invasives                            | Habitat_Distribution                                         | Species_interactions,                           | Dispersal              |
| 574             | NA       | NA                    | NA                                             | Review/MetaAnalysis                   | Salmonid_general | Juvenile                    | Management                                      | Productivity                                                 | , Management                                    | Demography             |
| 575             | 10plus   | Alaska                | Alaska_SE                                      | Field/RemoteSensing                   | O. gorbuscha     | Egg, Spawning               | Genetics                                        | Genetics_Adaptation, Phenology, Population_resilience        | Evolution,                                      | Demography, Evolution  |
| 576             | 10plus   | California, Northwest | California_N, California_S, Northwest_Columbia | Field/RemoteSensing                   | Other_species    | Marine                      | Contaminants, Ecosystem, Environment, Predators | NA                                                           | Species_interactions, Environment,              | NA                     |
| 577             | 6to10    | British_Columbia      | British_Columbia_Fraser                        | Field/RemoteSensing, Model            | O. mykiss        | Juvenile                    | Flow, Management, Temperature_FW                | Growth, Physiology_Condition                                 | Environment, , Management                       | Physiology             |
| 578             | NA       | NA                    | NA                                             | Model                                 | O. kisutch       | Population                  | Density_Food, Flow, Management                  | Life_history, Mortality, Population_resilience, Productivity | Species_interactions, Environment, , Management | Demography             |

| Citation number | Duration | Region             | Subregion             | Type of study                            | Species               | Life stage                                             | Driver                                                 | Response                                    | Driver Process                     | Response Process       |
|-----------------|----------|--------------------|-----------------------|------------------------------------------|-----------------------|--------------------------------------------------------|--------------------------------------------------------|---------------------------------------------|------------------------------------|------------------------|
| 579             | NA       | NA                 | NA                    | Model                                    | General               | Evolution, Juvenile, Marine, Outmigration, Upmigration | Temperature_FW                                         | Phenology                                   | Environment,                       | Demography             |
| 580             | 2to5     | East_North_America | NA                    | Field/RemoteSensing, Lab/Experimental    | O. mykiss, Other_fish | Upmigration                                            | Flow, Temperature_FW                                   | Performance, Physiology_Condition           | Environment,                       | Physiology             |
| 581             | 1        | East_North_America | NA                    | Lab/Experimental                         | Other_fish            | Upmigration                                            | Temperature_FW                                         | Performance, Physiology_Condition           | Environment,                       | Physiology             |
| 582             | 10plus   | Europe             | NA                    | Review/MetaAnalysis                      | S. salar              | Marine                                                 | Genetics                                               | Habitat_Distribution                        | Evolution,                         | Dispersal              |
| 583             | 10plus   | Europe             | NA                    | Field/RemoteSensing                      | S. salar, S. trutta   | Juvenile                                               | Density_Food, Flow                                     | Habitat_Distribution                        | Species_interactions, Environment, | Dispersal              |
| 584             | 1        | California         | California_CV         | Lab/Experimental                         | O. mykiss             | Juvenile, Outmigration                                 | Environment, Temperature_FW                            | Mortality, Physiology_Condition             | Environment,                       | Demography, Physiology |
| 585             | NA       | California         | California_CV         | Lab/Experimental                         | O. tshawytscha        | Juvenile                                               | Contaminants, Temperature_FW                           | Physiology_Condition                        | Environment,                       | Physiology             |
| 586             | 1        | Northwest          | Northwest_Puget_Sound | Field/RemoteSensing                      | O. clarkii            | Population                                             | Genetics, Management                                   | Habitat_Distribution, Population_resilience | Evolution, , Management            | Dispersal, Demography  |
| 587             | NA       | NA                 | NA                    | Review/MetaAnalysis                      | Other_species         | General                                                | Contaminants, Dissolved_oxygen, Ecosystem, Environment | NA                                          | Species_interactions, Environment, | NA                     |
| 588             | 1        | Europe             | NA                    | Lab/Experimental                         | Other_fish            | Marine                                                 | Temperature_marine                                     | Performance                                 | Environment,                       | Physiology             |
| 589             | 10plus   | Europe             | NA                    | Field/RemoteSensing                      | S. salar              | Juvenile                                               | Density_Food, Flow, Temperature_FW                     | Habitat_Distribution, Productivity          | Species_interactions, Environment, | Dispersal, Demography  |
| 590             | NA       | NA                 | NA                    | Review/MetaAnalysis, Theoretical/Opinion | Other_species         | General                                                | Contaminants, Ecosystem, Environment                   | NA                                          | Species_interactions, Environment, | NA                     |



| Citation number | Duration | Region                       | Subregion                 | Type of study                                                | Species                                         | Life stage                           | Driver                                     | Response                                     | Driver Process                        | Response Process          |
|-----------------|----------|------------------------------|---------------------------|--------------------------------------------------------------|-------------------------------------------------|--------------------------------------|--------------------------------------------|----------------------------------------------|---------------------------------------|---------------------------|
| 591             | 1        | Europe                       | NA                        | Lab/<br>Experimental                                         | S. salar                                        | Marine                               | Disease,<br>Temperature_<br>marine         | Growth, Mortality,<br>Physiology_Condition   | Species_interactions,<br>Environment, | Demography,<br>Physiology |
| 592             | 10plus   | California                   | California_CV             | Field/<br>RemoteSensing                                      | O. tshawytscha                                  | Juvenile                             | Flow,<br>Temperature_<br>FW                | Habitat_Distribution                         | Environment,                          | Dispersal                 |
| 593             | 10plus   | California                   | California_CV             | Field/<br>RemoteSensing                                      | O. tshawytscha,<br>Other_fish                   | Outmigration                         | Predators,<br>Temperature_<br>marine       | Habitat_Distribution                         | Species_interactions,<br>Environment, | Dispersal                 |
| 594             | 6to10    | California                   | California_CV             | Field/<br>RemoteSensing                                      | O. tshawytscha                                  | Juvenile                             | Density_Food,<br>Flow, Prey                | Behaviour                                    | Species_interactions,<br>Environment, | Dispersal                 |
| 595             | 10plus   | Northwest                    | Northwest_Pu<br>get_Sound | Field/<br>RemoteSensing                                      | O. nerka, O.<br>tshawytscha                     | Spawning,<br>Upmigration             | Habitat,<br>Temperature_<br>FW             | Behaviour, Phenology                         | Environment,                          | Dispersal,<br>Demography  |
| 596             | 10plus   | Northwest                    | Northwest_Pu<br>get_Sound | Field/<br>RemoteSensing                                      | S. confluentus                                  | Outmigration                         | Prey,<br>Temperature_<br>FW                | Habitat_Distribution,<br>Phenology           | Species_interactions,<br>Environment, | Dispersal,<br>Demography  |
| 597             | 6to10    | Europe                       | NA                        | Field/<br>RemoteSensing,<br>Model                            | S. trutta                                       | Freshwater_ha<br>bitat               | Habitat                                    | Habitat_Distribution                         | Environment,                          | Dispersal                 |
| 598             | NA       | Mountain_we<br>st, Northwest | Northwest_Col<br>umbia    | Field/<br>RemoteSensing,<br>Model,<br>Projections/<br>salmon | O. mykiss, O.<br>tshawytscha, S.<br>confluentus | Egg                                  | Flow, Habitat                              | Mortality                                    | Environment,                          | Demography                |
| 599             | NA       | Northwest                    | Northwest_Col<br>umbia    | Field/<br>RemoteSensing,<br>Model                            | Salmonid_<br>general                            | Juvenile,<br>Outmigration            | Flow, Habitat                              | Behaviour,<br>Habitat_Distribution           | Environment,                          | Dispersal                 |
| 600             | 2to5     | Alaska                       | Alaska_W                  | Field/<br>RemoteSensing                                      | O. keta, O.<br>nerka                            | Upmigration                          | Disease,<br>Temperature_<br>FW             | Mortality, Performance                       | Species_interactions,<br>Environment, | Demography,<br>Physiology |
| 601             | 10plus   | Russia                       | NA                        | Field/<br>RemoteSensing                                      | O. gorbuscha, O.<br>keta, O. kisutch            | Population                           | NA                                         | Life_history,<br>Maturation,<br>Productivity |                                       | Demography,<br>Physiology |
| 602             | 2to5     | Northwest                    | Northwest_Col<br>umbia    | Field/<br>RemoteSensing                                      | O. tshawytscha                                  | Juvenile,<br>Marine,<br>Outmigration | Flow,<br>Management,<br>Temperature_<br>FW | Carryover, Mortality                         | Environment, ,<br>Management          | Demography                |

| Citation number | Duration | Region                                          | Subregion               | Type of study                                   | Species                                                    | Life stage                     | Driver                                                                | Response                          | Driver Process                     | Response Process       |
|-----------------|----------|-------------------------------------------------|-------------------------|-------------------------------------------------|------------------------------------------------------------|--------------------------------|-----------------------------------------------------------------------|-----------------------------------|------------------------------------|------------------------|
| 603             | 1        | Northwest                                       | Northwest_Puget_Sound   | Lab/Experimental                                | O. mykiss                                                  | Juvenile                       | Density_Food, Temperature_FW                                          | Genetics_Adaptation, Mortality    | Species_interactions, Environment, | Demography, Evolution* |
| 604             | 10plus   | Northwest                                       | Northwest_Columbia      | Field/RemoteSensing                             | O. tshawytscha                                             | Marine, Outmigration           | Climate_indices, Flow, Management, Temperature_FW, Temperature_marine | Carryover, Mortality              | Environment, , Management          | Demography             |
| 605             | 10plus   | Northwest                                       | Northwest_Columbia      | Field/RemoteSensing                             | O. kisutch, O. tshawytscha                                 | Freshwater_habitat, Marine     | Environment, Habitat, Temperature_FW, Temperature_marine              | Productivity                      | Environment,                       | Demography             |
| 606             | 10plus   | Northwest                                       | Northwest_Columbia      | Field/RemoteSensing                             | O. tshawytscha                                             | Juvenile, Marine, Outmigration | Climate_indices, Management                                           | Carryover, Mortality              | Environment, , Management          | Demography             |
| 607             | 10plus   | Northwest                                       | Northwest_Columbia      | Field/RemoteSensing, Model, Review/MetaAnalysis | General                                                    | Egg, Freshwater_habitat        | Environment, Flow, Habitat                                            | NA                                | Environment,                       | NA                     |
| 608             | 1        | British_Columbia                                | British_Columbia_Fraser | Lab/Experimental                                | O. nerka                                                   | Juvenile                       | Genetics, Temperature_FW                                              | Performance, Physiology_Condition | Evolution, Environment,            | Physiology             |
| 609             | 1        | East_North_America                              | NA                      | Lab/Experimental                                | Other_fish                                                 | Marine                         | Density_Food                                                          | Performance, Physiology_Condition | Species_interactions,              | Physiology             |
| 610             | NA       | Northwest                                       | Northwest_Puget_Sound   | Field/RemoteSensing, Review/MetaAnalysis        | O. tshawytscha                                             | Freshwater_habitat, General    | Habitat, Restoration, Temperature_FW                                  | Population_resilience             | Environment, , Management          | Demography             |
| 611             | NA       | Alaska, British_Columbia, Largescale, Northwest | NA                      | Review/MetaAnalysis                             | O. gorbuscha, O. keta, O. mykiss, O. nerka, O. tshawytscha | Marine                         | Prey                                                                  | Habitat_Distribution              | Species_interactions,              | Dispersal              |

| Citation number | Duration | Region                                          | Subregion | Type of study                                     | Species                                                  | Life stage           | Driver                                        | Response                                    | Driver Process                                  | Response Process       |
|-----------------|----------|-------------------------------------------------|-----------|---------------------------------------------------|----------------------------------------------------------|----------------------|-----------------------------------------------|---------------------------------------------|-------------------------------------------------|------------------------|
| 612             | NA       | Alaska, British_Columbia, Largescale, Northwest | NA        | Review/<br>MetaAnalysis                           | O. keta, O. kisutch, O. mykiss, O. nerka, O. tshawytscha | Marine               | Density_Food, Ecosystem, Prey                 | Habitat_Distribution                        | Species_interactions,                           | Dispersal              |
| 613             | NA       | NA                                              | NA        | Review/<br>MetaAnalysis                           | General                                                  | General              | Predators, Temperature_FW                     | Genetics_Adaptation, Life_history           | Species_interactions, Environment,              | Demography, Evolution  |
| 614             | NA       | East_North_America                              | NA        | Theoretical/<br>Opinion                           | S. salar                                                 | General              | Management                                    | Population_resilience                       | , Management                                    | Demography             |
| 615             | 10plus   | Europe                                          | NA        | Field/<br>RemoteSensing                           | S. salar                                                 | Juvenile, Marine     | NA                                            | Carryover, Growth, Maturation, Mortality    |                                                 | Demography, Physiology |
| 616             | 10plus   | Europe                                          | NA        | Theoretical/<br>Opinion                           | S. salar                                                 | Juvenile, Marine     | NA                                            | Growth, Mortality                           |                                                 | Demography, Physiology |
| 617             | 10plus   | Europe                                          | NA        | Lab/<br>Experimental                              | S. salar                                                 | Juvenile, Population | Density_Food, Flow, Temperature_FW            | Mortality, Productivity                     | Species_interactions, Environment,              | Demography             |
| 618             | 10plus   | East_North_America                              | NA        | Field/<br>RemoteSensing                           | Other_fish                                               | Juvenile, Marine     | Fisheries                                     | Growth, Life_history, Population_resilience | , Management                                    | Demography, Physiology |
| 619             | NA       | Largescale                                      | NA        | Review/<br>MetaAnalysis                           | General                                                  | Marine               | Ecosystem, Environment, Fisheries, Management | NA                                          | Species_interactions, Environment, , Management | NA                     |
| 620             | NA       | NA                                              | NA        | Review/<br>MetaAnalysis                           | Other_species                                            | General              | Contaminants, Ecosystem, Environment          | NA                                          | Species_interactions, Environment,              | NA                     |
| 621             | 10plus   | Alaska                                          | Alaska_S  | Field/<br>RemoteSensing, Projections/<br>physical | O. nerka                                                 | Juvenile             | Habitat, Prey, Temperature_FW                 | Growth, Physiology_Condition                | Species_interactions, Environment,              | Physiology             |
| 622             | 10plus   | Alaska                                          | Alaska_S  | Field/<br>RemoteSensing                           | O. nerka                                                 | Juvenile             | Environment, Habitat, Temperature_FW          | Growth                                      | Environment,                                    | Physiology             |
| 623             | NA       | Largescale                                      | NA        | Review/<br>MetaAnalysis                           | General                                                  | General, Marine      | Ecosystem                                     | NA                                          | Species_interactions,                           | NA                     |

| Citation number | Duration | Region           | Subregion               | Type of study                     | Species                       | Life stage                           | Driver                                                  | Response                             | Driver Process                        | Response Process                        |
|-----------------|----------|------------------|-------------------------|-----------------------------------|-------------------------------|--------------------------------------|---------------------------------------------------------|--------------------------------------|---------------------------------------|-----------------------------------------|
| 624             | 1        | California       | California_CV           | Field/<br>RemoteSensing           | O. tshawytscha                | Outmigration                         | Flow,<br>Management                                     | Behaviour, Mortality,<br>Performance | Environment, ,<br>Management          | Dispersal,<br>Demography,<br>Physiology |
| 625             | 2to5     | Northwest        | Northwest_Columbia      | Field/<br>RemoteSensing           | O. tshawytscha                | Egg                                  | Temperature_<br>FW                                      | Habitat_Distribution,<br>Phenology   | Environment,                          | Dispersal,<br>Demography                |
| 626             | 10plus   | British_Columbia | British_Columbia_Fraser | Field/<br>RemoteSensing,<br>Model | O. nerka                      | Juvenile                             | Density_Food,<br>Predators,<br>Prey                     | Productivity                         | Species_interactions,                 | Demography                              |
| 627             | NA       | Mountain_west    | NA                      | Theoretical/<br>Opinion           | O. clarkii                    | General                              | Management                                              | Population_resilience                | , Management                          | Demography                              |
| 628             | 10plus   | Northwest        | Northwest_Columbia      | Field/<br>RemoteSensing           | O. mykiss                     | Outmigration                         | Density_Food,<br>Predators                              | Mortality                            | Species_interactions,                 | Demography                              |
| 629             | 10plus   | Northwest        | Northwest_Columbia      | Field/<br>RemoteSensing           | O. mykiss, O.<br>tshawytscha  | Juvenile,<br>Marine,<br>Outmigration | Climate_indice<br>s, Flow,<br>Management                | Mortality                            | Environment, ,<br>Management          | Demography                              |
| 630             | NA       | Largescale       | NA                      | Model                             | General                       | Freshwater_habitat                   | Flow                                                    | NA                                   | Environment,                          | NA                                      |
| 631             | 10plus   | British_Columbia | British_Columbia_Fraser | Model                             | General                       | Freshwater_habitat                   | Management,<br>Methods,<br>Temperature_<br>FW           | NA                                   | Environment, ,<br>Management          | NA                                      |
| 632             | NA       | British_Columbia | British_Columbia_Fraser | Model,<br>Projections/<br>salmon  | O. nerka                      | Upmigration                          | Temperature_<br>FW                                      | Mortality,<br>Physiology_Condition   | Environment,                          | Demography,<br>Physiology               |
| 633             | 1        | Northwest        | Northwest_Columbia      | Field/<br>RemoteSensing,<br>Model | General                       | Freshwater_habitat                   | Flow,<br>Methods,<br>Restoration,<br>Temperature_<br>FW | NA                                   | Environment, ,<br>Management          | NA                                      |
| 634             | NA       | Northwest        | Northwest_Puget_Sound   | Field/<br>RemoteSensing           | O. tshawytscha                | Juvenile                             | Flow, Habitat                                           | Productivity                         | Environment,                          | Demography                              |
| 635             | 2to5     | California       | California_N            | Field/<br>RemoteSensing           | O. kisutch, O.<br>tshawytscha | Juvenile,<br>Upmigration             | Disease,<br>Temperature_<br>FW                          | Mortality                            | Species_interactions,<br>Environment, | Demography                              |
| 636             | 2to5     | California       | California_N            | Projections/<br>physical          | General                       | Freshwater_habitat                   | Flow,<br>Management,<br>Temperature_<br>FW              | NA                                   | Environment, ,<br>Management          | NA                                      |

| Citation number | Duration | Region                      | Subregion                                                          | Type of study             | Species                               | Life stage             | Driver                                  | Response                      | Driver Process                     | Response Process       |
|-----------------|----------|-----------------------------|--------------------------------------------------------------------|---------------------------|---------------------------------------|------------------------|-----------------------------------------|-------------------------------|------------------------------------|------------------------|
| 637             | NA       | Northwest                   | Northwest_Coastal, Northwest_Columbia, Northwest_Puget_Sound       | Projections/physical      | General                               | Freshwater_habitat     | Ecosystem, Environment                  | NA                            | Species_interactions, Environment, | NA                     |
| 638             | 1        | Europe                      | NA                                                                 | Lab/Experimental          | S. salar                              | Marine                 | Disease, Temperature_FW                 | NA                            | Species_interactions, Environment, | NA                     |
| 639             | NA       | Northwest                   | Northwest_Columbia                                                 | Field/RemoteSensing       | O. mykiss                             | Evolution              | Flow, Genetics, Habitat, Temperature_FW | Genetics_Adaptation           | Evolution, Environment,            | Evolution              |
| 640             | 2to5     | Europe                      | NA                                                                 | Lab/Experimental          | S. salar                              | Juvenile               | Environment, Temperature_FW             | Growth, Physiology_Condition  | Environment,                       | Physiology             |
| 641             | 1        | Europe                      | NA                                                                 | Lab/Experimental          | S. salar                              | Juvenile               | Temperature_FW                          | Growth, Physiology_Condition  | Environment,                       | Physiology             |
| 642             | 1        | Europe                      | NA                                                                 | Lab/Experimental          | S. salar                              | Juvenile, Outmigration | Temperature_FW                          | Physiology_Condition          | Environment,                       | Physiology             |
| 643             | 1        | Northwest                   | Northwest_Columbia                                                 | Field/RemoteSensing       | O. tshawytscha                        | Spawning               | Flow, Habitat, Management               | NA                            | Environment, , Management          | NA                     |
| 644             | 6to10    | Northwest                   | Northwest_Columbia                                                 | Model, Projections/salmon | O. kisutch, O. mykiss, O. tshawytscha | Juvenile               | Temperature_FW                          | Growth, Population_resilience | Environment,                       | Demography, Physiology |
| 645             | 6to10    | British_Columbia, Northwest | British_Columbia_not_Fraser, Northwest_Coastal, Northwest_Columbia | Field/RemoteSensing       | O. tshawytscha                        | Marine                 | Predators                               | Mortality                     | Species_interactions,              | Demography             |
| 646             | 2to5     | East_North_America          | NA                                                                 | Field/RemoteSensing       | S. salar                              | Juvenile               | Management, Temperature_FW              | Carryover, Mortality          | Environment, , Management          | Demography             |
| 647             | NA       | Northwest                   | Northwest_Columbia                                                 | Model, Projections/salmon | O. mykiss                             | Juvenile               | Prey, Temperature_FW                    | Growth, Physiology_Condition  | Species_interactions, Environment, | Physiology             |

| Citation number | Duration | Region                   | Subregion                   | Type of study                     | Species                             | Life stage            | Driver                                              | Response                                           | Driver Process                        | Response Process          |
|-----------------|----------|--------------------------|-----------------------------|-----------------------------------|-------------------------------------|-----------------------|-----------------------------------------------------|----------------------------------------------------|---------------------------------------|---------------------------|
| 648             | NA       | East_North_America       | NA                          | Review/<br>MetaAnalysis           | S. salar                            | Marine                | Ecosystem,<br>Environment                           | Habitat_Distribution,<br>Population_resilience     | Species_interactions,<br>Environment, | Dispersal,<br>Demography  |
| 649             | 1        | Europe                   | NA                          | Lab/<br>Experimental              | S. salar                            | Juvenile              | Environment,<br>Temperature_<br>FW                  | Growth                                             | Environment,                          | Physiology                |
| 650             | 1        | Northwest                | Northwest_Columbia          | Field/<br>RemoteSensing           | O. mykiss, O.<br>tshawytscha        | Outmigration          | Habitat                                             | Behaviour,<br>Habitat_Distribution,<br>Mortality   | Environment,                          | Dispersal,<br>Demography  |
| 651             | 2to5     | Northwest                | Northwest_Columbia          | Field/<br>RemoteSensing           | O. tshawytscha                      | Juvenile              | Temperature_<br>FW                                  | Carryover, Growth,<br>Maturation, Mortality        | Environment,                          | Demography,<br>Physiology |
| 652             | 1        | East_North_America       | NA                          | Lab/<br>Experimental              | O. mykiss                           | Juvenile              | Genetics,<br>Temperature_<br>FW                     | Growth,<br>Physiology_Condition                    | Evolution,<br>Environment,            | Physiology                |
| 653             | 1        | Northwest                | Northwest_Columbia          | Lab/<br>Experimental              | O. tshawytscha                      | Juvenile              | Density_Food,<br>Prey                               | Growth                                             | Species_interactions,                 | Physiology                |
| 654             | 1        | British_Columbia         | British_Columbia_not_Fraser | Field/<br>RemoteSensing           | O. tshawytscha                      | Upmigration           | Flow, Habitat,<br>Temperature_<br>FW                | Behaviour,<br>Performance,<br>Physiology_Condition | Environment,                          | Dispersal,<br>Physiology  |
| 655             | NA       | NA                       | NA                          | Review/<br>MetaAnalysis           | General                             | Juvenile              | Acidity                                             | NA                                                 | Environment,                          | NA                        |
| 656             | 2to5     | British_Columbia         | British_Columbia_not_Fraser | Field/<br>RemoteSensing,<br>Model | O. tshawytscha                      | Upmigration           | Habitat,<br>Temperature_<br>FW                      | Behaviour,<br>Physiology_Condition                 | Environment,                          | Dispersal,<br>Physiology  |
| 657             | NA       | NA                       | NA                          | Review/<br>MetaAnalysis           | General,<br>Salmonid_<br>general    | Evolution             | Temperature_<br>FW                                  | Performance,<br>Physiology_Condition               | Environment,                          | Physiology                |
| 658             | NA       | NA                       | NA                          | Model                             | Other_fish,<br>Salmonid_<br>general | General,<br>Juvenile  | Temperature_<br>FW                                  | Performance,<br>Physiology_Condition               | Environment,                          | Physiology                |
| 659             | NA       | California,<br>Northwest | NA                          | Review/<br>MetaAnalysis           | Other_fish                          | General,<br>Juvenile  | Invasives                                           | NA                                                 | Species_interactions,                 | NA                        |
| 660             | 10plus   | Northwest                | Northwest_Columbia          | Projections/<br>physical          | O. tshawytscha                      | Juvenile,<br>Spawning | Flow, Habitat,<br>Management,<br>Temperature_<br>FW | Habitat_Distribution                               | Environment, ,<br>Management          | Dispersal                 |
| 661             | 1        | Europe                   | NA                          | Lab/<br>Experimental              | Other_species                       | Marine                | Acidity                                             | NA                                                 | Environment,                          | NA                        |

| Citation number | Duration | Region                | Subregion                   | Type of study                 | Species                   | Life stage             | Driver                                                            | Response                                                            | Driver Process                                  | Response Process                  |
|-----------------|----------|-----------------------|-----------------------------|-------------------------------|---------------------------|------------------------|-------------------------------------------------------------------|---------------------------------------------------------------------|-------------------------------------------------|-----------------------------------|
| 662             | NA       | Northwest             | Northwest_Columbia          | Model, Projections/<br>salmon | O. tshawytscha            | Juvenile               | Invasives, Predators, Temperature_FW                              | Behaviour, Habitat_Distribution, Life_history, Mortality, Phenology | Species_interactions, Environment,              | Dispersal, Demography             |
| 663             | 10plus   | Northwest             | Northwest_Columbia          | Field/ RemoteSensing          | O. tshawytscha            | Spawning               | Flow, Temperature_FW                                              | Phenology                                                           | Environment,                                    | Demography                        |
| 664             | NA       | NA                    | NA                          | Theoretical/ Opinion          | General                   | Juvenile               | Flow, Habitat, Management                                         | NA                                                                  | Environment, , Management                       | NA                                |
| 665             | NA       | NA                    | NA                          | Review/ MetaAnalysis          | Salmonid_general          | Egg, Juvenile          | Flow, Management                                                  | Mortality                                                           | Environment, , Management                       | Demography                        |
| 666             | 6to10    | Australia_New Zealand | NA                          | Field/ RemoteSensing          | S. trutta                 | Juvenile               | Density_Food, Flow, Management                                    | Growth, Mortality                                                   | Species_interactions, Environment, , Management | Demography, Physiology            |
| 667             | 2to5     | Northwest             | Northwest_Puget_Sound       | Field/ RemoteSensing          | O. tshawytscha            | Marine                 | Habitat                                                           | Habitat_Distribution, Phenology                                     | Environment,                                    | Dispersal, Demography             |
| 668             | NA       | Largescale            | NA                          | Review/ MetaAnalysis          | O. mykiss, S. salar       | Marine                 | NA                                                                | Behaviour, Habitat_Distribution, Life_history, Phenology            |                                                 | Dispersal, Demography             |
| 669             | 6to10    | California            | California_S                | Field/ RemoteSensing          | O. mykiss                 | Juvenile, Outmigration | Habitat                                                           | Growth, Habitat_Distribution, Phenology                             | Environment,                                    | Dispersal, Demography, Physiology |
| 670             | NA       | Largescale            | NA                          | Model, Projections/ ecosystem | Other_fish, Other_species | Marine                 | Ecosystem, Environment, Habitat, Predators, Temperature_marine    | Habitat_Distribution                                                | Species_interactions, Environment,              | Dispersal                         |
| 671             | NA       | British_Columbia      | British_Columbia_not_Fraser | Model, Theoretical/ Opinion   | O. nerka                  | General                | Density_Food, Predators, Prey, Temperature_FW, Temperature_marine | Carryover, Growth, Mortality, Population_resilience                 | Species_interactions, Environment,              | Demography, Physiology            |

| Citation number | Duration | Region        | Subregion          | Type of study                      | Species                                  | Life stage                  | Driver                                                           | Response                                                     | Driver Process                             | Response Process          |
|-----------------|----------|---------------|--------------------|------------------------------------|------------------------------------------|-----------------------------|------------------------------------------------------------------|--------------------------------------------------------------|--------------------------------------------|---------------------------|
| 672             | NA       | Europe        | NA                 | Review/<br>MetaAnalysis            | General,<br>Other_fish,<br>Other_species | Marine                      | Acidity,<br>Ecosystem,<br>Environment,<br>Temperature_<br>marine | Phenology,<br>Population_resilience                          | Species_interactions,<br>Environment,      | Demography                |
| 673             | 2to5     | Largescale    | NA                 | Field/<br>RemoteSensing            | O. tshawytscha                           | Evolution                   | Environment,<br>Genetics,<br>Habitat,<br>Temperature_<br>FW      | Genetics_Adaptation                                          | Evolution,<br>Environment,                 | Evolution                 |
| 674             | 2to5     | Northwest     | Northwest_Columbia | Field/<br>RemoteSensing            | O. clarkii                               | Freshwater_habitat, General | Habitat                                                          | Habitat_Distribution,<br>Life_history                        | Environment,                               | Dispersal,<br>Demography  |
| 675             | NA       | Europe        | NA                 | Model,<br>Projections/<br>salmon   | S. salar                                 | Juvenile                    | Environment,<br>Flow,<br>Temperature_<br>FW                      | Growth, Phenology,<br>Population_resilience,<br>Productivity | Environment,                               | Demography,<br>Physiology |
| 676             | 2to5     | Northwest     | Northwest_Columbia | Field/<br>RemoteSensing            | O. tshawytscha                           | Juvenile,<br>Outmigration   | Habitat,<br>Temperature_<br>FW                                   | Life_history, Phenology                                      | Environment,                               | Demography                |
| 677             | 1        | Europe        | NA                 | Lab/<br>Experimental               | S. salar                                 | Juvenile                    | NA                                                               | Behaviour,<br>Habitat_Distribution                           |                                            | Dispersal                 |
| 678             | 10plus   | Europe        | NA                 | Field/<br>RemoteSensing            | S. salar, S. trutta                      | Freshwater_habitat          | Flow, Habitat,<br>Management,<br>Temperature_<br>FW              | NA                                                           | Environment, ,<br>Management               | NA                        |
| 679             | NA       | Largescale    | NA                 | Model,<br>Projections/<br>physical | General                                  | Freshwater_habitat          | Environment,<br>Habitat,<br>Temperature_<br>FW                   | NA                                                           | Environment,                               | NA                        |
| 680             | 2to5     | Mountain_west | NA                 | Field/<br>RemoteSensing            | O. clarkii, O. mykiss                    | Juvenile                    | Genetics,<br>Habitat,<br>Management,<br>Temperature_<br>FW       | NA                                                           | Evolution,<br>Environment, ,<br>Management | NA                        |
| 681             | NA       | Northwest     | Northwest_Columbia | Model,<br>Projections/<br>salmon   | O. clarkii, S. confluentus               | Juvenile                    | Habitat,<br>Temperature_<br>FW                                   | Habitat_Distribution                                         | Environment,                               | Dispersal                 |



| Citation number | Duration | Region                 | Subregion                       | Type of study                                    | Species                                     | Life stage                       | Driver                                                             | Response                               | Driver Process                                        | Response Process          |
|-----------------|----------|------------------------|---------------------------------|--------------------------------------------------|---------------------------------------------|----------------------------------|--------------------------------------------------------------------|----------------------------------------|-------------------------------------------------------|---------------------------|
| 682             | 2to5     | California             | California_CV                   | Field/<br>RemoteSensing                          | O. tshawytscha                              | Juvenile,<br>Outmigration        | Flow, Habitat,<br>Temperature_<br>FW                               | Mortality                              | Environment,                                          | Demography                |
| 683             | 10plus   | California             | California_CV                   | Field/<br>RemoteSensing                          | O. tshawytscha                              | Marine                           | Environment,<br>Habitat                                            | Growth, Mortality                      | Environment,                                          | Demography,<br>Physiology |
| 684             | NA       | Largescale             | NA                              | Model,<br>Projections/<br>ecosystem              | General                                     | Marine                           | Ecosystem,<br>Environment,<br>Fisheries,<br>Temperature_<br>marine | NA                                     | Species_interactions,<br>Environment, ,<br>Management | NA                        |
| 685             | 2to5     | California             | California_CV                   | Field/<br>RemoteSensing                          | O. tshawytscha                              | Juvenile                         | Contaminants,<br>Habitat                                           | Growth                                 | Environment,                                          | Physiology                |
| 686             | NA       | California             | California_CV                   | Review/<br>MetaAnalysis                          | O. kisutch, O.<br>mykiss, O.<br>tshawytscha | General                          | Habitat,<br>Management                                             | Population_resilience,<br>Productivity | Environment, ,<br>Management                          | Demography                |
| 687             | 1        | East_North_A<br>merica | NA                              | Field/<br>RemoteSensing,<br>Lab/<br>Experimental | S. fontinalis, S.<br>trutta                 | Juvenile                         | Density_Food,<br>Temperature_<br>FW                                | Growth                                 | Species_interactions,<br>Environment,                 | Physiology                |
| 688             | 1        | Largescale             | NA                              | Field/<br>RemoteSensing                          | O. tshawytscha                              | Marine                           | Prey,<br>Temperature_<br>FW                                        | Diet                                   | Species_interactions,<br>Environment,                 | Species_interactio<br>ns  |
| 689             | 2to5     | Northwest              | Northwest_Col<br>umbia          | Field/<br>RemoteSensing                          | O. tshawytscha                              | Upmigration                      | Genetics                                                           | Phenology                              | Evolution,                                            | Demography                |
| 690             | NA       | NA                     | NA                              | Review/<br>MetaAnalysis                          | Salmonid_<br>general                        | Freshwater_ha<br>bitat, Juvenile | Habitat,<br>Management,<br>Temperature_<br>FW                      | Performance,<br>Physiology_Condition   | Environment, ,<br>Management                          | Physiology                |
| 691             | NA       | NA                     | NA                              | Review/<br>MetaAnalysis                          | General                                     | Marine                           | Acidity                                                            | Physiology_Condition                   | Environment,                                          | Physiology                |
| 692             | 1        | Europe                 | NA                              | Lab/<br>Experimental                             | S. salar                                    | Juvenile,<br>Marine              | Temperature_<br>FW                                                 | Growth,<br>Physiology_Condition        | Environment,                                          | Physiology                |
| 693             | NA       | NA                     | NA                              | Model,<br>Theoretical/<br>Opinion                | General                                     | Juvenile                         | Flow,<br>Management,<br>Methods                                    | Population_resilience                  | Environment, ,<br>Management                          | Demography                |
| 694             | 10plus   | British_Colum<br>bia   | British_Columb<br>ia_not_Fraser | Field/<br>RemoteSensing                          | O. nerka                                    | General                          | Habitat,<br>Management                                             | Population_resilience,<br>Productivity | Environment, ,<br>Management                          | Demography                |

| Citation number | Duration | Region           | Subregion                   | Type of study           | Species                  | Life stage                                | Driver                                             | Response                                          | Driver Process                                     | Response Process                  |
|-----------------|----------|------------------|-----------------------------|-------------------------|--------------------------|-------------------------------------------|----------------------------------------------------|---------------------------------------------------|----------------------------------------------------|-----------------------------------|
| 695             | NA       | NA               | NA                          | Review/<br>MetaAnalysis | General                  | General                                   | Ecosystem,<br>Environment                          | NA                                                | Species_interactions, NA<br>Environment,           |                                   |
| 696             | 1        | Mountain_west    | NA                          | Field/<br>RemoteSensing | O. clarkii               | Freshwater_habitat, Juvenile, Upmigration | Habitat, Management, Temperature_FW                | Habitat_Distribution                              | Environment, ,<br>Management                       | Dispersal                         |
| 697             | NA       | British_Columbia | British_Columbia_Fraser     | Review/<br>MetaAnalysis | O. nerka, O. tshawytscha | Upmigration                               | Temperature_FW                                     | Immune, Mortality, Physiology_Condition           | Environment,                                       | Demography, Physiology            |
| 698             | NA       | British_Columbia | British_Columbia_Fraser     | Review/<br>MetaAnalysis | O. nerka                 | Spawning, Upmigration                     | Disease, Temperature_FW                            | Behaviour, Mortality                              | Species_interactions, Environment,                 | Dispersal, Demography             |
| 699             | 10plus   | Northwest        | Northwest_Columbia          | Field/<br>RemoteSensing | O. tshawytscha           | Freshwater_habitat, Population            | Density_Food, Habitat                              | Population_resilience, Productivity               | Species_interactions, Environment,                 | Demography                        |
| 700             | 10plus   | Northwest        | Northwest_Columbia          | Field/<br>RemoteSensing | Other_fish               | Freshwater_habitat, Juvenile              | Flow, Invasives, Management, Temperature_FW        | Habitat_Distribution, Productivity                | Species_interactions, Environment, ,<br>Management | Dispersal, Demography             |
| 701             | 10plus   | British_Columbia | British_Columbia_not_Fraser | Field/<br>RemoteSensing | Other_species            | Marine                                    | Climate_indices, Ecosystem, Environment, Predators | Productivity                                      | Species_interactions, Environment,                 | Demography                        |
| 702             | NA       | Northwest        | Northwest_Columbia          | Theoretical/<br>Opinion | Salmonid_general         | Freshwater_habitat                        | Management, Restoration                            | Genetics_Adaptation                               | , Management                                       | Evolution*                        |
| 703             | 1        | Europe           | NA                          | Lab/<br>Experimental    | S. salar                 | Juvenile                                  | Temperature_FW                                     | Performance, Physiology_Condition                 | Environment,                                       | Physiology                        |
| 704             | 1        | Europe           | NA                          | Field/<br>RemoteSensing | S. trutta                | Upmigration                               | Environment, Temperature_FW                        | Phenology                                         | Environment,                                       | Demography                        |
| 705             | 6to10    | British_Columbia | British_Columbia_Fraser     | Field/<br>RemoteSensing | O. mykiss                | Juvenile                                  | Density_Food, Flow, Management                     | Habitat_Distribution                              | Species_interactions, Environment, ,<br>Management | Dispersal                         |
| 706             | 2to5     | California       | California_N                | Field/<br>RemoteSensing | O. mykiss                | General                                   | NA                                                 | Behaviour, Life_history, Maturation, Productivity |                                                    | Dispersal, Demography, Physiology |

| Citation number | Duration | Region               | Subregion                   | Type of study                       | Species              | Life stage                              | Driver                                              | Response                                              | Driver Process                                        | Response Process          |
|-----------------|----------|----------------------|-----------------------------|-------------------------------------|----------------------|-----------------------------------------|-----------------------------------------------------|-------------------------------------------------------|-------------------------------------------------------|---------------------------|
| 707             | NA       | NA                   | NA                          | Review/<br>MetaAnalysis             | Salmonid_<br>general | Freshwater_ha<br>bitat,<br>Outmigration | Contaminants,<br>Disease,<br>Habitat,<br>Management | NA                                                    | Species_interactions,<br>Environment, ,<br>Management | NA                        |
| 708             | 1        | Europe               | NA                          | Lab/<br>Experimental                | S. salar             | Juvenile                                | Acidity                                             | Physiology_Condition                                  | Environment, ,                                        | Physiology                |
| 709             | 1        | Europe               | NA                          | Lab/<br>Experimental                | S. salar             | Juvenile                                | Acidity,<br>Contaminants                            | Physiology_Condition                                  | Environment, ,                                        | Physiology                |
| 710             | NA       | Alaska               | Alaska_W                    | Model,<br>Projections/<br>ecosystem | General              | General                                 | Ecosystem,<br>Fisheries,<br>Management              | Livelihood,<br>Population_resilience,<br>Productivity | Species_interactions,<br>, Management                 | Demography,<br>Management |
| 711             | 2to5     | California           | California_CV               | Field/<br>RemoteSensing             | O. tshawytscha       | Juvenile                                | Density_Food,<br>Habitat,<br>Management             | Growth, Mortality                                     | Species_interactions,<br>Environment, ,<br>Management | Demography,<br>Physiology |
| 712             | 6to10    | Northwest            | Northwest_Col<br>umbia      | Field/<br>RemoteSensing             | O. tshawytscha       | Juvenile,<br>Marine                     | Flow,<br>Management,<br>Temperature_<br>FW          | Carryover, Mortality                                  | Environment, ,<br>Management                          | Demography                |
| 713             | NA       | British_Colum<br>bia | British_Columb<br>ia_Fraser | Model                               | O. nerka             | Population                              | Fisheries,<br>Management,<br>Methods                | Productivity                                          | , Management                                          | Demography                |
| 714             | 1        | Japan                | NA                          | Field/<br>RemoteSensing             | O. keta              | Marine,<br>Outmigration                 | Management,<br>Temperature_<br>marine               | Growth, Mortality                                     | Environment, ,<br>Management                          | Demography,<br>Physiology |
| 715             | 10plus   | Japan                | NA                          | Field/<br>RemoteSensing             | O. keta              | Marine                                  | Temperature_<br>FW,<br>Temperature_<br>marine       | Growth, Mortality                                     | Environment, ,                                        | Demography,<br>Physiology |
| 716             | NA       | Northwest            | Northwest_Col<br>umbia      | Model,<br>Projections/<br>salmon    | O. tshawytscha       | Population                              | Flow, Habitat,<br>Management,<br>Temperature_<br>FW | Mortality,<br>Population_resilience                   | Environment, ,<br>Management                          | Demography                |
| 717             | 1        | Europe               | NA                          | Field/<br>RemoteSensing             | S. salar             | Outmigration                            | Flow, Habitat,<br>Management                        | Mortality                                             | Environment, ,<br>Management                          | Demography                |

| Citation number | Duration | Region                   | Subregion                   | Type of study                      | Species        | Life stage                          | Driver                                                                  | Response                                            | Driver Process                                       | Response Process                        |
|-----------------|----------|--------------------------|-----------------------------|------------------------------------|----------------|-------------------------------------|-------------------------------------------------------------------------|-----------------------------------------------------|------------------------------------------------------|-----------------------------------------|
| 718             | 10plus   | Europe                   | NA                          | Field/<br>RemoteSensing            | S. salar       | Population                          | Density_Food,<br>Flow,<br>Temperature_<br>FW,<br>Temperature_<br>marine | Productivity                                        | Species_interactions,<br>Environment,                | Demography                              |
| 719             | NA       | NA                       | NA                          | Review/<br>MetaAnalysis            | General        | General                             | Acidity,<br>Contaminants,<br>Temperature_<br>FW                         | Performance,<br>Physiology_Condition                | Environment,                                         | Physiology                              |
| 720             | NA       | Japan                    | NA                          | Model                              | O. masou       | Evolution,<br>Juvenile,<br>Spawning | Density_Food,<br>Temperature_<br>FW                                     | Genetics_Adaptation,<br>Life_history,<br>Maturation | Species_interactions,<br>Environment,                | Demography,<br>Evolution,<br>Physiology |
| 721             | 2to5     | Europe                   | NA                          | Field/<br>RemoteSensing            | S. salar       | General                             | Genetics,<br>Habitat,<br>Temperature_<br>marine                         | Habitat_Distribution,<br>Population_resilience      | Evolution,<br>Environment,                           | Dispersal,<br>Demography                |
| 722             | 1        | Mountain_west            | NA                          | Lab/<br>Experimental               | Other_species  | Juvenile                            | Density_Food,<br>Genetics,<br>Temperature_<br>FW                        | NA                                                  | Species_interactions,<br>Evolution*,<br>Environment, | NA                                      |
| 723             | 1        | Asia_other               | NA                          | Lab/<br>Experimental               | O. mykiss      | Juvenile                            | Dissolved_oxygen                                                        | Physiology_Condition                                | Environment,                                         | Physiology                              |
| 724             | 2to5     | British_Columbia         | British_Columbia_not_Fraser | Lab/<br>Experimental               | O. tshawytscha | Evolution                           | Dissolved_oxygen,<br>Temperature_<br>FW                                 | Physiology_Condition                                | Environment,                                         | Physiology                              |
| 725             | 10plus   | Northwest                | Northwest_Puget_Sound       | Field/<br>RemoteSensing            | O. nerka       | Juvenile                            | Density_Food,<br>Prey,<br>Temperature_<br>FW                            | Growth, Phenology                                   | Species_interactions,<br>Environment,                | Demography,<br>Physiology               |
| 726             | NA       | California,<br>Northwest | NA                          | Model,<br>Projections/<br>physical | General        | Marine                              | Acidity,<br>Dissolved_oxygen,<br>Ecosystem,<br>Temperature_<br>marine   | NA                                                  | Species_interactions,<br>Environment,                | NA                                      |

| Citation number | Duration | Region                | Subregion                              | Type of study              | Species                       | Life stage                   | Driver                                             | Response                         | Driver Process                                  | Response Process       |
|-----------------|----------|-----------------------|----------------------------------------|----------------------------|-------------------------------|------------------------------|----------------------------------------------------|----------------------------------|-------------------------------------------------|------------------------|
| 727             | NA       | Europe                | NA                                     | Model                      | General                       | Marine                       | Ecosystem, Environment, Fisheries, Management      | NA                               | Species_interactions, Environment, , Management | NA                     |
| 728             | 10plus   | Northwest             | Northwest_Columbia                     | Field/RemoteSensing        | S. confluentus, S. fontinalis | Freshwater_habitat, Juvenile | Invasives, Temperature_FW                          | Habitat_Distribution             | Species_interactions, Environment,              | Dispersal              |
| 729             | 2to5     | Europe                | NA                                     | Field/RemoteSensing        | S. salar, S. trutta           | Freshwater_habitat           | Habitat, Temperature_FW                            | NA                               | Environment,                                    | NA                     |
| 730             | NA       | California, Northwest | California_N, Northwest_Columbia       | Model                      | O. mykiss, O. tshawytscha     | Population, Upmigration      | Management, Methods, Temperature_FW                | Mortality, Population_resilience | Environment, , Management                       | Demography             |
| 731             | 1        | California            | California_S                           | Field/RemoteSensing        | O. mykiss                     | Juvenile                     | Acidity, Dissolved_oxygen, Habitat, Temperature_FW | Behaviour, Habitat_Distribution  | Environment,                                    | Dispersal              |
| 732             | NA       | NA                    | NA                                     | Model, Theoretical/Opinion | General                       | Juvenile                     | Density_Food, Temperature_FW                       | Growth, Physiology_Condition     | Species_interactions, Environment,              | Physiology             |
| 733             | 2to5     | Northwest             | Northwest_Columbia                     | Field/RemoteSensing        | O. mykiss, O. tshawytscha     | Juvenile                     | Habitat, Management                                | Mortality                        | Environment, , Management                       | Demography             |
| 734             | 2to5     | Northwest             | Northwest_Columbia, Northwest_Columbia | Field/RemoteSensing        | General                       | Juvenile                     | Invasives, Predators                               | Habitat_Distribution             | Species_interactions,                           | Dispersal              |
| 735             | 2to5     | Alaska                | Alaska_W                               | Field/RemoteSensing        | Other_fish                    | Freshwater_habitat           | Habitat                                            | Habitat_Distribution             | Environment,                                    | Dispersal              |
| 736             | 1        | Europe                | NA                                     | Field/RemoteSensing        | S. salar                      | Outmigration                 | Methods                                            | Phenology, Physiology_Condition  |                                                 | Demography, Physiology |
| 737             | NA       | NA                    | NA                                     | Model                      | General                       | Juvenile, Population         | Density_Food, Flow, Temperature_FW                 | Productivity                     | Species_interactions, Environment,              | Demography             |
| 738             | 1        | Alaska                | Alaska_W                               | Field/RemoteSensing        | O. tshawytscha                | Juvenile                     | Density_Food, Habitat, Prey                        | Growth, Habitat_Distribution     | Species_interactions, Environment,              | Dispersal, Physiology  |

| Citation number | Duration | Region                 | Subregion                                           | Type of study           | Species                  | Life stage            | Driver                                                                                        | Response                             | Driver Process             | Response Process                   |
|-----------------|----------|------------------------|-----------------------------------------------------|-------------------------|--------------------------|-----------------------|-----------------------------------------------------------------------------------------------|--------------------------------------|----------------------------|------------------------------------|
| 739             | 10plus   | Alaska                 | Alaska_W                                            | Field/<br>RemoteSensing | O. tshawytscha           | Spawning              | Density_Food                                                                                  | Behaviour,<br>Habitat_Distribution   | Species_interactions,      | Dispersal                          |
| 740             | NA       | Largescale             | NA                                                  | Field/<br>RemoteSensing | S. salar                 | Marine                | Disease,<br>Temperature_<br>marine                                                            | NA                                   | Species_interactions,      | NA<br>Environment,                 |
| 741             | 2to5     | Northwest              | Northwest_Co<br>astal,<br>Northwest_Pu<br>get_Sound | Lab/<br>Experimental    | Other_fish               | Marine                | Acidity                                                                                       | Growth, Phenology                    | Environment,               | Demography,<br>Physiology          |
| 742             | 2to5     | Alaska                 | Alaska_S                                            | Field/<br>RemoteSensing | Other_fish               | Juvenile,<br>Marine   | Genetics,<br>Temperature_<br>FW                                                               | Growth                               | Evolution,<br>Environment, | Physiology                         |
| 743             | NA       | Largescale             | NA                                                  | Review/<br>MetaAnalysis | General                  | Marine                | Acidity,<br>Ecosystem,<br>Environment,<br>Fisheries,<br>Management,<br>Temperature_<br>marine | NA                                   | Species_interactions,      | NA<br>Environment, ,<br>Management |
| 744             | 10plus   | Northwest              | Northwest_Col<br>umbia                              | Field/<br>RemoteSensing | O. tshawytscha           | Upmigration           | Temperature_<br>marine                                                                        | Productivity                         | Environment,               | Demography                         |
| 745             | 10plus   | Europe                 | NA                                                  | Field/<br>RemoteSensing | S. salar                 | Marine,<br>Population | Climate_indice<br>s                                                                           | Productivity                         | Environment,               | Demography                         |
| 746             | 1        | Europe                 | NA                                                  | Lab/<br>Experimental    | S. salar                 | Marine                | NA                                                                                            | Performance,<br>Physiology_Condition |                            | Physiology                         |
| 747             | 10plus   | Europe                 | NA                                                  | Field/<br>RemoteSensing | S. salar                 | Egg, Juvenile         | Flow                                                                                          | Mortality, Productivity              | Environment,               | Demography                         |
| 748             | 2to5     | California             | California_N                                        | Field/<br>RemoteSensing | O. kisutch, O.<br>mykiss | Juvenile              | Flow                                                                                          | Mortality                            | Environment,               | Demography                         |
| 749             | 10plus   | Northwest              | Northwest_Col<br>umbia                              | Field/<br>RemoteSensing | O. nerka                 | Juvenile              | Density_Food,<br>Ecosystem,<br>Prey                                                           | Growth, Productivity                 | Species_interactions,      | Demography,<br>Physiology          |
| 750             | 1        | East_North_A<br>merica | NA                                                  | Lab/<br>Experimental    | S. salar                 | Marine                | Temperature_<br>FW                                                                            | Mortality,<br>Physiology_Condition   | Environment,               | Demography,<br>Physiology          |
| 751             | 2to5     | Europe                 | NA                                                  | Field/<br>RemoteSensing | Salmonid_<br>general     | Juvenile              | Habitat,<br>Temperature_<br>FW                                                                | NA                                   | Environment,               | NA                                 |
| 752             | 1        | Japan                  | NA                                                  | Lab/<br>Experimental    | O. mykiss                | Evolution             | Temperature_<br>FW                                                                            | Performance,<br>Physiology_Condition | Environment,               | Physiology                         |

| Citation number | Duration | Region                       | Subregion                                                         | Type of study                                              | Species                                     | Life stage                                 | Driver                                        | Response                                       | Driver Process               | Response Process          |
|-----------------|----------|------------------------------|-------------------------------------------------------------------|------------------------------------------------------------|---------------------------------------------|--------------------------------------------|-----------------------------------------------|------------------------------------------------|------------------------------|---------------------------|
| 753             | 1        | Japan                        | NA                                                                | Lab/<br>Experimental                                       | O. mykiss                                   | Juvenile                                   | Temperature_<br>FW                            | Performance,<br>Physiology_Condition           | Environment,                 | Physiology                |
| 754             | NA       | Largescale                   | NA                                                                | Review/<br>MetaAnalysis                                    | General                                     | Freshwater_ha<br>bitat, General,<br>Marine | Management                                    | NA                                             | , Management                 | NA                        |
| 755             | 10plus   | Largescale                   | NA                                                                | Field/<br>RemoteSensing                                    | O. gorbuscha                                | Marine,<br>Population                      | Density_Food                                  | Productivity                                   | Species_interactions,        | Demography                |
| 756             | 10plus   | Northwest                    | Northwest_Col<br>umbia                                            | Field/<br>RemoteSensing                                    | General                                     | Freshwater_ha<br>bitat                     | Temperature_<br>FW                            | Habitat_Distribution                           | Environment,                 | Dispersal                 |
| 757             | 10plus   | Mountain_we<br>st            | NA                                                                | Field/<br>RemoteSensing,<br>Model, Review/<br>MetaAnalysis | O. clarkii, O.<br>mykiss, S.<br>confluentus | General                                    | Flow,<br>Temperature_<br>FW                   | Habitat_Distribution                           | Environment,                 | Dispersal                 |
| 758             | 10plus   | Northwest                    | Northwest_Col<br>umbia                                            | Field/<br>RemoteSensing                                    | O. mykiss, S.<br>confluentus                | Freshwater_ha<br>bitat                     | Habitat,<br>Temperature_<br>FW                | Habitat_Distribution                           | Environment,                 | Dispersal                 |
| 759             | 10plus   | Northwest                    | California_N,<br>Northwest_Co<br>astal,<br>Northwest_Col<br>umbia | Field/<br>RemoteSensing,<br>Projections/<br>salmon         | O. mykiss, O.<br>nerka, S. trutta           | Spawning,<br>Upmigration                   | Temperature_<br>FW                            | Habitat_Distribution,<br>Population_resilience | Environment,                 | Dispersal,<br>Demography  |
| 760             | 10plus   | Mountain_we<br>st, Northwest | Northwest_Co<br>astal,<br>Northwest_Col<br>umbia                  | Field/<br>RemoteSensing                                    | Salmonid_<br>general                        | Freshwater_ha<br>bitat                     | Temperature_<br>FW                            | Habitat_Distribution,<br>Population_resilience | Environment,                 | Dispersal,<br>Demography  |
| 761             | NA       | Northwest                    | Northwest_Col<br>umbia                                            | Theoretical/<br>Opinion                                    | O. mykiss, O.<br>nerka, O.<br>tshawytscha   | Juvenile,<br>Outmigration                  | Habitat,<br>Management                        | Mortality, Performance                         | Environment, ,<br>Management | Demography,<br>Physiology |
| 762             | NA       | NA                           | NA                                                                | Review/<br>MetaAnalysis                                    | General                                     | Juvenile                                   | Temperature_<br>FW,<br>Temperature_<br>marine | Growth,<br>Physiology_Condition                | Environment,                 | Physiology                |

| Citation number | Duration | Region                                                      | Subregion                              | Type of study                                  | Species                           | Life stage                    | Driver                                                          | Response                                               | Driver Process                     | Response Process      |
|-----------------|----------|-------------------------------------------------------------|----------------------------------------|------------------------------------------------|-----------------------------------|-------------------------------|-----------------------------------------------------------------|--------------------------------------------------------|------------------------------------|-----------------------|
| 763             | 1        | East_North_America                                          | NA                                     | Field/RemoteSensing                            | Other_fish                        | Marine                        | Dissolved_oxygen, Predators, Temperature_FW, Temperature_marine | Habitat_Distribution                                   | Species_interactions, Environment, | Dispersal             |
| 764             | NA       | Largescale                                                  | NA                                     | Review/MetaAnalysis                            | General                           | Juvenile, Marine, Upmigration | Acidity, Contaminants                                           | NA                                                     | Environment,                       | NA                    |
| 765             | 2to5     | Europe                                                      | NA                                     | Model                                          | General                           | Freshwater_habitat            | Habitat, Temperature_FW                                         | NA                                                     | Environment,                       | NA                    |
| 766             | 2to5     | Europe                                                      | NA                                     | Model                                          | S. salar                          | Freshwater_habitat            | Temperature_FW                                                  | NA                                                     | Environment,                       | NA                    |
| 767             | NA       | British_Columbia                                            | British_Columbia_Fraser                | Field/RemoteSensing                            | O. nerka                          | General                       | Fisheries                                                       | Livelihood                                             | , Management                       | Management            |
| 768             | 10plus   | Northwest                                                   | Northwest_Columbia                     | Field/RemoteSensing, Model, Projections/salmon | O. tshawytscha                    | Spawning                      | Density_Food, Environment, Flow, Habitat, Temperature_FW        | Habitat_Distribution                                   | Species_interactions, Environment, | Dispersal             |
| 769             | 10plus   | Europe                                                      | NA                                     | Field/RemoteSensing                            | S. salar                          | Marine, Population            | Fisheries                                                       | Habitat_Distribution, Mortality, Productivity          | , Management                       | Dispersal, Demography |
| 770             | NA       | British_Columbia, California, East_North_America, Northwest | NA                                     | Review/MetaAnalysis                            | General                           | Marine                        | Ecosystem, Methods                                              | NA                                                     | Species_interactions,              | NA                    |
| 771             | 10plus   | Northwest                                                   | Northwest_Columbia, Northwest_Columbia | Model, Projections/physical                    | General, Salmonid_general         | Freshwater_habitat            | Flow, Management, Temperature_FW                                | NA                                                     | Environment, , Management          | NA                    |
| 772             | NA       | Alaska                                                      | Alaska_S                               | Model                                          | O. gorbuscha, O. keta, O. kisutch | Juvenile                      | Habitat, Invasives, Predators                                   | Habitat_Distribution, Mortality, Population_resilience | Species_interactions, Environment, | Dispersal, Demography |



| Citation number | Duration | Region           | Subregion               | Type of study                                    | Species                                                              | Life stage                             | Driver                                                                        | Response                                       | Driver Process                                        | Response Process          |
|-----------------|----------|------------------|-------------------------|--------------------------------------------------|----------------------------------------------------------------------|----------------------------------------|-------------------------------------------------------------------------------|------------------------------------------------|-------------------------------------------------------|---------------------------|
| 773             | 1        | Europe           | NA                      | Lab/<br>Experimental                             | Other_fish                                                           | Egg, Spawning                          | Genetics,<br>Temperature_<br>FW                                               | Carryover,<br>Morphology, Mortality            | Evolution,<br>Environment,                            | Demography,<br>Physiology |
| 774             | NA       | NA               | NA                      | Model,<br>Theoretical/<br>Opinion                | General                                                              | Marine                                 | Fisheries,<br>Management,<br>Methods                                          | NA                                             | , Management                                          | NA                        |
| 775             | NA       | Europe           | NA                      | Field/<br>RemoteSensing                          | S. trutta                                                            | Evolution,<br>Juvenile,<br>Upmigration | Habitat,<br>Temperature_<br>FW                                                | Genetics_Adaptation,<br>Physiology_Condition   | Environment,                                          | Evolution*,<br>Physiology |
| 776             | 2to5     | California       | California_S            | Field/<br>RemoteSensing                          | O. mykiss                                                            | Juvenile                               | Methods,<br>Predators                                                         | Mortality                                      | Species_interactions,                                 | Demography                |
| 777             | 1        | California       | California_N            | Field/<br>RemoteSensing                          | O. kisutch, O.<br>tshawytscha,<br>Salmonid_<br>general               | Juvenile                               | Disease, Flow,<br>Management,<br>Temperature_<br>FW                           | NA                                             | Species_interactions,<br>Environment, ,<br>Management | NA                        |
| 778             | 1        | California       | California_CV           | Field/<br>RemoteSensing,<br>Lab/<br>Experimental | O. tshawytscha                                                       | Juvenile                               | Density_Food,<br>Ecosystem,<br>Environment,<br>Habitat,<br>Temperature_<br>FW | Growth                                         | Species_interactions,<br>Environment,                 | Physiology                |
| 779             | 10plus   | Largescale       | NA                      | Field/<br>RemoteSensing                          | O. gorbuscha, O.<br>keta, O. kisutch,<br>O. nerka, O.<br>tshawytscha | Population                             | Climate_indice<br>s,<br>Density_Food,<br>Fisheries                            | Growth, Maturation                             | Species_interactions,<br>Environment, ,<br>Management | Physiology                |
| 780             | 2to5     | British_Columbia | British_Columbia_Fraser | Lab/<br>Experimental                             | O. gorbuscha, O.<br>nerka                                            | Upmigration                            | Temperature_<br>FW                                                            | Maturation, Mortality,<br>Physiology_Condition | Environment,                                          | Demography,<br>Physiology |
| 781             | 1        | British_Columbia | British_Columbia_Fraser | Lab/<br>Experimental                             | O. gorbuscha, O.<br>nerka                                            | Upmigration                            | Temperature_<br>FW                                                            | Physiology_Condition                           | Environment,                                          | Physiology                |
| 782             | 1        | British_Columbia | British_Columbia_Fraser | Field/<br>RemoteSensing,<br>Lab/<br>Experimental | O. nerka                                                             | Upmigration                            | Temperature_<br>FW                                                            | Mortality,<br>Physiology_Condition             | Environment,                                          | Demography,<br>Physiology |
| 783             | 1        | Northwest        | Northwest_Columbia      | Field/<br>RemoteSensing                          | O. clarkii                                                           | Juvenile                               | Density_Food,<br>Habitat,<br>Temperature_<br>FW                               | Growth                                         | Species_interactions,<br>Environment,                 | Physiology                |

| Citation number | Duration | Region             | Subregion                   | Type of study           | Species                 | Life stage                  | Driver                                                             | Response                                     | Driver Process                        | Response Process          |
|-----------------|----------|--------------------|-----------------------------|-------------------------|-------------------------|-----------------------------|--------------------------------------------------------------------|----------------------------------------------|---------------------------------------|---------------------------|
| 784             | 10plus   | Europe             | NA                          | Field/<br>RemoteSensing | Other_fish, S. trutta   | Marine                      | Temperature_<br>FW,<br>Temperature_<br>marine                      | Growth, Mortality,<br>Phenology              | Environment,                          | Demography,<br>Physiology |
| 785             | 10plus   | Europe             | NA                          | Field/<br>RemoteSensing | S. salar                | Marine                      | Climate_indice<br>s,<br>Temperature_<br>marine                     | Growth                                       | Environment,                          | Physiology                |
| 786             | 10plus   | Europe             | NA                          | Field/<br>RemoteSensing | S. salar                | Marine                      | Genetics                                                           | Habitat_Distribution                         | Evolution,                            | Dispersal                 |
| 787             | 6to10    | Northwest          | Northwest_Columbia          | Field/<br>RemoteSensing | O. tshawytscha          | Upmigration                 | Fisheries,<br>Management                                           | Phenology                                    | , Management                          | Demography                |
| 788             | 6to10    | Europe             | NA                          | Field/<br>RemoteSensing | S. trutta               | Juvenile                    | Flow                                                               | Productivity                                 | Environment,                          | Demography                |
| 789             | NA       | British_Columbia   | British_Columbia_not_Fraser | Review/<br>MetaAnalysis | General, O. tshawytscha | Marine                      | Acidity,<br>Ecosystem,<br>Environment,<br>Prey                     | NA                                           | Species_interactions,<br>Environment, | NA                        |
| 790             | 1        | East_North_America | NA                          | Lab/<br>Experimental    | O. mykiss               | Juvenile                    | Density_Food,<br>Flow                                              | Growth, Performance,<br>Physiology_Condition | Species_interactions,<br>Environment, | Physiology                |
| 791             | 10plus   | California         | California_N                | Field/<br>RemoteSensing | Other_species           | Marine                      | Ecosystem,<br>Environment,<br>Predators,<br>Temperature_<br>marine | Productivity                                 | Species_interactions,<br>Environment, | Demography                |
| 792             | 2to5     | Northwest          | Northwest_Coastal           | Field/<br>RemoteSensing | Other_species           | Marine                      | Acidity,<br>Dissolved_oxygen,<br>Ecosystem,<br>Environment         | Habitat_Distribution                         | Species_interactions,<br>Environment, | Dispersal                 |
| 793             | 6to10    | Alaska             | Alaska_S,<br>Alaska_SE      | Field/<br>RemoteSensing | Salmonid_<br>general    | Freshwater_habitat, General | Fisheries,<br>Habitat                                              | NA                                           | Environment, ,<br>Management          | NA                        |
| 794             | NA       | Northwest          | Northwest_Columbia          | Field/<br>RemoteSensing | O. tshawytscha          | Evolution                   | Genetics                                                           | Genetics_Adaptation                          | Evolution,                            | Evolution                 |
| 795             | 2to5     | Northwest          | Northwest_Columbia          | Field/<br>RemoteSensing | O. clarkii              | Evolution                   | Habitat                                                            | Genetics_Adaptation,<br>Life_history         | Environment,                          | Demography,<br>Evolution  |
| 796             | 10plus   | Northwest          | Northwest_Columbia          | Field/<br>RemoteSensing | O. tshawytscha          | Population                  | Climate_indices                                                    | Growth, Maturation                           | Environment,                          | Physiology                |

| Citation number | Duration | Region                   | Subregion             | Type of study                     | Species                                     | Life stage                            | Driver                                                              | Response                                         | Driver Process                        | Response Process         |
|-----------------|----------|--------------------------|-----------------------|-----------------------------------|---------------------------------------------|---------------------------------------|---------------------------------------------------------------------|--------------------------------------------------|---------------------------------------|--------------------------|
| 797             | 10plus   | Alaska                   | Alaska_W              | Field/<br>RemoteSensing           | O. nerka                                    | Marine                                | Climate_indice<br>s,<br>Density_Food,<br>Prey                       | Productivity                                     | Species_interactions,<br>Environment, | Demography               |
| 798             | NA       | NA                       | NA                    | Theoretical/<br>Opinion           | General                                     | Freshwater_ha<br>bitat                | Habitat,<br>Methods,<br>Temperature_<br>FW                          | NA                                               | Environment,                          | NA                       |
| 799             | 1        | East_North_A<br>merica   | NA                    | Lab/<br>Experimental              | O. mykiss                                   | Juvenile                              | Temperature_<br>FW                                                  | Physiology_Condition                             | Environment,                          | Physiology               |
| 800             | 1        | East_North_A<br>merica   | NA                    | Lab/<br>Experimental              | S. salar                                    | Juvenile                              | Temperature_<br>FW                                                  | Growth, Immune,<br>Physiology_Condition          | Environment,                          | Physiology               |
| 801             | NA       | California,<br>Northwest | NA                    | Field/<br>RemoteSensing,<br>Model | General                                     | Freshwater_ha<br>bitat                | Flow, Habitat                                                       | NA                                               | Environment,                          | NA                       |
| 802             | 10plus   | Alaska                   | Alaska_S              | Field/<br>RemoteSensing           | O. tshawytscha                              | General,<br>Population                | Climate_indice<br>s,<br>Environment,<br>Flow,<br>Temperature_<br>FW | Productivity                                     | Environment,                          | Demography               |
| 803             | NA       | Northwest                | Northwest_Co<br>astal | Model                             | O. kisutch, O.<br>mykiss, O.<br>tshawytscha | Freshwater_ha<br>bitat,<br>Population | Flow, Habitat,<br>Restoration,<br>Temperature_<br>FW                | Habitat_Distribution,<br>Mortality, Productivity | Environment, ,<br>Management          | Dispersal,<br>Demography |
| 804             | 10plus   | Europe                   | NA                    | Field/<br>RemoteSensing           | S. salar                                    | Juvenile                              | Acidity,<br>Ecosystem                                               | Habitat_Distribution                             | Species_interactions,<br>Environment, | Dispersal                |
| 805             | 10plus   | Mountain_we<br>st        | NA                    | Field/<br>RemoteSensing,<br>Model | O. clarkii                                  | Population                            | Ecosystem,<br>Environment,<br>Temperature_<br>FW                    | Life_history,<br>Productivity                    | Species_interactions,<br>Environment, | Demography               |
| 806             | 10plus   | Europe                   | NA                    | Field/<br>RemoteSensing           | S. salar                                    | Marine,<br>Population                 | Temperature_<br>marine                                              | Habitat_Distribution,<br>Maturation              | Environment,                          | Dispersal,<br>Physiology |
| 807             | 2to5     | Europe                   | NA                    | Field/<br>RemoteSensing           | S. trutta                                   | Outmigration                          | Predators                                                           | Mortality                                        | Species_interactions,                 | Demography               |

| Citation number | Duration | Region                | Subregion                                     | Type of study                                  | Species                               | Life stage          | Driver                                                    | Response                                          | Driver Process                     | Response Process       |
|-----------------|----------|-----------------------|-----------------------------------------------|------------------------------------------------|---------------------------------------|---------------------|-----------------------------------------------------------|---------------------------------------------------|------------------------------------|------------------------|
| 808             | 2to5     | Northwest             | Northwest_Columbia                            | Field/RemoteSensing                            | Other_fish                            | Juvenile, Marine    | Ecosystem, Environment, Habitat, Prey, Temperature_marine | Habitat_Distribution, Phenology                   | Species_interactions, Environment, | Dispersal, Demography  |
| 809             | 6to10    | Europe                | NA                                            | Field/RemoteSensing                            | S. salar                              | Marine              | Dissolved_oxygen, Ecosystem, Temperature_marine           | Carryover, Growth, Mortality                      | Species_interactions, Environment, | Demography, Physiology |
| 810             | 2to5     | California            | California_N                                  | Lab/Experimental                               | O. mykiss                             | Population          | Genetics                                                  | Genetics_Adaptation, Population_resilience        | Evolution,                         | Demography, Evolution  |
| 811             | 10plus   | East_North_America    | NA                                            | Field/RemoteSensing, Model, Projections/salmon | O. mykiss, O. tshawytscha, Other_fish | Juvenile, Marine    | Density_Food, Prey, Temperature_FW                        | Growth, Physiology_Condition                      | Species_interactions, Environment, | Physiology             |
| 812             | NA       | California, Northwest | California_N, California_S, Northwest_Coastal | Model                                          | Other_fish                            | Marine              | Density_Food, Ecosystem                                   | NA                                                | Species_interactions,              | NA                     |
| 813             | NA       | NA                    | NA                                            | Model                                          | General                               | Population          | Genetics                                                  | Genetics_Adaptation, Population_resilience        | Evolution,                         | Demography, Evolution  |
| 814             | NA       | NA                    | NA                                            | Theoretical/Opinion                            | General                               | Population          | Genetics, Management                                      | Genetics_Adaptation                               | Evolution, , Management            | Evolution              |
| 815             | 1        | Europe                | NA                                            | Field/RemoteSensing                            | S. salar                              | Outmigration        | Habitat, Management                                       | Behaviour, Mortality                              | Environment, , Management          | Dispersal, Demography  |
| 816             | NA       | California            | California_N, California_S                    | Theoretical/Opinion                            | Salmonid_general                      | General, Population | Habitat, Management                                       | Population_resilience                             | Environment, , Management          | Demography             |
| 817             | 1        | Europe                | NA                                            | Lab/Experimental                               | Other_fish                            | Egg, Evolution      | Genetics, Habitat                                         | Genetics_Adaptation, Growth, Physiology_Condition | Evolution, Environment,            | Evolution, Physiology  |
| 818             | 2to5     | Largescale            | NA                                            | Lab/Experimental                               | Other_species                         | Marine              | Acidity                                                   | Physiology_Condition                              | Environment,                       | Physiology             |

| Citation number | Duration | Region             | Subregion          | Type of study       | Species                   | Life stage                      | Driver                                                          | Response                                   | Driver Process                                  | Response Process                  |
|-----------------|----------|--------------------|--------------------|---------------------|---------------------------|---------------------------------|-----------------------------------------------------------------|--------------------------------------------|-------------------------------------------------|-----------------------------------|
| 819             | 1        | Northwest          | Northwest_Columbia | Field/RemoteSensing | O. clarkii                | Juvenile                        | Density_Food, Habitat, Management, Predators, Prey, Restoration | Productivity                               | Species_interactions, Environment, , Management | Demography                        |
| 820             | 2to5     | Northwest          | Northwest_Columbia | Field/RemoteSensing | O. clarkii                | Juvenile                        | Flow, Temperature_FW                                            | Growth, Physiology_Condition, Productivity | Environment,                                    | Demography, Physiology            |
| 821             | 1        | Northwest          | Northwest_Columbia | Field/RemoteSensing | O. tshawytscha            | Juvenile                        | Environment, Habitat, Temperature_FW                            | Growth, Habitat_Distribution, Phenology    | Environment,                                    | Dispersal, Demography, Physiology |
| 822             | 2to5     | East_North_America | NA                 | Field/RemoteSensing | S. fontinalis             | Juvenile                        | Habitat, Temperature_FW                                         | Growth                                     | Environment,                                    | Physiology                        |
| 823             | NA       | NA                 | NA                 | Review/MetaAnalysis | General                   | Marine                          | Ecosystem, Fisheries, Methods                                   | NA                                         | Species_interactions, , Management              | NA                                |
| 824             | 2to5     | Northwest          | Northwest_Columbia | Field/RemoteSensing | O. mykiss, O. tshawytscha | Upmigration                     | Temperature_FW                                                  | Behaviour, Habitat_Distribution            | Environment,                                    | Dispersal                         |
| 825             | 2to5     | Northwest          | Northwest_Columbia | Field/RemoteSensing | O. tshawytscha            | Spawning, Upmigration           | Contaminants                                                    | Mortality                                  | Environment,                                    | Demography                        |
| 826             | 2to5     | Northwest          | Northwest_Columbia | Field/RemoteSensing | O. tshawytscha            | Spawning, Upmigration           | Management, Temperature_FW                                      | Mortality                                  | Environment, , Management                       | Demography                        |
| 827             | 2to5     | Northwest          | Northwest_Columbia | Field/RemoteSensing | O. tshawytscha            | Upmigration                     | Fisheries, Flow, Predators, Temperature_FW                      | Mortality                                  | Species_interactions, Environment, , Management | Demography                        |
| 828             | 2to5     | Northwest          | Northwest_Columbia | Field/RemoteSensing | O. mykiss, O. tshawytscha | Upmigration                     | Habitat, Temperature_FW                                         | Behaviour, Habitat_Distribution, Phenology | Environment,                                    | Dispersal, Demography             |
| 829             | 2to5     | Northwest          | Northwest_Columbia | Field/RemoteSensing | O. tshawytscha            | Juvenile, Spawning, Upmigration | Habitat, Temperature_FW                                         | Behaviour, Habitat_Distribution            | Environment,                                    | Dispersal                         |

| Citation number | Duration | Region             | Subregion                   | Type of study                         | Species                      | Life stage             | Driver                      | Response                                                         | Driver Process                     | Response Process                  |
|-----------------|----------|--------------------|-----------------------------|---------------------------------------|------------------------------|------------------------|-----------------------------|------------------------------------------------------------------|------------------------------------|-----------------------------------|
| 830             | 2to5     | Northwest          | Northwest_Columbia          | Field/RemoteSensing                   | O. tshawytscha               | Upmigration            | Temperature_FW              | Behaviour, Habitat_Distribution, Physiology_Condition            | Environment,                       | Dispersal, Physiology             |
| 831             | 1        | East_North_America | NA                          | Lab/Experimental                      | O. mykiss                    | Marine                 | Disease, Temperature_FW     | Performance, Physiology_Condition                                | Species_interactions, Environment, | Physiology                        |
| 832             | 1        | Europe             | NA                          | Field/RemoteSensing                   | O. mykiss                    | Juvenile               | Temperature_FW              | Physiology_Condition                                             | Environment,                       | Physiology                        |
| 833             | NA       | NA                 | NA                          | Review/MetaAnalysis                   | General                      | Marine                 | Acidity                     | Genetics_Adaptation, Physiology_Condition, Population_resilience | Environment,                       | Demography, Evolution, Physiology |
| 834             | 2to5     | NA                 | NA                          | Field/RemoteSensing, Lab/Experimental | Other_species                | Marine                 | Acidity                     | Genetics_Adaptation                                              | Environment,                       | Evolution                         |
| 835             | 10plus   | Europe             | NA                          | Field/RemoteSensing                   | Other_fish                   | Egg, Population        | Temperature_FW              | Mortality, Performance, Population_resilience                    | Environment,                       | Demography, Physiology            |
| 836             | 2to5     | California         | California_N                | Field/RemoteSensing                   | O. mykiss                    | Juvenile, Outmigration | Flow, Habitat               | Growth, Habitat_Distribution, Phenology                          | Environment,                       | Dispersal, Demography, Physiology |
| 837             | 2to5     | California         | California_N                | Field/RemoteSensing                   | O. mykiss                    | Population             | Flow, Genetics, Habitat     | Genetics_Adaptation                                              | Evolution, Environment,            | Evolution                         |
| 838             | 10plus   | Northwest          | Northwest_Columbia          | Field/RemoteSensing                   | O. gorbuscha, O. tshawytscha | Marine                 | Density_Food                | Mortality                                                        | Species_interactions,              | Demography                        |
| 839             | 2to5     | British_Columbia   | British_Columbia_not_Fraser | Field/RemoteSensing                   | O. keta, O. tshawytscha      | Marine, Outmigration   | Density_Food, Habitat, Prey | Diet, Habitat_Distribution                                       | Species_interactions, Environment, | Species_interactions, Dispersal   |
| 840             | 10plus   | Europe             | NA                          | Field/RemoteSensing                   | S. salar                     | Juvenile, Outmigration | Temperature_FW              | Carryover, Maturation, Mortality, Phenology                      | Environment,                       | Demography, Physiology            |

| Citation number | Duration | Region                      | Subregion                                          | Type of study                | Species                    | Life stage                  | Driver                                                                        | Response                                  | Driver Process                     | Response Process      |
|-----------------|----------|-----------------------------|----------------------------------------------------|------------------------------|----------------------------|-----------------------------|-------------------------------------------------------------------------------|-------------------------------------------|------------------------------------|-----------------------|
| 841             | NA       | British_Columbia, Northwest | British_Columbia_not_Fraser, Northwest_Puget_Sound | Model, Projections/ecosystem | Other_species              | Marine                      | Density_Food, Dissolved_oxygen, Ecosystem, Temperature_FW, Temperature_marine | NA                                        | Species_interactions, Environment, | NA                    |
| 842             | 2to5     | British_Columbia, Northwest | British_Columbia_not_Fraser, Northwest_Puget_Sound | Field/RemoteSensing          | General                    | Marine                      | Acidity, Dissolved_oxygen, Environment, Temperature_marine                    | NA                                        | Environment,                       | NA                    |
| 843             | NA       | Northwest                   | Northwest_Puget_Sound                              | Model, Projections/physical  | General                    | Marine                      | Acidity, Dissolved_oxygen, Habitat, Temperature_marine                        | NA                                        | Environment,                       | NA                    |
| 844             | 10plus   | Largescale                  | NA                                                 | Field/RemoteSensing          | O. kisutch, O. tshawytscha | Marine                      | Climate_indices                                                               | Mortality                                 | Environment,                       | Demography            |
| 845             | 10plus   | Largescale                  | NA                                                 | Field/RemoteSensing          | O. tshawytscha             | Marine                      | Temperature_marine                                                            | Habitat_Distribution, Mortality           | Environment,                       | Dispersal, Demography |
| 846             | 1        | Europe                      | NA                                                 | Field/RemoteSensing          | S. trutta                  | Population                  | Contaminants, Genetics                                                        | Population_resilience                     | Evolution, Environment,            | Demography            |
| 847             | NA       | Russia                      | NA                                                 | Field/RemoteSensing          | O. kisutch                 | Freshwater_habitat, General | Habitat                                                                       | Habitat_Distribution                      | Environment,                       | Dispersal             |
| 848             | 10plus   | Japan                       | NA                                                 | Field/RemoteSensing, Model   | O. keta                    | Marine                      | Density_Food, Temperature_marine                                              | Growth                                    | Species_interactions, Environment, | Physiology            |
| 849             | NA       | Largescale                  | NA                                                 | Review/MetaAnalysis          | O. keta                    | Marine, Population          | Genetics                                                                      | Genetics_Adaptation, Habitat_Distribution | Evolution,                         | Dispersal, Evolution  |
| 850             | 1        | East_North_America          | NA                                                 | Lab/Experimental             | O. mykiss                  | General, Upmigration        | Temperature_FW                                                                | Performance, Physiology_Condition         | Environment,                       | Physiology            |
| 851             | 1        | Europe                      | NA                                                 | Field/RemoteSensing          | S. salar                   | Outmigration                | Contaminants, Predators                                                       | Behaviour, Mortality                      | Species_interactions, Environment, | Dispersal, Demography |

| Citation number | Duration | Region        | Subregion             | Type of study                              | Species                                                           | Life stage              | Driver                                           | Response                                                       | Driver Process                     | Response Process                  |
|-----------------|----------|---------------|-----------------------|--------------------------------------------|-------------------------------------------------------------------|-------------------------|--------------------------------------------------|----------------------------------------------------------------|------------------------------------|-----------------------------------|
| 852             | 1        | Northwest     | Northwest_Columbia    | Lab/Experimental                           | O. mykiss                                                         | Spawning, Upmigration   | Disease, Temperature_FW                          | Performance                                                    | Species_interactions, Environment, | Physiology                        |
| 853             | NA       | Northwest     | Northwest_Columbia    | Review/MetaAnalysis                        | O. kisutch, O. mykiss, O. nerka, O. tshawytscha, Salmonid_general | Population, Upmigration | Habitat, Management                              | Productivity                                                   | Environment, , Management          | Demography                        |
| 854             | 1        | Northwest     | Northwest_Columbia    | Field/RemoteSensing                        | O. nerka                                                          | Spawning                | Habitat, Management                              | Behaviour, Habitat_Distribution, Mortality                     | Environment, , Management          | Dispersal, Demography             |
| 855             | 2to5     | Northwest     | Northwest_Columbia    | Field/RemoteSensing, Projections/salmon    | O. kisutch                                                        | Juvenile                | Flow, Management                                 | Behaviour                                                      | Environment, , Management          | Dispersal                         |
| 856             | 2to5     | Northwest     | Northwest_Puget_Sound | Field/RemoteSensing                        | O. kisutch                                                        | Population              | NA                                               | Genetics_Adaptation, Growth, Maturation, Morphology, Phenology |                                    | Demography, Evolution, Physiology |
| 857             | 1        | Mountain_west | NA                    | Lab/Experimental                           | O. mykiss                                                         | Juvenile, Upmigration   | Disease, Predators                               | NA                                                             | Species_interactions, NA           |                                   |
| 858             | NA       | NA            | NA                    | Projections/ecosystem, Review/MetaAnalysis | Other_fish                                                        | Marine                  | Acidity, Ecosystem, Prey, Temperature_marine     | NA                                                             | Species_interactions, Environment, | NA                                |
| 859             | 10plus   | Alaska        | Alaska_SE             | Field/RemoteSensing                        | O. keta                                                           | Marine                  | Climate_indices, Environment, Temperature_marine | NA                                                             | Environment,                       | NA                                |
| 860             | 6to10    | California    | Northwest_Columbia    | Field/RemoteSensing                        | General                                                           | Freshwater_habitat      | Environment, Temperature_FW                      | NA                                                             | Environment,                       | NA                                |
| 861             | 2to5     | Mountain_west | NA                    | Field/RemoteSensing                        | O. mykiss                                                         | Juvenile                | Environment, Prey, Temperature_FW                | Growth, Productivity                                           | Species_interactions, Environment, | Demography, Physiology            |



| Citation number | Duration | Region           | Subregion               | Type of study                                    | Species                                                                     | Life stage                 | Driver                                                                      | Response                                       | Driver Process                        | Response Process          |
|-----------------|----------|------------------|-------------------------|--------------------------------------------------|-----------------------------------------------------------------------------|----------------------------|-----------------------------------------------------------------------------|------------------------------------------------|---------------------------------------|---------------------------|
| 862             | NA       | Largescale       | NA                      | Theoretical/<br>Opinion                          | General                                                                     | Marine                     | Fisheries,<br>Management                                                    | NA                                             | , Management                          | NA                        |
| 863             | 10plus   | Alaska           | Alaska_SE               | Field/<br>RemoteSensing                          | O. gorbuscha                                                                | Upmigration                | Genetics                                                                    | Genetics_Adaptation,<br>Phenology              | Evolution,                            | Demography,<br>Evolution  |
| 864             | 10plus   | Alaska           | Alaska_SE               | Field/<br>RemoteSensing                          | O. gorbuscha                                                                | Upmigration                | Genetics                                                                    | Genetics_Adaptation,<br>Phenology              | Evolution,                            | Demography,<br>Evolution  |
| 865             | NA       | Northwest        | Northwest_Columbia      | Field/<br>RemoteSensing                          | S. confluentus                                                              | Evolution                  | Flow, Habitat,<br>Temperature_<br>FW                                        | Genetics_Adaptation,<br>Population_resilience  | Environment,                          | Demography,<br>Evolution  |
| 866             | 10plus   | Northwest        | Northwest_Columbia      | Field/<br>RemoteSensing                          | Salmonid_<br>general                                                        | Juvenile                   | Habitat,<br>Management                                                      | Population_resilience                          | Environment, ,<br>Management          | Demography                |
| 867             | 10plus   | Alaska           | Alaska_SE               | Field/<br>RemoteSensing                          | O. clarkii, O.<br>gorbuscha, O.<br>kisutch, O.<br>nerka, S. malma           | Population,<br>Upmigration | Climate_indice<br>s, Flow,<br>Temperature_<br>FW,<br>Temperature_<br>marine | Phenology                                      | Environment,                          | Demography                |
| 868             | 10plus   | Alaska           | Alaska_SE               | Field/<br>RemoteSensing                          | O. kisutch, O.<br>nerka                                                     | Juvenile                   | Density_Food,<br>Temperature_<br>FW                                         | Growth, Productivity                           | Species_interactions,<br>Environment, | Demography,<br>Physiology |
| 869             | 10plus   | Alaska           | Alaska_SE               | Field/<br>RemoteSensing                          | O. gorbuscha, O.<br>keta, O. kisutch,<br>O. nerka, O.<br>tshawytscha        | Upmigration                | Climate_indice<br>s, Flow,<br>Temperature_<br>marine                        | Phenology                                      | Environment,                          | Demography                |
| 870             | NA       | NA               | NA                      | Review/<br>MetaAnalysis                          | O. clarkii, O.<br>mykiss, S.<br>confluentus, S.<br>fontinalis, S.<br>trutta | General,<br>Population     | Temperature_<br>FW                                                          | Physiology_Condition,<br>Population_resilience | Environment,                          | Demography,<br>Physiology |
| 871             | NA       | Mountain_west    | NA                      | Model                                            | O. clarkii                                                                  | Freshwater_habitat         | Habitat,<br>Management,<br>Restoration                                      | Habitat_Distribution                           | Environment, ,<br>Management          | Dispersal                 |
| 872             | 1        | British_Columbia | British_Columbia_Fraser | Lab/<br>Experimental                             | O. kisutch                                                                  | Upmigration                | Temperature_<br>FW                                                          | Performance,<br>Physiology_Condition           | Environment,                          | Physiology                |
| 873             | 2to5     | Mountain_west    | NA                      | Field/<br>RemoteSensing,<br>Lab/<br>Experimental | S. fontinalis                                                               | Juvenile                   | Flow                                                                        | Behaviour,<br>Physiology_Condition             | Environment,                          | Dispersal,<br>Physiology  |

| Citation number | Duration | Region             | Subregion                             | Type of study                  | Species                      | Life stage                    | Driver                                                            | Response                                           | Driver Process                                | Response Process                  |
|-----------------|----------|--------------------|---------------------------------------|--------------------------------|------------------------------|-------------------------------|-------------------------------------------------------------------|----------------------------------------------------|-----------------------------------------------|-----------------------------------|
| 874             | NA       | British_Columbia   | British_Columbia_not_Fraser           | Review/<br>MetaAnalysis        | Salmonid_general             | Juvenile, Marine, Upmigration | Contaminants, Density_Food, Management, Predators, Temperature_FW | Mortality                                          | Species_interactions, Environment, Management | Demography                        |
| 875             | NA       | NA                 | NA                                    | Review/<br>MetaAnalysis        | General                      | Marine                        | Acidity, Ecosystem, Temperature_marine                            | Physiology_Condition                               | Species_interactions, Environment,            | Physiology                        |
| 876             | NA       | NA                 | NA                                    | Review/<br>MetaAnalysis        | General                      | Marine                        | Acidity                                                           | Physiology_Condition                               | Environment,                                  | Physiology                        |
| 877             | 10plus   | Northwest          | Northwest_Coastal, Northwest_Columbia | Field/<br>RemoteSensing        | General                      | Freshwater_habitat            | Habitat, Temperature_FW                                           | Habitat_Distribution                               | Environment,                                  | Dispersal                         |
| 878             | NA       | Northwest          | Northwest_Columbia                    | Field/<br>RemoteSensing, Model | Salmonid_general             | Juvenile, Outmigration        | Habitat, Restoration                                              | Population_resilience                              | Environment, Management                       | Demography                        |
| 879             | 10plus   | Europe             | NA                                    | Field/<br>RemoteSensing        | Other_fish, Salmonid_general | Population                    | Temperature_FW                                                    | Mortality, Phenology                               | Environment,                                  | Demography                        |
| 880             | 1        | Northwest          | Northwest_Columbia                    | Lab/<br>Experimental           | O. tshawytscha               | Juvenile                      | Predators, Temperature_FW                                         | Behaviour, Growth, Mortality, Physiology_Condition | Species_interactions, Environment,            | Dispersal, Demography, Physiology |
| 881             | NA       | Japan              | NA                                    | Lab/<br>Experimental           | Other_species                | Marine                        | Acidity                                                           | NA                                                 | Environment,                                  | NA                                |
| 882             | 1        | Japan              | NA                                    | Lab/<br>Experimental           | Other_species                | Marine                        | Acidity                                                           | Mortality, Productivity                            | Environment,                                  | Demography                        |
| 883             | 1        | Japan              | NA                                    | Lab/<br>Experimental           | Other_species                | Marine                        | Acidity                                                           | Physiology_Condition                               | Environment,                                  | Physiology                        |
| 884             | 1        | Japan              | NA                                    | Review/<br>MetaAnalysis        | Other_species                | Marine                        | Acidity                                                           | Physiology_Condition                               | Environment,                                  | Physiology                        |
| 885             | NA       | East_North_America | NA                                    | Theoretical/<br>Opinion        | General, S. salar            | Freshwater_habitat            | Habitat, Management, Restoration                                  | NA                                                 | Environment, Management                       | NA                                |
| 886             | 6to10    | Russia             | NA                                    | Field/<br>RemoteSensing        | O. mykiss                    | Upmigration                   | Temperature_marine                                                | Life_history, Phenology                            | Environment,                                  | Demography                        |

| Citation number | Duration | Region             | Subregion                                    | Type of study                                    | Species               | Life stage                                           | Driver                                               | Response                             | Driver Process                        | Response Process          |
|-----------------|----------|--------------------|----------------------------------------------|--------------------------------------------------|-----------------------|------------------------------------------------------|------------------------------------------------------|--------------------------------------|---------------------------------------|---------------------------|
| 887             | 10plus   | Russia             | NA                                           | Field/<br>RemoteSensing                          | O. mykiss             | Population                                           | Genetics                                             | Genetics_Adaptation,<br>Life_history | Evolution,                            | Demography,<br>Evolution  |
| 888             | 10plus   | Europe             | NA                                           | Field/<br>RemoteSensing                          | S. trutta             | Juvenile,<br>Population                              | Habitat,<br>Invasives                                | Habitat_Distribution                 | Species_interactions,<br>Environment, | Dispersal                 |
| 889             | 1        | Europe             | NA                                           | Lab/<br>Experimental                             | Other_species         | Marine                                               | Acidity,<br>Contaminants                             | NA                                   | Environment,                          | NA                        |
| 890             | 2to5     | East_North_America | NA                                           | Field/<br>RemoteSensing                          | S. salar              | Juvenile,<br>Marine,<br>Outmigration                 | Habitat,<br>Temperature_marine                       | Behaviour,<br>Habitat_Distribution   | Environment,                          | Dispersal                 |
| 891             | 2to5     | East_North_America | NA                                           | Field/<br>RemoteSensing                          | S. salar              | Marine                                               | Habitat,<br>Temperature_marine                       | Behaviour,<br>Habitat_Distribution   | Environment,                          | Dispersal                 |
| 892             | 1        | Northwest          | Northwest_Columbia                           | Lab/<br>Experimental                             | O. kisutch            | Juvenile                                             | Contaminants,<br>Dissolved_oxygen,<br>Temperature_FW | Physiology_Condition                 | Environment,                          | Physiology                |
| 893             | 6to10    | Europe             | NA                                           | Field/<br>RemoteSensing,<br>Lab/<br>Experimental | Other_fish            | Egg                                                  | Temperature_FW                                       | Phenology,<br>Physiology_Condition   | Environment,                          | Demography,<br>Physiology |
| 894             | 1        | Europe             | NA                                           | Lab/<br>Experimental                             | Other_fish, S. trutta | Egg                                                  | Temperature_FW                                       | Performance,<br>Physiology_Condition | Environment,                          | Physiology                |
| 895             | NA       | NA                 | NA                                           | Model                                            | General               | General                                              | Ecosystem,<br>Methods                                | NA                                   | Species_interactions,                 | NA                        |
| 896             | NA       | Europe             | NA                                           | Theoretical/<br>Opinion                          | S. salar              | General                                              | Fisheries,<br>Management                             | Livelihood                           | , Management                          | Management                |
| 897             | 2to5     | Northwest          | Northwest_Columbia,<br>Northwest_Puget_Sound | Field/<br>RemoteSensing,<br>Model                | O. tshawytscha        | Egg,<br>Freshwater_habitat, Juvenile,<br>Upmigration | Contaminants,<br>Dissolved_oxygen,<br>Temperature_FW | Population_resilience                | Environment,                          | Demography                |
| 898             | NA       | California         | California_CV                                | Model                                            | General               | Freshwater_habitat                                   | Environment,<br>Flow, Habitat,<br>Methods            | NA                                   | Environment,                          | NA                        |
| 899             | 10plus   | Northwest          | Northwest_Columbia                           | Field/<br>RemoteSensing                          | O. tshawytscha        | Egg, Spawning                                        | Flow,<br>Management                                  | Productivity                         | Environment, ,<br>Management          | Demography                |
| 900             | 1        | Northwest          | Northwest_Columbia                           | Field/<br>RemoteSensing                          | O. tshawytscha        | General                                              | Genetics,<br>Methods                                 | Habitat_Distribution                 | Evolution*,                           | Dispersal                 |

| Citation number | Duration | Region                 | Subregion              | Type of study                                                | Species             | Life stage                | Driver                                                                        | Response                                       | Driver Process                        | Response Process          |
|-----------------|----------|------------------------|------------------------|--------------------------------------------------------------|---------------------|---------------------------|-------------------------------------------------------------------------------|------------------------------------------------|---------------------------------------|---------------------------|
| 901             | 6to10    | Europe                 | NA                     | Field/<br>RemoteSensing                                      | S. trutta           | Population                | Density_Food,<br>Habitat,<br>Temperature_<br>FW                               | Productivity                                   | Species_interactions,<br>Environment, | Demography                |
| 902             | NA       | Europe                 | NA                     | Field/<br>RemoteSensing                                      | S. trutta           | General                   | Flow,<br>Management                                                           | Habitat_Distribution                           | Environment, ,<br>Management          | Dispersal                 |
| 903             | 2to5     | East_North_A<br>merica | NA                     | Field/<br>RemoteSensing                                      | S. salar            | Outmigration              | Habitat                                                                       | Habitat_Distribution,<br>Mortality             | Environment,                          | Dispersal,<br>Demography  |
| 904             | 2to5     | California             | California_CV          | Field/<br>RemoteSensing,<br>Model                            | O. tshawytscha      | Juvenile                  | Habitat,<br>Methods,<br>Restoration                                           | Mortality                                      | Environment, ,<br>Management          | Demography                |
| 905             | 6to10    | California             | California_N           | Field/<br>RemoteSensing                                      | O. kisutch          | Juvenile                  | Flow, Habitat,<br>Temperature_<br>FW                                          | Habitat_Distribution,<br>Population_resilience | Environment,                          | Dispersal,<br>Demography  |
| 906             | 10plus   | Alaska                 | Alaska_W               | Field/<br>RemoteSensing                                      | O. nerka            | Evolution,<br>Upmigration | Disease,<br>Genetics                                                          | Genetics_Adaptation                            | Species_interactions,<br>Evolution,   | Evolution                 |
| 907             | 1        | Europe                 | NA                     | Field/<br>RemoteSensing                                      | S. salar, S. trutta | Juvenile                  | Disease, Flow,<br>Temperature_<br>FW                                          | Immune, Mortality                              | Species_interactions,<br>Environment, | Demography,<br>Physiology |
| 908             | 2to5     | East_North_A<br>merica | NA                     | Field/<br>RemoteSensing                                      | S. salar            | Egg                       | Dissolved_oxyg<br>en,<br>Environment,<br>Flow, Habitat,<br>Temperature_<br>FW | Mortality                                      | Environment,                          | Demography                |
| 909             | 2to5     | Northwest              | Northwest_Col<br>umbia | Field/<br>RemoteSensing,<br>Model,<br>Projections/<br>salmon | O. tshawytscha      | Juvenile                  | Management,<br>Restoration,<br>Temperature_<br>FW                             | Habitat_Distribution,<br>Population_resilience | Environment, ,<br>Management          | Dispersal,<br>Demography  |
| 910             | 2to5     | Northwest              | Northwest_Col<br>umbia | Field/<br>RemoteSensing,<br>Model                            | O. tshawytscha      | Juvenile                  | Invasives,<br>Predators,<br>Temperature_<br>FW                                | Habitat_Distribution,<br>Physiology_Condition  | Species_interactions,<br>Environment, | Dispersal,<br>Physiology  |
| 911             | 2to5     | Northwest              | Northwest_Col<br>umbia | Field/<br>RemoteSensing                                      | O. tshawytscha      | Juvenile                  | Invasives,<br>Predators,<br>Temperature_<br>FW                                | Habitat_Distribution                           | Species_interactions,<br>Environment, | Dispersal                 |

| Citation number | Duration | Region             | Subregion                                   | Type of study                                        | Species       | Life stage                | Driver                                          | Response                                                       | Driver Process                        | Response Process          |
|-----------------|----------|--------------------|---------------------------------------------|------------------------------------------------------|---------------|---------------------------|-------------------------------------------------|----------------------------------------------------------------|---------------------------------------|---------------------------|
| 912             | 10plus   | East_North_America | NA                                          | Field/<br>RemoteSensing                              | Other_fish    | Evolution,<br>Population  | Genetics                                        | Genetics_Adaptation,<br>Population_resilience,<br>Productivity | Evolution,                            | Demography,<br>Evolution  |
| 913             | 10plus   | British_Columbia   | British_Columbia_Fraser                     | Model                                                | General       | Freshwater_habitat        | Temperature_<br>FW                              | NA                                                             | Environment,                          | NA                        |
| 914             | 6to10    | British_Columbia   | British_Columbia_not_Fraser                 | Field/<br>RemoteSensing                              | O. clarkii    | Juvenile                  | Habitat,<br>Management,<br>Temperature_<br>FW   | Growth,<br>Physiology_Condition                                | Environment, ,<br>Management          | Physiology                |
| 915             | 1        | Europe             | NA                                          | Lab/<br>Experimental                                 | Other_fish    | Egg, Juvenile             | Temperature_<br>FW                              | Behaviour, Growth,<br>Morphology                               | Environment,                          | Dispersal,<br>Physiology  |
| 916             | 1        | East_North_America | NA                                          | Lab/<br>Experimental                                 | O. mykiss     | Evolution                 | Temperature_<br>FW                              | Physiology_Condition                                           | Environment,                          | Physiology                |
| 917             | NA       | Europe             | NA                                          | Model                                                | S. trutta     | Juvenile                  | Density_Food,<br>Habitat,<br>Temperature_<br>FW | Growth, Productivity                                           | Species_interactions,<br>Environment, | Demography,<br>Physiology |
| 918             | NA       | NA                 | NA                                          | Review/<br>MetaAnalysis                              | General       | Marine                    | Acidity                                         | Physiology_Condition                                           | Environment,                          | Physiology                |
| 919             | 1        | Asia_other         | NA                                          | Lab/<br>Experimental                                 | O. keta       | Outmigration              | Environment,<br>Genetics,<br>Temperature_<br>FW | Physiology_Condition                                           | Evolution,<br>Environment,            | Physiology                |
| 920             | 10plus   | Northwest          | Northwest_Coastal,<br>Northwest_Puget_Sound | Field/<br>RemoteSensing,<br>Projections/<br>physical | General       | Freshwater_habitat        | Habitat,<br>Temperature_<br>FW                  | NA                                                             | Environment,                          | NA                        |
| 921             | 1        | Europe             | NA                                          | Lab/<br>Experimental                                 | Other_fish    | Juvenile                  | Temperature_<br>FW                              | Growth, Maturation                                             | Environment,                          | Physiology                |
| 922             | 2to5     | East_North_America | NA                                          | Field/<br>RemoteSensing                              | S. salar      | Juvenile,<br>Outmigration | Temperature_<br>FW                              | Behaviour, Phenology                                           | Environment,                          | Dispersal,<br>Demography  |
| 923             | NA       | NA                 | NA                                          | Review/<br>MetaAnalysis                              | General       | General                   | Dissolved_oxygen,<br>Temperature_<br>FW         | Performance,<br>Physiology_Condition                           | Environment,                          | Physiology                |
| 924             | 2to5     | East_North_America | NA                                          | Field/<br>RemoteSensing                              | S. fontinalis | Population                | Habitat,<br>Management                          | Genetics_Adaptation                                            | Environment, ,<br>Management          | Evolution                 |

| Citation number | Duration | Region                     | Subregion                             | Type of study                                  | Species                    | Life stage                                | Driver                             | Response                                              | Driver Process                     | Response Process      |
|-----------------|----------|----------------------------|---------------------------------------|------------------------------------------------|----------------------------|-------------------------------------------|------------------------------------|-------------------------------------------------------|------------------------------------|-----------------------|
| 925             | NA       | East_North_America, Europe | NA                                    | Field/RemoteSensing, Review/MetaAnalysis       | S. salar                   | Marine, Population                        | Genetics                           | Genetics_Adaptation                                   | Evolution,                         | Evolution             |
| 926             | NA       | East_North_America, Europe | NA                                    | Field/RemoteSensing                            | S. salar                   | Evolution, Population                     | Genetics                           | Population_resilience                                 | Evolution,                         | Demography            |
| 927             | 10plus   | Northwest                  | Northwest_Coastal, Northwest_Columbia | Model, Projections/physical                    | General                    | Freshwater_habitat                        | Flow, Habitat                      | NA                                                    | Environment,                       | NA                    |
| 928             | 10plus   | Europe                     | NA                                    | Field/RemoteSensing                            | S. trutta                  | Juvenile, Marine                          | Temperature_FW, Temperature_marine | Growth                                                | Environment,                       | Physiology            |
| 929             | 2to5     | Northwest                  | Northwest_Columbia                    | Field/RemoteSensing                            | O. clarkii, S. confluentus | Freshwater_habitat, Population            | Habitat, Temperature_FW            | Habitat_Distribution, Population_resilience           | Environment,                       | Dispersal, Demography |
| 930             | NA       | East_North_America, Europe | NA                                    | Review/MetaAnalysis                            | S. salar                   | Freshwater_habitat                        | Habitat, Management, Restoration   | Population_resilience                                 | Environment, , Management          | Demography            |
| 931             | 1        | Europe                     | NA                                    | Field/RemoteSensing                            | S. salar                   | Upmigration                               | Temperature_FW                     | Behaviour, Performance, Physiology_Condition          | Environment,                       | Dispersal, Physiology |
| 932             | 2to5     | Europe                     | NA                                    | Field/RemoteSensing                            | S. trutta                  | Marine, Outmigration                      | Disease, Habitat                   | Behaviour, Habitat_Distribution, Physiology_Condition | Species_interactions, Environment, | Dispersal, Physiology |
| 933             | NA       | NA                         | NA                                    | Review/MetaAnalysis                            | Salmonid_general           | Freshwater_habitat, Juvenile, Upmigration | Habitat                            | Habitat_Distribution, Life_history                    | Environment,                       | Dispersal, Demography |
| 934             | NA       | Alaska                     | Alaska_S                              | Field/RemoteSensing, Model, Projections/salmon | O. kisutch                 | Population                                | Flow, Habitat, Temperature_FW      | Productivity                                          | Environment,                       | Demography            |
| 935             | 2to5     | Alaska                     | Alaska_SE                             | Field/RemoteSensing                            | O. kisutch, O. nerka       | Spawning                                  | Flow, Management, Methods          | NA                                                    | Environment, , Management          | NA                    |

| Citation number | Duration | Region                                  | Subregion                   | Type of study                            | Species                   | Life stage                         | Driver                                        | Response                                             | Driver Process                                  | Response Process                 |
|-----------------|----------|-----------------------------------------|-----------------------------|------------------------------------------|---------------------------|------------------------------------|-----------------------------------------------|------------------------------------------------------|-------------------------------------------------|----------------------------------|
| 936             | 1        | East_North_America                      | NA                          | Lab/Experimental                         | O. mykiss                 | Juvenile                           | Temperature_FW                                | Physiology_Condition                                 | Environment,                                    | Physiology                       |
| 937             | NA       | Japan                                   | NA                          | Model                                    | Other_species             | Marine                             | Environment, Genetics, Temperature_marine     | Habitat_Distribution                                 | Evolution, Environment,                         | Dispersal                        |
| 938             | 1        | British_Columbia                        | British_Columbia_Fraser     | Field/RemoteSensing                      | O. nerka                  | Upmigration                        | Flow, Management                              | Behaviour, Mortality                                 | Environment, , Management                       | Dispersal, Demography            |
| 939             | NA       | Largescale                              | NA                          | Projections/physical                     | General                   | Marine                             | Climate_indices, Temperature_marine           | NA                                                   | Environment,                                    | NA                               |
| 940             | NA       | NA                                      | NA                          | Review/MetaAnalysis, Theoretical/Opinion | General                   | General, Outmigration, Upmigration | Genetics, Management                          | Genetics_Adaptation, Habitat_Distribution, Phenology | Evolution, , Management                         | Dispersal, Demography, Evolution |
| 941             | 10plus   | California                              | California_S                | Field/RemoteSensing                      | Other_species             | Marine                             | Climate_indices, Density_Food                 | Habitat_Distribution                                 | Species_interactions, Environment,              | Dispersal                        |
| 942             | 2to5     | East_North_America                      | NA                          | Lab/Experimental                         | O. tshawytscha            | Egg                                | Temperature_FW                                | Carryover, Performance, Physiology_Condition         | Environment,                                    | Demography, Physiology           |
| 943             | NA       | British_Columbia, Largescale, Northwest | NA                          | Field/RemoteSensing                      | O. mykiss                 | Evolution                          | Habitat, Temperature_FW                       | Genetics_Adaptation, Immune                          | Environment,                                    | Evolution, Physiology            |
| 944             | 1        | British_Columbia                        | British_Columbia_Fraser     | Lab/Experimental                         | O. nerka                  | Juvenile, Outmigration             | Contaminants, Environment                     | Mortality, Physiology_Condition                      | Environment,                                    | Demography, Physiology           |
| 945             | 1        | British_Columbia                        | British_Columbia_not_Fraser | Lab/Experimental                         | O. gorbuscha              | Outmigration                       | Contaminants, Environment, Temperature_marine | Mortality, Physiology_Condition                      | Environment,                                    | Demography, Physiology           |
| 946             | NA       | Alaska                                  | Alaska_W                    | Model                                    | O. nerka                  | Upmigration                        | Fisheries, Habitat, Predators                 | Genetics_Adaptation, Morphology                      | Species_interactions, Environment, , Management | Evolution, Physiology            |
| 947             | NA       | California                              | California_CV               | Model                                    | O. mykiss, O. tshawytscha | Population                         | Management, Methods                           | Population_resilience                                | , Management                                    | Demography                       |

| Citation number | Duration | Region             | Subregion                                | Type of study                                    | Species                      | Life stage  | Driver                                                                | Response                                           | Driver Process                        | Response Process          |
|-----------------|----------|--------------------|------------------------------------------|--------------------------------------------------|------------------------------|-------------|-----------------------------------------------------------------------|----------------------------------------------------|---------------------------------------|---------------------------|
| 948             | 2to5     | East_North_America | NA                                       | Field/<br>RemoteSensing                          | S. salar                     | Juvenile    | Environment,<br>Flow,<br>Temperature_<br>FW                           | Mortality                                          | Environment,                          | Demography                |
| 949             | 1        | Europe             | NA                                       | Field/<br>RemoteSensing,<br>Lab/<br>Experimental | Other_species                | Marine      | Acidity                                                               | Mortality, Performance                             | Environment,                          | Demography,<br>Physiology |
| 950             | 1        | NA                 | NA                                       | Lab/<br>Experimental                             | Salmonid_<br>general         | General     | Management,<br>Methods,<br>Temperature_<br>FW                         | Growth                                             | Environment, ,<br>Management          | Physiology                |
| 951             | 1        | British_Columbia   | British_Columbia_Fraser                  | Lab/<br>Experimental                             | O. kisutch                   | Upmigration | Temperature_<br>FW                                                    | Mortality,<br>Performance,<br>Physiology_Condition | Environment,                          | Demography,<br>Physiology |
| 952             | NA       | NA                 | NA                                       | Review/<br>MetaAnalysis                          | General                      | General     | Temperature_<br>FW,<br>Temperature_<br>marine                         | Physiology_Condition                               | Environment,                          | Physiology                |
| 953             | 2to5     | Northwest          | Northwest_Coastal,<br>Northwest_Columbia | Field/<br>RemoteSensing,<br>Model                | O. tshawytscha               | Marine      | Density_Food,<br>Prey,<br>Temperature_<br>marine                      | Growth,<br>Physiology_Condition                    | Species_interactions,<br>Environment, | Physiology                |
| 954             | 10plus   | Northwest          | Northwest_Coastal,<br>Northwest_Columbia | Field/<br>RemoteSensing                          | O. gorbuscha, O. keta        | Marine      | Climate_indices,<br>Density_Food                                      | Productivity                                       | Species_interactions,<br>Environment, | Demography                |
| 955             | 2to5     | Northwest          | Northwest_Coastal                        | Field/<br>RemoteSensing                          | Other_fish                   | Juvenile    | Ecosystem,<br>Environment,<br>Prey,<br>Temperature_<br>marine         | Physiology_Condition                               | Species_interactions,<br>Environment, | Physiology                |
| 956             | 10plus   | Northwest          | Northwest_Coastal,<br>Northwest_Columbia | Field/<br>RemoteSensing                          | Other_fish,<br>Other_species | Marine      | Density_Food,<br>Ecosystem,<br>Environment,<br>Temperature_<br>marine | Habitat_Distribution                               | Species_interactions,<br>Environment, | Dispersal                 |



| Citation number | Duration | Region                                                                   | Subregion                                                  | Type of study           | Species                                                     | Life stage                           | Driver                                                                    | Response                                      | Driver Process                                        | Response Process                        |
|-----------------|----------|--------------------------------------------------------------------------|------------------------------------------------------------|-------------------------|-------------------------------------------------------------|--------------------------------------|---------------------------------------------------------------------------|-----------------------------------------------|-------------------------------------------------------|-----------------------------------------|
| 957             | 10plus   | Largescale                                                               | NA                                                         | Field/<br>RemoteSensing | Other_fish,<br>Salmonid_<br>general                         | Marine                               | Environment,<br>Fisheries, Prey,<br>Temperature_<br>marine                | NA                                            | Species_interactions,<br>Environment, ,<br>Management | NA                                      |
| 958             | 10plus   | Largescale                                                               | NA                                                         | Field/<br>RemoteSensing | O. gorbuscha, O.<br>keta, O. nerka                          | Marine                               | Temperature_<br>marine                                                    | Population_resilience,<br>Productivity        | Environment,                                          | Demography                              |
| 959             | 10plus   | Alaska                                                                   | Alaska_S,<br>Alaska_SE                                     | Field/<br>RemoteSensing | O. gorbuscha, O.<br>keta, O. nerka,<br>Salmonid_<br>general | Marine                               | Climate_indice<br>s, Fisheries,<br>Temperature_<br>marine                 | Productivity                                  | Environment, ,<br>Management                          | Demography                              |
| 960             | 10plus   | Alaska                                                                   | Alaska_S,<br>Alaska_SE                                     | Field/<br>RemoteSensing | General                                                     | Marine                               | Climate_indice<br>s, Ecosystem,<br>Temperature_<br>marine                 | NA                                            | Species_interactions,<br>Environment,                 | NA                                      |
| 961             | 10plus   | Alaska,<br>British_Colum<br>bia, California,<br>Largescale,<br>Northwest | NA                                                         | Field/<br>RemoteSensing | General                                                     | Marine                               | Climate_indice<br>s, Ecosystem,<br>Environment,<br>Temperature_<br>marine | NA                                            | Species_interactions,<br>Environment,                 | NA                                      |
| 962             | 10plus   | Alaska,<br>British_Colum<br>bia                                          | Alaska_S,<br>Alaska_SE,<br>British_Columb<br>ia_not_Fraser | Field/<br>RemoteSensing | O. gorbuscha, O.<br>kisutch, O.<br>nerka                    | Marine                               | Climate_indice<br>s,<br>Environment,<br>Temperature_<br>marine            | Productivity                                  | Environment,                                          | Demography                              |
| 963             | 1        | Asia_other                                                               | NA                                                         | Lab/<br>Experimental    | O. mykiss                                                   | Juvenile                             | Temperature_<br>FW                                                        | Physiology_Condition                          | Environment,                                          | Physiology                              |
| 964             | NA       | NA                                                                       | NA                                                         | Review/<br>MetaAnalysis | General                                                     | Marine                               | Acidity,<br>Ecosystem,<br>Temperature_<br>marine                          | Growth,<br>Habitat_Distribution,<br>Mortality | Species_interactions,<br>Environment,                 | Dispersal,<br>Demography,<br>Physiology |
| 965             | 6to10    | Alaska                                                                   | Alaska_W                                                   | Field/<br>RemoteSensing | O. tshawytscha                                              | Marine                               | NA                                                                        | Habitat_Distribution                          |                                                       | Dispersal                               |
| 966             | NA       | NA                                                                       | NA                                                         | Review/<br>MetaAnalysis | General                                                     | General,<br>Juvenile,<br>Upmigration | Disease                                                                   | NA                                            | Species_interactions,                                 | NA                                      |

| Citation number | Duration | Region             | Subregion               | Type of study       | Species             | Life stage            | Driver                                         | Response                     | Driver Process                     | Response Process      |
|-----------------|----------|--------------------|-------------------------|---------------------|---------------------|-----------------------|------------------------------------------------|------------------------------|------------------------------------|-----------------------|
| 967             | 1        | British_Columbia   | British_Columbia_Fraser | Lab/Experimental    | O. kisutch          | Egg                   | Genetics, Temperature_FW                       | Growth, Physiology_Condition | Evolution, Environment,            | Physiology            |
| 968             | 1        | British_Columbia   | British_Columbia_Fraser | Lab/Experimental    | O. kisutch          | Egg, Juvenile         | Genetics, Temperature_FW                       | Growth, Physiology_Condition | Evolution, Environment,            | Physiology            |
| 969             | 10plus   | East_North_America | NA                      | Model               | General             | Juvenile              | Flow                                           | NA                           | Environment,                       | NA                    |
| 970             | 1        | East_North_America | NA                      | Lab/Experimental    | General, Other_fish | Marine                | Acidity, Predators                             | NA                           | Species_interactions, Environment, | NA                    |
| 971             | 10plus   | Northwest          | Northwest_Coastal       | Field/RemoteSensing | O. kisutch          | Spawning, Upmigration | Flow, Temperature_FW                           | Behaviour, Phenology         | Environment,                       | Dispersal, Demography |
| 972             | NA       | California         | California_N            | Review/MetaAnalysis | General             | Freshwater_habitat    | Flow, Habitat, Temperature_FW                  | NA                           | Environment,                       | NA                    |
| 973             | 1        | California         | California_N            | Lab/Experimental    | O. kisutch          | Juvenile              | Density_Food, Prey, Temperature_FW             | Growth                       | Species_interactions, Environment, | Physiology            |
| 974             | 1        | East_North_America | NA                      | Lab/Experimental    | S. salar            | Upmigration           | Disease, Temperature_FW                        | NA                           | Species_interactions, Environment, | NA                    |
| 975             | 10plus   | East_North_America | NA                      | Field/RemoteSensing | Other_fish          | Spawning              | Temperature_FW                                 | Phenology                    | Environment,                       | Demography            |
| 976             | 10plus   | Russia             | NA                      | Field/RemoteSensing | O. gorbuscha        | Marine                | Temperature_FW, Temperature_marine             | Phenology, Productivity      | Environment,                       | Demography            |
| 977             | 10plus   | Asia_other, Japan  | NA                      | Field/RemoteSensing | General             | Marine                | Climate_indices, Ecosystem, Temperature_marine | NA                           | Species_interactions, Environment, | NA                    |
| 978             | 10plus   | British_Columbia   | British_Columbia_Fraser | Field/RemoteSensing | O. nerka            | Upmigration           | Flow, Management, Temperature_FW               | Mortality                    | Environment, , Management          | Demography            |

| Citation number | Duration | Region                              | Subregion                                                           | Type of study                           | Species                                         | Life stage              | Driver                                   | Response                                           | Driver Process                     | Response Process      |
|-----------------|----------|-------------------------------------|---------------------------------------------------------------------|-----------------------------------------|-------------------------------------------------|-------------------------|------------------------------------------|----------------------------------------------------|------------------------------------|-----------------------|
| 979             | 10plus   | British_Columbia                    | British_Columbia_Fraser                                             | Field/RemoteSensing                     | O. nerka                                        | Upmigration             | Flow, Management, Temperature_FW         | Mortality                                          | Environment, , Management          | Demography            |
| 980             | 2to5     | Mountain_west                       | NA                                                                  | Field/RemoteSensing, Projections/salmon | O. clarkii, Other_fish                          | Egg, Freshwater_habitat | Flow, Temperature_FW                     | Habitat_Distribution, Phenology                    | Environment,                       | Dispersal, Demography |
| 981             | 10plus   | California                          | California_CV                                                       | Field/RemoteSensing                     | O. tshawytscha                                  | Marine, Outmigration    | Habitat, Prey, Temperature_marine        | Growth, Habitat_Distribution, Physiology_Condition | Species_interactions, Environment, | Dispersal, Physiology |
| 982             | 10plus   | Alaska, British_Columbia, Northwest | Alaska_S, Alaska_SE, British_Columbia_not_Fraser, Northwest_Coastal | Field/RemoteSensing                     | O. kisutch, Other_species                       | Marine                  | Prey, Temperature_marine                 | Habitat_Distribution                               | Species_interactions, Environment, | Dispersal             |
| 983             | 1        | Australia_New Zealand               | NA                                                                  | Lab/Experimental                        | O. kisutch                                      | Marine                  | Disease, Environment, Temperature_marine | Mortality                                          | Species_interactions, Environment, | Demography            |
| 984             | 1        | East_North_America                  | NA                                                                  | Lab/Experimental                        | S. fontinalis                                   | Juvenile                | Temperature_FW                           | Performance, Physiology_Condition                  | Environment,                       | Physiology            |
| 985             | 1        | East_North_America                  | NA                                                                  | Field/RemoteSensing                     | S. salar                                        | Outmigration            | Disease                                  | Performance, Physiology_Condition                  | Species_interactions,              | Physiology            |
| 986             | 1        | Mountain_west                       | NA                                                                  | Field/RemoteSensing, Lab/Experimental   | O. mykiss                                       | General, Juvenile       | Density_Food, Invasives                  | NA                                                 | Species_interactions,              | NA                    |
| 987             | NA       | East_North_America                  | NA                                                                  | Model, Review/MetaAnalysis              | S. salar                                        | Juvenile                | Density_Food, Habitat, Temperature_FW    | Growth, Physiology_Condition                       | Species_interactions, Environment, | Physiology            |
| 988             | 1        | Mountain_west                       | NA                                                                  | Lab/Experimental                        | O. clarkii, O. mykiss, S. fontinalis, S. trutta | Juvenile                | Temperature_FW                           | Performance, Physiology_Condition                  | Environment,                       | Physiology            |

| Citation number | Duration | Region                   | Subregion                                               | Type of study                       | Species                                                    | Life stage                   | Driver                                             | Response                                                               | Driver Process                                        | Response Process                       |
|-----------------|----------|--------------------------|---------------------------------------------------------|-------------------------------------|------------------------------------------------------------|------------------------------|----------------------------------------------------|------------------------------------------------------------------------|-------------------------------------------------------|----------------------------------------|
| 989             | NA       | Largescale               | NA                                                      | Review/<br>MetaAnalysis             | General                                                    | Marine                       | Ecosystem,<br>Fisheries,<br>Temperature_<br>marine | Habitat_Distribution                                                   | Species_interactions,<br>Environment, ,<br>Management | Dispersal                              |
| 990             | 10plus   | Largescale               | NA                                                      | Field/<br>RemoteSensing             | Salmonid_<br>general                                       | Evolution                    | Genetics                                           | Life_history                                                           | Evolution,                                            | Demography                             |
| 991             | 1        | East_North_A<br>merica   | NA                                                      | Lab/<br>Experimental                | S. salar                                                   | Juvenile,<br>Outmigration    | Dissolved_oxyg<br>en,<br>Temperature_<br>FW        | Performance,<br>Physiology_Condition                                   | Environment,                                          | Physiology                             |
| 992             | 10plus   | East_North_A<br>merica   | NA                                                      | Field/<br>RemoteSensing             | Other_fish                                                 | Population                   | Genetics,<br>Temperature_<br>marine                | Genetics_Adaptation,<br>Habitat_Distribution,<br>Population_resilience | Evolution,<br>Environment,                            | Dispersal,<br>Demography,<br>Evolution |
| 993             | NA       | California,<br>Northwest | California_N,<br>California_S,<br>Northwest_Co<br>astal | Model,<br>Projections/<br>ecosystem | Other_species                                              | Marine                       | Ecosystem,<br>Environment                          | Habitat_Distribution,<br>Productivity                                  | Species_interactions,<br>Environment,                 | Dispersal,<br>Demography               |
| 994             | 1        | Europe                   | NA                                                      | Lab/<br>Experimental                | O. mykiss                                                  | Evolution                    | Genetics,<br>Temperature_<br>FW                    | Life_history                                                           | Evolution,<br>Environment,                            | Demography                             |
| 995             | 10plus   | California               | California_CV                                           | Field/<br>RemoteSensing             | O. tshawytscha,<br>Other_fish                              | Juvenile,<br>Population      | Flow                                               | Productivity                                                           | Environment,                                          | Demography                             |
| 996             | 2to5     | British_Colum<br>bia     | British_Columb<br>ia_Fraser                             | Field/<br>RemoteSensing             | O. nerka                                                   | Outmigration,<br>Upmigration | Disease                                            | NA                                                                     | Species_interactions,                                 | NA                                     |
| 997             | NA       | East_North_A<br>merica   | NA                                                      | Theoretical/<br>Opinion             | S. salar                                                   | Freshwater_ha<br>bitat       | Flow,<br>Management                                | Population_resilience                                                  | Environment, ,<br>Management                          | Demography                             |
| 998             | 1        | Mountain_we<br>st        | NA                                                      | Field/<br>RemoteSensing,<br>Model   | General,<br>Other_species                                  | Juvenile                     | Habitat,<br>Temperature_<br>FW                     | NA                                                                     | Environment,                                          | NA                                     |
| 999             | 1        | Europe                   | NA                                                      | Lab/<br>Experimental                | O. mykiss,<br>Other_fish, S.<br>salar                      | Juvenile                     | Environment,<br>Methods,<br>Temperature_<br>FW     | Behaviour                                                              | Environment,                                          | Dispersal                              |
| 1000            | 2to5     | California               | California_N                                            | Field/<br>RemoteSensing             | O. clarkii, O.<br>kisutch, O.<br>mykiss, O.<br>tshawytscha | Juvenile,<br>Upmigration     | Disease, Flow,<br>Habitat                          | NA                                                                     | Species_interactions,<br>Environment,                 | NA                                     |

| Citation number | Duration | Region                      | Subregion                                                                          | Type of study                                                                | Species        | Life stage                           | Driver                                      | Response                                     | Driver Process                        | Response Process         |
|-----------------|----------|-----------------------------|------------------------------------------------------------------------------------|------------------------------------------------------------------------------|----------------|--------------------------------------|---------------------------------------------|----------------------------------------------|---------------------------------------|--------------------------|
| 1001            | 1        | Europe                      | NA                                                                                 | Field/<br>RemoteSensing,<br>Lab/<br>Experimental                             | S. salar       | Egg                                  | Dissolved_oxygen, Flow                      | Mortality                                    | Environment,                          | Demography               |
| 1002            | 10plus   | Alaska,<br>British_Columbia | Alaska_SE,<br>Alaska_W,<br>British_Columbia_Fraser,<br>British_Columbia_not_Fraser | Field/<br>RemoteSensing                                                      | O. nerka       | Marine                               | Climate_indices,<br>Temperature_marine      | Productivity                                 | Environment,                          | Demography               |
| 1003            | 10plus   | Largescale                  | NA                                                                                 | Field/<br>RemoteSensing                                                      | O. gorbuscha   | Marine                               | NA                                          | Productivity                                 |                                       | Demography               |
| 1004            | NA       | NA                          | NA                                                                                 | Model,<br>Theoretical/<br>Opinion                                            | General        | Evolution,<br>Population             | Ecosystem                                   | Productivity                                 | Species_interactions,                 | Demography               |
| 1005            | NA       | Northwest                   | Northwest_Columbia                                                                 | Review/<br>MetaAnalysis                                                      | O. clarkii     | Population                           | Management,<br>Restoration                  | Population_resilience                        | , Management                          | Demography               |
| 1006            | NA       | Northwest                   | Northwest_Columbia                                                                 | Theoretical/<br>Opinion                                                      | O. tshawytscha | Marine                               | Management,<br>Predators                    | Mortality                                    | Species_interactions,<br>, Management | Demography               |
| 1007            | 1        | Europe                      | NA                                                                                 | Lab/<br>Experimental                                                         | Other_fish     | Marine                               | Acidity                                     | Physiology_Condition                         | Environment,                          | Physiology               |
| 1008            | 1        | Europe                      | NA                                                                                 | Lab/<br>Experimental                                                         | Other_fish     | Marine                               | Acidity                                     | Performance                                  | Environment,                          | Physiology               |
| 1009            | 2to5     | Alaska                      | Alaska_SE                                                                          | Field/<br>RemoteSensing                                                      | O. gorbuscha   | Juvenile,<br>Marine,<br>Outmigration | Temperature_marine                          | Genetics_Adaptation,<br>Mortality, Phenology | Environment,                          | Demography,<br>Evolution |
| 1010            | 2to5     | Alaska                      | Alaska_SE                                                                          | Field/<br>RemoteSensing,<br>Lab/<br>Experimental                             | O. gorbuscha   | Upmigration                          | Genetics                                    | Mortality, Phenology                         | Evolution,                            | Demography               |
| 1011            | NA       | California                  | California_N                                                                       | Field/<br>RemoteSensing,<br>Lab/<br>Experimental,<br>Review/<br>MetaAnalysis | O. kisutch     | Juvenile                             | Density_Food,<br>Habitat,<br>Temperature_FW | Growth                                       | Species_interactions,<br>Environment, | Physiology               |

| Citation number | Duration | Region             | Subregion          | Type of study             | Species                        | Life stage             | Driver                               | Response                        | Driver Process                                  | Response Process       |
|-----------------|----------|--------------------|--------------------|---------------------------|--------------------------------|------------------------|--------------------------------------|---------------------------------|-------------------------------------------------|------------------------|
| 1012            | 2to5     | Northwest          | Northwest_Columbia | Field/RemoteSensing       | O. tshawytscha                 | Upmigration            | NA                                   | Behaviour, Mortality            |                                                 | Dispersal, Demography  |
| 1013            | NA       | Largescale         | NA                 | Theoretical/Opinion       | Salmonid_general               | Marine                 | Climate_indices                      | Mortality                       | Environment,                                    | Demography             |
| 1014            | NA       | Largescale         | NA                 | Theoretical/Opinion       | O. tshawytscha                 | General, Juvenile      | Temperature_FW                       | Population_resilience           | Environment,                                    | Demography             |
| 1015            | NA       | NA                 | NA                 | Theoretical/Opinion       | O. tshawytscha                 | Juvenile, Population   | Temperature_FW                       | Population_resilience           | Environment,                                    | Demography             |
| 1016            | NA       | Northwest          | Northwest_Columbia | Model, Projections/salmon | Salmonid_general               | Freshwater_habitat     | Flow, Temperature_FW                 | Population_resilience           | Environment,                                    | Demography             |
| 1017            | 10plus   | Europe             | NA                 | Field/RemoteSensing       | S. salar                       | Marine, Outmigration   | Density_Food, Predators, Prey        | Mortality                       | Species_interactions,                           | Demography             |
| 1018            | NA       | Northwest          | Northwest_Columbia | Field/RemoteSensing       | General                        | Juvenile, Outmigration | Habitat                              | NA                              | Environment,                                    | NA                     |
| 1019            | NA       | Europe             | NA                 | Review/MetaAnalysis       | General                        | Juvenile, Upmigration  | Disease, Management, Temperature_FW  | Population_resilience           | Species_interactions, Environment, , Management | Demography             |
| 1020            | 1        | Europe             | NA                 | Lab/Experimental          | Other_fish                     | Egg                    | Environment, Habitat, Temperature_FW | Mortality, Physiology_Condition | Environment,                                    | Demography, Physiology |
| 1021            | 10plus   | Europe             | NA                 | Field/RemoteSensing       | O. mykiss, S. salar, S. trutta | Juvenile, Upmigration  | Disease, Management                  | NA                              | Species_interactions, , Management              | NA                     |
| 1022            | 6to10    | East_North_America | NA                 | Field/RemoteSensing       | S. salar                       | Outmigration           | Habitat, Management, Temperature_FW  | Behaviour, Mortality            | Environment, , Management                       | Dispersal, Demography  |
| 1023            | 2to5     | Europe             | NA                 | Field/RemoteSensing       | S. salar, S. trutta            | Juvenile               | Density_Food, Ecosystem, Environment | Growth                          | Species_interactions, Environment,              | Physiology             |
| 1024            | 2to5     | Europe             | NA                 | Field/RemoteSensing       | S. salar                       | Juvenile               | Flow, Habitat                        | Habitat_Distribution            | Environment,                                    | Dispersal              |
| 1025            | 10plus   | Europe             | NA                 | Field/RemoteSensing       | Other_fish                     | Juvenile, Population   | Density_Food, Flow, Temperature_FW   | Productivity                    | Species_interactions, Environment,              | Demography             |

| Citation number | Duration | Region     | Subregion          | Type of study                                | Species                               | Life stage         | Driver                                              | Response                                      | Driver Process                     | Response Process                  |
|-----------------|----------|------------|--------------------|----------------------------------------------|---------------------------------------|--------------------|-----------------------------------------------------|-----------------------------------------------|------------------------------------|-----------------------------------|
| 1026            | 6to10    | Northwest  | Northwest_Columbia | Field/RemoteSensing, Model                   | O. tshawytscha, S. confluentus        | Freshwater_habitat | Environment, Habitat, Invasives, Temperature_FW     | Habitat_Distribution                          | Species_interactions, Environment, | Dispersal                         |
| 1027            | NA       | NA         | NA                 | Review/MetaAnalysis                          | General                               | Freshwater_habitat | Flow, Habitat, Temperature_FW                       | NA                                            | Environment,                       | NA                                |
| 1028            | NA       | Largescale | NA                 | Model, Projections/ecosystem                 | General                               | Marine             | Acidity, Density_Food, Ecosystem                    | NA                                            | Species_interactions, Environment, | NA                                |
| 1029            | NA       | Northwest  | Northwest_Columbia | Field/RemoteSensing                          | General                               | Juvenile           | Habitat, Restoration                                | Habitat_Distribution, Productivity            | Environment, , Management          | Dispersal, Demography             |
| 1030            | 10plus   | California | California_CV      | Field/RemoteSensing, Lab/Experimental, Model | O. tshawytscha                        | Egg, Juvenile      | Dissolved_oxygen, Flow, Temperature_FW              | Mortality                                     | Environment,                       | Demography                        |
| 1031            | 1        | California | California_CV      | Lab/Experimental                             | O. tshawytscha                        | Egg                | Dissolved_oxygen, Environment, Flow, Temperature_FW | Mortality, Performance                        | Environment,                       | Demography, Physiology            |
| 1032            | 2to5     | California | California_N       | Field/RemoteSensing                          | O. kisutch                            | Juvenile           | Density_Food, Environment, Habitat, Temperature_FW  | Growth                                        | Species_interactions, Environment, | Physiology                        |
| 1033            | 1        | Europe     | NA                 | Lab/Experimental                             | S. salar                              | Juvenile           | Environment, Temperature_FW                         | Behaviour                                     | Environment,                       | Dispersal                         |
| 1034            | NA       | NA         | NA                 | Field/RemoteSensing, Review/MetaAnalysis     | General, Other_fish, Salmonid_general | Evolution          | Genetics, Habitat                                   | Genetics_Adaptation, Life_history, Maturation | Evolution, Environment,            | Demography, Evolution, Physiology |
| 1035            | 1        | Northwest  | Northwest_Columbia | Field/RemoteSensing                          | O. tshawytscha                        | Outmigration       | Habitat, Management, Methods                        | Behaviour                                     | Environment, , Management          | Dispersal                         |

| Citation number | Duration | Region             | Subregion               | Type of study                                  | Species        | Life stage            | Driver                                 | Response                                                         | Driver Process                     | Response Process                  |
|-----------------|----------|--------------------|-------------------------|------------------------------------------------|----------------|-----------------------|----------------------------------------|------------------------------------------------------------------|------------------------------------|-----------------------------------|
| 1036            | 2to5     | British_Columbia   | British_Columbia_Fraser | Field/RemoteSensing                            | O. nerka       | Upmigration           | Habitat, Temperature_FW                | Mortality                                                        | Environment,                       | Demography                        |
| 1037            | 10plus   | British_Columbia   | British_Columbia_Fraser | Field/RemoteSensing, Model, Projections/salmon | O. nerka       | Spawning, Upmigration | Temperature_FW                         | Mortality, Phenology                                             | Environment,                       | Demography                        |
| 1038            | NA       | Largescale         | NA                      | Review/MetaAnalysis                            | O. nerka       | Marine, Population    | Temperature_FW, Temperature_marine     | Growth, Mortality, Phenology, Population_resilience              | Environment,                       | Demography, Physiology            |
| 1039            | NA       | Northwest          | Northwest_Columbia      | Field/RemoteSensing                            | O. mykiss      | Evolution             | Genetics, Habitat                      | Genetics_Adaptation                                              | Evolution, Environment,            | Evolution                         |
| 1040            | 1        | East_North_America | NA                      | Lab/Experimental                               | O. tshawytscha | Egg, Spawning         | Dissolved_oxygen, Flow, Temperature_FW | Carryover, Mortality, Physiology_Condition                       | Environment,                       | Demography, Physiology            |
| 1041            | 1        | British_Columbia   | British_Columbia_Fraser | Field/RemoteSensing                            | O. nerka       | Upmigration           | Habitat, Temperature_FW                | Behaviour, Habitat_Distribution, Mortality, Physiology_Condition | Environment,                       | Dispersal, Demography, Physiology |
| 1042            | 2to5     | East_North_America | NA                      | Field/RemoteSensing, Lab/Experimental          | S. fontinalis  | Juvenile              | Density_Food                           | Growth, Mortality                                                | Species_interactions,              | Demography, Physiology            |
| 1043            | NA       | NA                 | NA                      | Review/MetaAnalysis                            | General        | Evolution             | Management, Methods                    | Population_resilience                                            | , Management                       | Demography                        |
| 1044            | 1        | Europe             | NA                      | Lab/Experimental                               | Other_species  | Marine                | Acidity                                | Performance                                                      | Environment,                       | Physiology                        |
| 1045            | 10plus   | East_North_America | NA                      | Field/RemoteSensing                            | Other_fish     | Freshwater_habitat    | Invasives, Temperature_FW              | Growth, Mortality, Phenology                                     | Species_interactions, Environment, | Demography, Physiology            |
| 1046            | 1        | Northwest          | Northwest_Columbia      | Field/RemoteSensing                            | O. clarkii     | Juvenile, Upmigration | Fisheries, Temperature_FW              | Mortality                                                        | Environment, , Management          | Demography                        |
| 1047            | 10plus   | Alaska             | Alaska_S                | Field/RemoteSensing                            | O. nerka       | Population            | Environment                            | Productivity                                                     | Environment,                       | Demography                        |



| Citation number | Duration | Region             | Subregion                                 | Type of study                                    | Species          | Life stage                            | Driver                                                   | Response                                                       | Driver Process               | Response Process                        |
|-----------------|----------|--------------------|-------------------------------------------|--------------------------------------------------|------------------|---------------------------------------|----------------------------------------------------------|----------------------------------------------------------------|------------------------------|-----------------------------------------|
| 1048            | NA       | NA                 | NA                                        | Theoretical/<br>Opinion                          | General          | General                               | Management,<br>Methods                                   | Population_resilience                                          | , Management                 | Demography                              |
| 1049            | 2to5     | Alaska             | Alaska_SE                                 | Field/<br>RemoteSensing                          | O. keta          | Juvenile,<br>Spawning,<br>Upmigration | Management                                               | Behaviour, Carryover,<br>Physiology_Condition,<br>Productivity | , Management                 | Dispersal,<br>Demography,<br>Physiology |
| 1050            | 1        | East_North_America | NA                                        | Lab/<br>Experimental                             | S. salar         | Marine                                | Acidity,<br>Environment                                  | Growth,<br>Physiology_Condition                                | Environment,                 | Physiology                              |
| 1051            | NA       | Northwest          | Northwest_Columbia                        | Theoretical/<br>Opinion                          | Salmonid_general | Freshwater_habitat                    | Flow, Habitat,<br>Management,<br>Methods,<br>Restoration | NA                                                             | Environment, ,<br>Management | NA                                      |
| 1052            | NA       | British_Columbia   | British_Columbia_Fraser                   | Review/<br>MetaAnalysis                          | O. nerka         | Population                            | Fisheries,<br>Habitat,<br>Temperature_FW                 | Population_resilience                                          | Environment, ,<br>Management | Demography                              |
| 1053            | 2to5     | East_North_America | NA                                        | Field/<br>RemoteSensing,<br>Lab/<br>Experimental | Other_fish       | Evolution                             | Temperature_FW                                           | Growth, Performance,<br>Physiology_Condition                   | Environment,                 | Physiology                              |
| 1054            | 1        | East_North_America | NA                                        | Lab/<br>Experimental                             | S. fontinalis    | Evolution                             | Temperature_FW                                           | Performance,<br>Physiology_Condition                           | Environment,                 | Physiology                              |
| 1055            | 1        | East_North_America | NA                                        | Field/<br>RemoteSensing                          | Other_fish       | Upmigration                           | Flow, Habitat                                            | Behaviour                                                      | Environment,                 | Dispersal                               |
| 1056            | NA       | Northwest          | Northwest_Columbia                        | Projections/<br>physical                         | General          | Freshwater_habitat                    | Environment,<br>Habitat                                  | NA                                                             | Environment,                 | NA                                      |
| 1057            | NA       | NA                 | NA                                        | Theoretical/<br>Opinion                          | General          | Evolution                             | Environment,<br>Temperature_FW,<br>Temperature_marine    | Genetics_Adaptation                                            | Environment,                 | Evolution                               |
| 1058            | 2to5     | Northwest          | Northwest_Puget_Sound                     | Field/<br>RemoteSensing                          | General          | Freshwater_habitat                    | Flow                                                     | NA                                                             | Environment,                 | NA                                      |
| 1059            | 10plus   | Northwest          | Northwest_Columbia,<br>Northwest_Columbia | Model                                            | General          | Freshwater_habitat,<br>Upmigration    | Habitat,<br>Management,<br>Temperature_FW                | NA                                                             | Environment, ,<br>Management | NA                                      |

| Citation number | Duration | Region           | Subregion                   | Type of study                                        | Species                    | Life stage         | Driver                                     | Response                                               | Driver Process                     | Response Process                 |
|-----------------|----------|------------------|-----------------------------|------------------------------------------------------|----------------------------|--------------------|--------------------------------------------|--------------------------------------------------------|------------------------------------|----------------------------------|
| 1060            | NA       | Northwest        | Northwest_Columbia          | Model, Projections/<br>salmon                        | O. mykiss                  | Population         | Flow, Habitat, Restoration, Temperature_FW | Productivity                                           | Environment, ,<br>Management       | Demography                       |
| 1061            | 2to5     | Northwest        | Northwest_Columbia          | Field/<br>RemoteSensing, Lab/<br>Experimental, Model | O. tshawytscha             | Egg                | Flow, Habitat                              | Mortality                                              | Environment,                       | Demography                       |
| 1062            | 10plus   | British_Columbia | British_Columbia_not_Fraser | Field/<br>RemoteSensing                              | Other_species              | Marine             | Ecosystem, Environment                     | NA                                                     | Species_interactions, Environment, | NA                               |
| 1063            | NA       | NA               | NA                          | Review/<br>MetaAnalysis                              | General                    | Evolution, General | Temperature_FW                             | Genetics_Adaptation, Performance, Physiology_Condition | Environment,                       | Evolution, Physiology            |
| 1064            | 1        | British_Columbia | NA                          | Lab/<br>Experimental                                 | O. kisutch, O. tshawytscha | Evolution          | Genetics                                   | Genetics_Adaptation, Habitat_Distribution, Performance | Evolution,                         | Dispersal, Evolution, Physiology |
| 1065            | 10plus   | British_Columbia | British_Columbia_Fraser     | Field/<br>RemoteSensing                              | O. nerka                   | Population         | Climate_indices, Density_Food              | Productivity                                           | Species_interactions, Environment, | Demography                       |
| 1066            | 10plus   | British_Columbia | British_Columbia_Fraser     | Field/<br>RemoteSensing                              | O. gorbuscha, O. nerka     | Marine             | Density_Food                               | Growth, Mortality                                      | Species_interactions,              | Demography, Physiology           |
| 1067            | 10plus   | British_Columbia | British_Columbia_Fraser     | Field/<br>RemoteSensing                              | O. nerka                   | Juvenile, Marine   | Density_Food, Environment                  | Mortality                                              | Species_interactions, Environment, | Demography                       |
| 1068            | 2to5     | Northwest        | Northwest_Columbia          | Field/<br>RemoteSensing                              | O. clarkii                 | Spawning           | NA                                         | Habitat_Distribution, Phenology                        |                                    | Dispersal, Demography            |
| 1069            | 1        | Northwest        | Northwest_Columbia          | Field/<br>RemoteSensing                              | O. mykiss                  | Juvenile           | Temperature_FW                             | Maturation, Physiology_Condition                       | Environment,                       | Physiology                       |
| 1070            | 2to5     | California       | California_CV               | Field/<br>RemoteSensing                              | O. tshawytscha             | Evolution          | Genetics                                   | Genetics_Adaptation                                    | Evolution,                         | Evolution                        |
| 1071            | 2to5     | Europe           | NA                          | Lab/<br>Experimental                                 | S. trutta                  | Egg, Juvenile      | Genetics, Temperature_FW                   | Immune, Performance, Physiology_Condition              | Evolution, Environment,            | Physiology                       |
| 1072            | 1        | Northwest        | Northwest_Columbia          | Field/<br>RemoteSensing                              | General                    | Freshwater_habitat | Habitat, Temperature_FW                    | NA                                                     | Environment,                       | NA                               |

| Citation number | Duration | Region           | Subregion                                            | Type of study                                     | Species                           | Life stage                     | Driver                                                                      | Response                                                 | Driver Process                     | Response Process       |
|-----------------|----------|------------------|------------------------------------------------------|---------------------------------------------------|-----------------------------------|--------------------------------|-----------------------------------------------------------------------------|----------------------------------------------------------|------------------------------------|------------------------|
| 1073            | 1        | California       | California_CV                                        | Lab/<br>Experimental                              | O. mykiss                         | Egg                            | Temperature_<br>FW                                                          | Morphology, Mortality, Performance, Physiology_Condition | Environment,                       | Demography, Physiology |
| 1074            | 1        | British_Columbia | British_Columbia_Fraser, British_Columbia_not_Fraser | Lab/<br>Experimental                              | O. kisutch, O. nerka              | Juvenile, Marine               | Environment                                                                 | Carryover, Growth, Mortality                             | Environment,                       | Demography, Physiology |
| 1075            | 2to5     | Mountain_west    | NA                                                   | Field/<br>RemoteSensing, Model                    | General                           | Freshwater_habitat             | Dissolved_oxygen, Ecosystem, Environment, Flow, Habitat, Temperature_<br>FW | NA                                                       | Species_interactions, Environment, | NA                     |
| 1076            | 10plus   | California       | California_S                                         | Field/<br>RemoteSensing                           | Other_fish                        | Marine                         | Dissolved_oxygen                                                            | Behaviour, Habitat_Distribution                          | Environment,                       | Dispersal              |
| 1077            | NA       | Northwest        | Northwest_Columbia                                   | Model                                             | O. clarkii, O. mykiss, Other_fish | Population, Spawning           | Dissolved_oxygen                                                            | Growth, Maturation, Morphology, Physiology_Condition     | Environment,                       | Physiology             |
| 1078            | NA       | California       | California_CV                                        | Review/<br>MetaAnalysis                           | O. tshawytscha                    | Population                     | Flow, Management, Temperature_<br>FW                                        | Population_resilience, Productivity                      | Environment, , Management          | Demography             |
| 1079            | 10plus   | Mountain_west    | NA                                                   | Model, Projections/<br>salmon                     | O. mykiss, S. fontinalis          | Egg, Juvenile                  | Flow, Habitat                                                               | Mortality                                                | Environment,                       | Demography             |
| 1080            | 6to10    | California       | California_S                                         | Field/<br>RemoteSensing, Projections/<br>physical | O. mykiss                         | Freshwater_habitat             | Temperature_<br>FW                                                          | NA                                                       | Environment,                       | NA                     |
| 1081            | 10plus   | California       | California_CV                                        | Field/<br>RemoteSensing                           | O. tshawytscha                    | Juvenile, Marine, Outmigration | Flow                                                                        | Carryover, Mortality                                     | Environment,                       | Demography             |
| 1082            | 2to5     | California       | California_CV                                        | Field/<br>RemoteSensing                           | O. tshawytscha                    | Juvenile, Outmigration         | Flow                                                                        | Mortality                                                | Environment,                       | Demography             |
| 1083            | 6to10    | California       | California_CV                                        | Field/<br>RemoteSensing                           | O. tshawytscha                    | Juvenile                       | Flow, Habitat, Management                                                   | Mortality                                                | Environment, , Management          | Demography             |

| Citation number | Duration | Region                   | Subregion                           | Type of study           | Species          | Life stage              | Driver                                                       | Response                                           | Driver Process                        | Response Process                        |
|-----------------|----------|--------------------------|-------------------------------------|-------------------------|------------------|-------------------------|--------------------------------------------------------------|----------------------------------------------------|---------------------------------------|-----------------------------------------|
| 1084            | 1        | California               | California_CV                       | Field/<br>RemoteSensing | Other_fish       | Juvenile                | Environment,<br>Habitat,<br>Predators,<br>Temperature_<br>FW | Mortality                                          | Species_interactions,<br>Environment, | Demography                              |
| 1085            | 2to5     | British_Columbia         | British_Columbia_Fraser             | Field/<br>RemoteSensing | O. nerka         | Upmigration             | Environment,<br>Habitat,<br>Temperature_<br>FW               | Behaviour,<br>Physiology_Condition                 | Environment,                          | Dispersal,<br>Physiology                |
| 1086            | 10plus   | East_North_America       | NA                                  | Field/<br>RemoteSensing | S. salar         | Marine                  | Climate_indices,<br>Temperature_<br>marine                   | Habitat_Distribution,<br>Maturation, Mortality     | Environment,                          | Dispersal,<br>Demography,<br>Physiology |
| 1087            | NA       | NA                       | NA                                  | Review/<br>MetaAnalysis | General          | Marine                  | NA                                                           | Genetics_Adaptation,<br>Habitat_Distribution       |                                       | Dispersal,<br>Evolution*                |
| 1088            | 10plus   | Northwest                | Northwest_Columbia                  | Field/<br>RemoteSensing | O. tshawytscha   | Marine                  | Density_Food,<br>Environment,<br>Predators,<br>Prey          | Growth, Mortality                                  | Species_interactions,<br>Environment, | Demography,<br>Physiology               |
| 1089            | 10plus   | Northwest                | Northwest_Columbia                  | Field/<br>RemoteSensing | O. tshawytscha   | Marine                  | Climate_indices,<br>Density_Food,<br>Prey                    | Growth, Mortality                                  | Species_interactions,<br>Environment, | Demography,<br>Physiology               |
| 1090            | 2to5     | Northwest                | Northwest_Coastal                   | Field/<br>RemoteSensing | Other_species    | Marine                  | Density_Food,<br>Ecosystem,<br>Environment                   | Productivity                                       | Species_interactions,<br>Environment, | Demography                              |
| 1091            | NA       | NA                       | NA                                  | Review/<br>MetaAnalysis | Salmonid_general | General,<br>Upmigration | Disease,<br>Invasives                                        | Population_resilience                              | Species_interactions,                 | Demography                              |
| 1092            | 1        | California,<br>Northwest | California_N,<br>Northwest_Columbia | Lab/<br>Experimental    | O. mykiss        | Evolution               | Genetics,<br>Habitat                                         | Genetics_Adaptation                                | Evolution,<br>Environment,            | Evolution                               |
| 1093            | 1        | East_North_America       | NA                                  | Lab/<br>Experimental    | O. mykiss        | Juvenile                | Dissolved_oxygen                                             | Performance,<br>Physiology_Condition               | Environment,                          | Physiology                              |
| 1094            | 1        | East_North_America       | NA                                  | Lab/<br>Experimental    | Other_fish       | Marine                  | Acidity,<br>Dissolved_oxygen                                 | Mortality,<br>Performance,<br>Physiology_Condition | Environment,                          | Demography,<br>Physiology               |

| Citation number | Duration | Region                 | Subregion                   | Type of study                                    | Species                                                                | Life stage              | Driver                                                       | Response                                                               | Driver Process                        | Response Process                        |
|-----------------|----------|------------------------|-----------------------------|--------------------------------------------------|------------------------------------------------------------------------|-------------------------|--------------------------------------------------------------|------------------------------------------------------------------------|---------------------------------------|-----------------------------------------|
| 1095            | 1        | Europe                 | NA                          | Field/<br>RemoteSensing,<br>Lab/<br>Experimental | S. salar                                                               | Juvenile                | Flow, Habitat,<br>Management                                 | Behaviour                                                              | Environment, ,<br>Management          | Dispersal                               |
| 1096            | 10plus   | Alaska                 | Alaska_SE                   | Field/<br>RemoteSensing                          | General, O.<br>gorbuscha,<br>Other_fish,<br>Other_species,<br>S. malma | General                 | Density_Food,<br>Habitat                                     | Productivity                                                           | Species_interactions,<br>Environment, | Demography                              |
| 1097            | 10plus   | Alaska                 | Alaska_SE                   | Field/<br>RemoteSensing                          | General                                                                | Freshwater_ha<br>bitat  | Density_Food,<br>Flow, Habitat                               | Productivity                                                           | Species_interactions,<br>Environment, | Demography                              |
| 1098            | 10plus   | Alaska                 | Alaska_SE                   | Field/<br>RemoteSensing                          | O. gorbuscha                                                           | Egg, Juvenile           | Density_Food,<br>Flow                                        | Mortality                                                              | Species_interactions,<br>Environment, | Demography                              |
| 1099            | 2to5     | Japan                  | NA                          | Field/<br>RemoteSensing,<br>Lab/<br>Experimental | O. keta                                                                | Marine                  | Methods                                                      | Habitat_Distribution                                                   |                                       | Dispersal                               |
| 1100            | 2to5     | British_Colum<br>bia   | British_Columb<br>ia_Fraser | Field/<br>RemoteSensing                          | O. nerka                                                               | Upmigration             | Flow,<br>Temperature_<br>FW                                  | Mortality,<br>Performance,<br>Physiology_Condition,<br>Productivity    | Environment,                          | Demography,<br>Physiology               |
| 1101            | 10plus   | Northwest              | Northwest_Col<br>umbia      | Field/<br>RemoteSensing,<br>Model                | O. tshawytscha                                                         | Juvenile,<br>Population | Contaminants,<br>Dissolved_oxyg<br>en,<br>Temperature_<br>FW | Genetics_Adaptation,<br>Habitat_Distribution,<br>Population_resilience | Environment,                          | Dispersal,<br>Demography,<br>Evolution* |
| 1102            | 1        | East_North_A<br>merica | NA                          | Lab/<br>Experimental                             | O. tshawytscha                                                         | Juvenile                | Temperature_<br>FW                                           | Growth                                                                 | Environment,                          | Physiology                              |
| 1103            | 2to5     | East_North_A<br>merica | NA                          | Field/<br>RemoteSensing                          | Other_fish                                                             | Egg                     | Management,<br>Methods                                       | NA                                                                     | , Management                          | NA                                      |
| 1104            | NA       | NA                     | NA                          | Review/<br>MetaAnalysis                          | General                                                                | General                 | Contaminants                                                 | NA                                                                     | Environment,                          | NA                                      |
| 1105            | 2to5     | British_Colum<br>bia   | British_Columb<br>ia_Fraser | Field/<br>RemoteSensing,<br>Model                | O. mykiss                                                              | Juvenile                | Density_Food,<br>Predators,<br>Temperature_<br>FW            | Mortality,<br>Physiology_Condition                                     | Species_interactions,<br>Environment, | Demography,<br>Physiology               |

| Citation number | Duration | Region                 | Subregion                       | Type of study                     | Species                    | Life stage              | Driver                                              | Response                                      | Driver Process                                        | Response Process                                      |
|-----------------|----------|------------------------|---------------------------------|-----------------------------------|----------------------------|-------------------------|-----------------------------------------------------|-----------------------------------------------|-------------------------------------------------------|-------------------------------------------------------|
| 1106            | 1        | Europe                 | NA                              | Field/<br>RemoteSensing           | S. trutta                  | Marine                  | Disease,<br>Environment,<br>Temperature_<br>FW      | Behaviour                                     | Species_interactions,<br>Environment,                 | Dispersal                                             |
| 1107            | 1        | California             | California_N                    | Field/<br>RemoteSensing           | O. tshawytscha             | Spawning                | Flow, Habitat                                       | Habitat_Distribution                          | Environment,                                          | Dispersal                                             |
| 1108            | 10plus   | Europe                 | NA                              | Field/<br>RemoteSensing,<br>Model | Other_fish                 | Marine,<br>Population   | Fisheries,<br>Management,<br>Temperature_<br>marine | Productivity                                  | Environment, ,<br>Management                          | Demography                                            |
| 1109            | 2to5     | California             | California_CV                   | Field/<br>RemoteSensing,<br>Model | O. tshawytscha             | Juvenile                | Flow, Habitat                                       | Habitat_Distribution                          | Environment,                                          | Dispersal                                             |
| 1110            | 2to5     | East_North_A<br>merica | NA                              | Field/<br>RemoteSensing           | S. fontinalis, S.<br>salar | Freshwater_ha<br>bitat  | Habitat,<br>Temperature_<br>FW                      | NA                                            | Environment,                                          | NA                                                    |
| 1111            | 1        | South_Americ<br>a      | NA                              | Lab/<br>Experimental              | Other_species              | Marine                  | Acidity,<br>Disease                                 | NA                                            | Species_interactions,<br>Environment,                 | NA                                                    |
| 1112            | 1        | East_North_A<br>merica | NA                              | Field/<br>RemoteSensing           | S. salar, S. trutta        | Upmigration             | Temperature_<br>FW                                  | Behaviour, Phenology,<br>Physiology_Condition | Environment,                                          | Dispersal,<br>Demography,<br>Physiology<br>Demography |
| 1113            | 2to5     | Alaska                 | Alaska_W                        | Field/<br>RemoteSensing           | O. nerka                   | Spawning                | NA                                                  | Phenology                                     |                                                       | Demography                                            |
| 1114            | 6to10    | British_Colum<br>bia   | British_Columb<br>ia_not_Fraser | Field/<br>RemoteSensing           | O. mykiss                  | Population              | NA                                                  | Life_history,<br>Population_resilience        |                                                       | Demography                                            |
| 1115            | 1        | Northwest              | Northwest_Pu<br>get_Sound       | Field/<br>RemoteSensing           | O. mykiss                  | Marine                  | Habitat,<br>Management,<br>Predators                | Habitat_Distribution,<br>Mortality            | Species_interactions,<br>Environment, ,<br>Management | Dispersal,<br>Demography                              |
| 1116            | 2to5     | Northwest              | Northwest_Pu<br>get_Sound       | Field/<br>RemoteSensing           | O. mykiss                  | Marine,<br>Outmigration | Predators,<br>Temperature_<br>marine                | Mortality                                     | Species_interactions,<br>Environment,                 | Demography                                            |
| 1117            | 2to5     | Northwest              | Northwest_Pu<br>get_Sound       | Field/<br>RemoteSensing           | O. mykiss                  | Juvenile,<br>Marine     | Habitat,<br>Management                              | Mortality                                     | Environment, ,<br>Management                          | Demography                                            |
| 1118            | NA       | Mountain_we<br>st      | NA                              | Model,<br>Projections/<br>salmon  | O. mykiss                  | Juvenile                | Flow, Habitat,<br>Temperature_<br>FW                | Habitat_Distribution,<br>Physiology_Condition | Environment,                                          | Dispersal,<br>Physiology                              |
| 1119            | NA       | Largescale             | NA                              | Field/<br>RemoteSensing           | O. tshawytscha             | Evolution               | Habitat                                             | Genetics_Adaptation                           | Environment,                                          | Evolution                                             |

| Citation number | Duration | Region             | Subregion | Type of study                                                                | Species                         | Life stage                           | Driver                                          | Response                                           | Driver Process                        | Response Process          |
|-----------------|----------|--------------------|-----------|------------------------------------------------------------------------------|---------------------------------|--------------------------------------|-------------------------------------------------|----------------------------------------------------|---------------------------------------|---------------------------|
| 1120            | NA       | NA                 | NA        | Review/<br>MetaAnalysis                                                      | General                         | Egg, Juvenile                        | Flow,<br>Management                             | Mortality                                          | Environment, ,<br>Management          | Demography                |
| 1121            | 1        | Europe             | NA        | Lab/<br>Experimental                                                         | O. mykiss                       | Outmigration                         | Environment                                     | Behaviour,<br>Performance,<br>Physiology_Condition | Environment,                          | Dispersal,<br>Physiology  |
| 1122            | 1        | East_North_America | NA        | Lab/<br>Experimental                                                         | S. salar                        | Juvenile                             | Temperature_<br>FW                              | Growth, Performance                                | Environment,                          | Physiology                |
| 1123            | NA       | Japan              | NA        | Theoretical/<br>Opinion                                                      | O. keta                         | Upmigration                          | Fisheries,<br>Management                        | Genetics_Adaptation,<br>Phenology                  | , Management                          | Demography,<br>Evolution  |
| 1124            | 2to5     | Japan              | NA        | Field/<br>RemoteSensing                                                      | O. gorbuscha                    | Upmigration                          | Temperature_<br>FW,<br>Temperature_<br>marine   | Behaviour, Life_history                            | Environment,                          | Dispersal,<br>Demography  |
| 1125            | 10plus   | Japan              | NA        | Field/<br>RemoteSensing                                                      | O. keta                         | Juvenile,<br>Marine,<br>Outmigration | Temperature_<br>FW                              | Carryover, Mortality                               | Environment,                          | Demography                |
| 1126            | 10plus   | Largescale         | NA        | Field/<br>RemoteSensing                                                      | O. gorbuscha, O. keta, O. nerka | Marine                               | Density_Food                                    | Growth, Maturation                                 | Species_interactions,                 | Physiology                |
| 1127            | 2to5     | Japan              | NA        | Field/<br>RemoteSensing                                                      | O. masou                        | Juvenile                             | Density_Food,<br>Habitat,<br>Temperature_<br>FW | Growth, Maturation                                 | Species_interactions,<br>Environment, | Physiology                |
| 1128            | 1        | Alaska, Russia     | Alaska_W  | Theoretical/<br>Opinion                                                      | O. gorbuscha, O. keta, O. nerka | Marine                               | Temperature_<br>marine                          | Habitat_Distribution                               | Environment,                          | Dispersal                 |
| 1129            | 1        | Largescale         | NA        | Field/<br>RemoteSensing,<br>Lab/<br>Experimental,<br>Theoretical/<br>Opinion | O. gorbuscha, O. keta, O. nerka | Marine                               | Temperature_<br>marine                          | Growth,<br>Habitat_Distribution                    | Environment,                          | Dispersal,<br>Physiology  |
| 1130            | 1        | Japan              | NA        | Field/<br>RemoteSensing                                                      | O. masou                        | Outmigration                         | Habitat,<br>Temperature_<br>FW                  | Growth, Life_history,<br>Phenology                 | Environment,                          | Demography,<br>Physiology |
| 1131            | 2to5     | Europe             | NA        | Field/<br>RemoteSensing,<br>Model                                            | S. salar                        | Marine                               | Environment,<br>Temperature_<br>marine          | Behaviour, Growth,<br>Habitat_Distribution         | Environment,                          | Dispersal,<br>Physiology  |

| Citation number | Duration | Region             | Subregion             | Type of study                                   | Species                                        | Life stage                     | Driver                                                 | Response                                    | Driver Process                     | Response Process      |
|-----------------|----------|--------------------|-----------------------|-------------------------------------------------|------------------------------------------------|--------------------------------|--------------------------------------------------------|---------------------------------------------|------------------------------------|-----------------------|
| 1132            | NA       | Largescale         | NA                    | Model, Projections/<br>ecosystem                | General, Other_fish, Other_species             | Marine                         | Temperature_marine                                     | Habitat_Distribution                        | Environment,                       | Dispersal             |
| 1133            | NA       | Europe             | NA                    | Review/<br>MetaAnalysis                         | Other_fish, Other_species, S. salar, S. trutta | General, Juvenile, Upmigration | Disease, Ecosystem, Environment, Flow                  | Mortality                                   | Species_interactions, Environment, | Demography            |
| 1134            | 2to5     | Northwest          | Northwest_Puget_Sound | Field/<br>RemoteSensing                         | O. tshawytscha                                 | Freshwater_habitat, Juvenile   | Density_Food, Ecosystem, Management, Prey, Restoration | Behaviour                                   | Species_interactions, , Management | Dispersal             |
| 1135            | 1        | Northwest          | Northwest_Columbia    | Field/<br>RemoteSensing, Model                  | O. tshawytscha                                 | Outmigration                   | Flow                                                   | Behaviour, Growth, Habitat_Distribution     | Environment,                       | Dispersal, Physiology |
| 1136            | NA       | Northwest          | Northwest_Columbia    | Model                                           | Salmonid_general                               | General                        | Fisheries, Flow, Management                            | Livelihood                                  | Environment, , Management          | Management            |
| 1137            | 2to5     | Alaska             | Alaska_W              | Field/<br>RemoteSensing                         | O. tshawytscha                                 | Upmigration                    | Habitat                                                | Behaviour, Phenology                        | Environment,                       | Dispersal, Demography |
| 1138            | 1        | California         | California_CV         | Field/<br>RemoteSensing                         | O. tshawytscha                                 | Upmigration                    | Management                                             | Behaviour, Mortality                        | , Management                       | Dispersal, Demography |
| 1139            | NA       | NA                 | NA                    | Review/<br>MetaAnalysis                         | General                                        | Marine                         | Acidity                                                | NA                                          | Environment,                       | NA                    |
| 1140            | 1        | Europe             | NA                    | Field/<br>RemoteSensing, Lab/<br>Experimental   | Other_fish, S. trutta                          | Upmigration                    | Temperature_FW                                         | Performance, Physiology_Condition           | Environment,                       | Physiology            |
| 1141            | 1        | East_North_America | NA                    | Lab/<br>Experimental                            | O. mykiss                                      | Marine                         | Dissolved_oxygen, Temperature_FW                       | Performance, Physiology_Condition           | Environment,                       | Physiology            |
| 1142            | NA       | Europe             | NA                    | Model, Projections/<br>ecosystem                | General                                        | Marine                         | Ecosystem, Environment, Methods                        | Habitat_Distribution                        | Species_interactions, Environment, | Dispersal             |
| 1143            | NA       | California         | NA                    | Projections/<br>salmon, Review/<br>MetaAnalysis | Other_fish, Salmonid_general                   | Population                     | Flow, Invasives, Temperature_FW                        | Habitat_Distribution, Population_resilience | Species_interactions, Environment, | Dispersal, Demography |



| Citation number | Duration | Region                | Subregion                   | Type of study                         | Species               | Life stage  | Driver                                                               | Response                                                 | Driver Process                     | Response Process       |
|-----------------|----------|-----------------------|-----------------------------|---------------------------------------|-----------------------|-------------|----------------------------------------------------------------------|----------------------------------------------------------|------------------------------------|------------------------|
| 1144            | 10plus   | Mountain_west         | NA                          | Field/RemoteSensing                   | O. clarkii, O. mykiss | Evolution   | Flow, Invasives, Temperature_FW                                      | Genetics_Adaptation                                      | Species_interactions, Environment, | Evolution              |
| 1145            | 10plus   | California, Northwest | NA                          | Field/RemoteSensing, Model            | General               | Marine      | Climate_indices, Ecosystem, Environment, Methods, Temperature_marine | Habitat_Distribution                                     | Species_interactions, Environment, | Dispersal              |
| 1146            | 1        | East_North_America    | NA                          | Lab/Experimental                      | O. nerka, S. salar    | Juvenile    | Methods, Temperature_FW                                              | Performance, Physiology_Condition                        | Environment,                       | Physiology             |
| 1147            | 2to5     | East_North_America    | NA                          | Field/RemoteSensing                   | Other_fish            | Marine      | Habitat, Temperature_marine                                          | Behaviour                                                | Environment,                       | Dispersal              |
| 1148            | 1        | Europe                | NA                          | Lab/Experimental                      | O. mykiss             | Juvenile    | Habitat, Management                                                  | Behaviour                                                | Environment, , Management          | Dispersal              |
| 1149            | 1        | Australia_New Zealand | NA                          | Lab/Experimental                      | Other_fish            | Marine      | Acidity                                                              | Performance                                              | Environment,                       | Physiology             |
| 1150            | 1        | Australia_New Zealand | NA                          | Field/RemoteSensing, Lab/Experimental | General               | Marine      | Acidity                                                              | Productivity                                             | Environment,                       | Demography             |
| 1151            | 1        | Australia_New Zealand | NA                          | Lab/Experimental                      | Other_fish            | Marine      | Acidity                                                              | Mortality, Physiology_Condition                          | Environment,                       | Demography, Physiology |
| 1152            | 1        | Australia_New Zealand | NA                          | Lab/Experimental                      | Other_fish            | Marine      | Acidity, Temperature_FW                                              | Performance                                              | Environment,                       | Physiology             |
| 1153            | 1        | Australia_New Zealand | NA                          | Lab/Experimental                      | Other_fish            | Marine      | Acidity                                                              | Physiology_Condition                                     | Environment,                       | Physiology             |
| 1154            | 10plus   | Alaska                | Alaska_W                    | Field/RemoteSensing                   | O. tshawytscha        | Upmigration | Environment, Temperature_FW, Temperature_marine                      | Phenology                                                | Environment,                       | Demography             |
| 1155            | 1        | British_Columbia      | British_Columbia_not_Fraser | Projections/salmon                    | O. tshawytscha        | Juvenile    | Genetics, Temperature_FW                                             | Performance, Physiology_Condition, Population_resilience | Evolution, Environment,            | Demography, Physiology |

| Citation number | Duration | Region                         | Subregion                                   | Type of study                                       | Species                                 | Life stage                                             | Driver                                               | Response                                           | Driver Process                        | Response Process          |
|-----------------|----------|--------------------------------|---------------------------------------------|-----------------------------------------------------|-----------------------------------------|--------------------------------------------------------|------------------------------------------------------|----------------------------------------------------|---------------------------------------|---------------------------|
| 1156            | NA       | NA                             | NA                                          | Theoretical/<br>Opinion                             | Salmonid_<br>general                    | General                                                | Temperature_<br>FW,<br>Temperature_<br>marine        | Population_resilience                              | Environment,                          | Demography                |
| 1157            | 1        | British_Columbia               | British_Columbia_not_Fraser                 | Lab/<br>Experimental                                | O. tshawytscha                          | Egg, Evolution,<br>Spawning                            | Genetics,<br>Temperature_<br>FW                      | Carryover,<br>Performance,<br>Physiology_Condition | Evolution,<br>Environment,            | Demography,<br>Physiology |
| 1158            | 10plus   | California                     | California_CV                               | Field/<br>RemoteSensing                             | O. tshawytscha                          | Juvenile,<br>Outmigration                              | Flow,<br>Temperature_<br>FW                          | Growth, Phenology                                  | Environment,                          | Demography,<br>Physiology |
| 1159            | 10plus   | California                     | California_CV                               | Field/<br>RemoteSensing                             | O. tshawytscha                          | Juvenile                                               | Flow, Habitat,<br>Temperature_<br>FW                 | Habitat_Distribution,<br>Productivity              | Environment,                          | Dispersal,<br>Demography  |
| 1160            | NA       | NA                             | NA                                          | Review/<br>MetaAnalysis,<br>Theoretical/<br>Opinion | Salmonid_<br>general                    | General                                                | Ecosystem,<br>Management                             | Population_resilience                              | Species_interactions,<br>, Management | Demography                |
| 1161            | 6to10    | British_Columbia,<br>Northwest | Northwest_Columbia                          | Field/<br>RemoteSensing                             | O. nerka                                | Marine,<br>Outmigration,<br>Population,<br>Upmigration | Temperature_<br>marine                               | Maturation, Mortality                              | Environment,                          | Demography,<br>Physiology |
| 1162            | NA       | Alaska                         | Alaska_S,<br>Alaska_SE,<br>Alaska_W         | Field/<br>RemoteSensing                             | Other_fish,<br>Salmonid_<br>general     | Freshwater_habitat,<br>Population                      | Environment,<br>Flow, Habitat,<br>Temperature_<br>FW | Habitat_Distribution                               | Environment,                          | Dispersal                 |
| 1163            | 2to5     | Northwest                      | Northwest_Columbia                          | Field/<br>RemoteSensing,<br>Model                   | O. tshawytscha                          | Juvenile                                               | Habitat,<br>Methods, Prey,<br>Temperature_<br>FW     | Growth                                             | Species_interactions,<br>Environment, | Physiology                |
| 1164            | 6to10    | Northwest                      | Northwest_Columbia                          | Field/<br>RemoteSensing                             | Other_species                           | Freshwater_habitat, Juvenile                           | Environment,<br>Flow, Prey                           | NA                                                 | Species_interactions,<br>Environment, | NA                        |
| 1165            | 1        | Northwest                      | Northwest_Coastal,<br>Northwest_Puget_Sound | Lab/<br>Experimental                                | O. tshawytscha,<br>Salmonid_<br>general | Juvenile                                               | Disease,<br>Temperature_<br>FW                       | NA                                                 | Species_interactions,<br>Environment, | NA                        |
| 1166            | 10plus   | Alaska                         | Alaska_W                                    | Field/<br>RemoteSensing                             | O. tshawytscha                          | Marine                                                 | Density_Food                                         | Mortality, Productivity                            | Species_interactions,                 | Demography                |

| Citation number | Duration | Region           | Subregion                                      | Type of study                                                | Species                                         | Life stage          | Driver                                              | Response                               | Driver Process                        | Response Process         |
|-----------------|----------|------------------|------------------------------------------------|--------------------------------------------------------------|-------------------------------------------------|---------------------|-----------------------------------------------------|----------------------------------------|---------------------------------------|--------------------------|
| 1167            | NA       | Alaska           | Alaska_W                                       | Review/<br>MetaAnalysis                                      | General                                         | General             | Ecosystem,<br>Environment                           | Livelihood                             | Species_interactions,<br>Environment, | Management               |
| 1168            | NA       | NA               | NA                                             | Review/<br>MetaAnalysis                                      | General,<br>Other_fish,<br>Salmonid_<br>general | Population          | Environment                                         | Population_resilience,<br>Productivity | Environment,                          | Demography               |
| 1169            | 2to5     | Northwest        | Northwest_Columbia                             | Field/<br>RemoteSensing                                      | O. mykiss                                       | Juvenile            | Density_Food,<br>Temperature_<br>FW                 | Behaviour, Growth                      | Species_interactions,<br>Environment, | Dispersal,<br>Physiology |
| 1170            | 1        | Northwest        | Northwest_Columbia                             | Field/<br>RemoteSensing,<br>Model,<br>Projections/<br>salmon | O. mykiss                                       | Juvenile            | Density_Food,<br>Temperature_<br>FW                 | Growth                                 | Species_interactions,<br>Environment, | Physiology               |
| 1171            | 2to5     | Northwest        | Northwest_Columbia                             | Field/<br>RemoteSensing                                      | O. mykiss                                       | Juvenile            | Density_Food,<br>Temperature_<br>FW                 | Growth,<br>Physiology_Condition        | Species_interactions,<br>Environment, | Physiology               |
| 1172            | 2to5     | British_Columbia | British_Columbia_Fraser                        | Lab/<br>Experimental                                         | O. nerka                                        | Upmigration         | Flow                                                | Performance,<br>Physiology_Condition   | Environment,                          | Physiology               |
| 1173            | 10plus   | Northwest        | Northwest_Columbia                             | Field/<br>RemoteSensing                                      | Salmonid_<br>general                            | Freshwater_habitat  | Climate_indices,<br>Habitat,<br>Management          | NA                                     | Environment, ,<br>Management          | NA                       |
| 1174            | 10plus   | Northwest        | Northwest_Columbia                             | Review/<br>MetaAnalysis                                      | Salmonid_<br>general                            | Freshwater_habitat  | Climate_indices,<br>Flow,<br>Habitat,<br>Management | NA                                     | Environment, ,<br>Management          | NA                       |
| 1175            | 2to5     | Japan            | NA                                             | Lab/<br>Experimental                                         | O. keta                                         | Juvenile,<br>Marine | Density_Food,<br>Temperature_<br>FW                 | Growth                                 | Species_interactions,<br>Environment, | Physiology               |
| 1176            | 1        | British_Columbia | British_Columbia_Fraser                        | Field/<br>RemoteSensing                                      | O. kisutch, O.<br>mykiss                        | Juvenile            | Density_Food,<br>Flow                               | Habitat_Distribution                   | Species_interactions,<br>Environment, | Dispersal                |
| 1177            | NA       | British_Columbia | British_Columbia_Fraser,<br>Northwest_Columbia | Field/<br>RemoteSensing,<br>Model                            | O. clarkii, O.<br>mykiss                        | Juvenile            | Habitat                                             | Habitat_Distribution                   | Environment,                          | Dispersal                |
| 1178            | NA       | NA               | NA                                             | Model                                                        | Salmonid_<br>general                            | Juvenile            | Density_Food,<br>Flow, Methods                      | Behaviour,<br>Physiology_Condition     | Species_interactions,<br>Environment, | Dispersal,<br>Physiology |

| Citation number | Duration | Region                   | Subregion             | Type of study              | Species        | Life stage                 | Driver                              | Response                                               | Driver Process                                  | Response Process      |
|-----------------|----------|--------------------------|-----------------------|----------------------------|----------------|----------------------------|-------------------------------------|--------------------------------------------------------|-------------------------------------------------|-----------------------|
| 1179            | 1        | Mountain_west, Northwest | NA                    | Lab/Experimental           | O. mykiss      | Evolution                  | Genetics                            | Performance, Physiology_Condition                      | Evolution,                                      | Physiology            |
| 1180            | NA       | Northwest                | Northwest_Columbia    | Field/RemoteSensing        | O. mykiss      | Egg, Evolution             | Genetics, Habitat                   | Genetics_Adaptation, Performance, Physiology_Condition | Evolution, Environment,                         | Evolution, Physiology |
| 1181            | 1        | Northwest                | Northwest_Columbia    | Lab/Experimental           | O. mykiss      | Evolution                  | Genetics, Habitat                   | Genetics_Adaptation, Performance, Physiology_Condition | Evolution, Environment,                         | Evolution, Physiology |
| 1182            | 6to10    | Northwest                | Northwest_Columbia    | Field/RemoteSensing        | O. tshawytscha | Spawning                   | Methods                             | NA                                                     |                                                 | NA                    |
| 1183            | 2to5     | Northwest                | Northwest_Columbia    | Field/RemoteSensing        | O. tshawytscha | Upmigration                | Habitat, Management, Temperature_FW | Behaviour, Mortality                                   | Environment, , Management                       | Dispersal, Demography |
| 1184            | NA       | Largescale               | NA                    | Review/MetaAnalysis        | General        | Freshwater_habitat, Marine | Ecosystem, Environment              | NA                                                     | Species_interactions, Environment,              | NA                    |
| 1185            | 1        | Northwest                | Northwest_Columbia    | Lab/Experimental           | O. tshawytscha | Juvenile                   | Disease, Temperature_FW             | Mortality                                              | Species_interactions, Environment,              | Demography            |
| 1186            | 1        | Alaska                   | Alaska_S              | Field/RemoteSensing        | O. kisutch     | Juvenile                   | Habitat                             | Habitat_Distribution                                   | Environment,                                    | Dispersal             |
| 1187            | 6to10    | Mountain_west            | NA                    | Field/RemoteSensing        | O. mykiss      | Juvenile, Upmigration      | Disease, Management, Temperature_FW | NA                                                     | Species_interactions, Environment, , Management | NA                    |
| 1188            | 10plus   | Northwest                | Northwest_Puget_Sound | Field/RemoteSensing        | O. tshawytscha | Juvenile, Marine           | Management, Predators               | Mortality, Phenology                                   | Species_interactions, , Management              | Demography            |
| 1189            | 2to5     | Northwest                | Northwest_Columbia    | Field/RemoteSensing, Model | O. tshawytscha | Freshwater_habitat         | Flow, Habitat                       | Habitat_Distribution                                   | Environment,                                    | Dispersal             |
| 1190            | 10plus   | Alaska                   | Alaska_W              | Field/RemoteSensing        | O. tshawytscha | Juvenile                   | Density_Food, Flow, Habitat         | Habitat_Distribution, Productivity                     | Species_interactions, Environment,              | Dispersal, Demography |
| 1191            | NA       | Mountain_west            | NA                    | Model, Projections/salmon  | O. clarkii     | Population                 | Management, Methods                 | Population_resilience                                  | , Management                                    | Demography            |

| Citation number | Duration | Region                 | Subregion              | Type of study                    | Species                                                                           | Life stage               | Driver                                                            | Response                                            | Driver Process                                       | Response Process                    |
|-----------------|----------|------------------------|------------------------|----------------------------------|-----------------------------------------------------------------------------------|--------------------------|-------------------------------------------------------------------|-----------------------------------------------------|------------------------------------------------------|-------------------------------------|
| 1192            | 1        | California             | California_CV          | Lab/<br>Experimental             | O. tshawytscha                                                                    | Juvenile                 | Disease,<br>Genetics,<br>Temperature_<br>FW                       | Mortality                                           | Species_interactions,<br>Evolution*,<br>Environment, | Demography                          |
| 1193            | 1        | California             | California_N           | Field/<br>RemoteSensing          | O. kisutch                                                                        | Juvenile                 | Habitat,<br>Management,<br>Temperature_<br>FW                     | Habitat_Distribution                                | Environment, ,<br>Management                         | Dispersal                           |
| 1194            | NA       | Northwest              | Northwest_Co<br>astal  | Model,<br>Projections/<br>salmon | O. kisutch, O.<br>tshawytscha                                                     | Juvenile,<br>Population  | Flow,<br>Management                                               | Carryover, Life_history,<br>Mortality, Productivity | Environment, ,<br>Management                         | Demography                          |
| 1195            | NA       | Antarctica             | NA                     | Theoretical/<br>Opinion          | Other_species                                                                     | Marine                   | Acidity,<br>Density_Food                                          | Population_resilience                               | Species_interactions,<br>Environment,                | Demography                          |
| 1196            | 10plus   | Europe                 | NA                     | Field/<br>RemoteSensing          | S. salar                                                                          | Population               | Fisheries, Flow,<br>Temperature_<br>FW,<br>Temperature_<br>marine | Productivity                                        | Environment, ,<br>Management                         | Demography                          |
| 1197            | NA       | East_North_A<br>merica | NA                     | Model                            | S. salar                                                                          | Population               | Flow, Habitat,<br>Management                                      | Life_history, Mortality,<br>Productivity            | Environment, ,<br>Management                         | Demography                          |
| 1198            | NA       | Largescale             | NA                     | Review/<br>MetaAnalysis          | O. gorbuscha, O.<br>keta, O. kisutch,<br>O. nerka, O.<br>tshawytscha, S.<br>salar | General                  | Habitat                                                           | Genetics_Adaptation,<br>Habitat_Distribution        | Environment,                                         | Dispersal,<br>Evolution*            |
| 1199            | 10plus   | Northwest              | Northwest_Col<br>umbia | Field/<br>RemoteSensing          | General                                                                           | Freshwater_ha<br>bitat   | Environment,<br>Habitat                                           | NA                                                  | Environment,                                         | NA                                  |
| 1200            | NA       | NA                     | NA                     | Review/<br>MetaAnalysis          | General                                                                           | Marine                   | Acidity,<br>Contaminants,<br>Temperature_<br>marine               | NA                                                  | Environment,                                         | NA                                  |
| 1201            | 1        | Northwest              | Northwest_Col<br>umbia | Field/<br>RemoteSensing          | Other_fish                                                                        | Juvenile,<br>Upmigration | Contaminants                                                      | NA                                                  | Environment,                                         | NA                                  |
| 1202            | NA       | NA                     | NA                     | Theoretical/<br>Opinion          | Salmonid_<br>general                                                              | General,<br>Juvenile     | Density_Food,<br>Methods,<br>Temperature_<br>FW                   | Behaviour, Diet                                     | Species_interactions,<br>Environment,                | Species_interactio<br>ns, Dispersal |

| Citation number | Duration | Region     | Subregion                                        | Type of study                                       | Species                                                                                  | Life stage                | Driver                                     | Response                                       | Driver Process                        | Response Process                        |
|-----------------|----------|------------|--------------------------------------------------|-----------------------------------------------------|------------------------------------------------------------------------------------------|---------------------------|--------------------------------------------|------------------------------------------------|---------------------------------------|-----------------------------------------|
| 1203            | NA       | Europe     | NA                                               | Review/<br>MetaAnalysis                             | S. salar                                                                                 | Juvenile,<br>Outmigration | Environment                                | Physiology_Condition                           | Environment,                          | Physiology                              |
| 1204            | 1        | Europe     | NA                                               | Lab/<br>Experimental                                | S. salar                                                                                 | Juvenile,<br>Outmigration | Environment,<br>Temperature_<br>FW         | Physiology_Condition                           | Environment,                          | Physiology                              |
| 1205            | NA       | Northwest  | Northwest_Co<br>astal                            | Model                                               | O. keta, O.<br>kisutch, O.<br>mykiss, O.<br>tshawytscha                                  | Freshwater_ha<br>bitat    | Habitat,<br>Restoration                    | Productivity                                   | Environment, ,<br>Management          | Demography                              |
| 1206            | 1        | Northwest  | Northwest_Col<br>umbia                           | Field/<br>RemoteSensing                             | O. nerka                                                                                 | Upmigration               | Flow,<br>Management,<br>Temperature_<br>FW | Behaviour, Mortality,<br>Performance           | Environment, ,<br>Management          | Dispersal,<br>Demography,<br>Physiology |
| 1207            | NA       | Northwest  | Northwest_Col<br>umbia                           | Theoretical/<br>Opinion                             | O. tshawytscha                                                                           | Marine                    | Management,<br>Predators                   | Mortality                                      | Species_interactions,<br>, Management | Demography                              |
| 1208            | NA       | Northwest  | Northwest_Col<br>umbia                           | Review/<br>MetaAnalysis,<br>Theoretical/<br>Opinion | General, O.<br>kisutch, O.<br>mykiss, O.<br>tshawytscha,<br>Other_fish,<br>Other_species | Freshwater_ha<br>bitat    | Habitat,<br>Management                     | Population_resilience                          | Environment, ,<br>Management          | Demography                              |
| 1209            | NA       | Northwest  | Northwest_Col<br>umbia                           | Theoretical/<br>Opinion                             | Other_species                                                                            | Upmigration               | Management,<br>Predators                   | NA                                             | Species_interactions,<br>, Management | NA                                      |
| 1210            | 2to5     | Japan      | NA                                               | Field/<br>RemoteSensing                             | O. keta                                                                                  | Marine,<br>Upmigration    | Temperature_<br>FW                         | Behaviour, Maturation,<br>Physiology_Condition | Environment,                          | Dispersal,<br>Physiology                |
| 1211            | NA       | California | California_CV                                    | Model                                               | O. tshawytscha                                                                           | Outmigration              | Predators,<br>Temperature_<br>FW           | Behaviour, Mortality,<br>Phenology             | Species_interactions,<br>Environment, | Dispersal,<br>Demography                |
| 1212            | 10plus   | Alaska     | Alaska_S                                         | Field/<br>RemoteSensing                             | O. kisutch, O.<br>tshawytscha                                                            | Marine,<br>Population     | Predators                                  | Life_history, Mortality                        | Species_interactions,                 | Demography                              |
| 1213            | NA       | Northwest  | Northwest_Co<br>astal,<br>Northwest_Col<br>umbia | Review/<br>MetaAnalysis,<br>Theoretical/<br>Opinion | O. keta, O.<br>kisutch, O.<br>mykiss, O.<br>nerka, O.<br>tshawytscha                     | Population                | Environment,<br>Habitat,<br>Management     | Population_resilience                          | Environment, ,<br>Management          | Demography                              |
| 1214            | 2to5     | California | California_CV                                    | Field/<br>RemoteSensing                             | O. tshawytscha                                                                           | Outmigration              | Flow, Habitat                              | Mortality                                      | Environment,                          | Demography                              |

| Citation number | Duration | Region                   | Subregion                                               | Type of study                                        | Species                                     | Life stage                            | Driver                                                                          | Response                                                       | Driver Process               | Response Process                        |
|-----------------|----------|--------------------------|---------------------------------------------------------|------------------------------------------------------|---------------------------------------------|---------------------------------------|---------------------------------------------------------------------------------|----------------------------------------------------------------|------------------------------|-----------------------------------------|
| 1215            | NA       | NA                       | NA                                                      | Review/<br>MetaAnalysis                              | General                                     | General                               | Contaminants,<br>Flow,<br>Temperature_<br>FW                                    | NA                                                             | Environment,                 | NA                                      |
| 1216            | NA       | California,<br>Northwest | California_N,<br>California_S,<br>Northwest_Co<br>astal | Field/<br>RemoteSensing,<br>Projections/<br>physical | General                                     | Marine                                | Habitat                                                                         | NA                                                             | Environment,                 | NA                                      |
| 1217            | 1        | Europe                   | NA                                                      | Lab/<br>Experimental                                 | S. trutta                                   | Juvenile                              | Dissolved_oxyg<br>en,<br>Temperature_<br>FW                                     | Performance,<br>Physiology_Condition                           | Environment,                 | Physiology                              |
| 1218            | NA       | California               | California_N                                            | Model                                                | O. kisutch                                  | Freshwater_ha<br>bitat                | Flow, Habitat,<br>Management,<br>Methods,<br>Restoration,<br>Temperature_<br>FW | Habitat_Distribution,<br>Productivity                          | Environment, ,<br>Management | Dispersal,<br>Demography                |
| 1219            | NA       | California               | California_N                                            | Model                                                | O. kisutch, O.<br>mykiss, O.<br>tshawytscha | Freshwater_ha<br>bitat                | Flow, Habitat,<br>Restoration                                                   | Habitat_Distribution                                           | Environment, ,<br>Management | Dispersal                               |
| 1220            | NA       | California               | California_CV                                           | Model                                                | General                                     | Freshwater_ha<br>bitat                | Flow,<br>Management,<br>Methods,<br>Temperature_<br>FW                          | NA                                                             | Environment, ,<br>Management | NA                                      |
| 1221            | 2to5     | Europe                   | NA                                                      | Field/<br>RemoteSensing                              | General                                     | Freshwater_ha<br>bitat                | Habitat,<br>Restoration,<br>Temperature_<br>FW                                  | NA                                                             | Environment, ,<br>Management | NA                                      |
| 1222            | 2to5     | East_North_A<br>merica   | NA                                                      | Lab/<br>Experimental                                 | S. fontinalis                               | Juvenile                              | Temperature_<br>FW                                                              | Mortality,<br>Performance,<br>Physiology_Condition             | Environment,                 | Demography,<br>Physiology               |
| 1223            | 10plus   | Largescale               | NA                                                      | Field/<br>RemoteSensing                              | O. kisutch, O.<br>tshawytscha               | Marine                                | Fisheries,<br>Management                                                        | Mortality, Productivity                                        | , Management                 | Demography                              |
| 1224            | NA       | Europe                   | NA                                                      | Model,<br>Projections/<br>salmon                     | Other_fish, S.<br>salar                     | Juvenile,<br>Spawning,<br>Upmigration | Environment,<br>Flow                                                            | Habitat_Distribution,<br>Performance,<br>Population_resilience | Environment,                 | Dispersal,<br>Demography,<br>Physiology |

| Citation number | Duration | Region             | Subregion     | Type of study                  | Species                           | Life stage               | Driver                                                        | Response                                             | Driver Process                                  | Response Process                  |
|-----------------|----------|--------------------|---------------|--------------------------------|-----------------------------------|--------------------------|---------------------------------------------------------------|------------------------------------------------------|-------------------------------------------------|-----------------------------------|
| 1225            | 1        | California         | California_CV | Field/<br>RemoteSensing        | O. tshawytscha                    | Spawning,<br>Upmigration | Genetics                                                      | Phenology                                            | Evolution,                                      | Demography                        |
| 1226            | NA       | Largescale         | NA            | Field/<br>RemoteSensing        | O. gorbuscha, O. keta, O. kisutch | Spawning                 | Genetics                                                      | Phenology                                            | Evolution,                                      | Demography                        |
| 1227            | 1        | East_North_America | NA            | Field/<br>RemoteSensing        | S. fontinalis, S. salar           | Freshwater_habitat       | Habitat, Methods, Temperature_FW                              | Habitat_Distribution                                 | Environment,                                    | Dispersal                         |
| 1228            | 2to5     | East_North_America | NA            | Field/<br>RemoteSensing, Model | General                           | Freshwater_habitat       | Environment, Habitat, Methods, Temperature_FW                 | NA                                                   | Environment,                                    | NA                                |
| 1229            | 1        | East_North_America | NA            | Field/<br>RemoteSensing        | Other_fish, S. salar              | Juvenile                 | Predators                                                     | Habitat_Distribution                                 | Species_interactions,                           | Dispersal                         |
| 1230            | 1        | East_North_America | NA            | Field/<br>RemoteSensing        | S. salar                          | Upmigration              | Flow, Restoration, Temperature_FW                             | Behaviour, Habitat_Distribution                      | Environment, , Management                       | Dispersal                         |
| 1231            | NA       | Europe             | NA            | Field/<br>RemoteSensing        | S. salar                          | General                  | Methods                                                       | Growth                                               |                                                 | Physiology                        |
| 1232            | 2to5     | California         | California_N  | Field/<br>RemoteSensing        | O. kisutch                        | Juvenile                 | Dissolved_oxygen, Flow                                        | Mortality                                            | Environment,                                    | Demography                        |
| 1233            | 1        | Europe             | NA            | Lab/<br>Experimental           | O. mykiss                         | Egg                      | Environment, Genetics, Temperature_FW                         | Genetics_Adaptation, Mortality, Physiology_Condition | Evolution, Environment,                         | Demography, Evolution, Physiology |
| 1234            | 10plus   | Largescale         | NA            | Field/<br>RemoteSensing        | O. tshawytscha                    | Marine, Population       | Fisheries                                                     | Life_history, Maturation                             | , Management                                    | Demography, Physiology            |
| 1235            | 10plus   | Alaska, Largescale | Alaska_S      | Field/<br>RemoteSensing        | O. gorbuscha                      | Marine                   | Climate_indices, Density_Food, Management, Temperature_marine | Productivity                                         | Species_interactions, Environment, , Management | Demography                        |



| Citation number | Duration | Region           | Subregion                     | Type of study                           | Species                                       | Life stage         | Driver                                                     | Response                                          | Driver Process                                  | Response Process       |
|-----------------|----------|------------------|-------------------------------|-----------------------------------------|-----------------------------------------------|--------------------|------------------------------------------------------------|---------------------------------------------------|-------------------------------------------------|------------------------|
| 1236            | 10plus   | Northwest        | Northwest_Coastal             | Field/RemoteSensing, Projections/salmon | O. kisutch                                    | Juvenile           | Flow                                                       | Productivity                                      | Environment,                                    | Demography             |
| 1237            | 1        | Japan            | NA                            | Lab/Experimental                        | O. keta                                       | Outmigration       | Density_Food, Temperature_FW                               | Growth, Physiology_Condition                      | Species_interactions, Environment,              | Physiology             |
| 1238            | 1        | Japan            | NA                            | Lab/Experimental                        | O. mykiss                                     | Evolution          | Temperature_FW                                             | Performance, Physiology_Condition                 | Environment,                                    | Physiology             |
| 1239            | 2to5     | Northwest        | Northwest_Columbia            | Field/RemoteSensing, Model              | O. nerka, O. tshawytscha                      | Upmigration        | Habitat, Management, Methods                               | Behaviour, Habitat_Distribution                   | Environment, , Management                       | Dispersal              |
| 1240            | 10plus   | Alaska           | Alaska_S, Alaska_SE, Alaska_W | Field/RemoteSensing                     | O. keta, O. kisutch, O. nerka, O. tshawytscha | Marine, Population | Fisheries                                                  | Growth, Life_history, Maturation                  | , Management                                    | Demography, Physiology |
| 1241            | 10plus   | Alaska           | Alaska_S, Alaska_SE, Alaska_W | Field/RemoteSensing                     | O. gorbuscha                                  | Upmigration        | Genetics                                                   | Genetics_Adaptation, Phenology                    | Evolution,                                      | Demography, Evolution  |
| 1242            | NA       | British_Columbia | British_Columbia_not_Fraser   | Review/MetaAnalysis                     | General                                       | Marine             | Climate_indices, Ecosystem, Management, Temperature_marine | NA                                                | Species_interactions, Environment, , Management | NA                     |
| 1243            | 1        | Japan            | NA                            | Lab/Experimental                        | O. mykiss                                     | Juvenile           | Temperature_FW                                             | Genetics_Adaptation, Physiology_Condition         | Environment,                                    | Evolution, Physiology  |
| 1244            | 1        | California       | California_CV                 | Field/RemoteSensing, Model              | O. tshawytscha                                | Outmigration       | Flow, Habitat, Methods                                     | Habitat_Distribution                              | Environment,                                    | Dispersal              |
| 1245            | 10plus   | Europe           | NA                            | Field/RemoteSensing                     | S. salar                                      | Marine             | Temperature_marine                                         | Life_history, Maturation, Mortality, Productivity | Environment,                                    | Demography, Physiology |
| 1246            | 10plus   | Europe           | NA                            | Field/RemoteSensing                     | S. salar                                      | Marine, Population | Temperature_marine                                         | Productivity                                      | Environment,                                    | Demography             |
| 1247            | 2to5     | Alaska           | Alaska_W                      | Field/RemoteSensing                     | O. mykiss                                     | General            | Genetics                                                   | Genetics_Adaptation, Life_history                 | Evolution,                                      | Demography, Evolution  |
| 1248            | 1        | British_Columbia | British_Columbia_Fraser       | Lab/Experimental                        | O. mykiss                                     | Juvenile           | Temperature_FW                                             | Physiology_Condition                              | Environment,                                    | Physiology             |

| Citation number | Duration | Region                   | Subregion                                               | Type of study           | Species                  | Life stage                | Driver                                                    | Response                                                    | Driver Process                        | Response Process                        |
|-----------------|----------|--------------------------|---------------------------------------------------------|-------------------------|--------------------------|---------------------------|-----------------------------------------------------------|-------------------------------------------------------------|---------------------------------------|-----------------------------------------|
| 1249            | 1        | Europe                   | NA                                                      | Field/<br>RemoteSensing | O. mykiss                | Juvenile                  | Contaminants                                              | Physiology_Condition                                        | Environment,                          | Physiology                              |
| 1250            | 1        | Europe                   | NA                                                      | Lab/<br>Experimental    | S. salar                 | Juvenile                  | Density_Food,<br>Habitat                                  | Growth,<br>Habitat_Distribution                             | Species_interactions,<br>Environment, | Dispersal,<br>Physiology                |
| 1251            | 10plus   | California,<br>Northwest | California_N,<br>California_S,<br>Northwest_Co<br>astal | Field/<br>RemoteSensing | General                  | Marine                    | Acidity                                                   | NA                                                          | Environment,                          | NA                                      |
| 1252            | 2to5     | California               | California_N                                            | Field/<br>RemoteSensing | O. kisutch, O.<br>mykiss | Juvenile,<br>Outmigration | Dissolved_oxyg<br>en, Habitat                             | Behaviour, Growth,<br>Life_history,<br>Physiology_Condition | Environment,                          | Dispersal,<br>Demography,<br>Physiology |
| 1253            | 10plus   | Europe                   | NA                                                      | Field/<br>RemoteSensing | S. salar                 | Evolution,<br>Population  | Genetics,<br>Management                                   | Genetics_Adaptation                                         | Evolution, ,<br>Management            | Evolution                               |
| 1254            | 10plus   | Europe                   | NA                                                      | Field/<br>RemoteSensing | S. salar                 | Population                | Fisheries, Flow,<br>Management,<br>Temperature_<br>marine | Life_history,<br>Maturation, Mortality                      | Environment, ,<br>Management          | Demography,<br>Physiology               |
| 1255            | 10plus   | Europe                   | NA                                                      | Field/<br>RemoteSensing | S. salar                 | Population                | Flow,<br>Temperature_<br>marine                           | Maturation, Mortality                                       | Environment,                          | Demography,<br>Physiology               |
| 1256            | 10plus   | Europe                   | NA                                                      | Field/<br>RemoteSensing | S. salar                 | Juvenile,<br>Outmigration | Temperature_<br>FW,<br>Temperature_<br>marine             | Phenology                                                   | Environment,                          | Demography                              |
| 1257            | NA       | Largescale               | NA                                                      | Review/<br>MetaAnalysis | Other_fish               | Marine                    | Ecosystem,<br>Temperature_<br>marine                      | Habitat_Distribution,<br>Productivity                       | Species_interactions,<br>Environment, | Dispersal,<br>Demography                |
| 1258            | 1        | British_Colum<br>bia     | British_Colum<br>bia_not_Fraser                         | Lab/<br>Experimental    | O. gorbuscha             | Egg, Juvenile,<br>Marine  | Acidity                                                   | Growth,<br>Physiology_Condition                             | Environment,                          | Physiology                              |
| 1259            | 10plus   | NA                       | NA                                                      | Review/<br>MetaAnalysis | General                  | Freshwater_ha<br>bitat    | Habitat,<br>Temperature_<br>FW                            | NA                                                          | Environment,                          | NA                                      |
| 1260            | 10plus   | East_North_A<br>merica   | NA                                                      | Field/<br>RemoteSensing | Other_fish               | Upmigration               | Dissolved_oxyg<br>en, Methods,<br>Temperature_<br>FW      | Mortality                                                   | Environment,                          | Demography                              |

| Citation number | Duration | Region                         | Subregion                                                                                            | Type of study           | Species                      | Life stage            | Driver                                | Response                                           | Driver Process                        | Response Process          |
|-----------------|----------|--------------------------------|------------------------------------------------------------------------------------------------------|-------------------------|------------------------------|-----------------------|---------------------------------------|----------------------------------------------------|---------------------------------------|---------------------------|
| 1261            | NA       | NA                             | NA                                                                                                   | Theoretical/<br>Opinion | General                      | Population            | NA                                    | Population_resilience                              |                                       | Demography                |
| 1262            | 1        | British_Columbia,<br>Northwest | British_Columbia_Fraser,<br>British_Columbia_not_Fraser,<br>Northwest_Coastal,<br>Northwest_Columbia | Field/<br>RemoteSensing | General                      | Freshwater_habitat    | Temperature_FW                        | NA                                                 | Environment,                          | NA                        |
| 1263            | 2to5     | Europe                         | NA                                                                                                   | Field/<br>RemoteSensing | S. salar                     | Outmigration          | Habitat,<br>Management                | Behaviour, Mortality                               | Environment, ,<br>Management          | Dispersal,<br>Demography  |
| 1264            | NA       | Largescale                     | NA                                                                                                   | Review/<br>MetaAnalysis | O. kisutch, O. tshawytscha   | Marine                | Fisheries                             | Productivity                                       | , Management                          | Demography                |
| 1265            | 10plus   | British_Columbia               | British_Columbia_Fraser                                                                              | Field/<br>RemoteSensing | General,<br>Salmonid_general | Upmigration           | Flow,<br>Temperature_FW               | Mortality                                          | Environment,                          | Demography                |
| 1266            | 1        | Northwest                      | Northwest_Coastal                                                                                    | Lab/<br>Experimental    | O. mykiss                    | Egg, Juvenile         | Disease,<br>Temperature_FW            | Physiology_Condition                               | Species_interactions,<br>Environment, | Physiology                |
| 1267            | 1        | Asia_other                     | NA                                                                                                   | Lab/<br>Experimental    | O. mykiss                    | Juvenile              | Temperature_FW                        | Physiology_Condition                               | Environment,                          | Physiology                |
| 1268            | NA       | NA                             | NA                                                                                                   | Review/<br>MetaAnalysis | O. mykiss, S. salar          | Egg, Spawning         | Temperature_FW                        | Carryover,<br>Performance,<br>Physiology_Condition | Environment,                          | Demography,<br>Physiology |
| 1269            | NA       | NA                             | NA                                                                                                   | Review/<br>MetaAnalysis | General                      | Egg, Spawning         | Temperature_FW,<br>Temperature_marine | Productivity                                       | Environment,                          | Demography                |
| 1270            | NA       | NA                             | NA                                                                                                   | Review/<br>MetaAnalysis | General                      | Juvenile              | Ecosystem,<br>Flow                    | Habitat_Distribution                               | Species_interactions,<br>Environment, | Dispersal                 |
| 1271            | 10plus   | East_North_America             | NA                                                                                                   | Field/<br>RemoteSensing | S. salar                     | Marine,<br>Population | NA                                    | Life_history,<br>Maturation, Mortality             |                                       | Demography,<br>Physiology |
| 1272            | 10plus   | Europe                         | NA                                                                                                   | Field/<br>RemoteSensing | S. trutta                    | Juvenile              | Density_Food,<br>Temperature_FW       | Growth                                             | Species_interactions,<br>Environment, | Physiology                |
| 1273            | 10plus   | Europe                         | NA                                                                                                   | Field/<br>RemoteSensing | S. salar                     | Spawning              | Flow                                  | Behaviour                                          | Environment,                          | Dispersal                 |

| Citation number | Duration | Region                | Subregion                   | Type of study              | Species          | Life stage                   | Driver                                                     | Response                                          | Driver Process                                  | Response Process                  |
|-----------------|----------|-----------------------|-----------------------------|----------------------------|------------------|------------------------------|------------------------------------------------------------|---------------------------------------------------|-------------------------------------------------|-----------------------------------|
| 1274            | 1        | East_North_America    | NA                          | Lab/Experimental           | Other_species    | Marine                       | Acidity, Contaminants                                      | NA                                                | Environment,                                    | NA                                |
| 1275            | 1        | Europe                | NA                          | Lab/Experimental           | S. trutta        | Egg, Juvenile                | Temperature_FW                                             | Growth, Morphology                                | Environment,                                    | Physiology                        |
| 1276            | NA       | NA                    | NA                          | Theoretical/Opinion        | General          | General                      | Ecosystem                                                  | NA                                                | Species_interactions,                           | NA                                |
| 1277            | 1        | Northwest             | Northwest_Columbia          | Field/RemoteSensing        | O. mykiss        | Juvenile, Outmigration       | Predators                                                  | Behaviour, Mortality                              | Species_interactions,                           | Dispersal, Demography             |
| 1278            | NA       | NA                    | NA                          | Model                      | Salmonid_general | Population, Spawning         | Fisheries, Management, Methods                             | Population_resilience                             | , Management                                    | Demography                        |
| 1279            | 2to5     | California            | California_CV               | Field/RemoteSensing        | O. mykiss        | Evolution                    | Genetics, Temperature_FW                                   | Genetics_Adaptation, Life_history, Performance    | Evolution, Environment,                         | Demography, Evolution, Physiology |
| 1280            | NA       | Australia_New Zealand | NA                          | Review/MetaAnalysis        | Other_fish       | Marine                       | Ecosystem, Fisheries, Temperature_marine                   | Livelihood                                        | Species_interactions, Environment, , Management | Management                        |
| 1281            | 1        | Northwest             | Northwest_Coastal           | Field/RemoteSensing        | O. clarkii       | Freshwater_habitat, Juvenile | Flow, Habitat                                              | Behaviour, Habitat_Distribution                   | Environment,                                    | Dispersal                         |
| 1282            | NA       | Northwest             | Northwest_Coastal           | Model, Projections/salmon  | O. clarkii       | Juvenile, Population         | Environment, Flow, Management, Temperature_FW              | Life_history, Population_resilience, Productivity | Environment, , Management                       | Demography                        |
| 1283            | 6to10    | Northwest             | Northwest_Columbia          | Field/RemoteSensing, Model | O. tshawytscha   | Juvenile                     | Habitat, Temperature_FW                                    | Growth, Life_history                              | Environment,                                    | Demography, Physiology            |
| 1284            | 10plus   | British_Columbia      | British_Columbia_not_Fraser | Field/RemoteSensing, Model | General          | Marine                       | Climate_indices, Ecosystem, Management, Temperature_marine | NA                                                | Species_interactions, Environment, , Management | NA                                |

| Citation number | Duration | Region           | Subregion                   | Type of study              | Species                               | Life stage                                    | Driver                                                                          | Response                                   | Driver Process                     | Response Process       |
|-----------------|----------|------------------|-----------------------------|----------------------------|---------------------------------------|-----------------------------------------------|---------------------------------------------------------------------------------|--------------------------------------------|------------------------------------|------------------------|
| 1285            | 10plus   | British_Columbia | British_Columbia_not_Fraser | Field/RemoteSensing        | O. kisutch, O. tshawytscha            | Marine                                        | Climate_indices, Density_Food, Ecosystem, Environment, Prey, Temperature_marine | Mortality                                  | Species_interactions, Environment, | Demography             |
| 1286            | 6to10    | California       | California_CV               | Field/RemoteSensing        | O. tshawytscha                        | Juvenile, Outmigration                        | Flow                                                                            | Behaviour, Mortality                       | Environment,                       | Dispersal, Demography  |
| 1287            | 2to5     | Europe           | NA                          | Field/RemoteSensing        | S. salar                              | Juvenile, Outmigration                        | Flow                                                                            | Phenology, Physiology_Condition            | Environment,                       | Demography, Physiology |
| 1288            | 6to10    | Northwest        | Northwest_Coastal           | Field/RemoteSensing        | General                               | Marine                                        | Dissolved_oxygen                                                                | NA                                         | Environment,                       | NA                     |
| 1289            | 10plus   | Northwest        | Northwest_Columbia          | Field/RemoteSensing, Model | O. mykiss, O. tshawytscha             | Juvenile, Outmigration, Spawning, Upmigration | Flow, Management, Temperature_FW                                                | Mortality, Phenology                       | Environment, , Management          | Demography             |
| 1290            | 10plus   | California       | California_CV               | Field/RemoteSensing        | O. tshawytscha                        | Upmigration                                   | Flow, Management                                                                | Behaviour, Mortality                       | Environment, , Management          | Dispersal, Demography  |
| 1291            | 2to5     | California       | California_CV               | Field/RemoteSensing        | O. tshawytscha                        | Spawning                                      | Flow, Management, Temperature_FW                                                | Habitat_Distribution, Mortality, Phenology | Environment, , Management          | Dispersal, Demography  |
| 1292            | 10plus   | Northwest        | Northwest_Coastal           | Field/RemoteSensing        | O. kisutch, O. tshawytscha            | Marine                                        | Climate_indices, Environment, Temperature_marine                                | Mortality                                  | Environment,                       | Demography             |
| 1293            | 6to10    | Northwest        | Northwest_Coastal           | Field/RemoteSensing        | O. kisutch, O. tshawytscha            | Marine                                        | Density_Food, Environment, Habitat                                              | Habitat_Distribution, Phenology            | Species_interactions, Environment, | Dispersal, Demography  |
| 1294            | 10plus   | Largescale       | NA                          | Field/RemoteSensing        | General, Other_fish, Salmonid_general | Marine                                        | Fisheries, Management, Temperature_marine                                       | Productivity                               | Environment, , Management          | Demography             |

| Citation number | Duration | Region             | Subregion                   | Type of study              | Species                    | Life stage                      | Driver                                                | Response                                   | Driver Process                     | Response Process       |
|-----------------|----------|--------------------|-----------------------------|----------------------------|----------------------------|---------------------------------|-------------------------------------------------------|--------------------------------------------|------------------------------------|------------------------|
| 1295            | 10plus   | Northwest          | Northwest_Columbia          | Field/RemoteSensing        | O. mykiss, O. tshawytscha  | Marine, Outmigration            | Environment, Flow, Temperature_FW, Temperature_marine | Mortality                                  | Environment,                       | Demography             |
| 1296            | 2to5     | East_North_America | NA                          | Field/RemoteSensing        | S. fontinalis              | Juvenile                        | Density_Food, Temperature_FW                          | Growth                                     | Species_interactions, Environment, | Physiology             |
| 1297            | 2to5     | Northwest          | Northwest_Columbia          | Field/RemoteSensing        | O. kisutch, O. tshawytscha | Outmigration                    | Environment, Predators                                | Mortality                                  | Species_interactions, Environment, | Demography             |
| 1298            | 2to5     | California         | California_CV               | Field/RemoteSensing        | O. tshawytscha             | Juvenile                        | Habitat                                               | Behaviour, Habitat_Distribution, Mortality | Environment,                       | Dispersal, Demography  |
| 1299            | 1        | Europe             | NA                          | Field/RemoteSensing        | Other_fish                 | General, Upmigration            | Fisheries, Temperature_FW                             | Performance, Physiology_Condition          | Environment, , Management          | Physiology             |
| 1300            | NA       | NA                 | NA                          | Theoretical/Opinion        | General                    | Marine                          | Fisheries, Management, Methods                        | Population_resilience                      | , Management                       | Demography             |
| 1301            | 10plus   | Europe             | NA                          | Field/RemoteSensing, Model | S. salar                   | Evolution, Population           | Flow, Temperature_FW                                  | Growth, Life_history, Productivity         | Environment,                       | Demography, Physiology |
| 1302            | NA       | Europe             | NA                          | Model, Projections/salmon  | S. salar                   | Evolution, Population           | Flow, Management, Temperature_FW, Temperature_marine  | Genetics_Adaptation, Maturation            | Environment, , Management          | Evolution, Physiology  |
| 1303            | NA       | Europe             | NA                          | Model, Projections/salmon  | S. salar                   | Evolution, Marine, Population   | Fisheries, Temperature_marine                         | Life_history, Maturation, Productivity     | Environment, , Management          | Demography, Physiology |
| 1304            | 2to5     | British_Columbia   | British_Columbia_not_Fraser | Field/RemoteSensing        | General, Salmonid_general  | Freshwater_habitat, Upmigration | Flow, Habitat, Temperature_FW                         | NA                                         | Environment,                       | NA                     |

| Citation number | Duration | Region                          | Subregion                                                  | Type of study                                               | Species                       | Life stage               | Driver                                                  | Response                             | Driver Process                        | Response Process         |
|-----------------|----------|---------------------------------|------------------------------------------------------------|-------------------------------------------------------------|-------------------------------|--------------------------|---------------------------------------------------------|--------------------------------------|---------------------------------------|--------------------------|
| 1305            | NA       | Alaska                          | Alaska_S                                                   | Lab/<br>Experimental,<br>Model,<br>Projections/<br>physical | Salmonid_<br>general          | Freshwater_ha<br>bitat   | Environment,<br>Habitat,<br>Temperature_<br>FW          | Habitat_Distribution                 | Environment,                          | Dispersal                |
| 1306            | NA       | Alaska,<br>British_Colum<br>bia | Alaska_S,<br>Alaska_SE,<br>British_Colum<br>bia_not_Fraser | Review/<br>MetaAnalysis                                     | Salmonid_<br>general          | Freshwater_ha<br>bitat   | Environment,<br>Habitat                                 | Habitat_Distribution                 | Environment,                          | Dispersal                |
| 1307            | NA       | NA                              | NA                                                         | Review/<br>MetaAnalysis                                     | General                       | General                  | Dissolved_oxyg<br>en                                    | Physiology_Condition                 | Environment,                          | Physiology               |
| 1308            | NA       | Northwest                       | Northwest_Col<br>umbia                                     | Model                                                       | O. tshawytscha                | Juvenile,<br>Upmigration | Temperature_<br>FW                                      | Behaviour, Mortality,<br>Phenology   | Environment,                          | Dispersal,<br>Demography |
| 1309            | 1        | Europe                          | NA                                                         | Lab/<br>Experimental                                        | S. trutta                     | General                  | Contaminants                                            | Physiology_Condition                 | Environment,                          | Physiology               |
| 1310            | 1        | California                      | California_CV                                              | Lab/<br>Experimental                                        | O. tshawytscha                | Juvenile                 | Temperature_<br>FW                                      | Performance,<br>Physiology_Condition | Environment,                          | Physiology               |
| 1311            | NA       | Northwest                       | Northwest_Col<br>umbia                                     | Model                                                       | General                       | Freshwater_ha<br>bitat   | Flow, Habitat,<br>Management                            | NA                                   | Environment, ,<br>Management          | NA                       |
| 1312            | 2to5     | Northwest                       | Northwest_Co<br>astal                                      | Field/<br>RemoteSensing                                     | O. kisutch, O.<br>tshawytscha | Marine                   | Environment,<br>Habitat                                 | Habitat_Distribution                 | Environment,                          | Dispersal                |
| 1313            | 1        | California                      | California_CV                                              | Field/<br>RemoteSensing                                     | O. tshawytscha                | Juvenile                 | Flow, Habitat                                           | Habitat_Distribution                 | Environment,                          | Dispersal                |
| 1314            | NA       | Largescale                      | NA                                                         | Model                                                       | General                       | Marine                   | Ecosystem,<br>Environment,<br>Temperature_<br>marine    | NA                                   | Species_interactions,<br>Environment, | NA                       |
| 1315            | NA       | NA                              | NA                                                         | Review/<br>MetaAnalysis,<br>Theoretical/<br>Opinion         | General                       | Marine                   | Acidity,<br>Dissolved_oxyg<br>en,<br>Temperature_<br>FW | Performance,<br>Physiology_Condition | Environment,                          | Physiology               |
| 1316            | NA       | NA                              | NA                                                         | Review/<br>MetaAnalysis,<br>Theoretical/<br>Opinion         | General                       | Marine                   | Acidity,<br>Dissolved_oxyg<br>en,<br>Temperature_<br>FW | Performance,<br>Physiology_Condition | Environment,                          | Physiology               |

| Citation number | Duration | Region                   | Subregion                   | Type of study                                       | Species                   | Life stage               | Driver                                                      | Response                                                      | Driver Process                        | Response Process                       |
|-----------------|----------|--------------------------|-----------------------------|-----------------------------------------------------|---------------------------|--------------------------|-------------------------------------------------------------|---------------------------------------------------------------|---------------------------------------|----------------------------------------|
| 1317            | NA       | NA                       | NA                          | Theoretical/<br>Opinion                             | General                   | Marine                   | Acidity,<br>Dissolved_oxyg<br>en,<br>Temperature_<br>FW     | Performance,<br>Physiology_Condition                          | Environment,                          | Physiology                             |
| 1318            | 10plus   | California               | California_CV               | Field/<br>RemoteSensing                             | O. tshawytscha            | Juvenile,<br>Upmigration | Flow,<br>Management                                         | Mortality, Productivity                                       | Environment, ,<br>Management          | Demography                             |
| 1319            | NA       | California,<br>Northwest | NA                          | Projections/<br>physical                            | General                   | Marine                   | Acidity,<br>Dissolved_oxyg<br>en,<br>Temperature_<br>marine | NA                                                            | Environment,                          | NA                                     |
| 1320            | 1        | British_Colum<br>bia     | British_Columb<br>ia_Fraser | Lab/<br>Experimental                                | O. nerka                  | Upmigration              | Fisheries,<br>Temperature_<br>FW                            | Physiology_Condition                                          | Environment, ,<br>Management          | Physiology                             |
| 1321            | 1        | British_Colum<br>bia     | British_Columb<br>ia_Fraser | Field/<br>RemoteSensing                             | O. nerka                  | Spawning                 | Density_Food,<br>Temperature_<br>FW                         | Morphology,<br>Performance,<br>Physiology_Condition           | Species_interactions,<br>Environment, | Physiology                             |
| 1322            | 2to5     | Europe                   | NA                          | Lab/<br>Experimental                                | S. salar                  | Juvenile                 | Density_Food                                                | Behaviour,<br>Habitat_Distribution                            | Species_interactions,                 | Dispersal                              |
| 1323            | 6to10    | Europe                   | NA                          | Field/<br>RemoteSensing                             | S. salar, S. trutta       | Egg, Spawning            | Habitat,<br>Restoration                                     | Mortality                                                     | Environment, ,<br>Management          | Demography                             |
| 1324            | 6to10    | Europe                   | NA                          | Field/<br>RemoteSensing,<br>Model                   | S. salar                  | Outmigration             | Flow,<br>Methods,<br>Temperature_<br>FW                     | Phenology                                                     | Environment,                          | Demography                             |
| 1325            | 10plus   | Europe                   | NA                          | Lab/<br>Experimental                                | S. salar                  | Juvenile,<br>Upmigration | Disease                                                     | Genetics_Adaptation                                           | Species_interactions,                 | Evolution                              |
| 1326            | 10plus   | British_Colum<br>bia     | British_Columb<br>ia_Fraser | Field/<br>RemoteSensing                             | O. gorbuscha, O.<br>nerka | Marine                   | Environment                                                 | Behaviour                                                     | Environment,                          | Dispersal                              |
| 1327            | NA       | Northwest                | Northwest_Col<br>umbia      | Projections/<br>physical                            | General                   | Freshwater_ha<br>bitat   | Flow                                                        | NA                                                            | Environment,                          | NA                                     |
| 1328            | NA       | Largescale               | NA                          | Review/<br>MetaAnalysis,<br>Theoretical/<br>Opinion | Salmonid_<br>general      | Evolution,<br>General    | Habitat                                                     | Behaviour,<br>Genetics_Adaptation,<br>Life_history, Phenology | Environment,                          | Dispersal,<br>Demography,<br>Evolution |
| 1329            | 1        | Australia_New<br>Zealand | NA                          | Lab/<br>Experimental                                | O. tshawytscha            | Upmigration              | Genetics,<br>Habitat                                        | Behaviour,<br>Genetics_Adaptation,<br>Phenology               | Evolution,<br>Environment,            | Dispersal,<br>Demography,<br>Evolution |



| Citation number | Duration | Region                   | Subregion                      | Type of study           | Species                                     | Life stage                                       | Driver                                                              | Response                           | Driver Process                        | Response Process          |
|-----------------|----------|--------------------------|--------------------------------|-------------------------|---------------------------------------------|--------------------------------------------------|---------------------------------------------------------------------|------------------------------------|---------------------------------------|---------------------------|
| 1330            | NA       | California               | California_CV                  | Review/<br>MetaAnalysis | O. tshawytscha                              | General                                          | Flow, Habitat,<br>Management,<br>Temperature_<br>FW                 | Population_resilience              | Environment, ,<br>Management          | Demography                |
| 1331            | 10plus   | California               | California_N                   | Field/<br>RemoteSensing | O. kisutch, O.<br>tshawytscha               | Population                                       | Climate_indice<br>s,<br>Environment,<br>Flow,<br>Temperature_<br>FW | Productivity                       | Environment,                          | Demography                |
| 1332            | NA       | California               | California_CV,<br>California_N | Theoretical/<br>Opinion | O. kisutch, O.<br>mykiss, O.<br>tshawytscha | Freshwater_ha<br>bitat, Juvenile,<br>Upmigration | Habitat,<br>Management                                              | Population_resilience              | Environment, ,<br>Management          | Demography                |
| 1333            | 1        | East_North_A<br>merica   | NA                             | Lab/<br>Experimental    | O. tshawytscha,<br>S. salar                 | Juvenile                                         | Methods,<br>Temperature_<br>FW                                      | Physiology_Condition               | Environment,                          | Physiology                |
| 1334            | 1        | British_Colum<br>bia     | British_Columb<br>ia_Fraser    | Lab/<br>Experimental    | O. gorbuscha, O.<br>keta                    | Spawning,<br>Upmigration                         | Fisheries                                                           | Mortality,<br>Physiology_Condition | , Management                          | Demography,<br>Physiology |
| 1335            | 1        | Alaska, Russia           | Alaska_W                       | Field/<br>RemoteSensing | O. gorbuscha, O.<br>keta                    | Marine                                           | Density_Food,<br>Ecosystem,<br>Environment                          | Productivity                       | Species_interactions,<br>Environment, | Demography                |
| 1336            | 1        | Australia_New<br>Zealand | NA                             | Field/<br>RemoteSensing | Other_fish                                  | Marine                                           | Acidity                                                             | Performance                        | Environment,                          | Physiology                |
| 1337            | NA       | NA                       | NA                             | Theoretical/<br>Opinion | General                                     | General                                          | Invasives                                                           | Population_resilience              | Species_interactions,                 | Demography                |
| 1338            | NA       | NA                       | NA                             | Model                   | Salmonid_<br>general                        | Egg, Juvenile,<br>Spawning                       | Density_Food,<br>Flow, Habitat,<br>Methods,<br>Temperature_<br>FW   | Habitat_Distribution               | Species_interactions,<br>Environment, | Dispersal                 |
| 1339            | NA       | NA                       | NA                             | Review/<br>MetaAnalysis | Other_species                               | Marine                                           | Ecosystem,<br>Methods                                               | NA                                 | Species_interactions,                 | NA                        |
| 1340            | 10plus   | California               | California_N                   | Field/<br>RemoteSensing | Other_fish                                  | Marine                                           | Climate_indice<br>s, Ecosystem                                      | Productivity                       | Species_interactions,<br>Environment, | Demography                |

| Citation number | Duration | Region                                          | Subregion                                                                           | Type of study                                      | Species                                                      | Life stage                     | Driver                           | Response                                   | Driver Process                                | Response Process       |
|-----------------|----------|-------------------------------------------------|-------------------------------------------------------------------------------------|----------------------------------------------------|--------------------------------------------------------------|--------------------------------|----------------------------------|--------------------------------------------|-----------------------------------------------|------------------------|
| 1341            | NA       | Alaska, British_Columbia, Largescale, Northwest | Alaska_S, Alaska_SE, Alaska_W, British_Columbia_Fraser, British_Columbia_not_Fraser | Review/<br>MetaAnalysis                            | O. nerka                                                     | Marine, Population             | Fisheries, Habitat, Management   | Population_resilience, Productivity        | Environment, , Management                     | Demography             |
| 1342            | NA       | NA                                              | NA                                                                                  | Projections/<br>ecosystem, Review/<br>MetaAnalysis | General                                                      | General                        | Ecosystem, Methods               | NA                                         | Species_interactions, NA                      |                        |
| 1343            | 2to5     | California                                      | California_N                                                                        | Lab/<br>Experimental                               | O. tshawytscha                                               | Juvenile, Upmigration          | Disease, Temperature_FW          | NA                                         | Species_interactions, Environment, NA         |                        |
| 1344            | 1        | California                                      | California_N                                                                        | Lab/<br>Experimental                               | O. tshawytscha                                               | Juvenile                       | Disease                          | Mortality                                  | Species_interactions, Demography              |                        |
| 1345            | 2to5     | California                                      | California_N                                                                        | Field/<br>RemoteSensing, Lab/<br>Experimental      | O. kisutch, O. tshawytscha                                   | Juvenile, Upmigration          | Disease, Temperature_FW          | Mortality                                  | Species_interactions, Demography Environment, |                        |
| 1346            | 2to5     | California                                      | California_N                                                                        | Field/<br>RemoteSensing                            | O. kisutch, O. tshawytscha                                   | Juvenile, Upmigration          | Disease, Flow, Temperature_FW    | Mortality                                  | Species_interactions, Demography Environment, |                        |
| 1347            | NA       | Northwest                                       | NA                                                                                  | Review/<br>MetaAnalysis                            | General                                                      | Freshwater_habitat             | Flow, Management, Temperature_FW | Genetics_Adaptation, Population_resilience | Environment, , Management                     | Demography, Evolution* |
| 1348            | 2to5     | British_Columbia                                | British_Columbia_Fraser                                                             | Field/<br>RemoteSensing                            | O. nerka                                                     | Juvenile, Marine, Outmigration | Habitat                          | Behaviour, Mortality                       | Environment,                                  | Dispersal, Demography  |
| 1349            | 1        | Mountain_west                                   | NA                                                                                  | Lab/<br>Experimental                               | General, O. clarkii, O. mykiss, Other_fish, Salmonid_general | General                        | Temperature_FW                   | Morphology, Performance                    | Environment,                                  | Physiology             |

| Citation number | Duration | Region             | Subregion                   | Type of study                         | Species          | Life stage                   | Driver                                | Response                                | Driver Process                     | Response Process                  |
|-----------------|----------|--------------------|-----------------------------|---------------------------------------|------------------|------------------------------|---------------------------------------|-----------------------------------------|------------------------------------|-----------------------------------|
| 1350            | NA       | British_Columbia   | British_Columbia_Fraser     | Projections/salmon                    | O. nerka         | Evolution                    | Genetics, Temperature_FW              | Genetics_Adaptation, Phenology          | Evolution, Environment,            | Demography, Evolution             |
| 1351            | 10plus   | Alaska             | Alaska_S                    | Field/RemoteSensing                   | O. nerka         | Juvenile, Outmigration       | Habitat, Management, Temperature_FW   | Growth, Mortality, Phenology            | Environment, , Management          | Demography, Physiology            |
| 1352            | 10plus   | Europe             | NA                          | Field/RemoteSensing                   | S. salar         | Evolution, Marine            | Genetics                              | Genetics_Adaptation, Growth, Maturation | Evolution,                         | Evolution, Physiology             |
| 1353            | NA       | NA                 | NA                          | Model                                 | General          | Population                   | NA                                    | Life_history, Population_resilience     |                                    | Demography                        |
| 1354            | NA       | Northwest          | Northwest_Columbia          | Field/RemoteSensing, Model            | O. tshawytscha   | Juvenile, Spawning           | Density_Food, Habitat, Temperature_FW | Growth, Habitat_Distribution, Phenology | Species_interactions, Environment, | Dispersal, Demography, Physiology |
| 1355            | 1        | NA                 | NA                          | Lab/Experimental                      | O. tshawytscha   | Egg                          | Temperature_FW                        | Physiology_Condition                    | Environment,                       | Physiology                        |
| 1356            | 1        | Northwest          | Northwest_Coastal           | Field/RemoteSensing                   | O. mykiss        | Juvenile                     | Habitat                               | Behaviour, Habitat_Distribution         | Environment,                       | Dispersal                         |
| 1357            | 2to5     | East_North_America | NA                          | Field/RemoteSensing, Lab/Experimental | S. salar         | Outmigration                 | Temperature_FW                        | Mortality, Physiology_Condition         | Environment,                       | Demography, Physiology            |
| 1358            | 10plus   | British_Columbia   | British_Columbia_not_Fraser | Field/RemoteSensing, Model            | Salmonid_general | Freshwater_habitat           | Habitat, Restoration                  | NA                                      | Environment, , Management          | NA                                |
| 1359            | 10plus   | British_Columbia   | British_Columbia_not_Fraser | Field/RemoteSensing                   | O. kisutch       | Freshwater_habitat, Juvenile | Habitat, Management                   | Habitat_Distribution, Productivity      | Environment, , Management          | Dispersal, Demography             |
| 1360            | 1        | Europe             | NA                          | Field/RemoteSensing                   | S. salar         | Outmigration                 | Habitat, Management                   | Behaviour                               | Environment, , Management          | Dispersal                         |
| 1361            | 1        | Europe             | NA                          | Field/RemoteSensing                   | S. salar         | Outmigration                 | Habitat, Management                   | Behaviour                               | Environment, , Management          | Dispersal                         |
| 1362            | 10plus   | British_Columbia   | British_Columbia_Fraser     | Field/RemoteSensing                   | O. nerka         | Marine                       | Environment                           | Mortality                               | Environment,                       | Demography                        |
| 1363            | NA       | Northwest          | Northwest_Coastal           | Model                                 | O. tshawytscha   | Marine                       | Acidity                               | Productivity                            | Environment,                       | Demography                        |

| Citation number | Duration | Region                        | Subregion                   | Type of study             | Species                       | Life stage               | Driver                                                                                         | Response                             | Driver Process                                        | Response Process         |
|-----------------|----------|-------------------------------|-----------------------------|---------------------------|-------------------------------|--------------------------|------------------------------------------------------------------------------------------------|--------------------------------------|-------------------------------------------------------|--------------------------|
| 1364            | NA       | Alaska                        | Alaska_W                    | Projections/<br>ecosystem | General                       | Marine                   | Ecosystem,<br>Environment,<br>Prey                                                             | NA                                   | Species_interactions,<br>Environment,                 | NA                       |
| 1365            | NA       | Alaska                        | Alaska_W                    | Model                     | General,<br>Other_species     | Marine                   | Ecosystem,<br>Predators                                                                        | NA                                   | Species_interactions,                                 | NA                       |
| 1366            | 1        | California                    | California_CV               | Lab/<br>Experimental      | O. mykiss                     | Juvenile                 | Contaminants                                                                                   | Performance,<br>Physiology_Condition | Environment,                                          | Physiology               |
| 1367            | 1        | Europe                        | NA                          | Lab/<br>Experimental      | Other_fish                    | General                  | NA                                                                                             | Immune,<br>Physiology_Condition      |                                                       | Physiology               |
| 1368            | 1        | East_North_America            | NA                          | Field/<br>RemoteSensing   | S. salar                      | Upmigration              | Fisheries, Flow                                                                                | Behaviour                            | Environment, ,<br>Management                          | Dispersal                |
| 1369            | 1        | East_North_America            | NA                          | Field/<br>RemoteSensing   | S. salar                      | Spawning,<br>Upmigration | Fisheries                                                                                      | Behaviour,<br>Performance            | , Management                                          | Dispersal,<br>Physiology |
| 1370            | 10plus   | Northwest                     | Northwest_Columbia          | Field/<br>RemoteSensing   | General                       | Juvenile                 | Density_Food,<br>Prey,<br>Temperature_<br>FW                                                   | NA                                   | Species_interactions,<br>Environment,                 | NA                       |
| 1371            | NA       | NA                            | NA                          | Review/<br>MetaAnalysis   | Other_species                 | Marine                   | Acidity,<br>Ecosystem,<br>Fisheries                                                            | NA                                   | Species_interactions,<br>Environment, ,<br>Management | NA                       |
| 1372            | 10plus   | East_North_America,<br>Europe | NA                          | Field/<br>RemoteSensing   | Other_species                 | Marine                   | Acidity,<br>Ecosystem                                                                          | NA                                   | Species_interactions,<br>Environment,                 | NA                       |
| 1373            | 10plus   | British_Columbia              | British_Columbia_not_Fraser | Review/<br>MetaAnalysis   | General                       | Marine                   | Dissolved_oxygen,<br>Environment,<br>Habitat,<br>Temperature_<br>FW,<br>Temperature_<br>marine | NA                                   | Environment,                                          | NA                       |
| 1374            | 2to5     | Mountain_west                 | NA                          | Field/<br>RemoteSensing   | S. trutta                     | Freshwater_habitat       | Restoration                                                                                    | Habitat_Distribution                 | , Management                                          | Dispersal                |
| 1375            | 10plus   | Largescale                    | NA                          | Field/<br>RemoteSensing   | O. kisutch, O.<br>tshawytscha | Marine                   | Fisheries                                                                                      | Livelihood                           | , Management                                          | Management               |
| 1376            | 1        | Europe                        | NA                          | Field/<br>RemoteSensing   | S. trutta                     | Egg, Spawning            | Habitat                                                                                        | Behaviour,<br>Habitat_Distribution   | Environment,                                          | Dispersal                |

| Citation number | Duration | Region                     | Subregion          | Type of study                             | Species                             | Life stage                  | Driver                                  | Response                                    | Driver Process                                  | Response Process       |
|-----------------|----------|----------------------------|--------------------|-------------------------------------------|-------------------------------------|-----------------------------|-----------------------------------------|---------------------------------------------|-------------------------------------------------|------------------------|
| 1377            | 6to10    | East_North_America, Europe | NA                 | Field/RemoteSensing                       | S. salar                            | Marine                      | Habitat                                 | Behaviour, Habitat_Distribution             | Environment,                                    | Dispersal              |
| 1378            | 6to10    | Europe                     | NA                 | Field/RemoteSensing                       | S. salar                            | Outmigration                | Environment                             | Behaviour, Phenology                        | Environment,                                    | Dispersal, Demography  |
| 1379            | 1        | Mountain_west              | NA                 | Field/RemoteSensing                       | O. mykiss, S. fontinalis, S. trutta | Juvenile                    | Flow, Habitat, Temperature_FW           | Behaviour, Habitat_Distribution             | Environment,                                    | Dispersal              |
| 1380            | NA       | Africa                     | NA                 | Projections/salmon                        | O. mykiss                           | Freshwater_habitat, General | Temperature_FW                          | Habitat_Distribution                        | Environment,                                    | Dispersal              |
| 1381            | NA       | Mountain_west              | NA                 | Projections/salmon                        | O. clarkii                          | Population                  | Habitat, Temperature_FW                 | Habitat_Distribution, Population_resilience | Environment,                                    | Dispersal, Demography  |
| 1382            | 2to5     | Mountain_west              | NA                 | Field/RemoteSensing, Projections/physical | General                             | Freshwater_habitat          | Temperature_FW                          | NA                                          | Environment,                                    | NA                     |
| 1383            | 10plus   | California                 | California_N       | Field/RemoteSensing                       | O. tshawytscha                      | Juvenile, Upmigration       | Disease, Management                     | Mortality                                   | Species_interactions, , Management              | Demography             |
| 1384            | 6to10    | East_North_America         | NA                 | Field/RemoteSensing                       | S. fontinalis                       | Juvenile                    | Temperature_FW                          | Growth, Mortality                           | Environment,                                    | Demography, Physiology |
| 1385            | NA       | Largescale                 | NA                 | Model                                     | General, Other_species              | Marine                      | Ecosystem, Fisheries                    | NA                                          | Species_interactions, , Management              | NA                     |
| 1386            | 1        | California                 | California_CV      | Lab/Experimental                          | O. tshawytscha                      | Juvenile                    | Methods, Temperature_FW                 | Growth                                      | Environment,                                    | Physiology             |
| 1387            | NA       | Europe                     | NA                 | Model                                     | General                             | Freshwater_habitat          | Ecosystem, Habitat, Management, Methods | Habitat_Distribution                        | Species_interactions, Environment, , Management | Dispersal              |
| 1388            | 6to10    | Northwest                  | Northwest_Columbia | Field/RemoteSensing                       | O. tshawytscha                      | Juvenile, Outmigration      | Density_Food, Temperature_FW            | Phenology, Physiology_Condition             | Species_interactions, Environment,              | Demography, Physiology |
| 1389            | 2to5     | Northwest                  | Northwest_Columbia | Field/RemoteSensing                       | O. keta, O. kisutch, O. tshawytscha | Outmigration                | Flow, Habitat, Methods                  | Habitat_Distribution                        | Environment,                                    | Dispersal              |

| Citation number | Duration | Region             | Subregion                   | Type of study                             | Species                   | Life stage                      | Driver                                      | Response                        | Driver Process                                  | Response Process      |
|-----------------|----------|--------------------|-----------------------------|-------------------------------------------|---------------------------|---------------------------------|---------------------------------------------|---------------------------------|-------------------------------------------------|-----------------------|
| 1390            | 2to5     | Northwest          | Northwest_Columbia          | Field/RemoteSensing                       | General                   | Outmigration                    | Dissolved_oxygen, Environment               | NA                              | Environment,                                    | NA                    |
| 1391            | 10plus   | California         | California_S                | Field/RemoteSensing, Projections/physical | General, Salmonid_general | Freshwater_habitat              | Flow, Habitat, Management                   | NA                              | Environment, , Management                       | NA                    |
| 1392            | 10plus   | Alaska             | Alaska_S, Alaska_W          | Field/RemoteSensing                       | O. nerka                  | Population                      | Climate_indices, Habitat                    | Productivity                    | Environment,                                    | Demography            |
| 1393            | 6to10    | British_Columbia   | British_Columbia_not_Fraser | Field/RemoteSensing, Model                | S. salar                  | Marine                          | Disease, Management, Temperature_FW         | Population_resilience           | Species_interactions, Environment, , Management | Demography            |
| 1394            | 1        | South_America      | NA                          | Lab/Experimental                          | S. salar                  | Egg                             | Temperature_FW                              | Morphology, Performance         | Environment,                                    | Physiology            |
| 1395            | 2to5     | East_North_America | NA                          | Field/RemoteSensing                       | O. mykiss                 | Juvenile                        | Dissolved_oxygen, Invasives, Temperature_FW | Habitat_Distribution            | Species_interactions, Environment,              | Dispersal             |
| 1396            | NA       | NA                 | NA                          | Model                                     | Salmonid_general          | Egg, Freshwater_habitat         | Management, Methods, Restoration            | NA                              | , Management                                    | NA                    |
| 1397            | 1        | British_Columbia   | British_Columbia_Fraser     | Field/RemoteSensing                       | O. nerka                  | Upmigration                     | Habitat, Temperature_FW                     | Behaviour, Physiology_Condition | Environment,                                    | Dispersal, Physiology |
| 1398            | 2to5     | Northwest          | Northwest_Columbia          | Field/RemoteSensing                       | Other_species             | Juvenile                        | Environment, Habitat, Management            | NA                              | Environment, , Management                       | NA                    |
| 1399            | NA       | NA                 | NA                          | Review/MetaAnalysis                       | General                   | Freshwater_habitat, Upmigration | Flow, Management                            | NA                              | Environment, , Management                       | NA                    |
| 1400            | NA       | British_Columbia   | NA                          | Model                                     | General                   | Juvenile                        | Habitat, Management, Methods                | Habitat_Distribution            | Environment, , Management                       | Dispersal             |
| 1401            | 10plus   | British_Columbia   | British_Columbia_Fraser     | Field/RemoteSensing                       | O. nerka                  | Marine                          | Density_Food, Ecosystem                     | Productivity                    | Species_interactions,                           | Demography            |

| Citation number | Duration | Region                        | Subregion               | Type of study                                         | Species                             | Life stage   | Driver                                         | Response                                                             | Driver Process                        | Response Process                        |
|-----------------|----------|-------------------------------|-------------------------|-------------------------------------------------------|-------------------------------------|--------------|------------------------------------------------|----------------------------------------------------------------------|---------------------------------------|-----------------------------------------|
| 1402            | NA       | British_Columbia              | British_Columbia_Fraser | Theoretical/<br>Opinion                               | O. nerka                            | General      | Contaminants                                   | Behaviour,<br>Life_history,<br>Physiology_Condition,<br>Productivity | Environment,                          | Dispersal,<br>Demography,<br>Physiology |
| 1403            | 1        | California                    | California_N            | Field/<br>RemoteSensing                               | O. mykiss                           | Juvenile     | Density_Food,<br>Flow, Prey                    | Behaviour,<br>Habitat_Distribution                                   | Species_interactions,<br>Environment, | Dispersal                               |
| 1404            | 1        | Europe                        | NA                      | Field/<br>RemoteSensing                               | Other_species                       | Marine       | Acidity,<br>Density_Food,<br>Prey              | NA                                                                   | Species_interactions,<br>Environment, | NA                                      |
| 1405            | NA       | East_North_America,<br>Europe | NA                      | Field/<br>RemoteSensing                               | S. salar                            | Population   | Genetics,<br>Habitat                           | Genetics_Adaptation                                                  | Evolution,<br>Environment,            | Evolution                               |
| 1406            | 1        | East_North_America            | NA                      | Field/<br>RemoteSensing                               | S. salar                            | Juvenile     | Flow,<br>Temperature_<br>FW                    | Behaviour                                                            | Environment,                          | Dispersal                               |
| 1407            | 1        | East_North_America            | NA                      | Field/<br>RemoteSensing                               | S. salar                            | Juvenile     | Flow, Habitat,<br>Temperature_<br>FW           | Behaviour,<br>Habitat_Distribution                                   | Environment,                          | Dispersal                               |
| 1408            | 1        | Europe                        | NA                      | Lab/<br>Experimental                                  | O. mykiss                           | Juvenile     | Dissolved_oxygen,<br>Temperature_<br>FW        | Growth                                                               | Environment,                          | Physiology                              |
| 1409            | 2to5     | Northwest                     | Northwest_Columbia      | Field/<br>RemoteSensing                               | O. tshawytscha                      | Upmigration  | Methods,<br>Predators                          | Mortality                                                            | Species_interactions,                 | Demography                              |
| 1410            | 2to5     | Northwest                     | Northwest_Columbia      | Field/<br>RemoteSensing                               | O. tshawytscha                      | Outmigration | Methods,<br>Temperature_<br>FW                 | Mortality                                                            | Environment,                          | Demography                              |
| 1411            | 6to10    | Northwest                     | Northwest_Columbia      | Field/<br>RemoteSensing                               | O. tshawytscha                      | Upmigration  | Predators                                      | Mortality                                                            | Species_interactions,                 | Demography                              |
| 1412            | NA       | Northwest                     | Northwest_Columbia      | Projections/<br>ecosystem,<br>Review/<br>MetaAnalysis | Other_fish,<br>Salmonid_<br>general | Juvenile     | Invasives,<br>Predators                        | Habitat_Distribution                                                 | Species_interactions,                 | Dispersal                               |
| 1413            | 6to10    | Northwest                     | Northwest_Columbia      | Field/<br>RemoteSensing                               | O. tshawytscha,<br>Other_fish       | Juvenile     | Invasives,<br>Predators,<br>Temperature_<br>FW | Mortality                                                            | Species_interactions,<br>Environment, | Demography                              |
| 1414            | 10plus   | Northwest                     | Northwest_Puget_Sound   | Field/<br>RemoteSensing                               | O. keta                             | Upmigration  | Flow,<br>Management                            | Phenology                                                            | Environment, ,<br>Management          | Demography                              |

| Citation number | Duration | Region                           | Subregion                                                                     | Type of study           | Species                            | Life stage          | Driver                                                                     | Response                                                        | Driver Process                        | Response Process                    |
|-----------------|----------|----------------------------------|-------------------------------------------------------------------------------|-------------------------|------------------------------------|---------------------|----------------------------------------------------------------------------|-----------------------------------------------------------------|---------------------------------------|-------------------------------------|
| 1415            | 1        | Europe                           | NA                                                                            | Field/<br>RemoteSensing | S. trutta                          | General             | Disease,<br>Temperature_<br>FW                                             | NA                                                              | Species_interactions,<br>Environment, | NA                                  |
| 1416            | 2to5     | Alaska                           | Alaska_W                                                                      | Field/<br>RemoteSensing | O. mykiss, O.<br>nerka             | Spawning            | Density_Food,<br>Habitat,<br>Temperature_<br>FW                            | Behaviour, Diet                                                 | Species_interactions,<br>Environment, | Species_interactio<br>ns, Dispersal |
| 1417            | 10plus   | British_Colum<br>bia, Largescale | British_Columb<br>ia_not_Fraser                                               | Field/<br>RemoteSensing | O. gorbuscha, O.<br>tshawytscha    | Marine              | Predators                                                                  | NA                                                              | Species_interactions,                 | NA                                  |
| 1418            | 10plus   | Alaska,<br>British_Colum<br>bia  | Alaska_SE,<br>British_Columb<br>ia_Fraser,<br>British_Columb<br>ia_not_Fraser | Field/<br>RemoteSensing | O. gorbuscha, O.<br>nerka          | Marine              | Density_Food                                                               | Maturation,<br>Productivity                                     | Species_interactions,                 | Demography,<br>Physiology           |
| 1419            | 10plus   | Largescale                       | NA                                                                            | Field/<br>RemoteSensing | O. gorbuscha, O.<br>keta, O. nerka | Marine              | Density_Food                                                               | Productivity                                                    | Species_interactions,                 | Demography                          |
| 1420            | 2to5     | California                       | California_S                                                                  | Field/<br>RemoteSensing | O. mykiss                          | Juvenile            | Density_Food,<br>Habitat,<br>Temperature_<br>FW                            | Habitat_Distribution                                            | Species_interactions,<br>Environment, | Dispersal                           |
| 1421            | 10plus   | Northwest                        | Northwest_Co<br>astal                                                         | Field/<br>RemoteSensing | O. kisutch                         | Marine              | Climate_indice<br>s,<br>Temperature_<br>marine                             | Productivity                                                    | Environment,                          | Demography                          |
| 1422            | 10plus   | Europe                           | NA                                                                            | Field/<br>RemoteSensing | S. salar                           | Juvenile,<br>Marine | Climate_indice<br>s,<br>Contaminants,<br>Management,<br>Temperature_<br>FW | Carryover, Life_history,<br>Maturation, Mortality,<br>Phenology | Environment, ,<br>Management          | Demography,<br>Physiology           |
| 1423            | 10plus   | Northwest                        | Northwest_Col<br>umbia                                                        | Field/<br>RemoteSensing | O. kisutch, O.<br>tshawytscha      | Marine              | Density_Food,<br>Ecosystem                                                 | Mortality                                                       | Species_interactions,                 | Demography                          |



| Citation number | Duration | Region                | Subregion                                     | Type of study               | Species                            | Life stage         | Driver                                                         | Response              | Driver Process                     | Response Process       |
|-----------------|----------|-----------------------|-----------------------------------------------|-----------------------------|------------------------------------|--------------------|----------------------------------------------------------------|-----------------------|------------------------------------|------------------------|
| 1424            | 10plus   | Northwest             | Northwest_Coastal                             | Field/RemoteSensing, Model  | General, O. kisutch                | Marine             | Density_Food, Ecosystem, Environment, Prey, Temperature_marine | Productivity          | Species_interactions, Environment, | Demography             |
| 1425            | 6to10    | Northwest             | Northwest_Coastal                             | Field/RemoteSensing, Model  | General, Other_fish, Other_species | Marine             | Density_Food, Ecosystem, Prey, Temperature_marine              | Productivity          | Species_interactions, Environment, | Demography             |
| 1426            | 2to5     | Europe                | NA                                            | Field/RemoteSensing         | Salmonid_general                   | Freshwater_habitat | Habitat, Management, Temperature_FW                            | NA                    | Environment, , Management          | NA                     |
| 1427            | NA       | California, Northwest | California_N, California_S, Northwest_Coastal | Model, Projections/physical | General                            | Marine             | Ecosystem, Environment                                         | Productivity          | Species_interactions, Environment, | Demography             |
| 1428            | 2to5     | East_North_America    | NA                                            | Field/RemoteSensing, Model  | S. salar                           | Freshwater_habitat | Flow, Habitat, Methods, Temperature_FW                         | NA                    | Environment,                       | NA                     |
| 1429            | 10plus   | California            | California_CV                                 | Field/RemoteSensing         | O. tshawytscha                     | Marine             | Density_Food, Ecosystem, Environment, Prey, Temperature_marine | Growth, Mortality     | Species_interactions, Environment, | Demography, Physiology |
| 1430            | 10plus   | California, Northwest | California_N, California_S, Northwest_Coastal | Field/RemoteSensing         | O. tshawytscha                     | Marine             | Density_Food, Ecosystem, Environment, Prey, Temperature_marine | Growth, Performance   | Species_interactions, Environment, | Physiology             |
| 1431            | NA       | Northwest             | Northwest_Puget_Sound                         | Theoretical/Opinion         | Salmonid_general                   | Freshwater_habitat | Flow, Management                                               | Population_resilience | Environment, , Management          | Demography             |
| 1432            | 2to5     | Japan                 | NA                                            | Field/RemoteSensing         | O. keta                            | Marine             | Temperature_marine                                             | Growth, Mortality     | Environment,                       | Demography, Physiology |

| Citation number | Duration | Region                 | Subregion     | Type of study                    | Species                       | Life stage                    | Driver                                                       | Response                              | Driver Process                                        | Response Process          |
|-----------------|----------|------------------------|---------------|----------------------------------|-------------------------------|-------------------------------|--------------------------------------------------------------|---------------------------------------|-------------------------------------------------------|---------------------------|
| 1433            | 10plus   | Japan                  | NA            | Field/<br>RemoteSensing          | O. keta                       | Juvenile,<br>Marine           | Management,<br>Temperature_<br>marine                        | Mortality                             | Environment, ,<br>Management                          | Demography                |
| 1434            | 2to5     | Europe                 | NA            | Field/<br>RemoteSensing          | S. trutta                     | Juvenile                      | Flow,<br>Management                                          | Habitat_Distribution                  | Environment, ,<br>Management                          | Dispersal                 |
| 1435            | 10plus   | Europe                 | NA            | Field/<br>RemoteSensing          | S. salar                      | Juvenile                      | Density_Food,<br>Flow, Habitat,<br>Management                | Growth, Productivity                  | Species_interactions,<br>Environment, ,<br>Management | Demography,<br>Physiology |
| 1436            | 2to5     | Europe                 | NA            | Field/<br>RemoteSensing          | S. salar                      | Marine                        | Disease,<br>Fisheries,<br>Temperature_<br>marine             | NA                                    | Species_interactions,<br>Environment, ,<br>Management | NA                        |
| 1437            | NA       | Europe                 | NA            | Model,<br>Projections/<br>salmon | S. trutta                     | Egg, Juvenile                 | Flow,<br>Temperature_<br>FW                                  | Habitat_Distribution,<br>Life_history | Environment,                                          | Dispersal,<br>Demography  |
| 1438            | 10plus   | California             | California_N  | Field/<br>RemoteSensing          | O. tshawytscha,<br>Other_fish | Marine                        | Density_Food,<br>Prey,<br>Temperature_<br>marine             | NA                                    | Species_interactions,<br>Environment,                 | NA                        |
| 1439            | 10plus   | California             | California_N  | Field/<br>RemoteSensing          | Other_species                 | Marine                        | Density_Food,<br>Ecosystem,<br>Temperature_<br>marine        | NA                                    | Species_interactions,<br>Environment,                 | NA                        |
| 1440            | 10plus   | California             | California_CV | Field/<br>RemoteSensing          | O. tshawytscha                | Egg, Spawning,<br>Upmigration | Flow,<br>Management,<br>Temperature_<br>FW                   | Mortality                             | Environment, ,<br>Management                          | Demography                |
| 1441            | 1        | East_North_A<br>merica | NA            | Lab/<br>Experimental             | O. mykiss                     | Juvenile,<br>Upmigration      | Contaminants,<br>Dissolved_oxyg<br>en,<br>Temperature_<br>FW | Performance,<br>Physiology_Condition  | Environment,                                          | Physiology                |
| 1442            | 1        | East_North_A<br>merica | NA            | Lab/<br>Experimental             | O. mykiss                     | Juvenile                      | Contaminants,<br>Dissolved_oxyg<br>en,<br>Temperature_<br>FW | Performance,<br>Physiology_Condition  | Environment,                                          | Physiology                |

| Citation number | Duration | Region                      | Subregion                                          | Type of study              | Species                    | Life stage                      | Driver                                    | Response                                               | Driver Process                                  | Response Process       |
|-----------------|----------|-----------------------------|----------------------------------------------------|----------------------------|----------------------------|---------------------------------|-------------------------------------------|--------------------------------------------------------|-------------------------------------------------|------------------------|
| 1443            | 2to5     | British_Columbia, Northwest | British_Columbia_not_Fraser, Northwest_Puget_Sound | Field/RemoteSensing        | O. tshawytscha             | Marine                          | Predators                                 | NA                                                     | Species_interactions,                           | NA                     |
| 1444            | 10plus   | California, Northwest       | California_CV, California_N, Northwest_Puget_Sound | Field/RemoteSensing, Model | O. tshawytscha             | Marine, Population              | Climate_indices, Methods                  | Productivity                                           | Environment,                                    | Demography             |
| 1445            | 2to5     | California                  | California_CV                                      | Field/RemoteSensing, Model | O. mykiss                  | Population                      | Density_Food, Genetics, Temperature_FW    | Growth, Life_history, Maturation, Mortality, Phenology | Species_interactions, Evolution, Environment,   | Demography, Physiology |
| 1446            | 10plus   | California                  | California_CV                                      | Field/RemoteSensing        | O. tshawytscha             | Marine                          | Climate_indices, Fisheries                | Growth                                                 | Environment, , Management                       | Physiology             |
| 1447            | 10plus   | Largescale                  | NA                                                 | Field/RemoteSensing        | General                    | Juvenile                        | Flow                                      | NA                                                     | Environment,                                    | NA                     |
| 1448            | 1        | Alaska, Europe              | Alaska_W                                           | Lab/Experimental           | Other_fish                 | Upmigration                     | Genetics, Temperature_FW                  | Genetics_Adaptation, Phenology                         | Evolution, Environment,                         | Demography, Evolution  |
| 1449            | NA       | California                  | California_N                                       | Model                      | O. kisutch, O. tshawytscha | Upmigration                     | Disease, Flow, Management, Temperature_FW | Population_resilience                                  | Species_interactions, Environment, , Management | Demography             |
| 1450            | 10plus   | Northwest                   | Northwest_Puget_Sound                              | Field/RemoteSensing, Model | O. mykiss                  | Population                      | Climate_indices, Density_Food, Management | Population_resilience, Productivity                    | Species_interactions, Environment, , Management | Demography             |
| 1451            | NA       | NA                          | NA                                                 | Theoretical/Opinion        | General                    | Evolution, Population           | Habitat                                   | Productivity                                           | Environment,                                    | Demography             |
| 1452            | 2to5     | Europe                      | NA                                                 | Lab/Experimental           | S. trutta                  | Juvenile, Spawning, Upmigration | Disease, Temperature_FW                   | Mortality, Performance                                 | Species_interactions, Environment,              | Demography, Physiology |
| 1453            | 10plus   | Largescale                  | NA                                                 | Field/RemoteSensing        | Other_species              | Marine                          | Climate_indices, Ecosystem                | Mortality, Productivity                                | Species_interactions, Environment,              | Demography             |
| 1454            | 10plus   | East_North_America          | NA                                                 | Field/RemoteSensing        | Other_fish                 | Spawning                        | NA                                        | Phenology                                              |                                                 | Demography             |

| Citation number | Duration | Region           | Subregion                   | Type of study                                    | Species                                                        | Life stage                      | Driver                                                  | Response                                     | Driver Process                                  | Response Process                  |
|-----------------|----------|------------------|-----------------------------|--------------------------------------------------|----------------------------------------------------------------|---------------------------------|---------------------------------------------------------|----------------------------------------------|-------------------------------------------------|-----------------------------------|
| 1455            | 2to5     | Alaska           | Alaska_W                    | Field/<br>RemoteSensing                          | O. gorbuscha, O. kisutch, O. tshawytscha, Other_fish, S. malma | Juvenile, Spawning              | Density_Food, Ecosystem, Flow, Habitat, Predators, Prey | Habitat_Distribution                         | Species_interactions, Environment,              | Dispersal                         |
| 1456            | 10plus   | Alaska           | Alaska_S                    | Field/<br>RemoteSensing, Review/<br>MetaAnalysis | O. tshawytscha                                                 | Freshwater_habitat, General     | Environment, Flow, Habitat, Temperature_FW              | Habitat_Distribution, Population_resilience  | Environment,                                    | Dispersal, Demography             |
| 1457            | 1        | Europe           | NA                          | Field/<br>RemoteSensing                          | Other_species                                                  | Juvenile                        | Density_Food, Flow, Management                          | NA                                           | Species_interactions, Environment, , Management | NA                                |
| 1458            | NA       | Alaska           | Alaska_SE                   | Field/<br>RemoteSensing                          | O. kisutch                                                     | Evolution                       | Genetics, Habitat                                       | Genetics_Adaptation, Habitat_Distribution    | Evolution, Environment,                         | Dispersal, Evolution              |
| 1459            | 2to5     | Alaska           | Alaska_W                    | Field/<br>RemoteSensing                          | O. nerka                                                       | Marine, Outmigration            | Genetics                                                | Life_history, Phenology                      | Evolution,                                      | Demography                        |
| 1460            | 2to5     | Northwest        | Northwest_Coastal           | Field/<br>RemoteSensing                          | General                                                        | Freshwater_habitat              | Flow, Management                                        | NA                                           | Environment, , Management                       | NA                                |
| 1461            | 2to5     | Alaska, Russia   | Alaska_S, Alaska_W          | Field/<br>RemoteSensing                          | O. tshawytscha                                                 | Marine                          | Predators                                               | Mortality                                    | Species_interactions,                           | Demography                        |
| 1462            | 10plus   | British_Columbia | British_Columbia_not_Fraser | Field/<br>RemoteSensing                          | O. nerka, Other_fish                                           | Juvenile                        | Ecosystem, Environment, Management, Temperature_FW      | NA                                           | Species_interactions, Environment, , Management | NA                                |
| 1463            | 2to5     | California       | California_CV               | Field/<br>RemoteSensing                          | O. tshawytscha                                                 | Egg, Juvenile                   | Flow, Management                                        | Mortality                                    | Environment, , Management                       | Demography                        |
| 1464            | NA       | NA               | NA                          | Theoretical/<br>Opinion                          | O. mykiss, O. tshawytscha                                      | Marine                          | Habitat, Management                                     | Population_resilience                        | Environment, , Management                       | Demography                        |
| 1465            | 10plus   | Alaska           | Alaska_SE                   | Field/<br>RemoteSensing                          | O. gorbuscha, O. keta, O. kisutch, O. nerka, S. malma          | Juvenile, Spawning, Upmigration | Predators                                               | Mortality, Phenology                         | Species_interactions,                           | Demography                        |
| 1466            | 2to5     | Alaska           | Alaska_SE                   | Field/<br>RemoteSensing                          | O. gorbuscha, O. keta                                          | Spawning, Upmigration           | Density_Food, Dissolved_oxygen                          | Habitat_Distribution, Mortality, Performance | Species_interactions, Environment,              | Dispersal, Demography, Physiology |

| Citation number | Duration | Region                   | Subregion                              | Type of study                                 | Species                    | Life stage                  | Driver                                   | Response                        | Driver Process                     | Response Process       |
|-----------------|----------|--------------------------|----------------------------------------|-----------------------------------------------|----------------------------|-----------------------------|------------------------------------------|---------------------------------|------------------------------------|------------------------|
| 1467            | NA       | NA                       | NA                                     | Review/<br>MetaAnalysis                       | General                    | Spawning                    | Dissolved_oxygen,<br>Temperature_<br>FW  | Physiology_Condition            | Environment,                       | Physiology             |
| 1468            | 2to5     | Northwest                | Northwest_Columbia                     | Field/<br>RemoteSensing                       | O. clarkii, S. confluentus | Freshwater_habitat, General | Environment, Habitat, Temperature_<br>FW | Habitat_Distribution            | Environment,                       | Dispersal              |
| 1469            | 2to5     | Alaska                   | Alaska_S                               | Field/<br>RemoteSensing                       | O. kisutch                 | Juvenile                    | Habitat                                  | Behaviour, Habitat_Distribution | Environment,                       | Dispersal              |
| 1470            | NA       | Alaska                   | Alaska_S                               | Model, Projections/<br>physical               | General, Salmonid_general  | Freshwater_habitat          | Habitat, Temperature_<br>FW              | NA                              | Environment,                       | NA                     |
| 1471            | 10plus   | Europe                   | NA                                     | Field/<br>RemoteSensing                       | S. salar, S. trutta        | Freshwater_habitat          | Acidity, Contaminants, Restoration       | Productivity                    | Environment, ,<br>Management       | Demography             |
| 1472            | 1        | California               | California_CV, California_S            | Field/<br>RemoteSensing, Lab/<br>Experimental | O. mykiss                  | Juvenile                    | Disease                                  | Mortality, Physiology_Condition | Species_interactions,              | Demography, Physiology |
| 1473            | 2to5     | Northwest                | Northwest_Coastal                      | Field/<br>RemoteSensing                       | Other_species              | Marine                      | Density_Food, Temperature_<br>marine     | Productivity                    | Species_interactions, Environment, | Demography             |
| 1474            | NA       | Alaska                   | Alaska_SE                              | Projections/<br>salmon                        | Salmonid_general           | Juvenile, Spawning          | Flow, Habitat, Temperature_<br>FW        | Habitat_Distribution            | Environment,                       | Dispersal              |
| 1475            | NA       | Alaska, British_Columbia | Alaska_SE, British_Columbia_not_Fraser | Review/<br>MetaAnalysis                       | General                    | Freshwater_habitat          | Environment, Flow, Temperature_<br>FW    | NA                              | Environment,                       | NA                     |
| 1476            | 10plus   | Largescale               | NA                                     | Field/<br>RemoteSensing, Model                | O. tshawytscha             | Marine                      | Climate_indices, Temperature_<br>marine  | Productivity                    | Environment,                       | Demography             |

| Citation number | Duration | Region                                          | Subregion                                                                | Type of study                                  | Species                              | Life stage                 | Driver                                   | Response                                      | Driver Process                                  | Response Process       |
|-----------------|----------|-------------------------------------------------|--------------------------------------------------------------------------|------------------------------------------------|--------------------------------------|----------------------------|------------------------------------------|-----------------------------------------------|-------------------------------------------------|------------------------|
| 1477            | 10plus   | British_Columbia, Northwest                     | British_Columbia_Fraser, British_Columbia_not_Fraser, Northwest_Columbia | Field/RemoteSensing                            | O. tshawytscha                       | Marine                     | NA                                       | Behaviour, Habitat_Distribution, Life_history |                                                 | Dispersal, Demography  |
| 1478            | 10plus   | Largescale                                      | NA                                                                       | Field/RemoteSensing                            | O. tshawytscha                       | Marine                     | Climate_indices, Temperature_marine      | Productivity                                  | Environment,                                    | Demography             |
| 1479            | 2to5     | British_Columbia                                | British_Columbia_not_Fraser                                              | Field/RemoteSensing                            | O. kisutch, O. nerka, O. tshawytscha | Outmigration               | NA                                       | Habitat_Distribution                          |                                                 | Dispersal              |
| 1480            | 2to5     | East_North_America                              | NA                                                                       | Field/RemoteSensing                            | S. salar                             | Marine                     | Disease, Ecosystem, Habitat, Prey        | Habitat_Distribution                          | Species_interactions, Environment,              | Dispersal              |
| 1481            | 2to5     | British_Columbia                                | British_Columbia_Fraser                                                  | Field/RemoteSensing                            | O. clarkii                           | Juvenile                   | Density_Food, Flow                       | Growth, Mortality                             | Species_interactions, Environment,              | Demography, Physiology |
| 1482            | 10plus   | Alaska, British_Columbia, California, Northwest | NA                                                                       | Field/RemoteSensing, Model, Projections/salmon | O. tshawytscha                       | Marine                     | Temperature_marine                       | Habitat_Distribution                          | Environment,                                    | Dispersal              |
| 1483            | 10plus   | Largescale                                      | NA                                                                       | Field/RemoteSensing, Model                     | O. tshawytscha                       | Marine                     | Fisheries, Habitat                       | Habitat_Distribution                          | Environment, , Management                       | Dispersal              |
| 1484            | 10plus   | Europe                                          | NA                                                                       | Field/RemoteSensing                            | S. salar                             | Marine                     | Climate_indices, Disease, Fisheries      | Carryover, Mortality                          | Species_interactions, Environment, , Management | Demography             |
| 1485            | 6to10    | British_Columbia                                | British_Columbia_not_Fraser                                              | Field/RemoteSensing                            | O. kisutch, O. tshawytscha           | Juvenile, Outmigration     | Predators                                | Mortality                                     | Species_interactions,                           | Demography             |
| 1486            | NA       | British_Columbia, California, Northwest         | NA                                                                       | Model, Projections/physical                    | General                              | Freshwater_habitat, Marine | Flow, Temperature_FW, Temperature_marine | NA                                            | Environment,                                    | NA                     |

| Citation number | Duration | Region                | Subregion                       | Type of study                            | Species                                           | Life stage  | Driver                                                 | Response                                   | Driver Process                       | Response Process                  |
|-----------------|----------|-----------------------|---------------------------------|------------------------------------------|---------------------------------------------------|-------------|--------------------------------------------------------|--------------------------------------------|--------------------------------------|-----------------------------------|
| 1487            | NA       | Alaska, Russia        | Alaska_S, Alaska_W              | Field/RemoteSensing                      | O. keta                                           | Population  | Genetics                                               | NA                                         | Evolution,                           | NA                                |
| 1488            | 1        | British_Columbia      | British_Columbia_Fraser         | Field/RemoteSensing                      | O. kisutch, O. tshawytscha                        | Juvenile    | Habitat                                                | Behaviour, Habitat_Distribution            | Environment,                         | Dispersal                         |
| 1489            | 6to10    | Russia                | NA                              | Field/RemoteSensing                      | Salmonid_general                                  | Marine      | Ecosystem, Temperature_marine                          | Productivity                               | Species_interactions, Environment,   | Demography                        |
| 1490            | 10plus   | Russia                | NA                              | Field/RemoteSensing, Theoretical/Opinion | O. gorbuscha, O. keta, O. nerka, Salmonid_general | Marine      | Density_Food, Temperature_marine                       | Growth, Productivity                       | Species_interactions, Environment,   | Demography, Physiology            |
| 1491            | NA       | Russia                | NA                              | Field/RemoteSensing, Theoretical/Opinion | O. gorbuscha, O. keta, O. nerka, Salmonid_general | Marine      | Density_Food                                           | Growth, Productivity                       | Species_interactions,                | Demography, Physiology            |
| 1492            | NA       | NA                    | NA                              | Review/MetaAnalysis                      | S. salar                                          | Juvenile    | Density_Food, Habitat, Temperature_FW                  | Growth, Habitat_Distribution, Productivity | Species_interactions, Environment,   | Dispersal, Demography, Physiology |
| 1493            | NA       | California, Northwest | California_N, Northwest_Coastal | Projections/physical                     | General                                           | Marine      | Acidity, Dissolved_oxygen, Methods, Temperature_marine | NA                                         | Environment,                         | NA                                |
| 1494            | 10plus   | Northwest             | Northwest_Columbia              | Field/RemoteSensing                      | O. mykiss                                         | Upmigration | Fisheries, Flow, Habitat, Management, Temperature_FW   | Behaviour, Mortality                       | Environment, , Management            | Dispersal, Demography             |
| 1495            | 10plus   | Alaska                | Alaska_W                        | Field/RemoteSensing                      | O. tshawytscha                                    | Marine      | Fisheries, Genetics, Temperature_marine                | Genetics_Adaptation, Growth, Maturation    | Evolution, Environment, , Management | Evolution, Physiology             |
| 1496            | 10plus   | Alaska                | Alaska_W                        | Field/RemoteSensing                      | O. tshawytscha                                    | Marine      | Temperature_marine                                     | Growth, Maturation                         | Environment,                         | Physiology                        |

| Citation number | Duration | Region                | Subregion          | Type of study       | Species                               | Life stage             | Driver                                             | Response                            | Driver Process                                 | Response Process       |
|-----------------|----------|-----------------------|--------------------|---------------------|---------------------------------------|------------------------|----------------------------------------------------|-------------------------------------|------------------------------------------------|------------------------|
| 1497            | 10plus   | Northwest             | Northwest_Columbia | Field/RemoteSensing | O. tshawytscha                        | Upmigration            | Flow, Management, Temperature_FW                   | Behaviour, Mortality                | Environment, , Management                      | Dispersal, Demography  |
| 1498            | 1        | Europe                | NA                 | Field/RemoteSensing | S. salar                              | Outmigration           | Flow, Management                                   | Behaviour                           | Environment, , Management                      | Dispersal              |
| 1499            | 2to5     | Mountain_west         | NA                 | Field/RemoteSensing | O. clarkii                            | Population             | Flow                                               | Population_resilience, Productivity | Environment,                                   | Demography             |
| 1500            | 10plus   | Europe                | NA                 | Field/RemoteSensing | S. salar                              | Juvenile               | Density_Food, Flow, Habitat, Temperature_FW        | Growth                              | Species_interactions, Environment,             | Physiology             |
| 1501            | 10plus   | Europe                | NA                 | Field/RemoteSensing | S. salar                              | Outmigration           | Dissolved_oxygen, Environment, Temperature_marine  | Carryover, Growth, Mortality        | Environment,                                   | Demography, Physiology |
| 1502            | 10plus   | Europe                | NA                 | Field/RemoteSensing | S. salar                              | Outmigration           | Flow, Temperature_FW                               | Phenology                           | Environment,                                   | Demography             |
| 1503            | 1        | Australia_New Zealand | NA                 | Lab/Experimental    | Other_fish                            | Marine                 | Acidity                                            | Performance                         | Environment,                                   | Physiology             |
| 1504            | 1        | California            | California_CV      | Field/RemoteSensing | O. tshawytscha                        | Outmigration           | Flow                                               | Habitat_Distribution, Mortality     | Environment,                                   | Dispersal, Demography  |
| 1505            | NA       | Mountain_west         | NA                 | Review/MetaAnalysis | O. clarkii, O. mykiss, S. confluentus | Population             | Flow, Genetics, Habitat, Invasives, Temperature_FW | Population_resilience               | Species_interactions, Evolution*, Environment, | Demography             |
| 1506            | 1        | Europe                | NA                 | Lab/Experimental    | S. salar                              | Juvenile, Marine       | Prey, Temperature_marine                           | Mortality, Physiology_Condition     | Species_interactions, Environment,             | Demography, Physiology |
| 1507            | 6to10    | Alaska                | Alaska_SE          | Field/RemoteSensing | O. gorbuscha                          | Marine                 | Environment, Prey                                  | Growth                              | Species_interactions, Environment,             | Physiology             |
| 1508            | 6to10    | Europe                | NA                 | Field/RemoteSensing | S. salar                              | Juvenile, Outmigration | Management                                         | Phenology                           | , Management                                   | Demography             |
| 1509            | 2to5     | California            | California_S       | Field/RemoteSensing | O. mykiss                             | Juvenile, Upmigration  | Temperature_FW                                     | Behaviour, Habitat_Distribution     | Environment,                                   | Dispersal              |



| Citation number | Duration | Region                             | Subregion                                                     | Type of study           | Species                                     | Life stage                       | Driver                                                                                          | Response                                                    | Driver Process                        | Response Process         |
|-----------------|----------|------------------------------------|---------------------------------------------------------------|-------------------------|---------------------------------------------|----------------------------------|-------------------------------------------------------------------------------------------------|-------------------------------------------------------------|---------------------------------------|--------------------------|
| 1510            | NA       | NA                                 | NA                                                            | Review/<br>MetaAnalysis | Salmonid_<br>general                        | Spawning                         | Density_Food,<br>Temperature_<br>FW                                                             | Growth, Maturation                                          | Species_interactions,<br>Environment, | Physiology               |
| 1511            | NA       | NA                                 | NA                                                            | Review/<br>MetaAnalysis | S. salar, S. trutta                         | Egg, Spawning                    | Dissolved_oxyg<br>en, Flow,<br>Habitat,<br>Temperature_<br>FW                                   | Population_resilience                                       | Environment,                          | Demography               |
| 1512            | 6to10    | California                         | California_S                                                  | Field/<br>RemoteSensing | O. mykiss                                   | Freshwater_ha<br>bitat, Spawning | Environment,<br>Habitat,<br>Management                                                          | NA                                                          | Environment, ,<br>Management          | NA                       |
| 1513            | NA       | NA                                 | NA                                                            | Theoretical/<br>Opinion | General                                     | General                          | Management,<br>Methods                                                                          | Population_resilience                                       | , Management                          | Demography               |
| 1514            | 2to5     | Northwest                          | Northwest_Col<br>umbia                                        | Field/<br>RemoteSensing | O. tshawytscha                              | Spawning,<br>Upmigration         | Habitat                                                                                         | Habitat_Distribution                                        | Environment,                          | Dispersal                |
| 1515            | NA       | Northwest                          | Northwest_Col<br>umbia                                        | Model                   | O. mykiss, O.<br>tshawytscha                | Upmigration                      | Habitat,<br>Temperature_<br>FW                                                                  | Behaviour,<br>Habitat_Distribution,<br>Physiology_Condition | Environment,                          | Dispersal,<br>Physiology |
| 1516            | NA       | British_Colum<br>bia,<br>Northwest | British_Columb<br>ia_not_Fraser,<br>Northwest_Pu<br>get_Sound | Review/<br>MetaAnalysis | General                                     | Marine                           | Acidity,<br>Dissolved_oxyg<br>en, Ecosystem,<br>Environment,<br>Temperature_<br>marine          | NA                                                          | Species_interactions,<br>Environment, | NA                       |
| 1517            | NA       | British_Colum<br>bia,<br>Northwest | British_Columb<br>ia_not_Fraser,<br>Northwest_Pu<br>get_Sound | Model                   | O. kisutch, O.<br>mykiss, O.<br>tshawytscha | Marine                           | Density_Food,<br>Ecosystem,<br>Environment,<br>Habitat,<br>Predators,<br>Temperature_<br>marine | Mortality, Productivity                                     | Species_interactions,<br>Environment, | Demography               |

| Citation number | Duration | Region                      | Subregion                                          | Type of study              | Species                                                              | Life stage                  | Driver                                                                                                   | Response                                              | Driver Process                     | Response Process       |
|-----------------|----------|-----------------------------|----------------------------------------------------|----------------------------|----------------------------------------------------------------------|-----------------------------|----------------------------------------------------------------------------------------------------------|-------------------------------------------------------|------------------------------------|------------------------|
| 1518            | 10plus   | British_Columbia, Northwest | British_Columbia_not_Fraser, Northwest_Puget_Sound | Field/RemoteSensing, Model | O. kisutch, O. tshawytscha                                           | Marine                      | Climate_indices, Density_Food, Environment, Flow, Methods, Predators, Temperature_FW, Temperature_marine | Mortality                                             | Species_interactions, Environment, | Demography             |
| 1519            | 10plus   | Northwest                   | Northwest_Puget_Sound                              | Field/RemoteSensing        | O. mykiss                                                            | Marine                      | Climate_indices, Density_Food, Environment, Predators, Temperature_marine                                | Mortality                                             | Species_interactions, Environment, | Demography             |
| 1520            | 2to5     | California                  | California_CV, California_S                        | Field/RemoteSensing        | O. mykiss                                                            | Juvenile                    | Habitat                                                                                                  | Growth, Life_history, Phenology, Physiology_Condition | Environment,                       | Demography, Physiology |
| 1521            | NA       | Europe                      | NA                                                 | Theoretical/Opinion        | S. salar, S. trutta                                                  | Freshwater_habitat, General | Habitat, Management                                                                                      | Population_resilience                                 | Environment, , Management          | Demography             |
| 1522            | NA       | NA                          | NA                                                 | Theoretical/Opinion        | Other_species                                                        | Juvenile                    | Density_Food                                                                                             | NA                                                    | Species_interactions,              | NA                     |
| 1523            | 6to10    | Northwest                   | Northwest_Columbia                                 | Field/RemoteSensing        | O. clarkii, O. keta, O. kisutch, O. mykiss, O. nerka, O. tshawytscha | Outmigration                | Contaminants, Habitat, Restoration                                                                       | Habitat_Distribution                                  | Environment, , Management          | Dispersal              |
| 1524            | 6to10    | Northwest                   | Northwest_Columbia                                 | Field/RemoteSensing        | Other_fish, Salmonid_general                                         | Outmigration                | Habitat, Invasives, Temperature_FW                                                                       | Habitat_Distribution                                  | Species_interactions, Environment, | Dispersal              |
| 1525            | NA       | Northwest                   | Northwest_Coastal                                  | Review/MetaAnalysis        | General                                                              | Marine                      | Acidity                                                                                                  | NA                                                    | Environment,                       | NA                     |

| Citation number | Duration | Region                                    | Subregion                                                       | Type of study                                    | Species                 | Life stage                             | Driver                                        | Response                                           | Driver Process                                        | Response Process          |
|-----------------|----------|-------------------------------------------|-----------------------------------------------------------------|--------------------------------------------------|-------------------------|----------------------------------------|-----------------------------------------------|----------------------------------------------------|-------------------------------------------------------|---------------------------|
| 1526            | 1        | Europe                                    | NA                                                              | Lab/<br>Experimental                             | General,<br>Other_fish  | Evolution,<br>Juvenile,<br>Upmigration | Dissolved_oxygen                              | Mortality,<br>Performance,<br>Physiology_Condition | Environment,                                          | Demography,<br>Physiology |
| 1527            | 10plus   | East_North_America                        | NA                                                              | Field/<br>RemoteSensing                          | S. salar                | Marine                                 | Management,<br>Temperature_marine             | Maturation,<br>Productivity                        | Environment, ,<br>Management                          | Demography,<br>Physiology |
| 1528            | 1        | California                                | California_N                                                    | Field/<br>RemoteSensing,<br>Lab/<br>Experimental | O. tshawytscha          | Juvenile                               | Disease                                       | Immune,<br>Physiology_Condition                    | Species_interactions,                                 | Physiology                |
| 1529            | 1        | Asia_other                                | NA                                                              | Lab/<br>Experimental                             | O. mykiss               | Juvenile,<br>Upmigration               | Contaminants,<br>Temperature_FW               | Performance,<br>Physiology_Condition               | Environment,                                          | Physiology                |
| 1530            | 1        | Northwest                                 | Northwest_Puget_Sound                                           | Field/<br>RemoteSensing                          | O. kisutch              | Juvenile                               | Contaminants,<br>Habitat,<br>Temperature_FW   | Growth                                             | Environment,                                          | Physiology                |
| 1531            | 2to5     | Alaska                                    | Alaska_W                                                        | Model,<br>Projections/<br>salmon                 | O. nerka                | Egg                                    | Temperature_FW                                | Phenology                                          | Environment,                                          | Demography                |
| 1532            | NA       | Alaska                                    | Alaska_W                                                        | Lab/<br>Experimental                             | O. nerka                | Egg                                    | Temperature_FW                                | Genetics_Adaptation,<br>Phenology                  | Environment,                                          | Demography,<br>Evolution  |
| 1533            | 10plus   | Alaska,<br>British_Columbia,<br>Northwest | Alaska_SE,<br>British_Columbia_not_Fraser,<br>Northwest_Coastal | Field/<br>RemoteSensing                          | O. kisutch              | Juvenile,<br>Outmigration              | Environment,<br>Flow,<br>Temperature_FW       | Phenology                                          | Environment,                                          | Demography                |
| 1534            | 10plus   | Largescale                                | NA                                                              | Field/<br>RemoteSensing                          | O. kisutch              | Juvenile,<br>Outmigration              | Habitat                                       | Phenology                                          | Environment,                                          | Demography                |
| 1535            | 10plus   | Alaska                                    | Alaska_W                                                        | Field/<br>RemoteSensing                          | O. gorbuscha            | Marine                                 | Ecosystem,<br>Prey                            | NA                                                 | Species_interactions,                                 | NA                        |
| 1536            | NA       | California                                | California_CV                                                   | Model                                            | General, O. tshawytscha | Freshwater_habitat, Juvenile           | Ecosystem,<br>Flow,<br>Management,<br>Methods | Behaviour,<br>Habitat_Distribution                 | Species_interactions,<br>Environment, ,<br>Management | Dispersal                 |

| Citation number | Duration | Region             | Subregion                                 | Type of study                    | Species                         | Life stage                 | Driver                                                   | Response                           | Driver Process                                  | Response Process       |
|-----------------|----------|--------------------|-------------------------------------------|----------------------------------|---------------------------------|----------------------------|----------------------------------------------------------|------------------------------------|-------------------------------------------------|------------------------|
| 1537            | 6to10    | Alaska             | Alaska_W                                  | Field/<br>RemoteSensing          | O. gorbuscha, O. nerka          | Marine                     | Density_Food, Ecosystem, Environment, Temperature_marine | Habitat_Distribution, Productivity | Species_interactions, Environment,              | Dispersal, Demography  |
| 1538            | 10plus   | Largescale         | NA                                        | Field/<br>RemoteSensing          | O. gorbuscha, O. keta, O. nerka | Marine                     | Climate_indices                                          | Habitat_Distribution, Productivity | Environment,                                    | Dispersal, Demography  |
| 1539            | 2to5     | California         | California_N                              | Field/<br>RemoteSensing          | Other_species                   | Juvenile                   | Density_Food, Habitat, Restoration                       | NA                                 | Species_interactions, Environment, , Management | NA                     |
| 1540            | NA       | Largescale         | NA                                        | Review/<br>MetaAnalysis          | General                         | Freshwater_habitat, Marine | Ecosystem                                                | Population_resilience              | Species_interactions,                           | Demography             |
| 1541            | 2to5     | California         | California_CV                             | Field/<br>RemoteSensing, Model   | O. tshawytscha                  | Outmigration               | Habitat, Methods, Predators                              | Habitat_Distribution, Mortality    | Species_interactions, Environment,              | Dispersal, Demography  |
| 1542            | 10plus   | Northwest          | Northwest_Puget_Sound                     | Field/<br>RemoteSensing          | General                         | Freshwater_habitat         | Temperature_FW                                           | Phenology, Population_resilience   | Environment,                                    | Demography             |
| 1543            | NA       | Northwest          | Northwest_Coastal                         | Field/<br>RemoteSensing          | O. kisutch                      | Juvenile                   | Habitat, Management, Temperature_FW                      | Habitat_Distribution               | Environment, , Management                       | Dispersal              |
| 1544            | NA       | Northwest          | Northwest_Columbia, Northwest_Puget_Sound | Theoretical/<br>Opinion          | General                         | Freshwater_habitat         | Management, Methods, Temperature_FW                      | NA                                 | Environment, , Management                       | NA                     |
| 1545            | NA       | Largescale         | NA                                        | Model, Projections/<br>ecosystem | General                         | Marine                     | NA                                                       | Productivity                       |                                                 | Demography             |
| 1546            | 1        | Europe             | NA                                        | Field/<br>RemoteSensing          | S. trutta                       | Evolution                  | Genetics, Habitat                                        | Genetics_Adaptation, Morphology    | Evolution, Environment,                         | Evolution, Physiology  |
| 1547            | NA       | NA                 | NA                                        | Review/<br>MetaAnalysis          | General                         | General                    | Ecosystem, Methods                                       | NA                                 | Species_interactions,                           | NA                     |
| 1548            | NA       | California         | California_N                              | Review/<br>MetaAnalysis          | O. kisutch                      | Juvenile                   | Management, Temperature_FW                               | Growth, Physiology_Condition       | Environment, , Management                       | Physiology             |
| 1549            | 1        | East_North_America | NA                                        | Lab/<br>Experimental             | O. tshawytscha                  | Egg, Spawning              | NA                                                       | Mortality, Performance             |                                                 | Demography, Physiology |

| Citation number | Duration  | Region                     | Subregion                       | Type of study                  | Species               | Life stage           | Driver                                            | Response                                               | Driver Process                     | Response Process                  |
|-----------------|-----------|----------------------------|---------------------------------|--------------------------------|-----------------------|----------------------|---------------------------------------------------|--------------------------------------------------------|------------------------------------|-----------------------------------|
| 1550            | 10plus, 2 | California                 | California_CV                   | Field/<br>RemoteSensing        | General               | Freshwater_habitat   | Flow, Management                                  | Livelihood                                             | Environment, Management            | Management                        |
| 1551            | 10plus    | Northwest                  | Northwest_Puget_Sound           | Field/<br>RemoteSensing        | O. tshawytscha        | Marine               | Predators                                         | NA                                                     | Species_interactions,              | NA                                |
| 1552            | 6to10     | East_North_America         | NA                              | Field/<br>RemoteSensing        | S. salar              | Outmigration         | Flow, Management                                  | Phenology, Physiology_Condition                        | Environment, Management            | Demography, Physiology            |
| 1553            | 10plus    | Europe                     | NA                              | Field/<br>RemoteSensing        | Other_species         | Juvenile             | Environment, Temperature_FW                       | NA                                                     | Environment,                       | NA                                |
| 1554            | 6to10     | Europe                     | NA                              | Field/<br>RemoteSensing        | O. tshawytscha        | Marine               | Disease, Environment, Methods, Temperature_marine | Mortality                                              | Species_interactions, Environment, | Demography                        |
| 1555            | 1         | East_North_America         | NA                              | Lab/<br>Experimental           | S. fontinalis         | Evolution, Juvenile  | Temperature_FW                                    | Genetics_Adaptation, Performance, Physiology_Condition | Environment,                       | Evolution, Physiology             |
| 1556            | 10plus    | California, Northwest      | California_N, Northwest_Coastal | Field/<br>RemoteSensing, Model | Other_fish            | Marine               | Fisheries, Methods                                | Mortality                                              | , Management                       | Demography                        |
| 1557            | NA        | Northwest                  | Northwest_Columbia              | Theoretical/<br>Opinion        | O. tshawytscha        | Outmigration         | Management, Methods                               | Behaviour, Mortality                                   | , Management                       | Dispersal, Demography             |
| 1558            | 2to5      | Northwest                  | Northwest_Columbia              | Field/<br>RemoteSensing        | O. clarkii, O. mykiss | General              | Genetics, Temperature_FW                          | Genetics_Adaptation, Growth, Life_history              | Evolution, Environment,            | Demography, Evolution, Physiology |
| 1559            | 2to5      | California                 | California_N                    | Field/<br>RemoteSensing        | O. tshawytscha        | Upmigration          | Dissolved_oxygen, Temperature_FW                  | Behaviour, Habitat_Distribution                        | Environment,                       | Dispersal                         |
| 1560            | 6to10     | California                 | California_N                    | Field/<br>RemoteSensing        | O. tshawytscha        | Upmigration          | Disease, Habitat, Temperature_FW                  | Behaviour, Habitat_Distribution                        | Species_interactions, Environment, | Dispersal                         |
| 1561            | 1         | Europe                     | NA                              | Lab/<br>Experimental           | S. salar              | Marine, Outmigration | Density_Food, Environment                         | Growth, Physiology_Condition                           | Species_interactions, Environment, | Physiology                        |
| 1562            | 6to10     | East_North_America, Europe | NA                              | Field/<br>RemoteSensing        | S. salar              | Marine               | Predators                                         | Mortality                                              | Species_interactions,              | Demography                        |

| Citation number | Duration | Region                                                               | Subregion                                               | Type of study                     | Species                         | Life stage                                 | Driver                                              | Response                                                        | Driver Process                             | Response Process          |
|-----------------|----------|----------------------------------------------------------------------|---------------------------------------------------------|-----------------------------------|---------------------------------|--------------------------------------------|-----------------------------------------------------|-----------------------------------------------------------------|--------------------------------------------|---------------------------|
| 1563            | 6to10    | Europe                                                               | NA                                                      | Field/<br>RemoteSensing           | S. salar                        | Marine                                     | Temperature_<br>marine                              | Habitat_Distribution                                            | Environment,                               | Dispersal                 |
| 1564            | 2to5     | East_North_America                                                   | NA                                                      | Field/<br>RemoteSensing,<br>Model | S. salar                        | Juvenile,<br>Marine                        | Density_Food,<br>Environment,<br>Temperature_<br>FW | Behaviour, Phenology                                            | Species_interactions,<br>Environment,      | Dispersal,<br>Demography  |
| 1565            | 1        | British_Columbia                                                     | British_Columbia_Fraser,<br>British_Columbia_not_Fraser | Lab/<br>Experimental              | O. mykiss                       | Juvenile                                   | Dissolved_oxygen, Genetics,<br>Temperature_<br>FW   | Mortality,<br>Physiology_Condition                              | Evolution*,<br>Environment,                | Demography,<br>Physiology |
| 1566            | 1        | East_North_America                                                   | NA                                                      | Lab/<br>Experimental              | O. tshawytscha                  | Egg, Spawning                              | Dissolved_oxygen, Flow,<br>Temperature_<br>FW       | Carryover, Mortality,<br>Physiology_Condition                   | Environment,                               | Demography,<br>Physiology |
| 1567            | 10plus   | Alaska                                                               | Alaska_SE                                               | Field/<br>RemoteSensing           | Other_fish,<br>Salmonid_general | Marine                                     | Predators,<br>Prey,<br>Temperature_<br>marine       | Mortality                                                       | Species_interactions,<br>Environment,      | Demography                |
| 1568            | 10plus   | California                                                           | California_CV                                           | Field/<br>RemoteSensing           | O. tshawytscha                  | Juvenile,<br>Upmigration                   | Flow, Genetics,<br>Management                       | Genetics_Adaptation,<br>Phenology                               | Evolution,<br>Environment, ,<br>Management | Demography,<br>Evolution  |
| 1569            | 6to10    | Northwest                                                            | Northwest_Coastal                                       | Field/<br>RemoteSensing           | Other_species                   | Marine                                     | Ecosystem,<br>Environment                           | NA                                                              | Species_interactions,<br>Environment,      | NA                        |
| 1570            | NA       | NA                                                                   | NA                                                      | Model,<br>Theoretical/<br>Opinion | General                         | Freshwater_habitat, General,<br>Population | Habitat                                             | Population_resilience                                           | Environment,                               | Demography                |
| 1571            | 6to10    | Alaska,<br>British_Columbia, California,<br>Largescale,<br>Northwest | NA                                                      | Field/<br>RemoteSensing           | O. tshawytscha                  | Population                                 | Management                                          | Habitat_Distribution,<br>Population_resilience,<br>Productivity | , Management                               | Dispersal,<br>Demography  |
| 1572            | NA       | NA                                                                   | NA                                                      | Review/<br>MetaAnalysis           | General                         | Evolution,<br>General                      | Ecosystem                                           | Genetics_Adaptation                                             | Species_interactions,                      | Evolution                 |

| Citation number | Duration | Region           | Subregion               | Type of study                                       | Species                                                                  | Life stage                   | Driver                                     | Response                                   | Driver Process                     | Response Process         |
|-----------------|----------|------------------|-------------------------|-----------------------------------------------------|--------------------------------------------------------------------------|------------------------------|--------------------------------------------|--------------------------------------------|------------------------------------|--------------------------|
| 1573            | NA       | NA               | NA                      | Review/<br>MetaAnalysis,<br>Theoretical/<br>Opinion | General                                                                  | Freshwater_habitat           | Habitat,<br>Temperature_<br>FW             | NA                                         | Environment,                       | NA                       |
| 1574            | 6to10    | California       | California_N            | Field/<br>RemoteSensing                             | O. tshawytscha                                                           | Juvenile,<br>Upmigration     | Flow,<br>Management                        | Genetics_Adaptation,<br>Phenology          | Environment, ,<br>Management       | Demography,<br>Evolution |
| 1575            | 10plus   | California       | California_N            | Field/<br>RemoteSensing,<br>Lab/<br>Experimental    | O. kisutch, O.<br>mykiss, O.<br>tshawytscha,<br>Other_fish, S.<br>trutta | Outmigration,<br>Spawning    | Flow, Habitat,<br>Management               | Behaviour, Phenology                       | Environment, ,<br>Management       | Dispersal,<br>Demography |
| 1576            | NA       | Europe           | NA                      | Model,<br>Projections/<br>salmon                    | S. salar                                                                 | Juvenile                     | Flow,<br>Management,<br>Temperature_<br>FW | Productivity                               | Environment, ,<br>Management       | Demography               |
| 1577            | 2to5     | Europe           | NA                      | Field/<br>RemoteSensing                             | Other_fish, S.<br>trutta                                                 | Freshwater_habitat, Juvenile | Flow, Habitat                              | Habitat_Distribution                       | Environment,                       | Dispersal                |
| 1578            | 6to10    | Alaska           | Alaska_S,<br>Alaska_SE  | Field/<br>RemoteSensing                             | General                                                                  | Marine                       | Ecosystem,<br>Temperature_<br>marine       | NA                                         | Species_interactions, Environment, | NA                       |
| 1579            | 2to5     | British_Columbia | British_Columbia_Fraser | Lab/<br>Experimental                                | O. mykiss                                                                | Juvenile                     | Genetics,<br>Temperature_<br>FW            | Physiology_Condition                       | Evolution*,<br>Environment,        | Physiology               |
| 1580            | 2to5     | California       | California_N            | Field/<br>RemoteSensing                             | O. kisutch                                                               | Juvenile,<br>Upmigration     | Habitat,<br>Temperature_<br>FW             | Behaviour,<br>Habitat_Distribution         | Environment,                       | Dispersal                |
| 1581            | 1        | Europe           | NA                      | Field/<br>RemoteSensing                             | Other_fish, S.<br>salar, S. trutta                                       | Juvenile                     | Disease                                    | Physiology_Condition                       | Species_interactions,              | Physiology               |
| 1582            | 10plus   | Europe           | NA                      | Field/<br>RemoteSensing                             | Other_fish, S.<br>salar, S. trutta                                       | Population                   | Fisheries,<br>Temperature_<br>FW           | Habitat_Distribution,<br>Productivity      | Environment, ,<br>Management       | Dispersal,<br>Demography |
| 1583            | 1        | Northwest        | Northwest_Columbia      | Field/<br>RemoteSensing,<br>Lab/<br>Experimental    | O. tshawytscha                                                           | Juvenile                     | Habitat,<br>Management                     | Behaviour                                  | Environment, ,<br>Management       | Dispersal                |
| 1584            | 2to5     | British_Columbia | Northwest_Columbia      | Field/<br>RemoteSensing                             | O. nerka                                                                 | Juvenile                     | Flow, Habitat                              | Behaviour, Growth,<br>Habitat_Distribution | Environment,                       | Dispersal,<br>Physiology |

| Citation number | Duration | Region             | Subregion                   | Type of study               | Species                              | Life stage   | Driver                                           | Response                                                 | Driver Process                     | Response Process                  |
|-----------------|----------|--------------------|-----------------------------|-----------------------------|--------------------------------------|--------------|--------------------------------------------------|----------------------------------------------------------|------------------------------------|-----------------------------------|
| 1585            | 10plus   | California         | California_CV, California_N | Field/ RemoteSensing        | O. tshawytscha                       | Marine       | Climate_indices, Ecosystem, Environment          | Productivity                                             | Species_interactions, Environment, | Demography                        |
| 1586            | 10plus   | Alaska             | Alaska_W                    | Field/ RemoteSensing        | O. gorbuscha                         | Marine       | Density_Food                                     | Productivity                                             | Species_interactions,              | Demography                        |
| 1587            | 10plus   | California         | California_N                | Field/ RemoteSensing        | General                              | Marine       | Climate_indices, Environment, Temperature_marine | NA                                                       | Environment,                       | NA                                |
| 1588            | 1        | British_Columbia   | British_Columbia_Fraser     | Lab/ Experimental           | O. tshawytscha                       | Outmigration | Temperature_FW                                   | Behaviour, Phenology, Physiology_Condition               | Environment,                       | Dispersal, Demography, Physiology |
| 1589            | NA       | East_North_America | NA                          | Field/ RemoteSensing        | S. salar                             | Evolution    | Genetics, Temperature_FW                         | Genetics_Adaptation, Habitat_Distribution                | Evolution, Environment,            | Dispersal, Evolution              |
| 1590            | 2to5     | Europe             | NA                          | Field/ RemoteSensing        | O. mykiss, Other_fish, S. fontinalis | Juvenile     | Disease, Genetics                                | Physiology_Condition                                     | Species_interactions, Evolution,   | Physiology                        |
| 1591            | 1        | Europe             | NA                          | Field/ RemoteSensing, Model | S. salar                             | Outmigration | Flow, Methods                                    | Behaviour, Phenology                                     | Environment,                       | Dispersal, Demography             |
| 1592            | 2to5     | Europe             | NA                          | Field/ RemoteSensing        | S. salar, S. trutta                  | Juvenile     | Management                                       | Behaviour, Habitat_Distribution, Life_history, Phenology | , Management                       | Dispersal, Demography             |
| 1593            | 2to5     | Northwest          | Northwest_Puget_Sound       | Field/ RemoteSensing        | O. nerka, O. tshawytscha             | Juvenile     | Invasives, Predators                             | Mortality                                                | Species_interactions,              | Demography                        |
| 1594            | 1        | East_North_America | NA                          | Lab/ Experimental           | O. mykiss                            | Juvenile     | Flow                                             | Behaviour, Performance, Physiology_Condition             | Environment,                       | Dispersal, Physiology             |
| 1595            | 10plus   | California         | California_CV               | Field/ RemoteSensing        | O. tshawytscha                       | Juvenile     | Flow, Habitat                                    | Growth, Habitat_Distribution                             | Environment,                       | Dispersal, Physiology             |



| Citation number | Duration | Region                                                   | Subregion                             | Type of study                                 | Species               | Life stage            | Driver                                                                                      | Response                               | Driver Process                                     | Response Process      |
|-----------------|----------|----------------------------------------------------------|---------------------------------------|-----------------------------------------------|-----------------------|-----------------------|---------------------------------------------------------------------------------------------|----------------------------------------|----------------------------------------------------|-----------------------|
| 1596            | NA       | British_Columbia                                         | British_Columbia_not_Fraser           | Review/<br>MetaAnalysis                       | General               | Marine                | Acidity,<br>Dissolved_oxygen, Ecosystem,<br>Fisheries,<br>Management,<br>Temperature_marine | Population_resilience,<br>Productivity | Species_interactions, Environment, ,<br>Management | Demography            |
| 1597            | 1        | Japan                                                    | NA                                    | Lab/<br>Experimental                          | O. mykiss             | Evolution             | Genetics,<br>Temperature_FW                                                                 | Genetics_Adaptation,<br>Performance    | Evolution, Environment,                            | Evolution, Physiology |
| 1598            | 6to10    | California                                               | California_S                          | Field/<br>RemoteSensing                       | Other_fish            | Marine                | Predators,<br>Temperature_marine                                                            | Habitat_Distribution                   | Species_interactions, Environment,                 | Dispersal             |
| 1599            | 10plus   | Northwest                                                | Northwest_Columbia                    | Field/<br>RemoteSensing                       | General               | Freshwater_habitat    | Flow, Habitat, Temperature_FW                                                               | NA                                     | Environment,                                       | NA                    |
| 1600            | 10plus   | California, East_North_America, Mountain_west, Northwest | NA                                    | Field/<br>RemoteSensing                       | General               | Freshwater_habitat    | Flow                                                                                        | NA                                     | Environment,                                       | NA                    |
| 1601            | 10plus   | Northwest                                                | Northwest_Columbia                    | Field/<br>RemoteSensing                       | O. mykiss             | Outmigration          | Management                                                                                  | Behaviour, Carryover                   | , Management                                       | Dispersal, Demography |
| 1602            | 1        | Europe                                                   | NA                                    | Lab/<br>Experimental                          | Other_fish, S. trutta | General               | Temperature_FW                                                                              | Performance                            | Environment,                                       | Physiology            |
| 1603            | 10plus   | East_North_America                                       | NA                                    | Field/<br>RemoteSensing                       | S. salar              | Spawning, Upmigration | Flow, Habitat                                                                               | Behaviour, Performance                 | Environment,                                       | Dispersal, Physiology |
| 1604            | 10plus   | Northwest                                                | Northwest_Coastal, Northwest_Columbia | Field/<br>RemoteSensing                       | O. tshawytscha        | Marine                | Habitat                                                                                     | Habitat_Distribution, Phenology        | Environment,                                       | Dispersal, Demography |
| 1605            | 1        | British_Columbia                                         | British_Columbia_Fraser               | Field/<br>RemoteSensing, Lab/<br>Experimental | O. tshawytscha        | Upmigration           | Disease, Fisheries, Temperature_FW                                                          | Behaviour, Mortality                   | Species_interactions, Environment, ,<br>Management | Dispersal, Demography |

| Citation number | Duration | Region                      | Subregion                                 | Type of study                            | Species                               | Life stage            | Driver                              | Response                     | Driver Process                                  | Response Process       |
|-----------------|----------|-----------------------------|-------------------------------------------|------------------------------------------|---------------------------------------|-----------------------|-------------------------------------|------------------------------|-------------------------------------------------|------------------------|
| 1606            | 1        | British_Columbia            | British_Columbia_Fraser                   | Field/RemoteSensing                      | O. nerka                              | Marine, Upmigration   | Disease, Fisheries, Temperature_FW  | Mortality                    | Species_interactions, Environment, , Management | Demography             |
| 1607            | 1        | British_Columbia            | British_Columbia_Fraser                   | Lab/Experimental                         | O. kisutch                            | Upmigration           | Disease, Fisheries, Temperature_FW  | Mortality                    | Species_interactions, Environment, , Management | Demography             |
| 1608            | 1        | Europe                      | NA                                        | Lab/Experimental                         | S. salar                              | Juvenile              | Density_Food, Flow                  | Growth                       | Species_interactions, Environment, , Management | Physiology             |
| 1609            | 10plus   | Europe                      | NA                                        | Field/RemoteSensing, Model               | S. salar                              | Outmigration          | Management, Methods, Temperature_FW | Phenology                    | Environment, , Management                       | Demography             |
| 1610            | NA       | British_Columbia, Northwest | NA                                        | Review/MetaAnalysis, Theoretical/Opinion | General                               | Marine                | Fisheries, Management               | NA                           | , Management                                    | NA                     |
| 1611            | NA       | NA                          | NA                                        | Review/MetaAnalysis                      | General, Other_fish, Salmonid_general | Egg                   | Temperature_FW                      | Morphology, Phenology        | Environment, , Management                       | Demography, Physiology |
| 1612            | 10plus   | Largescale                  | NA                                        | Field/RemoteSensing                      | O. kisutch                            | Marine                | Habitat, Temperature_FW             | Mortality, Productivity      | Environment, , Management                       | Demography             |
| 1613            | 1        | Asia_other                  | NA                                        | Lab/Experimental                         | O. mykiss                             | Juvenile, Upmigration | Contaminants, Temperature_FW        | Physiology_Condition         | Environment, , Management                       | Physiology             |
| 1614            | 10plus   | Northwest                   | Northwest_Columbia                        | Field/RemoteSensing                      | O. mykiss                             | Marine                | Prey, Temperature_marine            | Growth, Physiology_Condition | Species_interactions, Environment, , Management | Physiology             |
| 1615            | 10plus   | California                  | California_CV, California_N, California_S | Field/RemoteSensing                      | O. tshawytscha                        | Marine                | Prey, Temperature_marine            | Mortality, Productivity      | Species_interactions, Environment, , Management | Demography             |
| 1616            | 1        | Europe                      | NA                                        | Lab/Experimental                         | S. salar                              | Marine                | Methods                             | Growth                       | Environment, , Management                       | Physiology             |

| Citation number | Duration | Region                | Subregion                                 | Type of study                         | Species        | Life stage                     | Driver                                            | Response                                            | Driver Process                     | Response Process                  |
|-----------------|----------|-----------------------|-------------------------------------------|---------------------------------------|----------------|--------------------------------|---------------------------------------------------|-----------------------------------------------------|------------------------------------|-----------------------------------|
| 1617            | 10plus   | California, Northwest | California_N, Northwest_Coastal           | Field/RemoteSensing                   | General        | Marine                         | Density_Food, Ecosystem, Prey, Temperature_marine | NA                                                  | Species_interactions, Environment, | NA                                |
| 1618            | 1        | Europe                | NA                                        | Lab/Experimental                      | S. salar       | Marine                         | Acidity, Disease                                  | NA                                                  | Species_interactions, Environment, | NA                                |
| 1619            | 2to5     | Northwest             | Northwest_Puget_Sound                     | Field/RemoteSensing                   | O. mykiss      | Juvenile, Marine, Outmigration | NA                                                | Carryover, Growth, Mortality                        |                                    | Demography, Physiology            |
| 1620            | 2to5     | Northwest             | Northwest_Puget_Sound                     | Field/RemoteSensing                   | O. mykiss      | Juvenile                       | Density_Food, Temperature_FW                      | Carryover, Growth, Mortality                        | Species_interactions, Environment, | Demography, Physiology            |
| 1621            | NA       | California            | California_CV, California_N               | Field/RemoteSensing                   | O. tshawytscha | Spawning                       | Genetics                                          | Genetics_Adaptation, Phenology                      | Evolution,                         | Demography, Evolution             |
| 1622            | 2to5     | Northwest             | Northwest_Columbia                        | Field/RemoteSensing, Lab/Experimental | O. mykiss      | Egg, Juvenile, Spawning        | Temperature_FW                                    | Carryover, Growth, Morphology, Phenology            | Environment,                       | Demography, Physiology            |
| 1623            | 6to10    | Northwest             | California_N, Northwest_Coastal           | Field/RemoteSensing                   | O. tshawytscha | Marine                         | Density_Food, Ecosystem, Predators, Prey          | Growth, Mortality                                   | Species_interactions,              | Demography, Physiology            |
| 1624            | 10plus   | British_Columbia      | British_Columbia_Fraser                   | Field/RemoteSensing                   | O. nerka       | Upmigration                    | Climate_indices, Environment, Temperature_marine  | Phenology, Physiology_Condition                     | Environment,                       | Demography, Physiology            |
| 1625            | 1        | East_North_America    | NA                                        | Lab/Experimental                      | O. tshawytscha | Egg                            | Genetics, Temperature_FW                          | Carryover, Genetics_Adaptation, Growth, Morphology  | Evolution, Environment,            | Demography, Evolution, Physiology |
| 1626            | 1        | East_North_America    | NA                                        | Lab/Experimental                      | O. tshawytscha | Egg                            | Prey                                              | Carryover, Growth, Morphology, Physiology_Condition | Species_interactions,              | Demography, Physiology            |
| 1627            | NA       | California            | California_CV, California_N, California_S | Model, Projections/physical           | General        | Freshwater_habitat             | Flow, Management                                  | NA                                                  | Environment, , Management          | NA                                |
| 1628            | NA       | NA                    | NA                                        | Theoretical/Opinion                   | General        | Freshwater_habitat             | Management, Restoration                           | NA                                                  | , Management                       | NA                                |

| Citation number | Duration | Region             | Subregion             | Type of study                                                                | Species          | Life stage                             | Driver                                  | Response                                                   | Driver Process                        | Response Process                        |
|-----------------|----------|--------------------|-----------------------|------------------------------------------------------------------------------|------------------|----------------------------------------|-----------------------------------------|------------------------------------------------------------|---------------------------------------|-----------------------------------------|
| 1629            | NA       | NA                 | NA                    | Review/<br>MetaAnalysis                                                      | General          | Population                             | Density_Food                            | Growth, Life_history,<br>Productivity                      | Species_interactions,                 | Demography,<br>Physiology               |
| 1630            | 10plus   | Northwest          | Northwest_Columbia    | Field/<br>RemoteSensing                                                      | O. tshawytscha   | Egg, Juvenile                          | Density_Food,<br>Habitat                | Habitat_Distribution,<br>Productivity                      | Species_interactions,<br>Environment, | Dispersal,<br>Demography                |
| 1631            | 1        | Europe             | NA                    | Lab/<br>Experimental                                                         | S. salar         | Juvenile,<br>Marine,<br>Outmigration   | Acidity,<br>Contaminants                | Carryover, Growth,<br>Mortality,<br>Physiology_Condition   | Environment,                          | Demography,<br>Physiology               |
| 1632            | 1        | East_North_America | NA                    | Lab/<br>Experimental                                                         | O. tshawytscha   | Evolution,<br>Juvenile,<br>Upmigration | Genetics                                | Genetics_Adaptation,<br>Phenology,<br>Physiology_Condition | Evolution*,                           | Demography,<br>Evolution,<br>Physiology |
| 1633            | 10plus   | Northwest          | Northwest_Columbia    | Field/<br>RemoteSensing                                                      | O. tshawytscha   | Population,<br>Spawning                | Methods                                 | Productivity                                               |                                       | Demography                              |
| 1634            | NA       | Northwest          | Northwest_Puget_Sound | Field/<br>RemoteSensing,<br>Lab/<br>Experimental,<br>Review/<br>MetaAnalysis | O. kisutch       | Upmigration                            | Contaminants                            | Mortality                                                  | Environment,                          | Demography                              |
| 1635            | 2to5     | Northwest          | Northwest_Columbia    | Field/<br>RemoteSensing                                                      | O. tshawytscha   | Juvenile,<br>Outmigration              | Habitat,<br>Management                  | Habitat_Distribution                                       | Environment, ,<br>Management          | Dispersal                               |
| 1636            | 2to5     | Northwest          | Northwest_Columbia    | Field/<br>RemoteSensing                                                      | O. tshawytscha   | Juvenile                               | Habitat                                 | Behaviour,<br>Habitat_Distribution                         | Environment,                          | Dispersal                               |
| 1637            | NA       | Northwest          | Northwest_Columbia    | Review/<br>MetaAnalysis                                                      | O. tshawytscha   | Population                             | Management                              | Population_resilience,<br>Productivity                     | , Management                          | Demography                              |
| 1638            | 10plus   | Alaska             | Alaska_W              | Field/<br>RemoteSensing                                                      | O. nerka         | Spawning,<br>Upmigration               | Density_Food,<br>Dissolved_oxygen, Flow | Mortality                                                  | Species_interactions,<br>Environment, | Demography                              |
| 1639            | NA       | NA                 | NA                    | Theoretical/<br>Opinion                                                      | General          | Juvenile,<br>Spawning,<br>Upmigration  | Fisheries                               | Genetics_Adaptation,<br>Mortality, Phenology               | , Management                          | Demography,<br>Evolution                |
| 1640            | 10plus   | Northwest          | Northwest_Puget_Sound | Field/<br>RemoteSensing                                                      | O. nerka         | Juvenile,<br>Spawning,<br>Upmigration  | Genetics,<br>Management                 | Genetics_Adaptation,<br>Phenology                          | Evolution, ,<br>Management            | Demography,<br>Evolution                |
| 1641            | NA       | NA                 | NA                    | Review/<br>MetaAnalysis                                                      | Salmonid_general | Upmigration                            | Environment,<br>Habitat,<br>Management  | Phenology                                                  | Environment, ,<br>Management          | Demography                              |
| 1642            | 10plus   | East_North_America | NA                    | Field/<br>RemoteSensing                                                      | S. salar         | Marine                                 | NA                                      | Growth, Maturation,<br>Mortality, Productivity             |                                       | Demography,<br>Physiology               |

| Citation number | Duration | Region                   | Subregion                                               | Type of study                                       | Species                                         | Life stage                                      | Driver                                             | Response                                                                      | Driver Process                                        | Response Process          |
|-----------------|----------|--------------------------|---------------------------------------------------------|-----------------------------------------------------|-------------------------------------------------|-------------------------------------------------|----------------------------------------------------|-------------------------------------------------------------------------------|-------------------------------------------------------|---------------------------|
| 1643            | NA       | NA                       | NA                                                      | Review/<br>MetaAnalysis                             | General,<br>Other_fish,<br>Salmonid_<br>general | Freshwater_ha<br>bitat                          | Habitat,<br>Restoration,<br>Temperature_<br>FW     | NA                                                                            | Environment, ,<br>Management                          | NA                        |
| 1644            | 1        | East_North_A<br>merica   | NA                                                      | Field/<br>RemoteSensing                             | General,<br>Other_fish                          | Freshwater_ha<br>bitat                          | Habitat,<br>Restoration,<br>Temperature_<br>FW     | NA                                                                            | Environment, ,<br>Management                          | NA                        |
| 1645            | NA       | NA                       | NA                                                      | Review/<br>MetaAnalysis                             | General                                         | General                                         | Ecosystem,<br>Environment,<br>Management           | Population_resilience                                                         | Species_interactions,<br>Environment, ,<br>Management | Demography                |
| 1646            | 10plus   | Europe                   | NA                                                      | Field/<br>RemoteSensing                             | S. salar                                        | Juvenile,<br>Marine,<br>Population,<br>Spawning | Temperature_<br>marine                             | Carryover, Life_history,<br>Maturation,<br>Phenology,<br>Physiology_Condition | Environment,                                          | Demography,<br>Physiology |
| 1647            | 10plus   | Europe                   | NA                                                      | Field/<br>RemoteSensing                             | S. salar                                        | Marine                                          | Temperature_<br>marine                             | Growth                                                                        | Environment,                                          | Physiology                |
| 1648            | NA       | Northwest                | NA                                                      | Model,<br>Projections/<br>physical                  | General                                         | Freshwater_ha<br>bitat                          | Flow                                               | NA                                                                            | Environment,                                          | NA                        |
| 1649            | 6to10    | Northwest                | Northwest_Col<br>umbia                                  | Field/<br>RemoteSensing                             | O. tshawytscha                                  | Juvenile,<br>Marine                             | Density_Food,<br>Prey                              | Growth, Mortality                                                             | Species_interactions,                                 | Demography,<br>Physiology |
| 1650            | NA       | California,<br>Northwest | California_N,<br>California_S,<br>Northwest_Co<br>astal | Model, Review/<br>MetaAnalysis                      | General                                         | Marine                                          | Ecosystem,<br>Management,<br>Methods               | NA                                                                            | Species_interactions,<br>, Management                 | NA                        |
| 1651            | NA       | Europe                   | NA                                                      | Field/<br>RemoteSensing                             | S. salar                                        | Evolution,<br>Juvenile                          | Disease                                            | Genetics_Adaptation,<br>Immune                                                | Species_interactions,                                 | Evolution,<br>Physiology  |
| 1652            | NA       | California               | California_N                                            | Field/<br>RemoteSensing                             | O. kisutch                                      | Juvenile                                        | Environment,<br>Flow, Habitat,<br>Management       | Population_resilience                                                         | Environment, ,<br>Management                          | Demography                |
| 1653            | NA       | Alaska                   | Alaska_S                                                | Review/<br>MetaAnalysis,<br>Theoretical/<br>Opinion | Salmonid_<br>general                            | Population                                      | Ecosystem,<br>Fisheries,<br>Management,<br>Methods | Population_resilience                                                         | Species_interactions,<br>, Management                 | Demography                |
| 1654            | 10plus   | Europe                   | NA                                                      | Model                                               | General                                         | General                                         | Methods                                            | Growth                                                                        |                                                       | Physiology                |

| Citation number | Duration | Region             | Subregion                                            | Type of study              | Species                           | Life stage            | Driver                                        | Response                                      | Driver Process                                | Response Process                   |
|-----------------|----------|--------------------|------------------------------------------------------|----------------------------|-----------------------------------|-----------------------|-----------------------------------------------|-----------------------------------------------|-----------------------------------------------|------------------------------------|
| 1655            | 2to5     | Mountain_west      | NA                                                   | Lab/Experimental           | O. clarkii, O. mykiss, Other_fish | Juvenile              | Acidity                                       | Mortality                                     | Environment,                                  | Demography                         |
| 1656            | 10plus   | Europe             | NA                                                   | Field/RemoteSensing        | S. salar                          | Marine                | NA                                            | Carryover, Growth, Life_history, Maturation   |                                               | Demography, Physiology             |
| 1657            | 10plus   | Europe             | NA                                                   | Field/RemoteSensing        | S. salar                          | Marine                | Climate_indices, Density_Food, Ecosystem      | Mortality, Productivity                       | Species_interactions, Environment,            | Demography                         |
| 1658            | 10plus   | Northwest          | Northwest_Columbia                                   | Field/RemoteSensing        | O. nerka                          | Marine                | Environment, Flow, Management, Temperature_FW | Population_resilience, Productivity           | Environment, Management                       | Demography                         |
| 1659            | 1        | East_North_America | NA                                                   | Lab/Experimental           | S. fontinalis                     | Juvenile, Upmigration | Contaminants, Temperature_FW                  | Performance                                   | Environment,                                  | Physiology                         |
| 1660            | 1        | Asia_other         | NA                                                   | Lab/Experimental           | Other_fish                        | Spawning              | Temperature_FW                                | Performance, Physiology_Condition             | Environment,                                  | Physiology                         |
| 1661            | 1        | Asia_other         | NA                                                   | Lab/Experimental           | O. mykiss                         | Juvenile              | Density_Food                                  | Growth                                        | Species_interactions,                         | Physiology                         |
| 1662            | 1        | British_Columbia   | British_Columbia_Fraser, British_Columbia_not_Fraser | Field/RemoteSensing        | O. kisutch                        | Egg                   | Habitat, Temperature_FW                       | Habitat_Distribution                          | Environment,                                  | Dispersal                          |
| 1663            | 10plus   | British_Columbia   | British_Columbia_Fraser, British_Columbia_not_Fraser | Field/RemoteSensing        | O. kisutch                        | Egg, Spawning         | Habitat, Temperature_FW                       | Genetics_Adaptation, Life_history, Morphology | Environment,                                  | Demography, Evolution*, Physiology |
| 1664            | 6to10    | California         | California_N                                         | Field/RemoteSensing, Model | O. kisutch, O. tshawytscha        | Juvenile              | Disease, Flow, Management                     | Mortality                                     | Species_interactions, Environment, Management | Demography                         |
| 1665            | 10plus   | Europe             | NA                                                   | Field/RemoteSensing        | S. salar, S. trutta               | Population            | Genetics                                      | Productivity                                  | Evolution*,                                   | Demography                         |

| Citation number | Duration | Region             | Subregion                   | Type of study                                                         | Species                   | Life stage                  | Driver                                                                  | Response                                     | Driver Process                                  | Response Process       |
|-----------------|----------|--------------------|-----------------------------|-----------------------------------------------------------------------|---------------------------|-----------------------------|-------------------------------------------------------------------------|----------------------------------------------|-------------------------------------------------|------------------------|
| 1666            | 1        | East_North_America | NA                          | Field/RemoteSensing                                                   | O. tshawytscha            | Spawning                    | Flow, Temperature_FW                                                    | Behaviour, Performance, Physiology_Condition | Environment,                                    | Dispersal, Physiology  |
| 1667            | 1        | British_Columbia   | British_Columbia_not_Fraser | Field/RemoteSensing                                                   | O. mykiss                 | Upmigration                 | Disease, Flow, Habitat                                                  | Mortality, Performance                       | Species_interactions, Environment,              | Demography, Physiology |
| 1668            | 1        | British_Columbia   | British_Columbia_not_Fraser | Field/RemoteSensing                                                   | O. mykiss                 | Upmigration                 | Fisheries                                                               | Mortality, Performance, Physiology_Condition | , Management                                    | Demography, Physiology |
| 1669            | NA       | Northwest          | Northwest_Columbia          | Review/MetaAnalysis                                                   | General                   | Freshwater_habitat          | Flow, Habitat, Management                                               | NA                                           | Environment, , Management                       | NA                     |
| 1670            | NA       | Northwest          | Northwest_Columbia          | Field/RemoteSensing                                                   | O. mykiss, O. tshawytscha | Upmigration                 | Habitat, Temperature_FW                                                 | Habitat_Distribution                         | Environment,                                    | Dispersal              |
| 1671            | 10plus   | Alaska             | Alaska_S                    | Field/RemoteSensing                                                   | O. nerka                  | Juvenile, Outmigration      | Density_Food, Temperature_FW                                            | Growth                                       | Species_interactions, Environment,              | Physiology             |
| 1672            | 1        | Mountain_west      | NA                          | Lab/Experimental                                                      | O. clarkii                | Juvenile                    | Temperature_FW                                                          | Performance                                  | Environment,                                    | Physiology             |
| 1673            | 10plus   | Asia_other         | NA                          | Field/RemoteSensing                                                   | O. keta                   | Marine                      | Climate_indices, Density_Food, Environment, Fisheries                   | Growth, Maturation                           | Species_interactions, Environment, , Management | Physiology             |
| 1674            | NA       | Largescale         | NA                          | Review/MetaAnalysis                                                   | General                   | General                     | Management                                                              | Population_resilience                        | , Management                                    | Demography             |
| 1675            | NA       | Largescale         | NA                          | Field/RemoteSensing, Model, Projections/physical, Review/MetaAnalysis | General                   | Freshwater_habitat, General | Acidity, Dissolved_oxygen, Environment, Fisheries, Flow, Temperature_FW | NA                                           | Environment, , Management                       | NA                     |

| Citation number | Duration | Region             | Subregion          | Type of study           | Species                  | Life stage                             | Driver                                                                        | Response                                                     | Driver Process                        | Response Process                        |
|-----------------|----------|--------------------|--------------------|-------------------------|--------------------------|----------------------------------------|-------------------------------------------------------------------------------|--------------------------------------------------------------|---------------------------------------|-----------------------------------------|
| 1676            | NA       | Largescale         | NA                 | Review/<br>MetaAnalysis | General                  | Freshwater_habitat, General            | Acidity,<br>Dissolved_oxygen,<br>Environment,<br>Fisheries,<br>Temperature_FW | NA                                                           | Environment, ,<br>Management          | NA                                      |
| 1677            | 2to5     | Mountain_west      | NA                 | Field/<br>RemoteSensing | O. clarkii               | Juvenile                               | Flow,<br>Temperature_FW                                                       | Growth                                                       | Environment,                          | Physiology                              |
| 1678            | 10plus   | Europe             | NA                 | Field/<br>RemoteSensing | S. salar                 | Marine                                 | Density_Food,<br>Ecosystem,<br>Prey                                           | Growth,<br>Physiology_Condition                              | Species_interactions,                 | Physiology                              |
| 1679            | 10plus   | Europe             | NA                 | Field/<br>RemoteSensing | S. salar                 | Marine                                 | Density_Food,<br>Ecosystem,<br>Prey                                           | Growth, Mortality                                            | Species_interactions,                 | Demography,<br>Physiology               |
| 1680            | 10plus   | Europe             | NA                 | Field/<br>RemoteSensing | S. salar                 | Evolution,<br>Juvenile,<br>Population  | Genetics,<br>Management                                                       | Life_history,<br>Maturation                                  | Evolution, ,<br>Management            | Demography,<br>Physiology               |
| 1681            | 1        | East_North_America | NA                 | Field/<br>RemoteSensing | S. fontinalis, S. trutta | Juvenile                               | Habitat,<br>Temperature_FW                                                    | Habitat_Distribution                                         | Environment,                          | Dispersal                               |
| 1682            | 10plus   | Europe             | NA                 | Field/<br>RemoteSensing | S. salar                 | Evolution,<br>Spawning,<br>Upmigration | Climate_indices, Genetics                                                     | Genetics_Adaptation,<br>Maturation,<br>Population_resilience | Evolution,<br>Environment,            | Demography,<br>Evolution,<br>Physiology |
| 1683            | NA       | NA                 | NA                 | Theoretical/<br>Opinion | General                  | General                                | Environment                                                                   | NA                                                           | Environment,                          | NA                                      |
| 1684            | 2to5     | Europe             | NA                 | Lab/<br>Experimental    | Other_species            | Juvenile                               | Genetics,<br>Temperature_FW                                                   | Genetics_Adaptation,<br>Performance                          | Evolution,<br>Environment,            | Evolution,<br>Physiology                |
| 1685            | NA       | Europe             | NA                 | Lab/<br>Experimental    | Other_species            | Juvenile                               | Genetics,<br>Temperature_FW                                                   | Genetics_Adaptation,<br>Performance                          | Evolution,<br>Environment,            | Evolution,<br>Physiology                |
| 1686            | 2to5     | Europe             | NA                 | Lab/<br>Experimental    | Other_species            | Juvenile                               | Genetics,<br>Temperature_FW                                                   | Genetics_Adaptation,<br>Performance                          | Evolution,<br>Environment,            | Evolution,<br>Physiology                |
| 1687            | 2to5     | Northwest          | Northwest_Columbia | Field/<br>RemoteSensing | O. tshawytscha           | Juvenile                               | Density_Food,<br>Temperature_FW                                               | Behaviour                                                    | Species_interactions,<br>Environment, | Dispersal                               |



| Citation number | Duration | Region                     | Subregion                   | Type of study                   | Species        | Life stage              | Driver                             | Response                                | Driver Process          | Response Process                  |
|-----------------|----------|----------------------------|-----------------------------|---------------------------------|----------------|-------------------------|------------------------------------|-----------------------------------------|-------------------------|-----------------------------------|
| 1688            | 10plus   | California                 | California_N                | Field/<br>RemoteSensing         | O. kisutch     | Freshwater_habitat      | Flow, Management                   | NA                                      | Environment, Management | NA                                |
| 1689            | 6to10    | East_North_America         | NA                          | Field/<br>RemoteSensing         | S. salar       | Upmigration             | Fisheries, Flow, Temperature_FW    | Mortality, Physiology_Condition         | Environment, Management | Demography, Physiology            |
| 1690            | NA       | East_North_America, Europe | NA                          | Review/<br>MetaAnalysis         | S. salar       | Upmigration             | Fisheries, Temperature_FW          | Mortality                               | Environment, Management | Demography                        |
| 1691            | 6to10    | California                 | California_N                | Field/<br>RemoteSensing         | O. kisutch     | Juvenile                | Flow, Habitat                      | NA                                      | Environment,            | NA                                |
| 1692            | NA       | Northwest                  | Northwest_Columbia          | Model, Projections/<br>physical | General        | Freshwater_habitat      | Flow                               | NA                                      | Environment,            | NA                                |
| 1693            | 1        | East_North_America         | NA                          | Lab/<br>Experimental            | S. salar       | Marine, Outmigration    | Temperature_FW, Temperature_marine | Performance, Physiology_Condition       | Environment,            | Physiology                        |
| 1694            | 2to5     | Alaska                     | Alaska_W                    | Field/<br>RemoteSensing         | O. keta        | Juvenile, Marine        | NA                                 | Growth, Habitat_Distribution, Phenology |                         | Dispersal, Demography, Physiology |
| 1695            | 2to5     | Europe                     | NA                          | Field/<br>RemoteSensing         | S. salar       | Juvenile, Upmigration   | Habitat, Management                | Behaviour                               | Environment, Management | Dispersal                         |
| 1696            | 1        | Australia_New Zealand      | NA                          | Lab/<br>Experimental            | Other_fish     | Marine                  | Genetics, Temperature_FW           | Genetics_Adaptation, Performance        | Evolution, Environment, | Evolution, Physiology             |
| 1697            | 1        | British_Columbia           | British_Columbia_not_Fraser | Lab/<br>Experimental            | O. tshawytscha | Egg, Juvenile, Spawning | Genetics                           | Carryover, Genetics_Adaptation          | Evolution,              | Demography, Evolution             |
| 1698            | 1        | Northwest                  | Northwest_Columbia          | Field/<br>RemoteSensing, Model  | General        | Freshwater_habitat      | Flow, Habitat, Restoration         | NA                                      | Environment, Management | NA                                |
| 1699            | 1        | California                 | California_CV               | Lab/<br>Experimental            | O. mykiss      | Evolution, Juvenile     | Genetics, Temperature_FW           | Genetics_Adaptation, Performance        | Evolution, Environment, | Evolution, Physiology             |
| 1700            | NA       | South_America              | NA                          | Projections/<br>salmon          | O. mykiss      | Freshwater_habitat      | Habitat, Temperature_FW            | Habitat_Distribution                    | Environment,            | Dispersal                         |

| Citation number | Duration | Region             | Subregion                           | Type of study           | Species                   | Life stage                              | Driver                                                                  | Response                               | Driver Process                        | Response Process          |
|-----------------|----------|--------------------|-------------------------------------|-------------------------|---------------------------|-----------------------------------------|-------------------------------------------------------------------------|----------------------------------------|---------------------------------------|---------------------------|
| 1701            | 1        | Europe             | NA                                  | Lab/<br>Experimental    | S. salar                  | Marine,<br>Outmigration                 | Dissolved_oxygen,<br>Temperature_marine                                 | Growth,<br>Physiology_Condition        | Environment,                          | Physiology                |
| 1702            | 1        | East_North_America | NA                                  | Field/<br>RemoteSensing | S. salar                  | Evolution                               | Genetics,<br>Habitat,<br>Temperature_FW                                 | Genetics_Adaptation                    | Evolution,<br>Environment,            | Evolution                 |
| 1703            | NA       | NA                 | NA                                  | Model                   | General                   | Population                              | Methods                                                                 | Population_resilience,<br>Productivity |                                       | Demography                |
| 1704            | NA       | California         | California_CV                       | Field/<br>RemoteSensing | O. tshawytscha            | Juvenile                                | Flow,<br>Temperature_FW                                                 | Mortality                              | Environment,                          | Demography                |
| 1705            | 2to5     | Alaska             | Alaska_W                            | Field/<br>RemoteSensing | Other_species             | Marine                                  | NA                                                                      | Habitat_Distribution                   |                                       | Dispersal                 |
| 1706            | NA       | Europe             | NA                                  | Model                   | S. salar                  | Marine,<br>Outmigration,<br>Upmigration | Disease                                                                 | Growth, Mortality                      | Species_interactions,                 | Demography,<br>Physiology |
| 1707            | NA       | Europe             | NA                                  | Theoretical/<br>Opinion | S. salar                  | Marine                                  | Disease,<br>Management                                                  | Population_resilience                  | Species_interactions,<br>, Management | Demography                |
| 1708            | 10plus   | Alaska             | Alaska_W                            | Field/<br>RemoteSensing | O. nerka,<br>Other_fish   | Juvenile                                | Density_Food,<br>Environment,<br>Temperature_FW                         | Growth                                 | Species_interactions,<br>Environment, | Physiology                |
| 1709            | 10plus   | Largescale         | NA                                  | Field/<br>RemoteSensing | General,<br>Other_species | Marine                                  | Climate_indices,<br>Density_Food,<br>Environment,<br>Temperature_marine | NA                                     | Species_interactions,<br>Environment, | NA                        |
| 1710            | 2to5     | Alaska             | Alaska_W                            | Field/<br>RemoteSensing | O. tshawytscha            | Upmigration                             | Temperature_FW                                                          | Physiology_Condition                   | Environment,                          | Physiology                |
| 1711            | 2to5     | Alaska             | Alaska_S                            | Field/<br>RemoteSensing | Other_fish                | Marine                                  | Density_Food,<br>Ecosystem,<br>Temperature_marine                       | NA                                     | Species_interactions,<br>Environment, | NA                        |
| 1712            | NA       | Alaska             | Alaska_S,<br>Alaska_SE,<br>Alaska_W | Theoretical/<br>Opinion | General                   | Freshwater_habitat                      | Habitat,<br>Management                                                  | NA                                     | Environment, ,<br>Management          | NA                        |

| Citation number | Duration | Region    | Subregion                                 | Type of study                                  | Species          | Life stage                  | Driver                                                                           | Response                | Driver Process                                  | Response Process |
|-----------------|----------|-----------|-------------------------------------------|------------------------------------------------|------------------|-----------------------------|----------------------------------------------------------------------------------|-------------------------|-------------------------------------------------|------------------|
| 1713            | NA       | Northwest | Northwest_Columbia                        | Field/RemoteSensing, Model, Projections/salmon | O. mykiss        | Evolution, Population       | Flow, Habitat, Temperature_FW                                                    | Population_resilience   | Environment,                                    | Demography       |
| 1714            | NA       | Northwest | Northwest_Columbia, Northwest_Puget_Sound | Model, Projections/salmon                      | O. mykiss        | Population                  | Flow, Habitat, Management, Temperature_FW                                        | Population_resilience   | Environment, , Management                       | Demography       |
| 1715            | NA       | NA        | NA                                        | Model                                          | General          | Freshwater_habitat          | Ecosystem                                                                        | NA                      | Species_interactions,                           | NA               |
| 1716            | NA       | Northwest | Northwest_Columbia                        | Model, Projections/physical                    | General          | Freshwater_habitat          | Flow                                                                             | NA                      | Environment,                                    | NA               |
| 1717            | 10plus   | Northwest | Northwest_Columbia                        | Field/RemoteSensing                            | O. kisutch       | Marine, Population          | Climate_indices, Ecosystem, Environment, Management, Methods, Temperature_marine | Mortality, Productivity | Species_interactions, Environment, , Management | Demography       |
| 1718            | NA       | Northwest | Northwest_Columbia                        | Review/MetaAnalysis                            | O. kisutch       | Freshwater_habitat, General | Environment, Flow, Habitat, Temperature_FW, Temperature_marine                   | Population_resilience   | Environment,                                    | Demography       |
| 1719            | 1        | Northwest | Northwest_Puget_Sound                     | Field/RemoteSensing                            | General          | Juvenile                    | Density_Food, Ecosystem, Environment, Habitat                                    | NA                      | Species_interactions, Environment,              | NA               |
| 1720            | 6to10    | Europe    | NA                                        | Field/RemoteSensing                            | S. trutta        | General                     | Disease                                                                          | Population_resilience   | Species_interactions,                           | Demography       |
| 1721            | NA       | Alaska    | Alaska_S                                  | Field/RemoteSensing                            | Salmonid_general | Freshwater_habitat          | Ecosystem, Habitat, Management                                                   | Livelihood              | Species_interactions, Environment, , Management | Management       |

| Citation number | Duration | Region           | Subregion                                            | Type of study                                  | Species                                         | Life stage  | Driver                                         | Response                                                 | Driver Process                     | Response Process                  |
|-----------------|----------|------------------|------------------------------------------------------|------------------------------------------------|-------------------------------------------------|-------------|------------------------------------------------|----------------------------------------------------------|------------------------------------|-----------------------------------|
| 1722            | 2to5     | Mountain_west    | NA                                                   | Field/RemoteSensing                            | O. clarkii, Other_fish                          | Juvenile    | Environment, Temperature_FW                    | Physiology_Condition                                     | Environment,                       | Physiology                        |
| 1723            | NA       | NA               | NA                                                   | Review/MetaAnalysis                            | Salmonid_general                                | General     | Density_Food, Ecosystem, Management, Predators | NA                                                       | Species_interactions, , Management | NA                                |
| 1724            | 10plus   | Alaska           | Alaska_W                                             | Field/RemoteSensing                            | O. kisutch                                      | Upmigration | Climate_indices                                | Phenology                                                | Environment,                       | Demography                        |
| 1725            | 10plus   | Mountain_west    | NA                                                   | Field/RemoteSensing                            | Other_fish                                      | Juvenile    | Flow, Management                               | Habitat_Distribution                                     | Environment, , Management          | Dispersal                         |
| 1726            | 6to10    | Alaska           | Alaska_S                                             | Field/RemoteSensing                            | O. nerka                                        | Juvenile    | Habitat, Temperature_FW                        | Behaviour, Carryover, Habitat_Distribution, Productivity | Environment,                       | Dispersal, Demography             |
| 1727            | 10plus   | Northwest        | Northwest_Columbia                                   | Field/RemoteSensing, Model, Projections/salmon | O. tshawytscha                                  | Juvenile    | Flow, Management, Temperature_FW               | Mortality                                                | Environment, , Management          | Demography                        |
| 1728            | 10plus   | British_Columbia | British_Columbia_Fraser, British_Columbia_not_Fraser | Field/RemoteSensing                            | O. gorbuscha, O. keta, O. nerka, O. tshawytscha | Marine      | Fisheries, Management                          | Mortality, Population_resilience, Productivity           | , Management                       | Demography                        |
| 1729            | NA       | Alaska           | Alaska_W                                             | Model, Projections/physical                    | General                                         | Marine      | Environment, Temperature_marine                | NA                                                       | Environment,                       | NA                                |
| 1730            | 10plus   | Alaska           | Alaska_W                                             | Model, Projections/physical                    | General                                         | Marine      | Environment, Temperature_marine                | NA                                                       | Environment,                       | NA                                |
| 1731            | 1        | California       | California_N                                         | Field/RemoteSensing                            | O. mykiss                                       | Juvenile    | Habitat, Temperature_FW                        | Habitat_Distribution                                     | Environment,                       | Dispersal                         |
| 1732            | 2to5     | Northwest        | Northwest_Columbia                                   | Field/RemoteSensing                            | O. tshawytscha                                  | Juvenile    | Genetics, Management                           | Growth, Life_history, Phenology                          | Evolution, , Management            | Demography, Physiology            |
| 1733            | NA       | NA               | NA                                                   | Theoretical/Opinion                            | General                                         | Evolution   | Fisheries, Genetics                            | Genetics_Adaptation, Life_history, Maturation            | Evolution, , Management            | Demography, Evolution, Physiology |

| Citation number | Duration | Region             | Subregion             | Type of study                         | Species                                | Life stage                          | Driver                                                                 | Response                                                     | Driver Process                     | Response Process                  |
|-----------------|----------|--------------------|-----------------------|---------------------------------------|----------------------------------------|-------------------------------------|------------------------------------------------------------------------|--------------------------------------------------------------|------------------------------------|-----------------------------------|
| 1734            | 10plus   | Northwest          | Northwest_Columbia    | Field/RemoteSensing                   | General                                | Freshwater_habitat                  | Flow, Habitat                                                          | NA                                                           | Environment,                       | NA                                |
| 1735            | 10plus   | Northwest          | Northwest_Puget_Sound | Field/RemoteSensing                   | O. tshawytscha                         | Egg, Juvenile, Population, Spawning | Climate_indices, Flow                                                  | Mortality, Productivity                                      | Environment,                       | Demography                        |
| 1736            | 10plus   | Alaska             | Alaska_S              | Field/RemoteSensing                   | O. gorbuscha, O. nerka, O. tshawytscha | Marine                              | Contaminants, Density_Food, Ecosystem, Environment, Temperature_marine | Productivity                                                 | Species_interactions, Environment, | Demography                        |
| 1737            | 2to5     | British_Columbia   | NA                    | Field/RemoteSensing                   | O. mykiss                              | Juvenile                            | Density_Food, Temperature_FW                                           | Growth, Maturation                                           | Species_interactions, Environment, | Physiology                        |
| 1738            | 10plus   | Northwest          | Northwest_Puget_Sound | Field/RemoteSensing                   | O. tshawytscha                         | Marine                              | Methods, Predators                                                     | Mortality                                                    | Species_interactions,              | Demography                        |
| 1739            | NA       | Mountain_west      | NA                    | Field/RemoteSensing                   | S. confluentus, S. fontinalis          | Juvenile                            | Invasives, Temperature_FW                                              | Habitat_Distribution                                         | Species_interactions, Environment, | Dispersal                         |
| 1740            | 10plus   | East_North_America | NA                    | Field/RemoteSensing                   | S. fontinalis                          | Spawning                            | Temperature_FW                                                         | Performance, Phenology                                       | Environment,                       | Demography, Physiology            |
| 1741            | 1        | East_North_America | NA                    | Lab/Experimental                      | O. tshawytscha                         | Egg, Juvenile                       | Temperature_FW                                                         | Growth, Mortality, Physiology_Condition                      | Environment,                       | Demography, Physiology            |
| 1742            | 1        | East_North_America | NA                    | Lab/Experimental                      | O. tshawytscha                         | Egg, Juvenile                       | Temperature_FW                                                         | Carryover, Performance, Physiology_Condition                 | Environment,                       | Demography, Physiology            |
| 1743            | 10plus   | California         | California_N          | Field/RemoteSensing                   | Other_fish, Other_species              | Marine                              | Density_Food, Predators                                                | Mortality                                                    | Species_interactions,              | Demography                        |
| 1744            | NA       | Largescale         | NA                    | Review/MetaAnalysis                   | General                                | Marine                              | Ecosystem, Environment                                                 | NA                                                           | Species_interactions, Environment, | NA                                |
| 1745            | 10plus   | Alaska, Japan      | Alaska_W              | Field/RemoteSensing                   | O. gorbuscha, O. keta                  | Marine                              | Density_Food, Prey                                                     | Productivity                                                 | Species_interactions,              | Demography                        |
| 1746            | 1        | Northwest          | Northwest_Columbia    | Field/RemoteSensing                   | O. mykiss                              | Upmigration                         | Habitat, Methods                                                       | Behaviour, Habitat_Distribution, Mortality                   | Environment,                       | Dispersal, Demography             |
| 1747            | 2to5     | Northwest          | Northwest_Columbia    | Field/RemoteSensing, Lab/Experimental | O. tshawytscha                         | Spawning                            | Genetics, Management                                                   | Genetics_Adaptation, Growth, Mortality, Physiology_Condition | Evolution, , Management            | Demography, Evolution, Physiology |

| Citation number | Duration | Region             | Subregion                   | Type of study       | Species                      | Life stage                  | Driver                                 | Response                     | Driver Process                                  | Response Process       |
|-----------------|----------|--------------------|-----------------------------|---------------------|------------------------------|-----------------------------|----------------------------------------|------------------------------|-------------------------------------------------|------------------------|
| 1748            | 2to5     | East_North_America | NA                          | Field/RemoteSensing | S. salar                     | Population                  | Environment, Genetics, Habitat         | Genetics_Adaptation          | Evolution, Environment,                         | Evolution              |
| 1749            | NA       | NA                 | NA                          | Review/MetaAnalysis | S. salar                     | General                     | Ecosystem, Fisheries, Flow, Management | Livelihood                   | Species_interactions, Environment, , Management | Management             |
| 1750            | 1        | Japan              | NA                          | Lab/Experimental    | S. malma                     | Juvenile                    | Density_Food, Habitat, Temperature_FW  | Growth, Habitat_Distribution | Species_interactions, Environment,              | Dispersal, Physiology  |
| 1751            | NA       | NA                 | NA                          | Review/MetaAnalysis | Other_fish, Salmonid_general | Juvenile                    | Flow, Habitat, Temperature_FW          | Habitat_Distribution         | Environment,                                    | Dispersal              |
| 1752            | 10plus   | Europe             | NA                          | Field/RemoteSensing | Other_fish                   | Spawning                    | Temperature_FW                         | Mortality, Phenology         | Environment,                                    | Demography             |
| 1753            | 2to5     | East_North_America | NA                          | Field/RemoteSensing | O. mykiss                    | Juvenile                    | Fisheries, Habitat, Temperature_FW     | Habitat_Distribution         | Environment, , Management                       | Dispersal              |
| 1754            | 1        | British_Columbia   | British_Columbia_not_Fraser | Field/RemoteSensing | O. tshawytscha               | Marine                      | Disease                                | NA                           | Species_interactions,                           | NA                     |
| 1755            | 10plus   | Northwest          | Northwest_Puget_Sound       | Field/RemoteSensing | O. keta                      | Egg, Juvenile, Outmigration | Flow, Temperature_FW                   | Mortality, Phenology         | Environment,                                    | Demography             |
| 1756            | 2to5     | East_North_America | NA                          | Field/RemoteSensing | S. trutta                    | Evolution                   | Genetics, Management                   | Genetics_Adaptation          | Evolution, , Management                         | Evolution              |
| 1757            | 10plus   | Largescale         | NA                          | Field/RemoteSensing | O. tshawytscha               | Marine                      | Fisheries, Habitat                     | Habitat_Distribution         | Environment, , Management                       | Dispersal              |
| 1758            | 2to5     | Northwest          | Northwest_Columbia          | Field/RemoteSensing | O. mykiss, O. tshawytscha    | Marine, Outmigration        | Genetics, Management                   | Growth, Phenology            | Evolution* , Management                         | Demography, Physiology |

| Citation number | Duration | Region                                  | Subregion                                                                                                                         | Type of study                            | Species                          | Life stage         | Driver                                                       | Response                | Driver Process                     | Response Process       |
|-----------------|----------|-----------------------------------------|-----------------------------------------------------------------------------------------------------------------------------------|------------------------------------------|----------------------------------|--------------------|--------------------------------------------------------------|-------------------------|------------------------------------|------------------------|
| 1759            | 10plus   | British_Columbia, California, Northwest | British_Columbia_Fraser, British_Columbia_not_Fraser, California_CV, Northwest_Coastal, Northwest_Columbia, Northwest_Puget_Sound | Field/RemoteSensing                      | O. tshawytscha                   | Marine, Population | Management, Methods, Restoration                             | Mortality, Productivity | , Management                       | Demography             |
| 1760            | 1        | British_Columbia                        | British_Columbia_not_Fraser                                                                                                       | Field/RemoteSensing                      | O. mykiss                        | Evolution          | Genetics, Habitat, Temperature_FW                            | Genetics_Adaptation     | Evolution, Environment,            | Evolution              |
| 1761            | 1        | British_Columbia                        | British_Columbia_not_Fraser                                                                                                       | Field/RemoteSensing, Lab/Experimental    | O. mykiss                        | Evolution          | Genetics, Habitat                                            | Genetics_Adaptation     | Evolution, Environment,            | Evolution              |
| 1762            | NA       | California                              | California_CV                                                                                                                     | Review/MetaAnalysis, Theoretical/Opinion | O. tshawytscha, Salmonid_general | Marine             | Ecosystem, Management                                        | Population_resilience   | Species_interactions, Management   | Demography             |
| 1763            | 10plus   | California                              | California_CV, California_N, California_S                                                                                         | Field/RemoteSensing                      | O. kisutch, O. tshawytscha       | Marine             | Density_Food, Environment, Temperature_marine                | Growth, Mortality       | Species_interactions, Environment, | Demography, Physiology |
| 1764            | NA       | California                              | California_CV, California_N                                                                                                       | Review/MetaAnalysis                      | O. tshawytscha                   | Marine             | Climate_indices, Density_Food, Ecosystem, Temperature_marine | Growth, Mortality       | Species_interactions, Environment, | Demography, Physiology |
| 1765            | 10plus   | California                              | California_N                                                                                                                      | Field/RemoteSensing                      | O. tshawytscha                   | Marine             | Density_Food, Ecosystem, Predators                           | Mortality               | Species_interactions,              | Demography             |

| Citation number | Duration | Region           | Subregion                              | Type of study                         | Species                              | Life stage           | Driver                                   | Response                                        | Driver Process                     | Response Process       |
|-----------------|----------|------------------|----------------------------------------|---------------------------------------|--------------------------------------|----------------------|------------------------------------------|-------------------------------------------------|------------------------------------|------------------------|
| 1766            | 10plus   | Northwest        | Northwest_Columbia, Northwest_Columbia | Field/RemoteSensing, Model            | General                              | Freshwater_habitat   | Flow, Methods                            | NA                                              | Environment,                       | NA                     |
| 1767            | NA       | Mountain_west    | NA                                     | Model, Projections/salmon             | O. clarkii, S. fontinalis, S. trutta | Juvenile, Population | Flow, Habitat, Invasives, Temperature_FW | Habitat_Distribution, Population_resilience     | Species_interactions, Environment, | Dispersal, Demography  |
| 1768            | NA       | Northwest        | Northwest_Columbia                     | Model, Projections/salmon             | S. confluentus                       | General              | Flow, Habitat, Temperature_FW            | Habitat_Distribution, Population_resilience     | Environment,                       | Dispersal, Demography  |
| 1769            | 1        | Alaska           | Alaska_W                               | Field/RemoteSensing                   | O. keta                              | Upmigration          | Disease, Temperature_FW                  | Mortality, Phenology                            | Species_interactions, Environment, | Demography             |
| 1770            | 10plus   | Alaska           | Alaska_W                               | Field/RemoteSensing                   | O. nerka                             | General, Population  | Ecosystem                                | Productivity                                    | Species_interactions,              | Demography             |
| 1771            | NA       | Alaska           | Alaska_S, Alaska_SE, Alaska_W          | Review/MetaAnalysis                   | Salmonid_general                     | General              | Fisheries, Management                    | Livelihood, Population_resilience               | , Management                       | Demography, Management |
| 1772            | 10plus   | Largescale       | NA                                     | Model                                 | O. nerka                             | Population           | NA                                       | Maturation, Population_resilience, Productivity |                                    | Demography, Physiology |
| 1773            | NA       | Northwest        | Northwest_Columbia                     | Review/MetaAnalysis                   | Salmonid_general                     | Freshwater_habitat   | Habitat, Restoration                     | Population_resilience                           | Environment, , Management          | Demography             |
| 1774            | 1        | British_Columbia | British_Columbia_Fraser                | Lab/Experimental                      | O. nerka                             | Egg, Upmigration     | Genetics, Temperature_FW                 | Genetics_Adaptation, Mortality                  | Evolution, Environment,            | Demography, Evolution  |
| 1775            | 1        | British_Columbia | British_Columbia_Fraser                | Field/RemoteSensing, Lab/Experimental | O. nerka                             | Egg, Juvenile        | Temperature_FW                           | Genetics_Adaptation, Mortality, Phenology       | Environment,                       | Demography, Evolution  |
| 1776            | 2to5     | Northwest        | Northwest_Columbia                     | Field/RemoteSensing                   | O. mykiss                            | Upmigration          | Fisheries, Temperature_FW                | Mortality                                       | Environment, , Management          | Demography             |



| Citation number | Duration | Region                               | Subregion                   | Type of study       | Species                 | Life stage                  | Driver                                                                      | Response                                    | Driver Process                                | Response Process      |
|-----------------|----------|--------------------------------------|-----------------------------|---------------------|-------------------------|-----------------------------|-----------------------------------------------------------------------------|---------------------------------------------|-----------------------------------------------|-----------------------|
| 1777            | NA       | Northwest                            | Northwest_Columbia          | Model               | General                 | Freshwater_habitat          | Density_Food, Environment, Habitat, Management, Restoration, Temperature_FW | NA                                          | Species_interactions, Environment, Management | NA                    |
| 1778            | NA       | NA                                   | NA                          | Review/MetaAnalysis | General                 | General, Population         | Ecosystem                                                                   | Habitat_Distribution, Population_resilience | Species_interactions,                         | Dispersal, Demography |
| 1779            | 2to5     | East_North_America                   | NA                          | Field/RemoteSensing | S. fontinalis, S. salar | Juvenile                    | Habitat, Temperature_FW                                                     | Habitat_Distribution                        | Environment,                                  | Dispersal             |
| 1780            | NA       | NA                                   | NA                          | Theoretical/Opinion | General                 | Freshwater_habitat          | Management, Methods                                                         | Population_resilience                       | , Management                                  | Demography            |
| 1781            | 1        | Australia_New Zealand                | NA                          | Lab/Experimental    | O. mykiss               | Juvenile, Spawning          | Environment, Temperature_FW                                                 | Maturation                                  | Environment,                                  | Physiology            |
| 1782            | 10plus   | California, Mountain_west, Northwest | NA                          | Field/RemoteSensing | General                 | Freshwater_habitat, General | Flow, Habitat                                                               | NA                                          | Environment,                                  | NA                    |
| 1783            | 2to5     | Northwest                            | Northwest_Puget_Sound       | Lab/Experimental    | O. kisutch              | Marine                      | Acidity                                                                     | Behaviour, Performance                      | Environment,                                  | Dispersal, Physiology |
| 1784            | NA       | Northwest                            | Northwest_Columbia          | Review/MetaAnalysis | O. tshawytscha          | Evolution, Juvenile         | Habitat, Management                                                         | Genetics_Adaptation, Phenology              | Environment, Management                       | Demography, Evolution |
| 1785            | 10plus   | Northwest                            | Northwest_Columbia          | Field/RemoteSensing | O. nerka                | Juvenile, Marine            | Climate_indices, Flow, Temperature_FW                                       | Productivity                                | Environment,                                  | Demography            |
| 1786            | 2to5     | British_Columbia                     | British_Columbia_not_Fraser | Field/RemoteSensing | Other_fish              | Marine                      | Predators                                                                   | Habitat_Distribution                        | Species_interactions,                         | Dispersal             |
| 1787            | 10plus   | California                           | California_CV, California_N | Field/RemoteSensing | General                 | Freshwater_habitat          | Habitat, Temperature_FW                                                     | NA                                          | Environment,                                  | NA                    |
| 1788            | 1        | California                           | California_CV               | Field/RemoteSensing | O. tshawytscha          | Juvenile, Upmigration       | Methods                                                                     | Growth, Habitat_Distribution                |                                               | Dispersal, Physiology |
| 1789            | NA       | NA                                   | NA                          | Theoretical/Opinion | General                 | General                     | Methods                                                                     | NA                                          |                                               | NA                    |

| Citation number | Duration | Region                | Subregion                                     | Type of study                | Species                                                   | Life stage          | Driver                                                                    | Response                                  | Driver Process                                | Response Process       |
|-----------------|----------|-----------------------|-----------------------------------------------|------------------------------|-----------------------------------------------------------|---------------------|---------------------------------------------------------------------------|-------------------------------------------|-----------------------------------------------|------------------------|
| 1790            | 10plus   | British_Columbia      | British_Columbia_not_Fraser                   | Field/RemoteSensing          | O. clarkii, O. gorbuscha, O. kisutch, O. mykiss, S. malma | General, Population | Climate_indices, Density_Food, Environment, Flow, Habitat, Temperature_FW | Life_history, Productivity                | Species_interactions, Environment,            | Demography             |
| 1791            | 10plus   | Northwest             | Northwest_Columbia                            | Field/RemoteSensing          | O. mykiss                                                 | Juvenile, Marine    | Density_Food, Ecosystem                                                   | Growth, Phenology                         | Species_interactions,                         | Demography, Physiology |
| 1792            | 1        | Northwest             | Northwest_Puget_Sound                         | Lab/Experimental             | Other_species                                             | Marine              | Acidity                                                                   | Productivity                              | Environment,                                  | Demography             |
| 1793            | 1        | Northwest             | Northwest_Coastal                             | Field/RemoteSensing          | O. mykiss                                                 | Evolution           | Genetics                                                                  | Genetics_Adaptation, Habitat_Distribution | Evolution,                                    | Dispersal, Evolution   |
| 1794            | 6to10    | Northwest             | Northwest_Columbia                            | Field/RemoteSensing          | General                                                   | Freshwater_habitat  | Environment, Flow, Habitat, Temperature_FW                                | NA                                        | Environment,                                  | NA                     |
| 1795            | 2to5     | Alaska                | Alaska_SE                                     | Model                        | General                                                   | Freshwater_habitat  | Temperature_FW                                                            | NA                                        | Environment,                                  | NA                     |
| 1796            | 1        | California            | California_CV                                 | Lab/Experimental             | O. tshawytscha                                            | Juvenile, Spawning  | Density_Food, Genetics, Temperature_FW                                    | Maturation                                | Species_interactions, Evolution, Environment, | Physiology             |
| 1797            | NA       | Northwest             | Northwest_Columbia                            | Field/RemoteSensing          | General                                                   | Juvenile            | Acidity, Dissolved_oxygen, Habitat, Temperature_FW                        | NA                                        | Environment,                                  | NA                     |
| 1798            | NA       | California            | California_N                                  | Theoretical/Opinion          | Salmonid_general                                          | Juvenile            | Flow, Management                                                          | NA                                        | Environment, , Management                     | NA                     |
| 1799            | NA       | California, Northwest | California_N, California_S, Northwest_Coastal | Model, Projections/ecosystem | Other_species                                             | Marine              | Ecosystem, Environment, Predators, Temperature_marine                     | Productivity                              | Species_interactions, Environment,            | Demography             |
| 1800            | 1        | East_North_America    | NA                                            | Field/RemoteSensing          | O. mykiss                                                 | Juvenile            | Habitat, Temperature_FW                                                   | Behaviour, Mortality                      | Environment,                                  | Dispersal, Demography  |

| Citation number | Duration | Region             | Subregion                   | Type of study                           | Species                                            | Life stage             | Driver                                                                     | Response                               | Driver Process                                  | Response Process       |
|-----------------|----------|--------------------|-----------------------------|-----------------------------------------|----------------------------------------------------|------------------------|----------------------------------------------------------------------------|----------------------------------------|-------------------------------------------------|------------------------|
| 1801            | 10plus   | British_Columbia   | British_Columbia_not_Fraser | Field/RemoteSensing                     | General, O. tshawytscha                            | Marine                 | Contaminants, Dissolved_oxygen, Ecosystem, Environment, Fisheries, Methods | Productivity                           | Species_interactions, Environment, , Management | Demography             |
| 1802            | 1        | East_North_America | NA                          | Lab/Experimental                        | Other_species                                      | Marine                 | Acidity, Ecosystem                                                         | Genetics_Adaptation, Productivity      | Species_interactions, Environment, ,            | Demography, Evolution  |
| 1803            | 2to5     | Northwest          | Northwest_Puget_Sound       | Field/RemoteSensing                     | O. keta, O. kisutch, O. tshawytscha, Other_species | Juvenile, Outmigration | Density_Food, Habitat, Prey, Restoration                                   | Habitat_Distribution                   | Species_interactions, Environment, , Management | Dispersal              |
| 1804            | 6to10    | Northwest          | Northwest_Puget_Sound       | Field/RemoteSensing                     | O. tshawytscha                                     | Juvenile, Outmigration | Density_Food, Habitat, Prey, Restoration                                   | Habitat_Distribution, Life_history     | Species_interactions, Environment, , Management | Dispersal, Demography  |
| 1805            | 10plus   | British_Columbia   | Northwest_Columbia          | Field/RemoteSensing, Model              | O. mykiss, O. nerka                                | Juvenile               | Density_Food, Ecosystem, Flow, Management                                  | Productivity                           | Species_interactions, Environment, , Management | Demography             |
| 1806            | NA       | NA                 | NA                          | Model, Theoretical/Opinion              | S. salar                                           | General                | Density_Food, Management, Temperature_FW, Temperature_marine               | Population_resilience                  | Species_interactions, Environment, , Management | Demography             |
| 1807            | NA       | NA                 | NA                          | Model                                   | O. tshawytscha, Salmonid_general                   | Population             | NA                                                                         | Life_history, Maturation, Productivity |                                                 | Demography, Physiology |
| 1808            | 10plus   | Europe             | NA                          | Field/RemoteSensing, Projections/salmon | S. salar                                           | Freshwater_habitat     | Acidity                                                                    | Productivity                           | Environment, ,                                  | Demography             |

| Citation number | Duration | Region             | Subregion                                                    | Type of study                         | Species        | Life stage         | Driver                             | Response                                              | Driver Process                     | Response Process       |
|-----------------|----------|--------------------|--------------------------------------------------------------|---------------------------------------|----------------|--------------------|------------------------------------|-------------------------------------------------------|------------------------------------|------------------------|
| 1809            | NA       | Northwest          | Northwest_Coastal, Northwest_Columbia, Northwest_Puget_Sound | Model, Projections/physical           | General        | Freshwater_habitat | Flow, Temperature_FW               | NA                                                    | Environment,                       | NA                     |
| 1810            | 1        | Asia_other         | NA                                                           | Lab/Experimental                      | O. mykiss      | Outmigration       | Environment                        | Growth, Physiology_Condition                          | Environment,                       | Physiology             |
| 1811            | 6to10    | East_North_America | NA                                                           | Field/RemoteSensing                   | S. fontinalis  | Juvenile           | Density_Food, Flow, Temperature_FW | Growth                                                | Species_interactions, Environment, | Physiology             |
| 1812            | 2to5     | East_North_America | NA                                                           | Field/RemoteSensing                   | S. fontinalis  | Juvenile           | Density_Food, Flow, Temperature_FW | Growth                                                | Species_interactions, Environment, | Physiology             |
| 1813            | 1        | Asia_other         | NA                                                           | Lab/Experimental                      | O. tshawytscha | Egg                | Disease                            | Physiology_Condition                                  | Species_interactions,              | Physiology             |
| 1814            | 1        | Asia_other         | NA                                                           | Lab/Experimental                      | O. tshawytscha | Egg                | Disease                            | Physiology_Condition                                  | Species_interactions,              | Physiology             |
| 1815            | 10plus   | British_Columbia   | British_Columbia_Fraser                                      | Field/RemoteSensing                   | O. tshawytscha | Marine, Population | Climate_indices, Environment, Flow | Growth                                                | Environment,                       | Physiology             |
| 1816            | 10plus   | British_Columbia   | British_Columbia_not_Fraser                                  | Field/RemoteSensing                   | Other_fish     | Marine             | Climate_indices, Fisheries         | Productivity                                          | Environment, , Management          | Demography             |
| 1817            | 1        | Japan              | NA                                                           | Field/RemoteSensing, Lab/Experimental | O. masou       | Juvenile           | Flow, Habitat                      | Genetics_Adaptation, Morphology                       | Environment,                       | Evolution, Physiology  |
| 1818            | 2to5     | Japan              | NA                                                           | Lab/Experimental                      | O. masou       | Egg, Juvenile      | Genetics                           | Carryover, Growth, Life_history, Physiology_Condition | Evolution,                         | Demography, Physiology |
| 1819            | 1        | Asia_other         | NA                                                           | Lab/Experimental                      | Other_fish     | General, Juvenile  | Temperature_FW                     | Behaviour, Performance                                | Environment,                       | Dispersal, Physiology  |

| Citation number | Duration | Region                | Subregion     | Type of study                                    | Species                                     | Life stage                                            | Driver                                             | Response                                                                      | Driver Process                                           | Response Process         |
|-----------------|----------|-----------------------|---------------|--------------------------------------------------|---------------------------------------------|-------------------------------------------------------|----------------------------------------------------|-------------------------------------------------------------------------------|----------------------------------------------------------|--------------------------|
| 1820            | NA       | California            | NA            | Theoretical/<br>Opinion                          | General                                     | General                                               | Ecosystem,<br>Flow,<br>Management,<br>Methods      | NA                                                                            | Species_interactions, NA<br>Environment, ,<br>Management |                          |
| 1821            | NA       | California            | California_CV | Model                                            | General                                     | Freshwater_ha<br>bitat                                | Flow,<br>Management                                | Population_resilience                                                         | Environment, ,<br>Management                             | Demography               |
| 1822            | 10plus   | Alaska                | Alaska_W      | Field/<br>RemoteSensing                          | O. tshawytscha                              | Marine                                                | Environment,<br>Prey,<br>Temperature_<br>marine    | Growth                                                                        | Species_interactions, Environment,                       | Physiology               |
| 1823            | 10plus   | Alaska                | Alaska_W      | Field/<br>RemoteSensing                          | O. gorbuscha, O. keta, O. nerka, Other_fish | Marine                                                | Density_Food, Ecosystem,<br>Temperature_<br>marine | Habitat_Distribution                                                          | Species_interactions, Environment,                       | Dispersal                |
| 1824            | 10plus   | California            | California_CV | Field/<br>RemoteSensing,<br>Model                | O. tshawytscha                              | Egg,<br>Freshwater_ha<br>bitat, Juvenile,<br>Spawning | Flow,<br>Temperature_<br>FW                        | Population_resilience                                                         | Environment,                                             | Demography               |
| 1825            | 10plus   | Largescale            | NA            | Field/<br>RemoteSensing,<br>Model                | General                                     | Marine                                                | Ecosystem                                          | Productivity                                                                  | Species_interactions,                                    | Demography               |
| 1826            | NA       | NA                    | NA            | Model                                            | Salmonid_<br>general                        | Upmigration                                           | Density_Food                                       | Behaviour,<br>Habitat_Distribution,<br>Population_resilience,<br>Productivity | Species_interactions,                                    | Dispersal,<br>Demography |
| 1827            | 1        | Asia_other            | NA            | Lab/<br>Experimental                             | O. mykiss                                   | Juvenile                                              | Dissolved_oxygen,<br>Temperature_<br>FW            | Performance,<br>Physiology_Condition                                          | Environment,                                             | Physiology               |
| 1828            | 1        | Alaska                | NA            | Field/<br>RemoteSensing,<br>Lab/<br>Experimental | O. keta, O. tshawytscha                     | Marine                                                | Fisheries,<br>Management,<br>Methods               | Mortality                                                                     | , Management                                             | Demography               |
| 1829            | 2to5     | Australia_New Zealand | NA            | Field/<br>RemoteSensing                          | S. trutta                                   | Upmigration                                           | Flow,<br>Temperature_<br>FW                        | Behaviour, Mortality                                                          | Environment,                                             | Dispersal,<br>Demography |

| Citation number | Duration | Region             | Subregion                              | Type of study              | Species                                              | Life stage        | Driver                                                  | Response                                                                 | Driver Process                     | Response Process       |
|-----------------|----------|--------------------|----------------------------------------|----------------------------|------------------------------------------------------|-------------------|---------------------------------------------------------|--------------------------------------------------------------------------|------------------------------------|------------------------|
| 1830            | 10plus   | Northwest          | Northwest_Columbia, Northwest_Columbia | Field/RemoteSensing        | O. tshawytscha                                       | Marine            | Temperature_marine                                      | Habitat_Distribution                                                     | Environment,                       | Dispersal              |
| 1831            | 1        | Asia_other         | NA                                     | Lab/Experimental           | Other_fish                                           | General, Marine   | Disease, Temperature_FW                                 | Performance, Physiology_Condition                                        | Species_interactions, Environment, | Physiology             |
| 1832            | 2to5     | Europe             | NA                                     | Lab/Experimental           | General                                              | Juvenile          | Temperature_FW                                          | Growth                                                                   | Environment,                       | Physiology             |
| 1833            | 10plus   | Northwest          | Northwest_Columbia                     | Field/RemoteSensing, Model | O. tshawytscha                                       | Population        | Climate_indices, Habitat, Predators, Temperature_marine | Life_history, Maturation, Mortality, Population_resilience, Productivity | Species_interactions, Environment, | Demography, Physiology |
| 1834            | 2to5     | Northwest          | Northwest_Columbia                     | Field/RemoteSensing, Model | O. mykiss, O. tshawytscha                            | Upmigration       | Flow, Management, Methods, Temperature_FW               | Behaviour, Performance                                                   | Environment, , Management          | Dispersal, Physiology  |
| 1835            | 2to5     | Northwest          | Northwest_Columbia                     | Field/RemoteSensing        | O. tshawytscha                                       | General, Juvenile | Methods                                                 | Growth                                                                   |                                    | Physiology             |
| 1836            | 1        | East_North_America | NA                                     | Lab/Experimental           | S. salar                                             | Juvenile          | Dissolved_oxygen, Temperature_FW                        | Immune, Physiology_Condition                                             | Environment,                       | Physiology             |
| 1837            | 2to5     | California         | California_CV                          | Field/RemoteSensing        | General, O. tshawytscha                              | Juvenile          | Flow, Management, Temperature_FW                        | Growth, Population_resilience                                            | Environment, , Management          | Demography, Physiology |
| 1838            | 6to10    | Russia             | NA                                     | Field/RemoteSensing        | Other_fish, Other_species, Salmonid_general          | Marine            | Density_Food, Prey                                      | Growth                                                                   | Species_interactions,              | Physiology             |
| 1839            | 6to10    | Russia             | NA                                     | Field/RemoteSensing        | O. keta, Other_fish, Other_species, Salmonid_general | Marine            | Density_Food, Prey                                      | Growth                                                                   | Species_interactions,              | Physiology             |

| Citation number | Duration | Region        | Subregion                                 | Type of study                                 | Species                   | Life stage             | Driver                                          | Response                                          | Driver Process                       | Response Process       |
|-----------------|----------|---------------|-------------------------------------------|-----------------------------------------------|---------------------------|------------------------|-------------------------------------------------|---------------------------------------------------|--------------------------------------|------------------------|
| 1840            | 1        | Europe        | NA                                        | Lab/<br>Experimental                          | S. salar                  | Juvenile               | Prey                                            | Growth, Performance, Physiology_Condition         | Species_interactions,                | Physiology             |
| 1841            | 10plus   | Mountain_west | NA                                        | Field/<br>RemoteSensing                       | O. clarkii                | General, Population    | Flow, Temperature_FW                            | Habitat_Distribution, Population_resilience       | Environment,                         | Dispersal, Demography  |
| 1842            | NA       | California    | California_CV                             | Field/<br>RemoteSensing                       | O. tshawytscha            | Juvenile               | Habitat, Management                             | Population_resilience                             | Environment, , Management            | Demography             |
| 1843            | 10plus   | California    | California_CV                             | Field/<br>RemoteSensing                       | O. tshawytscha            | Juvenile, Outmigration | Flow, Management, Temperature_FW                | Behaviour, Mortality, Phenology                   | Environment, , Management            | Dispersal, Demography  |
| 1844            | 2to5     | California    | California_CV                             | Field/<br>RemoteSensing                       | O. tshawytscha            | Juvenile, Outmigration | Flow, Habitat                                   | Mortality                                         | Environment,                         | Demography             |
| 1845            | NA       | California    | California_CV                             | Field/<br>RemoteSensing                       | O. tshawytscha            | Population             | Flow, Habitat, Restoration                      | Population_resilience                             | Environment, , Management            | Demography             |
| 1846            | 6to10    | California    | California_CV                             | Model                                         | O. tshawytscha            | Population             | Flow, Management, Methods, Temperature_FW       | Life_history, Population_resilience, Productivity | Environment, , Management            | Demography             |
| 1847            | NA       | Northwest     | Northwest_Columbia                        | Model, Projections/salmon                     | O. mykiss, O. tshawytscha | Juvenile, Outmigration | Flow, Management, Temperature_FW                | Mortality                                         | Environment, , Management            | Demography             |
| 1848            | NA       | Largescale    | NA                                        | Model, Projections/physical                   | General                   | Freshwater_habitat     | Flow                                            | NA                                                | Environment,                         | NA                     |
| 1849            | NA       | California    | California_CV, California_N, California_S | Review/<br>MetaAnalysis                       | O. tshawytscha            | General                | Genetics, Management, Temperature_FW            | Mortality, Physiology_Condition                   | Evolution, Environment, , Management | Demography, Physiology |
| 1850            | 10plus   | Northwest     | Northwest_Puget_Sound                     | Field/<br>RemoteSensing                       | O. tshawytscha            | Juvenile               | Density_Food, Flow                              | Life_history, Mortality                           | Species_interactions, Environment,   | Demography             |
| 1851            | 1        | Northwest     | Northwest_Puget_Sound                     | Field/<br>RemoteSensing, Lab/<br>Experimental | O. kisutch, Other_fish    | Juvenile               | Dissolved_oxygen, Environment, Flow, Management | Behaviour, Growth                                 | Environment, , Management            | Dispersal, Physiology  |

| Citation number | Duration | Region             | Subregion | Type of study           | Species                                    | Life stage             | Driver                      | Response                        | Driver Process                     | Response Process       |
|-----------------|----------|--------------------|-----------|-------------------------|--------------------------------------------|------------------------|-----------------------------|---------------------------------|------------------------------------|------------------------|
| 1852            | 10plus   | East_North_America | NA        | Field/<br>RemoteSensing | S. fontinalis, S. trutta, Salmonid_general | Juvenile               | Density_Food, Habitat       | Growth, Habitat_Distribution    | Species_interactions, Environment, | Dispersal, Physiology  |
| 1853            | 1        | East_North_America | NA        | Lab/<br>Experimental    | S. salar                                   | Juvenile, Outmigration | Environment, Temperature_FW | Phenology, Physiology_Condition | Environment,                       | Demography, Physiology |

Evolution\* indicates that it was labeled as an evolutionar process but does not involve genetic analyses



**Index Citation**

---

- 1 Abadia-Cardoso, A., D. E. Pearse, S. Jacobson, J. Marshall, D. Dalrymple, F. Kawasaki, G. Ruiz-Campos, and J. C. Garza. 2016. Population genetic structure and ancestry of steelhead/rainbow trout (*Oncorhynchus mykiss*) at the extreme southern edge of their range in North America. *Conservation Genetics* 17:675-689.
- 2 Abadia-Cardoso, A., R. Hernandez-Guzman, A. Varela-Romero, J. C. Garza, and F. J. Garcia-De Leon. 2021. Population genetics and species distribution modeling highlight conservation needs of the endemic trout from the
- 3 Abdul-Aziz, O. I., N. J. Mantua, and K. W. Myers. 2011. Potential climate change impacts on thermal habitats of Pacific salmon (*Oncorhynchus* spp.) in the North Pacific Ocean and adjacent seas. *Canadian Journal of Fisheries*
- 4 Abe, T. K., T. Kitagawa, Y. Makiguchi, and K. Sato. 2019. Chum salmon migrating upriver adjust to environmental temperatures through metabolic compensation. *Journal of Experimental Biology* 222:10.
- 5 Abrahms, B., E. L. Hazen, S. J. Bograd, J. S. Brashares, P. W. Robinson, K. L. Scales, D. E. Crocker, and D. P. Costa. 2018. Climate mediates the success of migration strategies in a marine predator. *Ecology Letters* 21:63-71.
- 6 Achord, S., R. W. Zabel, and B. P. Sandford. 2007. Migration timing, growth, and estimated parr-to-smolt survival rates of wild snake river spring-summer Chinook salmon from the Salmon River basin, Idaho, to the Lower Snake
- 7 Adams, J. B., S. M. Bollens, and J. G. Bishop. 2015. Predation on the Invasive Copepod, *Pseudodiaptomus forbesi*, and Native Zooplankton in the Lower Columbia River: An Experimental Approach to Quantify Differences in Prey-
- 8 Adams, L. E., J. R. Lund, P. B. Moyle, R. M. Quiñones, J. D. Herman, and T. A. O'Rear. 2017. Environmental hedging: A theory and method for reconciling reservoir operations for downstream ecology and water supply. *Water*
- 9 Adelfio, L. A., S. M. Wondzell, N. J. Mantua, and G. H. Reeves. 2019. Warm winters reduce landscape-scale variability in the duration of egg incubation for coho salmon (*Oncorhynchus kisutch*) on the Copper River Delta,
- 10 Agha, M., J. P. Losee, M. N. C. Litz, C. Smith, J. J. Schaffler, W. S. Patton, A. M. Dufault, and G. M. Madel. 2021. Temporal patterns and ecosystem correlates of chum salmon (*Oncorhynchus keta*) migration phenology in the
- 11 Aha, N. M., P. B. Moyle, N. A. Fangue, A. L. Rypel, and J. R. Durand. 2021. Managed Wetlands Can Benefit Juvenile Chinook Salmon in a Tidal Marsh. *Estuaries and Coasts* 44:1440-1453.
- 12 Ainley, D. G., and K. D. Hyrenbach. 2010. Top-down and bottom-up factors affecting seabird population trends in the California Current System (1985-2006). *Progress in Oceanography* 84:242-254.
- 13 Ainsworth, C. H., J. F. Samhouri, D. S. Busch, W. W. L. Chueng, J. Dunne, and T. A. Okey. 2011. Potential impacts of climate change on Northeast Pacific marine fisheries and food webs. *Ices Journal of Marine Science* 68:1217-1229.
- 14 Ainsworth, L. M., R. Routledge, and J. Cao. 2011. Functional data analysis in ecosystem research: The decline of Oweekeno Lake sockeye salmon and Wannock River flow. *Journal of Agricultural Biological and Environmental*
- 15 Akbarzadeh, A., A. L. S. Houde, B. G. Sutherland, O. P. Gunther, and K. M. Miller. 2020. Identification of Hypoxia-Specific Biomarkers in Salmonids Using RNA-Sequencing and Validation Using High-Throughput qPCR. *G3-Genes*
- 16 Akbarzadeh, A., D. T. Selbie, L. B. Pon, and K. M. Miller. 2021. Endangered Cultus Lake sockeye salmon exhibit genomic evidence of hypoxic and thermal stresses while rearing in degrading freshwater lacustrine critical habitat.
- 17 Akbarzadeh, A., O. P. Gunther, A. L. Houde, S. R. Li, T. J. Ming, K. M. Jeffries, S. G. Hinch, and K. M. Miller. 2018. Developing specific molecular biomarkers for thermal stress in salmonids. *Bmc Genomics* 19:749.
- 18 Al-Chokhachy, R., B. B. Roper, E. K. Archer, and S. Miller. 2011. Quantifying the extent of and factors associated with the temporal variability of physical stream habitat in headwater streams in the Interior Columbia River Basin.
- 19 Al-Chokhachy, R., J. Alder, S. Hostetler, R. Gresswell, and B. Shepard. 2013. Thermal controls of Yellowstone cutthroat trout and invasive fishes under climate change. *Global Change Biology* 19:3069-3081.
- 20 Al-Chokhachy, R., M. K. Lien, B. B. Shepard, and B. High. 2021. The interactive effects of stream temperature, stream size, and non-native species on Yellowstone cutthroat trout. *Canadian Journal of Fisheries and Aquatic*
- 21 Alava, J. J., A. M. Cisneros-Montemayor, U. R. Sumaila, and W. W. L. Cheung. 2018. Projected amplification of food web bioaccumulation of MeHg and PCBs under climate change in the Northeastern Pacific. *Scientific Reports*
- 22 Albouy, C., V. Delattre, G. Donati, T. L. Frolicher, S. Albouy-Boyer, M. Rufino, L. Pellissier, D. Mouillot, and F. Leprieur. 2020. Global vulnerability of marine mammals to global warming. *Scientific Reports* 10.
- 23 Alexander, J. D., B. L. Kerans, T. M. Koel, and C. Rasmussen. 2011. Context-specific parasitism in *Tubifex tubifex* in geothermally influenced stream reaches in Yellowstone National Park. *Journal of the North American*
- 24 Alexander, J. D., S. L. Hallett, R. W. Stocking, L. Xue, and J. L. Bartholomew. 2014. Host and parasite populations after a ten year flood: *Manayunkia speciosa* and *Ceratonova* (syn *Ceratomyxa*) *shasta* in the Klamath River.
- 25 Alfonso, S., M. Gesto, and B. Sadoul. 2021. Temperature increase and its effects on fish stress physiology in the context of global warming. *Journal of Fish Biology* 98:1496-1508.

- 26 Alfredsen, K. T., H. A. Urke, T. Kristensen, M. Kvakland, A. Gronningsater, A. G. Hagen, and J. A. Alfredsen. 2021. An acoustic sensor transmitter for in situ assessment of water quality and fish behaviour during chemical treatment of a parasite-infected river system: tag design and practical use. *Animal Biotelemetry* 9.
- 27 Almodovar, A., D. Ayllon, G. G. Nicola, B. Jonsson, and B. Elvira. 2019. Climate-driven biophysical changes in feeding and breeding environments explain the decline of southernmost European Atlantic salmon populations.
- 28 Almodovar, A., G. G. Nicola, D. Ayllon, and B. Elvira. 2012. Global warming threatens the persistence of Mediterranean brown trout. *Global Change Biology* 18:1549-1560.
- 29 Almodovar, A., S. Leal, G. G. Nicola, J. L. Horreo, E. Garcia-Vazquez, and B. Elvira. 2020. Long-term stocking practices threaten the original genetic diversity of the southernmost European populations of Atlantic salmon
- 30 Alnodovar, A., G. G. Nicola, D. Ayllon, C. N. Trueman, I. Davidson, R. Kennedy, and B. Elvira. 2020. Stable isotopes suggest the location of marine feeding grounds of South European Atlantic salmon in Greenland. *Ices Journal of*
- 31 Alshwairikh, Y. A., S. L. Kroeze, J. Olsson, S. A. Stephens-Cardenas, W. L. Swain, L. P. Waits, R. L. Horn, S. R. Narum, and T. Seaborn. 2021. Influence of environmental conditions at spawning sites and migration routes on adaptive variation and population connectivity in Chinook salmon. *Ecology and Evolution* 11:16890-16908.
- 32 Amin, M. H. F., J. H. Lee, A. R. Kim, J. K. Kim, C. I. Lee, and H. W. Kim. 2021. Development of a Quantitative PCR Assay for Four Salmon Species Inhabiting the Yangyangnamdae River Using Environmental DNA. *Biology-Basel* 10.
- 33 Amish, S. J., O. Ali, M. Peacock, M. Miller, M. Robinson, S. Smith, G. Luikart, and H. Neville. 2019. Assessing thermal adaptation using family-based association and F-ST outlier tests in a threatened trout species. *Molecular*
- 34 Anciaux, Y., L. M. Chevin, O. Ronce, and G. Martin. 2018. Evolutionary rescue over a fitness landscape. *Genetics*
- 35 Anderson, A. J., A. M. Claiborne, M. Agha, and M. N. C. Litz. 2021. Puget Sound Chum Salmon Growth Linked to Competitor Abundance, Climate Indices, and Copepod Species Richness. *Transactions of the American Fisheries*
- 36 Anderson, A. J., and B. P. Kennedy. 2020. Variation in juvenile steelhead (*Oncorhynchus mykiss*) dispersal in relation to age and growth performance. *Ecology of Freshwater Fish* 29:502-517.
- 37 Anderson, J. H., and P. C. Topping. 2018. Juvenile life history diversity and freshwater productivity of Chinook salmon in the Green River, Washington. *North American Journal of Fisheries Management* 38:180-193.
- 38 Anderson, J. J., E. Gurarie, C. Bracis, B. J. Burke, and K. L. Laidre. 2013. Modeling climate change impacts on phenology and population dynamics of migratory marine species. *Ecological Modelling* 264:83-97.
- 39 Anderson, K., H. King, N. Pankhurst, N. Ruff, P. Pankhurst, and A. Elizur. 2012. Effect of elevated temperature on estrogenic induction of vitellogenesis and zonagenesis in juvenile Atlantic salmon (*Salmo salar*). *Marine and*
- 40 Anderson, S. C., J. W. Moore, M. M. McClure, N. K. Dulvy, and A. B. Cooper. 2015. Portfolio conservation of metapopulations under climate change. *Ecological Applications* 25:559-572.
- 41 Anim, D. O., T. D. Fletcher, G. J. Vietz, G. B. Pasternack, and M. J. Burns. 2019. Restoring in-stream habitat in urban catchments: Modify flow or the channel? *Ecohydrology* 12:16.
- 42 Anttila, K., A. P. Farrell, D. A. Patterson, S. G. Hinch, and E. J. Eliason. 2019. Cardiac SERCA activity in sockeye salmon populations: an adaptive response to migration conditions. *Canadian Journal of Fisheries and Aquatic*
- 43 Anttila, K., E. J. Eliason, K. H. Kaukinen, K. M. Miller, and A. P. Farrell. 2014. Facing warm temperatures during migration: cardiac mRNA responses of two adult *Oncorhynchus nerka* populations to warming and swimming
- 44 Anttila, K., M. Lewis, J. M. Prokkola, M. Kanerva, E. Seppanen, I. Kolari, and M. Nikinmaa. 2015. Warm acclimation and oxygen depletion induce species-specific responses in salmonids. *Journal of Experimental Biology* 218:1471-
- 45 Anttila, K., M. T. Casselman, P. M. Schulte, and A. P. Farrell. 2013. Optimum temperature in juvenile salmonids: Connecting subcellular indicators to tissue function and whole-organism thermal optimum. *Physiological and*
- 46 Anttila, K., R. S. Dhillon, E. G. Boulding, A. P. Farrell, B. D. Glebe, J. A. K. Elliott, W. R. Wolters, and P. M. Schulte. 2013. Variation in temperature tolerance among families of Atlantic salmon (*Salmo salar*) is associated with hypoxia tolerance, ventricle size and myoglobin level. *Journal of Experimental Biology* 216:1183-1190.
- 47 Apgar, T. M., J. E. Merz, B. T. Martin, and E. P. Palkovacs. 2021. Alternative migratory strategies are widespread in subyearling Chinook salmon. *Ecology of Freshwater Fish* 30:125-139.
- 48 Araneda, C., N. F. Diaz, G. Gomez, M. E. Lopez, and P. Iturra. 2012. Comparative mapping reveals quantitative trait loci that affect spawning time in coho salmon (*Oncorhynchus kisutch*). *Genetics and Molecular Biology* 35:515-
- 49 Araujo, H. A., W. D. P. Duguid, R. Withler, J. Supernault, A. D. Schulze, J. L. McKenzie, K. Pellett, T. D. Beacham, K. Jonsen, and A. Gummer. 2021. Chinook and Coho salmon hybrids linked to habitat and climatic changes on
- 50 Archer, L. C., S. A. Hutton, L. Harman, M. N. O'Grady, J. P. Kerry, W. R. Poole, P. Gargans, P. McGinnity, and T. E. Reed. 2019. The Interplay Between Extrinsic and Intrinsic Factors in Determining Migration Decisions in Brown

- 51 Archer, L. C., S. A. Hutton, L. Harman, S. D. McCormick, M. N. O'Grady, J. P. Kerry, W. R. Poole, P. Gargan, P. McGinnity, and T. E. Reed. 2020. Food and temperature stressors have opposing effects in determining flexible migration decisions in brown trout (*Salmo trutta*). *Global Change Biology* 26:2878-2896.
- 52 Archer, L. C., S. A. Hutton, L. Harman, W. R. Poole, P. Gargan, P. McGinnity, and T. E. Reed. 2020. Metabolic traits in brown trout (*Salmo trutta*) vary in response to food restriction and intrinsic factors. *Conservation Physiology* 8.
- 53 Arciniega, M., A. J. Clemento, M. R. Miller, M. Peterson, J. C. Garza, and D. E. Pearse. 2016. Parallel evolution of the summer steelhead ecotype in multiple populations from Oregon and Northern California. *Conservation*
- 54 Arevalo, E., A. Maire, S. Tetard, E. Prevost, F. Lange, F. Marchand, Q. Josset, and H. Drouineau. 2021. Does global change increase the risk of maladaptation of Atlantic salmon migration through joint modifications of river
- 55 Arevalo, E., S. Panzerat, I. Seiliez, A. Larranaga, and A. Bardonnnet. 2018. Effect of food shortage and temperature on age 0+salmonids: A contribution to predict the effects of climate change. *Journal of Fish Biology* 92:642-652.
- 56 Armstrong, J. B., A. H. Fullerton, C. E. Jordan, J. L. Ebersole, J. R. Bellmore, I. Arismendi, B. E. Penaluna, and G. H. Reeves. 2021. The importance of warm habitat to the growth regime of cold-water fishes. *Nature Climate Change*
- 57 Armstrong, J. B., D. E. Schindler, C. J. Cunningham, W. Deacy, and P. Walsh. 2019. Watershed complexity increases the capacity for salmon-wildlife interactions in coastal ecosystems. *Conservation Letters*:9.
- 58 Armstrong, J. B., D. E. Schindler, K. L. Omori, C. P. Ruff, and T. P. Quinn. 2010. Thermal heterogeneity mediates the effects of pulsed subsidies across a landscape. *Ecology* 91:1445-1454.
- 59 Armstrong, J. D., K. J. Millidine, and N. B. Metcalfe. 2011. Ecological consequences of variation in standard metabolism and dominance among salmon parr. *Ecology of Freshwater Fish* 20:371-376.
- 60 Armstrong, J. D., S. McKelvey, G. W. Smith, P. Rycroft, and R. J. Fryer. 2018. Effects of individual variation in length, condition and run-time on return rates of wild-reared Atlantic salmon *Salmo salar* smolts. *Journal of Fish*
- 61 Arriaza, J. L., D. A. Boughton, K. Urquhart, and M. Mangel. 2017. Size-conditional smolting and the response of Carmel River steelhead to two decades of conservation efforts. *Plos One* 12:e0188971.
- 62 Arthaud, D. L., C. M. Greene, K. Guilbault, and J. V. Morrow. 2010. Contrasting life-cycle impacts of stream flow on two Chinook salmon populations. *Hydrobiologia* 655:171-188.
- 63 Arts, M. T., M. E. Palmer, A. B. Skiftesvik, I. E. Jokinen, and H. I. Browman. 2012. UVB radiation variably affects n-3 fatty acids but elevated temperature reduces n-3 fatty acids in juvenile Atlantic salmon (*Salmo salar*). *Lipids*
- 64 Asheim, E. R., J. M. Prokkola, S. Morozov, T. Aykanat, and C. R. Primmer. 2021. Standard metabolic rate does not associate with age-at-maturity genotype in juvenile Atlantic salmon. *Ecology and Evolution*.
- 65 Atcheson, M. E., K. W. Myers, D. A. Beauchamp, and N. J. Mantua. 2012. Bioenergetic response by steelhead to variation in diet, thermal habitat, and climate in the North Pacific Ocean. *Transactions of the American Fisheries*
- 66 Atcheson, M. E., K. W. Myers, N. D. Davis, and N. J. Mantua. 2012. Potential trophodynamic and environmental drivers of steelhead (*Oncorhynchus mykiss*) productivity in the North Pacific Ocean. *Fisheries Oceanography*
- 67 Atlas, W. I., K. M. Seitz, J. W. N. Jorgenson, B. Millard-Martin, W. G. Housty, D. Ramos-Espinoza, N. J. Burnett, M. Reid, and J. W. Moore. 2021. Thermal sensitivity and flow-mediated migratory delays drive climate risk for coastal
- 68 Attrill, M. J., and M. Edwards. 2008. Reply to Haddock, S. H. D. Reconsidering evidence for potential climate-related increases in jellyfish. *Limnology and Oceanography* 53:2763-2766.
- 69 Audzijonyte, A., A. Kuparinen, and E. A. Fulton. 2013. How fast is fisheries-induced evolution? Quantitative analysis of modelling and empirical studies. *Evol Appl* 6:585-595.
- 70 Auer, S. K., R. D. Bassar, D. Turek, G. J. Anderson, S. McKelvey, J. D. Armstrong, K. H. Nislow, H. K. Downie, T. A. J. Morgan, D. McLennan, and N. B. Metcalfe. 2020. Metabolic Rate Interacts with Resource Availability to Determine Individual Variation in Microhabitat Use in the Wild. *American Naturalist* 196:132-144.
- 71 Austad, B., L. A. Vollestad, and A. Foldvik. 2021. Frequency of vateritic otoliths and potential consequences for marine survival in hatchery-reared Atlantic salmon. *Journal of Fish Biology* 98:1401-1409.
- 72 Austin, C. S., T. E. Essington, and T. P. Quinn. 2019. Spawning and emergence phenology of bull trout *Salvelinus confluentus* under differing thermal regimes. *Journal of Fish Biology* 94:191-195.
- 73 Austin, C. S., T. E. Essington, and T. P. Quinn. 2021. In a warming river, natural-origin Chinook salmon spawn later but hatchery-origin conspecifics do not. *Canadian Journal of Fisheries and Aquatic Sciences* 78:68-77.
- 74 Aydin, K. Y., G. A. McFarlane, J. R. King, B. A. Megrey, and K. W. Myers. 2005. Linking oceanic food webs to coastal production and growth rates of Pacific salmon (*Oncorhynchus* spp.), using models on three scales. *Deep Sea*
- 75 Ayllon, D., G. G. Nicola, B. Elvira, and A. Almodovar. 2021. Climate change will render size-selective harvest of cold-water fish species unsustainable in Mediterranean freshwaters. *Journal of Applied Ecology* 58:562-575.

- 76 Ayllon, D., G. G. Nicola, B. Elvira, I. Parra, and A. Almodovar. 2013. Thermal carrying capacity for a thermally-sensitive species at the warmest edge of its range. *Plos One* 8:e81354.
- 77 Babin, A. B., M. Ndong, K. Haralampides, S. Peake, R. Jones, R. A. Curry, and T. Linnansaari. 2021. Overwintering and migration behaviour of post-spawned Atlantic salmon *Salmo salar* in a large hydropower-regulated river and
- 78 Babin, A. B., S. Peake, T. Linnansaari, R. A. Curry, M. Ndong, K. Haralampides, and R. Jones. 2021. Atlantic Salmon Upstream Migration Delay in a Large Hydropower Reservoir. *North American Journal of Fisheries Management*
- 79 Backe, K., E. Hines, K. J. Nielsen, D. George, E. Twohy, and M. Lowry. 2021. Effects of sea-level rise and storm-enhanced flooding on Pacific harbour seal habitat: A comparison of haul-out changes at the Russian and Eel river
- 80 Baerum, K. M., A. G. Finstad, E. M. Ulvan, and T. O. Haugen. 2021. Population consequences of climate change through effects on functional traits of lentic brown trout in the sub-Arctic. *Scientific Reports* 11.
- 81 Bailey, C. J., D. C. Braun, D. McCubbing, J. D. Reynolds, B. Ward, T. D. Davies, and J. W. Moore. 2018. The roles of extrinsic and intrinsic factors in the freshwater life-history dynamics of a migratory salmonid. *Ecosphere* 9:e02397.
- 82 Bailey, C., H. Segner, A. Casanova-Nakayama, and T. Wahli. 2017. Who needs the hotspot? The effect of temperature on the fish host immune response to *Tetracapsuloides bryosalmonae* the causative agent of
- 83 Bailey, C., H. Segner, and T. Wahli. 2017. What goes around comes around: an investigation of resistance to proliferative kidney disease in rainbow trout *Oncorhynchus mykiss* (Walbaum) following experimental re-
- 84 Bailey, C., H. Segner, T. Wahli, and C. Tafalla. 2020. Back From the Brink: Alterations in B and T Cell Responses Modulate Recovery of Rainbow Trout From Chronic Immunopathological *Tetracapsuloides bryosalmonae* Infection.
- 85 Bailey, C., N. Strepparava, T. Wahli, and H. Segner. 2019. Exploring the immune response, tolerance and resistance in proliferative kidney disease of salmonids. *Developmental and Comparative Immunology* 90:165-175.
- 86 Baker, J. P., and S. A. Bonar. 2019. Using a Mechanistic Model to Develop Management Strategies to Cool Apache Trout Streams under the Threat of Climate Change. *North American Journal of Fisheries Management* 39:849-867.
- 87 Baker, N. J., M. J. Taylor, I. G. Cowx, J. P. Harvey, A. D. Nunn, N. V. Angelopoulos, M. A. Smith, R. A. Noble, M. Tinsdeall, J. Baxter, and J. D. Bolland. 2020. The Response of River-Resident Fish to Reservoir Freshet Releases of Varying Profiles Intended to Facilitate a Spawning Migration. *Water Resources Research* 56.
- 88 Bakke, P. D., M. Hrachovec, and K. D. Lynch. 2020. Hyporheic Process Restoration: Design and Performance of an
- 89 Bakken, T. H., A. Harby, T. Forseth, O. Ugedal, J. F. Sauterleute, J. H. Halleraker, and K. Alfordsen. 2021. Classification of hydropeaking impacts on Atlantic salmon populations in regulated rivers. *River Research and*
- 90 Bakun, A. 2010. Linking climate to population variability in marine ecosystems characterized by non-simple dynamics: Conceptual templates and schematic constructs. *Journal of Marine Systems* 79:361-373.
- 91 Bakun, A., B. A. Black, S. J. Bograd, M. García-Reyes, A. J. Miller, R. R. Rykaczewski, and W. J. Sydeman. 2015. Anticipated effects of climate change on coastal upwelling ecosystems. *Current Climate Change Reports* 1:85-93.
- 92 Bal, G., E. Rivot, E. Prevost, C. Piou, and J. L. Bagliniere. 2011. Effect of water temperature and density of juvenile salmonids on growth of young-of-the-year Atlantic salmon *Salmo salar*. *Journal of Fish Biology* 78:1002-1022.
- 93 Banet, A. I., S. J. Healy, E. J. Eliason, E. A. Roualdes, D. A. Patterson, and S. G. Hinch. 2019. Simulated maternal stress reduces offspring aerobic swimming performance in Pacific salmon. *Conserv Physiol* 7:coz095.
- 94 Bard, B., A. Dodge, W. Joyce, M. Lawrence, S. J. Cooke, and K. M. Gilmour. 2021. Elevated cortisol lowers thermal tolerance but results in limited cardiac remodelling in rainbow trout (*Oncorhynchus mykiss*) experiencing chronic
- 95 Barnard, P. L., J. E. Dugan, H. M. Page, N. J. Wood, J. A. F. Hart, D. R. Cayan, L. Erikson, D. M. Hubbard, M. R. Myers, J. M. Melack, and S. F. Iacobellis. 2021. Multiple climate change-driven tipping points for coastal systems.
- 96 Barnett, H. K., T. P. Quinn, M. Bhuthimethee, and J. R. Winton. 2020. Increased prespawning mortality threatens an integrated natural- and hatchery-origin sockeye salmon population in the Lake Washington Basin. *Fisheries*
- 97 Barnett, L. A. K., E. J. Ward, and S. C. Anderson. 2021. Improving estimates of species distribution change by incorporating local trends. *Ecography* 44:427-439.
- 98 Barton, D. N., H. Sundt, A. A. Bustos, H. P. Fjeldstad, R. Hedger, T. Forseth, B. Kohler, O. Aas, K. Alfordsen, and A. L. Madsen. 2020. Multi-criteria decision analysis in Bayesian networks - Diagnosing ecosystem service trade-offs in a
- 99 Basic, T., J. R. Britton, R. J. Cove, A. T. Ibbotson, and S. D. Gregory. 2018. Roles of discharge and temperature in recruitment of a cold-water fish, the European grayling *Thymallus thymallus*, near its southern range limit. *Ecology*
- 100 Bass, A. L., S. G. Hinch, D. A. Patterson, S. J. Cooke, and A. P. Farrell. 2018. Location-specific consequences of beach seine and gillnet capture on upriver-migrating sockeye salmon migration behavior and fate. *Canadian*
- 101 Bass, A., S. G. Hinch, M. T. Casselman, N. N. Bett, N. J. Burnett, C. T. Middleton, and D. A. Patterson. 2018. Visible gill-net injuries predict migration and spawning failure in adult sockeye salmon. *Transactions of the American*

- 102 Bassett, M. C., D. A. Patterson, and J. M. Shrimpton. 2018. Temporal and spatial differences in smolting among *Oncorhynchus nerka* populations throughout fresh and seawater migration. *Journal of Fish Biology* 93:510-518.
- 103 Bateman, D. S., N. D. Chelgren, R. E. Gresswell, J. B. Dunham, D. P. Hockman-Wert, D. W. Leer, and K. D. Bladon. 2021. Fish response to successive clearcuts in a second-growth forest from the central Coast range of Oregon.
- 104 Battin, J., M. W. Wiley, M. H. Ruckelshaus, R. N. Palmer, E. Korb, K. K. Bartz, and H. Imaki. 2007. Projected impacts of climate change on salmon habitat restoration. *Proceedings of the National Academy of Sciences of the United States of America* 104:1111-1116.
- 105 Battle, L., H. Y. Chang, C. S. Tzeng, and H. J. Lin. 2020. Modeling the impact of dam removal on the Formosan landlocked salmon in the context of climate change. *Aquatic Sciences* 82.
- 106 Beakes, M. P., J. W. Moore, S. A. Hayes, and S. M. Sogard. 2014. Wildfire and the effects of shifting stream channels on steelhead trout (*Oncorhynchus mykiss*) in the Klamath River, California. *North American Journal of Fisheries Management* 34:111-121.
- 107 Beakes, M. P., W. H. Satterthwaite, E. M. Collins, D. R. Swank, J. E. Merz, R. G. Titus, S. M. Sogard, and M. Mangel. 2010. Smolt transformation in two California steelhead populations: Effects of temporal variability in growth. *Journal of Fish Biology* 76:111-121.
- 108 Beamish, R. J. 2017. What the past tells us about the future of Pacific salmon research. *Fish and Fisheries* 18:1161-1170.
- 109 Beamish, R. J., B. E. Riddell, K. L. Lange, E. F. Jr., S. Kang, T. Nagasawa, V. Radchenko, O. Temnykh, and S. Urawa. 2009. A long-term research and monitoring plan (LRMP) for Pacific salmon (*Oncorhynchus* spp.) in the North Pacific Ocean. Special Publication No. 1. North Pacific Anadromous Fish Commission, Vancouver, British Columbia.
- 110 Beamish, R. J., K. L. Lange, B. E. Riddell, and S. Urawa. 2009. Climate impacts on Pacific salmon: Bibliography. Special Publication No. 2. North Pacific Anadromous Fish Commission, Vancouver, British Columbia. Available at: <http://www.npacfish.org/publications/>
- 111 Beauchamp, D. A. 2009. Bioenergetic ontogeny: Linking climate and mass-specific feeding to life-cycle growth and survival of salmon. *American Fisheries Society Symposium* 70:1-20.
- 112 Beaugrand, G., and P. C. Reid. 2012. Relationships between North Atlantic salmon, plankton, and hydroclimatic change in the Northeast Atlantic. *ICES Journal of Marine Science* 69:1549-1562.
- 113 Beaupre, J., J. Boudreault, N. E. Bergeron, and A. St-Hilaire. 2020. Inclusion of water temperature in a fuzzy logic Atlantic salmon (*Salmo salar*) parr habitat model. *Journal of Thermal Biology* 87.
- 114 Beckman, B. R., and W. W. Dickhoff. 1998. Plasticity of smolting in spring chinook salmon: Relation to growth and insulin-like growth factor-I. *Journal of Fish Biology* 53:808-826.
- 115 Bednarsek, N., and M. D. Ohman. 2015. Changes in pteropod distributions and shell dissolution across a frontal system in the California Current System. *Marine Ecology Progress Series* 523:93-103.
- 116 Bednarsek, N., G. A. Tarling, D. C. E. Bakker, S. Fielding, E. M. Jones, H. J. Venables, P. Ward, A. Kuzirian, B. Leze, R. A. Feely, and E. J. Murphy. 2012. Extensive dissolution of live pteropods in the Southern Ocean. *Nature* 486:269-272.
- 117 Bednarsek, N., G. Pelletier, A. Ahmed, and R. A. Feely. 2020. Chemical Exposure Due to Anthropogenic Ocean Acidification Increases Risks for Estuarine Calcifiers in the Salish Sea: Biogeochemical Model Scenarios. *Frontiers in Marine Science* 7:1-12.
- 118 Bednarsek, N., J. A. Newton, M. W. Beck, S. R. Alin, R. A. Feely, N. R. Christman, and T. Klinger. 2021. Severe biological effects under present-day estuarine acidification in the seasonally variable Salish Sea. *Science of the Total Environment* 768:145311.
- 119 Beebe, B. A., K. T. Bentley, T. W. Buehrens, R. W. Perry, and J. B. Armstrong. 2021. Evaluating Fish Rescue as a Drought Adaptation Strategy Using a Life Cycle Modeling Approach for Imperiled Coho Salmon. *North American Journal of Fisheries Management* 41:111-121.
- 120 Beechie, T. J., C. Nicol, C. Fogel, J. Jorgensen, and B. Timpane-Padgham. 2021. Chum Salmon Life-Cycle Model Description and Results for the Chehalis River Basin. *North American Journal of Fisheries Management* 41:111-121.
- 121 Beechie, T. J., C. Nicol, C. Fogel, J. Jorgensen, J. Thompson, G. Seixas, J. Chamberlin, J. Hall, B. Timpane-Padgham, P. Kiffney, S. Kubo, and J. Keaton. 2021. Chehalis Life-cycle Modeling Phase 1 report. United States. National Oceanic and Atmospheric Administration.
- 122 Beechie, T. J., H. Moir, and G. Pess. 2008. Hierarchical physical controls on salmonid spawning location and timing. Pages 83-102 in D. S. a. P. DeVries, editor. *Salmonid spawning habitat in rivers: physical controls, biological responses, and approaches to remediation*. American Fisheries Society, Symposium 65, Bethesda, Maryland.
- 123 Beechie, T. J., O. Stefankiv, M. Bond, and M. Pollock. 2021. Modeling riparian species occurrence from historical surveys to guide restoration planning in northwestern USA. *Ecosphere* 12.
- 124 Beechie, T., H. Imaki, J. Greene, A. Wade, H. Wu, G. Pess, P. Roni, J. Kimball, J. Stanford, P. Kiffney, and N. Mantua. 2012. Restoring salmon habitat for a changing climate. *River Research and Applications* 29:939-960.
- 125 Beer, W. N., and E. A. Steel. 2018. Impacts and implications of temperature variability on Chinook salmon egg development and emergence phenology. *Transactions of the American Fisheries Society* 147:3-15.
- 126 Beer, W. N., and J. J. Anderson. 2011. Sensitivity of juvenile salmonid growth to future climate trends. *River Research and Applications* 27:111-121.
- 127 Beer, W. N., and J. J. Anderson. 2013. Sensitivity of salmonid freshwater life history in western US streams to future climate conditions. *Global Change Biology* 19:2547-2556.

- 128 Beever, E. A., J. O'Leary, C. Mengelt, J. M. West, S. Julius, N. Green, D. Magness, L. Petes, B. Stein, A. B. Nicotra, J. J. Hellmann, A. L. Robertson, M. D. Staudinger, A. A. Rosenberg, E. Babij, J. Brennan, G. W. Schuurman, and G. E. Hofmann. 2016. Improving conservation outcomes with a new paradigm for understanding species' fundamental
- 129 Bell, D. A., R. P. Kovach, S. C. Vulstek, J. E. Joyce, and D. A. Tallmon. 2017. Climate-induced trends in predator–prey synchrony differ across life-history stages of an anadromous salmonid. *Canadian Journal of Fisheries and Aquatic*
- 130 Bell, D. A., R. P. Kovach, Z. L. Robinson, A. R. Whiteley, and T. E. Reed. 2021. The ecological causes and consequences of hard and soft selection. *Ecology Letters* 24:1505-1521.
- 131 Bell, E., S. M. Albers, J. M. Krug, and R. Dagit. 2011. Juvenile growth in a population of southern California steelhead (*Oncorhynchus mykiss*). *California Fish and Game* 97:25-35.
- 132 Bellgraph, B. J., C. Baldwin, L. Garavelli, Z. Haque, W. Perkins, M. Richmond, M. Howell, and J. McLellan. 2020. Estimates of Chinook Salmon Spawning Habitat in a Blocked Reach of the Columbia River Upstream of Grand
- 133 Bellgraph, B. J., G. A. McMichael, R. P. Mueller, and J. L. Monroe. 2010. Behavioural response of juvenile Chinook salmon *Oncorhynchus tshawytscha* during a sudden temperature increase and implications for survival. *Journal of*
- 134 Bellmore, J. R., C. V. Baxter, K. Martens, and P. J. Connolly. 2013. The floodplain food web mosaic: A study of its importance to salmon and steelhead with implications for their recovery. *Ecological Applications* 23:189-207.
- 135 Bellmore, J. R., J. R. Benjamin, M. Newsom, J. A. Bountry, and D. Dombroski. 2017. Incorporating food web dynamics into ecological restoration: a modeling approach for river ecosystems. *Ecol Appl* 27:814-832.
- 136 Benbow, M. E., J. P. Receveur, and G. A. Lamberti. 2020. Death and Decomposition in Aquatic Ecosystems.
- 137 Benda, S. E., G. P. Naughton, C. C. Caudill, M. L. Kent, and C. B. Schreck. 2015. Cool, Pathogen-Free Refuge Lowers Pathogen-Associated Prespawn Mortality of Willamette River Chinook Salmon. *Transactions of the American*
- 138 Bendall, B., A. Moore, D. Maxwell, P. Davison, N. Edmonds, D. Archer, D. Solomon, V. Greest, R. Wyatt, and K. Broad. 2012. Modelling the migratory behaviour of salmonids in relation to environmental and physiological
- 139 Benjamin, J. R., D. T. Vidergar, and J. B. Dunham. 2020. Thermal heterogeneity, migration, and consequences for spawning potential of female bull trout in a river-reservoir system. *Ecology and Evolution* 10:4128-4142.
- 140 Benjamin, J. R., P. J. Connolly, J. G. Romine, and R. Perry. 2013. Potential effects of changes in temperature and food resources on life history trajectories of juvenile *Oncorhynchus mykiss*. *Transactions of the American Fisheries*
- 141 Benjankar, R., D. Tonina, J. A. McKean, M. M. Sohrabi, Q. W. Chen, and D. Vidergar. 2018. Dam operations may improve aquatic habitat and offset negative effects of climate change. *Journal of Environmental Management*
- 142 Bentley, K. T., and R. L. Burgner. 2011. An assessment of parasite infestation rates of juvenile sockeye salmon after 50 years of climate warming in southwest Alaska. *Environmental Biology of Fishes* 92:267-273.
- 143 Berdahl, A., P. A. H. Westley, and T. P. Quinn. 2017. Social interactions shape the timing of spawning migrations in an anadromous fish. *Animal Behaviour* 126:221-229.
- 144 Berejikian, B. A., C. P. Tatara, D. M. Van Doornik, M. A. Humling, M. R. Cooper, C. R. Pasley, and J. J. Atkins. 2020. Duration in captivity affects competitive ability and breeding success of male but not female steelhead trout (*Oncorhynchus mykiss*). *Canadian Journal of Fisheries and Aquatic Sciences* 77:1000-1009.
- 145 Berejikian, B. A., L. A. Campbell, and M. E. Moore. 2013. Large-scale freshwater habitat features influence the degree of anadromy in eight Hood Canal *Oncorhynchus mykiss* populations. *Canadian Journal of Fisheries and*
- 146 Berkman, S. A., T. M. Sutton, F. J. Mueter, and B. W. Elliott. 2021. Effects of early- life stage and environmental factors on the freshwater and marine survival of Chinook salmon (*Oncorhynchus tshawytscha*) in rivers of
- 147 Bernard, B., I. Leguen, S. N. M. Mandiki, V. Cornet, B. Redivo, and P. Kestemont. 2020. Impact of temperature shift on gill physiology during smoltification of Atlantic salmon smolts (*Salmo salar* L.). *Comparative Biochemistry and*
- 148 Bernas, R., A. Was-Barcz, M. Arnyasi, P. Debowski, G. Radtke, A. Pocwierz-Kotus, and P. Berrebi. 2021. Evidence of unidirectional gene flow in a fragmented population of *Salmo trutta* L. *Scientific Reports* 11.
- 149 Bett, N. N., S. G. Hinch, A. L. Bass, D. C. Braun, N. J. Burnett, M. T. Casselman, S. J. Cooke, S. M. Drenner, A. Gelchu, W. L. Harrower, R. Ledoux, A. G. Lotto, C. T. Middleton, V. Minke-Martin, D. A. Patterson, W. M. Zhang, and D. Z. Zhu. 2022. Using an integrative research approach to improve fish migrations in regulated rivers: a case study on
- 150 Beveridge, O. S., O. L. Petchey, and S. Humphries. 2010. Direct and indirect effects of temperature on the population dynamics and ecosystem functioning of aquatic microbial ecosystems. *Journal of Animal Ecology*
- 151 Bi, H. S., W. T. Peterson, and P. T. Strub. 2011. Transport and coastal zooplankton communities in the northern California Current system. *Geophysical Research Letters* 38:L12607.
- 152 Bi, H. S., W. T. Peterson, J. Lamb, and E. Casillas. 2011. Copepods and salmon: Characterizing the spatial distribution of juvenile salmon along the Washington and Oregon coast, USA. *Fisheries Oceanography* 20:125-138.

- 153 Bignami, S., I. C. Enochs, D. P. Manzello, S. Sponaugle, and R. K. Cowen. 2013. Ocean acidification alters the otoliths of a pantropical fish species with implications for sensory function. *Proceedings of the National Academy*
- 154 Bille, R., R. Kelly, A. Biastoch, E. Harrould-Kolieb, D. Herr, F. Joos, K. Kroeker, D. Laffoley, A. Oschlies, and J. P. Gattuso. 2013. Taking action against ocean acidification: A review of management and policy options.
- 155 Bilous, M., and K. Dunmall. 2020. Atlantic salmon in the Canadian Arctic: potential dispersal, establishment, and interaction with Arctic char. *Reviews in Fish Biology and Fisheries* 30:463-483.
- 156 Birk, S., D. Chapman, L. Carvalho, B. M. Spears, H. E. Andersen, C. Argillier, S. Auer, A. Baattrup-Pedersen, L. Banin, M. Beklioglu, E. Bondar-Kunze, A. Borja, P. Branco, T. Bucak, A. D. Buijse, A. C. Cardoso, R. M. Couture, F. Cremona, D. de Zwart, C. K. Feld, M. T. Ferreira, H. Feuchtmayr, M. O. Gessner, A. Gieswein, L. Globevnik, D. Graeber, W. Graf, C. Gutierrez-Canovas, J. Hanganu, U. Iskin, M. Jarvinen, E. Jeppesen, N. Kotamaki, M. Kuijper, J. U. Lemm, S. L. Lu, A. L. Solheim, U. Mischke, S. J. Moe, P. Noges, T. Noges, S. J. Ormerod, Y. Panagopoulos, G. Phillips, L. Posthuma, S. Pouso, C. Prudhomme, K. Rankinen, J. J. Rasmussen, J. Richardson, A. Sagouis, J. M. Santos, R. B. Schafer, R. Schinegger, S. Schmutz, S. C. Schneider, L. Schulting, P. Segurado, K. Stefanidis, B. Sures, S.
- 157 Bisson, P. A., J. B. Dunham, and G. H. Reeves. 2009. Freshwater ecosystems and resilience of Pacific salmon: Habitat management based on natural variability. *Ecology and Society* 14:Available at:
- 158 Bjerck, H. B., H. A. Urke, T. O. Haugen, J. A. Alfredsen, J. B. Ulvund, and T. Kristensen. 2021. Synchrony and multimodality in the timing of Atlantic salmon smolt migration in two Norwegian fjords. *Scientific Reports* 11.
- 159 Bjork, S. J., Y. A. Zhang, C. N. Hurst, M. E. Alonso-Naveiro, J. D. Alexander, J. O. Sunyer, and J. L. Bartholomew. 2014. Defenses of susceptible and resistant Chinook salmon (*Onchorhynchus tshawytscha*) against the myxozoan
- 160 Bjornas, K. L., S. F. Railsback, O. Calles, and J. J. Piccolo. 2021. Modeling Atlantic salmon (*Salmo salar*) and brown trout (*S. trutta*) population responses and interactions under increased minimum flow in a regulated river.
- 161 Bjornsson, B. T., S. O. Stefansson, and S. D. McCormick. 2011. Environmental endocrinology of salmon smoltification. *General and Comparative Endocrinology* 170:290-298.
- 162 Black, B. A., I. D. Schroeder, W. J. Sydeman, S. J. Bograd, and P. W. Lawson. 2010. Wintertime ocean conditions synchronize rockfish growth and seabird reproduction in the central California Current Ecosystem. *Canadian*
- 163 Black, B. A., I. D. Schroeder, W. J. Sydeman, S. J. Bograd, B. K. Wells, and F. B. Schwing. 2011. Winter and summer upwelling modes and their biological importance in the California Current Ecosystem. *Global Change Biology*
- 164 Blair, J. M., I. Ostrovsky, B. J. Hicks, R. J. Pitkethley, and P. Scholes. 2013. Growth of rainbow trout (*Oncorhynchus mykiss*) in warm-temperate lakes: Implications for environmental change. *Canadian Journal of Fisheries and*
- 165 Blair, S. D., and C. N. Glover. 2019. Acute exposure of larval rainbow trout (*Oncorhynchus mykiss*) to elevated temperature limits hsp70b expression and influences future thermotolerance. *Hydrobiologia* 836:155-167.
- 166 Blair, S., C. Barlow, E. Martin, R. Schumaker, and J. McIntyre. 2020. Methemoglobin determination by multi-component analysis in coho salmon (*Oncorhynchus kisutch*) possessing unstable hemoglobin. *Methods* 7.
- 167 Blanchard, J. L., S. Jennings, R. Holmes, J. Harle, G. Merino, J. I. Allen, J. Holt, N. K. Dulvy, and M. Barange. 2012. Potential consequences of climate change for primary production and fish production in large marine ecosystems. *Philosophical Transactions of the Royal Society B-Biological Sciences* 367:2979-2989.
- 168 Blewett, T. A., A. Boyd, E. J. Folkerts, K. N. Snihur, D. S. Alessi, and G. Goss. 2021. Effect of temperature on phenanthrene accumulation from hydraulic fracturing flowback and produced water in rainbow trout
- 169 Bloomer, J., D. Sear, and P. Kemp. 2019. Does variation in egg structure among five populations of Atlantic salmon (*Salmo salar*) influence their survival in low oxygen conditions? *Royal Society Open Science* 6:12.
- 170 Blum, A. G., Y. Kanno, and B. H. Letcher. 2018. Seasonal streamflow extremes are key drivers of Brook Trout young-of-the-year abundance. *Ecosphere* 9:e02356.
- 171 Boe, K., M. J. Robertson, I. A. Fleming, and M. Power. 2020. Evaluating the effect of dorsal muscle biopsies on adult Atlantic salmon growth and marine return rates. *Conservation Physiology* 8.
- 172 Boe, K., M. Power, M. J. Robertson, C. J. Morris, J. B. Dempson, C. C. Parrish, and I. A. Fleming. 2020. Influence of life-history-dependent migration strategies on Atlantic salmon diets. *Ices Journal of Marine Science* 77:345-358.
- 173 Boessow, S. N., H. A. Beecher, and K. K. Gates. 2021. Spawning habitat suitability for coastal cutthroat trout: Microhabitat and mesohabitat. *Aquatic Conservation-Marine and Freshwater Ecosystems* 31:480-493.
- 174 Bograd, S. J., E.L. Hazen, E.A. Howell, and A. B. Hollowed. 2014. The fate of fisheries oceanography: Introduction to the special issue. *Oceanography* 27:21-25.
- 175 Bohling, J., J. Von Bargen, and P. Bahls. 2020. Genomic Characterization of Coho Salmon Spawning Populations from the Hood Canal. *Transactions of the American Fisheries Society* 149:3-13.

- 176 Boldt, J. L., E. L. Hazen, M. E. Hunsicker, C. H. Fu, R. I. Perry, and X. J. Shan. 2021. Quantifying ecosystem responses to environmental and human pressures in the marine ecosystem off the west coast of Vancouver Island. *Ecological*
- 177 Boldt, J. L., R. Martone, J. Samhuri, R. I. Perry, S. Itoh, I. K. Chung, M. Takahashi, and N. Yoshie. 2014. Developing ecosystem indicators for responses to multiple stressors. *Oceanography* 27:116-133.
- 178 Bolscher, T., E. van Slobbe, M. T. H. van Vliet, and S. E. Werners. 2013. Adaptation turning points in river restoration? The Rhine salmon case. *Sustainability* 5:2288-2304.
- 179 Boltana, S., N. Sanhueza, A. Aguilar, C. Gallardo-Escarate, G. Arriagada, J. A. Valdes, D. Soto, and R. A. Quinones. 2017. Influences of thermal environment on fish growth. *Ecol Evol* 7:6814-6825.
- 180 Bond, M. H., P. A. H. Westley, A. H. Dittman, D. Holecek, T. Marsh, and T. P. Quinn. 2016. Combined effects of barge transportation, river environment, and rearing location on straying and migration of adult Snake River fall-
- 181 Bond, R. M., C. L. Nicol, J. D. Kiernan, and B. C. Spence. 2019. Occurrence, fate, and confounding influence of ghost passive integrated transponder tags in an intensively monitored watershed. *Canadian Journal of Fisheries*
- 182 Bond, R. M., J. D. Kiernan, A. M. K. Osterback, C. H. Kern, A. E. Hay, J. M. Meko, M. E. Daniels, and J. M. Perez. 2021. Spatiotemporal Variability in Environmental Conditions Influences the Performance and Behavior of Juvenile
- 183 Booth, M. T. 2020. Patterns and Potential Drivers of Steelhead Smolt Migration in Southern California. *North American Journal of Fisheries Management* 40:1032-1050.
- 184 Bordeleau, X., S. A. Pardo, G. Chaput, J. April, B. Dempson, M. Robertson, A. Levy, R. Jones, J. A. Hutchings, F. G. Whoriskey, and G. T. Crossin. 2020. Spatio-temporal trends in the importance of iteroparity across Atlantic salmon
- 185 Borgwardt, F., G. Unfer, S. Auer, K. Waldner, M. El-Matbouli, and T. Bechter. 2020. Direct and Indirect Climate Change Impacts on Brown Trout in Central Europe: How Thermal Regimes Reinforce Physiological Stress and
- 186 Borstad, G., W. Crawford, J. M. Hipfner, R. Thomson, and K. Hyatt. 2011. Environmental control of the breeding success of rhinoceros auklets at Triangle Island, British Columbia. *Marine Ecology-Progress Series* 424:285-302.
- 187 Botsford, L. W., M. D. Holland, J. C. Field, and A. Hastings. 2014. Cohort resonance: a significant component of fluctuations in recruitment, egg production, and catch of fished populations. *Ices Journal of Marine Science*
- 188 Botsford, L. W., M. D. Holland, J. F. Samhuri, J. W. White, and A. Hastings. 2011. Importance of age structure in models of the response of upper trophic levels to fishing and climate change. *Ices Journal of Marine Science*
- 189 Boughton, D. A., and A. S. Pike. 2013. Floodplain rehabilitation as a hedge against hydroclimatic uncertainty in a migration corridor of threatened steelhead. *Conservation Biology* 27:1158-1168.
- 190 Boughton, D. A., L. R. Harrison, S. N. John, R. M. Bond, C. L. Nicol, C. J. Legleiter, and R. T. Richardson. 2022. Capacity of Two Sierra Nevada Rivers for Reintroduction of Anadromous Salmonids: Insights from a High-
- 191 Boughton, D. A., M. Gibson, R. Yedor, and E. Kelley. 2007. Stream temperature and the potential growth and survival of juvenile *Oncorhynchus mykiss* in a southern California Creek. *Freshwater Biology* 52:1353-1364.
- 192 Bowden, T. J. 2008. Modulation of the immune system of fish by their environment. *Fish & Shellfish Immunology*
- 193 Bowen, A., G. Rollwagen-Bollens, S. M. Bollens, and J. Zimmerman. 2015. Feeding of the invasive copepod *Pseudodiaptomus forbesi* on natural microplankton assemblages within the lower Columbia River. *Journal of*
- 194 Bowen, L., V. R. von Biela, S. D. McCormick, A. M. Regish, S. C. Waters, B. Durbin-Johnson, M. Britton, M. L. Settles, D. S. Donnelly, S. M. Laske, M. P. Carey, R. J. Brown, and C. E. Zimmerman. 2020. Transcriptomic response to elevated water temperatures in adult migrating Yukon River Chinook salmon (*Oncorhynchus tshawytscha*).
- 195 Bowerman, T. E., M. L. Keefer, and C. C. Caudill. 2021. Elevated stream temperature, origin, and individual size influence Chinook salmon prespawn mortality across the Columbia River Basin. *Fisheries Research* 237.
- 196 Bowerman, T., A. Roumasset, M. L. Keefer, C. S. Sharpe, and C. C. Caudill. 2018. Prespawn mortality of female Chinook salmon increases with water temperature and percent hatchery origin. *Transactions of the American*
- 197 Bowersox, B. J., M. P. Corsi, J. L. McCormick, T. Copeland, and M. R. Campbell. 2019. Examining Life History Shifts and Genetic Composition in a Hatchery Steelhead Population, with Implications for Fishery and Ocean Selection.
- 198 Boyd, J. W., C. S. Guy, T. B. Horton, and S. A. Leathe. 2010. Effects of catch-and-release angling on salmonids at elevated water temperatures. *North American Journal of Fisheries Management* 30:898-907.
- 199 Bracis, C., and J. J. Anderson. 2013. Inferring the relative oceanic distribution of salmon from patterns in age-specific arrival timing. *Transactions of the American Fisheries Society* 142:556-567.
- 200 Braden, L. M., G. Prosperi-Porta, E. Kim, and S. R. M. Jones. 2010. *Tetracapsuloides bryosalmonae* in spawning pink salmon, *Oncorhynchus gorbuscha* (Walbaum), in the Quinsam River, British Columbia, Canada. *Journal of Fish*
- 201 Bradford, M. J. 2022. Assessment and management of effects of large hydropower projects on aquatic ecosystems in British Columbia, Canada. *Hydrobiologia* 849:443-459.



- 202 Bradford, M. J., J. Lovy, and D. A. Patterson. 2010. Infection of gill and kidney of Fraser River sockeye salmon, *Oncorhynchus nerka* (Walbaum), by *Parvicapsula minibicornis* and its effect on host physiology. *Journal of Fish*
- 203 Brady, R. X., N. S. Lovenduski, S. G. Yeager, M. C. Long, and K. Lindsay. 2020. Skillful multiyear predictions of ocean acidification in the California Current System. *Nature Communications* 11:2166.
- 204 Brandl, S., B. Schreier, J. L. Conrad, B. May, and M. Baerwald. 2021. Enumerating Predation on Chinook Salmon, Delta Smelt, and Other San Francisco Estuary Fishes Using Genetics. *North American Journal of Fisheries*
- 205 Braun, D. C., D. A. Patterson, and J. D. Reynolds. 2013. Maternal and environmental influences on egg size and juvenile life-history traits in Pacific salmon. *Ecology and Evolution* 3:1727-1740.
- 206 Breau, C., R. A. Cunjak, and S. J. Peake. 2011. Behaviour during elevated water temperatures: Can physiology explain movement of juvenile Atlantic salmon to cool water? *Journal of Animal Ecology* 80:844-853.
- 207 Brennan, S. R., D. E. Schindler, T. J. Cline, T. E. Walsworth, G. Buck, and D. P. Fernandez. 2019. Shifting habitat mosaics and fish production across river basins. *Science* 364:783-+.
- 208 Brewitt, K. S., and E. M. Danner. 2014. Spatio-temporal temperature variation influences juvenile steelhead (*Oncorhynchus mykiss*) use of thermal refuges. *Ecosphere* 5.
- 209 Brewitt, K. S., E. M. Danner, and J. W. Moore. 2017. Hot eats and cool creeks: juvenile Pacific salmonids use mainstem prey while in thermal refuges. *Canadian Journal of Fisheries and Aquatic Sciences* 74:1588-1602.
- 210 Brinkmann, M., S. Hudjetz, U. Kammann, M. Hennig, J. Kuckelkorn, M. Chinoraks, C. Cofalla, S. Wiseman, J. P. Giesy, A. Schaffer, M. Hecker, J. Wolz, H. Schuttrumpf, and H. Hollert. 2013. How flood events affect rainbow trout: Evidence of a biomarker cascade in rainbow trout after exposure to PAH contaminated sediment
- 211 Brodeur, R. D., E. A. Daly, R. A. Schabetsberger, and K. L. Mier. 2007. Interannual and interdecadal variability in juvenile coho salmon (*Oncorhynchus kisutch*) diets in relation to environmental changes in the northern California
- 212 Brodeur, R. D., J. C. Buchanan, and R. L. Emmett. 2014. Pelagic and demersal fish predators on juvenile and adult forage fish predators in the northern California Current: spatial and temporal variations. *California Cooperative*
- 213 Brodeur, R. D., M. E. Hunsicker, A. Hann, and T. W. Miller. 2019. Effects of warming ocean conditions on feeding ecology of small pelagic fishes in a coastal upwelling ecosystem: a shift to gelatinous food sources. *Marine Ecology*
- 214 Brodie, S., B. Abrahms, S. J. Bograd, G. Carroll, E. L. Hazen, B. A. Muhling, M. P. Buil, J. A. Smith, H. Welch, and M. G. Jacox. 2021. Exploring timescales of predictability in species distributions. *Ecography* 44:832-844.
- 215 Brooks, M. L., E. Fleishman, L. R. Brown, P. W. Lehman, I. Werner, N. Scholz, C. Mitchelmore, J. R. Lovvorn, M. L. Johnson, D. Schlenk, S. van Drunick, J. I. Drever, D. M. Stoms, A. E. Parker, and R. Dugdale. 2012. Life histories, salinity zones, and sublethal contributions of contaminants to pelagic fish declines illustrated with a case study of
- 216 Brophy, L. S., C. M. Greene, V. Hare, B. Holycross, A. Lanier, W. N. Heady, K. O'Connor, H. Imaki, T. Haddad, and R. Dana. 2019. Insights into estuary habitat loss in the western United States using a new method for mapping
- 217 Brosnan, I. G., D. W. Welch, E. L. Rechisky, and A. D. Porter. 2014. Evaluating the influence of environmental factors on yearling Chinook salmon survival in the Columbia River plume (USA). *Marine Ecology Progress Series*
- 218 Brown, C. A., D. Sharp, and T. C. M. Collura. 2016. Effect of climate change on water temperature and attainment of water temperature criteria in the Yaquina Estuary, Oregon (USA). *Estuarine Coastal and Shelf Science* 169:136-
- 219 Brown, C. J., B. Parker, M. D. Hocking, and J. D. Reynolds. 2020. Salmon abundance and patterns of forest greenness as measured by satellite imagery. *Science of the Total Environment* 725.
- 220 Brown, C. J., E. A. Fulton, A. J. Hobday, R. J. Matear, H. P. Possingham, C. Bulman, V. Christensen, R. E. Forrest, P. C. Gehrke, N. A. Gribble, S. P. Griffiths, H. Lozano-Montes, J. M. Martin, S. Metcalf, T. A. Okey, R. Watson, and A. J. Richardson. 2010. Effects of climate-driven primary production change on marine food webs: Implications for
- 221 Brown, R. J., C. Bradley, and J. L. Melegari. 2020. Population Trends for Chinook and Summer Chum Salmon in Two Yukon River Tributaries in Alaska. *Journal of Fish and Wildlife Management* 11:377-400.
- 222 Brown, R. S., W. A. Hubert, and S. F. Daly. 2011. A primer on winter, ice, and fish: What fisheries biologists should know about winter ice processes and stream-dwelling fish. *Fisheries* 36:8-26.
- 223 Bruneaux, M., M. Visse, R. Gross, L. Pukk, L. Saks, A. Vasemägi, and B. Tschirren. 2017. Parasite infection and decreased thermal tolerance: impact of proliferative kidney disease on a wild salmonid fish in the context of
- 224 Buchanan, R. A., and J. R. Skalski. 2020. Relating survival of fall-run Chinook Salmon through the San Joaquin Delta to river flow. *Environmental Biology of Fishes* 103:389-410.
- 225 Buchanan, R. A., E. Buttermore, and J. Israel. 2021. Outmigration survival of a threatened steelhead population through a tidal estuary. *Canadian Journal of Fisheries and Aquatic Sciences* 78:1869-1886.
- 226 Buchanan, R. A., P. L. Brandes, and J. R. Skalski. 2018. Survival of Juvenile Fall-Run Chinook Salmon through the San Joaquin River Delta, California, 2010-2015. *North American Journal of Fisheries Management* 38:663-679.

- 227 Buddendorf, W. B., F. L. Jackson, I. A. Malcolm, K. J. Millidine, J. Geris, M. E. Wilkinson, and C. Soulsby. 2019. Integration of juvenile habitat quality and river connectivity models to understand and prioritise the management of barriers for Atlantic salmon populations across spatial scales. *Science of the Total Environment* 655:557-566.
- 228 Buehrens, T. W., P. Kiffney, G. R. Pess, T. R. Bennett, S. M. Naman, G. Brooks, and T. P. Quinn. 2014. Increasing juvenile coho salmon densities during early recolonization have not affected resident coastal cutthroat trout growth, movement, or survival. *North American Journal of Fisheries Management* 34:892-907.
- 229 Bulmer, R. H., F. Stephenson, A. M. Lohrer, C. J. Lundquist, A. Madarasz-Smith, C. A. Pilditch, S. F. Thrush, and J. E. Hewitt. 2022. Informing the management of multiple stressors on estuarine ecosystems using an expert-based
- 230 Burge, C. A., and P. K. Hershberger. 2020. Climate change can drive marine diseases. *Marine Disease Ecology*:83-
- 231 Burge, C. A., C. M. Eakin, C. S. Friedman, B. Froelich, P. K. Hershberger, E. E. Hofmann, L. E. Petes, K. C. Prager, E. Weil, B. L. Willis, S. E. Ford, and C. D. Harvell. 2014. Climate change influences on marine infectious diseases: implications for management and society. *Annual Review of Marine Science*, Vol 6 6:249-277.
- 232 Burke, B. J., J. J. Anderson, and A. M. Baptista. 2014. Evidence for multiple navigational sensory capabilities of
- 233 Burke, B. J., M. C. Liermann, D. J. Teel, and J. J. Anderson. 2013. Environmental and geospatial factors drive juvenile Chinook salmon distribution during early ocean migration. *Canadian Journal of Fisheries and Aquatic*
- 234 Burke, B. J., W. T. Peterson, B. R. Beckman, C. Morgan, E. A. Daly, and M. Litz. 2013. Multivariate models of adult
- 235 Burman, A. J., R. D. Hedger, J. G. I. Hellstrom, A. G. Andersson, and L. E. Sundt-Hansen. 2021. Modelling the downstream longitudinal effects of frequent hydropeaking on the spawning potential and stranding susceptibility
- 236 Burnett, N. J., S. G. Hinch, D. C. Braun, M. T. Casselman, C. T. Middleton, S. M. Wilson, and S. J. Cooke. 2014. Burst swimming in areas of high flow: delayed consequences of anaerobiosis in wild adult sockeye salmon. *Physiological*
- 237 Burnett, N. J., S. G. Hinch, N. N. Bett, D. C. Braun, M. T. Casselman, S. J. Cooke, A. Gelchu, S. Lingard, C. T. Middleton, V. Minke-Martin, and C. F. H. White. 2017. Reducing carryover effects on the migration and spawning success of Sockeye salmon through a management experiment of dam flows. *River Research and Applications*
- 238 Burt, J. M., S. G. Hinch, and D. A. Patterson. 2012. Developmental temperature stress and parental identity shape offspring burst swimming performance in sockeye salmon (*Oncorhynchus nerka*). *Ecology of Freshwater Fish*
- 239 Burt, J. M., S. G. Hinch, and D. A. Patterson. 2012. Parental identity influences progeny responses to incubation thermal stress in sockeye salmon *Oncorhynchus nerka*. *Journal of Fish Biology* 80:444-462.
- 240 Busch, D. S., and P. McElhany. 2016. Estimates of the direct effect of seawater pH on the survival rate of species groups in the California Current Ecosystem. *Plos One* 11:28.
- 241 Busch, D. S., C. J. Harvey, and P. McElhany. 2013. Potential impacts of ocean acidification on the Puget Sound food web. *Ices Journal of Marine Science* 70:823-833.
- 242 Busch, D. S., C. M. Greene, and T. P. Good. 2013. Estimating effects of tidal power projects and climate change on threatened and endangered marine species and their food web. *Conservation Biology* 27:1190-1200.
- 243 Butler, M. B., R. L. Flitcroft, and G. Giannico. 2021. The relationship between hydroregime and coho salmon (*Oncorhynchus kisutch*) redd construction in the Smith River, Oregon. *Ecology of Freshwater Fish* 30:519-530.
- 244 Butryn, R. S., D. L. Parrish, and D. M. Rizzo. 2013. Summer stream temperature metrics for predicting brook trout (*Salvelinus fontinalis*) distribution in streams. *Hydrobiologia* 703:47-57.
- 245 Byron, C. J., A. J. Pershing, J. D. Stockwell, H. Xue, and J. Kocik. 2014. Migration model of post-smolt Atlantic salmon (*Salmo salar*) in the Gulf of Maine. *Fisheries Oceanography* 23:172-189.
- 246 Byron, C. J., and B. J. Burke. 2014. Salmon ocean migration models suggest a variety of population-specific strategies. *Reviews in Fish Biology and Fisheries* 24:737-756.
- 247 Camacho, C., and A. P. Hendry. 2020. Matching habitat choice: it's not for everyone. *Oikos* 129:689-699.
- 248 Camak, D. T., M. J. Osborne, and T. F. Turner. 2021. Population genomics and conservation of Gila Trout (*Oncorhynchus gilae*). *Conservation Genetics* 22:729-743.
- 249 Campbell, E. Y., J. B. Dunham, and G. H. Reeves. 2020. Linkages between temperature, macroinvertebrates, and young-of-year Coho Salmon growth in surface-water and groundwater streams. *Freshwater Science* 39:447-460.
- 250 Campbell, E. Y., J. B. Dunham, G. H. Reeves, and S. M. Wondzell. 2019. Phenology of hatching, emergence, and end-of-season body size in young-of-year coho salmon in thermally contrasting streams draining the Copper River Delta, Alaska. *Canadian Journal of Fisheries and Aquatic Sciences* 76:185-191.
- 251 Canales, T. M., R. Law, and J. L. Blanchard. 2016. Shifts in plankton size spectra modulate growth and coexistence of anchovy and sardine in upwelling systems. *Canadian Journal of Fisheries and Aquatic Sciences* 73:611-621.

- 252 Carey, M. P., C. E. Zimmerman, K. D. Keith, M. Schelske, C. Lean, and D. C. Douglas. 2017. Migration trends of sockeye salmon at the northern edge of their distribution. *Transactions of the American Fisheries Society* 146:791-
- 253 Carey, M. P., K. D. Keith, M. Schelske, C. Lean, S. D. McCormick, A. Regish, and C. E. Zimmerman. 2019. Energy Depletion and Stress Levels in Sockeye Salmon Migrating at the Northern Edge of their Distribution. *Transactions*
- 254 Carey, M. P., V. R. von Biela, A. Dunker, K. D. Keith, M. Schelske, C. Lean, and C. E. Zimmerman. 2021. Egg retention of high-latitude sockeye salmon (*Oncorhynchus nerka*) in the Pilgrim River, Alaska, during the Pacific
- 255 Carlson, A. K., W. W. Taylor, K. M. Hartikainen, D. M. Infante, T. D. Beard, and A. J. Lynch. 2017. Comparing stream-specific to generalized temperature models to guide salmonid management in a changing climate. *Reviews in Fish*
- 256 Carlson, A. K., W. W. Taylor, K. M. Schlee, T. G. Zorn, and D. M. Infante. 2017. Projected impacts of climate change on stream salmonids with implications for resilience-based management. *Ecology of Freshwater Fish* 26:190-204.
- 257 Carlson, L. G., T. F. Sheehan, M. D. Tillotson, and K. E. Mills. 2021. Date of marine annulus formation in Atlantic salmon (*Salmo salar*) and implications for retrospective growth analyses using scales. *Journal of Fish Biology*
- 258 Carlson, S. M., and T. R. Seamons. 2008. A review of quantitative genetic components of fitness in salmonids: Implications for adaptation to future change. *Evolutionary Applications* 1:222-238.
- 259 Carmichael, R. A., D. Tonina, E. R. Keeley, R. M. Benjankar, and K. E. See. 2020. Some like it slow: a bioenergetic evaluation of habitat quality for juvenile Chinook salmon in the Lemhi River, Idaho. *Canadian Journal of Fisheries*
- 260 Carnevale, C., D. A. Syme, and A. K. Gamperl. 2021. Effects of hypoxic acclimation, muscle strain, and contraction frequency on nitric oxide-mediated myocardial performance in steelhead trout (*Oncorhynchus mykiss*). *American Journal of Physiology-Regulatory Integrative and Comparative Physiology* 320:R588-R610.
- 261 Carnevale, C., J. C. Roberts, D. A. Syme, and A. K. Gamperl. 2020. Hypoxic acclimation negatively impacts the contractility of steelhead trout (*Oncorhynchus mykiss*) spongy myocardium. *American Journal of Physiology-*
- 262 Carothers, C., T. L. Sformo, S. Cotton, J. C. George, and P. A. H. Westley. 2019. Pacific Salmon in the Rapidly Changing Arctic: Exploring Local Knowledge and Emerging Fisheries in Utqiagvik and Nuiqsut, Alaska. *Arctic* 72:273-
- 263 Carr-Harris, C. N., J. W. Moore, A. S. Gottesfeld, J. A. Gordon, W. M. Shepert, J. D. J. Henry, H. J. Russell, W. N. B. Helin, D. J. Doolan, and T. D. Beacham. 2018. Phenological diversity of salmon smolt migration timing within a
- 264 Carreira, C., M. Heldal, and G. Bratbak. 2013. Effect of increased pCO<sub>2</sub> on phytoplankton-virus interactions.
- 265 Carrier-Belleau, C., L. Pascal, C. Nozais, and P. Archambault. 2021. Tipping points and multiple drivers in changing aquatic ecosystems: A review of experimental studies. *Limnology and Oceanography*.
- 266 Casselman, M. T., K. Anttila, and A. P. Farrell. 2012. Using maximum heart rate as a rapid screening tool to determine optimum temperature for aerobic scope in Pacific salmon *Oncorhynchus* spp. *Journal of Fish Biology*
- 267 Caudill, C. C., M. L. Keefer, T. S. Clabough, G. P. Naughton, B. J. Burke, and C. A. Peery. 2013. Indirect effects of impoundment on migrating fish: Temperature gradients in fish ladders slow dam passage by adult Chinook salmon
- 268 Cavole, L. M., A. M. Demko, R. E. Diner, A. Giddings, I. Koester, C. Pagniello, M. L. Paulsen, A. Ramirez-Valdez, S. M. Schwenck, N. K. Yen, M. E. Zill, and P. J. S. Franks. 2016. Biological impacts of the 2013-2015 warm-water anomaly
- 269 Caza-Allard, I., M. J. Mazerolle, L. N. Harris, B. K. Malley, R. F. Tallman, A. T. Fisk, and J. S. Moore. 2021. Annual survival probabilities of anadromous Arctic Char remain high and stable despite interannual differences in sea ice
- 270 Chalifour, L., D. C. Scott, M. MacDuffee, J. C. Iacarella, T. G. Martin, and J. K. Baum. 2019. Habitat use by juvenile salmon, other migratory fish, and resident fish species underscores the importance of estuarine habitat mosaics.
- 271 Chamberlin, J. W., J. Hall, W. T. Zackey, F. Leonetti, M. Rustay, and C. Rice. 2021. Spatial and Temporal Variability in Chinook Salmon Abundance Reflects Opportunity to Support Life History Diversity in an Estuarine Landscape.
- 272 Chaparro-Pedraza, P. C. 2021. Fast environmental change and eco-evolutionary feedbacks can drive regime shifts in ecosystems before tipping points are crossed. *Proceedings of the Royal Society B-Biological Sciences* 288.
- 273 Chapman, J. M., A. K. Teffer, A. L. Bass, S. G. Hinch, D. A. Patterson, K. M. Miller, and S. J. Cooke. 2020. Handling, infectious agents and physiological condition influence survival and post-release behaviour in migratory adult
- 274 Chapman, J. M., R. J. Lennox, W. M. Twardek, A. K. Teffer, M. J. Robertson, K. M. Miller, and S. J. Cooke. 2021. Serial sampling reveals temperature associated response in transcription profiles and shifts in condition and infectious agent communities in wild Atlantic salmon. *Freshwater Biology* 66:2086-2104.
- 275 Chaput, G., and H. P. Benoit. 2012. Evidence for bottom-up trophic effects on return rates to a second spawning for Atlantic salmon (*Salmo salar*) from the Miramichi River, Canada. *Ices Journal of Marine Science* 69:1656-1667.
- 276 Chasco, B. E., I. C. Kaplan, A. C. Thomas, A. Acevedo-Gutiérrez, D. P. Noren, M. J. Ford, M. B. Hanson, J. J. Scordino, S. J. Jeffries, K. N. Marshall, A. O. Shelton, C. Matkin, B. J. Burke, and E. J. Ward. 2017. Competing tradeoffs between increasing marine mammal predation and fisheries harvest of Chinook salmon. *Scientific Reports*

- 277 Chasco, B., B. Burke, L. Crozier, and R. Zabel. 2021. Differential impacts of freshwater and marine covariates on wild and hatchery Chinook salmon marine survival. *Plos One* 16.
- 278 Chavarie, L., J. B. Dempson, C. J. Schwarz, J. D. Reist, G. Power, and M. Power. 2010. Latitudinal variation in growth among Arctic charr in eastern North America: Evidence for countergradient variation? *Hydrobiologia* 650:161-177.
- 279 Checkley, D. M., Jr., A. G. Dickson, M. Takahashi, J. A. Radich, N. Eisenkolb, and R. Asch. 2009. Elevated CO<sub>2</sub> enhances otolith growth in young fish. *Science* 324:1683.
- 280 Chen, E. K., and M. J. Henderson. 2021. Reduced recruitment of Chinook salmon in a leveed bar-built estuary. *Canadian Journal of Fisheries and Aquatic Sciences* 78:894-904.
- 281 Chen, M. F., S. M. O'Neill, A. J. Carey, R. H. Conrad, B. A. Stewart, K. R. Snekvik, G. M. Ylitalo, and P. K. Hershberger. 2018. Infection by *Nanophyetus salmincola* and toxic contaminant exposure in out-migrating steelhead from Puget Sound, Washington: Implications for early marine survival. *Journal of Aquatic Animal Health*
- 282 Chen, Y., Y. C. Bai, X. L. Hu, X. F. Yang, and S. G. Xu. 2020. Energy metabolism responses in muscle tissue of rainbow trout *Oncorhynchus mykiss* fry to CO<sub>2</sub>-induced aquatic acidification based on metabolomics. *Aquatic*
- 283 Chen, Z. Q., A. P. Farrell, A. Matala, N. Hoffman, and S. R. Narum. 2018. Physiological and genomic signatures of evolutionary thermal adaptation in redband trout from extreme climates. *Evolutionary Applications* 11:1686-
- 284 Chen, Z. Q., and S. R. Narum. 2021. Whole genome resequencing reveals genomic regions associated with thermal adaptation in redband trout. *Molecular Ecology* 30:162-174.
- 285 Chen, Z. Q., M. Snow, C. S. Lawrence, A. R. Church, S. R. Narum, R. H. Devlin, and A. P. Farrell. 2015. Selection for upper thermal tolerance in rainbow trout (*Oncorhynchus mykiss* Walbaum). *Journal of Experimental Biology*
- 286 Chen, Z., K. Anttila, J. Wu, C. K. Whitney, S. G. Hinch, and A. P. Farrell. 2013. Optimum and maximum temperatures of sockeye salmon (*Oncorhynchus nerka*) populations hatched at different temperatures. *Canadian*
- 287 Cheung, W. W. L., and T. L. Frolicher. 2020. Marine heatwaves exacerbate climate change impacts for fisheries in the northeast Pacific. *Sci Rep* 10:6678.
- 288 Cheung, W. W. L., J. Dunne, J. L. Sarmiento, and D. Pauly. 2011. Integrating ecophysiology and plankton dynamics into projected maximum fisheries catch potential under climate change in the Northeast Atlantic. *ICES Journal of*
- 289 Cheung, W. W. L., J. Pinnegar, G. Merino, M. C. Jones, and M. Barange. 2012. Review of climate change impacts on marine fisheries in the UK and Ireland. *Aquatic Conservation-Marine and Freshwater Ecosystems* 22:368-388.
- 290 Cheung, W. W. L., V. W. Y. Lam, J. L. Sarmiento, K. Kearney, R. E. G. Watson, D. Zeller, and D. Pauly. 2010. Large-scale redistribution of maximum fisheries catch potential in the global ocean under climate change. *Global Change*
- 291 Chittaro, P. M., J. C. Hegg, B. P. Kennedy, L. A. Weitkamp, L. L. Johnson, C. Bucher, and R. W. Zabel. 2019. Juvenile river residence and performance of Snake River fall Chinook salmon. *Ecology of Freshwater Fish* 28:396-410.
- 292 Chittaro, P. M., R. W. Zabel, K. Haight, B. L. Sanderson, and B. P. Kennedy. 2014. Spatial and temporal patterns of growth and consumption by juvenile spring/summer Chinook salmon *Oncorhynchus tshawytscha*. *Environmental*
- 293 Chittaro, P., L. Johnson, D. Teel, P. Moran, S. Sol, K. Macneale, and R. Zabel. 2018. Variability in the performance of juvenile Chinook salmon is explained primarily by when and where they resided in estuarine habitats. *Ecology*
- 294 Chittenden, C. M., J. L. A. Jensen, D. Ewart, S. Anderson, S. Balfry, E. Downey, A. Eaves, S. Saksida, B. Smith, S. Vincent, D. Welch, and R. S. McKinley. 2010. Recent salmon declines: A result of lost feeding opportunities due to
- 295 Chittenden, C. M., R. J. Beamish, and R. S. McKinley. 2009. A critical review of Pacific salmon marine research relating to climate. *Ices Journal of Marine Science* 66:2195-2204.
- 296 Chittenden, C. M., R. Sweeting, C. M. Neville, K. Young, M. Galbraith, E. Carmack, S. Vagle, M. Dempsey, J. Eert, and R. J. Beamish. 2018. Estuarine and marine diets of out-migrating Chinook Salmon smolts in relation to local zooplankton populations, including harmful blooms. *Estuarine Coastal and Shelf Science* 200:335-348.
- 297 Chiu, M. C., S. H. Chang, Y. T. Yen, L. Y. Liao, and H. J. Lin. 2021. Timing and magnitude of climatic extremes differentially elevate mortality but enhance recovery in a fish population. *Global Change Biology* 27:6117-6128.
- 298 Christensen, C., M. W. Jacobsen, R. Nygaard, and M. M. Hansen. 2018. Spatiotemporal genetic structure of anadromous Arctic char (*Salvelinus alpinus*) populations in a region experiencing pronounced climate change.
- 299 Christensen, D. R., and B. C. Moore. 2010. Largemouth bass consumption demand on hatchery rainbow trout in two Washington lakes. *Lake and Reservoir Management* 26:200-211.
- 300 Christianson, K. R., and B. M. Johnson. 2020. Combined effects of early snowmelt and climate warming on mountain lake temperatures and fish energetics. *Arctic Antarctic and Alpine Research* 52:130-145.
- 301 Ciani, E., K. von Krogh, R. Nourizadeh-Lillabadi, I. Mayer, R. Fontaine, and F. A. Weltzien. 2021. Sexual maturation in Atlantic salmon male parr may be triggered both in late summer and early spring under standard farming

- 302 Cimino, M. A., J. A. Santora, I. Schroeder, W. Sydeman, M. G. Jacox, E. L. Hazen, and S. J. Bograd. 2020. Essential krill species habitat resolved by seasonal upwelling and ocean circulation models within the large marine
- 303 Clabough, T. S., C. C. Caudill, C. A. Peery, T. C. Bjornn, and L. C. Stuehrenberg. 2006. Associations between adult salmon and steelhead body temperature during upstream migration and estimated environmental temperatures in Lower Granite Reservoir during cold water releases from Dworshak Reservoir, 2001-2002. Report for U.S. Army Corps of Engineers, Technical Report 2006-4:Available at:
- 304 Clabough, T. S., C. C. Caudill, M. L. Keefer, M. A. Jepson, C. A. Peery, T. C. Bjornn, and L. C. Stuehrenberg. 2008. Body temperature during migration in adult Chinook salmon and steelhead through the lower Columbia and Snake Rivers, 2000 and 2002. Technical Report 2008-3, Idaho Cooperative Fish and Wildlife Research Unit, Report for study APS-00-5, U.S. Army Corps of Engineers, Portland and Walla Walla Districts:Available at:
- 305 Claiborne, A. M., J. A. Miller, L. A. Weitkamp, D. J. Teel, and R. L. Emmett. 2014. Evidence for selective mortality in marine environments: the role of fish migration size, timing, and production type. *Marine Ecology Progress Series*
- 306 Claiborne, A. M., L. Campbell, B. Stevick, T. Sandell, J. P. Losee, M. Litz, and J. H. Anderson. 2021. Correspondence between scale growth, feeding conditions, and survival of adult Chinook salmon returning to Puget Sound and coastal Washington: Implications for forecasting. *Progress in Oceanography* 198.
- 307 Clark, T. D., E. Sandblom, and F. Jutfelt. 2013. Aerobic scope measurements of fishes in an era of climate change: Respirometry, relevance and recommendations. *Journal of Experimental Biology* 216:2771-2782.
- 308 Clark, T. D., E. Sandblom, S. G. Hinch, D. A. Patterson, P. B. Frappell, and A. P. Farrell. 2010. Simultaneous biologging of heart rate and acceleration, and their relationships with energy expenditure in free-swimming sockeye salmon (*Oncorhynchus nerka*). *Journal of Comparative Physiology B-Biochemical Systemic and*
- 309 Clark, T. D., K. M. Jeffries, S. G. Hinch, and A. P. Farrell. 2011. Exceptional aerobic scope and cardiovascular performance of pink salmon (*Oncorhynchus gorbuscha*) may underlie resilience in a warming climate. *Journal of*
- 310 Clark, T. D., M. R. Donaldson, S. Pieperhoff, S. M. Drenner, A. Lotto, S. J. Cooke, S. G. Hinch, D. A. Patterson, and A. P. Farrell. 2012. Physiological benefits of being small in a changing world: Responses of coho salmon (*Oncorhynchus kisutch*) to an acute thermal challenge and a simulated capture event. *Plos One* 7:e39079.
- 311 Clarke, A., and N. M. Johnston. 1999. Scaling of metabolic rate with body mass and temperature in teleost <sup>®</sup>sh. *Journal of Animal Ecology* 68:893±905.
- 312 Clews, E., I. Durance, I. P. Vaughan, and S. J. Ormerod. 2010. Juvenile salmonid populations in a temperate river system track synoptic trends in climate. *Global Change Biology* 16:3271-3283.
- 313 Cocherell, S. A., D. E. Cocherell, G. J. Jones, J. B. Miranda, L. C. Thompson, J. J. Cech, and A. P. Klimley. 2011. Rainbow trout *Oncorhynchus mykiss* energetic responses to pulsed flows in the American River, California, assessed by electromyogram telemetry. *Environmental Biology of Fishes* 90:29-41.
- 314 Cochran, S. M., S. Ricker, C. Anderson, S. P. Gallagher, and D. M. Ward. 2019. Comparing abundance-based and tag-based estimates of coho salmon marine survival. *Fisheries Management and Ecology* 26:165-171.
- 315 Cofalla, C., S. Hudjetz, S. Roger, M. Brinkmann, R. Frings, J. Wolz, B. Schmidt, A. Schaffer, U. Kammann, M. Hecker, H. Hollert, and H. Schuttrumpf. 2012. A combined hydraulic and toxicological approach to assess re-suspended sediments during simulated flood events-part II: An interdisciplinary experimental methodology. *Journal of Soils*
- 316 Cole, K. S., D. L. G. Noakes, N. Thompson, M. Blouin, B. Morrison, R. B. Couture, J. O'Neil, and C. B. Schreck. 2021. Effects of temperature on sexual development in steelhead, *Oncorhynchus mykiss*. *Environmental Biology of*
- 317 Coll-Llado, C., J. Giebichenstein, P. B. Webb, C. R. Bridges, and D. G. de la Serrana. 2018. Ocean acidification promotes otolith growth and calcite deposition in gilthead sea bream (*Sparus aurata*) larvae. *Scientific Reports*
- 318 Collins, E. E., J. S. Hargrove, T. A. Delomas, and S. R. Narum. 2020. Distribution of genetic variation underlying adult migration timing in steelhead of the Columbia River basin. *Ecology and Evolution* 10:9486-9502.
- 319 Colvin, S. A. R., S. M. P. Sullivan, P. D. Shirey, R. W. Colvin, K. O. Winemiller, R. M. Hughes, K. D. Fausch, D. M. Infante, J. D. Olden, K. R. Bestgen, R. J. Danehy, and L. Eby. 2019. Headwater Streams and Wetlands are Critical for
- 320 Comeau, S., G. Gorsky, R. Jeffree, J. L. Teyssie, and J. P. Gattuso. 2009. Impact of ocean acidification on a key Arctic pelagic mollusc (*Limacina helicina*). *Biogeosciences* 6:1877-1882.
- 321 Comeau, S., G. Gorsky, R. Jeffree, J. L. Teyssie, and J. P. Gattuso. 2009. Key Arctic pelagic mollusc (*Limacina helicina*) threatened by ocean acidification. *Biogeosciences Discuss* 6:2523-2537.
- 322 Comeau, S., G. Gorsky, S. Alliouane, and J. P. Gattuso. 2010. Larvae of the pteropod *Cavolinia inflexa* exposed to aragonite undersaturation are viable but shell-less. *Marine Biology* 157:2341-2345.
- 323 Comeau, S., J.-P. Gattuso, A.-M. Nisumaa, and J. Orr. 2012. Impact of aragonite saturation state changes on migratory pteropods. *Proceedings of the Royal Society B-Biological Sciences* 279:732-738.

- 324 Comeau, S., R. Jeffree, J. L. Teyssie, and J. P. Gattuso. 2010. Response of the arctic pteropod *Limacina helicina* to projected future environmental conditions. *Plos One* 5:e11362.
- 325 Comeau, S., S. Alliouane, and J. P. Gattuso. 2012. Effects of ocean acidification on overwintering juvenile Arctic pteropods *Limacina helicina*. *Marine Ecology Progress Series* 456:279-284.
- 326 Connor, W. P., C. E. Piston, and A. P. Garcia. 2003. Temperature during incubation as one factor affecting the distribution of Snake River Fall Chinook salmon spawning areas. *Transactions of the American Fisheries Society*
- 327 Connor, W. P., K. F. Tiffan, J. A. Chandler, D. W. Rondorf, B. D. Arnsberg, and K. C. Anderson. 2019. Upstream Migration and Spawning Success of Chinook Salmon in a Highly Developed, Seasonally Warm River System.
- 328 Connors, B. M., D. C. Braun, R. M. Peterman, A. B. Cooper, J. D. Reynolds, L. M. Dill, G. T. Ruggerone, and M. Krkosek. 2012. Migration links ocean-scale competition and local ocean conditions with exposure to farmed
- 329 Connors, B., M. J. Malick, G. T. Ruggerone, P. Rand, M. Adkison, J. R. Irvine, R. Campbell, and K. Gorman. 2020. Climate and competition influence sockeye salmon population dynamics across the Northeast Pacific Ocean.
- 330 Conover, D. O., T. A. Duffy, and L. A. Hice. 2009. The covariance between genetic and environmental influences across ecological gradients reassessing the evolutionary significance of countergradient and cogradients Variation.
- 331 Cook, C. J., G. Burness, and C. C. Wilson. 2018. Metabolic rates of embryos and alevin from a cold-adapted salmonid differ with temperature, population and family of origin: Implications for coping with climate change.
- 332 Cook, C. L., and D. J. Coughlin. 2010. Rainbow trout *Oncorhynchus mykiss* consume less energy when swimming near obstructions. *Journal of Fish Biology* 77:1716-1723.
- 333 Cook, K. V., A. J. Reid, D. A. Patterson, K. A. Robinson, J. M. Chapman, S. G. Hinch, and S. J. Cooke. 2019. A synthesis to understand responses to capture stressors among fish discarded from commercial fisheries and
- 334 Cooke, S. J., S. G. Hinch, M. R. Donaldson, T. D. Clark, E. J. Eliason, G. T. Crossin, G. D. Raby, K. M. Jeffries, M. Lapointe, K. Miller, D. A. Patterson, and A. P. Farrell. 2012. Conservation physiology in practice: How physiological knowledge has improved our ability to sustainably manage Pacific salmon during up-river migration. *Philosophical*
- 335 Copeland, T., and K. A. Meyer. 2011. Interspecies synchrony in salmonid densities associated with large-scale bioclimatic conditions in central Idaho. *Transactions of the American Fisheries Society* 140:928-942.
- 336 Copeland, T., B. J. Bowersox, M. W. Ackerman, and C. Camacho. 2019. Patterns of Iteroparity in Wild Snake River Steelhead. *Transactions of the American Fisheries Society* 148:926-937.
- 337 Copeland, T., D. Blythe, W. Schoby, E. Felts, and P. Murphy. 2020. Population effect of a large-scale stream restoration effort on Chinook salmon in the Pahsimeroi River, Idaho. *River Research and Applications* 37:100-110.
- 338 Cordoleani, F., C. C. Phillis, A. M. Sturrock, A. M. FitzGerald, A. Malkasian, G. E. Whitman, P. K. Weber, and R. C. Johnson. 2021. Threatened salmon rely on a rare life history strategy in a warming landscape. *Nature Climate*
- 339 Corey, E., T. Linnansaari, S. J. Dugdale, N. Bergeron, J. F. Gendron, M. Lapointe, and R. A. Cunjak. 2020. Comparing the behavioural thermoregulation response to heat stress by Atlantic salmon parr (*Salmo salar*) in two rivers.
- 340 Cornet, V., F. Geay, A. Erraud, S. N. M. Mandiki, E. Flamion, Y. Larondelle, X. Rollin, and P. Kestemont. 2021. Modulations of lipid metabolism and development of the Atlantic salmon (*Salmo salar*) fry in response to egg-to-
- 341 Côté, I., J. Dodson, I. Fleming, J. Hutchings, S. Jennings, N. Mantua, R. Peterman, B. Riddell, A. Weaver, and D. VanderZwaag. 2012. Sustaining Canada's Marine Biodiversity: Responding to the Challenges Posed by Climate Change, Fisheries, and Aquaculture. The Royal Society of Canada Expert Panel, Ottawa, ON.
- 342 Cote, J., J. M. Roussel, S. Cam, G. Bal, and G. Evanno. 2012. Population differences in response to hypoxic stress in Atlantic salmon. *Journal of Evolutionary Biology* 25:2596-2606.
- 343 Coughlin, D. J., L. T. Wilson, E. S. Kwon, and L. S. Travitz. 2020. Thermal acclimation of rainbow trout myotomal muscle, can trout acclimate to a warming environment? *Comparative Biochemistry and Physiology a-Molecular &*
- 344 Courtney, K. R., J. A. Falke, M. K. Cox, and J. Nichols. 2020. Energetic Status of Alaskan Chinook Salmon: Interpopulation Comparisons and Predictive Modeling Using Bioelectrical Impedance Analysis. *North American*
- 345 Courtney, M. B., M. Evans, K. R. Shedd, and A. C. Seitz. 2021. Understanding the behavior and ecology of Chinook salmon (*Oncorhynchus tshawytscha*) on an important feeding ground in the Gulf of Alaska. *Environmental Biology*
- 346 Cox, T. R., J. R. A. Butler, A. D. Webber, and J. C. Young. 2020. The ebb and flow of adaptive co-management: A longitudinal evaluation of a conservation conflict. *Environmental Science & Policy* 114:453-460.
- 347 Craig, B. E., C. A. Simenstad, and D. L. Bottom. 2014. Rearing in natural and recovering tidal wetlands enhances growth and life-history diversity of Columbia Estuary tributary coho salmon *Oncorhynchus kisutch* population.
- 348 Crichigno, S. A., and V. E. Cussac. 2019. Rainbow trout (*Oncorhynchus mykiss*) adaptation to a warmer climate: the performance of an improved strain under farm conditions. *Aquaculture International* 27:1869-1882.

349 Crichigno, S. A., L. A. Becker, M. Orellana, R. Larraza, G. Mirena, M. A. Battini, and V. E. Cussac. 2018. Rainbow trout adaptation to a warmer Patagonia and its potential to increase temperature tolerance in cultured stocks.

350 Crichigno, S. A., M. Orellana, R. Larraza, G. Mirena, and V. E. Cussac. 2021. Thermal effects in rainbow trout (*Oncorhynchus mykiss*) F1 embryos (farmed female x wild thermal-resistant male). *Journal of Fish Biology* 99:197-199.

351 Crosbie, T., D. W. Wright, F. Oppedal, S. Dalvin, M. S. Mykssvoll, and T. Dempster. 2020. Impact of thermoclines on the vertical distribution of salmon lice larvae. *Aquaculture Environment Interactions* 12:1-10.

352 Crossin, G. T., S. G. Hinch, S. J. Cooke, D. W. Welch, D. A. Patterson, S. R. M. Jones, A. G. Lotto, R. A. Leggatt, M. T. Mathes, J. M. Shrimpton, G. Van der Kraak, and A. P. Farrell. 2008. Exposure to high temperature influences the behaviour, physiology, and survival of sockeye salmon during spawning migration. *Canadian Journal of Zoology* 86:103-114.

353 Crozier, L. G., and J. A. Hutchings. 2014. Plastic and evolutionary responses to climate change in fish. *Evolutionary Ecology* 28:1-14.

354 Crozier, L. G., and R. W. Zabel. 2020. Middle Fork and South Fork Salmon River MPGs of the Snake River Spring/Summer-Run Chinook Salmon ESU. In R. W. Zabel and C. E. Jordan, editors. *Life Cycle Models of Interior Columbia River Basin Spring/Summer-Run Chinook Salmon Populations*, U.S. Department of Commerce, NOAA Technical Memorandum NMFS-FW-350, 1-10.

355 Crozier, L. G., B. J. Burke, B. E. Chasco, D. L. Widener, and R. W. Zabel. 2021. Climate change threatens Chinook salmon throughout their life cycle. *Communications Biology* 4:1-10.

356 Crozier, L. G., J. E. Siegel, L. E. Wiesebron, E. M. Trujillo, B. J. Burke, B. P. Sandford, and D. L. Widener. 2020. Snake River sockeye and Chinook salmon in a changing climate: Implications for upstream migration survival during spawning. *North American Journal of Fisheries Management* 40:1-10.

357 Crozier, L. G., L. E. Wiesebron, B. J. Burke, D. Widener, and T. Marsh. 2021. Reframing Steelhead Migration Behavior: A Population Perspective on Migration Rate and Survival Through the Columbia and Snake Rivers. *North American Journal of Fisheries Management* 41:1-10.

358 Crozier, L. G., M. D. Scheuerell, and R. W. Zabel. 2011. Using time series analysis to characterize evolutionary and plastic responses to environmental change: A case study of a shift toward earlier migration date in sockeye salmon. *Evolutionary Ecology* 25:1-14.

359 Crozier, L. G., M. M. McClure, T. Beechie, S. J. Bograd, D. A. Boughton, M. Carr, T. D. Cooney, J. B. Dunham, C. M. Greene, M. A. Haltuch, E. L. Hazen, D. M. Holzer, D. D. Huff, R. C. Johnson, C. E. Jordan, I. C. Kaplan, S. T. Lindley, N. J. Mantua, P. B. Moyle, J. M. Myers, M. W. Nelson, B. C. Spence, L. A. Weitkamp, T. H. Williams, and E. Willis-Norton. 2019. Climate vulnerability assessment for Pacific salmon and steelhead in the California Current Large Marine Ecosystem. *Marine Ecology Progress Series* 665:1-10.

360 Crozier, L. G., T. E. Bowerman, B. J. Burke, M. L. Keefer, and C. C. Caudill. 2017. High-stakes steepchase: a behavior-based model to predict individual travel times through diverse migration segments. *Ecosphere* 8:1-10.

361 Crozier, L., B. Burke, B. Sandford, G. Axel, and B. Sanderson. 2014. Passage and Survival of Adult Snake River Sockeye Salmon within and Upstream from the Federal Columbia River Power System. Fish Ecology Division, Northwest Fisheries Science Center National Marine Fisheries Service, Seattle, WA.

362 Crozier, L., R. W. Zabel, S. Achord, and E. E. Hockersmith. 2010. Interacting effects of density and temperature on body size in multiple populations of Chinook salmon. *Journal of Animal Ecology* 79:342-349.

363 Cummings, J. W., M. J. Hague, D. A. Patterson, and R. M. Peterman. 2011. The impact of different performance measures on model selection for Fraser River sockeye salmon. *North American Journal of Fisheries Management* 31:1-10.

364 Cunningham, C. J., P. A. H. Westley, and M. D. Adkison. 2018. Signals of large scale climate drivers, hatchery enhancement, and marine factors in Yukon River Chinook salmon survival revealed with a Bayesian life history model. *Marine Ecology Progress Series* 665:1-10.

365 Cury, P. M., J.-M. Fromentin, S. Figueira, and S. Bonhommeau. 2014. Resolving Hjort's Dilemma: How is recruitment related to spawning stock biomass in marine fish? *Oceanography* 27:42-47.

366 Czorlich, Y., T. Aykanat, J. Erkinaro, P. Orell, and C. R. Primmer. 2018. Rapid sex-specific evolution of age at maturity is shaped by genetic architecture in Atlantic salmon. *Nature Ecology & Evolution* 2:1800-1807.

367 D'Ambrosio, J., R. Morvezen, S. Brard-Fudulea, A. Bestin, A. A. Perez, D. Guemen, C. Poncet, P. Haffray, M. Dupont-Nivet, and F. Phocas. 2020. Genetic architecture and genomic selection of female reproduction traits in rainbow trout. *Genetics* 215:1-10.

368 Dadswell, M., A. Spares, J. Reader, M. McLean, T. McDermott, K. Samways, and J. Lilly. 2021. The Decline and Impending Collapse of the Atlantic Salmon (*Salmo salar*) Population in the North Atlantic Ocean: A Review of the Evidence. *ICES Journal of Marine Science* 78:1-10.

369 Dagit, R., M. T. Booth, M. Gomez, T. Hovey, S. Howard, S. D. Lewis, S. Jacobson, M. Larson, D. Mccanne, and T. H. Robinson. 2020. Occurrences of Steelhead Trout (*Oncorhynchus mykiss*) in southern California, 1994-2018. *North American Journal of Fisheries Management* 40:1-10.

370 Dale, K. E., E. A. Daly, and R. D. Brodeur. 2017. Interannual variability in the feeding and condition of subyearling Chinook salmon off Oregon and Washington in relation to fluctuating ocean conditions. *Fisheries Oceanography* 26:1-10.

371 Daley, J. M., T. A. Leadley, T. E. Pitcher, and K. G. Drouillard. 2012. Bioamplification and the selective depletion of persistent organic pollutants in Chinook salmon larvae. *Environmental Science & Technology* 46:2420-2426.

372 Dallaire, X., E. Normandeau, J. Mainguy, J. E. Tremblay, L. Bernatchez, and J. S. Moore. 2021. Genomic data support management of anadromous Arctic Char fisheries in Nunavik by highlighting neutral and putatively selected loci. *Marine Ecology Progress Series* 665:1-10.

373 Daly, E. A., and R. D. Brodeur. 2015. Warming Ocean Conditions Relate to Increased Trophic Requirements of  
Threatened and Endangered Salmon. *Plos One* 10.

374 Daly, E. A., J. A. Scheurer, R. D. Brodeur, L. A. Weitkamp, B. R. Beckman, and J. A. Miller. 2014. Juvenile steelhead  
distribution, migration, feeding, and growth in the Columbia River estuary, plume, and coastal waters. *Marine and*

375 Daly, E. A., R. D. Brodeur, and T. D. Auth. 2017. Anomalous ocean conditions in 2015: impacts on spring Chinook  
salmon and their prey field. *Marine Ecology Progress Series* 566:169-182.

376 Daly, E. A., T. D. Auth, R. D. Brodeur, and W. T. Peterson. 2013. Winter ichthyoplankton biomass as a predictor of  
early summer prey fields and survival of juvenile salmon in the northern California Current. *Marine Ecology*

377 Danovaro, R., C. Corinaldesi, A. Dell'Anno, J. A. Fuhrman, J. J. Middelburg, R. T. Noble, and C. A. Suttle. 2011.  
Marine viruses and global climate change. *Fems Microbiology Reviews* 35:993-1034.

378 Davidsen, J. G., L. Eikas, R. D. Hedger, E. B. Thorstad, L. Ronning, A. D. Sjursen, O. K. Berg, G. Bremset, S. Karlsson,  
and L. E. Sundt-Hansen. 2020. Migration and habitat use of the landlocked riverine Atlantic salmon *Salmo salar*

379 Davidson, R. S., B. H. Letcher, and K. H. Nislow. 2010. Drivers of growth variation in juvenile Atlantic salmon  
(*Salmo salar*): An elasticity analysis approach. *Journal of Animal Ecology* 79:1113-1121.

380 Davis, C. D., C. W. Epps, R. L. Flitcroft, and M. A. Banks. 2018. Refining and defining riverscape genetics: How rivers  
influence population genetic structure. *Wiley Interdisciplinary Reviews-Water* 5:e1269.

381 Davis, M. J., C. S. Ellings, I. Woo, S. Hodgson, K. Larsen, and G. Nakai. 2018. Gauging resource exploitation by  
juvenile Chinook salmon (*Oncorhynchus tshawytscha*) in restoring estuarine habitat. *Restoration Ecology* 26:976-

382 Davis, M. J., I. Woo, C. S. Ellings, S. Hodgson, D. A. Beauchamp, G. Nakai, and S. E. W. De La Cruz. 2019. Freshwater  
Tidal Forests and Estuarine Wetlands May Confer Early Life Growth Advantages for Delta-Reared Chinook Salmon.

383 Davis, M. J., I. Woo, C. S. Ellings, S. Hodgson, D. A. Beauchamp, G. Nakai, and S. E. W. De La Cruz. 2021. A Climate-  
Mediated Shift in the Estuarine Habitat Mosaic Limits Prey Availability and Reduces Nursery Quality for Juvenile

384 de Eyto, E., B. Doyle, N. King, T. Kilbane, R. Finlay, L. Sibigtroth, C. Graham, R. Poole, E. Ryder, M. Dillane, and E.  
Jennings. 2020. Characterisation of Salmonid Food Webs in the Rivers and Lakes of an Irish Peatland Ecosystem.  
*Biology and Environment-Proceedings of the Royal Irish Academy* 120:1-17.

385 de Eyto, E., P. McGinnity, J. Huisman, J. Coughlan, S. Consuegra, K. Farrell, C. O'Toole, J. Tufto, H. J. Megens, W.  
Jordan, T. Cross, and R. J. M. Stet. 2011. Varying disease-mediated selection at different life-history stages of

386 DeBano, S. J., D. E. Wooster, J. R. Walker, L. E. McMullen, and D. A. Horneck. 2016. Interactive influences of  
climate change and agriculture on aquatic habitat in a Pacific Northwestern watershed. *Ecosphere* 7:27.

387 Debertin, A. J., J. R. Irvine, C. A. Holt, G. Oka, and M. Trudel. 2017. Marine growth patterns of southern British  
Columbia chum salmon explained by interactions between density-dependent competition and changing climate.

388 Debes, P. V., M. F. Solberg, I. H. Matre, L. Dyrhovden, and K. A. Glover. 2021. Genetic variation for upper thermal  
tolerance diminishes within and between populations with increasing acclimation temperature in Atlantic salmon.

389 Debes, P. V., N. Pivchenko, J. Erkinaro, and C. R. Primmer. 2020. Genetic growth potential, rather than  
phenotypic size, predicts migration phenotype in Atlantic salmon. *Proceedings of the Royal Society B-Biological*

390 DeFilippo, L. B., D. E. Schindler, K. Shedd, and K. L. Schaberg. 2020. A Bayesian hierarchical approach to integrating  
historical and in-season genetic data for real-time assessment of a mixed stock fishery. *Canadian Journal of*

391 DeFilippo, L. B., T. W. Buehrens, M. Scheuerell, N. W. Kendall, and D. E. Schindler. 2021. Improving short-term  
recruitment forecasts for coho salmon using a spatiotemporal integrated population model. *Fisheries Research*

392 Deitch, M. J., M. Van Docto, M. Obedzinski, S. P. Nossaman, and A. Bartshire. 2018. Impact of multi-annual  
drought on streamflow and habitat in coastal California salmonid streams. *Hydrological Sciences Journal-Journal*

393 Del Rio, A. M., B. E. Davis, N. A. Fangue, and A. E. Todgham. 2019. Combined effects of warming and hypoxia on  
early life stage Chinook salmon physiology and development. *Conservation Physiology* 7:14.

394 Del Rio, A. M., G. N. Mukai, B. T. Martin, R. C. Johnson, N. A. Fangue, J. A. Israel, and A. E. Todgham. 2021.  
Differential sensitivity to warming and hypoxia during development and long-term effects of developmental

395 Dempson, B., C. J. Schwarz, I. R. Bradbury, M. J. Robertson, G. Veinott, R. Poole, and E. Colbourne. 2017. Influence  
of climate and abundance on migration timing of adult Atlantic salmon (*Salmo salar*) among rivers in

396 Deng, Z. D., J. J. Martinez, H. Li, R. A. Harnish, C. M. Woodley, J. A. Hughes, X. Li, T. Fu, J. Lu, G. A. McMichael, M. A.  
Weiland, M. B. Eppard, J. R. Skalski, and R. L. Townsend. 2017. Comparing the survival rate of juvenile Chinook  
salmon migrating through hydropower systems using injectable and surgical acoustic transmitters. *Sci Rep*

397 Desforges, J. E., K. Birnie-Gauvin, K. Aarestrup, and S. J. Cooke. 2021. Upper Thermal Tolerance Indicated by  
CTmax Fails to Predict Migration Strategy and Timing, Growth, and Predation Vulnerability in Juvenile Brown Trout



398 DeWeber, J. T., and J. T. Peterson. 2020. Comparing Environmental Flow Implementation Options with Structured  
Decision Making: Case Study from the Willamette River, Oregon. *Journal of the American Water Resources*

399 Dexter, E., S. M. Bollens, G. Rollwagen-Bollens, J. Emerson, and J. Zimmerman. 2015. Persistent vs. ephemeral  
invasions: 8.5 years of zooplankton community dynamics in the Columbia River. *Limnology and Oceanography*

400 Dietrich, J. P., A. L. Van Gaest, S. A. Strickland, and M. R. Arkoosh. 2014. The impact of temperature stress and  
pesticide exposure on mortality and disease susceptibility of endangered Pacific salmon. *Chemosphere* 108:353-

401 Ding, Y., E. F. Johnston, and T. E. Gillis. 2022. Mitogen-activated protein kinases contribute to temperature-  
induced cardiac remodelling in rainbow trout (*Oncorhynchus mykiss*). *Journal of Comparative Physiology B-*

402 Dionne, M., K. M. Miller, J. J. Dodson, F. Caron, and L. Bernatchez. 2007. Clinal variation in mhc diversity with  
temperature: Evidence for the role of host-pathogen interaction on local adaptation in Atlantic salmon. *Evolution*

403 Dittmer, K. 2013. Changing streamflow on Columbia Basin tribal lands-climate change and salmon. *Climatic*

404 Dixon, H. J., M. Power, J. B. Dempson, T. F. Sheehan, and G. Chaput. 2012. Characterizing the trophic position and  
shift in Atlantic salmon (*Salmo salar*) from freshwater to marine life-cycle phases using stable isotopes. *Ices*

405 Dixson, D. L., P. L. Munday, and G. P. Jones. 2010. Ocean acidification disrupts the innate ability of fish to detect  
predator olfactory cues. *Ecology Letters* 13:68-75.

406 Doctor, K., B. Berejikian, J. J. Hard, and D. VanDoornik. 2014. Growth-mediated life history traits of steelhead  
reveal phenotypic divergence and plastic response to temperature. *Transactions of the American Fisheries Society*

407 Doll, J. C., C. J. Wood, D. W. Goodfred, and J. M. Rash. 2021. Incorporating Batch Mark-Recapture Data into an  
Integrated Population Model of Brown Trout. *North American Journal of Fisheries Management* 41:1390-1407.

408 Donadi, S., L. Sandin, C. Tamario, and E. Degerman. 2019. Country-wide analysis of large wood as a driver of fish  
abundance in Swedish streams: Which species benefit and where? *Aquatic Conservation-Marine and Freshwater*

409 Donaldson, M. R., S. G. Hinch, D. A. Patterson, A. P. Farrell, J. M. Shrimpton, K. M. Miller-Saunders, D. Robichaud,  
J. Hills, K. A. Hruska, K. C. Hanson, K. K. English, G. Van der Kraak, and S. J. Cooke. 2010. Physiological condition  
differentially affects the behavior and survival of two populations of sockeye salmon during their freshwater

410 Doney, S. C., D. S. Busch, S. R. Cooley, and K. J. Kroeker. 2020. The Impacts of Ocean Acidification on Marine  
Ecosystems and Reliant Human Communities. *Annual Review of Environment and Resources* 45:83-112.

411 Doney, S. C., L. Bopp, and M. C. Long. 2014. Historical and future trends in ocean climate and biogeochemistry.

412 Doney, S. C., M. Ruckelshaus, J. E. Duffy, J. P. Barry, F. Chan, C. A. English, H. M. Galindo, J. M. Grebmeier, A. B.  
Hollowed, N. Knowlton, J. Polovina, N. N. Rabalais, W. J. Sydeman, and L. D. Talley. 2012. Climate Change Impacts  
on Marine Ecosystems. Pages 11-37 in C. A. Carlson and S. J. Giovannoni, editors. *Annual Review of Marine*

413 Donley, E. E., R. J. Naiman, and M. D. Marineau. 2012. Strategic planning for instream flow restoration: A case  
study of potential climate change impacts in the central Columbia River basin. *Global Change Biology* 18:3071-

414 Donnelly, D. S., V. R. von Biela, S. D. McCormick, S. M. Laske, M. P. Carey, S. Waters, L. Bowen, R. J. Brown, S.  
Larson, and C. E. Zimmerman. 2020. A manipulative thermal challenge protocol for adult salmonids in remote field

415 Dorner, B., K. R. Holt, R. M. Peterman, C. Jordan, D. P. Larsen, A. R. Olsen, and O. I. Abdul-Aziz. 2013. Evaluating  
alternative methods for monitoring and estimating responses of salmon productivity in the North Pacific to future  
climatic change and other processes: A simulation study. *Fisheries Research* 147:10-23.

416 Dorner, B., M. J. Catalano, and R. M. Peterman. 2018. Spatial and temporal patterns of covariation in productivity  
of Chinook salmon populations of the northeastern Pacific Ocean. *Canadian Journal of Fisheries and Aquatic*

417 Doubleday, A. J., and R. R. Hopcroft. 2015. Interannual patterns during spring and late summer of larvaceans and  
pteropods in the coastal Gulf of Alaska, and their relationship to pink salmon survival. *Journal of Plankton*

418 Doubleday, A., N. A. Errett, K. L. Ebi, and J. J. Hess. 2020. Indicators to Guide and Monitor Climate Change  
Adaptation in the US Pacific Northwest. *American Journal of Public Health* 110:180-188.

419 Drenkard, E. J., C. Stock, A. C. Ross, K. W. Dixon, A. Adcroft, M. Alexander, V. Balaji, S. J. Bograd, M. Butenschon,  
W. Cheng, E. Curchitser, E. Di Lorenzo, R. Dussin, A. C. Haynie, M. Harrison, A. Hermann, A. Hollowed, K. Holsman,  
J. Holt, M. G. Jacox, C. J. Jang, K. A. Kearney, B. A. Muhling, M. P. Buil, V. Saba, A. B. Sando, D. Tommasi, and M. Y.  
Wang. 2021. Next-generation regional ocean projections for living marine resource management in a changing

420 Drenner, S. M., S. G. Hinch, E. G. Martins, D. Robichaud, L. A. Thompson, D. A. Patterson, S. J. Cooke, and R. E.  
Thomson. 2014. Variable thermal experience and diel thermal patterns of homing sockeye salmon in coastal

421 Drinan, D. P., A. V. Zale, M. A. H. Webb, B. B. Shepard, and S. T. Kalinowski. 2012. Evidence of local adaptation in  
Westslope cutthroat trout. *Transactions of the American Fisheries Society* 141:872-880.

422 Drinan, T. J., P. McGinnity, J. P. Coughlan, T. F. Cross, and S. S. Harrison. 2012. Morphological variability of Atlantic  
salmon *Salmo salar* and brown trout *Salmo trutta* in different river environments. *Ecology of Freshwater Fish*

423 Du, X. N., W. Peterson, and L. O'Higgins. 2015. Interannual variations in phytoplankton community structure in the  
 northern California Current during the upwelling seasons of 2001-2010. *Marine Ecology Progress Series* 519:75-  
 424 Dudley, P. N. 2019. Insights from an individual based model of a fish population on a large regulated river.  
*Environmental Biology of Fishes* 102:1069-1095.

425 Duffin, J., R. A. Carmichael, E. M. Yager, R. Benjankar, and D. Tonina. 2021. Detecting multi-scale riverine  
 topographic variability and its influence on Chinook salmon habitat selection. *Earth Surface Processes and*  
 426 Duffy, E. J., D. A. Beauchamp, R. M. Sweeting, R. J. Beamish, and J. S. Brennan. 2010. Ontogenetic diet shifts of  
 juvenile Chinook salmon in nearshore and offshore habitats of Puget Sound. *Transactions of the American*  
 427 Duguid, W. D. P., T. W. Iwanicki, J. Qualley, and F. Juanes. 2021. Fine-scale spatiotemporal variation in juvenile  
 Chinook Salmon distribution, diet and growth in an oceanographically heterogeneous region. *Progress in*  
 428 Dunham, J. B., A. E. Rosenberger, C. H. Luce, and B. E. Rieman. 2007. Influences of wildfire and channel  
 reorganization on spatial and temporal variation in stream temperature and the distribution of fish and  
 429 Dunkle, M. R., R. A. Dunbeck, and C. C. Caudill. 2021. Fish carcasses alter subyearling Chinook salmon dispersal  
 behavior and density but not growth in experimental mesocosms. *Ecosphere* 12.

430 Dunlop, K., A. P. Eloranta, E. Schoen, M. Wipfli, J. L. A. Jensen, R. Muladal, and G. N. Christensen. 2021. Evidence  
 of energy and nutrient transfer from invasive pink salmon (*Oncorhynchus gorbuscha*) spawners to juvenile  
 Atlantic salmon (*Salmo salar*) and brown trout (*Salmo trutta*) in northern Norway. *Ecology of Freshwater Fish*  
 431 Durhack, T. C., N. J. Mochnacz, C. J. Macnaughton, E. C. Enders, and J. R. Treberg. 2021. Life through a wider  
 scope: Brook Trout (*Salvelinus fontinalis*) exhibit similar aerobic scope across a broad temperature range. *Journal*  
 432 Ebersole, J. L., R. M. Quinones, S. Clements, and B. H. Letcher. 2020. Managing climate refugia for freshwater  
 fishes under an expanding human footprint. *Front Ecol Environ* 18:271-280.

433 Egilsdottir, H., J. I. Spicer, and S. D. Rundle. 2009. The effect of CO<sub>2</sub> acidified sea water and reduced salinity on  
 aspects of the embryonic development of the amphipod *Echinogammarus marinus* (Leach). *Marine Pollution*  
 434 Eiler, J. H., T. M. Grothues, J. A. Dobarro, and R. Shome. 2019. Tracking the Movements of Juvenile Chinook  
 Salmon using an Autonomous Underwater Vehicle under Payload Control. *Applied Sciences-Basel* 9:20.

435 Eliason, E. J., and A. P. Farrell. 2016. Oxygen uptake in Pacific salmon *Oncorhynchus* spp.: when ecology and  
 physiology meet. *Journal of Fish Biology* 88:359-388.

436 Eliason, E. J., M. Dick, D. A. Patterson, K. A. Robinson, J. Lotto, S. G. Hinch, and S. J. Cooke. 2020. Sex-specific  
 differences in physiological recovery and short-term behaviour following fisheries capture in adult sockeye salmon  
 (*Oncorhynchus nerka*). *Canadian Journal of Fisheries and Aquatic Sciences* 77:1749-1757.

437 Eliason, E. J., M. K. Gale, C. K. Whitney, A. Lotto, and S. G. Hinch. 2017. Intraspecific differences in endurance swim  
 performance and cardiac size in sockeye salmon (*Oncorhynchus nerka*) parr tested at three temperatures.

438 Eliason, E. J., S. M. Wilson, A. P. Farrell, S. J. Cooke, and S. G. Hinch. 2013. Low cardiac and aerobic scope in a  
 coastal population of sockeye salmon *Oncorhynchus nerka* with a short upriver migration. *Journal of Fish Biology*  
 439 Eliason, E. J., T. D. Clark, M. J. Hague, L. M. Hanson, Z. S. Gallagher, K. M. Jeffries, M. K. Gale, D. A. Patterson, S. G.  
 Hinch, and A. P. Farrell. 2011. Differences in thermal tolerance among sockeye salmon populations. *Science*  
 440 Eliason, E. J., T. D. Clark, S. G. Hinch, and A. P. Farrell. 2013. Cardiorespiratory collapse at high temperature in  
 swimming adult sockeye salmon. *Conserv Physiol* 1:cot008.

441 Elliott, J. E., J. Levac, M. F. Guigueno, D. P. Shaw, M. Wayland, C. A. Morrissey, D. C. G. Muir, and K. H. Elliott. 2012.  
 Factors influencing legacy pollutant accumulation in alpine osprey: biology, topography, or melting glaciers?

442 Elliott, J. M., and J. A. Elliott. 2010. Temperature requirements of Atlantic salmon *Salmo salar*, brown trout *Salmo*  
*trutta* and Arctic charr *Salvelinus alpinus*: Predicting the effects of climate change. *Journal of Fish Biology* 77:1793-  
 443 Ellis, L. E., C. F. D. Sacobie, J. D. Kieffer, and T. J. Benfey. 2013. The effects of dissolved oxygen and triploidy on  
 critical thermal maximum in brook charr (*Salvelinus fontinalis*). *Comparative Biochemistry and Physiology a-*  
 444 Emerson, J. E., S. M. Bollens, and T. D. Counihan. 2015. Seasonal dynamics of zooplankton in Columbia-Snake River  
 reservoirs, with special emphasis on the invasive copepod *Pseudodiaptomus forbesi*. *Aquatic Invasions* 10:25-40.

445 Emmett, R. L., and D. B. Sampson. 2007. The relationships between predatory fish, forage fishes, and juvenile  
 salmonid marine survival off the Columbia River: A simple trophic model analysis. *California Cooperative Oceanic*  
 446 Emmett, R. L., G. K. Krutzikowsky, and P. Bentley. 2006. Abundance and distribution of pelagic piscivorous fishes in  
 the Columbia River plume during spring / early summer 1998-2003: Relationship to oceanographic conditions,  
 forage fishes, and juvenile salmonids. *Progress in Oceanography* 68:1-26.

447 Enefalk, A., A. Huusko, P. Louhi, and E. Bergman. 2019. Fine stream wood decreases growth of juvenile brown  
 trout (*Salmo trutta* L.). *Environmental Biology of Fishes* 102:759-770.

448 Erkinaro, J., Y. Czorlich, P. Orell, J. Kuusela, M. Falkegard, M. Lansman, H. Pulkkinen, C. R. Primmer, and E. Niemela. 2019. Life history variation across four decades in a diverse population complex of Atlantic salmon in a large subarctic river. *Canadian Journal of Fisheries and Aquatic Sciences* 76:42-55.

449 Erraud, A., M. Bonnard, V. Cornet, I. Ben Ammar, S. Antipine, Q. Peignot, J. Lambert, S. N. M. Mandiki, and P. Kestemont. 2021. How age, captivity and cryopreservation affect sperm quality and reproductive efficiency in

450 Escobar-Arias, M. I., and G. B. Pasternack. 2010. A hydrogeomorphic dynamics approach to assess in-stream ecological functionality using the function flows model Part 1--Model characteristics. *River Research and*

451 Esenkulova, S., K. D. Suchy, R. Pawlowicz, M. Costa, and I. A. Pearsall. 2021. Harmful Algae and Oceanographic Conditions in the Strait of Georgia, Canada Based on Citizen Science Monitoring. *Frontiers in Marine Science* 8.

452 Espinasse, B., B. P. V. Hunt, B. P. Finney, J. K. Fryer, A. V. Bugaev, and E. A. Pakhomov. 2020. Using stable isotopes to infer stock-specific high-seas distribution of maturing sockeye salmon in the North Pacific. *Ecology and*

453 Espinasse, B., B. P. V. Hunt, Y. D. Coll, and E. A. Pakhomov. 2019. Investigating high seas foraging conditions for salmon in the North Pacific: insights from a 100-year scale archive for Rivers Inlet sockeye salmon. *Canadian*

454 Ettinger, A. K., E. R. Buhle, B. E. Feist, E. Howe, J. A. Spromberg, N. L. Scholz, and P. S. Levin. 2021. Prioritizing conservation actions in urbanizing landscapes. *Scientific Reports* 11.

455 Evans, M. L., A. E. Kohler, R. G. Griswold, K. A. Tardy, K. R. Eaton, and J. D. Ebel. 2020. Salmon-mediated nutrient flux in Snake River sockeye salmon nursery lakes: the influence of depressed population size and hatchery

456 Evans, M. L., B. D. Neff, and D. D. Heath. 2010. Quantitative genetic and translocation experiments reveal genotype-by-environment effects on juvenile life-history traits in two populations of Chinook salmon

457 Evans, T. G., E. Hammill, K. Kaukinen, A. D. Schulze, D. A. Patterson, K. K. English, J. M. R. Curtis, and K. M. Miller. 2011. Transcriptomics of environmental acclimatization and survival in wild adult Pacific sockeye salmon (*Oncorhynchus nerka*) during spawning migration. *Molecular Ecology* 20:4472-4489.

458 Everett, M. V., and J. E. Seeb. 2014. Detection and mapping of QTL for temperature tolerance and body size in Chinook salmon (*Oncorhynchus tshawytscha*) using genotyping by sequencing. *Evolutionary Applications* 7:480-

459 Faber, M., S. Shaw, S. Yoon, E. D. Alves, B. Wang, Z. T. Qi, B. Okamura, H. Hartikainen, C. J. Secombes, and J. W. Holland. 2021. Comparative transcriptomics and host-specific parasite gene expression profiles inform on drivers

460 Fabris, L., I. A. Malcolm, W. B. Buddendorf, and C. Soulsby. 2018. Integrating process-based flow and temperature models to assess riparian forests and temperature amelioration in salmon streams. *Hydrological Processes* 32:776-

461 Fabris, L., W. B. Buddendorf, and C. Soulsby. 2019. Assessing the seasonal effect of flow regimes on availability of Atlantic salmon fry habitat in an upland Scottish stream. *Science of the Total Environment* 696:14.

462 Fairfax, E., and A. Whittle. 2020. Smokey the Beaver: beaver-dammed riparian corridors stay green during wildfire throughout the western United States. *Ecological Applications* 30:e02225.

463 Falke, J. A., R. L. Flitcroft, J. B. Dunham, K. M. McNyset, P. F. Hessburg, and G. H. Reeves. 2015. Climate change and vulnerability of bull trout (*Salvelinus confluentus*) in a fire-prone landscape. *Canadian Journal of Fisheries and*

464 Fanguie, N. A., D. E. Cocherell, F. Mauduit, J. B. Poletto, K. Carr, T. A. O'Rear, G. Soyster, S. Lorenzato, J. Carlon, M. L. Kavvas, and J. J. Cech. 2021. Juvenile Chinook salmon use of sandbar willows in a large-scale, simulated riparian floodplain: microhabitat and energetics. *Environmental Biology of Fishes* 104:867-879.

465 Farley, E. V., A. Starovoytov, S. Naydenko, R. Heintz, M. Trudel, C. Guthrie, L. Eisner, and J. R. Guyon. 2011. Implications of a warming eastern Bering Sea for Bristol Bay sockeye salmon. *Ices Journal of Marine Science*

466 Farr, E. R., M. R. Johnson, M. W. Nelson, J. A. Hare, W. E. Morrison, M. D. Lettrich, B. Vogt, C. Meaney, U. A. Howson, P. J. Auster, F. A. Borsuk, D. C. Brady, M. J. Cashman, P. Colarusso, J. H. Grabowski, J. P. Hawkes, R. Mercaldo-Allen, D. B. Packer, and D. K. Stevenson. 2021. An assessment of marine, estuarine, and riverine habitat

467 Farrell, A. P. 2009. Environment, antecedents and climate change: Lessons from the study of temperature physiology and river migration of salmonids. *Journal of Experimental Biology* 212:3771-3780.

468 Farrell, A. P. 2013. Aerobic scope and its optimum temperature: Clarifying their usefulness and limitations - correspondence on J. Exp. Biol. 216, 2771-2782. *Journal of Experimental Biology* 216:4493-4494.

469 Farrell, A. P., S. G. Hinch, S. J. Cooke, D. A. Patterson, G. T. Crossin, M. Lapointe, and M. T. Mathes. 2008. Pacific salmon in hot water: Applying aerobic scope models and biotelemetry to predict the success of spawning

470 Fatima, S., M. Adams, and R. Wilkinson. 2020. Effects of advanced and continuous photoperiod regimes on maturation control and profiles of sex steroids in brook trout (*Salvelinus fontinalis*). *Australian Journal of Zoology*

471 Fausch, K. D. 2014. A historical perspective on drift foraging models for stream salmonids. *Environmental Biology*

472 Favrot, S. D., and B. C. Jonasson. 2020. Fall and Winter Movement Dynamics of Naturally Produced Spring Chinook Salmon Parr in Two Neighboring Interior Pacific Northwest Natal Rivers. *Transactions of the American Fisheries*

473 Favrot, S. D., B. C. Jonasson, and J. T. Peterson. 2018. Fall and Winter Microhabitat Use and Suitability for Spring Chinook Salmon Parr in a US Pacific Northwest River. *Transactions of the American Fisheries Society* 147:151-170.

474 Feddern, M. L., G. W. Holtgrieve, and E. J. Ward. 2021. Stable isotope signatures in historic harbor seal bone link food web-assimilated carbon and nitrogen resources to a century of environmental change. *Global Change*

475 Feddern, M., H. R. Bassett, K. N. McElroy, M. Ree, M. Gho, and R. Hilborn. 2019. A novel method for modeling age and length selectivity of sockeye salmon as applied to the Bristol Bay Port Moller test fishery. *Canadian Journal of*

476 Feeken, S. F., B. J. Bowersox, M. E. Dobos, M. P. Corsi, M. C. Quist, and T. Copeland. 2019. Distribution and Movement of Steelhead and Anglers in the Clearwater River, Idaho. *North American Journal of Fisheries*

477 Feist, B. E., E. R. Buhle, D. H. Baldwin, J. A. Spromberg, S. E. Damm, J. W. Davis, and N. L. Scholz. 2017. Roads to ruin: conservation threats to a sentinel species across an urban gradient. *Ecol Appl* 27:2382-2396.

478 Feldhaus, J. W., S. A. Heppell, H. Li, and M. G. Mesa. 2010. A physiological approach to quantifying thermal habitat quality for redband rainbow trout (*Oncorhynchus mykiss gairdneri*) in the South Fork John Day River, Oregon.

479 Fellman, J. B., E. Hood, S. Nagorski, J. Hudson, and S. Pyare. 2019. Interactive physical and biotic factors control dissolved oxygen in salmon spawning streams in coastal Alaska. *Aquatic Sciences* 81:11.

480 Fenkes, M., H. A. Shiels, and R. L. Nudds. 2018. Body shape and robustness response to water flow during development of brown trout *Salmo trutta* parr. *Journal of Fish Biology* 93:360-369.

481 Fenkes, M., J. L. Fitzpatrick, H. A. Shiels, and R. L. Nudds. 2019. Acclimation temperature changes spermatozoa flagella length relative to head size in brown trout. *Biology Open* 8:7.

482 Fennie, H. W., S. Sponaugle, E. A. Daly, and R. D. Brodeur. 2020. Prey tell: what quillback rockfish early life history traits reveal about their survival in encounters with juvenile coho salmon. *Marine Ecology Progress Series* 650:7-

483 Fergusson, E. A., M. V. Sturdevant, and J. A. Orsi. 2010. Effects of starvation on energy density of juvenile chum salmon (*Oncorhynchus keta*) captured in marine waters of Southeastern Alaska. *Fishery Bulletin* 108:218-225.

484 Fergusson, E., T. Miller, M. V. McPhee, C. Fugate, and H. Schultz. 2020. Trophic responses of juvenile Pacific salmon to warm and cool periods within inside marine waters of Southeast Alaska. *Progress in Oceanography* 186.

485 Fernandes, T., and B. C. McMeans. 2019. Coping with the cold: energy storage strategies for surviving winter in freshwater fish. *Ecography* 42:2037-2052.

486 Fiechter, J., C. A. Edwards, and A. M. Moore. 2018. Wind, circulation, and topographic effects on alongshore phytoplankton variability in the California Current. *Geophysical Research Letters* 45:3238-3245.

487 Fiechter, J., J. A. Santora, F. Chavez, D. Northcott, and M. Messie. 2020. Krill Hotspot Formation and Phenology in the California Current Ecosystem. *Geophysical Research Letters* 47.

488 Fiechter, J., L. A. Huckstadt, K. A. Rose, and D. P. Costa. 2016. A fully coupled ecosystem model to predict the foraging ecology of apex predators in the California Current. *Marine Ecology Progress Series* 556:273-285.

489 Fiechter, J., M. P. Buil, M. G. Jacox, M. A. Alexander, and K. A. Rose. 2021. Projected Shifts in 21st Century Sardine Distribution and Catch in the California Current. *Frontiers in Marine Science* 8.

490 Field, J. C., R. R. Miller, J. A. Santora, N. Tolimieri, M. A. Haltuch, R. D. Brodeur, T. D. Auth, E. J. Dick, M. H. Monk, K. M. Sakuma, and B. K. Wells. 2021. Spatiotemporal patterns of variability in the abundance and distribution of winter-spawned pelagic juvenile rockfish in the California Current. *Plos One* 16:e0251638.

491 Figueira, W. F., and D. J. Booth. 2010. Increasing ocean temperatures allow tropical fishes to survive overwinter in temperate waters. *Global Change Biology* 16:506-516.

492 Filipe, A. F., D. Markovic, F. Pletterbauer, C. Tisseuil, A. De Wever, S. Schmutz, N. Bonada, and O. Freyhof. 2013. Forecasting fish distribution along stream networks: Brown trout (*Salmo trutta*) in Europe. *Diversity and*

493 Finlay, R., R. Poole, J. Coughlan, K. P. Phillips, P. Prodohl, D. Cotter, P. McGinnity, and T. E. Reed. 2020. Telemetry and genetics reveal asymmetric dispersal of a lake-feeding salmonid between inflow and outflow spawning streams at a microgeographic scale. *Ecology and Evolution* 10:1762-1783.

494 Finney, B. P., J. Alheit, K. C. Emeis, D. B. Field, D. Gutierrez, and U. Struck. 2010. Paleoecological studies on variability in marine fish populations: A long-term perspective on the impacts of climatic change on marine

495 Finstad, A. G., and B. Jonsson. 2012. Effect of incubation temperature on growth performance in Atlantic salmon. *Marine Ecology-Progress Series* 454:75-82.

496 Finstad, A. G., and C. L. Hein. 2012. Migrate or stay: Terrestrial primary productivity and climate drive anadromy in Arctic char. *Global Change Biology* 18:2487-2497.

497 Finstad, A. G., O. K. Berg, T. Forseth, O. Ugedal, and T. F. Naesje. 2010. Adaptive winter survival strategies: Defended energy levels in juvenile Atlantic salmon along a latitudinal gradient. *Proceedings of the Royal Society B-*

- 498 Fire, S. E., A. Bogomolni, R. A. DiGiovanni, G. Early, T. A. Leighfield, K. Matassa, G. A. Miller, K. M. T. Moore, M. Moore, M. Niemeyer, K. Pugliares, Z. H. Wang, and F. W. Wenzel. 2021. An assessment of temporal, spatial and taxonomic trends in harmful algal toxin exposure in stranded marine mammals from the US New England coast.
- 499 Fisher, J. P., L. A. Weitkamp, D. J. Teel, S. A. Hinton, J. A. Orsi, E. V. Farley, J. F. T. Morris, M. E. Thiess, R. M. Sweeting, and M. Trudel. 2014. Early ocean dispersal patterns of Columbia River Chinook and coho salmon.
- 500 Fisher, J. P., M. Trudel, A. Amman, J. A. Orsi, J. Piccolo, C. Bucher, E. Casillas, J. A. Harding, B. MacFarlane, R. Brodeur, J. Morris, and D. Welch. 2007. Comparisons of the coastal distribution and abundances of juvenile Pacific salmon from central California to the northern Gulf of Alaska. Pages 31-80 in R. D. B. C. B. Churchill, L. J. Haldorson, and S. M. McKinnell, editor. The ecology of juvenile salmon in the northeast Pacific Ocean: regional
- 501 FitzGerald, A. M., S. N. John, T. M. Apgar, N. J. Mantua, and B. T. Martin. 2021. Quantifying thermal exposure for migratory riverine species: Phenology of Chinook salmon populations predicts thermal stress. *Global Change*
- 502 Fitzgerald, K. A., M. R. Haworth, K. R. Bestgen, C. J. Farrell, S. Utsumi, O. Kishida, H. Uno, and Y. Kanno. 2021. Hatch timing of two subarctic salmonids in a stream network estimated by otolith increments. *Fisheries*
- 503 Fivelstad, S., H. Haavik, G. Lovik, and A. B. Olsen. 1998. Sublethal effects and safe levels of carbon dioxide in seawater for Atlantic salmon postsmolts (*Salmo salar* L.): Ion regulation and growth. *Aquaculture* 160:305-316.
- 504 Fivelstad, S., K. Kvamme, S. Handeland, M. Fivelstad, A. B. Olsen, and C. D. Hosfeld. 2015. Growth and physiological models for Atlantic salmon (*Salmo salar* L.) parr exposed to elevated carbon dioxide concentrations
- 505 Fjellidal, P. G., T. Hansen, and T. S. Huang. 2011. Continuous light and elevated temperature can trigger maturation both during and immediately after smoltification in male Atlantic salmon (*Salmo salar*). *Aquaculture* 321:93-100.
- 506 Flavio, H., P. Caballero, N. Jepsen, and K. Aarestrup. 2021. Atlantic salmon living on the edge: Smolt behaviour and survival during seaward migration in River Minho. *Ecology of Freshwater Fish* 30:61-72.
- 507 Flitcroft, R. L., I. Arismendi, and M. V. Santelmann. 2019. A Review of Habitat Connectivity Research for Pacific Salmon in Marine, Estuary, and Freshwater Environments. *Journal of the American Water Resources Association*
- 508 Flitcroft, R., K. Burnett, and K. Christiansen. 2013. A simple model that identifies potential effects of sea-level rise on estuarine and estuary-ecotone habitat locations for salmonids in Oregon, USA. *Environmental Management*
- 509 Flitcroft, R., S. Lewis, I. Arismendi, C. Davis, G. Giannico, B. Penaluna, M. Santelmann, M. Safeeq, and J. Snyder. 2019. Using expressed behaviour of coho salmon (*Oncorhynchus kisutch*) to evaluate the vulnerability of upriver migrants under future hydrological regimes: Management implications and conservation planning. *Aquatic*
- 510 Flores, A. M., M. M. Davies, K. Kushneryk, P. T. E. S. Lawn, S. Helms, H. M. Thomson, K. R. Nelson, C. W. Burns, S. Roias, and T. G. Gerwing. 2021. Declines of juvenile coastal cutthroat trout and coho salmon over fifteen years in a salmon-bearing stream in the Salish Sea. *Western North American Naturalist* 81:550-557.
- 511 Flynn, K. J., J. C. Blackford, M. E. Baird, J. A. Raven, D. R. Clark, J. Beardall, C. Brownlee, H. Fabian, and G. L. Wheeler. 2012. Changes in pH at the exterior surface of plankton with ocean acidification. *Nature Climate Change*
- 512 Fokkema, W., H. P. van der Jeugd, T. K. Lameris, A. M. Dokter, B. S. Ebbinge, A. M. de Roos, B. A. Nolet, T. Piersma, and H. Olff. 2020. Ontogenetic niche shifts as a driver of seasonal migration. *Oecologia* 193:285-297.
- 513 Folio, D. M., J. Gil, A. Caudron, and J. Labonne. 2021. Genotype-by-environment interactions drive the maintenance of genetic variation in a *Salmo trutta* L. hybrid zone. *Evolutionary Applications* 14:2698-2711.
- 514 Folkedal, O., L. H. Stien, T. Torgersen, E. Oppedal, R. E. Olsen, J. E. Fosseidengen, V. A. Braithwaite, and T. S. Kristiansen. 2012. Food anticipatory behaviour as an indicator of stress response and recovery in Atlantic salmon post-smolt after exposure to acute temperature fluctuation. *Physiology & Behavior* 105:350-356.
- 515 Folkedal, O., T. Torgersen, R. E. Olsen, A. Ferno, J. Nilsson, F. Oppedal, L. H. Stien, and T. S. Kristiansen. 2012. Duration of effects of acute environmental changes on food anticipatory behaviour, feed intake, oxygen consumption, and cortisol release in Atlantic salmon parr. *Physiology & Behavior* 105:283-291.
- 516 Fonner, R., J. Honea, J. C. Jorgensen, M. Plummer, and M. McClure. 2021. Considering intervention intensity in habitat restoration planning: An application to Pacific salmon. *J Environ Manage* 299:113536.
- 517 Forbes, V. E., S. Railsback, C. Accolla, B. Birnir, R. J. F. Bruins, V. Ducrot, N. Galic, K. Garber, B. C. Harvey, H. I. Jager, A. Kanarek, R. Pastorok, R. Rebarber, P. Thorbek, and C. J. Salice. 2019. Predicting impacts of chemicals from organisms to ecosystem service delivery: A case study of endocrine disruptor effects on trout. *Science of the Total*
- 518 Ford, J. K. B., and G. M. Ellis. 2006. Selective foraging by fish-eating killer whales *Orcinus orca* in British Columbia. *Marine Ecology-Progress Series* 316:185-199.

- 519 Ford, M. D., K. M. Nichols, R. S. Waples, E. C. Anderson, M. Kardos, I. Koch, G. McKinney, M. R. Miller, J. Myers, K. Naish, S. R. Narum, K. G. O'Malley, D. Pearse, T. R. Seamons, A. Spidle, P. Swanson, T. Q. Thompson, K. I. Warheit, and S. Willis. 2020. Reviewing and Synthesizing the State of the Science Regarding Associations between Adult Run Timing and Specific Genotypes in Chinook Salmon and Steelhead: Report of a workshop held in Seattle,
- 520 Ford, M. J., editor. 2022. Biological Viability Assessment Update for Pacific Salmon and Steelhead Listed Under the Endangered Species Act: Pacific Northwest. U.S. Department of Commerce, NOAA Technical Memorandum NMFS-
- 521 Forgan, L. G., and M. E. Forster. 2010. Oxygen-dependence of metabolic rate in the muscles of craniates. *Journal of Comparative Physiology B-Biochemical Systemic and Environmental Physiology* 180:715-729.
- 522 Foyle, K. L., S. Hess, M. D. Powell, and N. A. Herbert. 2020. What Is Gill Health and What Is Its Role in Marine Finfish Aquaculture in the Face of a Changing Climate? *Frontiers in Marine Science* 7.
- 523 Fraik, A. K., J. R. McMillan, M. Liermann, T. Bennett, M. L. McHenry, G. J. McKinney, A. H. Wells, G. Winans, J. L. Kelley, G. R. Pess, and K. M. Nichols. 2021. The Impacts of Dam Construction and Removal on the Genetics of Recovering Steelhead (*Oncorhynchus mykiss*) Populations across the Elwha River Watershed. *Genes* 12.
- 524 Franco, M. E., S. R. Burket, J. L. Sims, L. M. Lovin, K. R. Scarlett, K. Stroski, R. Steenbeek, C. Ashcroft, M. Luers, B. W. Brooks, and R. Lavado. 2020. Multi-approach assessment for the evaluation of spatio-temporal estrogenicity in fish from effluent-dominated surface waters under low instream flow. *Environmental Pollution* 265.
- 525 Franke, A., and C. Clemmesen. 2011. Effect of ocean acidification on early life stages of Atlantic herring (*Clupea harengus* L.). *Biogeosciences* 8:3697-3707.
- 526 Franklin, D. A., and L. L. Edward. 2019. Ammonia toxicity and adaptive response in marine fishes - A review. *Indian Journal of Geo-Marine Sciences* 48:273-279.
- 527 Fraser, D. J. 2014. Evolutionary hypotheses for a constraint to life-history resilience in depleted *Salmo salar* populations. *Journal of Fish Biology* 85:119-131.
- 528 Fraser, G. S., P. W. DeHaan, C. T. Smith, J. F. Von Bagen, M. R. Cooper, and T. J. Desgrosseillier. 2020. Overlap of Spatial and Temporal Spawning Distributions of Spring and Summer Chinook Salmon Results in Hybridization in the Upper Columbia River. *Transactions of the American Fisheries Society* 149:517-531.
- 529 Fraser, T. W. K., P. G. Fjellidal, R. W. Schulz, B. Norberg, and T. J. Hansen. 2019. Termination of puberty in out-of-season male Atlantic salmon smolts. *Comparative Biochemistry and Physiology a-Molecular & Integrative*
- 530 Frechette, D. M., M. Dionne, J. J. Dodson, and N. E. Bergeron. 2021. Atlantic Salmon Movement Patterns and Habitat Use during Colonization of Novel Habitat. *Transactions of the American Fisheries Society* 150:327-344.
- 531 Frechette, D. M., S. J. Dugdale, J. J. Dodson, and N. E. Bergeron. 2018. Understanding summertime thermal refuge use by adult Atlantic salmon using remote sensing, river temperature monitoring, and acoustic telemetry.
- 532 Freshwater, C., M. Trudel, T. D. Beacham, S. C. H. Grant, S. C. Johnson, C. E. M. Neville, S. Tucker, and F. Juanes. 2017. Effects of density during freshwater and early marine rearing on juvenile sockeye salmon size, growth, and
- 533 Freshwater, C., S. C. Anderson, K. R. Holt, A. M. Huang, and C. A. Holt. 2019. Weakened portfolio effects constrain management effectiveness for population aggregates. *Ecological Applications* 29:14.
- 534 Freshwater, C., S. C. Anderson, T. D. Beacham, W. Luedke, C. Wor, and J. King. 2021. An integrated model of seasonal changes in stock composition and abundance with an application to Chinook salmon. *PeerJ* 9:e11163.
- 535 Friedland, K. D., and C. D. Todd. 2012. Changes in Northwest Atlantic arctic and subarctic conditions and the growth response of Atlantic salmon. *Polar Biology* 35:593-609.
- 536 Friedland, K. D., B. R. Ward, D. W. Welch, and S. A. Hayes. 2014. Postsmolt growth and thermal regime define the marine survival of steelhead from the Keogh River, British Columbia. *Marine and Coastal Fisheries* 6:1-11.
- 537 Friedland, K. D., B. V. Shank, C. D. Todd, P. McGinnity, and J. A. Nye. 2014. Differential response of continental stock complexes of Atlantic salmon (*Salmo salar*) to the Atlantic Multidecadal Oscillation. *Journal of Marine*
- 538 Friedland, K. D., J. P. Manning, J. S. Link, J. R. Gilbert, A. T. Gilbert, and A. F. O'Connell. 2012. Variation in wind and piscivorous predator fields affecting the survival of Atlantic salmon, *Salmo salar*, in the Gulf of Maine. *Fisheries*
- 539 Friedman, W. R., B. T. Martin, B. K. Wells, P. Warzybok, C. J. Michel, E. M. Danner, and S. T. Lindley. 2019. Modeling composite effects of marine and freshwater processes on migratory species. *Ecosphere* 10:21.
- 540 Friedman, W. R., J. A. Santora, I. D. Schroeder, D. D. Huff, R. D. Brodeur, J. C. Field, and B. K. Wells. 2018. Environmental and geographic relationships among salmon forage assemblages along the continental shelf of the
- 541 Frommel, A. Y., A. Schubert, U. Piatkowski, and C. Clemmesen. 2013. Egg and early larval stages of Baltic cod, *Gadus morhua*, are robust to high levels of ocean acidification. *Marine Biology* 160:1825-1834.
- 542 Frommel, A. Y., J. Carless, B. P. V. Hunt, and C. J. Brauner. 2020. Physiological resilience of pink salmon to naturally occurring ocean acidification. *Conservation Physiology* 8.

- 543 Frost, A. J., J. S. Thomson, C. Smith, H. C. Burton, B. Davis, P. C. Watts, and L. U. Sneddon. 2013. Environmental change alters personality in the rainbow trout, *Oncorhynchus mykiss*. *Animal Behaviour* 85:1199-1207.
- 544 Frost, T. J., E. M. Yasumiishi, B. A. Agler, M. D. Adkison, and M. V. McPhee. 2020. Density-dependent effects of eastern Kamchatka pink salmon (*Oncorhynchus gorbuscha*) and Japanese chum salmon (*O. keta*) on age-specific growth of western Alaska chum salmon. *Fisheries and Oceanography* 00:1-11.
- 545 Frost, T. J., E. M. Yasumiishi, B. A. Agler, M. D. Adkison, and M. V. McPhee. 2021. Density-dependent effects of eastern Kamchatka pink salmon (*Oncorhynchus gorbuscha*) and Japanese chum salmon (*O. keta*) on age-specific growth of western Alaska chum salmon. *Fisheries Oceanography* 30:99-109.
- 546 Fuhrman, A. E., D. A. Larsen, E. A. Steel, G. Young, and B. R. Beckman. 2018. Chinook salmon emergence phenotypes: Describing the relationships between temperature, emergence timing and condition factor in a
- 547 Fukushima, M., H. Shimazaki, P. S. Rand, and M. Kaeriyama. 2011. Reconstructing Sakhalin taimen *Parahucho perryi* historical distribution and identifying causes for local extinctions. *Transactions of the American Fisheries*
- 548 Fukuwaka, M. A., and N. D. Davis. 2021. Responses of a pelagic fish community to reduced fishing pressure in the central Bering Sea. *Marine Ecology Progress Series* 673:183-192.
- 549 Fullerton, A. H., B. J. Burke, J. J. Lawler, C. E. Torgersen, J. L. Ebersole, and S. G. Leibowitz. 2017. Simulated juvenile salmon growth and phenology respond to altered thermal regimes and stream network shape. *Ecosphere* 8:1-23.
- 550 Fullerton, A. H., C. E. Torgersen, J. J. Lawler, E. A. Steel, J. L. Ebersole, and S. Y. Lee. 2018. Longitudinal thermal heterogeneity in rivers and refugia for coldwater species: effects of scale and climate change. *Aquatic Sciences*
- 551 Furey, N. B., E. G. Martins, and S. G. Hinch. 2021. Migratory salmon smolts exhibit consistent interannual compensatory predator swamping: Effects on telemetry-based survival estimates. *Ecology of Freshwater Fish* 30:18-
- 552 Gale, M. K., S. G. Hinch, and M. R. Donaldson. 2013. The role of temperature in the capture and release of fish.
- 553 Gale, M. K., S. G. Hinch, E. J. Eliason, S. J. Cooke, and D. A. Patterson. 2011. Physiological impairment of adult sockeye salmon in fresh water after simulated capture-and-release across a range of temperatures. *Fisheries*
- 554 Gallagher, C. P., M. B. Courtney, A. C. Seitz, E. V. Lea, and K. L. Howland. 2021. Ocean-entry timing and marine habitat-use of Canadian Dolly Varden: Dispersal among conservation, hydrocarbon exploration, and shipping
- 555 Gallardo-Hidalgo, J., A. Barria, G. M. Yoshida, and J. M. Yanez. 2021. Genetics of growth and survival under chronic heat stress and trade-offs with growth- and robustness-related traits in rainbow trout. *Aquaculture* 531.
- 556 Gamble, M. M., K. A. Connelly, J. R. Gardner, J. W. Chamberlin, K. I. Warheit, and D. A. Beauchamp. 2018. Size, growth, and size-selective mortality of subyearling Chinook salmon during early marine residence in Puget Sound.
- 557 Gamperl, A. K., and D. A. Syme. 2021. Temperature effects on the contractile performance and efficiency of oxidative muscle from a eurythermal versus a stenothermal salmonid. *Journal of Experimental Biology* 224.
- 558 Gamperl, A. K., O. O. Ajiboye, F. S. Zanuzzo, R. M. Sandrelli, E. D. C. Peroni, and A. Beemelmans. 2020. The impacts of increasing temperature and moderate hypoxia on the production characteristics, cardiac morphology
- 559 Gao, K. S., E. W. Helbling, D. P. Hader, and D. A. Hutchins. 2012. Responses of marine primary producers to interactions between ocean acidification, solar radiation, and warming. *Marine Ecology Progress Series* 470:167-
- 560 Garvin, M. R., G. H. Thorgaard, and S. R. Narum. 2015. Differential Expression of Genes that Control Respiration Contribute to Thermal Adaptation in Redband Trout (*Oncorhynchus mykiss gairdneri*). *Genome Biology and*
- 561 Gauthier, J., I. Gregory-Eaves, L. Bunting, P. R. Leavitt, T. Tran, L. Godbout, B. P. Finney, D. E. Schindler, G. J. Chen, G. Holtgrieve, M. Shapley, and D. T. Selbie. 2021. Ecological dynamics of a peri-urban lake: a multi-proxy paleolimnological study of Cultus Lake (British Columbia) over the past similar to 200 years. *Journal of*
- 562 Gayeski, N. J., J. A. Stanford, D. R. Montgomery, J. Lichatowich, R. M. Peterman, and R. N. Williams. 2018. The failure of wild salmon management: Need for a place-based conceptual foundation. *Fisheries* 43:303-309.
- 563 Ge, J., M. Huang, Y. E. Zhou, C. Y. Liu, C. Han, Q. F. Gao, Y. W. Dong, and S. L. Dong. 2021. Effects of different temperatures on seawater acclimation in rainbow trout *Oncorhynchus mykiss*: osmoregulation and branchial phospholipid fatty acid composition. *Journal of Comparative Physiology B-Biochemical Systems and*
- 564 Ge, J., M. Huang, Y. E. Zhou, Q. L. Deng, R. X. Liu, Q. F. Gao, Y. W. Dong, and S. L. Dong. 2021. Effects of seawater acclimation at constant and diel cyclic temperatures on growth, osmoregulation and branchial phospholipid fatty acid composition in rainbow trout *Oncorhynchus mykiss*. *Journal of Comparative Physiology B-Biochemical*
- 565 Geary, W. L., M. Bode, T. S. Doherty, E. A. Fulton, D. G. Nimmo, A. I. T. Tulloch, V. J. D. Tulloch, and E. G. Ritchie. 2020. A guide to ecosystem models and their environmental applications. *Nature Ecology & Evolution* 4:1459-
- 566 Geist, D. R., E. V. Arntzen, C. J. Murray, K. E. McGrath, Y. J. Bott, and T. P. Hanrahan. 2008. Influence of river level on temperature and hydraulic gradients in chum and fall Chinook salmon spawning areas downstream of Bonneville Dam, Columbia river. *North American Journal of Fisheries Management* 28:30-41.

567 Geist, D. R., Z. Deng, R. P. Mueller, S. R. Brink, and J. A. Chandler. 2010. Survival and growth of juvenile Snake River  
fall Chinook salmon exposed to constant and fluctuating temperatures. *Transactions of the American Fisheries*

568 Geist, D. R., Z. Q. Deng, R. P. Mueller, V. Cullinan, S. Brink, and J. A. Chandler. 2011. The effect of fluctuating  
temperatures and ration levels on the growth of juvenile Snake River fall chinook salmon. *Transactions of the*

569 Genner, M. J., D. W. Sims, A. J. Southward, G. C. Budd, P. Masterson, M. McHugh, P. Rendle, E. J. Southall, V. J.  
Wearmouth, and S. J. Hawkins. 2010. Body size-dependent responses of a marine fish assemblage to climate  
change and fishing over a century-long scale. *Global Change Biology* 16:517-527.

570 Georga, I., and G. Koumoundouros. 2010. Thermally induced plasticity of body shape in adult zebrafish *Danio rerio*  
(Hamilton, 1822). *Journal of Morphology* 271:1319-1327.

571 Gerber, L., K. A. Clow, and A. K. Gamperl. 2021. Acclimation to warm temperatures has important implications for  
mitochondrial function in Atlantic salmon (*Salmo salar*). *Journal of Experimental Biology* 224.

572 Gerber, L., K. A. Clow, F. C. Mark, and A. K. Gamperl. 2020. Improved mitochondrial function in salmon (*Salmo*  
*salar*) following high temperature acclimation suggests that there are cracks in the proverbial 'ceiling'. *Scientific*

573 Gervais, J. A., R. Kovach, A. Sepulveda, R. Al-Chokhachy, J. J. Giersch, and C. C. Muhlfeld. 2020. Climate-induced  
expansions of invasive species in the Pacific Northwest, North America: a synthesis of observations and

574 Gerwing, T. G., and E. Plate. 2019. Effectiveness of nutrient enhancement as a remediation or compensation  
strategy of salmonid fisheries in culturally oligotrophic lakes and streams in temperate climates. *Restoration*

575 Gharrett, A. J., J. Joyce, and W. W. Smoker. 2013. Fine-scale temporal adaptation within a salmonid population:  
Mechanism and consequences. *Molecular Ecology* 22:4457-4469.

576 Gibble, C. M., R. M. Kudela, S. Knowles, B. Bodenstein, and K. A. Lefebvre. 2021. Domoic acid and saxitoxin in  
seabirds in the United States between 2007 and 2018. *Harmful Algae* 103.

577 Gibeau, P., and W. J. Palen. 2020. Predicted effects of flow diversion by Run-of-River hydropower on bypassed  
stream temperature and bioenergetics of salmonid fishes. *River Research and Applications* 36:1903-1915.

578 Gibeau, P., and W. J. Palen. 2021. Impacts of run-of-river hydropower on coho salmon (*Oncorhynchus kisutch*):  
the role of density-dependent survival. *Ecosphere* 12.

579 Gienapp, P., T. E. Reed, and M. E. Visser. 2014. Why climate change will invariably alter selection pressures on  
phenology. *Proceedings of the Royal Society B-Biological Sciences* 281.

580 Gilbert, M. J. H., and K. B. Tierney. 2018. Warm northern river temperatures increase post-exercise fatigue in an  
Arctic migratory salmonid but not in a temperate relative. *Functional Ecology* 32:687-700.

581 Gilbert, M. J. H., L. N. Harris, B. K. Malley, A. Schimnowski, J. S. Moore, and A. P. Farrell. 2020. The thermal limits  
of cardiorespiratory performance in anadromous Arctic char (*Salvelinus alpinus*): a field-based investigation using

582 Gibbey, J., K. R. Utne, V. Wennevik, A. C. Beck, K. Kausrud, K. Hindar, C. G. de Leaniz, C. Cherbonnel, J. Coughlan, T.  
F. Cross, E. Dillane, D. Ensing, E. Garcia-Vazquez, L. R. Hole, M. Holm, J. C. Holst, J. A. Jacobsen, A. J. Jensen, S.  
Karlsson, N. O. Maoileidigh, K. A. Mork, E. E. Nielsen, L. Nottestad, C. R. Primmer, P. Prodohl, S. Prusov, J. R.  
Stevens, K. Thomas, K. Whelan, P. McGinnity, and E. Verspoor. 2021. The early marine distribution of Atlantic

583 Gillson, J. P., D. L. Maxwell, S. D. Gregory, P. E. Posen, W. D. Riley, J. L. Picken, and M. G. L. Assuncao. 2020. Can  
aspects of the discharge regime associated with juvenile Atlantic salmon (*Salmo salar* L.) and trout (*S. trutta* L.)  
densities be identified using historical monitoring data from five UK rivers? *Fisheries Management and Ecology*

584 Giroux, M., and D. Schlenk. 2021. The effects of temperature and salinity on the endocrinology in two life stages  
of juvenile rainbow/steelhead trout (*Oncorhynchus mykiss*). *Journal of Fish Biology* 99:513-523.

585 Giroux, M., J. Gan, and D. Schlenk. 2019. The effects of bifenthrin and temperature on the endocrinology of  
juvenile Chinook salmon. *Environmental Toxicology and Chemistry* 38:852-861.

586 Glasgow, J., J. D. De Groot, and M. P. Small. 2020. Genetic composition and conservation status of coastal  
cutthroat trout (*Oncorhynchus clarki clarki*) in the San Juan Islands, Washington. *Conservation Genetics* 21:181-

587 Glibert, P. M. 2020. Harmful algae at the complex nexus of eutrophication and climate change. *Harmful Algae* 91.

588 Gliwicz, Z. M., E. Babkiewicz, R. Kumar, S. Kunjiappan, and K. Leniowski. 2018. Warming increases the number of  
apparent prey in reaction field volume of zooplanktivorous fish. *Limnology and Oceanography* 63:S30-S43.

589 Glover, R. S., C. Soulsby, R. J. Fryer, C. Birkel, and I. A. Malcolm. 2020. Quantifying the relative importance of stock  
level, river temperature and discharge on the abundance of juvenile Atlantic salmon (*Salmo salar*). *Ecohydrology*

590 Gobler, C. J. 2020. Climate Change and Harmful Algal Blooms: Insights and perspective. *Harmful Algae* 91:101731.

591 Godwin, S. C., M. D. Fast, A. Kuparinen, K. E. Medcalf, and J. A. Hutchings. 2020. Increasing temperatures  
accentuate negative fitness consequences of a marine parasite. *Scientific Reports* 10.



592 Goertler, P. A. L., T. R. Sommer, W. H. Satterthwaite, and B. M. Schreier. 2018. Seasonal floodplain-tidal slough  
complex supports size variation for juvenile Chinook salmon (*Oncorhynchus tshawytscha*). *Ecology of Freshwater*

593 Goertler, P., B. Mahardja, and T. Sommer. 2021. Striped bass (*Morone saxatilis*) migration timing driven by estuary  
outflow and sea surface temperature in the San Francisco Bay-Delta, California. *Scientific Reports* 11.

594 Goertler, P., K. Jones, J. Cordell, B. Schreier, and T. Sommer. 2018. Effects of extreme hydrologic regimes on  
juvenile Chinook salmon prey resources and diet composition in a large river floodplain. *Transactions of the*

595 Goetz, F. A., and T. P. Quinn. 2019. Behavioral thermoregulation by adult Chinook salmon (*Oncorhynchus*  
*tshawytscha*) in estuary and freshwater habitats prior to spawning. *Fishery Bulletin* 117:258-271.

596 Goetz, F. A., E. Beamer, E. J. Connor, E. Jeanes, C. Kinsel, J. W. Chamberlin, C. Morello, and T. P. Quinn. 2021. The  
timing of anadromous bull trout migrations in estuarine and marine waters of Puget Sound, Washington.

597 Gonzalez-Ferreras, A. M., E. Bertuzzo, J. Barquin, L. Carraro, C. Alonso, and A. Rinaldo. 2019. Effects of altered  
river network connectivity on the distribution of *Salmo trutta*: Insights from a metapopulation model. *Freshwater*

598 Goode, J. R., J. M. Buffington, D. Tonina, D. J. Isaak, R. F. Thurow, S. Wenger, D. Nagel, C. Luce, D. Tetzlaff, and C.  
Soulsby. 2013. Potential effects of climate change on streambed scour and risks to salmonid survival in snow-

599 Goodwin, R. A., M. Politano, J. W. Garvin, J. M. Nestler, D. Hay, J. J. Anderson, L. J. Weber, E. Dimperio, D. L. Smith,  
and M. Timko. 2014. Fish navigation of large dams emerges from their modulation of flow field experience.  
*Proceedings of the National Academy of Sciences of the United States of America* 111:5277-5282.

600 Gorgoglione, B., C. Bailey, and J. A. Ferguson. 2020. Proliferative kidney disease in Alaskan salmonids with  
evidence that pathogenic myxozoans may be emerging north. *International Journal for Parasitology* 50:797-807.

601 Gorokhov, M. N., V. V. Volobuev, A. A. Smirnov, and A. V. Yamborko. 2021. Comparative Characteristic of the  
Biological Structure, Stock Status, and Commercial Fishing Use of Pacific Salmons (*Oncorhynchus*, *Salmonidae*) of  
the Magadan Region in the end of the 20th and Early 21st Centuries. *Journal of Ichthyology* 61:594-607.

602 Gosselin, J. L., and J. J. Anderson. 2017. Combining migration history, river conditions, and fish condition to  
examine cross-life-stage effects on marine survival in Chinook salmon. *Transactions of the American Fisheries*

603 Gosselin, J. L., and J. J. Anderson. 2020. Step-patterned survivorship curves: Mortality and loss of equilibrium  
responses to high temperature and food restriction in juvenile rainbow trout (*Oncorhynchus mykiss*). *Plos One* 15.

604 Gosselin, J. L., E. R. Buhle, C. Van Holmes, W. N. Beer, S. Iltis, and J. J. Anderson. 2021. Role of carryover effects in  
conservation of wild Pacific salmon migrating regulated rivers. *Ecosphere* 12.

605 Gosselin, J. L., L. G. Crozier, and B. J. Burke. 2021. Shifting signals: Correlations among freshwater, marine and  
climatic indices often investigated in Pacific salmon studies. *Ecological Indicators* 121.

606 Gosselin, J. L., R. W. Zabel, J. J. Anderson, J. R. Faulkner, A. M. Baptista, and B. P. Sandford. 2018. Conservation  
planning for freshwater-marine carryover effects on Chinook salmon survival. *Ecology and Evolution* 8:319-332.

607 Gould, G. K., M. L. Liu, M. E. Barber, K. A. Cherkauer, P. R. Robichaud, and J. C. Adam. 2016. The effects of climate  
change and extreme wildfire events on runoff erosion over a mountain watershed. *Journal of Hydrology* 536:74-

608 Goulding, A. T., and A. P. Farrell. 2020. The effect of temperature acclimation on the force-frequency relationship  
and adrenergic sensitivity of the ventricle of two populations of juvenile sockeye salmon. *Journal of Comparative*  
*Physiology B-Biochemical Systems and Environmental Physiology* 190:717-730.

609 Gourtay, C., D. Chabot, C. Audet, H. Le Delliou, P. Quazuguel, G. Claireaux, and J. L. Zambonino-Infante. 2018. Will  
global warming affect the functional need for essential fatty acids in juvenile sea bass (*Dicentrarchus labrax*)? A  
first overview of the consequences of lower availability of nutritional fatty acids on growth performance. *Marine*

610 Grah, O., T. Coe, M. Maudlin, N. Currence, J. Beaulieu, S. Klein, J. Butcher, H. Herron, and T. Beechie. 2016.  
Qualitative Assessment: Evaluating the impacts of climate change on endangered species act recovery actions for

611 Graham, C., E. A. Pakhomov, and B. P. V. Hunt. 2020. A salmon diet database for the North Pacific Ocean.

612 Graham, C., E. A. Pakhomov, and B. P. V. Hunt. 2021. Meta-Analysis of Salmon Trophic Ecology Reveals Spatial and  
Interspecies Dynamics Across the North Pacific Ocean. *Frontiers in Marine Science* 8.

613 Grainger, T. N., and J. M. Levine. 2022. Rapid evolution of life-history traits in response to warming, predation and  
competition: A meta-analysis. *Ecology Letters* 25:541-554.

614 Gregory, R., J. Arvai, and L. R. Gerber. 2013. Structuring decisions for managing threatened and endangered  
species in a changing climate. *Conservation Biology* 27:1212-1221.

615 Gregory, S. D., A. T. Ibbotson, W. D. Riley, M. Nevoux, R. B. Lauridsen, I. C. Russell, J. R. Britton, P. K. Gillingham, O.  
M. Simmons, and E. Rivot. 2019. Atlantic salmon return rate increases with smolt length. *Ices Journal of Marine*

616 Gregory, S. D., J. D. Armstrong, and J. R. Britton. 2018. Is bigger really better? Towards improved models for  
testing how Atlantic salmon *Salmo salar* smolt size affects marine survival. *Journal of Fish Biology* 92:579-592.

617 Gregory, S. D., V. E. Bewes, A. J. H. Davey, D. E. Roberts, P. Gough, and I. C. Davidson. 2020. Environmental conditions modify density-dependent salmonid recruitment: Insights into the 2016 recruitment crash in Wales.

618 Grenier, G., and R. F. Tallman. 2021. Lifelong divergence of growth patterns in Arctic charr life history strategies: implications for sustainable fisheries in a changing climate. *Arctic Science* 7:454-470.

619 Griffiths, R. B., and J. Howard. 2012. Oceans and Marine Resources in a Changing Climate. Technical Input to the 2013 National Climate Assessment. U.S. Global Change Research Program: Available at

620 Griffith, A. W., and C. J. Gobler. 2020. Harmful algal blooms: A climate change co-stressor in marine and freshwater ecosystems. *Harmful Algae* 91:101590.

621 Griffiths, J. R., and D. E. Schindler. 2012. Consequences of changing climate and geomorphology for bioenergetics of juvenile sockeye salmon in a shallow Alaskan lake. *Ecology of Freshwater Fish* 21:349-362.

622 Griffiths, J. R., D. E. Schindler, G. T. Ruggerone, and J. D. Bumgarner. 2014. Climate variation is filtered differently among lakes to influence growth of juvenile sockeye salmon in an Alaskan watershed. *Oikos* 123:687-698.

623 Groffman, P., and P. Kareiva. 2013. Ecosystems, Biodiversity, and Ecosystem Services. Page Available at: <http://ncadac.globalchange.gov/> Technical Input to the National Climate Assessment.

624 Gross, E. S., R. C. Holleman, M. J. Thomas, N. A. Fangue, and A. L. Rypel. 2021. Development and Evaluation of a Chinook Salmon Smolt Swimming Behavior Model. *Water* 13.

625 Groves, P. A., J. A. Chandler, and T. J. Richter. 2008. Comparison of temperature data collected from artificial Chinook salmon redds and surface water in the Snake River. *North American Journal of Fisheries Management*

626 Guill, C., E. Carmack, and B. Drossel. 2014. Exploring cyclic dominance of sockeye salmon with a predator-prey model. *Canadian Journal of Fisheries and Aquatic Sciences* 71:959-972.

627 Haak, A. L., and J. E. Williams. 2012. Spreading the risk: Native trout management in a warmer and less-certain future. *North American Journal of Fisheries Management* 32:387-401.

628 Haeseker, S. L., G. Scheer, and J. McCann. 2020. Avian Predation on Steelhead is Consistent with Compensatory Mortality. *Journal of Wildlife Management* 84:1164-1178.

629 Haeseker, S. L., J. A. McCann, J. Tuomikoski, and B. Chockley. 2012. Assessing freshwater and marine environmental influences on life-stage-specific survival rates of Snake River spring-summer Chinook salmon and

630 Hafen, K. C., K. W. Blasch, A. Rea, R. Sando, and P. E. Gessler. 2020. The Influence of Climate Variability on the Accuracy of NHD Perennial and Nonperennial Stream Classifications. *Journal of the American Water Resources*

631 Hague, M. J., and D. A. Patterson. 2014. Evaluation of statistical river temperature forecast models for fisheries management. *North American Journal of Fisheries Management* 34:132-146.

632 Hague, M. J., M. R. Ferrari, J. R. Miller, D. A. Patterson, G. L. Russell, A. P. Farrell, and S. G. Hinch. 2011. Modelling the future hydroclimatology of the lower Fraser River and its impacts on the spawning migration survival of

633 Hall, A., Y. C. Chiu, and J. S. Selker. 2020. Coupling high-resolution monitoring and modelling to verify restoration-based temperature improvements. *River Research and Applications* 36:1430-1441.

634 Hall, J. E., C. M. Greene, O. Stefankiv, J. H. Anderson, B. Timpane-Padgham, T. J. Beechie, and G. R. Pess. 2018. Large river habitat complexity and productivity of Puget Sound Chinook salmon. *Plos One* 13:e0205127.

635 Hallett, S. L., R. A. Ray, C. N. Hurst, R. A. Holt, G. R. Buckles, S. D. Atkinson, and J. L. Bartholomew. 2012. Density of the waterborne parasite *Ceratomyxa shasta* and its biological effects on salmon. *Applied and Environmental*

636 Hallnan, R., L. Saito, D. Busby, and S. Tyler. 2020. Modeling Shasta Reservoir Water-Temperature Response to the 2015 Drought and Response under Future Climate Change. *Journal of Water Resources Planning and Management*

637 Halofsky, J. E., D. L. Peterson, and B. J. Harvey. 2020. Changing wildfire, changing forests: the effects of climate change on fire regimes and vegetation in the Pacific Northwest, USA. *Fire Ecology* 16.

638 Hamre, L. A., S. Bui, F. Oppedal, R. Skern-Mauritzen, and S. Dalvin. 2019. Development of the salmon louse *Lepeophtheirus salmonis* parasitic stages in temperatures ranging from 3 to 24 degrees C. *Aquaculture*

639 Hand, B. K., C. C. Muhlfeld, A. A. Wade, R. P. Kovach, D. C. Whited, S. R. Narum, A. P. Matala, M. W. Ackerman, B. A. Garner, J. S. Kimball, J. A. Stanford, and G. Luikart. 2016. Climate variables explain neutral and adaptive variation within salmonid metapopulations: the importance of replication in landscape genetics. *Molecular*

640 Handeland, S. O., A. K. Imsland, B. T. Bjornsson, and S. O. Stefansson. 2013. Long-term effects of photoperiod, temperature and their interaction on growth, gill Na<sup>+</sup>, K<sup>+</sup>-ATPase activity, seawater tolerance and plasma growth-hormone levels in Atlantic salmon *Salmo salar*. *Journal of Fish Biology* 83:1197-1209.

641 Handeland, S. O., A. K. Imsland, L. O. E. Ebbesson, T. O. Nilsen, C. D. Hosfeld, H. C. Teien, and S. O. Stefansson. 2014. Osmoregulation and growth in offspring of wild Atlantic salmon at different temperatures. *Environmental*

642 Handeland, S. O., A. K. Imsland, T. O. Nilsen, L. O. E. Ebbesson, C. D. Hosfeld, C. Pedrosa, H. Toften, and S. O. Stefansson. 2014. Osmoregulation in Atlantic salmon *Salmo salar* smolts transferred to seawater at different

643 Hanrahan, T. P. 2008. Effects of river discharge on hyporheic exchange flows in salmon spawning areas of a large gravel-bed river. *Hydrological Processes* 22:127-141.

644 Hanson, K. C., and D. P. Peterson. 2014. Modeling the potential impacts of climate change on Pacific salmon culture programs: An example at Winthrop National Fish Hatchery. *Environmental Management* 54:433-448.

645 Hanson, M. B., C. K. Emmons, M. J. Ford, M. Everett, K. Parsons, L. K. Park, J. Hempelmann, D. M. Van Doornik, G. S. Schorr, J. K. Jacobsen, M. F. Sears, M. S. Sears, J. G. Sneva, R. W. Baird, and L. Barre. 2021. Endangered predators and endangered prey: Seasonal diet of Southern Resident killer whales. *Plos One* 16.

646 Harbicht, A. B., D. J. Fraser, and W. R. Ardren. 2020. Minor shifts towards more natural conditions in captivity improve long-term survival among reintroduced Atlantic salmon. *Canadian Journal of Fisheries and Aquatic*

647 Hardiman, J. M., and M. G. Mesa. 2014. The effects of increased stream temperatures on juvenile steelhead growth in the Yakima River Basin based on projected climate change scenarios. *Climatic Change* 124:413-426.

648 Hare, J. A., W. E. Morrison, M. W. Nelson, M. M. Stachura, E. J. Teeters, R. B. Griffis, M. A. Alexander, J. D. Scott, L. Alade, R. J. Bell, A. S. Chute, K. L. Curti, T. H. Curtis, D. Kircheis, J. F. Kocik, S. M. Lucey, C. T. McCandless, L. M. Milke, D. E. Richardson, E. Robillard, H. J. Walsh, M. C. McManus, K. E. Marancik, and C. A. Griswold. 2016. A vulnerability assessment of fish and invertebrates to climate change on the Northeast U.S. Continental Shelf. *Plos*

649 Harkonen, L., P. Louhi, R. Huusko, and A. Huusko. 2021. Wintertime growth in Atlantic salmon under changing climate: the importance of ice cover for individual growth dynamics. *Canadian Journal of Fisheries and Aquatic*

650 Harnish, R. A., G. E. Johnson, G. A. McMichael, M. S. Hughes, and B. D. Ebberts. 2012. Effect of migration pathway on travel time and survival of acoustic-tagged juvenile salmonids in the Columbia River estuary. *Transactions of*

651 Harstad, D. L., D. A. Larsen, J. Miller, I. Adams, D. K. Spangenberg, S. Nance, L. Rohrbach, J. G. Murauskas, and B. R. Beckman. 2018. Winter-rearing temperature affects growth profiles, age of maturation, and smolt-to-adult returns for yearling summer Chinook salmon in the Upper Columbia River Basin. *North American Journal of*

652 Hartman, K. J., and M. A. Porto. 2014. Thermal performance of three rainbow trout strains at above-optimal temperatures. *Transactions of the American Fisheries Society* 143:1445-1454.

653 Haskell, C. A., D. A. Beauchamp, and S. M. Bollens. 2017. Linking functional response and bioenergetics to estimate juvenile salmon growth in a reservoir food web. *Plos One* 12:e0185933.

654 Hasler, C. T., B. Mossop, D. A. Patterson, S. G. Hinch, and S. J. Cooke. 2012. Swimming activity of migrating Chinook salmon in a regulated river. *Aquatic Biology* 17:47-56.

655 Hasler, C. T., J. D. Jeffrey, E. V. C. Schneider, K. D. Hannan, J. A. Tix, and C. D. Suski. 2018. Biological consequences of weak acidification caused by elevated carbon dioxide in freshwater ecosystems. *Hydrobiologia* 806:1-12.

656 Hasler, C. T., S. J. Cooke, S. G. Hinch, E. Guimond, M. R. Donaldson, B. Mossop, and D. A. Patterson. 2012. Thermal biology and bioenergetics of different upriver migration strategies in a stock of summer-run Chinook salmon.

657 Hasnain, S. S., B. J. Shuter, and C. K. Minns. 2013. Phylogeny influences the relationships linking key ecological thermal metrics for North American freshwater fish species. *Canadian Journal of Fisheries and Aquatic Sciences*

658 Hasnain, S. S., M. D. Escobar, and B. J. Shuter. 2018. Estimating thermal response metrics for North American freshwater fish using Bayesian phylogenetic regression. *Canadian Journal of Fisheries and Aquatic Sciences*

659 Hasselman, D. J., R. A. Hinrichsen, B. A. Shields, and C. C. Ebbesmeyer. 2012. American shad of the Pacific Coast: A harmful invasive species or benign introduction? *Fisheries* 37:115-122.

660 Hatten, J. R., T. R. Batt, P. J. Connolly, and A. G. Maule. 2014. Modeling effects of climate change on Yakima River salmonid habitats. *Climatic Change* 124:427-439.

661 Hauton, C., T. Tyrrell, and J. Williams. 2009. The subtle effects of sea water acidification on the amphipod *Gammarus locusta*. *Biogeosciences* 6:1479-1489.

662 Hawkins, B. L., A. H. Fullerton, B. L. Sanderson, and E. A. Steel. 2020. Individual-based simulations suggest mixed impacts of warmer temperatures and a nonnative predator on Chinook salmon. *Ecosphere* 11.

663 Hayes, D. B., B. J. Bellgraph, B. M. Roth, D. D. Dauble, and R. P. Mueller. 2014. Timing of redd construction by fall Chinook salmon in the Hanford Reach of the Columbia River. *River Research and Applications* 30:1110-1119.

664 Hayes, D. S., J. M. Brandle, C. Seliger, B. Zeiringer, T. Ferreira, and S. Schmutz. 2018. Advancing towards functional environmental flows for temperate floodplain rivers. *Science of the Total Environment* 633:1089-1104.

665 Hayes, D. S., M. Moreira, I. Boavida, M. Haslauer, G. Unfer, B. Zeiringer, F. Greimel, S. Auer, T. Ferreira, and S. Schmutz. 2019. Life Stage-Specific Hydropeaking Flow Rules. *Sustainability* 11:17.

- 666 Hayes, J. W., D. A. Olsen, and J. Hay. 2010. The influence of natural variation in discharge on juvenile brown trout population dynamics in a nursery tributary of the Motueka River, New Zealand. *New Zealand Journal of Marine*
- 667 Hayes, M. C., S. Hodgson, C. S. Ellings, W. D. Duval, and S. P. Rubin. 2019. Seasonal Use of a Nonnatal Marine Basin by Juvenile Hatchery Chinook Salmon. *Marine and Coastal Fisheries* 11:437-453.
- 668 Hayes, S. A., and J. F. Kocik. 2014. Comparative estuarine and marine migration ecology of Atlantic salmon and steelhead: blue highways and open plains. *Reviews in Fish Biology and Fisheries* 24:757-780.
- 669 Hayes, S. A., M. H. Bond, C. V. Hanson, A. W. Jones, A. J. Ammann, J. A. Harding, A. L. Collins, J. Perez, and R. B. MacFarlane. 2011. Down, up, down and smolting twice? Seasonal movement patterns by juvenile steelhead (*Oncorhynchus mykiss*) in a coastal watershed with a bar closing estuary. *Canadian Journal of Fisheries and*
- 670 Hazen, E. L., Salvador Jorgensen, Ryan R. Rykaczewski, Steven J. Bograd, David G. Foley, Ian D. Jonsen, Scott A. Shaffer, John P. Dunne, Daniel P. Costa, L. B. Crowder, and B. A. Block. 2012. Predicted habitat shifts of Pacific top
- 671 Healey, M. 2011. The cumulative impacts of climate change on Fraser River sockeye salmon (*Oncorhynchus nerka*) and implications for management. *Canadian Journal of Fisheries and Aquatic Sciences* 68:718-737.
- 672 Heath, M. R., F. C. Neat, J. K. Pinnegar, D. G. Reid, D. W. Sims, and P. J. Wright. 2012. Review of climate change impacts on marine fish and shellfish around the UK and Ireland. *Aquatic Conservation-Marine and Freshwater*
- 673 Hecht, B. C., A. P. Matala, J. E. Hess, and S. R. Narum. 2015. Environmental adaptation in Chinook salmon (*Oncorhynchus tshawytscha*) throughout their North American range. *Molecular Ecology* 24:5573-5595.
- 674 Heckel, J. W., M. C. Quist, C. J. Watkins, and A. M. Dux. 2020. Distribution and Abundance of Westslope Cutthroat Trout in Relation to Habitat Characteristics at Multiple Spatial Scales. *North American Journal of Fisheries*
- 675 Hedger, R. D., L. E. Sundt-Hansen, T. Forseth, O. Ugedal, O. H. Diserud, A. S. Kvambekk, and A. G. Finstad. 2013. Predicting climate change effects on subarctic-Arctic populations of Atlantic salmon (*Salmo salar*). *Canadian*
- 676 Hegg, J. C., B. P. Kennedy, P. M. Chittaro, and R. W. Zabel. 2013. Spatial structuring of an evolving life-history strategy under altered environmental conditions. *Oecologia* 172:1017-1029.
- 677 Heggenes, J., G. Bremset, and A. Brabrand. 2013. Visiting the hyporheic zone: Young Atlantic salmon move through the substratum. *Freshwater Biology* 58:1720-1728.
- 678 Heggenes, J., M. Stickler, K. Alfredsen, J. E. Brittain, A. Adeva-Bustos, and A. Huusko. 2021. Hydropower-driven thermal changes, biological responses and mitigating measures in northern river systems. *River Research and*
- 679 Heidari, H., T. Warziniack, T. C. Brown, and M. Arabi. 2021. Impacts of Climate Change on Hydroclimatic Conditions of US National Forests and Grasslands. *Forests* 12.
- 680 Heim, K. C., T. E. McMahon, S. T. Kalinowski, B. D. Ertel, and T. M. Koel. 2020. Abiotic conditions are unlikely to mediate hybridization between invasive rainbow trout and native Yellowstone cutthroat trout in a high-elevation metapopulation. *Canadian Journal of Fisheries and Aquatic Sciences* 77:1433-1445.
- 681 Heinle, K. B., L. A. Eby, C. C. Muhlfeld, A. Steed, L. Jones, V. D'Angelo, A. R. Whiteley, and M. Hebblewhite. 2021. Influence of water temperature and biotic interactions on the distribution of westslope cutthroat trout (*Oncorhynchus clarkii lewisi*) in a population stronghold under climate change. *Canadian Journal of Fisheries and*
- 682 Henderson, M. J., I. S. Iglesias, C. J. Michel, A. J. Ammann, and D. D. Huff. 2019. Estimating spatial-temporal differences in Chinook salmon outmigration survival with habitat- and predation-related covariates. *Canadian*
- 683 Henderson, M., J. Fiechter, D. D. Huff, and B. K. Wells. 2018. Spatial variability in ocean-mediated growth potential is linked to Chinook salmon survival. *Fisheries Oceanography* 28:334-344.
- 684 Heneghan, R. F., E. Galbraith, J. L. Blanchard, C. Harrison, N. Barrier, C. Bulman, W. Cheung, M. Coll, T. D. Eddy, M. Eauskin-Extramiana, J. D. Everett, J. A. Fernandes-Salvador, D. Gascuel, J. Guet, O. Maury, J. Palacios-Abrantes, C. M. Petrik, H. du Pontavice, A. J. Richardson, J. Steenbeek, T. C. Tai, J. Volkholz, P. A. Woodworth-Jefcoats, and D. P. Tittensor. 2021. Disentangling diverse responses to climate change among global marine ecosystem models.
- 685 Henery, R. E., T. R. Sommer, and C. R. Goldman. 2010. Growth and methylmercury accumulation in juvenile Chinook salmon in the Sacramento River and its floodplain, the Yolo Bypass. *Transactions of the American*
- 686 Herbold, B., S. M. Carlson, and R. Henery. 2018. Managing for salmon resilience in California's variable and changing climate. *San Francisco Estuary and Watershed Science* 16.
- 687 Hermann, N. T., D. T. Chaloner, B. S. Gerig, and G. A. Lamberti. 2020. Ecological consequences of Great Lakes salmon subsidies for stream-resident brook and brown trout. *Canadian Journal of Fisheries and Aquatic Sciences*
- 688 Hertz, E., M. Trudel, R. D. Brodeur, E. A. Daly, L. Eisner, E. V. Farley, J. A. Harding, R. B. MacFarlane, S. Mazumder, J. H. Moss, J. M. Murphy, and A. Mazumder. 2015. Continental-scale variability in the feeding ecology of juvenile Chinook salmon along the coastal Northeast Pacific Ocean. *Marine Ecology Progress Series* 537:247-263.

689 Hess, J. E., and S. R. Narum. 2011. Single-Nucleotide Polymorphism (SNP) loci correlated with run timing in adult Chinook salmon from the Columbia River Basin. *Transactions of the American Fisheries Society* 140:855-864.

690 Hester, E. T., and M. W. Doyle. 2011. Human impacts to river temperature and their effects on biological processes: A quantitative synthesis. *Journal of the American Water Resources Association* 47:571-587.

691 Heuer, R. M., and M. Grosell. 2014. Physiological impacts of elevated carbon dioxide and ocean acidification on fish. *American Journal of Physiology-Regulatory Integrative and Comparative Physiology* 307:R1061-R1084.

692 Hevroy, E. M., R. Waagbo, B. E. Torstensen, H. Takle, I. Stubhaug, S. M. Jorgensen, T. Torgersen, L. Tvenning, S. Susort, O. Breck, and T. Hansen. 2012. Ghrelin is involved in voluntary anorexia in Atlantic salmon raised at elevated sea temperatures. *General and Comparative Endocrinology* 175:118-134.

693 Hilker, F. M., and M. A. Lewis. 2010. Predator-prey systems in streams and rivers. *Theoretical Ecology* 3:175-193.

694 Hill, A. C., T. S. Bansak, B. K. Ellis, and J. A. Stanford. 2010. Merits and limits of ecosystem protection for conserving wild salmon in a northern coastal British Columbia river. *Ecology and Society* 15:20. Available at:

695 Hillebrand, H., I. Donohue, W. S. Harpole, D. Hodapp, M. Kucera, A. M. Lewandowska, J. Merder, J. M. Montoya, and J. A. Freund. 2020. Thresholds for ecological responses to global change do not emerge from empirical data.

696 Hillyard, R. W., and E. R. Keeley. 2012. Temperature-related changes in habitat quality and use by Bonneville cutthroat trout in regulated and unregulated river segments. *Transactions of the American Fisheries Society*

697 Hinch, S. G., N. N. Bett, E. J. Eliason, A. P. Farrell, S. J. Cooke, and D. A. Patterson. 2021. Exceptionally high mortality of adult female salmon: a large-scale pattern and a conservation concern. *Canadian Journal of Fisheries*

698 Hinch, S. G., S. J. Cooke, A. P. Farrell, K. M. Miller, M. Lapointe, and D. A. Patterson. 2012. Dead fish swimming: A review of research on the early migration and high premature mortality in adult Fraser River sockeye salmon

699 Hinrichsen, R. A., and C. M. Paulsen. 2020. Low carrying capacity a risk for threatened Chinook Salmon. *Ecological*

700 Hinrichsen, R. A., D. J. Hasselman, C. C. Ebbesmeyer, and B. A. Shields. 2013. The role of impoundments, temperature, and discharge on colonization of the Columbia River Basin, USA, by nonindigenous American Shad.

701 Hipfner, M. J., M. Galbraith, D. F. Bertram, and D. J. Green. 2020. Basin-scale oceanographic processes, zooplankton community structure, and diet and reproduction of a sentinel North Pacific seabird over a 22-year

702 Hirsch, S. L., and J. Long. 2021. Adaptive Epistemologies: Conceptualizing Adaptation to Climate Change in Environmental Science. *Science Technology & Human Values* 46:298-319.

703 Hittle, K. A., E. S. Kwon, and D. J. Coughlin. 2021. Climate change and anadromous fish: How does thermal acclimation affect the mechanics of the myotomal muscle of the Atlantic salmon, *Salmo salar*? *Journal of*

704 Ho, K. E., S. E. Webb, C. Angus, J. Beer, J. G. Williamson, L. Jamieson, and A. L. Miller. 2021. Identification of Environmental Factors that Influence the Upstream Migration of Sea Trout *Salmo trutta* in Shetland Waters.

705 Hocking, M. D., S. G. Faulkner, K. Akaoka, A. Harwood, T. Hatfield, and F. J. A. Lewis. 2021. Surprising salmonid response to water diversion at four run-of-river hydroelectric projects in British Columbia. *Canadian Journal of*

706 Hodge, B. W., M. A. Wilzbach, and W. G. Duffy. 2014. Potential fitness benefits of the half-pounder life history in Klamath River steelhead. *Transactions of the American Fisheries Society* 143:864-875.

707 Hodgson, E. E., S. M. Wilson, and J. W. Moore. 2020. Changing estuaries and impacts on juvenile salmon: A systematic review. *Global Change Biology* 26:1986-2001.

708 Hoglund, E., R. Hogberget, A. Atland, T. Haraldstad, O. Overli, and M. Vindas. 2021. Effects of repeated short episodes of environmental acidification on Atlantic salmon (*Salmo salar*) from a landlocked population. *Science of*

709 Hoglund, E., W. Korzan, A. Atland, T. Haraldstad, R. Hogberget, I. Mayer, and O. Overli. 2020. Neuroendocrine indicators of allostatic load reveal the impact of environmental acidification in fish. *Comparative Biochemistry and*

710 Hollowed, A. B., K. K. Holsman, A. C. Haynie, A. J. Hermann, A. E. Punt, K. Aydin, J. N. Ianelli, S. Kasperski, W. Cheng, A. Faig, K. A. Kearney, J. C. P. Reum, P. Spencer, I. Spies, W. Stockhausen, C. S. Szuwalski, G. A. Whitehouse, and T. K. Wilderbuer. 2020. Integrated Modeling to Evaluate Climate Change Impacts on Coupled Social-Ecological

711 Holmes, E. J., P. Saffarinia, A. L. Rypel, M. N. Bell-Tilcock, J. V. Katz, and C. A. Jeffres. 2021. Reconciling fish and farms: Methods for managing California rice fields as salmon habitat. *Plos One* 16.

712 Holsman, K. K., M. D. Scheuerell, E. Buhle, and R. Emmett. 2012. Interacting effects of translocation, artificial propagation, and environmental conditions on the marine survival of Chinook salmon from the Columbia River,

713 Holt, C. A., and C. G. J. Michielsens. 2020. Impact of time-varying productivity on estimated stock-recruitment parameters and biological reference points. *Canadian Journal of Fisheries and Aquatic Sciences* 77:836-847.

714 Honda, K., K. Shirai, S. Komatsu, and T. Saito. 2020. Sea-entry conditions of juvenile chum salmon *Oncorhynchus ketata* that improve post-sea-entry survival: a case study of the 2012 brood-year stock released from the Kushiro

715 Honda, K., T. Sato, H. Kuroda, and T. Saito. 2021. Initial growth characteristics of poor-return stocks of chum  
salmon *Oncorhynchus keta* originating from the Okhotsk and Nemuro regions in Hokkaido on the basis of scale

716 Honea, J. M., M. M. McClure, J. C. Jorgensen, and M. D. Scheuerell. 2016. Assessing freshwater life-stage  
vulnerability of an endangered Chinook salmon population to climate change influences on stream habitat.

717 Honkanen, H. M., D. L. Orrell, M. Newton, S. McKelvey, A. Stephen, R. A. Duguid, and C. E. Adams. 2021. The  
downstream migration success of Atlantic salmon (*Salmo salar*) smolts through natural and impounded standing

718 Honkanen, H. M., P. Boylan, J. A. Dodd, and C. E. Adams. 2019. Life stage-specific, stochastic environmental effects  
overlay density dependence in an Atlantic salmon population. *Ecology of Freshwater Fish* 28:156-166.

719 Hooper, M. J., G. T. Ankley, D. A. Cristol, L. A. Maryoung, P. D. Noyes, and K. E. Pinkerton. 2013. Interactions  
between chemical and climate stressors: A role for mechanistic toxicology in assessing climate change risks.

720 Horita, J., Y. Iwasa, and Y. Tachiki. 2021. Eco-evolutionary dynamics may show an irreversible regime shift,  
illustrated by salmonids facing climate change. *Theoretical Ecology* 14:345-357.

721 Horreo, J. L., A. M. Griffiths, G. Machado-Schiaffino, J. R. Stevens, and E. Garcia-Vazquez. 2019. Northern areas as  
refugia for temperate species under current climate warming: Atlantic salmon (*Salmo salar* L.) as a model in

722 Hotaling, S., A. A. Shah, K. L. McGowan, L. M. Tronstad, J. J. Giersch, D. S. Finn, H. A. Woods, M. E. Dillon, and J. L.  
Kelley. 2020. Mountain stoneflies may tolerate warming streams: Evidence from organismal physiology and gene

723 Hou, Z. S., H. S. Wen, J. F. Li, F. He, Y. Li, and X. Qi. 2020. Environmental hypoxia causes growth retardation,  
osteoclast differentiation and calcium dyshomeostasis in juvenile rainbow trout (*Oncorhynchus mykiss*). *Science*

724 Houde, A. L. S., A. Akbarzadeh, O. P. Gunther, S. R. Li, D. A. Patterson, A. P. Farrell, S. G. Hinch, and K. M. Miller.  
2019. Salmonid gene expression biomarkers indicative of physiological responses to changes in salinity and  
temperature, but not dissolved oxygen. *Journal of Experimental Biology* 222:15.

725 Hovel, R. A., K. L. Fresh, S. L. Schroder, A. H. Litt, and T. P. Quinn. 2019. A wide window of migration phenology  
captures inter-annual variability of favourable conditions: Results of a whole-lake experiment with juvenile Pacific

726 Howard, E. M., H. Frenzel, F. Kessouri, L. Renault, D. Bianchi, J. C. McWilliams, and C. Deutsch. 2020. Attributing  
Causes of Future Climate Change in the California Current System With Multimodel Downscaling. *Global*

727 Howell, D., A. M. Schueller, J. W. Bentley, A. Buchheister, D. Chagaris, M. Cieri, K. Drew, M. G. Lundy, D. Pedreschi,  
D. G. Reid, and H. Townsend. 2021. Combining Ecosystem and Single-Species Modeling to Provide Ecosystem-  
Based Fisheries Management Advice Within Current Management Systems. *Frontiers in Marine Science* 7.

728 Howell, P. J. 2018. Changes in native bull trout and non-native brook trout distributions in the upper Powder River  
basin after 20 years, relationships to water temperature and implications of climate change. *Ecology of*

729 Hrachowitz, M., C. Soulsby, C. Imholt, I. A. Malcolm, and D. Tetzlaff. 2010. Thermal regimes in a large upland  
salmon river: A simple model to identify the influence of landscape controls and climate change on maximum

730 Huang, B., C. Langpap, and R. M. Adams. 2011. Using instream water temperature forecasts for fisheries  
management: An application in the Pacific Northwest. *Journal of the American Water Resources Association*

731 Huber, E. R., and S. M. Carlson. 2020. Environmental correlates of fine-scale juvenile steelhead trout  
(*Oncorhynchus mykiss*) habitat use and movement patterns in an intermittent estuary during drought.

732 Huey, R. B., and J. G. Kingsolver. 2019. Climate Warming, Resource Availability, and the Metabolic Meltdown of  
Ectotherms. *American Naturalist* 194:E140-E150.

733 Hughes, J. S., F. Khan, S. A. Liss, R. A. Harnish, G. E. Johnson, B. B. Bellgraph, and K. R. Znotinas. 2021. Evaluation of  
Juvenile salmon passage and survival through a fish weir and other routes at Foster Dam, Oregon, USA. *Fisheries*

734 Hughes, R. M., and A. T. Herlihy. 2012. Patterns in catch per unit effort of native prey fish and alien piscivorous  
fish in 7 Pacific Northwest USA rivers. *Fisheries* 37:201-211.

735 Hughes, R. M., G. Boxall, A. T. Herlihy, J. Adams, and D. B. Young. 2020. A Complete Fisheries Inventory of the  
Chulitna River Basin, Lake Clark National Park and Preserve, Alaska: Example of a Minimally Disturbed Basin.

736 Hulbak, M., E. M. Hanssen, R. J. Lennox, A. G. V. Salvanes, B. Barlaup, N. Gharbi, T. O. Nilsen, and K. W. Vollset.  
2021. Validating timing of salmon smolt runs obtained by telemetry studies. *Fisheries Management and Ecology*

737 Humphries, P., A. King, N. McCasker, R. K. Kopf, R. Stoffels, B. Zampatti, and A. Price. 2020. Riverscape  
recruitment: a conceptual synthesis of drivers of fish recruitment in rivers. *Canadian Journal of Fisheries and*

738 Huntsman, B. M., and J. A. Falke. 2019. Main stem and off-channel habitat use by juvenile Chinook salmon in a sub-  
Arctic riverscape. *Freshwater Biology* 64:433-446.

739 Huntsman, B. M., J. A. Falke, J. W. Savereide, and K. E. Bennett. 2017. The role of density-dependent and -  
independent processes in spawning habitat selection by salmon in an Arctic riverscape. *Plos One* 12:e0177467.

- 740 Hurford, A., X. N. Wang, and X. Q. Zhao. 2019. Regional climate affects salmon lice dynamics, stage structure and management. *Proceedings of the Royal Society B-Biological Sciences* 286:9.
- 741 Hurst, T. P., E. R. Fernandez, and J. T. Mathis. 2013. Effects of ocean acidification on hatch size and larval growth of walleye pollock (*Theragra chalcogramma*). *Ices Journal of Marine Science* 70:812-822.
- 742 Hurst, T. P., S. B. Munch, and K. A. Lavelle. 2012. Thermal reaction norms for growth vary among cohorts of Pacific cod (*Gadus macrocephalus*). *Marine Biology* 159:2173-2183.
- 743 Hutchings, J. A., I. M. Cote, J. J. Dodson, I. A. Fleming, S. Jennings, N. J. Mantua, R. M. Peterman, B. E. Riddell, and A. J. Weaver. 2012. Climate change, fisheries, and aquaculture: Trends and consequences for Canadian marine
- 744 Hutchinson, I., and M. E. Hall. 2019. Chinook Salmon, Late Holocene Climate Change, and the Occupational History of Kettle Falls, a Columbia River Fishing Station. *Environmental Archaeology*:14.
- 745 Huusko, A., and P. Hyvarinen. 2012. Atlantic salmon abundance and size track climate regimes in the Baltic Sea. *Boreal Environment Research* 17:139-149.
- 746 Hvas, M., L. H. Stien, and F. Oppedal. 2021. The effect of fasting period on swimming performance, blood parameters and stress recovery in Atlantic salmon post smolts. *Comparative Biochemistry and Physiology a-*
- 747 Hvidsten, N. A., O. H. Diserud, A. J. Jensen, J. G. Jensas, B. O. Johnsen, and O. Ugedal. 2015. Water discharge affects Atlantic salmon *Salmo salar* smolt production: a 27 year study in the River Orkla, Norway. *Journal of Fish*
- 748 Hwan, J. L., A. Fernandez-Chacon, M. Buoro, and S. M. Carlson. 2018. Dry season survival of juvenile salmonids in an intermittent coastal stream. *Canadian Journal of Fisheries and Aquatic Sciences* 75:746-758.
- 749 Hyatt, K. D., D. J. McQueen, A. D. Ogden, R. Benson, and H. Wright. 2021. Age-Structured Interactions among Reintroduced Sockeye Salmon, Resident Kokanee, Invasive Mysids, and their Zooplankton Prey in Skaha Lake, British Columbia. *North American Journal of Fisheries Management* 41:1246-1273.
- 750 Ignatz, E. H., F. S. Zanuzzo, R. M. Sandrelli, K. A. Clow, M. L. Rise, and A. K. Gamperl. 2021. Phenotypic stress response does not influence the upper thermal tolerance of male Atlantic salmon (*Salmo salar*). *Journal of*
- 751 Imholt, C., C. Soulsby, I. A. Malcolm, and C. N. Gibbins. 2013. Influence of contrasting riparian forest cover on stream temperature dynamics in salmonid spawning and nursery streams. *Ecohydrology* 6:380-392.
- 752 Ineno, T., K. Tamaki, K. Yamada, R. Kodama, E. Tan, S. Kinoshita, K. Muto, T. Yada, S. Kitamura, S. Asakawa, and S. Watabe. 2019. Evaluation of the thermal tolerances of different strains of rainbow trout *Oncorhynchus mykiss* by measuring the effective time required for loss of equilibrium at an approximate upper lethal temperature.
- 753 Ineno, T., K. Yamada, K. Tamaki, R. Kodama, E. Tan, S. Kinoshita, K. Muto, T. Yada, S. Kitamura, S. Asakawa, and S. Watabe. 2020. Determination of thermal tolerance in rainbow trout *Oncorhynchus mykiss* based on effective time, and its reproducibility for a large number of fish. *Fisheries Science* 86:767-774.
- 754 IPCC, editor. 2012. Managing the Risks of Extreme Events and Disasters to Advance Climate Change Adaptation. A Special Report of Working Groups I and II of the Intergovernmental Panel on Climate Change. Cambridge University Press. Available at: <http://ipcc-wg2.gov/SREX/report/>, Cambridge, UK and New York, NY, USA.
- 755 Irvine, J. R., C. J. G. Michielsens, M. O'Brien, B. A. White, and M. Folkes. 2014. Increasing dominance of odd-year returning pink salmon. *Transactions of the American Fisheries Society* 143:939-956.
- 756 Isaak, D. J., and B. E. Rieman. 2013. Stream isotherm shifts from climate change and implications for distributions of ectothermic organisms. *Global Change Biology* 19:742-751.
- 757 Isaak, D. J., C. C. Muhlfeld, A. S. Todd, R. Al-Chokhachy, J. Roberts, J. L. Kershner, K. D. Fausch, and S. W. Hostetler. 2012. The past as prelude to the future for understanding 21st-century climate effects on Rocky Mountain trout.
- 758 Isaak, D. J., C. H. Luce, B. E. Rieman, D. E. Nagel, E. E. Peterson, D. L. Horan, S. Parkes, and G. L. Chandler. 2010. Effects of climate change and wildfire on stream temperatures and salmonid thermal habitat in a mountain river
- 759 Isaak, D. J., C. H. Luce, D. L. Horan, G. L. Chandler, S. P. Wollrab, and D. E. Nagel. 2018. Global warming of salmon and trout rivers in the northwestern U.S.: Road to ruin or path through purgatory? *Transactions of the American*
- 760 Isaak, D. J., S. Wollrab, D. Horan, and G. Chandler. 2012. Climate change effects on stream and river temperatures across the northwest US from 1980-2009 and implications for salmonid fishes. *Climatic Change* 113:499-524.
- 761 ISAB, I. S. A. B. 2021. Dam Bypass Selectivity Report: Review of Analyses of Juvenile Fish Size Selectivity in Dam Bypass Systems and Implications for Estimating and Interpreting Fish Survival.
- 762 Islam, M. J., A. Kunzmann, and M. J. Slater. 2021. Responses of aquaculture fish to climate change-induced extreme temperatures: A review. *Journal of the World Aquaculture Society*.
- 763 Itakura, H., M. H. P. O'Brien, and D. Secor. 2021. Tracking oxy-thermal habitat compression encountered by Chesapeake Bay striped bass through acoustic telemetry. *Ices Journal of Marine Science* 78:1049-1062.

- 764 Ivanina, A. V., and I. M. Sokolova. 2015. Interactive effects of metal pollution and ocean acidification on physiology of marine organisms. *Current Zoology* 61:653-668.
- 765 Jackson, F. L., R. J. Fryer, D. M. Hannah, and I. A. Malcolm. 2020. Predictions of national-scale river temperatures: A visualisation of complex space-time dynamics. *Hydrological Processes* 34:2823-2825.
- 766 Jackson, F. L., R. J. Fryer, D. M. Hannah, C. P. Millar, and I. A. Malcolm. 2018. A spatio-temporal statistical model of maximum daily river temperatures to inform the management of Scotland's Atlantic salmon rivers under climate change. *Science of the Total Environment* 612:1543-1558.
- 767 Jacob, C., T. McDaniels, and S. Hinch. 2010. Indigenous culture and adaptation to climate change: Sockeye salmon and the St'at'imc people. *Mitigation and Adaptation Strategies for Global Change* 15:859-876.
- 768 Jacobs, G. R., R. F. Thurow, J. M. Buffington, D. J. Isaak, and S. J. Wenger. 2021. Climate, Fire Regime, Geomorphology, and Conspecifics Influence the Spatial Distribution of Chinook Salmon Redds. *Transactions of the*
- 769 Jacobson, P., A. Gårdmark, and M. Huss. 2020. Population and size-specific distribution of Atlantic salmon *Salmo salar* in the Baltic Sea over five decades. *Journal of Fish Biology* 96:408-417.
- 770 Jacox, M. G., M. A. Alexander, S. Siedlecki, K. Chen, Y.-O. Kwon, S. Brodie, I. Ortiz, D. Tommasi, M. J. Widlansky, D. Barrie, A. Capotondi, W. Cheng, E. Di Lorenzo, C. Edwards, J. Fiechter, P. Fratantoni, E. L. Hazen, A. J. Hermann, A. Kumar, A. J. Miller, D. Pirhalla, M. Pozo Buil, S. Ray, S. C. Sheridan, A. Subramanian, P. Thompson, L. Thorne, H. Annamalai, K. Aydin, S. J. Bograd, R. B. Griffis, K. Kearney, H. Kim, A. Mariotti, M. Merrifield, and R. Rykaczewski. 2020. Seasonal-to-interannual prediction of North American coastal marine ecosystems: Forecast methods,
- 771 Jager, H. I., A. W. King, S. Gangrade, A. Haines, C. DeRolph, B. S. Naz, and M. Ashfaq. 2018. Will future climate change increase the risk of violating minimum flow and maximum temperature thresholds below dams in the
- 772 Jalbert, C. S., J. A. Falke, J. A. Lopez, K. J. Dunker, A. J. Sepulveda, and P. A. H. Westley. 2021. Vulnerability of Pacific salmon to invasion of northern pike (*Esox lucius*) in Southcentral Alaska. *Plos One* 16.
- 773 Janhunen, M., J. Piironen, and N. Peuhkuri. 2010. Parental effects on embryonic viability and growth in Arctic charr *Salvelinus alpinus* at two incubation temperatures. *Journal of Fish Biology* 76:2558-2570.
- 774 Jardim, E., M. Azevedo, J. Brodziak, E. N. Brooks, K. F. Johnson, N. Klibansky, C. P. Millar, C. Minto, I. Mosqueira, R. D. M. Nash, P. Vasilakopoulos, and B. K. Wells. 2021. Operationalizing ensemble models for scientific advice to
- 775 Jarque, S., E. Gallego, M. Bartrons, J. Catalan, J. O. Grimalt, and B. Pina. 2010. Altitudinal and thermal gradients of hepatic Cyp1A gene expression in natural populations of *Salmo trutta* from high mountain lakes and their correlation with organohalogen loads. *Environmental Pollution* 158:1392-1398.
- 776 Jarrett, K. W., E. Bell, E. A. Wilson, T. Dudley, and C. M. Geraghty. 2019. Using eDNA to validate predation on native *Oncorhynchus mykiss* by invasive Sacramento pikeminnow (*Ptychocheilus grandis*). *California Fish and*
- 777 Javaheri, A., M. Babbar-Sebens, J. Alexander, J. Bartholomew, and S. Hallett. 2018. Global sensitivity analysis of water age and temperature for informing salmonid disease management. *Journal of Hydrology* 561:89-97.
- 778 Jeffres, C. A., E. J. Holmes, T. R. Sommer, and J. V. E. Katz. 2020. Detrital food web contributes to aquatic ecosystem productivity and rapid salmon growth in a managed floodplain. *Plos One* 15.
- 779 Jeffrey, K. M., I. M. Côté, J. R. Irvine, and J. D. Reynolds. 2017. Changes in body size of Canadian Pacific salmon over six decades. *Canadian Journal of Fisheries and Aquatic Sciences* 74:191-201.
- 780 Jeffries, K. M., S. G. Hinch, E. G. Martins, T. D. Clark, A. G. Lotto, D. A. Patterson, S. J. Cooke, A. P. Farrell, and K. M. Miller. 2012. Sex and proximity to reproductive maturity influence the survival, final maturation, and blood physiology of Pacific salmon when exposed to high temperature during a simulated migration. *Physiological and*
- 781 Jeffries, K. M., S. G. Hinch, T. Sierocinski, P. Pavlidis, and K. M. Miller. 2014. Transcriptomic responses to high water temperature in two species of Pacific salmon. *Evolutionary Applications* 7:286-300.
- 782 Jeffries, K. M., S. G. Hinch, T. Sierocinski, T. D. Clark, E. J. Eliason, M. R. Donaldson, S. R. Li, P. Pavlidis, and K. M. Miller. 2012. Consequences of high temperatures and premature mortality on the transcriptome and blood physiology of wild adult sockeye salmon (*Oncorhynchus nerka*). *Ecology and Evolution* 2:1747-1764.
- 783 Jenkins, A. R., and E. R. Keeley. 2010. Bioenergetic assessment of habitat quality for stream-dwelling cutthroat trout (*Oncorhynchus clarkii bouvieri*) with implications for climate change and nutrient supplementation.
- 784 Jensen, A. J., B. Finstad, P. Fiske, T. Forseth, A. H. Rikardsen, and O. Ugedal. 2018. Relationship between marine growth and sea survival of two anadromous salmonid fish species. *Canadian Journal of Fisheries and Aquatic*
- 785 Jensen, A. J., P. Fiske, L. P. Hansen, B. O. Johnsen, K. A. Mork, and T. F. Naesje. 2011. Synchrony in marine growth among Atlantic salmon (*Salmo salar*) populations. *Canadian Journal of Fisheries and Aquatic Sciences* 68:444-457.
- 786 Jensen, A. J., S. Karlsson, P. Fiske, L. P. Hansen, G. M. Ostborg, and K. Hindar. 2014. Origin and life history of Atlantic salmon (*Salmo salar*) near their northernmost oceanic limit. *Canadian Journal of Fisheries and Aquatic*



- 787 Jepson, M. A., M. L. Keefer, G. P. Naughton, C. A. Peery, and B. J. Burke. 2010. Population composition, migration timing, and harvest of Columbia River Chinook salmon in late summer and fall. *North American Journal of*
- 788 Jespersen, H., G. Rasmussen, and S. Pedersen. 2021. Severity of summer drought as predictor for smolt recruitment in migratory brown trout (*Salmo trutta*). *Ecology of Freshwater Fish* 30:115-124.
- 789 Johannessen, S. C., and R. W. Macdonald. 2009. Effects of local and global change on an inland sea: The Strait of Georgia, British Columbia, Canada. *Climate Research* 40:1-21.
- 790 Johansen, J. L., O. Akanyeti, and J. C. Liao. 2020. Oxygen consumption of drift-feeding rainbow trout: the energetic tradeoff between locomotion and feeding in flow. *Journal of Experimental Biology* 223.
- 791 Johns, M. E., P. Warzybok, J. Jahncke, P. Doak, M. Lindberg, and G. A. Breed. 2022. Episodes of high recruitment buffer against climate-driven mass mortality events in a North Pacific seabird population. *Journal of Animal*
- 792 Johnson-Colegrove, A., L. Ciannelli, and R. D. Brodeur. 2015. Ichthyoplankton distribution and abundance in relation to nearshore dissolved oxygen levels and other environmental variables within the Northern California
- 793 Johnson, A. C., J. R. Bellmore, S. Haught, and R. Medel. 2019. Quantifying the Monetary Value of Alaska National Forests to Commercial Pacific Salmon Fisheries. *North American Journal of Fisheries Management* 39:1119-1131.
- 794 Johnson, B. M., B. M. Kemp, and G. H. Thorgaard. 2018. Increased mitochondrial DNA diversity in ancient Columbia River basin Chinook salmon *Oncorhynchus tshawytscha*. *Plos One* 13:e0190059.
- 795 Johnson, J. R., J. Baumsteiger, J. Zydlewski, J. M. Hudson, and W. Ardren. 2010. Evidence of panmixia between sympatric life history forms of coastal cutthroat trout in two Lower Columbia River tributaries. *North American*
- 796 Johnson, M. A., and T. A. Friesen. 2013. Age at maturity, fork length, and sex ratio of Upper Willamette River Hatchery spring Chinook salmon. *North American Journal of Fisheries Management* 33:318-328.
- 797 Johnson, S. P., and D. E. Schindler. 2012. Four decades of foraging history: Stock-specific variation in the carbon and nitrogen stable isotope signatures of Alaskan sockeye salmon. *Marine Ecology-Progress Series* 460:155-167.
- 798 Johnson, Z. C., B. G. Johnson, M. A. Briggs, C. D. Snyder, N. P. Hitt, and W. D. Devine. 2021. Heed the data gap: Guidelines for using incomplete datasets in annual stream temperature analyses. *Ecological Indicators* 122.
- 799 Johnston, E. F., and T. E. Gillis. 2020. Short-term cyclical stretch phosphorylates p38 and ERK1/2 MAPKs in cultured fibroblasts from the hearts of rainbow trout *Oncorhynchus mykiss*. *Biology Open* 9.
- 800 Jokinen, I. E., H. M. Salo, E. Markkula, K. Rikalainen, M. T. Arts, and H. I. Browman. 2011. Additive effects of enhanced ambient ultraviolet B radiation and increased temperature on immune function, growth and physiological condition of juvenile (parr) Atlantic Salmon, *Salmo salar*. *Fish & Shellfish Immunology* 30:102-108.
- 801 Jones, C. E., S. G. Leibowitz, K. A. Sawicz, R. L. Comeleo, L. E. Stratton, P. E. Morefield, and C. P. Weaver. 2021. Using hydrologic landscape classification and climatic time series to assess hydrologic vulnerability of the western US to climate. *Hydrology and Earth System Sciences* 25:3179-3206.
- 802 Jones, L. A., E. R. Schoen, R. Shaftel, C. J. Cunningham, S. Mauger, D. J. Rinella, and A. St. Saviour. 2020. Watershed-scale climate influences productivity of Chinook salmon populations across southcentral Alaska. *Global Change*
- 803 Jorgensen, J. C., C. Nicol, C. Fogel, and T. J. Beechie. 2021. Identifying the potential of anadromous salmonid habitat restoration with life cycle models. *Plos One* 16:e0256792.
- 804 Juttner, I., M. G. Kelly, S. Evans, H. Probert, A. Orange, L. Ector, and S. Marsh-Smith. 2021. Assessing the impact of land use and liming on stream quality, diatom assemblages and juvenile salmon in Wales, United Kingdom.
- 805 Kaeding, L. R. 2020. New climate regime started and further shaped the historic Yellowstone Lake cutthroat trout population decline commonly attributed entirely to nonnative lake trout predation. *Aquatic Ecology* 54:641-652.
- 806 Kallio-Nyberg, I., I. Saloniemi, and M. L. Koljonen. 2020. Increasing temperature associated with increasing grilse proportion and smaller grilse size of Atlantic salmon. *Journal of Applied Ichthyology* 36:288-297.
- 807 Kallo, K., H. Baktoft, N. Jepsen, and K. Aarestrup. 2020. Great cormorant (*Phalacrocorax carbo sinensis*) predation on juvenile down-migrating trout (*Salmo trutta*) in a lowland stream. *Ices Journal of Marine Science* 77:721-729.
- 808 Kaltenberg, A. M., R. L. Emmett, and K. J. Benoit-Bird. 2010. Timing of forage fish seasonal appearance in the Columbia River plume and link to ocean conditions. *Marine Ecology-Progress Series* 419:171-184.
- 809 Kanerva, M., M. Kiljunen, J. Torniainen, M. Nikinmaa, J. Dutz, and K. A. Vuori. 2020. Environmentally driven changes in Baltic salmon oxidative status during marine migration. *Science of the Total Environment* 742.
- 810 Kannry, S. H., S. M. O'Rourke, S. J. Kelson, and M. R. Miller. 2020. On the Ecology and Distribution of Steelhead (*Oncorhynchus mykiss*) in California's Eel River. *Journal of Heredity* 111:548-563.
- 811 Kao, Y. C., C. P. Madenjian, D. B. Bunnell, B. M. Lofgren, and M. Perroud. 2015. Temperature effects induced by climate change on the growth and consumption by salmonines in Lakes Michigan and Huron. *Environmental*

- 812 Kaplan, I. C., T. B. Francis, A. E. Punt, L. E. Koehn, E. Curchitser, F. Hurtado-Ferro, K. F. Johnson, S. E. Lluch-Cota, W. J. Sydeman, T. E. Essington, N. Taylor, K. Holsman, A. D. MacCall, and P. S. Levin. 2018. A multi-model approach to understanding the role of Pacific sardine in the California Current food web. *Marine Ecology Progress Series* 617-629.
- 813 Kardos, M., and G. Luikart. 2021. The Genetic Architecture of Fitness Drives Population Viability during Rapid Environmental Change. *The American Naturalist* 197:511-525.
- 814 Kardos, M., E. E. Armstrong, S. W. Fitzpatrick, S. Hauser, P. W. Hedrick, J. M. Miller, D. A. Tallmon, and W. C. Funk. 2021. The crucial role of genome-wide genetic variation in conservation. *Proceedings of the National Academy of Sciences* 118:1-10.
- 815 Kargenberg, E., E. B. Thorstad, R. Jarvekul, O. T. Sandlund, E. Saadre, F. Okland, M. Thalfeldt, and M. Tambets. 2020. Behaviour and mortality of downstream migrating Atlantic salmon smolts at a small power station with multiple migration routes. *Fisheries Management and Ecology* 27:32-40.
- 816 Katz, J., P. B. Moyle, R. M. Quinones, J. Israel, and S. Purdy. 2013. Impending extinction of salmon, steelhead, and trout (Salmonidae) in California. *Environmental Biology of Fishes* 96:1169-1186.
- 817 Kavanagh, K. D., T. O. Haugen, F. Gregersen, J. Jernvall, and L. A. Vollestad. 2010. Contemporary temperature-driven divergence in a Nordic freshwater fish under conditions commonly thought to hinder adaptation. *Bmc Evolutionary Biology* 10:Available at: <http://www.biomedcentral.com/1471-2148/1410/1350>.
- 818 Kawaguchi, S., H. Kurihara, R. King, L. Hale, T. Berli, J. P. Robinson, A. Ishida, M. Wakita, P. Virtue, S. Nicol, and A. Ishimatsu. 2011. Will krill fare well under Southern Ocean acidification? *Biol Lett* 7:288-291.
- 819 Kaylor, M. J., and D. R. Warren. 2017. Linking riparian shade and the legacies of forest management to fish and vertebrate biomass in forested streams. *Ecosphere* 8.
- 820 Kaylor, M. J., B. J. VerWey, A. Cortes, and D. R. Warren. 2019. Drought impacts to trout and salamanders in cool, forested headwater ecosystems in the western Cascade Mountains, OR. *Hydrobiologia* 833:65-80.
- 821 Kaylor, M. J., C. Justice, J. B. Armstrong, B. A. Staton, L. A. Burns, E. Sedell, and S. M. White. 2021. Temperature, emergence phenology, and consumption drive seasonal shifts in fish growth and production across riverscapes. *J*
- 822 Kazyak, D., B. H. Letcher, J. Zydlewski, and M. J. O'Donnell. 2014. Growth variability of brook charr (*Salvelinus fontinalis*) in coastal maine. *Ecology of Freshwater Fish* 23:516-526.
- 823 Kearney, K. A. A., S. J. J. Bograd, E. Drenkard, F. A. A. Gomez, M. Haltuch, A. J. J. Hermann, M. G. G. Jacox, I. C. C. Kaplan, S. Koenigstein, J. Y. Y. Luo, M. Masi, B. Muhling, M. P. Buil, and P. A. A. Woodworth-Jefcoats. 2021. Using Global-Scale Earth System Models for Regional Fisheries Applications. *Frontiers in Marine Science* 8.
- 824 Keefer, M. L., and C. C. Caudill. 2016. Estimating thermal exposure of adult summer steelhead and fall Chinook salmon migrating in a warm impounded river. *Ecology of Freshwater Fish* 25:599-611.
- 825 Keefer, M. L., G. P. Naughton, T. S. Clabough, M. J. Knoff, T. J. Blubaugh, M. R. Morasch, P. G. Green, and C. C. Caudill. 2020. Tissue toxicants and prespawn mortality in Willamette River Chinook salmon. *Environmental Biology*
- 826 Keefer, M. L., G. Taylor, A., D. F. Garletts, G. A. Gauthier, T. M. Pierce, and C. C. Caudill. 2010. Prespawn mortality in adult spring Chinook salmon outplanted above barrier dams. *Ecology of Freshwater Fish* 19:361-372.
- 827 Keefer, M. L., M. A. Jepson, G. P. Naughton, T. J. Blubaugh, T. S. Clabough, and C. C. Caudill. 2017. Condition-dependent en route migration mortality of adult Chinook salmon in the Willamette River main stem. *North*
- 828 Keefer, M. L., T. S. Clabough, M. A. Jepson, E. L. Johnson, C. A. Peery, and C. C. Caudill. 2018. Thermal exposure of adult Chinook salmon and steelhead: Diverse behavioral strategies in a large and warming river system. *Plos One*
- 829 Keefer, M. L., T. S. Clabough, M. A. Jepson, G. P. Naughton, T. J. Blubaugh, D. C. Joosten, and C. C. Caudill. 2015. Thermal exposure of adult Chinook salmon in the Willamette River basin. *Journal of Thermal Biology* 48:11-20.
- 830 Keefer, M. L., T. S. Clabough, M. A. Jepson, T. Bowerman, and C. C. Caudill. 2019. Temperature and depth profiles of Chinook salmon and the energetic costs of their long-distance homing migrations. *Journal of Thermal Biology*
- 831 Keen, A. N., and A. K. Gamperl. 2012. Blood oxygenation and cardiorespiratory function in steelhead trout (*Oncorhynchus mykiss*) challenged with an acute temperature increase and zatebradine-induced bradycardia.
- 832 Keen, A. N., J. J. Mackrill, P. Gardner, and H. A. Shiels. 2021. Compliance of the fish outflow tract is altered by thermal acclimation through connective tissue remodelling. *Journal of the Royal Society Interface* 18.
- 833 Kelly, M. W., and G. E. Hofmann. 2013. Adaptation and the physiology of ocean acidification. *Functional Ecology*
- 834 Kelly, M. W., J. L. Padilla-Gamino, and G. E. Hofmann. 2013. Natural variation and the capacity to adapt to ocean acidification in the keystone sea urchin *Strongylocentrotus purpuratus*. *Global Change Biology* 19:2536-2546.
- 835 Kelly, S., T. N. Moore, E. de Eyto, M. Dillane, C. Goulon, J. Guillard, E. Lasne, P. McGinnity, R. Poole, I. J. Winfield, R. I. Woolway, and E. Jennings. 2020. Warming winters threaten peripheral Arctic charr populations of Europe.
- 836 Kelson, S. J., and S. M. Carlson. 2019. Do precipitation extremes drive growth and migration timing of a Pacific salmonid fish in Mediterranean-climate streams? *Ecosphere* 10:17.

837 Kelson, S. J., M. R. Miller, T. Q. Thompson, S. M. O'Rourke, and S. M. Carlson. 2020. Temporal dynamics of migration-linked genetic variation are driven by streamflows and riverscape permeability. *Molecular Ecology*

838 Kendall, N. W., B. W. Nelson, and J. Losee. 2020. Density-dependent marine survival of hatchery-origin Chinook salmon may be associated with pink salmon. *Ecosphere* 11.

839 Kennedy, L. A., F. Juanes, and R. El-Sabaawi. 2018. Eelgrass as valuable nearshore foraging habitat for juvenile Pacific Salmon in the early marine period. *Marine and Coastal Fisheries* 10:190-203.

840 Kennedy, R. J., and W. W. Crozier. 2010. Evidence of changing migratory patterns of wild Atlantic salmon *Salmo salar* smolts in the River Bush, Northern Ireland, and possible associations with climate change. *Journal of Fish*

841 Khangaonkar, T., A. Nugraha, L. Premathilake, J. Keister, and A. Borde. 2021. Projections of algae, eelgrass, and zooplankton ecological interactions in the inner Salish Sea - for future climate, and altered oceanic states.

842 Khangaonkar, T., A. Nugraha, S. K. Yun, L. Premathilake, J. E. Keister, and J. Bos. 2021. Propagation of the 2014-2016 Northeast Pacific Marine Heatwave Through the Salish Sea. *Frontiers in Marine Science* 8.

843 Khangaonkar, T., A. Nugraha, W. W. Xu, and K. Balaguru. 2019. Salish Sea Response to Global Climate Change, Sea Level Rise, and Future Nutrient Loads. *Journal of Geophysical Research-Oceans* 124:3876-3904.

844 Kilduff, D. P., E. Di Lorenzo, L. W. Botsford, and S. L. H. Teo. 2015. Changing central Pacific El Ninos reduce stability of North American salmon survival rates. *Proceedings of the National Academy of Sciences of the United States of*

845 Kilduff, D. P., L. W. Botsford, and S. L. H. Teo. 2014. Spatial and temporal covariability in early ocean survival of Chinook salmon (*Oncorhynchus tshawytscha*) along the west coast of North America. *Ices Journal of Marine*

846 King, R. A., B. Stockley, and J. R. Stevens. 2020. Small coastal streams-Critical reservoirs of genetic diversity for trout (*Salmo trutta* L.) in the face of increasing anthropogenic stressors. *Ecology and Evolution* 10:5651-5669.

847 Kirillova, E. A., P. I. Kirillov, A. M. Malyutina, K. V. Kuzishchin, M. A. Gruzdeva, and D. S. Pavlov. 2021. Resident Coho Salmon *Oncorhynchus kisutch* in the Asian Part of Range. Revisiting the Freshwater Component in the

848 Kishi, M. J., M. Kaeriyama, H. Ueno, and Y. Kamezawa. 2010. The effect of climate change on the growth of Japanese chum salmon (*Oncorhynchus keta*) using a bioenergetics model coupled with a three-dimensional lower trophic ecosystem model (NEMURO). *Deep-Sea Research Part II-Topical Studies in Oceanography* 57:1257-1265.

849 Kitada, S., and H. Kishino. 2021. Population structure of chum salmon and selection on the markers collected for stock identification. *Ecology and Evolution* 11:13972-13985.

850 Klaiman, J. M., A. J. Fenna, H. A. Shiels, J. Macri, and T. E. Gillis. 2011. Cardiac remodeling in fish: Strategies to maintain heart function during temperature change. *Plos One* 6:e24464.

851 Klaminder, J., M. Jonsson, J. Leander, J. Fahlman, T. Brodin, J. Fick, and G. Hellstrom. 2019. Less anxious salmon smolt become easy prey during downstream migration. *Science of the Total Environment* 687:488-493.

852 Kocan, R., P. Hershberger, G. Sanders, and J. Winton. 2009. Effects of temperature on disease progression and swimming stamina in Ichthyophonus-infected rainbow trout, *Oncorhynchus mykiss* (Walbaum). *Journal of Fish*

853 Kock, T. J., J. W. Ferguson, M. L. Keefer, and C. B. Schreck. 2021. Review of trap-and-haul for managing Pacific salmonids (*Oncorhynchus* spp.) in impounded river systems. *Reviews in Fish Biology and Fisheries* 31:53-94.

854 Kock, T. J., S. D. Evans, B. P. Saluskin, A. P. Matala, R. Visser, M. V. Johnston, P. F. Galbreath, and A. C. Pope. 2021. Adult Sockeye Salmon Responses to Transplanting Upstream of an Impassable Dam. *North American Journal of*

855 Kock, T. J., T. L. Liedtke, D. W. Rondorf, J. D. Serl, M. Kohn, and K. A. Bumbaco. 2012. Elevated streamflows increase dam passage by juvenile coho salmon during winter: Implications of climate change in the Pacific

856 Kodama, M., J. J. Hard, and K. A. Naish. 2012. Temporal variation in selection on body length and date of return in a wild population of coho salmon, *Oncorhynchus kisutch*. *Bmc Evolutionary Biology* 12.

857 Koel, T. M., B. L. Kerans, S. C. Barras, K. C. Hanson, and J. S. Wood. 2010. Avian piscivores as vectors for *Myxobolus cerebralis* in the Greater Yellowstone Ecosystem. *Transactions of the American Fisheries Society* 139:976-988.

858 Koenigstein, S., F. C. Mark, S. Gossling-Reisemann, H. Reuter, and H. O. Poertner. 2016. Modelling climate change impacts on marine fish populations: process-based integration of ocean warming, acidification and other

859 Kohan, M. L., F. J. Mueter, J. A. Orsi, and M. V. McPhee. 2019. Variation in size, condition, and abundance of juvenile chum salmon (*Oncorhynchus keta*) in relation to marine factors in Southeast Alaska. *Deep-Sea Research*

860 Koontz, E. D., E. A. Steel, and J. D. Olden. 2018. Stream thermal responses to wildfire in the Pacific Northwest.

861 Korman, J., M. D. Yard, M. C. Dzul, C. B. Yackulic, M. J. Dodrill, B. R. Deemer, and T. A. Kennedy. 2021. Changes in prey, turbidity, and competition reduce somatic growth and cause the collapse of a fish population. *Ecological*

862 Koubrak, O., and D. L. VanderZwaag. 2020. Are transboundary fisheries management arrangements in the Northwest Atlantic and North Pacific seaworthy in a changing ocean? *Ecology and Society* 25.

- 863 Kovach, R. P., A. J. Gharrett, and D. A. Tallmon. 2012. Genetic change for earlier migration timing in a pink salmon population. *Proceedings of the Royal Society B-Biological Sciences* 279:3870-3878.
- 864 Kovach, R. P., A. J. Gharrett, and D. A. Tallmon. 2013. Temporal patterns of genetic variation in a salmon population undergoing rapid change in migration timing. *Evolutionary Applications* 6:795-807.
- 865 Kovach, R. P., C. C. Muhlfeld, A. A. Wade, B. K. Hand, D. C. Whited, P. W. DeHaan, R. Al-Chokhachy, and G. Luikart. 2015. Genetic diversity is related to climatic variation and vulnerability in threatened bull trout. *Global Change*
- 866 Kovach, R. P., C. C. Muhlfeld, R. Al-Chokhachy, J. V. Ojala, and E. K. Archer. 2019. Effects of land use on summer thermal regimes in critical salmonid habitats of the Pacific Northwest. *Canadian Journal of Fisheries and Aquatic*
- 867 Kovach, R. P., J. E. Joyce, J. D. Echave, M. S. Lindberg, and D. A. Tallmon. 2013. Earlier migration timing, decreasing phenotypic variation, and biocomplexity in multiple salmonid species. *Plos One* 8:e53807.
- 868 Kovach, R. P., J. E. Joyce, S. C. Vulstek, E. M. Barrientos, and D. A. Tallmon. 2014. Variable effects of climate and density on the juvenile ecology of two salmonids in an Alaskan lake. *Canadian Journal of Fisheries and Aquatic*
- 869 Kovach, R. P., S. C. Ellison, S. Pyare, and D. A. Tallmon. 2015. Temporal patterns in adult salmon migration timing across southeast Alaska. *Global Change Biology* 21:1821-1833.
- 870 Kovach, R., B. Jonsson, N. Jonsson, I. Arismendi, J. E. Williams, J. L. Kershner, R. Al-Chokhachy, B. Letcher, and C. C. Muhlfeld. 2019. Climate Change and the Future of Trout and Char.
- 871 Kraft, M., D. E. Rosenberg, and S. E. Null. 2019. Prioritizing Stream Barrier Removal to Maximize Connected Aquatic Habitat and Minimize Water Scarcity. *Journal of the American Water Resources Association* 55:382-400.
- 872 Kraskura, K., E. A. Hardison, A. G. Little, T. Dressler, T. S. Prystay, B. Hendriks, A. P. Farrell, S. J. Cooke, D. A. Patterson, S. G. Hinch, and E. J. Eliason. 2021. Sex-specific differences in swimming, aerobic metabolism and recovery from exercise in adult coho salmon (*Oncorhynchus kisutch*) across ecologically relevant temperatures.
- 873 Krimmer, A. N., A. J. Paul, A. Hontela, and J. B. Rasmussen. 2011. Behavioural and physiological responses of brook trout *Salvelinus fontinalis* to midwinter flow reduction in a small ice-free mountain stream. *Journal of Fish Biology*
- 874 Krkosek, M. 2010. Sea lice and salmon in Pacific Canada: Ecology and policy. *Frontiers in Ecology and the*
- 875 Kroeker, K. J., R. L. Kordas, R. Crim, I. E. Hendriks, L. Ramajo, G. S. Singh, C. M. Duarte, and J. P. Gattuso. 2013. Impacts of ocean acidification on marine organisms: Quantifying sensitivities and interaction with warming. *Global*
- 876 Kroeker, K. J., R. L. Kordas, R. N. Crim, and G. G. Singh. 2010. Meta-analysis reveals negative yet variable effects of ocean acidification on marine organisms. *Ecology Letters* 13:1419-1434.
- 877 Krosby, M., D. M. Theobald, R. Norheim, and B. H. McRae. 2018. Identifying riparian climate corridors to inform climate adaptation planning. *Plos One* 13:e0205156.
- 878 Krueger, K. L., D. L. Bottom, W. G. Hood, G. E. Johnson, K. K. Jones, and R. M. Thom. 2017. An expert panel process to evaluate habitat restoration actions in the Columbia River estuary. *J Environ Manage* 188:337-350.
- 879 Kuczynski, L., M. Chevalier, P. Laffaille, M. Legrand, and G. Grenouillet. 2017. Indirect effect of temperature on fish population abundances through phenological changes. *Plos One* 12:e0175735.
- 880 Kuehne, L. M., J. D. Olden, and J. J. Duda. 2012. Costs of living for juvenile Chinook salmon (*Oncorhynchus tshawytscha*) in an increasingly warming and invaded world. *Canadian Journal of Fisheries and Aquatic Sciences*
- 881 Kurihara, H. 2008. Effects of CO<sub>2</sub>-driven ocean acidification on the early developmental stages of invertebrates. *Marine Ecology-Progress Series* 373:275-284.
- 882 Kurihara, H., and A. Ishimatsu. 2008. Effects of high CO<sub>2</sub> seawater on the copepod (*Acartia tsuensis*) through all life stages and subsequent generations. *Marine Pollution Bulletin* 56:1086-1090.
- 883 Kurihara, H., S. Shimode, and Y. Shirayama. 2004. Effects of raised CO<sub>2</sub> concentration on the egg production rate and early development of two marine copepods (*Acartia steueri* and *Acartia erythraea*). *Marine Pollution Bulletin*
- 884 Kurihara, H., S. Shimode, and Y. Shirayama. 2004. Sub-lethal effects of elevated concentration of CO<sub>2</sub> on planktonic copepods and sea urchins. *Journal of Oceanography* 60:743-750.
- 885 Kurylyk, B. L., K. T. B. MacQuarrie, T. Linnansaari, R. A. Cunjak, and R. A. Curry. 2014. Preserving, augmenting, and creating cold-water thermal refugia in rivers: concepts derived from research on the Miramichi River, New
- 886 Kuzishchin, K. V., M. A. Gruzdeva, A. V. Semenova, and D. S. Pavlov. 2020. The Spring-Run Ecotype of the Steelhead Trout *Parasalmo* (*Oncorhynchus*) *mykiss* (Walbaum, 1792) (Salmonidae, Salmoniformes) in the
- 887 Kuzishschin, K. V., A. V. Semenova, M. A. Gruzdeva, and D. S. Pavlov. 2021. Regularities of Formation of Diversity of Life Strategy and Genetic Variability of The Kamchatka Rainbow Trout *Parasalmo mykiss* in a Local Population.
- 888 Labonne, J., M. Vignon, E. Prevost, F. Lecomte, J. J. Dodson, R. Kaeuffer, J. C. Aymes, M. Jarry, P. Gaudin, P. Davaine, and E. Beall. 2013. Invasion dynamics of a fish-free landscape by brown trout (*Salmo trutta*). *Plos One*

- 889 Lacoue-Labarthe, T., E. Reveillac, F. Oberhansli, J. L. Teyssie, R. Jeffree, and J. P. Gattuso. 2011. Effects of ocean  
acidification on trace element accumulation in the early-life stages of squid *Loligo vulgaris*. *Aquat Toxicol* 105:166-
- 890 Lacroix, G. L. 2013. Migratory strategies of Atlantic salmon (*Salmo salar*) postsmolts and implications for marine  
survival of endangered populations. *Canadian Journal of Fisheries and Aquatic Sciences* 70:32-48.
- 891 Lacroix, G. L., and M. Bradford. 2013. Population-specific ranges of oceanic migration for adult Atlantic salmon  
(*Salmo salar*) documented using pop-up satellite archival tags. *Canadian Journal of Fisheries and Aquatic Sciences*
- 892 Laetz, C. A., D. H. Baldwin, V. R. Hebert, J. D. Stark, and N. L. Scholz. 2014. Elevated temperatures increase the  
toxicity of pesticide mixtures to juvenile coho salmon. *Aquatic Toxicology* 146:38-44.
- 893 Lahnsteiner, F., and M. Kletzl. 2012. The effect of water temperature on gamete maturation and gamete quality in  
the European grayling (*Thymalus thymallus*) based on experimental data and on data from wild populations. *Fish*
- 894 Lahnsteiner, F., and N. Mansour. 2012. The effect of temperature on sperm motility and enzymatic activity in  
brown trout *Salmo trutta*, burbot *Lota lota* and grayling *Thymallus thymallus*. *Journal of Fish Biology* 81:197-209.
- 895 Laitinen, V., V. Dakos, and L. Lahti. 2021. Probabilistic early warning signals. *Ecology and Evolution* 11:14101-
- 896 LaMere, K., S. Mantyniemi, and P. Haapasaari. 2020. The effects of climate change on Baltic salmon: Framing the  
problem in collaboration with expert stakeholders. *Science of the Total Environment* 738.
- 897 Landis, W. G., V. R. Chu, S. E. Graham, M. J. Harris, A. J. Markiewicz, C. J. Mitchell, K. E. von Stackelberg, and J. D.  
Stark. 2020. Integration of Chlorpyrifos Acetylcholinesterase Inhibition, Water Temperature, and Dissolved  
Oxygen Concentration into a Regional Scale Multiple Stressor Risk Assessment Estimating Risk to Chinook Salmon.
- 898 Lane, B., J. P. Ortiz-Partida, and S. Sandoval-Solis. 2020. Extending water resources performance metrics to river  
ecosystems. *Ecological Indicators* 114.
- 899 Langshaw, R. B., P. J. Graf, and T. N. Pearsons. 2018. Hydropower and high productivity in the Hanford Reach: A  
synthesis of how flow management may benefit fall Chinook salmon in the Columbia River, USA. Wiley
- 900 Laramie, M. B., D. S. Pilliod, and C. S. Goldberg. 2015. Characterizing the distribution of an endangered salmonid  
using environmental DNA analysis. *Biological Conservation* 183:29-37.
- 901 Larios-Lopez, J. E., C. A. Gonzalez, M. Galiana-Garcia, and J. M. T. de Figueroa. 2021. Driving factors of  
synchronous dynamics in brown trout populations at the rear edge of their native distribution. *Ecology of*
- 902 Larios-Lopez, J. E., J. M. T. de Figueroa, C. Alonso-Gonzalez, and B. N. Sanz. 2015. Distribution of brown trout  
(*Salmo trutta* Linnaeus, 1758) (Teleostei: Salmonidae) in its southwesternmost European limit: possible causes.
- 903 Larocque, S. M., T. B. Johnson, and A. T. Fisk. 2020. Survival and migration patterns of naturally and hatchery-  
reared Atlantic salmon (*Salmo salar*) smolts in a Lake Ontario tributary using acoustic telemetry. *Freshwater*
- 904 Larrieu, K. G., and G. B. Pasternack. 2021. Automated analysis of lateral river connectivity and fish stranding risks.  
Part 2: Juvenile Chinook salmon stranding at a river rehabilitation site. *Ecohydrology* 14.
- 905 Larsen, L. G., and C. Woelfle-Erskine. 2018. Groundwater is key to salmonid persistence and recruitment in  
intermittent mediterranean-climate streams. *Water Resources Research* 54:8909-8930.
- 906 Larson, W. A., J. E. Seeb, T. H. Dann, D. E. Schindler, and L. W. Seeb. 2014. Signals of heterogeneous selection at an  
MHC locus in geographically proximate ecotypes of sockeye salmon. *Molecular Ecology* 23:5448-5461.
- 907 Lauringson, M., I. Nousiainen, S. Kahar, O. Burimski, R. Gross, T. Kaart, and A. Vasemagi. 2021. Climate change-  
driven disease in sympatric hosts: Temporal dynamics of parasite burden and proliferative kidney disease in wild  
brown trout and Atlantic salmon. *Journal of Fish Diseases* 44:689-699.
- 908 Lavery, J. M., and R. A. Cunjak. 2019. The influence of abiotic incubation conditions on the winter mortality of wild  
salmonid embryos. *Freshwater Biology* 64:1098-1113.
- 909 Lawrence, D. J., B. Stewart-Koster, J. D. Olden, A. S. Ruesch, C. E. Torgersen, J. J. Lawler, D. P. Butcher, and J. K.  
Crown. 2014. The interactive effects of climate change, riparian management, and a nonnative predator on
- 910 Lawrence, D. J., D. A. Beauchamp, and J. D. Olden. 2015. Life-stage-specific physiology defines invasion extent of a  
riverine fish. *Journal of Animal Ecology* 84:879-888.
- 911 Lawrence, D. J., J. D. Olden, and C. E. Torgersen. 2012. Spatiotemporal patterns and habitat associations of  
smallmouth bass (*Micropterus dolomieu*) invading salmon-rearing habitat. *Freshwater Biology* 57:1929-1946.
- 912 Layton, K. K. S., P. V. R. Snelgrove, J. B. Dempson, T. Kess, S. J. Lehnert, P. Bentzen, S. J. Duffy, A. M. Messmer, R. R.  
E. Stanley, C. DiBacco, S. J. Salisbury, D. E. Ruzzante, C. M. Nugent, M. M. Ferguson, J. S. Leong, B. F. Koop, and I. R.  
Bradbury. 2021. Genomic evidence of past and future climate-linked loss in a migratory Arctic fish. *Nature Climate*
- 913 Leach, J. A., and D. Moore. 2017. Insights on stream temperature processes through development of a coupled  
hydrologic and stream temperature model for forested coastal headwater catchments. *Hydrological Processes*

914 Leach, J. A., R. D. Moore, S. G. Hinch, and T. Gomi. 2012. Estimation of forest harvesting-induced stream  
temperature changes and bioenergetic consequences for cutthroat trout in a coastal stream in British Columbia,

915 Leblanc, C. A., K. Horri, S. Skulason, and D. Benhaim. 2019. Subtle temperature increase can interact with  
individual size and social context in shaping phenotypic traits of a coldwater fish. *Plos One* 14:21.

916 LeBlanc, S., E. Hoglund, K. M. Gilmour, and S. Currie. 2012. Hormonal modulation of the heat shock response:  
Insights from fish with divergent cortisol stress responses. *American Journal of Physiology-Regulatory Integrative*

917 Lecomte, J. B., and C. Laplanche. 2012. A length-based hierarchical model of brown trout (*Salmo trutta fario*)  
growth and production. *Biometrical Journal* 54:108-126.

918 Leduc, A., P. L. Munday, G. E. Brown, and M. C. O. Ferrari. 2013. Effects of acidification on olfactory-mediated  
behaviour in freshwater and marine ecosystems: A synthesis. *Philosophical Transactions of the Royal Society B-*

919 Lee, H. J., S. Y. Lee, and Y. K. Kim. 2021. Molecular characterization of transient receptor potential vanilloid 4  
(TRPV4) gene transcript variant mRNA of chum salmon *Oncorhynchus keta* in response to salinity or temperature

920 Lee, S. Y., A. H. Fullerton, N. Sun, and C. E. Torgersen. 2020. Projecting spatiotemporally explicit effects of climate  
change on stream temperature: A model comparison and implications for coldwater fishes. *Journal of Hydrology*

921 Lee, W. S., P. Monaghan, and N. B. Metcalfe. 2012. The pattern of early growth trajectories affects adult breeding

922 Lefevre, M. A., M. J. W. Stokesbury, F. G. Whoriskey, and M. J. Dadswell. 2013. Migration of Atlantic salmon  
smolts and post-smolts in the Riviere Saint-Jean, QC north shore from riverine to marine ecosystems.

923 Lefevre, S., T. Wang, and D. J. McKenzie. 2021. The role of mechanistic physiology in investigating impacts of  
global warming on fishes. *J Exp Biol* 224.

924 Lehnert, S. J., S. M. Baillie, J. MacMillan, I. G. Paterson, C. F. Buhariwalla, I. R. Bradbury, and P. Bentzen. 2020.  
Multiple decades of stocking has resulted in limited hatchery introgression in wild brook trout (*Salvelinus*  
*fontinalis*) populations of Nova Scotia. *Evolutionary Applications* 13:1069-1089.

925 Lehnert, S. J., T. Kess, P. Bentzen, M. Clement, and I. R. Bradbury. 2020. Divergent and linked selection shape  
patterns of genomic differentiation between European and North American Atlantic salmon (*Salmo salar*).

926 Lehnert, S. J., T. Kess, P. Bentzen, M. P. Kent, S. Lien, J. Gilbey, M. Clement, N. W. Jeffery, R. S. Waples, and I. R.  
Bradbury. 2019. Genomic signatures and correlates of widespread population declines in salmon. *Nature*

927 Leibowitz, S. G., R. L. Comeleo, P. J. Wigington, Jr., C. P. Weaver, P. E. Morefield, E. A. Sproles, and J. L. Ebersole.  
2014. Hydrologic landscape classification evaluates streamflow vulnerability to climate change in Oregon, USA.

928 Lejk, A. M., S. Smolinski, G. Radtke, and A. Martyniak. 2021. Higher growth variability and stronger responses to  
temperature changes in wild than hatchery-reared sea trout (*Salmo trutta* L.). *Ecology and Evolution* 11:10207-

929 LeMoine, M. T., L. A. Eby, C. G. Clancy, L. G. Nyce, M. J. Jakober, and D. J. Isaak. 2020. Landscape resistance  
mediates native fish species distribution shifts and vulnerability to climate change in riverscapes. *Global Change*

930 Lennox, R. J., C. M. Alexandre, P. R. Almeida, K. M. Bailey, B. T. Barlaup, K. Boe, A. Breukelaar, J. Erkinaro, T.  
Forseth, S. E. Gabrielsen, E. Halfyard, E. M. Hanssen, S. Karlsson, S. Koch, A. Koed, R. M. Langaker, H. Lo, M. C.  
Lucas, S. Mahlum, C. Perrier, U. Pulg, T. Sheehan, H. Skoglund, M. Svenning, E. B. Thorstad, G. Velle, F. G.  
Whoriskey, and K. W. Vollset. 2021. The quest for successful Atlantic salmon restoration: perspectives, priorities,

931 Lennox, R. J., E. J. Eliason, T. B. Havn, M. R. Johansen, E. B. Thorstad, S. J. Cooke, O. H. Diserud, F. G. Whoriskey, A.  
P. Farrell, and I. Uglem. 2018. Bioenergetic consequences of warming rivers to adult Atlantic salmon *Salmo salar*  
during their spawning migration. *Freshwater Biology* 63:1381-1393.

932 Lennox, R. J., S. H. Eldoy, K. W. Vollset, K. M. Miller, S. R. Li, K. H. Kaukinen, T. E. Isaksen, and J. G. Davidsen. 2020.  
How pathogens affect the marine habitat use and migration of sea trout (*Salmo trutta*) in two Norwegian fjord

933 Lennox, R. J., U. Pulg, B. Malley, S. E. Gabrielsen, E. M. Hanssen, S. J. Cooke, K. Birnie-Gauvin, B. T. Barlaup, and K.  
W. Vollset. 2021. The various ways that anadromous salmonids use lake habitats to complete their life history.

934 Leppi, J. C., D. J. Rinella, R. R. Wilson, and W. M. Loya. 2014. Linking climate change projections for an Alaskan  
watershed to future coho salmon production. *Global Change Biology* 20:1808-1820.

935 Levi, T., J. M. Allen, D. Bell, J. Joyce, J. R. Russell, D. A. Tallmon, S. C. Vulstek, C. Y. Yang, and D. W. Yu. 2019.  
Environmental DNA for the enumeration and management of Pacific salmon. *Molecular Ecology Resources* 19:597-

936 Lewis, J. M., G. Klein, P. J. Walsh, and S. Currie. 2012. Rainbow trout (*Oncorhynchus mykiss*) shift the age  
composition of circulating red blood cells towards a younger cohort when exposed to thermal stress. *Journal of*  
*Comparative Physiology B-Biochemical Systemic and Environmental Physiology* 182:663-671.

937 Li, J. J., S. H. Huang, Z. Y. Liu, and Y. X. Bi. 2020. Climate-Driven Range Shifts of Brown Seaweed *Sargassum horneri*  
in the Northwest Pacific. *Frontiers in Marine Science* 7.

- 938 Li, P. C., W. M. Zhang, N. J. Burnett, D. Z. Zhu, M. Casselman, and S. G. Hinch. 2021. Evaluating Dam Water Release Strategies for Migrating Adult Salmon Using Computational Fluid Dynamic Modeling and Biotelemetry. *Water*
- 939 Li, S., L. Wu, Y. Yang, T. Geng, W. Cai, B. Gan, Z. Chen, Z. Jing, G. Wang, and X. Ma. 2020. The Pacific Decadal Oscillation less predictable under greenhouse warming. *Nature Climate Change* 10:30-34.
- 940 Liedvogel, M., S. Akesson, and S. Bensch. 2011. The genetics of migration on the move. *Trends in Ecology &*
- 941 Lilly, L. E., and M. D. Ohman. 2021. Euphausiid spatial displacements and habitat shifts in the southern California Current System in response to El Nino variability. *Progress in Oceanography* 193.
- 942 Lim, D. D., C. L. Milligan, and Y. E. Morbey. 2020. Elevated incubation temperature improves later-life swimming endurance in juvenile Chinook salmon, *Oncorhynchus tshawytscha*. *Journal of Fish Biology* 97:1428-1439.
- 943 Limborg, M. T., S. M. Blankenship, S. F. Young, F. M. Utter, L. W. Seeb, M. H. H. Hansen, and J. E. Seeb. 2012. Signatures of natural selection among lineages and habitats in *Oncorhynchus mykiss*. *Ecology and Evolution* 2:1-
- 944 Lin, F., H. L. Osachoff, and C. J. Kennedy. 2020. Physiological disturbances in juvenile sockeye salmon (*Oncorhynchus nerka*) exposed to the water-soluble fraction of diluted bitumen. *Aquatic Toxicology* 220.
- 945 Lin, F., L. Baillon, V. S. Langlois, and C. J. Kennedy. 2021. Environmental modulators of diluted bitumen effects in juvenile pink salmon (*Oncorhynchus gorbuscha*). *Marine Environmental Research* 169.
- 946 Lin, J. E., J. J. Hard, R. Hilborn, and L. Hauser. 2017. Modeling local adaptation and gene flow in sockeye salmon.
- 947 Lindley, S. T., R. Schick, E. Mora, P. Adams, J. Anderson, S. Greene, C. Hanson, B. May, D. McEwan, R. McFarlane, C. Swanson, and J. Williams. 2007. Framework for assessing the viability of threatened and endangered Chinook salmon and steelhead in the Sacramento-San Joaquin basin. *San Francisco Estuary and Watershed Science* 5:1.
- 948 Linnansaari, T., and R. A. Cunjak. 2010. Patterns in apparent survival of Atlantic salmon (*Salmo salar*) parr in relation to variable ice conditions throughout winter. *Canadian Journal of Fisheries and Aquatic Sciences* 67:1744-
- 949 Lischka, S., and U. Riebesell. 2012. Synergistic effects of ocean acidification and warming on overwintering pteropods in the Arctic. *Global Change Biology* 18:3517-3528.
- 950 Liss, S. A., K. R. Znotinas, S. E. Blackburn, E. S. Fischer, J. S. Hughes, R. A. Harnish, H. D. Li, and Z. D. Deng. 2021. From 95 to 59 millimetres: a new active acoustic tag size guideline for salmon. *Canadian Journal of Fisheries and*
- 951 Little, A. G., E. Hardison, K. Kraskura, T. Dressler, T. S. Prystay, B. Hendriks, J. N. Pruitt, A. P. Farrell, S. J. Cooke, D. A. Patterson, S. G. Hinch, and E. J. Eliason. 2020. Reduced lactate dehydrogenase activity in the heart and suppressed sex hormone levels are associated with female-biased mortality during thermal stress in Pacific
- 952 Little, A. G., I. Loughland, and F. Seebacher. 2020. What do warming waters mean for fish physiology and fisheries? *Journal of Fish Biology* 97:328-340.
- 953 Litz, M. N. C., J. A. Miller, R. D. Brodeur, E. A. Daly, L. A. Weitkamp, A. G. Hansen, and A. M. Claiborne. 2019. Energy dynamics of subyearling Chinook salmon reveal the importance of piscivory to short-term growth during
- 954 Litz, M. N. C., M. Agha, A. M. Dufault, A. M. Claiborne, J. P. Losee, and A. J. Anderson. 2021. Competition with odd-year pink salmon in the ocean affects natural populations of chum salmon from Washington. *Marine Ecology*
- 955 Litz, M. N. C., R. D. Brodeur, R. L. Emmett, S. S. Heppell, R. S. Rasmussen, L. O'Higgins, and M. S. Morris. 2010. Effects of variable oceanographic conditions on forage fish lipid content and fatty acid composition in the
- 956 Litz, M. N. C., R. L. Emmett, P. J. Bentley, A. M. Claiborne, and C. Barcelo. 2014. Biotic and abiotic factors influencing forage fish and pelagic nekton community in the Columbia River plume (USA) throughout the
- 957 Litzow, M. A., F. J. Mueter, and A. J. Hobday. 2014. Reassessing regime shifts in the North Pacific: incremental climate change and commercial fishing are necessary for explaining decadal-scale biological variability. *Global*
- 958 Litzow, M. A., L. Ciannelli, C. J. Cunningham, B. Johnson, and P. Puerta. 2019. Nonstationary effects of ocean temperature on Pacific salmon productivity. *Canadian Journal of Fisheries and Aquatic Sciences* 76:1923-1928.
- 959 Litzow, M. A., L. Ciannelli, P. Puerta, J. J. Wettstein, R. R. Rykaczewski, and M. Opiekun. 2018. Non-stationary climate-salmon relationships in the Gulf of Alaska. *Proceedings of the Royal Society B-Biological Sciences* 285.
- 960 Litzow, M. A., M. E. Hunsicker, E. J. Ward, S. C. Anderson, J. Gao, S. G. Zador, S. Batten, S. C. Dressel, J. Duffy-Anderson, E. Fergusson, R. R. Hopcroft, B. J. Laurel, and R. O'Malley. 2020. Evaluating ecosystem change as Gulf of Alaska temperature exceeds the limits of preindustrial variability. *Progress in Oceanography* 186:102393.
- 961 Litzow, M. A., M. E. Hunsicker, N. A. Bond, B. J. Burke, C. J. Cunningham, J. L. Gosselin, E. L. Norton, E. J. Ward, and S. G. Zador. 2020. The changing physical and ecological meanings of North Pacific Ocean climate indices. *Proceedings of the National Academy of Sciences of the United States of America* 117:7665-7671.
- 962 Litzow, M. A., M. J. Malick, N. A. Bond, C. J. Cunningham, J. L. Gosselin, and E. J. Ward. 2020. Quantifying a Novel Climate Through Changes in PDO-Climate and PDO-Salmon Relationships. *Geophysical Research Letters* 47.

- 963 Liu, C. Y., S. L. Dong, Y. G. Zhou, K. P. Shi, Z. Pan, D. J. Sun, and Q. F. Gao. 2019. Temperature-Dependent Fatty Acid Composition Change of Phospholipid in Steelhead Trout (*Oncorhynchus mykiss*) Tissues. *Journal of Ocean*
- 964 Llopiz, J. K., R. K. Cowen, M. J. Hauff, R. Ji, P. L. Munday, B. A. Muhling, M. A. Peck, D. E. Richardson, S. Sogard, and S. Sponaugle. 2014. Early life history and fisheries oceanography: New questions in a changing world.
- 965 Logerwell, E., M. Busby, C. Carothers, S. Cotton, J. Duffy-Anderson, E. Farley, P. Goddard, R. Heintz, B. Holladay, J. Horne, S. Johnson, B. Lauth, L. Moulton, D. Neff, B. Norcross, S. Parker-Stetter, J. Seigle, and T. Sformo. 2015. Fish communities across a spectrum of habitats in the western Beaufort Sea and Chukchi Sea. *Progress in*
- 966 Löhmus, M., and M. Björklund. 2015. Climate change: what will it do to fish-parasite interactions? *Biological Journal of the Linnean Society* 116:397-411.
- 967 Lohmus, M., L. F. Sundstrom, M. Bjorklund, and R. H. Devlin. 2010. Genotype-temperature interaction in the regulation of development, growth, and morphometrics in wild-type, and growth-hormone transgenic coho
- 968 Lohmus, M., M. Bjorklund, L. F. Sundstrom, and R. H. Devlin. 2010. Effects of temperature and growth hormone on individual growth trajectories of wild-type and transgenic coho salmon *Oncorhynchus kisutch*. *Journal of Fish*
- 969 Lombard, P. J., R. W. Dudley, M. J. Collins, R. Saunders, and E. Atkinson. 2021. Model estimated baseflow for streams with endangered Atlantic Salmon in Maine, USA. *River Research and Applications* 37:1254-1264.
- 970 Lonnstedt, O. M., P. L. Munday, M. I. McCormick, M. C. O. Ferrari, and D. P. Chivers. 2013. Ocean acidification and responses to predators: Can sensory redundancy reduce the apparent impacts of elevated CO<sub>2</sub> on fish? *Ecology*
- 971 LovellFord, R. M., R. L. Flitcroft, S. L. Lewis, M. V. Santelmann, and G. E. Grant. 2020. Patterns of River Discharge and Temperature Differentially Influence Migration and Spawn Timing for Coho Salmon in the Umpqua River Basin, Oregon. *Transactions of the American Fisheries Society* 149:695-708.
- 972 Lusardi, R. A., A. L. Nichols, A. D. Willis, C. A. Jeffres, A. H. Kiers, E. E. Van Nieuwenhuyse, and R. A. Dahlgren. 2021. Not All Rivers Are Created Equal: The Importance of Spring-Fed Rivers under a Changing Climate. *Water* 13.
- 973 Lusardi, R. A., B. G. Hammock, C. A. Jeffres, R. A. Dahlgren, and J. D. Kiernan. 2020. Oversummer growth and survival of juvenile coho salmon (*Oncorhynchus kisutch*) across a natural gradient of stream water temperature and prey availability: an in situ enclosure experiment. *Canadian Journal of Fisheries and Aquatic Sciences* 77:413-
- 974 Lynn, T. J., J. W. Jeong, and M. S. Duffy. 2020. Bet hedging and cold-temperature termination of diapause in the life history of the Atlantic salmon ectoparasite *Argulus canadensis*. *Parasitology* 147:1774-1785.
- 975 Lyons, J., A. L. Rypel, P. W. Rasmussen, T. E. Burzynski, B. T. Eggold, J. T. Myers, T. J. Paoli, and P. B. McIntyre. 2015. Trends in the Reproductive Phenology of two Great Lakes Fishes. *Transactions of the American Fisheries*
- 976 Lysenko, A. V., T. A. Shatilina, and L. A. Gayko. 2021. Effect of Hydrometeorological Conditions on Dynamics of Catches (Abundance) of the Primorye Pink Salmon *Oncorhynchus gorbusha* Based on Retrospective Data (Sea of
- 977 Ma, S. Y., D. Liu, Y. J. Tian, C. H. Fu, J. C. Li, P. L. Ju, P. Sun, Z. J. Ye, Y. Liu, and Y. Watanabe. 2021. Critical transitions and ecological resilience of large marine ecosystems in the Northwestern Pacific in response to global warming.
- 978 Macdonald, J. S., D. A. Patterson, M. J. Hague, and I. C. Guthrie. 2010. Modeling the influence of environmental factors on spawning migration mortality for sockeye salmon fisheries management in the Fraser River, British Columbia. *Transactions of the American Fisheries Society* 139:768-782.
- 979 Macdonald, J. S., J. Morrison, and D. A. Patterson. 2012. The efficacy of reservoir flow regulation for cooling migration temperature for sockeye salmon in the Nechako River Watershed of British Columbia. *North American*
- 980 MacDonald, R. J., S. Boon, J. M. Byrne, M. D. Robinson, and J. B. Rasmussen. 2014. Potential future climate effects on mountain hydrology, stream temperature, and native salmonid life history. *Canadian Journal of Fisheries and*
- 981 MacFarlane, R. B. 2010. Energy dynamics and growth of Chinook salmon (*Oncorhynchus tshawytscha*) from the Central Valley of California during the estuarine phase and first ocean year. *Canadian Journal of Fisheries and*
- 982 Mackas, D. L., S. Batten, and M. Trudel. 2007. Effects on zooplankton of a warmer ocean: Recent evidence from the Northeast Pacific. *Progress in Oceanography* 75:223-252.
- 983 MacKenzie, L. A., K. F. Smith, L. L. Rhodes, A. Brown, V. Langi, M. Edgar, G. Lovell, and M. Preece. 2011. Mortalities of sea-cage salmon (*Oncorhynchus tshawytscha*) due to a bloom of *Pseudochattonella verruculosa* (Dictyochophyceae) in Queen Charlotte Sound, New Zealand. *Harmful Algae* 11:45-53.
- 984 Mackey, T. E., C. T. Hasler, T. Durhack, J. D. Jeffrey, C. J. Macnaughton, K. Ta, E. C. Enders, and K. M. Jeffries. 2021. Molecular and physiological responses predict acclimation limits in juvenile brook trout (*Salvelinus fontinalis*).
- 985 MacKinnon, B., D. Groman, M. D. Fast, A. J. Manning, P. Jones, A. M. MacKinnon, and S. St-Hilaire. 2020. Transmission experiment in Atlantic salmon (*Salmo salar*) with an Atlantic Canadian isolate of *Moritella viscosa*.
- 986 MacLennan, M. M., C. Dings-Avery, and R. D. Vinebrooke. 2015. Invasive trout increase the climatic sensitivity of zooplankton communities in naturally fishless lakes. *Freshwater Biology* 60:1502-1513.



- 987 Macnaughton, C. J., D. Deslauriers, E. L. Ipsen, E. Corey, and E. C. Enders. 2019. Using meta-analysis to derive a respiration model for Atlantic salmon (*Salmo salar*) to assess bioenergetics requirements of juveniles in two Canadian rivers. *Canadian Journal of Fisheries and Aquatic Sciences* 76:2225-2234.
- 988 Macnaughton, C. J., T. C. Durhack, N. J. Mochnacz, and E. C. Enders. 2021. Metabolic performance and thermal preference of westslope cutthroat trout (*Oncorhynchus clarkii lewisi*) and non-native trout across an ecologically relevant range of temperatures. *Canadian Journal of Fisheries and Aquatic Sciences* 78:1247-1256.
- 989 MacNeil, M. A., N. A. J. Graham, J. E. Cinner, N. K. Dulvy, P. A. Loring, S. Jennings, N. V. C. Polunin, A. T. Fisk, and T. R. McClanahan. 2010. Transitional states in marine fisheries: Adapting to predicted global change. *Philosophical Transactions of the Royal Society B* 365:1271-1281.
- 990 Macqueen, D. J., and I. A. Johnston. 2014. A well-constrained estimate for the timing of the salmonid whole genome duplication reveals major decoupling from species diversification. *Proceedings of the Royal Society B* 281:20132711-20132718.
- 991 Madaro, A., O. Folkedal, S. Maiolo, M. Albanopoulou, and R. E. Olsen. 2018. Effects of acclimation temperature on cortisol and oxygen consumption in Atlantic salmon (*Salmo salar*) post-smolt exposed to acute stress. *Aquaculture* 425:105-114.
- 992 Madsen, R. P. A., M. W. Jacobsen, K. G. O'Malley, R. Nygaard, K. Praebel, B. Jonsson, J. M. Pujolar, D. J. Fraser, L. Bernatchez, and M. M. Hansen. 2020. Genetic population structure and variation at phenology-related loci in anadromous Arctic char (*Salvelinus alpinus*). *Ecology of Freshwater Fish* 29:1-15.
- 993 Magel, C. L., E. M. J. Lee, A. M. Strawn, K. Swieca, and A. D. Jensen. 2020. Connecting Crabs, Currents, and Coastal Communities: Examining the Impacts of Changing Ocean Conditions on the Distribution of US West Coast Crabs. *Estuaries and Coasts* 43:1011-1025.
- 994 Magerhans, A., and G. Horstgen-Schwark. 2010. Selection experiments to alter the sex ratio in rainbow trout (*Oncorhynchus mykiss*) by means of temperature treatment. *Aquaculture* 306:63-67.
- 995 Mahardja, B., V. Tobias, S. Khanna, L. Mitchell, P. Lehman, T. Sommer, L. Brown, S. Culberson, and J. L. Conrad. 2021. Resistance and resilience of pelagic and littoral fishes to drought in the San Francisco Estuary. *Ecological Applications* 31:e2991.
- 996 Mahony, A. M., S. C. Johnson, C. M. Neville, M. E. Thiess, and S. R. M. Jones. 2017. *Myxobolus arcticus* and *Parvicapsula minibicornis* infections in sockeye salmon *Oncorhynchus nerka* following downstream migration in British Columbia. *Journal of Fish Diseases* 40:101-112.
- 997 Mainstone, C. P., R. Thomas, C. W. Bean, and T. Waterman. 2012. The role of the UK conservation agencies in protecting river flows. *Fisheries Management and Ecology* 19:557-569.
- 998 Majerova, M., B. T. Neilson, and B. B. Roper. 2020. Beaver dam influences on streamflow hydraulic properties and thermal regimes. *Science of the Total Environment* 718:137311.
- 999 Makaras, T., M. Stankeviciute, E. Sidagyte-Copilas, T. Virbickas, and J. Razumiene. 2021. Acclimation effect on fish behavioural characteristics: determination of appropriate acclimation period for different species. *Journal of Fish Biology* 98:101-112.
- 1000 Malakauskas, D. M., and M. A. Wilzbach. 2012. Invertebrate assemblages in the lower Klamath River, with reference to *Manayunkia speciosa*. *California Fish and Game* 98:214-235.
- 1001 Malcolm, I. A., A. F. Youngson, C. Soulsby, C. Imholt, and R. J. Fryer. 2011. Is interstitial velocity a good predictor of salmonid embryo survival? *Transactions of the American Fisheries Society* 140:898-904.
- 1002 Malick, M. J. 2020. Time-varying relationships between ocean conditions and sockeye salmon productivity. *ICES Journal of Marine Science* 77:1-12.
- 1003 Malick, M. J., S. P. Cox, F. J. Mueter, and R. M. Peterman. 2015. Linking phytoplankton phenology to salmon productivity along a north-south gradient in the Northeast Pacific Ocean. *Canadian Journal of Fisheries and Aquatic Sciences* 72:101-112.
- 1004 Mallela, A., and A. Hastings. 2021. Tipping Cascades in a Multi-patch System with Noise and Spatial Coupling. *Journal of Theoretical Biology* 508:110551.
- 1005 Mallet, J., and R. F. Thurow. 2021. Resurrecting an Idaho Icon: How Research and Management Reversed Declines of Native Westslope Cutthroat Trout. *Fisheries* 42:1-12.
- 1006 Management Plan in 2020 for Southern Resident Killer Whales and their Current and Proposed Critical Habitat. *NOAA Fisheries Service* 2020:1-100.
- 1007 Maneja, R. H., A. Y. Frommel, A. J. Geffen, A. Folkvord, U. Piatkowski, M. Y. Chang, and C. Clemmesen. 2013. Effects of ocean acidification on the calcification of otoliths of larval Atlantic cod *Gadus morhua*. *Marine Ecology Progress Series* 461:1-12.
- 1008 Maneja, R. H., A. Y. Frommel, H. I. Browman, C. Clemmesen, A. J. Geffen, A. Folkvord, U. Piatkowski, C. M. F. Durif, R. Bjelland, and A. B. Skiftesvik. 2013. The swimming kinematics of larval Atlantic cod, *Gadus morhua* L., are related to otolith size and shape. *Journal of Fish Biology* 83:101-112.
- 1009 Manhard, C. V., J. E. Joyce, and A. J. Gharrett. 2017. Evolution of phenology in a salmonid population: a potential adaptive response to climate change. *Canadian Journal of Fisheries and Aquatic Sciences* 74:1519-1527.
- 1010 Manhard, C. V., M. D. Adkison, J. J. Hard, W. W. Smoker, and A. J. Gharrett. 2018. Local adaptation of phenology revealed in outcrosses between spawning segments of a salmonid population. *Molecular Ecology* 27:4698-4710.
- 1011 Manhard, C. V., N. A. Som, R. W. Perry, and J. M. Plumb. 2018. A laboratory-calibrated model of coho salmon growth with utility for ecological analyses. *Canadian Journal of Fisheries and Aquatic Sciences* 75:682-690.
- 1012 Mann, R. D., and C. G. Snow. 2018. Population-specific migration patterns of wild adult summer-run Chinook salmon passing Wells Dam, Washington. *North American Journal of Fisheries Management* 38:377-392.

- 1013 Mantua, N. J. 2015. Shifting patterns in Pacific climate, West Coast salmon survival rates, and increased volatility in ecosystem services. *Proceedings of the National Academy of Sciences of the United States of America*
- 1014 Mantua, N. J., L. G. Crozier, T. E. Reed, D. E. Schindler, and R. S. Waples. 2015. CORRESPONDENCE: Response of chinook salmon to climate change. *Nature Climate Change* 5:613-615.
- 1015 Mantua, N. J., L. G. Crozier, T. E. Reed, R. S. Waples, and D. E. Schindler. 2015. Reply to 'Response of chinook salmon to climate change'. *Nature Climate Change* 5:615-615.
- 1016 Mantua, N., I. Tohver, and A. Hamlet. 2010. Climate change impacts on streamflow extremes and summertime stream temperature and their possible consequences for freshwater salmon habitat in Washington State. *Climatic*
- 1017 Mantyniemi, S., A. Romakkaniemi, J. Dannewitz, S. Palm, T. Pakarinen, H. Pulkkinen, A. Grdmark, and O. Karlsson. 2012. Both predation and feeding opportunities may explain changes in survival of Baltic salmon post-smolts. *Ices*
- 1018 Marcoe, K., and S. Pilson. 2017. Habitat change in the lower Columbia River estuary, 1870–2009. *Journal of*
- 1019 Marcos-Lopez, M., P. Gale, B. C. Oidtmann, and E. J. Peeler. 2010. Assessing the impact of climate change on disease emergence in freshwater fish in the United Kingdom. *Transboundary and Emerging Diseases* 57:293-304.
- 1020 Mari, L., M. Daufresne, J. Guillard, G. Evanno, and E. Lasne. 2021. Elevated temperature and deposited sediment jointly affect early life history traits in southernmost Arctic char populations. *Canadian Journal of Fisheries and*
- 1021 Marquez, I., E. Garcia-Vazquez, and Y. J. Borrell. 2014. Possible effects of vaccination and environmental changes on the presence of disease in northern Spanish fish farms. *Aquaculture* 431:118-123.
- 1022 Marschall, E. A., M. E. Mather, D. L. Parrish, G. W. Allison, and J. R. McMenemy. 2011. Migration delays caused by anthropogenic barriers: Modeling dams, temperature, and success of migrating salmon smolts. *Ecological*
- 1023 Marsh, J. E., R. B. Lauridsen, S. D. Gregory, P. Kratina, L. J. Scott, D. Cooling, and J. I. Jones. 2021. High summer macrophyte cover increases abundance, growth, and feeding of juvenile Atlantic salmon. *Ecological Applications*.
- 1024 Marsh, J. E., R. B. Lauridsen, S. D. Gregory, W. R. C. Beaumont, L. J. Scott, P. Kratina, and J. I. Jones. 2019. Above parr: Lowland river habitat characteristics associated with higher juvenile Atlantic salmon (*Salmo salar*) and brown
- 1025 Marsh, J. E., R. J. Cove, J. R. Britton, R. G. Wellard, A. House, and S. D. Gregory. 2021. Medium-term environmental changes influence age-specific survival estimates in a salmonid population. *Freshwater Biology* 66:1530-1545.
- 1026 Marsha, A. L., E. A. Steel, and A. H. Fullerton. 2021. Modeling thermal metrics of importance for native vs non-native fish across stream networks to provide insight for watershed-scale fisheries management. *Freshwater*
- 1027 Marshall, A. M., M. Foard, C. M. Cooper, P. Edwards, S. L. Hirsch, M. Russell, and T. E. Link. 2020. Climate change literature and information gaps in mountainous headwaters of the Columbia River Basin. *Regional Environmental*
- 1028 Marshall, K. N., I. C. Kaplan, E. E. Hodgson, A. Hermann, D. S. Busch, P. Mcelhany, T. E. Essington, C. J. Harvey, and E. A. Fulton. 2017. Risks of ocean acidification in the California Current food web and fisheries: ecosystem model
- 1029 Martens, K. D., W. D. Devine, T. V. Minkova, and A. D. Foster. 2019. Stream Conditions after 18 Years of Passive Riparian Restoration in Small Fish-bearing Watersheds. *Environmental Management* 63:673-690.
- 1030 Martin, B. T., A. Pike, S. N. John, N. Hamda, J. Roberts, S. T. Lindley, and E. M. Danner. 2017. Phenomenological vs. biophysical models of thermal stress in aquatic eggs. *Ecology Letters* 20:50-59.
- 1031 Martin, B. T., P. N. Dudley, N. S. Kashef, D. M. Stafford, W. J. Reeder, D. Tonina, A. M. Del Rio, J. S. Foott, and E. M. Danner. 2020. The biophysical basis of thermal tolerance in fish eggs. *Proceedings of the Royal Society B-Biological*
- 1032 Martin, D. J., A. A. Shelly, R. J. Danehy, E. D. Lang, and J. Hvozda. 2019. Coho Salmon Growth in Relation to Natural Turbidity Regimes in a Coastal Stream of Northern California. *Transactions of the American Fisheries Society*
- 1033 Martin, P., J. Rancon, G. Segura, J. Laffont, G. Boeuf, and S. Dufour. 2012. Experimental study of the influence of photoperiod and temperature on the swimming behaviour of hatchery-reared Atlantic salmon (*Salmo salar* L.)
- 1034 Martinez, A. S., J. R. Willoughby, and M. R. Christie. 2018. Genetic diversity in fishes is influenced by habitat type and life-history variation. *Ecology and Evolution* 8:12022-12031.
- 1035 Martinez, J., T. Fu, X. Y. Li, H. F. Hou, J. X. Wang, M. B. Eppard, and Z. D. Deng. 2021. A large dataset of detection and submeter-accurate 3-D trajectories of juvenile Chinook salmon. *Scientific Data* 8.
- 1036 Martins, E. G., S. G. Hinch, D. A. Patterson, M. J. Hague, S. J. Cooke, K. M. Miller, D. Robichaud, K. K. English, and A. P. Farrell. 2012. High river temperature reduces survival of sockeye salmon (*Oncorhynchus nerka*) approaching spawning grounds and exacerbates female mortality. *Canadian Journal of Fisheries and Aquatic Sciences* 69:330-
- 1037 Martins, E. G., S. G. Hinch, D. A. Patterson, M. J. Hague, S. J. Cooke, K. M. Miller, M. F. Lapointe, K. K. English, and A. P. Farrell. 2011. Effects of river temperature and climate warming on stock-specific survival of adult migrating Fraser River sockeye salmon (*Oncorhynchus nerka*). *Global Change Biology* 17:99-114.

- 1038 Martins, E. G., S. G. Hinch, S. J. Cooke, and D. A. Patterson. 2012. Climate effects on growth, phenology, and survival of sockeye salmon (*Oncorhynchus nerka*): A synthesis of the current state of knowledge and future research directions. *Reviews in Fish Biology and Fisheries* 22:887-914.
- 1039 Matala, A. P., M. W. Ackerman, M. R. Campbell, and S. R. Narum. 2014. Relative contributions of neutral and non-neutral genetic differentiation to inform conservation of steelhead trout across highly variable landscapes.
- 1040 Maternal State, Egg Quality, and Fitness in Chinook Salmon. University of Windsor, Windsor, Ontario, Canada.
- 1041 Mathes, M. T., S. G. Hinch, S. J. Cooke, G. T. Crossin, D. A. Patterson, A. G. Lotto, and A. P. Farrell. 2010. Effect of water temperature, timing, physiological condition, and lake thermal refugia on migrating adult Weaver Creek sockeye salmon (*Oncorhynchus nerka*). *Canadian Journal of Fisheries and Aquatic Sciences* 67:70-84.
- 1042 Matte, J. M., D. J. Fraser, and J. W. A. Grant. 2020. Population variation in density-dependent growth, mortality and their trade-off in a stream fish. *Journal of Animal Ecology* 89:541-552.
- 1043 Mawdsley, J. R., R. O'Malley, and D. S. Ojima. 2009. A Review of Climate-Change Adaptation Strategies for Wildlife Management and Biodiversity Conservation. *Conservation Biology* 23:1080-1089.
- 1044 Mayor, D., C. Matthews, K. Cook, A. Zuur, and S. Hay. 2007. CO<sub>2</sub>-induced acidification affects hatching success in *Calanus finmarchicus*. *Mar Ecol Prog Ser* 350:91-97.
- 1045 McCann, E. L., N. S. Johnson, and K. L. Pangle. 2018. Corresponding long-term shifts in stream temperature and invasive fish migration. *Canadian Journal of Fisheries and Aquatic Sciences* 75:772-778.
- 1046 McCarrick, D. K., C. J. Roth, D. J. Schill, B. High, and M. C. Quist. 2019. Effects of Air Exposure on Survival of Yellowstone Cutthroat Trout Angled from a Stream with Warm Water Temperatures. *Journal of Fish and Wildlife*
- 1047 McCarthy, M. D., D. J. Rinella, and B. P. Finney. 2018. Sockeye salmon population dynamics over the past 4000 years in Upper Russian Lake, south-central Alaska. *Journal of Paleolimnology* 60:67-75.
- 1048 McClure, M. M., M. Alexander, D. Borggaard, D. Boughton, L. Crozier, R. Griffis, J. C. Jorgensen, S. T. Lindley, J. Nye, M. J. Rowland, E. E. Seney, A. Snover, C. Toole, and K. Van Houtan. 2013. Incorporating climate science in applications of the U.S. Endangered Species Act for aquatic species. *Conservation Biology* 27:1222-1233.
- 1049 McConnell, C. J., S. Atkinson, D. Oxman, and P. A. H. Westley. 2019. Is blood cortisol or vateritic otolith composition associated with natal dispersal or reproductive performance on the spawning grounds of straying and homing hatchery-produced chum salmon (*Oncorhynchus keta*) in Southeast Alaska? *Biology Open* 8:10.
- 1050 McCormick, S. D., and A. M. Regish. 2018. Effects of ocean acidification on salinity tolerance and seawater growth of Atlantic salmon *Salmo salar* smolts. *Journal of Fish Biology* 93:560-566.
- 1051 McCoy, A. L., S. R. Holmes, and B. A. Boisjolie. 2018. Flow restoration in the Columbia River Basin: An evaluation of a flow restoration accounting framework. *Environmental Management* 61:506-519.
- 1052 McDaniels, T., S. Wilmot, M. Healey, and S. Hinch. 2010. Vulnerability of Fraser River sockeye salmon to climate change: A life cycle perspective using expert judgments. *Journal of Environmental Management* 91:2771-2780.
- 1053 McDermid, J. L., C. C. Wilson, W. N. Sloan, and B. J. Shuter. 2013. Intraspecific differences in thermal biology among inland lake trout populations. *Transactions of the American Fisheries Society* 142:756-766.
- 1054 McDermid, J. L., F. A. Fischer, M. Al-Shamli, W. N. Sloan, N. E. Jones, and C. C. Wilson. 2012. Variation in acute thermal tolerance within and among hatchery strains of brook trout. *Transactions of the American Fisheries*
- 1055 McElroy, B., A. DeLonay, and R. Jacobson. 2012. Optimum swimming pathways of fish spawning migrations in
- 1056 McEvoy, A., M. Nielsen-Pincus, A. Holz, A. J. Catalano, and K. E. Gleason. 2020. Projected Impact of Mid-21st Century Climate Change on Wildfire Hazard in a Major Urban Watershed outside Portland, Oregon USA. *Fire-*
- 1057 McGaughan, A., R. Laver, and C. Fraser. 2021. Evolutionary Responses to Warming. *Trends in Ecology & Evolution*
- 1058 McGill, L. M., J. R. Brooks, and E. A. Steel. 2021. Spatiotemporal dynamics of water sources in a mountain river basin inferred through delta H-2 and delta O-18 of water. *Hydrological Processes* 35.
- 1059 McGrath, E. O., N. N. Neumann, and C. F. Nichol. 2017. A statistical model for managing water temperature in streams with anthropogenic influences. *River Research and Applications* 33:123-134.
- 1060 McHugh, P. A., W. C. Saunders, N. Bouwes, C. E. Wall, S. Bangen, J. M. Wheaton, M. Nahorniak, J. R. Ruzyski, I. A. Tattam, and C. E. Jordan. 2017. Linking models across scales to assess the viability and restoration potential of a threatened population of steelhead (*Oncorhynchus mykiss*) in the Middle Fork John Day River, Oregon, USA.
- 1061 McKean, J., and D. Tonina. 2013. Bed stability in unconfined gravel bed mountain streams: With implications for salmon spawning viability in future climates. *Journal of Geophysical Research-Earth Surface* 118:1227-1240.
- 1062 McKenzie, C. H., S. S. Bates, J. L. Martin, N. Haigh, K. L. Howland, N. I. Lewis, A. Locke, A. Pena, M. Poulin, W. A. Rourke, M. G. Scarratt, M. Starr, and T. Wells. 2021. Three decades of Canadian marine harmful algal events: Phytoplankton and phycotoxins of concern to human and ecosystem health. *Harmful Algae* 102.

- 1063 McKenzie, D. J., Y. F. Zhang, E. J. Eliason, P. M. Schulte, G. Claireaux, F. R. Blasco, J. J. H. Nati, and A. P. Farrell. 2021. Intraspecific variation in tolerance of warming in fishes. *Journal of Fish Biology* 98:1536-1555.
- 1064 McKenzie, J. L., H. A. Araujo, J. L. Smith, D. Schluter, and R. H. Devlin. 2021. Incomplete reproductive isolation and strong transcriptomic response to hybridization between sympatric sister species of salmon. *Proceedings of the*
- 1065 McKinnell, S. 2008. Fraser River sockeye salmon productivity and climate: A re-analysis that avoids an undesirable property of Ricker's curve. *Progress in Oceanography* 77:146-154.
- 1066 McKinnell, S., and M. Reichardt. 2012. Early marine growth of juvenile Fraser River sockeye salmon (*Oncorhynchus nerka*) in relation to juvenile pink (*Oncorhynchus gorbuscha*) and sockeye salmon abundance.
- 1067 McKinnell, S., E. Curchitser, K. Groot, M. Kaeriyama, and M. Trudel. 2014. Oceanic and atmospheric extremes motivate a new hypothesis for variable marine survival of Fraser River sockeye salmon. *Fisheries Oceanography*
- 1068 McMillan, J. R., G. R. Pess, M. L. McHenry, R. Moses, and T. P. Quinn. 2014. Documentation of unusual, fall spawning by coastal cutthroat trout in the Elwha River system, Washington. *Transactions of the American*
- 1069 McMillan, J. R., J. B. Dunham, G. H. Reeves, J. S. Mills, and C. E. Jordan. 2012. Individual condition and stream temperature influence early maturation of rainbow and steelhead trout, *Oncorhynchus mykiss*. *Environmental*
- 1070 Meek, M. H., M. R. Stephens, A. Goodbla, B. May, and M. R. Baerwald. 2020. Identifying hidden biocomplexity and genomic diversity in Chinook salmon, an imperiled species with a history of anthropogenic influence. *Canadian*
- 1071 Meier, K., M. M. Hansen, E. Normandeau, K.-L. D. Mensberg, J. Frydenberg, P. F. Larsen, D. Bekkevold, and L. Bernatchez. 2014. Local adaptation at the transcriptome level in brown trout: Evidence from early life history
- 1072 Mejia, F. H., C. E. Torgersen, E. K. Berntsen, J. R. Maroney, J. M. Connor, A. H. Fullerton, J. L. Ebersole, and M. S. Lorang. 2020. Longitudinal, Lateral, Vertical, and Temporal Thermal Heterogeneity in a Large Impounded River:
- 1073 Melendez, C. L., and C. A. Mueller. 2021. Effect of increased embryonic temperature during developmental windows on survival, morphology and oxygen consumption of rainbow trout (*Oncorhynchus mykiss*). *Comparative*
- 1074 Melnychuk, M. C., C. J. Walters, V. Christensen, M. L. Bothwell, and D. W. Welch. 2012. Effects of solar ultraviolet radiation exposure on early ocean survival and fry-to-smolt growth of juvenile salmon. *Marine Ecology-Progress*
- 1075 Meshesha, T. W., J. Y. Wang, and N. D. Melaku. 2020. Modelling spatiotemporal patterns of water quality and its impacts on aquatic ecosystem in the cold climate region of Alberta, Canada. *Journal of Hydrology* 587.
- 1076 Meyer-Gutbrod, E., L. Kui, R. Miller, M. Nishimoto, L. Snook, and M. Love. 2021. Moving on up: Vertical distribution shifts in rocky reef fish species during climate-driven decline in dissolved oxygen from 1995 to 2009.
- 1077 Meyer, K. A., and D. J. Schill. 2021. The Gill-Oxygen Limitation Theory and size at maturity/maximum size relationships for salmonid populations occupying flowing waters. *Journal of Fish Biology* 98:44-49.
- 1078 Meyers, E. M. 2021. Protecting a displaced species in an altered river: a case study of the endangered Sacramento River winter-run Chinook Salmon. *California Fish and Game* 107:172-188.
- 1079 Meyers, E. M., B. Dobrowski, and C. L. Tague. 2010. Climate change impacts on flood frequency, intensity, and timing may affect trout species in Sagehen Creek, California. *Transactions of the American Fisheries Society*
- 1080 Meza-Matty, I. A., G. Ruiz-Campos, L. W. Daessle, A. Ruiz-Luna, A. A. Lopez-Lambrano, F. Camarena-Rosales, and K. R. Matthews. 2021. Daily, seasonal, and annual variability of temperature in streams inhabited by the endemic San Pedro Martir trout (*Oncorhynchus mykiss nelsoni*), in Baja California, Mexico, and the predicted temperature
- 1081 Michel, C. J. 2019. Decoupling outmigration from marine survival indicates outsized influence of streamflow on cohort success for California's Chinook salmon populations. *Canadian Journal of Fisheries and Aquatic Sciences*
- 1082 Michel, C. J., A. J. Ammann, S. T. Lindley, P. T. Sandstrom, E. D. Chapman, M. J. Thomas, G. P. Singer, A. P. Klimley, and R. B. MacFarlane. 2015. Chinook salmon outmigration survival in wet and dry years in California's Sacramento River. *Canadian Journal of Fisheries and Aquatic Sciences* 72:1749-1759.
- 1083 Michel, C. J., J. J. Notch, F. Cordoleani, A. J. Ammann, and E. M. Danner. 2021. Nonlinear survival of imperiled fish informs managed flows in a highly modified river. *Ecosphere* 12.
- 1084 Michel, C. J., M. J. Henderson, C. M. Loomis, J. M. Smith, N. J. Demetras, I. S. Iglesias, B. M. Lehman, and D. D. Huff. 2020. Fish predation on a landscape scale. *Ecosphere* 11.
- 1085 Middleton, C. T., S. G. Hinch, E. G. Martins, D. C. Braun, D. A. Patterson, N. J. Burnett, V. Minke-Martin, and M. T. Casselman. 2018. Effects of natal water concentration and temperature on the behaviour of up-river migrating sockeye salmon. *Canadian Journal of Fisheries and Aquatic Sciences* 75:2375-2389.
- 1086 Miller, A. S., T. F. Sheehan, M. D. Renkawitz, A. L. Meister, and T. J. Miller. 2012. Revisiting the marine migration of US Atlantic salmon using historical Carlin tag data. *Ices Journal of Marine Science* 69:1609-1615.
- 1087 Miller, D. D., Y. Ota, U. R. Sumaila, A. M. Cisneros-Montemayor, and W. W. L. Cheung. 2018. Adaptation strategies to climate change in marine systems. *Global Change Biology* 24:E1-E14.

- 1088 Miller, J. A., D. J. Teel, A. Baptista, and C. A. Morgan. 2013. Disentangling bottom-up and top-down effects on survival during early ocean residence in a population of Chinook salmon (*Oncorhynchus tshawytscha*). *Canadian*
- 1089 Miller, J. A., D. J. Teel, W. T. Peterson, and A. M. Baptista. 2014. Assessing the relative importance of local and regional processes on the survival of a threatened salmon population. *Plos One* 9.
- 1090 Miller, J. A., W. T. Peterson, L. A. Copeman, X. Du, C. A. Morgan, and M. N. C. Litz. 2017. Temporal variation in the biochemical ecology of lower trophic levels in the Northern California Current. *Progress in Oceanography* 155:1-
- 1091 Miller, K. M., A. Teffer, S. Tucker, S. Li, A. D. Schulze, M. Trudel, F. Juanes, A. Tabata, K. H. Kaukinen, N. G. Ginther, T. J. Ming, S. J. Cooke, J. M. Hipfner, D. A. Patterson, and S. G. Hinch. 2014. Infectious disease, shifting climates, and opportunistic predators: cumulative factors potentially impacting wild salmon declines. *Evolutionary*
- 1092 Miller, M., J. Brunelli, P. Wheeler, S. Liu, C. Rexroad, Y. Palti, C. Doe, and G. Thorgaard. 2012. A conserved haplotype controls parallel adaptation in geographically distant salmonid populations. *Molecular Ecology* 21:237-
- 1093 Miller, S. C., T. E. Gillis, and P. A. Wright. 2011. The ontogeny of regulatory control of the rainbow trout (*Oncorhynchus mykiss*) heart and how this is influenced by chronic hypoxia exposure. *Journal of Experimental*
- 1094 Miller, S. H., D. L. Breitburg, R. B. Burrell, and A. G. Keppel. 2016. Acidification increases sensitivity to hypoxia in important forage fishes. *Marine Ecology Progress Series* 549:1-8.
- 1095 Millidine, K. J., R. J. Fryer, and I. A. Malcolm. 2018. Understanding the effects of river regulation on Atlantic salmon fry: The importance of channel morphology. *River Research and Applications* 34:461-471.
- 1096 Milner, A. M., A. L. Robertson, L. E. Brown, S. H. Sonderland, M. McDermott, and A. J. Veal. 2011. Evolution of a stream ecosystem in recently deglaciated terrain. *Ecology* 92:1924-1935.
- 1097 Milner, A. M., A. L. Robertson, M. J. McDermott, M. J. Klaar, and L. E. Brown. 2013. Major flood disturbance alters river ecosystem evolution. *Nature Climate Change* 3:137-141.
- 1098 Milner, A. M., J. L. Picken, M. J. Klaar, A. L. Robertson, L. R. Clitherow, L. Eagle, and L. E. Brown. 2018. River ecosystem resilience to extreme flood events. *Ecol Evol* 8:8354-8363.
- 1099 Minegishi, Y., M. K. S. Wong, T. Kanbe, H. Araki, T. Kashiwabara, M. Ijichi, K. Kogure, and S. Hyodo. 2019. Spatiotemporal distribution of juvenile chum salmon in Otsuchi Bay, Iwate, Japan, inferred from environmental
- 1100 Minke-Martin, V., S. G. Hinch, D. C. Braun, N. J. Burnett, M. T. Casselman, E. J. Eliason, and C. T. Middleton. 2018. Physiological condition and migratory experience affect fitness-related outcomes in adult female sockeye salmon.
- 1101 Mitchell, C. J., E. Lawrence, V. R. Chu, M. J. Harris, W. G. Landis, K. E. von Stackelberg, and J. D. Stark. 2021. Integrating Metapopulation Dynamics into a Bayesian Network Relative Risk Model: Assessing Risk of Pesticides to Chinook Salmon (*Oncorhynchus tshawytscha*) in an Ecological Context. *Integrated Environmental Assessment and*
- 1102 Mizzau, T. W., S. R. Garner, S. A. C. Marklevitz, G. J. Thompson, and Y. E. Morbey. 2013. A genetic test of sexual size dimorphism in pre-emergent Chinook salmon. *Plos One* 8:e78421.
- 1103 Mock, A. J., C. R. Ruetz, J. N. McNair, D. Mays, and A. Martell. 2021. Evaluating Remote Site Incubators in Michigan Streams: Implications for Arctic Grayling Reintroduction. *North American Journal of Fisheries Management* 41:434-
- 1104 Moe, S. J., K. De Schamphelaere, W. H. Clements, M. T. Sorensen, P. J. Van den Brink, and M. Liess. 2013. Combined and interactive effects of global climate change and toxicants on populations and communities.
- 1105 Mogensen, S., and J. R. Post. 2012. Energy allocation strategy modifies growth-survival trade-offs in juvenile fish across ecological and environmental gradients. *Oecologia* 168:923-933.
- 1106 Mohn, A. M., K. W. Vollset, and E. Karlsbakk. 2020. Making the best of lousy circumstances: the impact of salmon louse *Lepeophtheirus salmonis* on depth preference of sea trout *Salmo trutta*. *Aquaculture Environment*
- 1107 Moir, H. J., and G. B. Pasternack. 2010. Substrate requirements of spawning Chinook salmon (*Oncorhynchus tshawytscha*) are dependents on local channel hydraulics. *River Research and Applications* 26:456-468.
- 1108 Mollmann, C., X. Cormon, S. Funk, S. A. Otto, J. O. Schmidt, H. Schwermer, C. Sguotti, R. Voss, and M. Quaas. 2021. Tipping point realized in cod fishery. *Scientific Reports* 11.
- 1109 Moniz, P. J., and G. B. Pasternack. 2021. Chinook salmon rearing habitat-discharge relationships change as a result of morphodynamic processes. *River Research and Applications* 37:1386-1399.
- 1110 Monk, W. A., N. M. Wilbur, R. A. Curry, R. Gagnon, and R. N. Faux. 2013. Linking landscape variables to cold water refugia in rivers. *Journal of Environmental Management* 118:170-176.
- 1111 Montory, J. A., J. P. Cumillaf, P. Gebauer, M. Urbina, V. M. Cubillos, J. M. Navarro, S. L. Marin, and E. Cruces. 2020. Early development and metabolic rate of the sea louse *Caligus rogercresseyi* under different scenarios of
- 1112 Moore, A., B. Bendall, J. Barry, C. Waring, N. Crooks, and L. Crooks. 2012. River temperature and adult anadromous Atlantic salmon, *Salmo salar*, and brown trout, *Salmo trutta*. *Fisheries Management and Ecology*

- 1113 Moore, J. W., and D. E. Schindler. 2010. Spawning salmon and the phenology of emergence in stream insects. *Proceedings of the Royal Society B-Biological Sciences* 277:1695-1703.
- 1114 Moore, J. W., J. D. Yeakel, D. Peard, J. Lough, and M. Beere. 2014. Life-history diversity and its importance to population stability and persistence of a migratory fish: steelhead in two large North American watersheds.
- 1115 Moore, M. E., and B. A. Berejikian. 2017. Population, habitat, and marine location effects on early marine survival and behavior of Puget Sound steelhead smolts. *Ecosphere* 8.
- 1116 Moore, M. E., B. A. Berejikian, C. M. Greene, and S. Munsch. 2021. Environmental fluctuation and shifting predation pressure contribute to substantial variation in early marine survival of steelhead. *Marine Ecology*
- 1117 Moore, M. E., B. A. Berejikian, F. A. Goetz, A. G. Berger, S. S. Hodgson, E. J. Connor, and T. P. Quinn. 2015. Multi-population analysis of Puget Sound steelhead survival and migration behavior. *Marine Ecology Progress Series*
- 1118 Morales-Marin, L. A., P. Rokaya, P. R. Sanyal, J. Sereda, and K. E. Lindenschmidt. 2019. Changes in streamflow and water temperature affect fish habitat in the Athabasca River basin in the context of climate change. *Ecological*
- 1119 Moran, P., D. J. Teel, M. A. Banks, T. D. Beacham, M. R. Bellinger, S. M. Blankenship, J. R. Candy, J. C. Garza, J. E. Hess, S. R. Narum, L. W. Seeb, W. D. Templin, C. G. Wallace, and C. T. Smith. 2013. Divergent life-history races do not represent Chinook salmon coast-wide: The importance of scale in Quaternary biogeography. *Canadian Journal*
- 1120 Moreira, M., D. S. Hayes, I. Boavida, M. Schletterer, S. Schmutz, and A. Pinheiro. 2018. Ecologically-based criteria for hydropoising mitigation: A review. *Science of the Total Environment* 657:1508-1522.
- 1121 Morgenroth, D., T. McArley, A. Ekstrom, A. Grans, M. Axelsson, and E. Sandblom. 2021. Continuous gastric saline perfusion elicits cardiovascular responses in freshwater rainbow trout (*Oncorhynchus mykiss*). *Journal of Comparative Physiology B-Biochemical Systems and Environmental Physiology*.
- 1122 Morissette, J., S. Swart, T. J. MacCormack, S. Currie, and A. J. Morash. 2021. Thermal variation near the thermal optimum does not affect the growth, metabolism or swimming performance in wild Atlantic salmon (*Salmo salar*).
- 1123 Morita, K. 2019. Earlier migration timing of salmonids: an adaptation to climate change or maladaptation to the fishery? *Canadian Journal of Fisheries and Aquatic Sciences* 76:475-479.
- 1124 Morita, K. 2021. Reverse migration of adult pink salmon (*Oncorhynchus gorbuscha*) to the sea after their return to fresh water. *Environmental Biology of Fishes*.
- 1125 Morita, K., and A. Nakashima. 2015. Temperature seasonality during fry out-migration influences the survival of hatchery-reared chum salmon *Oncorhynchus keta*. *Journal of Fish Biology* 87:1111-1117.
- 1126 Morita, K., and M. A. Fukuwaka. 2020. Intra- and interspecific density-dependent growth and maturation of Pacific salmon in the Bering Sea. *Ecological Research* 35:106-112.
- 1127 Morita, K., and T. Nagasawa. 2010. Latitudinal variation in the growth and maturation of masu salmon (*Oncorhynchus masou*) parr. *Canadian Journal of Fisheries and Aquatic Sciences* 67:955-965.
- 1128 Morita, K., M. Fukuwaka, and N. Tanimata. 2010. Age-related thermal habitat use by Pacific salmon *Oncorhynchus* spp. *Journal of Fish Biology* 77:1024-1029.
- 1129 Morita, K., M. Fukuwaka, N. Tanimata, and O. Yamamura. 2010. Size-dependent thermal preferences in a pelagic
- 1130 Morita, K., T. Tamate, M. Kuroki, and T. Nagasawa. 2014. Temperature-dependent variation in alternative migratory tactics and its implications for fitness and population dynamics in a salmonid fish. *Journal of Animal*
- 1131 Mork, K. A., J. Gilbey, L. P. Hansen, A. J. Jensen, J. A. Jacobsen, M. Holm, J. C. Holst, N. O. Maoileidigh, F. Vikebo, P. McGinnity, W. Melle, K. Thomas, E. Verspoor, and V. Wennevik. 2012. Modelling the migration of post-smolt Atlantic salmon (*Salmo salar*) in the Northeast Atlantic. *Ices Journal of Marine Science* 69:1616-1624.
- 1132 Morley, J. W., R. L. Selden, R. J. Latour, T. L. Frölicher, R. J. Seagraves, and M. L. Pinsky. 2018. Projecting shifts in thermal habitat for 686 species on the North American continental shelf. *Plos One* 13:e0196127.
- 1133 Morley, N. J., and J. W. Lewis. 2014. Extreme climatic events and host-pathogen interactions: The impact of the 1976 drought in the UK. *Ecological Complexity* 17:1-19.
- 1134 Morley, S. A., M. M. Foley, J. J. Duda, M. M. Beirne, R. L. Paradis, R. C. Johnson, M. L. McHenry, M. Elofson, E. M. Sampson, R. E. McCoy, J. Stapleton, and G. R. Pess. 2020. Shifting food web structure during dam removal—Disturbance and recovery during a major restoration action. *Plos One* 15:e0239198.
- 1135 Morrice, K. J., A. M. Baptista, and B. J. Burke. 2020. Environmental and behavioral controls on juvenile Chinook salmon migration pathways in the Columbia River estuary. *Ecological Modelling* 427.
- 1136 Morton, C., D. Knowler, C. Brugere, D. Lymer, and D. Bartley. 2017. Valuation of fish production services in river basins: A case study of the Columbia River. *Ecosystem Services* 24:101-113.
- 1137 Moses, A. P., B. A. Staton, and N. J. Smith. 2019. Migratory Timing and Rates of Chinook Salmon Bound for the Kwethluk and Kisaralik Rivers. *Journal of Fish and Wildlife Management* 10:419-431.

- 1138 Mosser, C. M., L. C. Thompson, and J. S. Strange. 2013. Survival of captured and relocated adult spring-run Chinook salmon *Oncorhynchus tshawytscha* in a Sacramento River tributary after cessation of migration.
- 1139 Mostofa, K. M. G., C. Q. Liu, W. D. Zhai, M. Minella, D. Vione, K. S. Gao, D. Minakata, T. Arakaki, T. Yoshioka, K. Hayakawa, E. Konohira, E. Tanoue, A. Akhand, A. Chanda, B. L. Wang, and H. Sakugawa. 2016. Reviews and Syntheses: Ocean acidification and its potential impacts on marine ecosystems. *Biogeosciences* 13:1767-1786.
- 1140 Mottola, G., T. Kristensen, and K. Anttila. 2020. Compromised thermal tolerance of cardiovascular capacity in upstream migrating Arctic char and brown trout-are hot summers threatening migrating salmonids? *Conservation*
- 1141 Motyka, R., T. Norin, L. H. Petersen, D. B. Huggett, and A. K. Gamperl. 2017. Long-term hypoxia exposure alters the cardiorespiratory physiology of steelhead trout (*Oncorhynchus mykiss*), but does not affect their upper
- 1142 Moullec, F., N. Barrier, S. Drira, F. Guilhaumon, T. Hattab, M. A. Peck, and Y.-J. Shin. 2022. Using species distribution models only may underestimate climate change impacts on future marine biodiversity. *Ecological*
- 1143 Moyle, P., J. Kiernan, P. Crain, and R. Quiñones. 2013. Climate Change Vulnerability of Native and Alien Freshwater Fishes of California: A Systematic Assessment Approach. *Plos One* 8:e63883.
- 1144 Muhlfeld, C. C., R. P. Kovach, L. A. Jones, R. Al-Chokhachy, M. C. Boyer, R. F. Leary, W. H. Lowe, G. Luikart, and F. W. Allendorf. 2014. Invasive hybridization in a threatened species is accelerated by climate change. *Nature*
- 1145 Muhling, B., S. Brodie, J. Smith, D. Tommasi, C. Gaitan, E. L. Hazen, M. G. Jacox, T. D. Auth, and R. D. Brodeur. 2020. Predictability of species distributions deteriorates under novel environmental conditions in the California
- 1146 Muir, C. A., B. D. Neff, and S. Damjanovski. 2021. Adaptation of a mouse Doppler echocardiograph system for assessing cardiac function and thermal performance in a juvenile salmonid. *Conservation Physiology* 9.
- 1147 Mulder, I. M., C. J. Morris, J. B. Dempson, I. A. Fleming, and M. Power. 2020. Marine temperature and depth use by anadromous Arctic char correlates to body size and diel period. *Canadian Journal of Fisheries and Aquatic*
- 1148 Muller, S., C. A. M. E. Wilson, P. Ouro, and J. Cable. 2021. Experimental Investigation of Physical Leaky Barrier Design Implications on Juvenile Rainbow Trout (*Oncorhynchus mykiss*) Movement. *Water Resources Research* 57.
- 1149 Munday, P. L., D. L. Dixon, J. M. Donelson, G. P. Jones, M. S. Pratchett, G. V. Devitsina, and K. B. Doving. 2009. Ocean acidification impairs olfactory discrimination and homing ability of a marine fish. *Proceedings of the*
- 1150 Munday, P. L., D. L. Dixon, M. I. McCormick, M. Meekan, M. C. O. Ferrari, and D. P. Chivers. 2010. Replenishment of fish populations is threatened by ocean acidification. *Proceedings of the National Academy of Sciences of the*
- 1151 Munday, P. L., M. Gagliano, J. M. Donelson, D. L. Dixon, and S. R. Thorrold. 2011. Ocean acidification does not affect the early life history development of a tropical marine fish. *Marine Ecology-Progress Series* 423:211-221.
- 1152 Munday, P. L., N. E. Crawley, and G. E. Nilsson. 2009. Interacting effects of elevated temperature and ocean acidification on the aerobic performance of coral reef fishes. *Marine Ecology-Progress Series* 388:235-242.
- 1153 Munday, P. L., V. Hernaman, D. L. Dixon, and S. R. Thorrold. 2011. Effect of ocean acidification on otolith development in larvae of a tropical marine fish. *Biogeosciences* 8:1631-1641.
- 1154 Mundy, P. R., and D. F. Evenson. 2011. Environmental controls of phenology of high-latitude Chinook salmon populations of the Yukon River, North America, with application to fishery management. *Ices Journal of Marine*
- 1155 Muñoz, N. J., A. P. Farrell, J. W. Heath, and B. D. Neff. 2015. Adaptive potential of a Pacific salmon challenged by climate change. *Nature Climate Change* 5:163-166.
- 1156 Munoz, N. J., J. D. Reynolds, J. W. Moore, and B. D. Neff. 2019. Salmon in clear and present danger. *Science*
- 1157 Muñoz, N. J., K. Anttila, Z. Chen, J. W. Heath, A. P. Farrell, and B. D. Neff. 2014. Indirect genetic effects underlie oxygen-limited thermal tolerance within a coastal population of chinook salmon. *Proceedings of the Royal Society*
- 1158 Munsch, S. H., C. M. Greene, R. C. Johnson, W. H. Satterthwaite, H. Imaki, and P. L. Brandes. 2019. Warm, dry winters truncate timing and size distribution of seaward-migrating salmon across a large, regulated watershed.
- 1159 Munsch, S. H., C. M. Greene, R. C. Johnson, W. H. Satterthwaite, H. Imaki, P. L. Brandes, and M. R. O'Farrell. 2020. Science for integrative management of a diadromous fish stock: interdependencies of fisheries, flow, and habitat restoration. *Canadian Journal of Fisheries and Aquatic Sciences* 77:1487-1504.
- 1160 Munsch, S. H., K. S. Andrews, L. G. Crozier, R. Fonner, J. L. Gosselin, C. M. Greene, C. J. Harvey, J. I. Lundin, G. R. Pess, J. F. Samhoury, and W. H. Satterthwaite. 2020. Potential for ecological nonlinearities and thresholds to
- 1161 Murauskas, J., K. Hyatt, J. Fryer, E. Koontz, S. Folks, R. Bussanich, and K. Shelby. 2021. Migration and survival of Okanagan River Sockeye Salmon *Oncorhynchus nerka*, 2012-2019. *Animal Biotelemetry* 9.
- 1162 Murdoch, A., C. Mantyka-Pringle, and S. Sharma. 2020. Impacts of co-occurring environmental changes on Alaskan stream fishes. *Freshwater Biology* 65:1685-1701.
- 1163 Murphy, C. A., C. S. Lee, B. Johnson, I. Arismendi, and S. L. Johnson. 2020. GrowChinook: an optimized multimodel and graphic user interface for predicting juvenile Chinook salmon growth in lentic ecosystems. *Canadian Journal*

- 1164 Murphy, C. A., S. L. Johnson, W. Gerth, T. Pierce, and G. Taylor. 2021. Unintended Consequences of Selective Water Withdrawals From Reservoirs Alter Downstream Macroinvertebrate Communities. *Water Resources*
- 1165 Murphy, C. A., W. Gerth, and I. Arismendi. 2020. Hatching and survival of the salmon 'gill maggot'*Salmincola californiensis*(Copepoda: Lernaepodidae) reveals thermal dependence and undocumented naupliar stage.
- 1166 Murphy, J. M., K. G. Howard, J. C. Gann, K. C. Cieciel, W. D. Templin, and C. M. Guthrie. 2017. Juvenile Chinook Salmon abundance in the northern Bering Sea: Implications for future returns and fisheries in the Yukon River.
- 1167 Mustonen, T., and B. Van Dam. 2021. Climate Change and Unalakleet: A Deep Analysis. *Sustainability* 13.
- 1168 Myers, B. J. E., A. J. Lynch, D. B. Bunnell, C. Chu, J. A. Falke, R. P. Kovach, T. J. Krabbenhoft, T. J. Kwak, and C. P. Paukert. 2017. Global synthesis of the documented and projected effects of climate change on inland fishes.
- 1169 Myrvold, K. M., and B. P. Kennedy. 2017. Size and growth relationships in juvenile steelhead: The advantage of large relative size diminishes with increasing water temperatures. *Environmental Biology of Fishes* 100:1373-1382.
- 1170 Myrvold, K. M., and B. P. Kennedy. 2018. Increasing water temperatures exacerbate the potential for density dependence in juvenile steelhead. *Canadian Journal of Fisheries and Aquatic Sciences* 75:897-907.
- 1171 Myrvold, K. M., and B. P. Kennedy. 2019. Seasonal variation in growth, consumption and growth efficiency in overwintering juvenile steelhead. *Ecology of Freshwater Fish*:15.
- 1172 Nadeau, P. S., S. G. Hinch, K. A. Hruska, L. B. Pon, and D. A. Patterson. 2010. The effects of experimental energy depletion on the physiological condition and survival of adult sockeye salmon (*Oncorhynchus nerka*) during
- 1173 Naik, P. K., and D. A. Jay. 2011. Distinguishing human and climate influences on the Columbia River: Changes in mean flow and sediment transport. *Journal of Hydrology* 404:259-277.
- 1174 Naik, P. K., and D. A. Jay. 2011. Human and climate impacts on Columbia River hydrology and salmonids. *River Research and Applications* 27:1270-1276.
- 1175 Nakamura, S., N. Kaneko, T. Nonaka, D. Kurita, Y. Miyakoshi, and M. Shimizu. 2019. Fasting in freshwater severely affects growth of juvenile chum salmon when entering cold seawater. *Fisheries Science* 85:655-665.
- 1176 Naman, S. M., J. S. Rosenfeld, E. Jordison, M. Kuzyk, and B. C. Eaton. 2020. Exploitation of Velocity Gradients by Sympatric Stream Salmonids: Basic Insights and Implications for Instream Flow Management. *North American*
- 1177 Naman, S. M., J. S. Rosenfeld, J. R. Neuswanger, E. C. Enders, and B. C. Eaton. 2019. Comparing correlative and bioenergetics-based habitat suitability models for drift-feeding fishes. *Freshwater Biology* 64:1613-1626.
- 1178 Naman, S. M., J. S. Rosenfeld, J. R. Neuswanger, E. C. Enders, J. W. Hayes, E. O. Goodwin, I. G. Jowett, and B. C. Eaton. 2020. Bioenergetic Habitat Suitability Curves for Instream Flow Modeling: Introducing User-Friendly
- 1179 Narum, S. R., and N. R. Campbell. 2015. Transcriptomic response to heat stress among ecologically divergent populations of redband trout. *Bmc Genomics* 16.
- 1180 Narum, S. R., N. R. Campbell, C. C. Kozfkey, and K. A. Meyer. 2010. Adaptation of redband trout in desert and montane environments. *Molecular Ecology* 19:4622-4637.
- 1181 Narum, S. R., N. R. Campbell, K. A. Meyer, M. R. Miller, and R. W. Hardy. 2013. Thermal adaptation and acclimation of ectotherms from differing aquatic climates. *Molecular Ecology* 22:3090-3097.
- 1182 Naughton, G. P., M. L. Keefer, T. S. Clabough, M. J. Knoff, T. J. Blubaugh, and C. C. Caudill. 2018. Tag effects on prespawn mortality of Chinook salmon: A field experiment using passive integrated transponder tags, radio transmitters, and untagged controls. *North American Journal of Fisheries Management* 38:96-103.
- 1183 Naughton, G. P., M. L. Keefer, T. S. Clabough, M. J. Knoff, T. J. Blubaugh, C. Sharpe, and C. C. Caudill. 2018. Reservoir provides cool-water refuge for adult Chinook salmon in a trap-and-haul reintroduction program. *Marine*
- 1184 NCADAC. 2013. National Climate Assessment and Development Advisory Committee. Third National Climate Assessment Draft Report, <http://www.globalchange.gov/>.
- 1185 Neal, T., M. L. Kent, J. Sanders, C. B. Schreck, and J. T. Peterson. 2021. Laboratory infection rates and associated mortality of juvenile Chinook Salmon (*Oncorhynchus tshawytscha*) from parasitic copepod (*Salmincola*
- 1186 Neher, T. D. H., A. E. Rosenberger, C. E. Zimmerman, C. M. Walker, and S. J. Baird. 2014. Use of glacier river-fed estuary channels by juvenile Coho Salmon: transitional or rearing habitats? *Environmental Biology of Fishes*
- 1187 Nehring, R. B., B. Hancock, M. Catanese, M. E. T. Stinson, D. Winkelman, J. Wood, and J. Epp. 2013. Reduced *Myxobolus cerebralis* Actinospore production in a Colorado reservoir may be linked to changes in *Tubifex tubifex*
- 1188 Nelson, B. W., A. O. Shelton, J. H. Anderson, M. J. Ford, and E. J. Ward. 2019. Ecological implications of changing hatchery practices for Chinook salmon in the Salish Sea. *Ecosphere* 10:e02922. 02910.01002/ecs02922.02922.
- 1189 Neupane, S., and E. M. Yager. 2013. Numerical simulation of the impact of sediment supply and streamflow variations on channel grain sizes and Chinook salmon habitat in mountain drainage networks. *Earth Surface*



- 1190 Neuswanger, J. R., M. S. Wipfli, M. J. Evenson, N. F. Hughes, and A. E. Rosenberger. 2015. Low productivity of Chinook salmon strongly correlates with high summer stream discharge in two Alaskan rivers in the Yukon
- 1191 Neville, H. M., D. R. Leasure, D. C. Dauwalter, J. B. Dunham, R. Bjork, K. A. Fesenmyer, N. D. Chelgren, M. M. Peacock, C. H. Luce, D. J. Isaak, L. A. Carranza, J. Sjoberg, and S. J. Wenger. 2019. Application of multiple-population viability analysis to evaluate species recovery alternatives. *Conservation Biology* 34:482-493.
- 1192 Nguyen, D. T., D. Marancik, C. Ware, M. J. Griffin, and E. Soto. 2021. *Mycobacterium salmoniphilum* and *M. chelonae* in Captive Populations of Chinook Salmon. *Journal of Aquatic Animal Health* 33:107-115.
- 1193 Nichols, A. L., A. D. Willis, C. A. Jeffres, and M. L. Deas. 2014. Water temperature patterns below large groundwater springs: mangement impliations for coho salmon in the Shasta River, California. *River Research and*
- 1194 Nicol, C. L., J. C. Jorgensen, C. B. Fogel, B. Timpane-Padgham, and T. J. Beechie. 2022. Spatially overlapping salmon species have varied population response to early life history mortality from increased peak flows. *Canadian*
- 1195 Nicol, S. 2008. Krill face shell shock. *Unitas* 324:1.
- 1196 Nicola, G. G., B. Elvira, B. Jonsson, D. Ayllon, and A. Almodovar. 2018. Local and global climatic drivers of Atlantic salmon decline in southern Europe. *Fisheries Research* 198:78-85.
- 1197 Nieland, J. L., and T. F. Sheehan. 2020. Quantifying the Effects of Dams on Atlantic Salmon in the Penobscot River Watershed, with a Focus on Weldon Dam.
- 1198 Nielsen, J. L., G. T. Ruggerone, and C. E. Zimmerman. 2013. Adaptive strategies and life history characteristics in a warming climate: Salmon in the Arctic? *Environmental Biology of Fishes* 96:1187-1226.
- 1199 Niemeyer, R. J., K. D. Bladon, and R. D. Woodsmith. 2020. Long-term hydrologic recovery after wildfire and post-fire forest management in the interior Pacific Northwest. *Hydrological Processes* 34.
- 1200 Nikinmaa, M. 2013. Climate change and ocean acidification interactions with aquatic toxicology. *Aquatic*
- 1201 Nilsen, E. B., W. B. Hapke, B. McIlraith, and D. Markovchick. 2015. Reconnaissance of contaminants in larval Pacific lamprey (*Entosphenus tridentatus*) tissues and habitats in the Columbia River Basin, Oregon and Washington,
- 1202 Nisbet, R. M., M. Jusup, T. Klanjscek, and L. Pecquerie. 2012. Integrating dynamic energy budget (DEB) theory with traditional bioenergetic models. *Journal of Experimental Biology* 215:892-902.
- 1203 Nisembaum, L. G., P. Martin, F. Lecomte, and J. Falcon. 2021. Melatonin and osmoregulation in fish: A focus on Atlantic salmon *Salmo salar* smoltification. *Journal of Neuroendocrinology* 33.
- 1204 Nisembaum, L. G., P. Martin, M. Fuentes, L. Besseau, E. Magnanou, S. D. McCormick, and J. Falcon. 2020. Effects of a temperature rise on melatonin and thyroid hormones during smoltification of Atlantic salmon, *Salmo salar*. *Journal of Comparative Physiology B-Biochemical Systems and Environmental Physiology* 190:731-748.
- 1205 NMFS (National Marine Fisheries Service) ; NWFS (Northwest Fisheries Science Center).
- 1206 NMFS, National Marine Fisheries Service. 2016. 2015 adult sockeye salmon passage report. Available at [http://www.westcoast.fisheries.noaa.gov/publications/hydropower/fcrps/2015\\_adult\\_sockeye\\_salmon\\_passage\\_](http://www.westcoast.fisheries.noaa.gov/publications/hydropower/fcrps/2015_adult_sockeye_salmon_passage_)
- 1207 NMFS, National Marine Fisheries Service. 2020. Endangered Species Act (ESA) Section 7(a)(2) Biological Opinion and Conference Opinion Consultation on Implementation of the Pacific Fishery Management Council Salmon
- 1208 NMFS, National Marine Fisheries Service. 2020. Endangered Species Act Section 7(a)(2) Biological Opinion and Magnuson-Stevens Fishery Conservation and Management Act Essential Fish Habitat Consultation. Consultation for the Continued Operation and Maintenance of the Columbia River System. NMFS, Portland, Oregon. Available
- 1209 NMFS, National Marine Fisheries Service. 2020. FINAL REPORT AND RECOMMENDATIONS. <https://www.fisheries.noaa.gov/west-coast/marine-mammal-protection/marine-mammal-protection-act-section->
- 1210 Nobata, S., T. Kitagawa, S. Houki, M. Ito, Y. Aoki, K. Sato, and S. Hyodo. 2021. Relationships between maturational status and migration behavior of homing chum salmon *Oncorhynchus keta* in inner bays of the Sanriku coast.
- 1211 Nobriga, M. L., C. J. Michel, R. C. Johnson, and J. D. Wikert. 2021. Coldwater fish in a warm water world: Implications for predation of salmon smolts during estuary transit. *Ecology and Evolution* 11:10381-10395.
- 1212 Norman, S. A., R. C. Hobbs, L. A. Beckett, S. J. Trumble, and W. A. Smith. 2020. Relationship between per capita births of Cook Inlet belugas and summer salmon runs: age-structured population modeling. *Ecosphere* 11.
- 1213 Northwest Fisheries Science Center. 2020. Status review update for Pacific salmon and steelhead listed under the Endangered Species Act: Pacific Northwest.
- 1214 Notch, J. J., A. S. McHuron, C. J. Michel, F. Cordoleani, M. Johnson, M. J. Henderson, and A. J. Ammann. 2020. Outmigration survival of wild Chinook salmon smolts through the Sacramento River during historic drought and
- 1215 Noyes, P. D., M. K. McElwee, H. D. Miller, B. W. Clark, L. A. Van Tiem, K. C. Walcott, K. N. Erwin, and E. D. Levin. 2009. The toxicology of climate change: Environmental contaminants in a warming world. *Environment*

- 1216 NRC, National Research Council. 2012. Sea-Level Rise for the Coasts of California, Oregon, and Washington: Past, Present, and Future. The National Academies Press Available at: <http://www.nationalacademies.org/nrc/>.
- 1217 Nudds, R. L., K. Ozolina, M. Fenkes, O. H. Wearing, and H. A. Shiels. 2020. Extreme temperature combined with hypoxia, affects swimming performance in brown trout (*Salmo trutta*). *Conservation Physiology* 8.
- 1218 Null, S. E., and J. R. Lund. 2012. Fish habitat optimization to prioritize river restoration decisions. *River Research*
- 1219 Null, S. E., M. L. Deas, and J. R. Lund. 2010. Flow and water temperature simulation for habitat restoration in the Shasta River, California. *River Research and Applications* 26:663-681.
- 1220 Null, S. E., S. T. Ligare, and J. H. Viers. 2013. A method to consider whether dams mitigate climate change effects on stream temperatures. *Journal of the American Water Resources Association* 49:1456-1472.
- 1221 O'Briain, R., S. Shephard, R. Matson, P. Gordon, and F. L. Kelly. 2020. The efficacy of riparian tree cover as a climate change adaptation tool is affected by hydromorphological alterations. *Hydrological Processes* 34:2433-
- 1222 O'Donnell, M. J., A. M. Regish, S. D. McCormick, and B. H. Letcher. 2020. How repeatable is CTmax within individual brook trout over short- and long-time intervals? *Journal of Thermal Biology* 89.
- 1223 O'Farrel, M., R. Kope, W. Beeghley, C. Foster, S. Haeseker, L. Lavoy, and A. Letvin. 2017. Review of 2017 salmon ocean fisheries: Stock assesment and fishery evaluation document for the Pacific coast salmon fishery
- 1224 O'Keeffe, J., M. Piniewski, M. Szczesniak, P. Oglecki, P. Parasiewicz, and T. Okruszko. 2019. Index-based analysis of climate change impact on streamflow conditions important for Northern Pike, Chub and Atlantic salmon. *Fisheries*
- 1225 O'Malley, K. G., D. P. Jacobson, R. Kurth, A. J. Dill, and M. A. Banks. 2013. Adaptive genetic markers discriminate migratory runs of Chinook salmon (*Oncorhynchus tshawytscha*) amid continued gene flow. *Evolutionary*
- 1226 O'Malley, K. G., M. J. Ford, and J. J. Hard. 2010. Clock polymorphism in Pacific salmon: Evidence for variable selection along a latitudinal gradient. *Proceedings of the Royal Society B-Biological Sciences* 277:3703-3714.
- 1227 O'Sullivan, A. M., E. Corey, R. A. Cunjak, T. Linnansaari, and R. A. Curry. 2021. Salmonid thermal habitat contraction in a hydrogeologically complex setting. *Ecosphere* 12.
- 1228 O'Sullivan, A. M., K. J. Devito, J. Ogilvie, T. Linnansaari, T. Pronk, S. Allard, and R. A. Curry. 2020. Effects of Topographic Resolution and Geologic Setting on Spatial Statistical River Temperature Models. *Water Resources*
- 1229 O'Sullivan, A. M., K. M. Samways, A. Perreault, C. Hernandez, M. D. Gautreau, R. A. Curry, and L. Bernatchez. 2020. Space invaders: Searching for invasive Smallmouth Bass (*Micropterus dolomieu*) in a renowned Atlantic Salmon
- 1230 O'Sullivan, A. M., T. Linnansaari, J. Leavitt, K. M. Samways, B. L. Kurylyk, and R. A. Curry. 2022. The salmon-peloton: Hydraulic habitat shifts of adult Atlantic salmon (*Salmo salar*) due to behavioural thermoregulation. *River*
- 1231 O'Toole, C., E. Weigum, C. T. Graham, P. White, K. Samways, B. Hayden, and D. Brophy. 2020. Acid treatment of Atlantic salmon (*Salmo salar*) scales prior to analysis has negligible effects on delta(13)C and delta(15)N isotope
- 1232 Obedzinski, M., S. N. Pierce, G. E. Horton, and M. J. Deitch. 2018. Effects of flow-related variables on oversummer survival of juvenile Coho salmon in intermittent streams. *Transactions of the American Fisheries Society* 147:588-
- 1233 Ocalewicz, K., A. Gurgul, M. Polonis, and S. Dobosz. 2020. Preliminary Identification of Candidate Genes Related to Survival of Gynogenetic Rainbow Trout (*Oncorhynchus mykiss*) Based on Comparative Transcriptome Analysis.
- 1234 Ohlberger, J., E. J. Ward, D. E. Schindler, and B. Lewis. 2018. Demographic changes in Chinook salmon across the Northeast Pacific Ocean. *Fish and Fisheries* 19:533-546.
- 1235 Ohlberger, J., E. J. Ward, R. E. Brenner, M. E. Hunsicker, S. B. Haught, D. Finnoff, M. A. Litzow, T. Schwoerer, G. T. Ruggerone, and C. Hauri. 2021. Non-stationary and interactive effects of climate and competition on pink salmon
- 1236 Ohlberger, J., T. W. Buehrens, S. J. Brenkman, P. Crain, T. P. Quinn, and R. Hilborn. 2018. Effects of past and projected river discharge variability on freshwater production in an anadromous fish. *Freshwater Biology* 63:331-
- 1237 Oikawa, J., S. Nakamura, N. Kaneko, M. Torao, Y. Koshino, and M. Shimizu. 2021. Effects of fasting and water temperatures during transition from freshwater to seawater on juvenile chum salmon growth and metabolism.
- 1238 Ojima, N., M. Mekuchi, T. Ineno, K. Tamaki, A. Kera, S. Kinoshita, S. Asakawa, and S. Watabe. 2012. Differential expression of heat-shock proteins in F2 offspring from F1 hybrids produced between thermally selected and
- 1239 Okasaki, C., M. L. Keefer, P. A. H. Westley, and A. M. Berdahl. 2020. Collective navigation can facilitate passage through human-made barriers by homeward migrating Pacific salmon. *Proceedings of the Royal Society B-*
- 1240 Oke, K. B., C. J. Cunningham, P. A. H. Westley, M. L. Baskett, S. M. Carlson, J. Clark, A. P. Hendry, V. A. Karatayev, N. W. Kendall, J. Kibele, H. K. Kindsvater, K. M. Kobayashi, B. Lewis, S. Munch, J. D. Reynolds, G. K. Vick, and E. P. Palkovacs. 2020. Recent declines in salmon body size impact ecosystems and fisheries. *Nature Communications*
- 1241 Oke, K. B., C. J. Cunningham, T. P. Quinn, and A. P. Hendry. 2019. Independent lineages in a common environment: the roles of determinism and contingency in shaping the migration timing of even- versus odd-year pink salmon over broad spatial and temporal scales. *Ecology Letters* 22:1547-1556.

- 1242 Okey, T. A., H. M. Alidina, V. Lo, and S. Jessen. 2014. Effects of climate change on Canada's Pacific marine ecosystems: a summary of scientific knowledge. *Reviews in Fish Biology and Fisheries* 24:519-559.
- 1243 Oku, H., M. Tokuda, H. Matsunari, H. Furuita, K. Murashita, and T. Yamamoto. 2014. Characterization of differentially expressed genes in liver in response to the rearing temperature of rainbow trout *Oncorhynchus mykiss* and their heritable differences. *Fish Physiology and Biochemistry* 40:1757-1769.
- 1244 Olivetti, S., M. A. Gil, V. K. Sridharan, and A. M. Hein. 2021. Merging computational fluid dynamics and machine learning to reveal animal migration strategies. *Methods in Ecology and Evolution* 12:1186-1200.
- 1245 Olmos, M., F. Massiot-Granier, E. Prevost, G. Chaput, I. R. Bradbury, M. Nevoux, and E. Rivot. 2019. Evidence for spatial coherence in time trends of marine life history traits of Atlantic salmon in the North Atlantic. *Fish and*
- 1246 Olmos, M., M. R. Payne, M. Nevoux, E. Prevost, G. Chaput, H. Du Pontavice, J. Guitton, T. Sheehan, K. Mills, and E. Rivot. 2020. Spatial synchrony in the response of a long range migratory species (*Salmo salar*) to climate change in
- 1247 Olsen, J. B., P. Walsh, A. M. Benson, C. J. Schwanke, and J. K. Wenburg. 2021. Genetic Divergence and Diversity Reflect a Predominant Freshwater Resident Life History in Rainbow Trout from Southwestern Alaska. *Transactions*
- 1248 Onukwufor, J. O., and C. M. Wood. 2020. Reverse translation: effects of acclimation temperature and acute temperature challenges on oxygen consumption, diffusive water flux, net sodium loss rates,  $Q_{10}$  values and mass scaling coefficients in the rainbow trout (*Oncorhynchus mykiss*). *Journal of Comparative Physiology B-*
- 1249 Orlando, P., S. Silvestri, I. Cirilli, F. Marcheggiani, G. Falcioni, M. Cantarini, R. Galeazzi, and L. Tiano. 2021. Involvement of different hemoprotein thiol groups of *Oncorhynchus mykiss* in cadmium toxicity. *Journal of Trace*
- 1250 Orpwood, J. E., J. D. Armstrong, and S. W. Griffiths. 2010. Interactions between riparian shading and food supply: A seasonal comparison of effects on time budgets, space use and growth in Atlantic salmon *Salmo salar*. *Journal of*
- 1251 Osborne, E. B., R. C. Thunell, N. Gruber, R. A. Feely, and C. R. Benitez-Nelson. 2020. Decadal variability in twentieth-century ocean acidification in the California Current Ecosystem. *Nature Geoscience* 13:43-49.
- 1252 Osterback, A. M. K., C. H. Kern, E. A. Kanawi, J. M. Perez, and J. D. Kiernan. 2018. The effects of early sandbar formation on the abundance and ecology of coho salmon (*Oncorhynchus kisutch*) and steelhead trout (*Oncorhynchus mykiss*) in a central California coastal lagoon. *Canadian Journal of Fisheries and Aquatic Sciences*
- 1253 Ostergren, J., S. Palm, J. Gilbey, G. Spong, J. Dannewitz, H. Konigsson, J. Persson, and A. Vasemagi. 2021. A century of genetic homogenization in Baltic salmon-evidence from archival DNA. *Proceedings of the Royal Society B-*
- 1254 Otero, J., A. J. Jensen, J. H. L'Abée-Lund, N. C. Stenseth, G. O. Storvik, and L. A. Vollestad. 2011. Quantifying the ocean, freshwater and human effects on year-to-year variability of one-sea-winter Atlantic salmon angled in
- 1255 Otero, J., A. J. Jensen, J. H. L'Abée-Lund, N. C. Stenseth, G. O. Storvik, and L. A. Vollestad. 2012. Contemporary ocean warming and freshwater conditions are related to later sea age at maturity in Atlantic salmon spawning in
- 1256 Otero, J., J. H. L'Abée-Lund, T. Castro-Santos, K. Leonardsson, G. O. Storvik, B. Jonsson, B. Dempson, I. C. Russell, A. J. Jensen, J.-L. Bagliniere, M. Dionne, J. D. Armstrong, A. Romakkaniemi, B. H. Letcher, J. F. Kocik, J. Erkinaro, R. Poole, G. Rogan, H. Lundqvist, J. C. MacLean, E. Jokikokko, J. V. Arnekleiv, R. J. Kennedy, E. Niemela, P. Caballero, P. A. Music, T. Antonsson, S. Gudjonsson, A. E. Veselov, A. Lamberg, S. Groom, B. H. Taylor, M. Taberner, M. Dillane, F. Arnason, G. Horton, N. A. Hvidsten, I. R. Jonsson, N. Jonsson, S. McKelvey, T. F. Naesje, O. Skaala, G. W. Smith, H. Saegrov, N. C. Stenseth, and L. A. Vollestad. 2014. Basin-scale phenology and effects of climate
- 1257 Ottersen, G., S. Kim, G. Huse, J. J. Polovina, and N. C. Stenseth. 2010. Major pathways by which climate may force marine fish populations. *Journal of Marine Systems* 79:343-360.
- 1258 Ou, M., T. J. Hamilton, J. Eom, E. M. Lyall, J. Gallup, A. Jiang, J. Lee, D. A. Close, S. S. Yun, and C. J. Brauner. 2015. Responses of pink salmon to CO<sub>2</sub>-induced aquatic acidification. *Nature Climate Change* 5:950-+.
- 1259 Ouellet, V., A. St-Hilaire, S. J. Dugdale, D. M. Hannah, S. Krause, and S. Proulx-Ouellet. 2020. River temperature research and practice: Recent challenges and emerging opportunities for managing thermal habitat conditions in
- 1260 Ouellet, V., M. Mingelbier, A. Saint-Hilaire, and J. Morin. 2010. Frequency analysis as a tool for assessing adverse conditions during a massive fish kill in the St. Lawrence River, Canada. *Water Quality Research Journal of Canada*
- 1261 Ovaskainen, O., and B. Meerson. 2010. Stochastic models of population extinction. *Trends in Ecology & Evolution*
- 1262 Overland, J. E. 2021. Causes of the Record-Breaking Pacific Northwest Heatwave, Late June 2021. *Atmosphere* 12.
- 1263 Ovidio, M., S. Renardy, A. Dierckx, B. N. Matondo, and J. P. Benitez. 2021. Improving bypass performance and passage success of Atlantic salmon smolts at an old fish-hostile hydroelectric power station: a challenging task.
- 1264 Pacific Fishery Management Council. 2016. Preseason report 1 stock abundance analysis and environmental assessment Part 1 for 2016 ocean salmon fishery regulations. Regulation identifier number 0648-BF56. Available at [http://www.pcouncil.org/wp-content/uploads/2016/03/Preseason\\_Report\\_I\\_2016\\_FINAL03012016.pdf](http://www.pcouncil.org/wp-content/uploads/2016/03/Preseason_Report_I_2016_FINAL03012016.pdf).

- 1265 Padilla, A., K. Rasouli, and S. J. Dery. 2015. Impacts of variability and trends in runoff and water temperature on salmon migration in the Fraser River Basin, Canada. *Hydrological Sciences Journal-Journal Des Sciences*
- 1266 Paez, D. J., R. L. Powers, P. Jia, N. Ballesteros, G. Kurath, K. A. Naish, and M. K. Purcell. 2021. Temperature Variation and Host Immunity Regulate Viral Persistence in a Salmonid Host. *Pathogens* 10.
- 1267 Pandey, A., M. Rajesh, P. Baral, D. Sarma, P. H. Tripathi, M. S. Akhtar, A. Ciji, M. K. Dubey, V. Pande, P. Sharma, and B. S. Kamalam. 2021. Concurrent changes in thermal tolerance thresholds and cellular heat stress response reveals novel molecular signatures and markers of high temperature acclimation in rainbow trout. *Journal of*
- 1268 Pankhurst, N. W., and H. R. King. 2010. Temperature and salmonid reproduction: Implications for aquaculture.
- 1269 Pankhurst, N. W., and P. L. Munday. 2011. Effects of climate change on fish reproduction and early life history stages. *Marine and Freshwater Research* 62:1015-1026.
- 1270 Parasiewicz, P., E. L. King, J. A. Webb, M. Piniewski, C. Comoglio, C. Wolter, A. D. Buijse, D. Bjerklie, P. Vezza, A. Melcher, and K. Suska. 2019. The role of floods and droughts on riverine ecosystems under a changing climate.
- 1271 Pardo, S. A., G. H. Bolstad, J. B. Dempson, J. April, R. A. Jones, D. Raab, and J. A. Hutchings. 2021. Trends in marine survival of Atlantic salmon populations in eastern Canada. *Ices Journal of Marine Science* 78:2460-2473.
- 1272 Parra, I., A. Almodovar, D. Ayllon, G. G. Nicola, and B. Elvira. 2012. Unravelling the effects of water temperature and density dependence on the spatial variation of brown trout (*Salmo trutta*) body size. *Canadian Journal of*
- 1273 Parry, E. S., S. D. Gregory, R. B. Lauridsen, and S. W. Griffiths. 2018. The effects of flow on Atlantic salmon (*Salmo salar*) redd distribution in a UK chalk stream between 1980 and 2015. *Ecology of Freshwater Fish* 27:128-137.
- 1274 Pascal, P. Y., J. W. Fleeger, F. Galvez, and K. R. Carman. 2010. The toxicological interaction between ocean acidity and metals in coastal meiobenthic copepods. *Marine Pollution Bulletin* 60:2201-2208.
- 1275 Pasquet, A., E. Realis-Doyelle, P. Fontaine, and F. Teletchea. 2019. What can we learn by studying dead fish fry?
- 1276 Patterson, A. C., A. G. Strang, and K. C. Abbott. 2021. When and Where We Can Expect to See Early Warning Signals in Multispecies Systems Approaching Tipping Points: Insights from Theory. *American Naturalist* 198:E12-
- 1277 Payton, Q., N. J. Hostetter, and A. F. Evans. 2019. Jointly estimating survival and mortality: integrating recapture and recovery data from complex multiple predator systems. *Environmental and Ecological Statistics* 26:107-125.
- 1278 Peacock, S. J., E. Hertz, C. A. Holt, B. Connors, C. Freshwater, and K. Connors. 2020. Evaluating the consequences of common assumptions in run reconstructions on Pacific salmon biological status assessments. *Canadian Journal*
- 1279 Pearse, D. E., and M. A. Campbell. 2018. Ancestry and adaptation of rainbow trout in Yosemite National Park.
- 1280 Pecl, G. T., E. Ogier, S. Jennings, I. van Putten, C. Crawford, H. Fogarty, S. Frusher, A. J. Hobday, J. Keane, E. Lee, C. MacLeod, C. Mundy, J. Stuart-Smith, and S. Tracey. 2019. Autonomous adaptation to climate-driven change in marine biodiversity in a global marine hotspot. *Ambio* 48:1498-1515.
- 1281 Penaluna, B. E., J. B. Dunham, and H. V. Andersen. 2021. Nowhere to hide: The importance of instream cover for stream-living Coastal Cutthroat Trout during seasonal low flow. *Ecology of Freshwater Fish* 30:256-269.
- 1282 Penaluna, B. E., J. B. Dunham, S. F. Railsback, I. Arismendi, S. L. Johnson, R. E. Bilby, M. Safeeq, and A. E. Skaugset. 2015. Local Variability Mediates Vulnerability of Trout Populations to Land Use and Climate Change. *Plos One* 10.
- 1283 Perkins, T. A., and H. I. Jager. 2011. Falling behind: Delayed growth explains life-history variation in Snake River fall Chinook salmon. *Transactions of the American Fisheries Society* 140:959-972.
- 1284 Perry, R. I., and D. Masson. 2013. An integrated analysis of the marine social-ecological system of the Strait of Georgia, Canada, over the past four decades, and development of a regime shift index. *Progress in Oceanography*
- 1285 Perry, R. I., K. Young, M. Galbraith, P. Chandler, A. Velez-Espino, and S. Baillie. 2021. Zooplankton variability in the Strait of Georgia, Canada, and relationships with the marine survivals of Chinook and Coho salmon. *Plos One* 16.
- 1286 Perry, R. W., A. C. Pope, J. G. Romine, P. L. Brandes, J. R. Burau, A. R. Blake, A. J. Ammann, and C. J. Michel. 2018. Flow-mediated effects on travel time, routing, and survival of juvenile Chinook salmon in a spatially complex, tidally forced river delta. *Canadian Journal of Fisheries and Aquatic Sciences* 75:1886-1901.
- 1287 Persson, L., A. Kagervall, K. Leonardsson, M. Royan, and A. Alanara. 2019. The effect of physiological and environmental conditions on smolt migration in Atlantic salmon *Salmo salar*. *Ecology of Freshwater Fish* 28:190-
- 1288 Peterson, J. O., C. A. Morgan, W. T. Peterson, and E. Di Lorenzo. 2013. Seasonal and interannual variation in the extent of hypoxia in the northern California Current from 1998-2012. *Limnology and Oceanography* 58:2279-2292.
- 1289 Peterson, J. T., J. E. Pease, L. Whitman, J. White, L. Stratton-Garvin, S. Rounds, and R. Wallick. 2021. Integrated tools for identifying optimal flow regimes and evaluating alternative minimum flows for recovering at-risk
- 1290 Peterson, M. L., A. N. Fuller, and D. Demko. 2017. Environmental factors associated with the upstream migration of fall-Run Chinook salmon in a regulated river. *North American Journal of Fisheries Management* 37:78-93.

- 1291 Peterson, M. L., D. J. Lee, J. Montgomery, M. Hellmair, A. Fuller, and D. Demko. 2020. Stability in reproductive timing and habitat usage of Chinook salmon across six years of varying environmental conditions and abundance.
- 1292 Peterson, W. T., C. A. Morgan, E. Casillas, J. L. Fisher, and J. W. Ferguson. 2010. Ocean ecosystem indicators of salmon marine survival in the Northern California Current. Northwest Fisheries Science Center, Seattle,
- 1293 Peterson, W. T., C. A. Morgan, J. P. Fisher, and E. Casillas. 2010. Ocean distribution and habitat associations of yearling coho (*Oncorhynchus kisutch*) and Chinook (*O. tshawytscha*) salmon in the northern California Current.
- 1294 Peterson, W. T., J. L. Fisher, J. O. Peterson, C. A. Morgan, B. J. Burke, and K. L. Fresh. 2014. Applied fisheries oceanography: Ecosystem indicators of ocean conditions inform fisheries management in the California Current.
- 1295 Petrosky, C. E., and H. A. Schaller. 2010. Influence of river conditions during seaward migration and ocean conditions on survival rates of Snake River Chinook salmon and steelhead. *Ecology of Freshwater Fish* 19:520-536.
- 1296 Petty, J. T., D. Thorne, B. M. Huntsman, and P. M. Mazik. 2014. The temperature-productivity squeeze: constraints on brook trout growth along an Appalachian river continuum. *Hydrobiologia* 727:151-166.
- 1297 Phillips, E. M., J. K. Horne, and J. E. Zamon. 2021. Characterizing juvenile salmon predation risk during early marine residence. *Plos One* 16:e0247241.
- 1298 Phillis, C. C., A. M. Sturrock, R. C. Johnson, and P. K. Weber. 2018. Endangered winter-run Chinook salmon rely on diverse rearing habitats in a highly altered landscape. *Biological Conservation* 217:358-362.
- 1299 Pinder, A. C., A. J. Harrison, and J. R. Britton. 2019. Temperature effects on the physiological status and reflex impairment in European grayling *Thymallus thymallus* from catch-and release angling. *Fisheries Research* 211:169-180.
- 1300 Pinsky, M. L., and N. J. Mantua. 2014. Emerging Adaptation Approaches for Climate-Ready Fisheries Management.
- 1301 Piou, C., and E. Prevost. 2012. A demo-genetic individual-based model for Atlantic salmon populations: Model structure, parameterization and sensitivity. *Ecological Modelling* 231:37-52.
- 1302 Piou, C., and E. Prevost. 2013. Contrasting effects of climate change in continental vs. oceanic environments on population persistence and microevolution of Atlantic salmon. *Global Change Biology* 19:711-723.
- 1303 Piou, C., M. H. Taylor, J. Papaix, and E. Prevost. 2015. Modelling the interactive effects of selective fishing and environmental change on Atlantic salmon demogenetics. *Journal of Applied Ecology* 52:1629-1637.
- 1304 Pitman, K. J., and J. W. Moore. 2021. The role of large, glaciated tributaries in cooling an important Pacific salmon migration corridor: a study of the Babine River. *Environmental Biology of Fishes* 104:1263-1277.
- 1305 Pitman, K. J., J. W. Moore, M. Huss, M. R. Sloat, D. C. Whited, T. J. Beechie, R. Brenner, E. W. Hood, A. M. Milner, G. R. Pess, G. H. Reeves, and D. E. Schindler. 2021. Glacier retreat creating new Pacific salmon habitat in western Canada. *Journal of Great Lakes Research* 47:100-110.
- 1306 Pitman, K. J., J. W. Moore, M. R. Sloat, A. H. Beaudreau, A. Bidlack, R. E. Brenner, E. W. Hood, G. R. Pess, N. J. Mantua, A. M. Milner, V. Radic, G. H. Reeves, D. E. Schindler, and D. C. Whited. 2020. Glacier Retreat and Pacific Salmon Migration: A Review of the Evidence and Implications for Management. *Journal of Great Lakes Research* 46:100-110.
- 1307 Pleizier, N. K., D. Algera, S. J. Cooke, and C. J. Brauner. 2020. A meta-analysis of gas bubble trauma in fish. *Fish and Fisheries* 21:1-15.
- 1308 Plumb, J. M. 2018. A bioenergetics evaluation of temperature-dependent selection for the spawning phenology by Snake River fall Chinook salmon. *Ecology and Evolution* 8:9633-9645.
- 1309 Poleo, A. B. S., B. M. Kjelsberg, N. A. Rukke, and L. A. Vollestad. 2021. Rapid recovery of normal gill morphology and blood physiology in brown trout (*Salmo trutta*) after short-term exposure to toxic concentrations of aqueous aluminium under non-steady state chemical conditions. *Journal of Limnology* 80.
- 1310 Poletto, J. B., D. E. Cocherell, S. E. Baird, T. X. Nguyen, V. Cabrera-Stagno, A. P. Farrell, and N. A. Fangue. 2017. Unusual aerobic performance at high temperatures in juvenile Chinook salmon, *Oncorhynchus tshawytscha*. *Journal of Experimental Biology* 230:1-10.
- 1311 Politano, M., and R. Laughery. 2020. A CFD model to assess lower Granite Dam operations under stratified conditions. *Journal of Applied Water Engineering and Research* 8:298-312.
- 1312 Pool, S. S., D. C. Reese, and R. D. Brodeur. 2012. Defining marine habitat of juvenile Chinook salmon, *Oncorhynchus tshawytscha*, and coho salmon, *O. kisutch*, in the Northern California Current System. *Journal of Great Lakes Research* 38:100-110.
- 1313 Pope, A. C., R. W. Perry, B. N. Harvey, D. J. Hance, and H. C. Hansel. 2021. Juvenile Chinook Salmon Survival, Travel Time, and Floodplain Use Relative to Riverine Channels in the Sacramento-San Joaquin River Delta. *Transactions of the American Society of Civil Engineers* 84:1-12.
- 1314 Popova, E. E., A. Yool, A. C. Coward, Y. K. Aksenov, S. G. Alderson, B. A. de Cuevas, and T. R. Anderson. 2010. Control of primary production in the Arctic by nutrients and light: Insights from a high resolution ocean general circulation model. *Journal of Geophysical Research* 115:C00001.
- 1315 Portner, H. O. 2010. Oxygen- and capacity-limitation of thermal tolerance: A matrix for integrating climate-related stressor effects in marine ecosystems. *Journal of Experimental Biology* 213:881-893.
- 1316 Portner, H. O. 2012. Integrating climate-related stressor effects on marine organisms: Unifying principles linking molecule to ecosystem-level changes. *Marine Ecology Progress Series* 470:273-290.
- 1317 Portner, H. O., C. Bock, and F. C. Mark. 2017. Oxygen- and capacity-limited thermal tolerance: bridging ecology and physiology. *J Exp Biol* 220:2685-2696.

1318 Poytress, W. R. 2016. Brood-year 2014 winter Chinook juvenile production indices with comparisons to juvenile production estimates derived from adult escapement. Report of U.S. Fish and Wildlife Service to U.S. Bureau of

1319 Pozo Buil, M., M. G. Jacox, J. Fiechter, M. A. Alexander, S. J. Bograd, E. N. Curchitser, C. A. Edwards, R. R. Rykaczewski, and C. A. Stock. 2021. A Dynamically Downscaled Ensemble of Future Projections for the California

1320 Prystay, T. S., E. J. Eliason, M. J. Lawrence, M. Dick, J. W. Brownscombe, D. A. Patterson, G. T. Crossin, S. G. Hinch, and S. J. Cooke. 2017. The influence of water temperature on sockeye salmon heart rate recovery following

1321 Prystay, T. S., R. de Bruijn, K. S. Peiman, S. G. Hinch, D. A. Patterson, A. P. Farrell, E. J. Eliason, and S. J. Cooke. 2020. Cardiac Performance of Free-Swimming Wild Sockeye Salmon during the Reproductive Period. *Integrative*

1322 Puffer, M., O. K. Berg, F. B. Hamnes, V. Bentsen, W. Koch, O. Ugedal, T. Forseth, J. V. Arnekleiv, and S. Einum. 2019. Density-independent use of shallow riverine areas in juvenile Atlantic salmon. *Canadian Journal of Fisheries*

1323 Pulg, U., R. J. Lennox, S. Stranzl, E. O. Espedal, S. E. Gabrielsen, T. Wiers, G. Velle, C. Hauer, B. O. Donnum, and B. T. Barlaup. 2022. Long-term effects and cost-benefit analysis of eight spawning gravel augmentations for Atlantic

1324 Pulkkinen, H., P. Orell, J. Erkinaro, and S. Mantyniemi. 2020. Bayesian arrival model for Atlantic salmon smolt counts powered by environmental covariates and expert knowledge. *Canadian Journal of Fisheries and Aquatic*

1325 Pulkkinen, K., L. R. Suomalainen, A. F. Read, D. Ebert, P. Rintamaki, and E. T. Valtonen. 2010. Intensive fish farming and the evolution of pathogen virulence: The case of columnaris disease in Finland. *Proceedings of the Royal*

1326 Putman, N. F., E. S. Jenkins, C. G. J. Michielsens, and D. L. G. Noakes. 2014. Geomagnetic imprinting predicts spatio-temporal variation in homing migration of pink and sockeye salmon. *Journal of the Royal Society Interface* 11.

1327 Queen, L. E., P. W. Mote, D. E. Rupp, O. Chegwidden, and B. Nijssen. 2021. Ubiquitous increases in flood magnitude in the Columbia River basin under climate change. *Hydrology and Earth System Sciences* 25:257-272.

1328 Quinn, T. P. 2021. Differential migration in Pacific salmon and trout: Patterns and hypotheses. *Animal Migration*

1329 Quinn, T. P., M. J. Unwin, and M. T. Kinnison. 2011. Contemporary divergence in migratory timing of naturalized populations of chinook salmon, *Oncorhynchus tshawytscha*, in New Zealand. *Evolutionary Ecology Research* 13:45-

1330 Quiñones, R. M., and P. B. Moyle. 2014. Climate change vulnerability of freshwater fishes of the San Francisco Bay area. *San Francisco Estuary and Watershed Science* 12.

1331 Quinones, R. M., M. Holyoak, M. L. Johnson, and P. B. Moyle. 2014. Potential factors affecting survival differ by run-timing and location: Linear mixed-effects models of Pacific salmonids (*Oncorhynchus* spp.) in the Klamath

1332 Quinones, R. M., T. E. Grantham, B. N. Harvey, J. D. Kiernan, M. Klasson, A. P. Wintzer, and P. B. Moyle. 2015. Dam removal and anadromous salmonid (*Oncorhynchus* spp.) conservation in California. *Reviews in Fish Biology and*

1333 Raby, G. D., C. L. J. Doherty, A. Mokdad, T. E. Pitcher, and A. T. Fisk. 2020. Post-exercise respirometry underestimates maximum metabolic rate in juvenile salmon. *Conservation Physiology* 8.

1334 Raby, G. D., S. J. Cooke, K. V. Cook, S. H. McConnachie, M. R. Donaldson, S. G. Hinch, C. K. Whitney, S. M. Drenner, D. A. Patterson, T. D. Clark, and A. P. Farrell. 2013. Resilience of pink salmon and chum salmon to simulated fisheries capture stress incurred upon arrival at spawning grounds. *Transactions of the American Fisheries Society*

1335 Radchenko, V. I., S. V. Loboda, A. L. Figurkin, K. M. Gorbatenko, and E. E. Ovsyannikov. 2010. Environmental conditions and compositions of plankton and nekton in the epipelagic zone of the northwestern Pacific Ocean in summer 2009, the year of the largest spawning migration of pink and Chum Salmon. *Russian Journal of Marine*

1336 Radford, C. A., S. P. Collins, P. L. Munday, and D. Parsons. 2021. Ocean acidification effects on fish hearing. *Proceedings of the Royal Society B: Biological Sciences* 288:20202754.

1337 Rahel, F. J., and J. D. Olden. 2008. Assessing the effects of climate change on aquatic invasive species.

1338 Railsback, S. F., D. Ayllon, and B. C. Harvey. 2021. InSTREAM 7: Instream flow assessment and management model for stream trout. *River Research and Applications* 37:1294-1302.

1339 Ralston, D. K., and S. K. Moore. 2020. Modeling harmful algal blooms in a changing climate. *Harmful Algae*

1340 Ralston, S., K. M. Sakuma, and J. C. Field. 2013. Interannual variation in pelagic juvenile rockfish (*Sebastes* spp.) abundance - going with the flow. *Fisheries Oceanography* 22:288-308.

1341 Rand, P. S., M. Goslin, M. R. Gross, J. R. Irvine, X. Augerot, P. A. McHugh, and V. F. Bugaev. 2012. Global assessment of extinction risk to populations of sockeye salmon *Oncorhynchus nerka*. *Plos One* 7:e34065.

1342 Rangwala, I., W. Moss, J. Wolken, R. Rondeau, K. Newlon, J. Guinotte, and W. R. Travis. 2021. Uncertainty, Complexity and Constraints: How Do We Robustly Assess Biological Responses under a Rapidly Changing Climate?

1343 Ray, R. A., and J. L. Bartholomew. 2013. Estimation of transmission dynamics of the *Ceratomyxa shasta* actinospore to the salmonid host. *Parasitology* 140:907-916.

1344 Ray, R. A., P. A. Rossignol, and J. L. Bartholomew. 2010. Mortality threshold for juvenile Chinook salmon *Oncorhynchus tshawytscha* in an epidemiological model of *Ceratomyxa shasta*. *Diseases of Aquatic Organisms*

- 1345 Ray, R. A., R. A. Holt, and J. L. Bartholomew. 2012. Relationship between temperature and *Ceratomyxa shasta*-induced mortality in Klamath River salmonids. *Journal of Parasitology* 98:520-526.
- 1346 Ray, R. A., R. W. Perry, N. A. Som, and J. L. Bartholomew. 2014. Using cure models for analyzing the influence of pathogens on salmon survival. *Transactions of the American Fisheries Society* 143:387-398.
- 1347 Raymond, C. L., D. L. Peterson, and R. M. Rochefort, editors. 2014. Climate change vulnerability and adaptation in the North Cascades region, Washington. U.S. Department of Agriculture, Forest Service, Pacific Northwest
- 1348 Rechisky, E. L., A. D. Porter, T. D. Clark, N. B. Furey, M. K. Gale, S. G. Hinch, and D. W. Welch. 2019. Quantifying survival of age-2 Chilko Lake sockeye salmon during the first 50 days of migration. *Canadian Journal of Fisheries*
- 1349 Recsetar, M. S., M. P. Zeigler, D. L. Ward, S. A. Bonar, and C. A. Caldwell. 2012. Relationship between fish size and upper thermal tolerance. *Transactions of the American Fisheries Society* 141:1433-1438.
- 1350 Reed, T. E., D. E. Schindler, M. J. Hague, D. A. Patterson, E. Meir, R. S. Waples, and S. G. Hinch. 2011. Time to evolve? Potential evolutionary responses of Fraser River sockeye salmon to climate change and effects on
- 1351 Reed, T. E., G. Martinek, and T. P. Quinn. 2010. Lake-specific variation in growth, migration timing and survival of juvenile sockeye salmon *Oncorhynchus nerka*: Separating environmental from genetic influences. *Journal of Fish*
- 1352 Reed, T. E., P. Prodohl, C. Bradley, J. Gilbey, P. McGinnity, C. R. Primmer, and P. J. Bacon. 2019. Heritability estimation via molecular pedigree reconstruction in a wild fish population reveals substantial evolutionary potential for sea age at maturity, but not size within age classes. *Canadian Journal of Fisheries and Aquatic*
- 1353 Reed, T. E., R. S. Waples, D. E. Schindler, J. J. Hard, and M. T. Kinnison. 2010. Phenotypic plasticity and population viability: The importance of environmental predictability. *Proceedings of the Royal Society B-Biological Sciences*
- 1354 Reeder, W. J., F. Gariglio, R. Carnie, C. Tang, D. Isaak, Q. Chen, Z. Yu, J. A. McKean, and D. Tonina. 2021. Some (fish might) like it hot: Habitat quality and fish growth from past to future climates. *Science of the Total Environment*
- 1355 Reese, A. L., and E. E. Williams. 2012. Temperature as a cellular stress of Chinook salmon embryo cells. *Faseb*
- 1356 Reeves, G. H., J. B. Grunbaum, and D. W. Lang. 2010. Seasonal variation in diel behaviour and habitat use by age 1+Steelhead (*Oncorhynchus mykiss*) in Coast and Cascade Range streams in Oregon, USA. *Environmental Biology*
- 1357 Regish, A. M., W. R. Ardren, N. R. Staats, H. Bouchard, J. L. Withers, T. Castro-Santos, and S. D. McCormick. 2021. Surface water with more natural temperatures promotes physiological and endocrine changes in landlocked Atlantic salmon smolts. *Canadian Journal of Fisheries and Aquatic Sciences* 78:775-786.
- 1358 Reid, D. A., M. A. Hassan, S. Bird, R. Pike, and P. Tschaplinski. 2020. Does variable channel morphology lead to dynamic salmon habitat? *Earth Surface Processes and Landforms* 45:295-311.
- 1359 Reid, D. A., R. Pike, S. Bird, P. Tschaplinski, and D. Wilford. 2020. Implications of legacy watershed disturbances for channel structure and salmon habitat availability under different low-flow levels: an analysis of 45 years of discharge-habitat relationships at Carnation Creek, British Columbia. *Canadian Journal of Fisheries and Aquatic*
- 1360 Renardy, S., A. Takriet, J. P. Benitez, A. Dierckx, R. Baeyens, J. Coeck, I. S. Pauwels, A. Mouton, P. Archambeau, B. Dewals, M. Piroton, S. Ericum, and M. Ovidio. 2021. Trying to choose the less bad route: Individual migratory behaviour of Atlantic salmon smolts (*Salmo salar* L.) approaching a bifurcation between a hydropower station and
- 1361 Renardy, S., J. P. Benitez, A. Tauzin, A. Dierckx, B. N. Matondo, and M. Ovidio. 2020. How and where to pass? Atlantic salmon smolt's behaviour at a hydropower station offering multiple migration routes. *Hydrobiologia*
- 1362 Rensel, J. E. J., N. Haigh, and T. J. Tynan. 2010. Fraser river sockeye salmon marine survival decline and harmful blooms of *Heterosigma akashiwo*. *Harmful Algae* 10:98-115.
- 1363 Reum, J. C. P., B. E. Ferriss, P. S. McDonald, D. M. Farrell, C. J. Harvey, T. Klinger, and P. S. Levin. 2015. Evaluating community impacts of ocean acidification using qualitative network models. *Marine Ecology Progress Series*
- 1364 Reum, J. C. P., J. L. Blanchard, K. K. Holsman, K. Aydin, A. B. Hollowed, A. J. Hermann, W. Cheng, A. Faig, A. C. Haynie, and A. E. Punt. 2020. Ensemble Projections of Future Climate Change Impacts on the Eastern Bering Sea Food Web Using a Multispecies Size Spectrum Model. *Frontiers in Marine Science* 7.
- 1365 Rhodes-Reese, M., D. Clay, C. Cunningham, J. Moriles-Miller, C. Reese, J. Roman, J. D. Warren, and H. C. Pearson. 2021. Examining the Role of Marine Mammals and Seabirds in Southeast Alaska's Marine Ecosystem Dynamics.
- 1366 Riar, N., J. Crago, W. Y. Jiang, L. A. Maryoung, J. Gan, and D. Schlenk. 2013. Effects of salinity acclimation on the endocrine disruption and acute toxicity of bifenthrin in freshwater and euryhaline strains of *Oncorhynchus*
- 1367 Ribera, J. M., M. Nipkow, T. Viergutz, R. M. Brunner, R. Bochert, R. Koll, T. Goldammer, U. Gimsa, and A. Rebl. 2020. Early response of salmonid head-kidney cells to stress hormones and toll-like receptor ligands. *Fish &*
- 1368 Richard, A., L. Bernatchez, E. Valiquette, and M. Dionne. 2014. Telemetry reveals how catch and release affects prespawning migration in Atlantic salmon (*Salmo salar*). *Canadian Journal of Fisheries and Aquatic Sciences*

- 1369 Richard, A., M. Dionne, J. L. Wang, and L. Bernatchez. 2013. Does catch and release affect the mating system and individual reproductive success of wild Atlantic salmon (*Salmo salar* L.)? *Molecular Ecology* 22:187-200.
- 1370 Richards, D. C., G. Lester, J. Pfeiffer, and J. Pappani. 2018. Temperature threshold models for benthic macroinvertebrates in Idaho wadeable streams and neighboring ecoregions. *Environmental Monitoring and*
- 1371 Richardson, A. J., A. Bakun, G. C. Hays, and M. J. Gibbons. 2009. The jellyfish joyride: Causes, consequences and management responses to a more gelatinous future. *Trends in Ecology & Evolution* 24:312-322.
- 1372 Richardson, A. J., and M. J. Gibbons. 2008. Are jellyfish increasing in response to ocean acidification? *Limnology*
- 1373 Riche, O., S. C. Johannessen, and R. W. Macdonald. 2014. Why timing matters in a coastal sea: Trends, variability and tipping points in the Strait of Georgia, Canada. *Journal of Marine Systems* 131:36-53.
- 1374 Richer, E. E., E. A. Gates, M. C. Kondratieff, and A. T. Herdrich. 2019. Modelling changes in trout habitat following stream restoration. *River Research and Applications* 35:680-691.
- 1375 Richerson, K., D. S. Holland, and J. Schmidt. 2017. Quantifying and predicting responses to a US West Coast salmon fishery closure. *Ices Journal of Marine Science* 74:2364-2378.
- 1376 Riedl, C., and A. Peter. 2013. Timing of brown trout spawning in Alpine rivers with special consideration of egg burial depth. *Ecology of Freshwater Fish* 22:384-397.
- 1377 Rikardsen, A. H., D. Righton, J. F. Strom, E. B. Thorstad, P. Gargan, T. Sheehan, F. Okland, C. M. Chittenden, R. D. Hedger, T. F. Naesje, M. Renkawitz, J. Sturlaugsson, P. Caballero, H. Baktoft, J. G. Davidsen, E. Halttunen, S. Wright, B. Finstad, and K. Aarestrup. 2021. Redefining the oceanic distribution of Atlantic salmon. *Scientific*
- 1378 Riley, W. D., B. Bendall, M. J. Ives, N. J. Edmonds, and D. L. Maxwell. 2012. Street lighting disrupts the diel migratory pattern of wild Atlantic salmon, *Salmo salar* L., smolts leaving their natal stream. *Aquaculture* 330:74-
- 1379 Ritter, T. D., A. V. Zale, G. Grisak, and M. J. Lance. 2020. Groundwater Upwelling Regulates Thermal Hydrodynamics and Salmonid Movements during High-Temperature Events at a Montane Tributary Confluence.
- 1380 Rivers-Moore, N. A., B. R. Ellender, and O. L. F. Weyl. 2019. Modelling expected trout ranges under current and future water temperature regimes in the Eastern Cape, South Africa. *African Journal of Aquatic Science* 44:35-42.
- 1381 Roberts, J. J., K. D. Fausch, D. P. Peterson, and M. B. Hooten. 2013. Fragmentation and thermal risks from climate change interact to affect persistence of native trout in the Colorado River basin. *Global Change Biology* 19:1383-
- 1382 Roberts, J. J., K. D. Fausch, T. S. Schmidt, and D. M. Walters. 2017. Thermal regimes of Rocky Mountain lakes warm with climate change. *Plos One* 12:e0179498.
- 1383 Robinson, H. E., J. D. Alexander, S. L. Hallett, and N. A. Som. 2020. Prevalence of Infection in Hatchery-Origin Chinook Salmon Correlates with Abundance of *Ceratonova shasta* Spores: Implications for Management and Disease Risk. *North American Journal of Fisheries Management* 40:959-972.
- 1384 Robinson, J. M., D. C. Josephson, B. C. Weidel, and C. E. Kraft. 2010. Influence of variable interannual summer water temperatures on brook trout growth, consumption, reproduction, and mortality in an unstratified
- 1385 Robinson, K. L., J. J. Ruzicka, M. B. Decker, R. D. Brodeur, F. J. Hernandez, J. Quiñones, E. M. Acha, S.-i. Uye, H. Mianzan, and W. M. Graham. 2014. Jellyfish, forage fish, and the world's major fisheries. *Oceanography* 27:104-
- 1386 Robinson, R. R., J. Notch, A. McHuron, R. Logston, T. Pham, and A. J. Ammann. 2021. The effects of water temperature, acoustic tag type, size at tagging, and surgeon experience on juvenile Chinook salmon
- 1387 Rodeles, A. A., D. Galicia, and R. Miranda. 2020. A new method to include fish biodiversity in river connectivity indices with applications in dam impact assessments. *Ecological Indicators* 117.
- 1388 Roegner, G. C., and D. J. Teel. 2014. Density and condition of subyearling Chinook salmon in the Lower Columbia River and estuary in relation to water temperature and genetic stock of origin. *Transactions of the American*
- 1389 Roegner, G. C., G. E. Johnson, and A. M. Coleman. 2021. Indexing habitat opportunity for juvenile anadromous fishes in tidal-fluvial wetland systems. *Ecological Indicators* 124:107422.
- 1390 Roegner, G. C., J. A. Needoba, and A. M. Baptista. 2011. Coastal upwelling supplies Oxygen-depleted water to the Columbia River Estuary. *Plos One* 6:e18672.
- 1391 Rogers, J., E. Stein, M. Beck, K. Flint, A. Kinoshita, and R. Ambrose. 2021. Modelling future changes to the hydrological and thermal regime of unaltered streams using projected changes in climate to support planning for
- 1392 Rogers, L. A., D. E. Schindler, P. J. Lisi, G. W. Holtgrieve, P. R. Leavitt, L. Bunting, B. P. Finney, D. T. Selbie, G. J. Chen, I. Gregory-Eaves, M. J. Lisac, and P. B. Walsh. 2013. Centennial-scale fluctuations and regional complexity characterize Pacific salmon population dynamics over the past five centuries. *Proceedings of the National*
- 1393 Rogers, L. A., S. J. Peacock, P. McKenzie, S. DeDominicis, S. R. Jones, P. Chandler, M. G. Foreman, C. W. Revie, and M. Krkosek. 2013. Modeling parasite dynamics on farmed salmon for precautionary conservation management of



- 1394 Rojas, M., M. Pellon, C. Cerda, R. Ulloa, R. Suarez, M. Godoy, and M. del Sol. 2020. Deformation of the Caudal Fin in Atlantic Salmon fry (*Salmo salar*), in the Yolk Sac Stage. *International Journal of Morphology* 38:1631-1638.
- 1395 Roloson, S. D., M. R. S. Coffin, K. M. Knysh, and M. R. van den Heuvel. 2021. Movement of non-native rainbow trout in an estuary with periodic summer hypoxia. *Hydrobiologia* 848:4001-4016.
- 1396 Roni, P., P. J. Anders, T. J. Beechie, and D. J. Kaplowe. 2018. Review of tools for identifying, planning, and implementing habitat restoration for Pacific salmon and steelhead. *North American Journal of Fisheries*
- 1397 Roscoe, D. W., S. G. Hinch, S. J. Cooke, and D. A. Patterson. 2010. Behaviour and thermal experience of adult sockeye salmon migrating through stratified lakes near spawning grounds: The roles of reproductive and energetic
- 1398 Rose, V., G. Rollwagen-Bollens, S. M. Bollens, and J. Zimmerman. 2019. The effects of run-of-river dam spill on Columbia River microplankton. *River Research and Applications* 35:1478-1488.
- 1399 Rosenfeld, J. S. 2017. Developing flow-ecology relationships: Implications of nonlinear biological responses for water management. *Freshwater Biology* 62:1305-1324.
- 1400 Rosenfeld, J. S., and S. M. Naman. 2021. Identifying and mitigating systematic biases in fish habitat simulation modeling: Implications for estimating minimum instream flows. *River Research and Applications* 37:869-879.
- 1401 Rosengard, S. Z., C. Freshwater, S. McKinnell, Y. Xu, and P. D. Tortell. 2021. Covariability of Fraser River sockeye salmon productivity and phytoplankton biomass in the Gulf of Alaska. *Fisheries Oceanography* 30:666-678.
- 1402 Ross, P. S., C. J. Kennedy, L. K. Shelley, K. B. Tierney, D. A. Patterson, W. L. Fairchild, and R. W. Macdonald. 2013. The trouble with salmon: Relating pollutant exposure to toxic effect in species with transformational life histories and lengthy migrations. *Canadian Journal of Fisheries and Aquatic Sciences* 70:1252-1264.
- 1403 Rossi, G. J., M. E. Power, S. Pneh, J. R. Neuswanger, and T. J. Caldwell. 2021. Foraging modes and movements of *Oncorhynchus mykiss* as flow and invertebrate drift recede in a California stream. *Canadian Journal of Fisheries*
- 1404 Rossoll, D., R. Bermudez, H. Hauss, K. G. Schulz, U. Riebesell, U. Sommer, and M. Winder. 2012. Ocean acidification-induced food quality deterioration constrains trophic transfer. *Plos One* 7:e34737.
- 1405 Rougemont, Q., and L. Bernatchez. 2018. The demographic history of Atlantic salmon (*Salmo salar*) across its distribution range reconstructed from approximate Bayesian computations. *Evolution* 72:1261-1277.
- 1406 Roy, M. L., A. G. Roy, J. W. A. Grant, and N. E. Bergeron. 2013. Individual variability in the movement behaviour of juvenile Atlantic salmon. *Canadian Journal of Fisheries and Aquatic Sciences* 70:339-347.
- 1407 Roy, M. L., A. G. Roy, J. W. A. Grant, and N. E. Bergeron. 2013. Individual variability of wild juvenile Atlantic salmon activity patterns: effect of flow stage, temperature, and habitat use. *Canadian Journal of Fisheries and Aquatic*
- 1408 Roze, T., F. Christen, A. Amerand, and G. Claireaux. 2013. Trade-off between thermal sensitivity, hypoxia tolerance and growth in fish. *Journal of Thermal Biology* 38:98-106.
- 1409 Rub, A. M. W., and B. P. Sandford. 2020. Evidence of a 'dinner bell' effect from acoustic transmitters in adult Chinook salmon. *Marine Ecology Progress Series* 641:1-11.
- 1410 Rub, A. M. W., B. P. Sandford, J. M. Butzerin, and A. S. Cameron. 2020. Pushing the envelope: Micro-transmitter effects on small juvenile Chinook salmon (*Oncorhynchus tshawytscha*). *Plos One* 15.
- 1411 Rub, A. M. W., N. A. Som, M. J. Henderson, B. P. Sandford, D. M. Van Doornik, D. J. Teel, M. J. Tennis, O. P. Langness, B. K. van der Leeuw, and D. D. Huff. 2019. Changes in adult Chinook salmon (*Oncorhynchus tshawytscha*) survival within the lower Columbia River amid increasing pinniped abundance. *Canadian Journal of*
- 1412 Rubenson, E. S., and J. D. Olden. 2020. An invader in salmonid rearing habitat: current and future distributions of smallmouth bass (*Micropterus dolomieu*) in the Columbia River Basin. *Canadian Journal of Fisheries and Aquatic*
- 1413 Rubenson, E. S., D. J. Lawrence, and J. D. Olden. 2020. Threats to Rearing Juvenile Chinook Salmon from Nonnative Smallmouth Bass Inferred from Stable Isotope and Fatty Acid Biomarkers. *Transactions of the American Fisheries*
- 1414 Rubenstein, M. A., R. Christophersen, and J. I. Ransom. 2019. Trophic implications of a phenological paradigm shift: Bald eagles and salmon in a changing climate. *Journal of Applied Ecology* 56:769-778.
- 1415 Rubin, A., P. de Coulon, C. Bailey, H. Segner, T. Wahli, and J. F. Rubin. 2019. Keeping an Eye on Wild Brown Trout (*Salmo trutta*) Populations: Correlation Between Temperature, Environmental Parameters, and Proliferative
- 1416 Ruff, C. P., D. E. Schindler, J. B. Armstrong, K. T. Bentley, G. T. Brooks, G. W. Holtgrieve, M. T. McGlaulin, C. E. Torgersen, and J. E. Seeb. 2011. Temperature-associated population diversity in salmon confers benefits to mobile
- 1417 Ruggerone, G. T., A. M. Springer, L. D. Shaul, and G. B. van Vliet. 2019. Unprecedented biennial pattern of birth and mortality in an endangered apex predator, the southern resident killer whale, in the eastern North Pacific
- 1418 Ruggerone, G. T., and B. M. Connors. 2015. Productivity and life history of sockeye salmon in relation to competition with pink and sockeye salmon in the North Pacific Ocean. *Canadian Journal of Fisheries and Aquatic*

- 1419 Ruggerone, G. T., and J. R. Irvine. 2018. Numbers and biomass of natural- and hatchery origin pink salmon, chum salmon, and sockeye salmon in the North Pacific Ocean, 1925-2015. *Marine and Coastal Fisheries: Dynamics*, 1420 Rundio, D. E., and S. T. Lindley. 2008. Seasonal patterns of terrestrial and aquatic prey abundance and use by *Oncorhynchus mykiss* in a California coastal basin with a Mediterranean climate. *Transactions of the American* 1421 Rupp, D. E., T. C. Wainwright, P. W. Lawson, and W. T. Peterson. 2012. Marine environment-based forecasting of coho salmon (*Oncorhynchus kisutch*) adult recruitment. *Fisheries Oceanography* 21:1-19.
- 1422 Russell, I. C., M. W. Aprahamian, J. Barry, I. C. Davidson, P. Fiske, A. T. Ibbotson, R. J. Kennedy, J. C. Maclean, A. Moore, J. Otero, T. Potter, and C. D. Todd. 2012. The influence of the freshwater environment and the biological characteristics of Atlantic salmon smolts on their subsequent marine survival. *Ices Journal of Marine Science* 1423 Ruzicka, J. J., E. A. Daly, and R. D. Brodeur. 2016. Evidence that summer jellyfish blooms impact Pacific Northwest salmon production. *Ecosphere* 7:22.
- 1424 Ruzicka, J. J., K. H. Brink, D. J. Gifford, and F. Bahr. 2016. A physically coupled end-to-end model platform for coastal ecosystems: Simulating the effects of climate change and changing upwelling characteristics on the 1425 Ruzicka, J. J., R. D. Brodeur, R. L. Emmett, J. H. Steele, J. E. Zamon, C. A. Morgan, A. C. Thomas, and T. C. Wainwright. 2012. Interannual variability in the Northern California Current food web structure: Changes in energy flow pathways and the role of forage fish, euphausiids, and jellyfish. *Progress in Oceanography* 102:19-41.
- 1426 Ryan, D. K., J. M. Yearsley, and M. Kelly-Quinn. 2013. Quantifying the effect of semi-natural riparian cover on stream temperatures: Implications for salmonid habitat management. *Fisheries Management and Ecology* 20:494- 1427 Rykaczewski, R. R., and J. P. Dunne. 2010. Enhanced nutrient supply to the California Current Ecosystem with global warming and increased stratification in an earth system model. *Geophysical Research Letters* 37:L21606.
- 1428 Saadi, A., A. Msilini, C. Charron, A. St-Hilaire, and T. B. M. J. Ouarda. 2022. Estimation of the area of potential thermal refuges using generalized additive models and multivariate adaptive regression splines: A case study from the Ste-Marguerite River. *River Research and Applications* 38:23-35.
- 1429 Sabal, M. C., D. D. Huff, M. J. Henderson, J. Fiechter, J. A. Harding, and S. A. Hayes. 2016. Contrasting patterns in growth and survival of Central Valley fall run Chinook salmon related to hatchery and ocean conditions. 1430 Sabal, M. C., E. L. Hazen, S. J. Bograd, R. B. MacFarlane, I. D. Schroeder, S. A. Hayes, J. A. Harding, K. L. Scales, P. I. Miller, A. J. Ammann, and B. K. Wells. 2020. California Current seascape influences juvenile salmon foraging 1431 Safford, T. G., and K. C. Norman. 2011. Water water everywhere, but not enough for salmon? Organizing integrated water and fisheries management in Puget Sound. *Journal of Environmental Management* 92:838-847.
- 1432 Saito, T., I. Shimizu, J. Seki, T. Kaga, E. Hasegawa, H. Saito, and K. Nagasawa. 2010. Can research on the early marine life stage of juvenile chum salmon *Oncorhynchus keta* forecast returns of adult salmon? A case study from 1433 Saito, T., T. Kaga, E. Hasegawa, and K. Nagasawa. 2011. Effects of juvenile size at release and early marine growth on adult return rates for Hokkaido chum salmon (*Oncorhynchus keta*) in relation to sea surface temperature. 1434 Saltveit, S. J., A. Brabrand, A. Juarez, M. Stickler, and B. O. Donnum. 2020. The Impact of Hydropeaking on Juvenile Brown Trout (*Salmo trutta*) in a Norwegian Regulated River. *Sustainability* 12.
- 1435 Saltveit, S. J., A. Brabrand, and J. E. Brittain. 2019. Rivers need floods: Management lessons learnt from the regulation of the Norwegian salmon river, Suldalslagen. *River Research and Applications* 35:1181-1191. 1436 Sandvik, A. D., S. Dalvin, R. Skern-Mauritzen, and M. D. Skogen. 2021. The effect of a warmer climate on the salmon lice infection pressure from Norwegian aquaculture. *Ices Journal of Marine Science* 78:1849-1859.
- 1437 Santiago, J. M., C. Alonso, D. G. de Jalon, J. Solana-Gutierrez, and R. Munoz-Mas. 2020. Effects of climate change on the life stages of stream-dwelling brown trout (*Salmo trutta* Linnaeus, 1758) at the rear edge of their native 1438 Santora, J. A., E. L. Hazen, I. D. Schroeder, S. J. Bograd, K. M. Sakuma, and J. C. Field. 2017. Impacts of ocean climate variability on biodiversity of pelagic forage species in an upwelling ecosystem. *Marine Ecology Progress* 1439 Santora, J. A., W. J. Sydeman, I. D. Schroeder, J. C. Field, R. R. Miller, and B. K. Wells. 2017. Persistence of trophic hotspots and relation to human impacts within an upwelling marine ecosystem. *Ecol Appl* 27:560-574.
- 1440 Sapin, J. R., L. Saito, A. Dai, B. Rajagopalan, R. Blair Hanna, and D. Kauneckis. 2017. Demonstration of integrated reservoir operations and extreme hydroclimate modeling of water temperatures for fish sustainability below 1441 Sappal, R., M. Fast, D. Stevens, F. Kibenge, A. Siah, and C. Kamunde. 2015. Effects of copper, hypoxia and acute temperature shifts on mitochondrial oxidation in rainbow trout (*Oncorhynchus mykiss*) acclimated to warm 1442 Sappal, R., N. MacDonald, M. Fast, D. Stevens, F. Kibenge, A. Siah, and C. Kamunde. 2014. Interactions of copper and thermal stress on mitochondrial bioenergetics in rainbow trout, *Oncorhynchus mykiss*. *Aquatic Toxicology* 1443 Sato, M., A. W. Trites, and S. Gauthier. 2021. Southern resident killer whales encounter higher prey densities than northern resident killer whales during summer. *Canadian Journal of Fisheries and Aquatic Sciences* 78:1732-1743.

- 1444 Satterthwaite, W. H., K. S. Andrews, B. J. Burke, J. L. Gosselin, C. M. Greene, C. J. Harvey, S. H. Munsch, M. R. O'Farrell, J. F. Samhuri, and K. L. Sobocinski. 2020. Ecological thresholds in forecast performance for key United States West Coast Chinook salmon stocks. *Ices Journal of Marine Science* 77:1503-1515.
- 1445 Satterthwaite, W. H., M. P. Beakes, E. M. Collins, D. R. Swank, J. E. Merz, R. G. Titus, S. M. Sogard, and M. Mangel. 2010. State-dependent life history models in a changing (and regulated) environment: Steelhead in the California
- 1446 Satterthwaite, W. H., M. S. Mohr, M. R. O'Farrell, and B. K. Wells. 2012. A Bayesian hierarchical model of size-at-age in ocean-harvested stocks - quantifying effects of climate and temporal variability. *Canadian Journal of*
- 1447 Sawaske, S. R., and D. L. Freyberg. 2014. An analysis of trends in baseflow recession and low-flows in rain-dominated coastal streams of the pacific coast. *Journal of Hydrology* 519:599-610.
- 1448 Schade, F. M., L. N. S. Shama, and K. M. Wegner. 2014. Impact of thermal stress on evolutionary trajectories of pathogen resistance in three-spined stickleback (*Gasterosteus aculeatus*). *Bmc Evolutionary Biology* 14.
- 1449 Schakau, V., F. M. Hilker, and M. A. Lewis. 2019. Fish disease dynamics in changing rivers: Salmonid Ceratomyxosis in the Klamath River. *Ecological Complexity* 40:12.
- 1450 Scheuerell, M. D., C. P. Ruff, J. H. Anderson, and E. M. Beamer. 2021. An integrated population model for estimating the relative effects of natural and anthropogenic factors on a threatened population of steelhead
- 1451 Schindler, D. E., J. B. Armstrong, and T. E. Reed. 2015. The portfolio concept in ecology and evolution. *Frontiers in Ecology and the Environment* 13:257-263.
- 1452 Schmidt-Posthaus, H., P. Steiner, B. Muller, and A. Casanova-Nakayama. 2013. Complex interaction between proliferative kidney disease, water temperature and concurrent nematode infection in brown trout. *Diseases of*
- 1453 Schmidt, A. E., L. W. Botsford, J. M. Eadie, R. W. Bradley, E. Di Lorenzo, and J. Jahncke. 2014. Non-stationary seabird responses reveal shifting ENSO dynamics in the northeast Pacific. *Marine Ecology Progress Series* 499:249-
- 1454 Schneider, K. N., R. M. Newman, V. Card, S. Weisberg, and D. L. Pereira. 2010. Timing of walleye spawning as an indicator of climate change. *Transactions of the American Fisheries Society* 139:1198 - 1210.
- 1455 Schoen, E. R., K. W. Sellmer, M. S. Wipfli, J. A. Lopez, R. Ivanoff, and B. E. Meyer. 2021. Piscine predation on juvenile salmon in sub-arctic Alaskan rivers: Associations with season, habitat, predator size and streamflow.
- 1456 Schoen, E. R., M. S. Wipfli, E. J. Trammell, D. J. Rinella, A. L. Floyd, J. Grunblatt, M. D. McCarthy, B. E. Meyer, J. M. Morton, J. E. Powell, A. Prakash, M. N. Reimer, S. L. Stuefer, H. Toniolo, B. M. Wells, and F. D. W. Witmer. 2017. Future of Pacific salmon in the face of environmental change: Lessons from one of the world's remaining
- 1457 Schulting, L., C. K. Feld, B. Zeiringer, H. Hudek, and W. Graf. 2019. Macroinvertebrate drift response to hydropеaking: An experimental approach to assess the effect of varying ramping velocities. *Ecohydrology* 12:12.
- 1458 Scribner, K. T., C. Soiseth, J. McGuire, G. K. Sage, L. Thorsteinson, J. L. Nielsen, and E. Knudsen. 2017. Genetic assessment of the effects of streamscape succession on coho salmon *Oncorhynchus kisutch* colonization in
- 1459 Seeb, L. W., J. E. Seeb, C. Habicht, E. V. Farley, and F. M. Utter. 2011. Single-nucleotide polymorphic genotypes reveal patterns of early juvenile migration of sockeye salmon in the eastern Bering Sea. *Transactions of the*
- 1460 Segura, C., K. D. Bladon, J. A. Hatten, J. A. Jones, V. C. Hale, and G. G. Ice. 2020. Long-term effects of forest harvesting on summer low flow deficits in the Coast Range of Oregon. *Journal of Hydrology* 585.
- 1461 Seitz, A. C., M. B. Courtney, M. D. Evans, and K. Manishin. 2019. Pop-up satellite archival tags reveal evidence of intense predation on large immature Chinook salmon (*Oncorhynchus tshawytscha*) in the North Pacific Ocean. *Canadian Journal of Fisheries and Aquatic Sciences* 76:1608-1615.
- 1462 Selbie, D. T., J. N. Sweetman, P. Etherton, K. D. Hyatt, D. P. Rankin, B. P. Finney, and J. P. Smol. 2011. Climate change modulates structural and functional lake ecosystem responses to introduced anadromous salmon.
- 1463 Sellheim, K., S. Zeug, and J. Merz. 2020. Informed water management alternatives for an over-allocated river: Incorporating salmon life stage effects into a decision tree process during drought. *Fisheries Management and*
- 1464 Seney, E. E., M. J. Rowland, R. A. Lowery, R. B. Griffis, and M. M. McClure. 2013. Climate change, marine environments, and the U.S. Endangered Species Act. *Conservation Biology* 27:1138-1146.
- 1465 Sergeant, C. J., J. B. Armstrong, and E. J. Ward. 2015. Predator-prey migration phenologies remain synchronised in a warming catchment. *Freshwater Biology* 60:724-732.
- 1466 Sergeant, C. J., J. R. Bellmore, C. McConnell, and J. W. Moore. 2017. High salmon density and low discharge create periodic hypoxia in coastal rivers. *Ecosphere* 8.
- 1467 Servili, A., A. V. M. Canario, O. Mouchel, and J. A. Munoz-Cueto. 2020. Climate change impacts on fish reproduction are mediated at multiple levels of the brain-pituitary-gonad axis. *General and Comparative*
- 1468 Sestrich, C. M., T. E. McMahon, and M. K. Young. 2011. Influence of fire on native and nonnative salmonid populations and habitat in a western Montana basin. *Transactions of the American Fisheries Society* 140:136-146.

- 1469 Sethi, S. A., J. Ashline, B. P. Harris, J. Gerken, and F. Restrepo. 2021. Connectivity between lentic and lotic freshwater habitats identified as a conservation priority for coho salmon. *Aquatic Conservation-Marine and*
- 1470 Shaftel, R., S. Mauger, J. Falke, D. Rinella, J. Davis, and L. Jones. 2020. Thermal Diversity of Salmon Streams in the Matanuska-Susitna Basin, Alaska. *Journal of the American Water Resources Association* 56:630-646.
- 1471 Shah, N. W., T. R. Nisbet, and S. B. Broadmeadow. 2021. The impacts of conifer afforestation and climate on water quality and freshwater ecology in a sensitive peaty catchment: A 25 year study in the upper River Halladale in
- 1472 Shahin, K., T. Veek, T. I. Heckman, E. Littman, K. Mukkatira, M. Adkison, T. J. Welch, D. M. Imai, G. Pastenkos, A. Camus, and E. Soto. 2021. Isolation and characterization of *Lactococcus garvieae* from rainbow trout, *Onchorhynchus mykiss*, from California, USA. *Transboundary and Emerging Diseases*.
- 1473 Shanks, A. L., L. K. Rasmuson, J. R. Valley, M. A. Jarvis, C. Salant, D. A. Sutherland, E. I. Lamont, M. A. H. Hainey, and R. B. Emlet. 2020. Marine heat waves, climate change, and failed spawning by coastal invertebrates.
- 1474 Shanley, C. S., and D. M. Albert. 2014. Climate change sensitivity index for Pacific salmon habitat in southeast
- 1475 Shanley, C. S., S. Pyare, M. I. Goldstein, P. B. Alaback, D. M. Albert, C. M. Beier, T. J. Brinkman, R. T. Edwards, E. Hood, A. MacKinnon, M. V. McPhee, T. M. Patterson, L. H. Suring, D. A. Tallmon, and M. S. Wipfli. 2015. Climate change implications in the northern coastal temperate rainforest of North America. *Climatic Change* 130:155-170.
- 1476 Sharma, R., and M. Liermann. 2010. Using hierarchical models to estimate effects of ocean anomalies on north-west Pacific Chinook salmon *Oncorhynchus tshawytscha* recruitment. *Journal of Fish Biology* 77:1948-1963.
- 1477 Sharma, R., and T. P. Quinn. 2012. Linkages between life history type and migration pathways in freshwater and marine environments for Chinook salmon, *Oncorhynchus tshawytscha*. *Acta Oecologica-International Journal of*
- 1478 Sharma, R., L. A. Velez-Espino, A. C. Wertheimer, N. Mantua, and R. C. Francis. 2013. Relating spatial and temporal scales of climate and ocean variability to survival of Pacific Northwest Chinook salmon (*Oncorhynchus*
- 1479 Sharpe, C., C. Carr-Harris, M. Arbeider, S. M. Wilson, and J. W. Moore. 2019. Estuary habitat associations for juvenile Pacific salmon and pelagic fish: Implications for coastal planning processes. *Aquatic Conservation-Marine*
- 1480 Sheehan, T. F., D. G. Reddin, G. Chaput, and M. D. Renkawitz. 2012. SALSEA North America: A pelagic ecosystem survey targeting Atlantic salmon in the Northwest Atlantic. *Ices Journal of Marine Science* 69:1580-1588.
- 1481 Sheldon, K. A., and J. S. Richardson. 2022. Season-specific survival rates and densities of coastal cutthroat trout across stream sizes in southwestern British Columbia. *Ecology of Freshwater Fish* 31:102-117.
- 1482 Shelton, A. O., G. H. Sullaway, E. J. Ward, B. E. Feist, K. A. Somers, V. J. Tuttle, J. T. Watson, and W. H. Satterthwaite. 2021. Redistribution of salmon populations in the northeast Pacific ocean in response to climate.
- 1483 Shelton, A. O., W. H. Satterthwaite, E. J. Ward, B. E. Feist, and B. Burke. 2019. Using hierarchical models to estimate stock-specific and seasonal variation in ocean distribution, survivorship, and aggregate abundance of fall run Chinook salmon. *Canadian Journal of Fisheries and Aquatic Sciences* 76:95-108.
- 1484 Shephard, S., and P. Gargan. 2021. Wild Atlantic salmon exposed to sea lice from aquaculture show reduced marine survival and modified response to ocean climate. *Ices Journal of Marine Science* 78:368-376.
- 1485 Sherker, Z. T., K. Pellett, J. Atkinson, J. Damborg, and A. W. Trites. 2021. Pacific Great Blue Herons (*Ardea herodias fannini*) consume thousands of juvenile salmon (*Oncorhynchus* spp.). *Canadian Journal of Zoology* 99:349-361.
- 1486 Shi, H., M. García-Reyes, M. G. Jacox, R. R. Rykaczewski, B. A. Black, S. J. Bograd, and W. J. Sydeman. 2021. Co-occurrence of California Drought and Northeast Pacific Marine Heatwaves Under Climate Change. *Geophysical*
- 1487 Shitova, M. V., Y. N. Khokhlov, A. I. Nikiforov, P. K. Afanasyev, S. Y. Orlova, A. N. Elnikov, A. V. Bugaev, T. A. Rakitskaya, V. D. Prohorovskaya, T. V. Malinina, D. V. Politov, K. I. Afanasyev, G. A. Rubtsova, and L. A. Zhivotovsky. 2020. Differentiation of Asian North Chum Salmon (*Oncorhynchus keta*W.) Based on Microsatellite Markers.
- 1488 Shrimpton, J. M., K. D. Warren, N. L. Todd, C. J. McRae, G. J. Glova, K. H. Telmer, and A. D. Clarke. 2014. Freshwater movement patterns by juvenile Pacific salmon *Oncorhynchus* spp. before they migrate to the ocean:
- 1489 Shuntov, V. P., and O. A. Ivanov. 2019. Climate Change and the Current Status of Biota in Russian Waters of the Far Eastern Seas. *Russian Journal of Marine Biology* 45:495-510.
- 1490 Shuntov, V. P., O. S. Temnykh, and O. A. Ivanov. 2018. On the persistence of stereotypes concerning the marine ecology of Pacific salmon (*Oncorhynchus* spp.). *Russian Journal of Marine Biology* 43:507-534.
- 1491 Shuntov, V. P., O. S. Temnykh, and S. V. Naydenko. 2019. More on the Factors that Limit the Abundance of Pacific Salmon (*Oncorhynchus* spp., Family Salmonidae) during the Ocean Phase of Their Life History. *Russian Journal of*
- 1492 Shuter, B. J., A. G. Finstad, I. P. Helland, I. Zweimuller, and F. Holker. 2012. The role of winter phenology in shaping the ecology of freshwater fish and their sensitivities to climate change. *Aquatic Sciences* 74:637-657.
- 1493 Siedlecki, S. A., D. Pilcher, E. M. Howard, C. Deutsch, P. MacCready, E. L. Norton, H. Frenzel, J. Newton, R. A. Feely, S. R. Alin, and T. Klinger. 2021. Coastal processes modify projections of some climate-driven stressors in the

- 1494 Siegel, J. E., L. G. Crozier, L. E. Wiesebron, and D. L. Widener. 2021. Environmentally triggered shifts in steelhead migration behavior and consequences for survival in the mid-Columbia River. *Plos One* 16.
- 1495 Siegel, J. E., M. D. Adkison, and M. V. McPhee. 2018. Changing maturation reaction norms and the effects of growth history in Alaskan Chinook salmon. *Marine Ecology Progress Series* 595:187-202.
- 1496 Siegel, J. E., M. V. McPhee, and M. D. Adkison. 2017. Evidence that marine temperatures influence growth and maturation of western Alaskan Chinook salmon. *Marine and Coastal Fisheries* 9:441-456.
- 1497 Siegel, J., and L. Crozier. 2020. Upstream survival of Snake River spring/summer-run Chinook salmon in relation to travel time and conditions at Little Goose Dam. Memo for WRC, National Marine Fisheries Service.
- 1498 Silva, A. T., K. M. Baerum, R. D. Hedger, H. Baktoft, H. P. Fjeldstad, K. O. Gjelland, F. Okland, and T. Forseth. 2020. The effects of hydrodynamics on the three-dimensional downstream migratory movement of Atlantic salmon.
- 1499 Simmons, J. B., T. Campbell, C. L. Jerde, S. Chandra, W. Cowan, Z. Hogan, J. Saenz, and K. Shoemaker. 2020. Population dynamics of threatened Lahontan cutthroat trout in Summit Lake, Nevada. *Scientific Reports* 10.
- 1500 Simmons, O. M., J. R. Britton, P. K. Gillingham, and S. D. Gregory. 2020. Influence of environmental and biological factors on the overwinter growth rate of Atlantic salmon *Salmo salar* parr in a UK chalk stream. *Ecology of*
- 1501 Simmons, O. M., J. R. Britton, P. K. Gillingham, M. Nevoux, W. D. Riley, E. Rivot, and S. D. Gregory. 2021. Predicting how environmental conditions and smolt body length when entering the marine environment impact individual Atlantic salmon *Salmo salar* adult return rates. *Journal of Fish Biology*.
- 1502 Simmons, O. M., S. D. Gregory, P. K. Gillingham, W. D. Riley, L. J. Scott, and J. R. Britton. 2021. Biological and environmental influences on the migration phenology of Atlantic salmon *Salmo salar* smolts in a chalk stream in
- 1503 Simpson, S. D., P. L. Munday, M. L. Wittenrich, R. Manassa, D. L. Dixon, M. Gagliano, and H. Y. Yan. 2011. Ocean acidification erodes crucial auditory behaviour in a marine fish. *Biol Lett* 7:917-920.
- 1504 Singer, G. P., E. D. Chapman, A. J. Ammann, A. P. Klimley, A. L. Rypel, and N. A. Fangue. 2020. Historic drought influences outmigration dynamics of juvenile fall and spring-run Chinook Salmon. *Environmental Biology of Fishes*
- 1505 Sinnatamby, R. N., A. Cantin, and J. R. Post. 2019. Threats to at-risk salmonids of the Canadian Rocky Mountain region. *Ecology of Freshwater Fish*:18.
- 1506 Sissener, N. H., K. Hamre, P. G. Fjellidal, A. J. P. Philip, M. Espe, L. Miao, E. Hoglund, C. Sorensen, K. H. Skjaerven, E. Holen, S. Subramanian, V. Vikesa, B. Norberg, and S. C. Remo. 2021. Can improved nutrition for Atlantic salmon in freshwater increase fish robustness, survival and growth after seawater transfer? *Aquaculture* 542.
- 1507 Siwicke, K. A., J. H. Moss, B. R. Beckman, and C. Ladd. 2019. Effects of the Sitka Eddy on juvenile pink salmon in the eastern Gulf of Alaska. *Deep-Sea Research Part II-Topical Studies in Oceanography* 165:348-363.
- 1508 Skilbrei, O. T., V. Wennevik, G. Dahle, B. Barlaup, and T. Wiers. 2010. Delayed smolt migration of stocked Atlantic salmon parr. *Fisheries Management and Ecology* 17:493-500.
- 1509 Sloat, M. R., and A. M. K. Osterback. 2013. Maximum stream temperature and the occurrence, abundance, and behavior of steelhead trout (*Oncorhynchus mykiss*) in a southern California stream. *Canadian Journal of Fisheries*
- 1510 Sloat, M. R., D. J. Fraser, J. B. Dunham, J. A. Falke, C. E. Jordan, J. R. McMillan, and H. A. Ohms. 2014. Ecological and evolutionary patterns of freshwater maturation in Pacific and Atlantic salmonines. *Reviews in Fish Biology and*
- 1511 Smialek, N., J. Pander, and J. Geist. 2021. Environmental threats and conservation implications for Atlantic salmon and brown trout during their critical freshwater phases of spawning, egg development and juvenile emergence.
- 1512 Smith, D. P., J. Schnieders, L. Marshall, K. Melchor, S. Wolfe, D. Campbell, A. French, J. Randolph, M. Whitaker, J. Klein, C. Steinmetz, and R. Kwan. 2021. Influence of a Post-dam Sediment Pulse and Post-fire Debris Flows on Steelhead Spawning Gravel in the Carmel River, California. *Frontiers in Earth Science* 9.
- 1513 Snover, A. K., N. J. Mantua, J. S. Littell, M. A. Alexander, M. M. McClure, and J. Nye. 2013. Choosing and using climate-change scenarios for ecological-impact assessments and conservation decisions. *Conservation Biology*
- 1514 Snow, C. G., and R. D. Mann. 2019. Identification of Summer-Run Chinook Salmon Spawning Areas in the Main-Stem Columbia River Upstream of Wells Dam, Washington. *North American Journal of Fisheries Management*
- 1515 Snyder, M. N., N. H. Schumaker, J. B. Dunham, M. L. Keefer, P. Leinenbach, A. Brookes, J. Palmer, J. Wu, D. Keenan, and J. L. Ebersole. 2020. Assessing contributions of cold-water refuges to reproductive migration corridor conditions for adult salmon and steelhead trout in the Columbia River, USA. *Journal of Ecohydraulics*:1-13.
- 1516 Sobocinski, K. L. 2021. The State of the Salish Sea. in G. Broadhurst and N. J. K. Baloy, editors. *Salish Sea Institute, Western Washington University*. <https://doi.org/10.25710/vfhh-3a69>.
- 1517 Sobocinski, K. L., C. M. Greene, and M. W. Schmidt. 2018. Using a qualitative model to explore the impacts of ecosystem and anthropogenic drivers upon declining marine survival in Pacific salmon. *Environmental*

- 1518 Sobocinski, K. L., C. M. Greene, J. H. Anderson, N. W. Kendall, M. W. Schmidt, M. S. Zimmerman, I. M. Kemp, S. Kim, and C. P. Ruff. 2021. A hypothesis-driven statistical approach for identifying ecosystem indicators of coho and
- 1519 Sobocinski, K. L., N. W. Kendall, C. M. Greene, and M. W. Schmidt. 2020. Ecosystem indicators of marine survival in Puget Sound steelhead trout. *Progress in Oceanography* 188.
- 1520 Sogard, S. M., J. E. Merz, W. H. Satterthwaite, M. P. Beakes, D. R. Swank, E. M. Collins, R. G. Titus, and M. Mangel. 2012. Contrasts in habitat characteristics and life history patterns of *Oncorhynchus mykiss* in California's Central Coast and Central Valley. *Transactions of the American Fisheries Society* 141:747-760.
- 1521 Soininen, N., A. Belinskij, A. Vainikka, and H. Huuskonen. 2019. Bringing back ecological flows: migratory fish, hydropower and legal maladaptivity in the governance of Finnish rivers. *Water International* 44:321-336.
- 1522 Sokolova, I. M., M. Frederich, R. Bagwe, G. Lannig, and A. A. Sukhotin. 2012. Energy homeostasis as an integrative tool for assessing limits of environmental stress tolerance in aquatic invertebrates. *Marine Environmental*
- 1523 Sol, S. Y., B. Anulacion, D. P. Lomax, P. Chittaro, P. Moran, G. M. Ylitalo, A. Hanson, C. Corbett, and L. L. Johnson. 2021. Juvenile Salmon Ecology in Tidal Freshwater Wetlands in the Lower Columbia River Estuary.
- 1524 Sol, S. Y., D. P. Lomax, A. C. Hanson, C. Corbett, and L. L. Johnson. 2021. Fish Communities in the Tidal Freshwater Wetlands of the Lower Columbia River. *Northwest Science* 94:208-230.
- 1525 Somero, G. N., J. M. Beers, F. Chan, T. M. Hill, T. Klinger, and S. Y. Litvin. 2016. What changes in the carbonate system, oxygen, and temperature portend for the northeastern Pacific Ocean: A physiological perspective.
- 1526 Sorensen, C., P. L. Munday, and G. E. Nilsson. 2014. Aerobic vs. anaerobic scope: sibling species of fish indicate that temperature dependence of hypoxia tolerance can predict future survival. *Global Change Biology* 20:724-729.
- 1527 Soto, D. X., C. N. Trueman, K. M. Samways, M. J. Dadswell, and R. A. Cunjak. 2018. Ocean warming cannot explain synchronous declines in North American Atlantic salmon populations. *Marine Ecology Progress Series* 601:203-
- 1528 Soto, E., A. Camus, S. S. Yun, T. Kurobe, J. H. Leary, T. G. Rosser, J. A. Dill-Okubo, A. C. Nyaoke, M. Adkison, A. Renger, and T. F. F. Ng. 2020. First Isolation of a Novel Aquatic Flavivirus from Chinook Salmon (*Oncorhynchus tshawytscha*) and Its In Vivo Replication in a Piscine Animal Model. *Journal of Virology* 94.
- 1529 Soyut, H., S. Beydemir, S. B. Ceyhun, O. Erdogan, and E. D. Kaya. 2012. Changes in carbonic anhydrase activity and gene expression of Hsp70 in rainbow trout (*Oncorhynchus mykiss*) muscle after exposure to some metals. *Turkish*
- 1530 Spanjer, A. R., P. W. Moran, K. A. Larsen, L. A. Wetzel, A. G. Hansen, and D. A. Beauchamp. 2018. Juvenile coho salmon growth and health in streams across an urbanization gradient. *Science of the Total Environment* 625:1003-
- 1531 Sparks, M. M., J. A. Falke, T. P. Quinn, M. D. Adkison, D. E. Schindler, K. Bartz, D. Young, and P. A. H. Westley. 2019. Influences of spawning timing, water temperature, and climatic warming on early life history phenology in western Alaska sockeye salmon. *Canadian Journal of Fisheries and Aquatic Sciences* 76:123-135.
- 1532 Sparks, M. M., P. A. H. Westley, J. A. Falke, and T. P. Quinn. 2017. Thermal adaptation and phenotypic plasticity in a warming world: Insights from common garden experiments on Alaskan sockeye salmon. *Glob Chang Biol*
- 1533 Spence, B. C., and E. J. Dick. 2014. Geographic variation in environmental factors regulating outmigration timing of coho salmon (*Oncorhynchus kisutch*) smolts. *Canadian Journal of Fisheries and Aquatic Sciences* 71:56-69.
- 1534 Spence, B. C., and J. D. Hall. 2010. Spatiotemporal patterns in migration timing of coho salmon (*Oncorhynchus kisutch*) smolts in North America. *Canadian Journal of Fisheries and Aquatic Sciences* 67:1316-1334.
- 1535 Springer, A. M., and G. B. van Vliet. 2014. Climate change, pink salmon, and the nexus between bottom-up and top-down forcing in the subarctic Pacific Ocean and Bering Sea. *Proceedings of the National Academy of Sciences*
- 1536 Sridharan, V. K. 2020. A Multi-Scale Model-Based Inquiry into Ecological Data for Watershed Management Applications. *Watershed Management* 2020:151-161.
- 1537 Stabeno, P. J., E. V. Farley, N. B. Kachel, S. Moore, C. W. Mordy, J. M. Napp, J. E. Overland, A. I. Pinchuk, and M. F. Sigler. 2012. A comparison of the physics of the northern and southern shelves of the eastern Bering Sea and some implications for the ecosystem. *Deep-Sea Research Part II-Topical Studies in Oceanography* 65-70:14-30.
- 1538 Stachura, M. M., N. J. Mantua, and M. D. Scheuerell. 2014. Oceanographic influences on patterns in North Pacific salmon abundance. *Canadian Journal of Fisheries and Aquatic Sciences* 71:226-235.
- 1539 Stanford, B., K. D. Holl, D. B. Herbst, and E. Zavaleta. 2020. In-stream habitat and macroinvertebrate responses to riparian corridor length in rangeland streams. *Restoration Ecology* 28:173-184.
- 1540 Staudinger, M. D., N. B. Grimm, A. Staudt, S. L. Carter, F. S. C. III, P. Kareiva, M. Ruckelshaus, and B. A. Stein. 2012. Impacts of climate change on biodiversity, ecosystems, and ecosystem services: Technical input to the 2013
- 1541 Steel, A. E., J. J. Anderson, B. Mulvey, and D. L. Smith. 2020. Applying the mean free-path length model to juvenile Chinook salmon migrating in the Sacramento River, California. *Environmental Biology of Fishes* 103:1603-1617.

- 1542 Steel, E. A., A. Marsha, A. H. Fullerton, J. D. Olden, N. K. Larkin, S. Y. Lee, and A. Ferguson. 2019. Thermal landscapes in a changing climate: biological implications of water temperature patterns in an extreme year.
- 1543 Steel, E. A., A. Muldoon, R. L. Flitcroft, J. C. Firman, K. J. Anlauf-Dunn, K. M. Burnett, and R. J. Danehy. 2017. Current landscapes and legacies of land-use past: understanding the distribution of juvenile coho salmon (*Oncorhynchus kisutch*) and their habitats along the Oregon Coast, USA. *Canadian Journal of Fisheries and Aquatic*
- 1544 Steel, E. A., T. J. Beechie, C. E. Torgersen, and A. H. Fullerton. 2017. Envisioning, quantifying, and managing thermal regimes on river networks. *Bioscience* 67:506-522.
- 1545 Steinacher, M., F. Joos, T. L. Frolicher, L. Bopp, P. Cadule, V. Cocco, S. C. Doney, M. Gehlen, K. Lindsay, J. K. Moore, B. Schneider, and J. Segschneider. 2010. Projected 21st century decrease in marine productivity: A multi-model
- 1546 Stelkens, R. B., G. Jaffuel, M. Escher, and C. Wedekind. 2012. Genetic and phenotypic population divergence on a microgeographic scale in brown trout. *Molecular Ecology* 21:2896-2915.
- 1547 Stelzer, J. A. A., J. P. Mesman, R. Adrian, and B. W. Ibelings. 2021. Early warning signals of regime shifts for aquatic systems: Can experiments help to bridge the gap between theory and real-world application? *Ecological*
- 1548 Stenhouse, S. A., C. E. Bean, W. R. Chesney, and M. S. Pisano. 2012. Water temperature thresholds for coho salmon in a spring-fed river, Siskiyou County, California. *California Fish and Game* 98:19-37.
- 1549 Stevens, J., J. M. Voorhees, N. Huysman, E. Krebs, and M. E. Barnes. 2021. Effects of Two Activated Milt Residence Times on Landlocked Fall Chinook Salmon Egg Survival to the Eyed Stage of Development. *North American Journal*
- 1550 Stewart, I. T., J. Rogers, and A. Graham. 2020. Water security under severe drought and climate change: Disparate impacts of the recent severe drought on environmental flows and water supplies in Central California. *Journal of*
- 1551 Stewart, J. D., J. W. Durban, H. Fearnbach, L. G. Barrett-Lennard, P. K. Casler, E. J. Ward, and D. R. Dapp. 2021. Survival of the fattest: linking body condition to prey availability and survivorship of killer whales. *Ecosphere* 12.
- 1552 Stich, D. S., M. T. Kinnison, J. F. Kocik, and J. D. Zydlewski. 2015. Initiation of migration and movement rates of Atlantic salmon smolts in fresh water. *Canadian Journal of Fisheries and Aquatic Sciences* 72:1339-1351.
- 1553 Stich, H. B., and A. Brinker. 2010. Oligotrophication outweighs effects of global warming in a large, deep, stratified lake ecosystem. *Global Change Biology* 16:877-888.
- 1554 Stige, L. C., K. O. Helgesen, H. Viljugrein, and L. Qviller. 2021. A statistical mechanistic approach including temperature and salinity effects to improve salmon lice modelling of infestation pressure. *Aquaculture*
- 1555 Stitt, B. C., G. Burness, K. A. Burgomaster, S. Currie, J. L. McDermid, and C. C. Wilson. 2014. Intraspecific variation in thermal tolerance and acclimation capacity in brook trout (*Salvelinus fontinalis*): Physiological implications for climate change. *Physiological and Biochemical Zoology* 87:15-29.
- 1556 Stock, B. C., E. J. Ward, T. Eguchi, J. Jannot, J. T. Thorson, B. E. Feist, and B. X. Semmens. 2020. Comparing predictions of fisheries bycatch using multiple spatiotemporal species distribution model frameworks. *Canadian*
- 1557 Storch, A. J., S. L. Haeseker, G. Scheer, J. A. McCann, B. R. Chockley, T. Copeland, and R. B. Lessard. 2021. Comment: Associations among Fish Length, Dam Passage History, and Survival to Adulthood in Two At-Risk Species of Pacific Salmon. *Transactions of the American Fisheries Society* 150:189-195.
- 1558 Strait, J. T., L. A. Eby, R. P. Kovach, C. C. Muhlfeld, M. C. Boyer, S. J. Amish, S. Smith, W. H. Lowe, and G. Luikart. 2021. Hybridization alters growth and migratory life-history expression of native trout. *Evolutionary Applications*
- 1559 Strange, J. S. 2010. Upper thermal limits to migration in adult Chinook salmon: Evidence from the Klamath River Basin. *Transactions of the American Fisheries Society* 139:1091-1108.
- 1560 Strange, J. S. 2012. Migration strategies of adult Chinook salmon runs in response to diverse environmental conditions in the Klamath River Basin. *Transactions of the American Fisheries Society* 141:1622-1636.
- 1561 Striberny, A., D. E. Lauritzen, J. Fuentes, M. A. Campinho, P. Gaetano, V. Duarte, D. G. Hazlerigg, and E. H. Jorgensen. 2021. More than one way to smoltify a salmon? Effects of dietary and light treatment on smolt development and seawater growth performance in Atlantic salmon. *Aquaculture* 532.
- 1562 Strom, J. F., A. H. Rikardsen, S. E. Campana, D. Righton, J. Carr, K. Aarestrup, M. J. W. Stokesbury, P. Gargan, P. C. Javierre, and E. B. Thorstad. 2019. Ocean predation and mortality of adult Atlantic salmon. *Scientific Reports* 9:11.
- 1563 Strom, J. F., E. B. Thorstad, and A. H. Rikardsen. 2020. Thermal habitat of adult Atlantic salmon *Salmo salar* in a warming ocean. *Journal of Fish Biology* 96:10.
- 1564 Strole, L. C., R. Filgueira, B. G. Hatcher, S. Denny, X. Bordeleau, F. G. Whoriskey, and G. T. Crossin. 2018. The effect of environmental conditions on Atlantic salmon smolts' (*Salmo salar*) bioenergetic requirements and migration through an inland sea. *Environmental Biology of Fishes* 101:1467-1482.
- 1565 Strowbridge, N., S. L. Northrup, M. L. Earhart, T. S. Blanchard, and P. M. Schulte. 2021. Acute measures of upper thermal and hypoxia tolerance are not reliable predictors of mortality following environmental challenges in

- 1566 Sturba, M. A. 2021. Examining the Combined Impacts of Rapid Senescence and a Low Water Stressor on  
1567 Sturdevant, M. V., J. A. Orsi, and E. A. Fergusson. 2012. Diets and trophic linkages of epipelagic fish predators in  
coastal Southeast Alaska during a period of warm and cold climate years, 1997-2011. *Marine and Coastal Fisheries*  
1568 Sturrock, A. M., S. M. Carlson, J. D. Wikert, T. Heyne, S. Nussle, J. E. Merz, H. J. W. Sturrock, and R. C. Johnson.  
2020. Unnatural selection of salmon life histories in a modified riverscape. *Global Change Biology* 26:1235-1247.
- 1569 Suchman, C. L., R. D. Brodeur, E. A. Daly, and R. L. Emmett. 2012. Large medusae in surface waters of the Northern  
California Current: Variability in relation to environmental conditions. *Hydrobiologia* 690:113-125.
- 1570 Suggitt, A. J., R. J. Wilson, N. J. B. Isaac, C. M. Beale, A. G. Auffret, T. August, J. J. Bennie, H. Q. P. Crick, S. Duffield,  
R. Fox, J. J. Hopkins, N. A. Macgregor, M. D. Morecroft, K. J. Walker, and I. M. D. Maclean. 2018. Extinction risk  
from climate change is reduced by microclimatic buffering. *Nature Climate Change* 8:713-717.
- 1571 Sullaway, G. H., A. O. Shelton, and J. F. Samhouri. 2021. Synchrony erodes spatial portfolios of an anadromous fish  
and alters availability for resource users. *Journal of Animal Ecology* 90:2692-2703.
- 1572 Sullivan, A. P., D. W. Bird, and G. H. Perry. 2017. Human behaviour as a long-term ecological driver of non-human  
1573 Sullivan, C. J., J. C. Vokoun, A. M. Helton, M. A. Briggs, and B. L. Kurylyk. 2021. An ecohydrological typology for  
thermal refuges in streams and rivers. *Ecohydrology* 14.
- 1574 Sullivan, R. M., and J. P. Hileman. 2019. Effects of managed flows on Chinook Salmon (*Oncorhynchus tshawytscha*)  
in relation to run-timing, fertility, and fluctuations in water temperature and flow volume. *California Fish and*  
1575 Sullivan, R. M., and J. P. Hileman. 2020. Comparative Analyses of Upstream Migration in a Multispecies  
Assemblage of Fish in Response to Highly Managed Flow Regimes. *California Fish and Game* 106:99-138.
- 1576 Sundt-Hansen, L. E., R. D. Hedger, O. Ugedal, O. H. Diserud, A. G. Finstad, J. F. Sauterleute, L. Tofte, K. Alfredsen,  
and T. Forseth. 2018. Modelling climate change effects on Atlantic salmon: Implications for mitigation in regulated  
1577 Sundt, H., K. Alfredsen, J. Museth, and T. Forseth. 2022. Combining green LiDAR bathymetry, aerial images and  
telemetry data to derive mesoscale habitat characteristics for European grayling and brown trout in a Norwegian  
1578 Suryan, R. M., M. L. Arimitsu, H. A. Coletti, R. R. Hopcroft, M. R. Lindeberg, S. J. Barbeaux, S. D. Batten, W. J. Burt,  
M. A. Bishop, J. L. Bodkin, R. Brenner, R. W. Campbell, D. A. Cushing, S. L. Danielson, M. W. Dorn, B. Drummond, D.  
Esler, T. Gelatt, D. H. Hanselman, S. A. Hatch, S. Haught, K. Holderied, K. Iken, D. B. Irons, A. B. Kettle, D. G.  
Kimmel, B. Konar, K. J. Kuletz, B. J. Laurel, J. M. Maniscalco, C. Matkin, C. A. E. McKinstry, D. H. Monson, J. R.  
Moran, D. Olsen, W. A. Palsson, W. S. Pegau, J. F. Piatt, L. A. Rogers, N. A. Rojek, A. Schaefer, I. B. Spies, J. M.  
Straley, S. L. Strom, K. L. Sweeney, M. Szymkowiak, B. P. Weitzman, E. M. Yasumiishi, and S. G. Zador. 2021.
- 1579 Sutcliffe, R. L., S. R. Li, M. J. H. Gilbert, P. M. Schulte, K. M. Miller, and A. P. Farrell. 2020. A rapid intrinsic heart  
rate resetting response with thermal acclimation in rainbow trout, *Oncorhynchus mykiss*. *Journal of Experimental*  
1580 Sutton, R., and T. Soto. 2012. Juvenile coho salmon behavioural characteristics in Klamath river summer thermal  
refugia. *River Research and Applications* 28:338-346.
- 1581 Svavarsdottir, F. R., M. A. Freeman, T. Antonsson, F. Arnason, and A. Kristmundsson. 2021. The presence of  
sporogonic stages of *Tetracapsuloides bryosalmonae* in Icelandic salmonids detected using in situ hybridisation.
- 1582 Svenning, M. A., M. Falkegard, J. B. Dempson, M. Power, B. J. Bardsen, G. Gudbergsson, and P. Fauchald. 2022.  
Temporal changes in the relative abundance of anadromous Arctic charr, brown trout, and Atlantic salmon in  
northern Europe: Do they reflect changing climates? *Freshwater Biology* 67:64-77.
- 1583 Swanson, S. T., D. D. Tullos, and R. A. Goodwin. 2020. Experiments on the hydraulics and swimming responses of  
juvenile Chinook Salmon encountering a floating guidance structure. *River Research and Applications* 36:1633-  
1584 Sweeney-Bergen, E. K., D. Macintyre, and J. W. Moore. 2021. Ontogenetic habitat shifts and vulnerability: lake-  
outlet-spawning sockeye salmon (*Oncorhynchus nerka*) sensitivity to habitat connectivity and hydrologic change.
- 1585 Sydeman, W. J., J. A. Santora, S. A. Thompson, B. Marinovic, and E. Di Lorenzo. 2013. Increasing variance in North  
Pacific climate relates to unprecedented ecosystem variability off California. *Global Change Biology* 19:1662-1675.
- 1586 Sydeman, W. J., S. A. Thompson, J. F. Piatt, M. García-Reyes, S. Zador, J. C. Williams, M. Romano, and H. M.  
Renner. 2017. Regionalizing indicators for marine ecosystems: Bering Sea–Aleutian Island seabirds, climate, and  
1587 Sydeman, W. J., S. A. Thompson, M. Garcia-Reyes, M. Kahru, W. T. Peterson, and J. L. Largier. 2014. Multivariate  
ocean-climate indicators (MOCI) for the central California Current: Environmental change, 1990-2010. *Progress in*  
1588 Sykes, G. E., and J. M. Shrimpton. 2010. Effect of temperature and current manipulation on smolting in Chinook  
salmon (*Oncorhynchus tshawytscha*): The relationship between migratory behaviour and physiological  
development. *Canadian Journal of Fisheries and Aquatic Sciences* 67:191-201.



- 1589 Sylvester, E. V. A., R. G. Beiko, P. Bentzen, I. Paterson, J. B. Horne, B. Watson, S. Lehnert, S. Duffy, M. Clement, M. J. Robertson, and I. R. Bradbury. 2018. Environmental extremes drive population structure at the northern range limit of Atlantic salmon in North America. *Molecular Ecology* 27:4026-4040.
- 1590 Syrova, E., M. Palikova, J. Mendel, V. Seidlova, I. Papezikova, H. Schmidt-Posthaus, K. Somerlikova, H. Minarova, L. Mares, I. Mikulikova, J. Pikula, and J. Mares. 2020. Field study indicating susceptibility differences between salmonid species and their lineages to proliferative kidney disease. *Journal of Fish Diseases* 43:1201-1211.
- 1591 Szabo-Meszaros, M., A. T. Silva, K. M. Baerum, H. Baktoft, K. Alfredsen, R. D. Hedger, F. Okland, K. O. Gjelland, H. P. Fjeldstad, O. Calles, and T. Forseth. 2021. Validation of a Swimming Direction Model for the Downstream
- 1592 Taal, I., M. Kesler, L. Saks, M. Rohtla, A. Verliin, R. Svirgsden, K. Jurgens, M. Vetemaa, and T. Saat. 2014. Evidence for an autumn downstream migration of Atlantic salmon *Salmo salar* (Linnaeus) and brown trout *Salmo trutta* (Linnaeus) parr to the Baltic Sea. *Helgoland Marine Research* 68:373-377.
- 1593 Tabor, R. A., B. A. Footen, K. L. Fresh, M. T. Celedonia, F. Mejia, D. L. Low, and L. Park. 2007. Smallmouth bass and largemouth bass predation on juvenile Chinook salmon and other salmonids in the Lake Washington Basin. *North*
- 1594 Taguchi, M., and J. C. Liao. 2011. Rainbow trout consume less oxygen in turbulence: The energetics of swimming behaviors at different speeds. *Journal of Experimental Biology* 214:1428-1436.
- 1595 Takata, L., T. R. Sommer, J. Louise Conrad, and B. M. Schreier. 2017. Rearing and migration of juvenile Chinook salmon (*Oncorhynchus tshawytscha*) in a large river floodplain. *Environmental Biology of Fishes* 100:1105-1120.
- 1596 Talloni-Alvarez, N. E., U. R. Sumaila, P. Le Billon, and W. W. L. Cheung. 2019. Climate change impact on Canada's Pacific marine ecosystem: The current state of knowledge. *Marine Policy* 104:163-176.
- 1597 Tan, E. K., C. Wongwarangkana, S. Kinoshita, Y. Suzuki, K. Oshima, M. Hattori, T. Ineno, K. Tamaki, A. Kera, K. Muto, T. Yada, S. Kitamura, S. Asakawa, and S. Watabe. 2012. Global gene expression analysis of gill tissues from normal and thermally selected strains of rainbow trout. *Fisheries Science* 78:1041-1049.
- 1598 Tanaka, K. R., K. S. Van Houtan, E. Mailander, B. S. Dias, C. Galginitis, J. O'Sullivan, C. G. Lowe, and S. J. Jorgensen. 2021. North Pacific warming shifts the juvenile range of a marine apex predator. *Scientific Reports* 11:3373.
- 1599 Tang, C. L., B. T. Crosby, J. M. Wheaton, and T. C. Piechota. 2012. Assessing streamflow sensitivity to temperature increases in the Salmon River Basin, Idaho. *Global and Planetary Change* 88-89:32-44.
- 1600 Tashie, A., T. Pavelsky, and R. E. Emanuel. 2020. Spatial and Temporal Patterns in Baseflow Recession in the Continental United States. *Water Resources Research* 56.
- 1601 Tattam, I. A., and J. R. Ruzycki. 2020. Smolt Transportation Influences Straying of Wild and Hatchery Snake River Steelhead into the John Day River. *Transactions of the American Fisheries Society* 149:284-297.
- 1602 Taugbol, A., K. Olstad, K. M. Baerum, and J. Museth. 2019. Swimming performance of brown trout and grayling show species-specific responses to changes in temperature. *Ecology of Freshwater Fish* 28:241-246.
- 1603 Taylor, B. R., C. Macinnis, and T. A. Floyd. 2010. Influence of rainfall and beaver dams on upstream movement of spawning Atlantic salmon in a restored brook in Nova Scotia, Canada. *River Research and Applications* 26:183-193.
- 1604 Teel, D. J., B. J. Burke, D. R. Kuligowski, C. A. Morgan, and D. M. Van Doornik. 2015. Genetic Identification of Chinook Salmon: Stock-Specific Distributions of Juveniles along the Washington and Oregon Coasts. *Marine and*
- 1605 Teffer, A. K., A. L. Bass, K. M. Miller, D. A. Patterson, F. Juanes, and S. G. Hinch. 2018. Infections, fisheries capture, temperature, and host responses: Multistressor influences on survival and behaviour of adult Chinook salmon.
- 1606 Teffer, A. K., S. G. Hinch, K. M. Miller, D. A. Patterson, A. L. Bass, S. J. Cooke, A. P. Farrell, T. D. Beacham, J. M. Chapman, and F. Juanes. 2022. Host-pathogen-environment interactions predict survival outcomes of adult sockeye salmon (*Oncorhynchus nerka*) released from fisheries. *Molecular Ecology* 31:134-160.
- 1607 Teffer, A. K., S. Hinch, K. Miller, K. Jeffries, D. Patterson, S. Cooke, A. Farrell, K. H. Kaukinen, S. R. Li, and F. Juanes. 2019. Cumulative Effects of Thermal and Fisheries Stressors Reveal Sex-Specific Effects on Infection Development and Early Mortality of Adult Coho Salmon (*Oncorhynchus kisutch*). *Physiological and Biochemical Zoology* 92:505-
- 1608 Teichert, M. A. K., E. Kvingedal, T. Forseth, O. Ugedal, and A. G. Finstad. 2010. Effects of discharge and local density on the growth of juvenile Atlantic salmon *Salmo salar*. *Journal of Fish Biology* 76:1751-1769.
- 1609 Teichert, N., J. P. Benitez, A. Dierckx, S. Tetard, E. de Oliveira, T. Trancart, E. Feunteun, and M. Ovidio. 2020. Development of an accurate model to predict the phenology of Atlantic salmon smolt spring migration. *Aquatic*
- 1610 Telesetsky, A. 2020. United States Law and Policy for Sharing Transboundary, Highly Migratory, and Straddling Stock Fishery Resources. *Korean Journal of International and Comparative Law* 8:205-225.
- 1611 Teletchea, F., and P. Fontaine. 2010. Comparison of early life-stage strategies in temperate freshwater fish species: Trade-offs are directed towards first feeding of larvae in spring and early summer. *Journal of Fish Biology*

1612 Teo, S. L. H., L. W. Botsford, and A. Hastings. 2009. Spatio-temporal covariability in coho salmon (*Oncorhynchus kisutch*) survival, from California to southeast Alaska. *Deep-Sea Research Part II-Topical Studies in Oceanography*

1613 Terzi, E., and B. Verep. 2012. Effects of water hardness and temperature on the acute toxicity of mercuric chloride on rainbow trout (*Oncorhynchus mykiss*). *Toxicology and Industrial Health* 28:499-504.

1614 Thalmann, H. L., E. A. Daly, and R. D. Brodeur. 2020. Two Anomalously Warm Years in the Northern California Current: Impacts on Early Marine Steelhead Diet Composition, Morphology, and Potential Survival. *Transactions of*

1615 Thayer, J. A., J. C. Field, and W. J. Sydeman. 2014. Changes in California Chinook salmon diet over the past 50 years: relevance to the recent population crash. *Marine Ecology Progress Series* 498:249-U561.

1616 Thomas, K., T. Hansen, D. Brophy, N. O. Maoileidigh, and P. G. Fjellidal. 2019. Experimental investigation of the effects of temperature and feeding regime on scale growth in Atlantic salmon *Salmo salar* post-smolts. *Journal of*

1617 Thompson, A. R., C. J. Harvey, W. J. Sydeman, C. Barcelo, S. J. Bograd, R. D. Brodeur, J. Fiechter, J. C. Field, N. Garfield, T. P. Good, E. L. Hazen, M. E. Hunsicker, K. Jacobson, M. G. Jacox, A. Leising, J. Lindsay, S. R. Melin, J. A. Santora, I. D. Schroeder, J. A. Thayer, B. K. Wells, and G. D. Williams. 2019. Indicators of pelagic forage community

1618 Thompson, C. R. S., D. M. Fields, R. M. Bjelland, V. B. S. Chan, C. M. F. Durif, A. Mount, J. A. Runge, S. D. Shema, A. B. Skiftesvik, and H. I. Browman. 2019. The planktonic stages of the salmon louse (*Lepeophtheirus salmonis*) are

1619 Thompson, J. N., and D. A. Beauchamp. 2014. Size-selective mortality of steelhead during freshwater and marine life stages related to freshwater growth in the Skagit River, Washington. *Transactions of the American Fisheries*

1620 Thompson, J. N., and D. A. Beauchamp. 2016. Growth of juvenile steelhead *Oncorhynchus mykiss* under size-selective pressure limited by seasonal bioenergetic and environmental constraints. *Journal of Fish Biology* 89:1720-

1621 Thompson, N. F., E. C. Anderson, A. J. Clemente, M. A. Campbell, D. E. Pearse, J. W. Hearsey, A. P. Kinziger, and J. C. Garza. 2020. A complex phenotype in salmon controlled by a simple change in migratory timing. *Science*

1622 Thompson, N. F., M. R. Christie, M. L. Marine, L. D. Curtis, and M. S. Blouin. 2016. Spawn date explains variation in growth rate among families of hatchery reared Hood River steelhead (*Oncorhynchus mykiss*). *Environmental*

1623 Thompson, S. A., W. J. Sydeman, J. A. Santora, B. A. Black, R. M. Suryan, J. Calambokidis, W. T. Peterson, and S. J. Bograd. 2012. Linking predators to seasonality of upwelling: Using food web indicators and path analysis to infer

1624 Thomson, R. E., and R. A. S. Hourston. 2011. A matter of timing: The role of ocean conditions in the initiation of spawning migration by late-run Fraser River sockeye salmon (*Oncorhynchus nerka*). *Fisheries Oceanography* 20:47-

1625 Thorn, M. W., and Y. E. Morbey. 2018. Egg size and the adaptive capacity of early life history traits in Chinook salmon (*Oncorhynchus tshawytscha*). *Evolutionary Applications* 11:205-219.

1626 Thorn, M. W., M. F. Dick, L. Oviedo, C. G. Guglielmo, and Y. E. Morbey. 2019. Transgenerational effects of egg nutrients on the early development of Chinook salmon (*Oncorhynchus tshawytscha*) across a thermal gradient.

1627 Thorne, J. H., R. M. Boynton, L. E. Flint, and A. L. Flint. 2015. The magnitude and spatial patterns of historical and future hydrologic change in California's watersheds. *Ecosphere* 6:24.

1628 Thorpe, A. S., and A. G. Stanley. 2011. Determining appropriate goals for restoration of imperilled communities and species. *Journal of Applied Ecology* 48:275-279.

1629 Thorson, J. T. 2020. Predicting recruitment density dependence and intrinsic growth rate for all fishes worldwide using a data-integrated life-history model. *Fish and Fisheries* 21:237-251.

1630 Thorson, J. T., M. D. Scheuerell, E. R. Buhle, and T. Copeland. 2014. Spatial variation buffers temporal fluctuations in early juvenile survival for an endangered Pacific salmon. *Journal of Animal Ecology* 83:157-167.

1631 Thorstad, E. B., I. Uglem, B. Finstad, F. Kroglund, I. E. Einarsdottir, T. Kristensen, O. Diserud, P. Arechavala-Lopez, I. Mayer, A. Moore, R. Nilsen, B. T. Bjornsson, and F. Okland. 2013. Reduced marine survival of hatchery-reared Atlantic salmon post-smolts exposed to aluminium and moderate acidification in freshwater. *Estuarine Coastal*

1632 Thraya, M., M. Hammoud, D. Heath, and P. Karpowicz. 2019. Testing the expression of circadian clock genes in the tissues of Chinook salmon, *Oncorhynchus tshawytscha*. *Chronobiology International* 36:1088-1102.

1633 Thurow, R. F., T. Copeland, and B. N. Oldemeyer. 2020. Wild salmon and the shifting baseline syndrome: application of archival and contemporary redd counts to estimate historical Chinook salmon (*Oncorhynchus tshawytscha*) production potential in the central Idaho wilderness. *Canadian Journal of Fisheries and Aquatic*

1634 Tian, Z., H. Zhao, K. T. Peter, M. Gonzalez, J. Wetzel, C. Wu, X. Hu, J. Prat, E. Mudrock, R. Hettinger, A. E. Cortina, R. G. Biswas, F. V. C. Kock, R. Soong, A. Jenne, B. Du, F. Hou, H. He, R. Lundeen, A. Gilbreath, R. Sutton, N. L. Scholz, J. W. Davis, M. C. Dodd, A. Simpson, J. K. McIntyre, and E. P. Kolodziej. 2020. A ubiquitous tire rubber-derived

1635 Tiffan, K. F., T. J. Kock, W. P. Connor, F. Mullins, and R. K. Steinhorst. 2012. Downstream movement of fall Chinook salmon juveniles in the Lower Snake River reservoirs during winter and early spring. *Transactions of the American*

- 1636 Tiffan, K. F., T. J. Kock, W. P. Connor, M. C. Richmond, and W. A. Perkins. 2018. Migratory behavior and physiological development as potential determinants of life history diversity in fall Chinook salmon in the
- 1637 Tiffan, K., J. M. Plumb, R. W. Perry, J. Erhardt, R. J. Hemingway, B. Bickford, T. N. Rhodes, W. P. Connor, and F. L. Mullins. 2020. Research, monitoring, and evaluation of emerging issues and measures to recover the Snake River
- 1638 Tillotson, M. D., and T. P. Quinn. 2017. Climate and conspecific density trigger pre-spawning mortality in sockeye salmon (*Oncorhynchus nerka*). *Fisheries Research* 188:138-148.
- 1639 Tillotson, M. D., and T. P. Quinn. 2018. Selection on the timing of migration and breeding: A neglected aspect of fishing-induced evolution and trait change. *Fish and Fisheries* 19:170-181.
- 1640 Tillotson, M. D., H. K. Barnett, M. Bhuthimethee, M. E. Koehler, and T. P. Quinn. 2019. Artificial selection on reproductive timing in hatchery salmon drives a phenological shift and potential maladaptation to climate change.
- 1641 Tillotson, M. D., M. C. Arostegui, C. S. Austin, A. E. Lincoln, W. Matsubu, K. N. McElroy, and T. P. Quinn. 2021. Challenges in the Identification and Interpretation of Phenological Shifts: Anthropogenic Influences on Adult Migration Timing in Salmonids. *Reviews in Fisheries Science & Aquaculture*:1-33.
- 1642 Tillotson, M. D., T. F. Sheehan, B. Ellingson, R. E. Haas-Castro, M. Olmos, and K. E. Mills. 2021. Non-stationary effects of growth on the survival of North American Atlantic salmon (*Salmo salar*). *Ices Journal of Marine Science*
- 1643 Timm, A., V. Ouellet, and M. Daniels. 2020. Swimming through the urban heat island: Can thermal mitigation practices reduce the stress? *River Research and Applications* 36:1973-1984.
- 1644 Timm, A., V. Ouellet, and M. Daniels. 2021. Riparian Land Cover, Water Temperature Variability, and Thermal Stress for Aquatic Species in Urban Streams. *Water* 13.
- 1645 Timpane-Padgham, B. L., T. Beechie, and T. Klinger. 2017. A systematic review of ecological attributes that confer resilience to climate change in environmental restoration. *Plos One* 12.
- 1646 Todd, C. D., K. D. Friedland, J. C. MacLean, B. D. Whyte, I. C. Russell, M. E. Lonergan, and M. B. Morrissey. 2012. Phenological and phenotypic changes in Atlantic salmon populations in response to a changing climate. *Ices*
- 1647 Todd, C. D., N. N. Hanson, L. Boehme, C. W. Revie, and A. R. Marques. 2021. Variation in the post-smolt growth pattern of wild one sea-winter salmon (*Salmo salar* L.), and its linkage to surface warming in the
- 1648 Tohver, I. M., A. F. Hamlet, and S.-Y. Lee. 2014. Impacts of 21st century climate change on hydrologic extremes in the Pacific northwest region of North American. *Journal of the American Water Resources Association* 50:1461-
- 1649 Tomaro, L. M., D. J. Teel, W. T. Peterson, and J. A. Miller. 2012. When is bigger better? Early marine residence of middle and upper Columbia River spring Chinook salmon. *Marine Ecology-Progress Series* 452:237-252.
- 1650 Tommasi, D., Y. deReynier, H. Townsend, C. J. Harvey, W. H. Satterthwaite, K. N. Marshall, I. C. Kaplan, S. Brodie, J. C. Field, E. L. Hazen, S. Koenigstein, J. Lindsay, K. Moore, B. Muhling, L. Pfeiffer, J. A. Smith, J. Sweeney, B. Wells, and M. G. Jacox. 2021. A Case Study in Connecting Fisheries Management Challenges With Models and Analysis to Support Ecosystem-Based Management in the California Current Ecosystem. *Frontiers in Marine Science* 8.
- 1651 Tonteri, A., A. Vasemagi, J. Lumme, and C. R. Primmer. 2010. Beyond MHC: Signals of elevated selection pressure on Atlantic salmon (*Salmo salar*) immune-relevant loci. *Molecular Ecology* 19:1273-1282.
- 1652 Torregrosa, A., L. E. Flint, and A. L. Flint. 2020. Hydrologic Resilience from Summertime Fog and Recharge: A Case Study for Coho Salmon Recovery Planning. *Journal of the American Water Resources Association* 56:134-160.
- 1653 Trammell, J., M. Krupa, P. Williams, and A. Kliskey. 2021. Using Comprehensive Scenarios to Identify Social-Ecological Threats to Salmon in the Kenai River Watershed, Alaska. *Sustainability* 13.
- 1654 Tray, E., A. Leadbetter, W. Meaney, A. Conway, C. Kelly, N. O. Maoileidigh, E. de Eyto, S. Moran, and D. Brophy. 2020. An open-source database model and collections management system for fish scale and otolith archives.
- 1655 Treanor, H. B., A. M. Ray, J. J. Amberg, M. P. Gaikowski, J. E. Ilgen, R. E. Gresswell, L. Gains-Germain, and M. A. H. Webb. 2020. Carbon Dioxide-Induced Mortality of Four Species of North American Fishes. *Journal of Fish and*
- 1656 Trehin, C., E. Rivot, L. Lamireau, L. Meslier, A. L. Besnard, S. D. Gregory, and M. Nevoux. 2021. Growth during the first summer at sea modulates sex-specific maturation schedule in Atlantic salmon. *Canadian Journal of Fisheries*
- 1657 Trueman, C. N., K. M. MacKenzie, and M. R. Palmer. 2012. Stable isotopes reveal linkages between ocean climate, plankton community dynamics, and survival of two populations of Atlantic salmon (*Salmo salar*). *Ices Journal of*
- 1658 Tucker, S., M. E. Thiess, J. F. T. Morris, D. Mackas, W. T. Peterson, J. R. Candy, T. D. Beacham, E. M. Iwamoto, D. J. Teel, M. Peterson, and M. Trudel. 2015. Coastal Distribution and Consequent Factors Influencing Production of Endangered Snake River Sockeye Salmon. *Transactions of the American Fisheries Society* 144:107-123.
- 1659 Tudorache, C., R. A. O'Keefe, and T. J. Benfey. 2010. The effect of temperature and ammonia exposure on swimming performance of brook charr (*Salvelinus fontinalis*). *Comparative Biochemistry and Physiology a-*

- 1660 Tuncelli, G., and D. Memis. 2021. Effects of constant and changing water temperature on sperm quality of the endangered coruh trout, *Salmo coruhensis*. *Journal of Applied Aquaculture* 33:209-220.
- 1661 Tuncelli, G., and J. Pirhonen. 2021. Effects of weekend starvation and the duration of daily feeding on production parameters of rainbow trout *Oncorhynchus mykiss*. *Aquaculture* 543.
- 1662 Tuor, K. M. F., and J. M. Shrimpton. 2019. Differences in water temperatures experienced by embryo and larval Coho Salmon (*Oncorhynchus kisutch*) across their geographic range in British Columbia. *Environmental Biology of*
- 1663 Tuor, K. M. F., D. D. Heath, and J. M. Shrimpton. 2020. Spatial and environmental effects on Coho Salmon life history trait variation. *Ecology and Evolution* 10:13198-13210.
- 1664 Turecek, A., Q. Payton, J. D. Alexander, D. Goodman, A. F. Evans, and N. A. Som. 2021. Reducing River Flows to Control a Parasitic Salmonid Disease in the Klamath River: Simulations Question the Efficacy of Desiccation as a Management Tool. *North American Journal of Fisheries Management* 41:1215-1224.
- 1665 Turrero, P., J. L. Horreo, and E. Garcia-Vazquez. 2012. Same old Salmo? Changes in life history and demographic trends of North Iberian salmonids since the Upper Palaeolithic as revealed by archaeological remains and beast
- 1666 Twardek, W. M., A. Ekstrom, E. J. Eliason, R. J. Lennox, E. Tuononen, A. E. I. Abrams, A. L. Jeanson, and S. J. Cooke. 2021. Field assessments of heart rate dynamics during spawning migration of wild and hatchery-reared Chinook salmon. *Philosophical Transactions of the Royal Society B-Biological Sciences* 376.
- 1667 Twardek, W. M., J. M. Chapman, K. M. Miller, M. C. Beere, S. Li, K. H. Kaukinen, A. J. Danylchuk, and S. J. Cooke. 2019. Evidence of a hydraulically challenging reach serving as a barrier for the upstream migration of infection-
- 1668 Twardek, W. M., T. O. Gagne, L. K. Elmer, S. J. Cooke, M. C. Beere, and A. J. Danylchuk. 2018. Consequences of catch-and-release angling on the physiology, behaviour and survival of wild steelhead *Oncorhynchus mykiss* in the
- 1669 U.S. Army Corps of Engineers (ACOE), Northwestern Division Bureau of Reclamation, and P. N. R. B. P. Administration. 2020. Columbia River System Operations Draft Environmental Impact Statement, February 2020.
- 1670 U.S. Army Corps of Engineers. 2013. Location and use of adult salmon thermal refugia in the lower Columbia and lower Snake rivers.
- 1671 Ulaski, M. E., H. Finkle, A. H. Beaudreau, and P. A. H. Westley. 2021. Climate and conspecific density inform phenotypic forecasting of juvenile Pacific salmon body size. *Freshwater Biology*.
- 1672 Underwood, Z. E., C. A. Myrick, and K. B. Rogers. 2012. Effect of acclimation temperature on the upper thermal tolerance of Colorado River cutthroat trout *Oncorhynchus clarkii pleuriticus*: Thermal limits of a North American
- 1673 Urbach, D., M. Kang, S. Kang, K. B. Seong, S. Kim, U. Dieckmann, and M. Heino. 2012. Growth and maturation of Korean chum salmon under changing environmental conditions. *Fisheries Research* 134:104-112.
- 1674 USFWS. 2011. National Fish, Wildlife and Plants Climate Adaptation Strategy, Agency Review Draft. Available at: [www.wildlifeadaptationstrategy.gov](http://www.wildlifeadaptationstrategy.gov).
- 1675 USGCRP. 2017. Climate Science Special Report: Fourth National Climate Assessment, Volume I. U.S. Global Change Research Program, Washington, D.C., U.S.A.
- 1676 USGCRP. 2018. Impacts, Risks, and Adaptation in the United States: Fourth National Climate Assessment, Volume II. U.S. Global Change Research Program, Washington, D.C., U.S.A.
- 1677 Utne, P., R. Al-Chokhachy, B. B. Shepard, A. V. Zale, and J. L. Kershner. 2019. Effects of Climate-Related Stream Factors on Patterns of Individual Summer Growth of Cutthroat Trout. *Transactions of the American Fisheries*
- 1678 Utne, K. R., B. D. Pauli, M. Haugland, J. A. Jacobsen, N. Maoileidigh, W. Melle, C. T. Broms, L. Nottestad, M. Holm, K. Thomas, and V. Wennevik. 2021. Poor feeding opportunities and reduced condition factor for salmon post-smolts in the Northeast Atlantic Ocean. *Ices Journal of Marine Science* 78:2844-2857.
- 1679 Utne, K. R., K. Thomas, J. A. Jacobsen, J. Fall, N. O. Maoileidigh, C. T. Broms, and W. Melle. 2021. Feeding interactions between Atlantic salmon (*Salmo salar*) postsmolts and other planktivorous fish in the Northeast
- 1680 Vainikka, A., I. Kallio-Nyberg, M. Heino, and M. L. Koljonen. 2010. Divergent trends in life-history traits between Atlantic salmon *Salmo salar* of wild and hatchery origin in the Baltic Sea. *Journal of Fish Biology* 76:622-640.
- 1681 Valerie, O., and M. D. Daniels. 2021. Brook Trout (*Salvelinus fontinalis*) and Brown Trout (*Salmo trutta*) summer thermal habitat use in streams with sympatric populations. *Journal of Thermal Biology* 98.
- 1682 Valiente, A. G., E. Beall, and E. Garcia-Vazquez. 2010. Population genetics of south European Atlantic salmon under global change. *Global Change Biology* 16:36-47.
- 1683 van der Bolt, B., E. H. van Nes, S. Bathiany, M. E. Vollebregt, and M. Scheffer. 2018. Climate reddening increases the chance of critical transitions. *Nature Climate Change* 8:478-484.

- 1684 Van Doorslaer, W., J. Vanoverbeke, C. Duivier, S. Rousseaux, M. Jansen, B. Jansen, H. Feuchtmayr, D. Atkinson, B. Moss, R. Stoks, and L. De Meester. 2009. Local adaptation to higher temperatures reduces immigration success of genotypes from a warmer region in the water flea *Daphnia*. *Global Change Biology* 15:3046-3055.
- 1685 Van Doorslaer, W., R. Stoks, C. Duivier, A. Bednarska, and L. De Meester. 2009. Population dynamics determine genetic adaptation to temperature in *Daphnia*. *Evolution* 63:1867-1878.
- 1686 Van Doorslaer, W., R. Stoks, I. Swillen, H. Feuchtmayr, D. Atkinson, B. Moss, and L. De Meester. 2010. Experimental thermal microevolution in community-embedded *Daphnia* populations. *Climate Research* 43:81-89.
- 1687 Van Dyke, E. S., D. L. Scarnecchia, B. C. Jonasson, and R. W. Carmichael. 2010. Ecology of winter concealment behavior of juvenile spring Chinook salmon in the Grande Ronde River Basin, Oregon. *Northwest Science* 84:9-19.
- 1688 van Kirk, R. W., and S. W. Naman. 2008. Relative effects of climate and water use on base-flow trends in the lower Klamath Basin. *Journal of the American Water Resources Association* 44:1035-1054.
- 1689 Van Leeuwen, T. E., B. Dempson, D. Cote, N. I. Kelly, and A. E. Bates. 2021. Catchability of Atlantic salmon at high water temperatures: Implications for river closure temperature thresholds to catch and release angling. *Fisheries*
- 1690 Van Leeuwen, T. E., J. B. Dempson, C. M. Burke, N. I. Kelly, M. J. Robertson, R. J. Lennox, T. B. Havn, M. Svenning, R. Hinks, M. M. Guzzo, E. B. Thorstad, C. F. Purchase, and A. E. Bates. 2020. Mortality of Atlantic salmon after catch and release angling: assessment of a recreational Atlantic salmon fishery in a changing climate. *Canadian*
- 1691 Vander Vorste, R., M. Obedzinski, S. N. Pierce, S. M. Carlson, and T. E. Grantham. 2020. Refuges and ecological traps: Extreme drought threatens persistence of an endangered fish in intermittent streams. *Global Change*
- 1692 Vano, J. A., B. Nijssen, and D. P. Lettenmaier. 2015. Seasonal hydrologic responses to climate change in the Pacific Northwest. *Water Resources Research* 51:1959-1976.
- 1693 Vargas-Chacoff, L., A. M. Regish, A. Weinstock, and S. D. McCormick. 2018. Effects of elevated temperature on osmoregulation and stress responses in Atlantic salmon *Salmo salar* smolts in fresh water and seawater. *Journal of*
- 1694 Vega, S. L., T. M. Sutton, and J. M. Murphy. 2017. Marine-entry timing and growth rates of juvenile Chum Salmon in Alaskan waters of the Chukchi and northern Bering seas. *Deep Sea Research Part II: Topical Studies in*
- 1695 Vehanen, T., P. Louhi, A. Huusko, A. Maki-Petays, O. van der Meer, P. Orell, R. Huusko, M. Jaukkuri, and T. Sutela. 2020. Behaviour of upstream migrating adult salmon (*Salmo salar* L.) in the tailrace channels of hydropeaking
- 1696 Veilleux, H. D., J. M. Donelson, and P. L. Munday. 2018. Reproductive gene expression in a coral reef fish exposed to increasing temperature across generations. *Conservation Physiology* 6:12.
- 1697 Venney, C. J., O. P. Love, E. J. Drown, and D. D. Heath. 2020. DNA Methylation Profiles Suggest Intergenerational Transfer of Maternal Effects. *Molecular Biology and Evolution* 37:540-548.
- 1698 Ventres-Pake, R., M. Nahorniak, N. Kramer, J. O'Neal, and T. Abbe. 2020. Integrating Large Wood Jams into Hydraulic Models: Evaluating a Porous Plate Modeling Method. *Journal of the American Water Resources*
- 1699 Verhille, C. E., K. K. English, D. E. Cocherell, A. P. Farrell, and N. A. Fangue. 2016. High thermal tolerance of a rainbow trout population near its southern range limit suggests local thermal adjustment. *Conserv Physiol*
- 1700 Vigliano, P. H., M. M. Rechencq, M. V. Fernandez, G. E. Lippolt, and P. J. Macchi. 2018. Fish thermal habitat current use and simulation of thermal habitat availability in lakes of the Argentine Patagonian Andes under climate change scenarios RCP 4.5 and RCP. *Science of the Total Environment* 636:688-698.
- 1701 Vikeså, V., L. Nankervis, and E. M. Hevrøy. 2017. Appetite, metabolism and growth regulation in Atlantic salmon (*Salmo salar* L.) exposed to hypoxia at elevated seawater temperature. *Aquaculture Research* 48:4086-4101.
- 1702 Vincent, B., M. Dionne, M. P. Kent, S. Lien, and L. Bernatchez. 2013. Landscape genomics in Atlantic Salmon (*Salmo salar*): Searching for gene-environment interactions driving local adaptation. *Evolution* 67:3469-3487.
- 1703 Visintin, C., N. J. Briscoe, S. N. C. Woolley, P. E. Lentini, R. Tingley, B. A. Wintle, N. Golding, and L. Graham. 2020. STEPS: Software for spatially and temporally explicit population simulations. *Methods in Ecology and Evolution*
- 1704 Vogel, D. 2017. Evaluation of Annual Estimates of Winter-Run Chinook Salmon Early Life Stage Survival/Mortality with Particular Focus on 2014 and 2015 . Preliminary Report.
- 1705 Volkov, A. F. 2012. Is the mass emergence of *Themisto libellula* in the northern Bering Sea an invasion or a bloom? *Russian Journal of Marine Biology* 38:465-473.
- 1706 Vollset, K. W. 2019. Parasite induced mortality is context dependent in Atlantic salmon: insights from an individual-based model. *Scientific Reports* 9:15.
- 1707 Vollset, K. W., R. J. Lennox, J. G. Davidsen, S. H. Eldoy, T. E. Isaksen, A. Madhun, S. Karlsson, and K. M. Miller. 2021. Wild salmonids are running the gauntlet of pathogens and climate as fish farms expand northwards. *Ices Journal*
- 1708 von Biela, V. R., B. A. Black, D. B. Young, P. van der Sleen, K. K. Bartz, and C. E. Zimmerman. 2021. Lake trout growth is sensitive to spring temperature in southwest Alaska lakes. *Ecology of Freshwater Fish* 30:88-99.

- 1709 von Biela, V. R., C. E. Zimmerman, G. H. Kruse, F. J. Mueter, B. A. Black, D. C. Douglas, and J. L. Bodkin. 2016. Influence of basin- and local-scale environmental conditions on nearshore production in the northeast Pacific
- 1710 von Biela, V. R., L. Bowen, S. D. McCormick, M. P. Carey, D. S. Donnelly, S. Waters, A. M. Regish, S. M. Laske, R. J. Brown, S. Larson, S. Zuray, and C. E. Zimmerman. 2020. Evidence of prevalent heat stress in Yukon River Chinook salmon. *Canadian Journal of Fisheries and Aquatic Sciences* 77:1878-1892.
- 1711 von Biela, V. R., M. L. Arimitsu, J. F. Piatt, B. Heflin, S. K. Schoen, J. L. Trowbridge, and C. M. Clawson. 2019. Extreme reduction in nutritional value of a key forage fish during the Pacific marine heatwave of 2014-2016.
- 1712 Vynne, C., E. Dovichin, N. Fresco, N. Dawson, A. Joshi, B. E. Law, K. Lertzman, S. Rupp, F. Schmiegelow, and E. J. Trammell. 2021. The Importance of Alaska for Climate Stabilization, Resilience, and Biodiversity Conservation.
- 1713 Wade, A. A., B. K. Hand, R. P. Kovach, G. Luikart, D. C. Whited, and C. C. Muhlfeld. 2017. Accounting for adaptive capacity and uncertainty in assessments of species' climate-change vulnerability. *Conservation Biology* 31:136-
- 1714 Wade, A. A., T. J. Beechie, E. Fleishman, N. J. Mantua, H. Wu, J. S. Kimball, D. M. Stoms, and J. A. Stanford. 2013. Steelhead vulnerability to climate change in the Pacific Northwest. *Journal of Applied Ecology* 50:1093-1104.
- 1715 Wagener, F., and A. de Zeeuw. 2021. Stable partial cooperation in managing systems with tipping points. *Journal of Environmental Economics and Management* 109.
- 1716 Waibel, M. S., M. W. Gannett, H. Chang, and C. L. Hulbe. 2013. Spatial variability of the response to climate change in regional groundwater systems - Examples from simulations in the Deschutes Basin, Oregon. *Journal of*
- 1717 Wainwright, T. C. 2021. Ephemeral relationships in salmon forecasting: A cautionary tale. *Progress in*
- 1718 Wainwright, T. C., and L. A. Weitkamp. 2013. Effects of climate change on Oregon coast Coho salmon: Habitat and life-cycle interactions. *Northwest Science* 87:219-242.
- 1719 Waite, I. R., Y. D. Pan, and P. M. Edwards. 2020. Assessment of multi-stressors on compositional turnover of diatom, invertebrate and fish assemblages along an urban gradient in Pacific Northwest streams (USA). *Ecological*
- 1720 Waldner, K., T. Bechter, S. Auer, F. Borgwardt, M. El-Matbouli, and G. Unfer. 2019. A brown trout (*Salmo trutta*) population faces devastating consequences due to proliferative kidney disease and temperature increase: A case
- 1721 Walker, C. M., D. F. Whigham, I. S. Bentz, J. M. Argueta, R. S. King, M. C. Rains, C. A. Simenstad, C. Guo, S. J. Baird, and C. J. Field. 2021. Linking landscape attributes to salmon and decision-making in the southern Kenai Lowlands,
- 1722 Walker, R. H., G. D. Smith, S. B. Hudson, S. S. French, and A. W. Walters. 2020. Warmer temperatures interact with salinity to weaken physiological facilitation to stress in freshwater fishes. *Conservation Physiology* 8.
- 1723 Walsh, J. C., J. E. Pendray, S. C. Godwin, K. A. Artelle, H. K. Kindsvater, R. D. Field, J. N. Harding, N. R. Swain, and J. D. Reynolds. 2020. Relationships between Pacific salmon and aquatic and terrestrial ecosystems: implications for
- 1724 Walsworth, T. E., and D. E. Schindler. 2015. Coho salmon escapement and trends in migration timing to a data-poor river: estimates from a Bayesian hierarchical model. *Canadian Journal of Fisheries and Aquatic Sciences*
- 1725 Walsworth, T. E., and P. Budy. 2021. An empirically based simulation model to inform flow management for endangered species conservation. *Canadian Journal of Fisheries and Aquatic Sciences* 78:1770-1781.
- 1726 Walsworth, T. E., J. R. Baldock, C. E. Zimmerman, and D. E. Schindler. 2020. Interaction between watershed features and climate forcing affects habitat profitability for juvenile salmon. *Ecosphere* 11.
- 1727 Walters, A. W., K. K. Bartz, and M. M. McClure. 2013. Interactive effects of water diversion and climate change for juvenile Chinook salmon in the Lemhi River Basin (U.S.A.). *Conservation Biology* 27:1179-1189.
- 1728 Walters, C., K. English, J. Korman, and R. Hilborn. 2019. The managed decline of British Columbia's commercial salmon fishery. *Marine Policy* 101:25-32.
- 1729 Wang, M., and J. E. Overland. 2015. Projected future duration of the sea-ice-free season in the Alaskan Arctic.
- 1730 Wang, M., J. E. Overland, and P. Staben. 2012. Future climate of the Bering and Chukchi Seas projected by global climate models. *Deep Sea Research Part II: Topical Studies in Oceanography* 65-70:46-57.
- 1731 Wang, T. R., S. J. Kelson, G. Greer, S. E. Thompson, and S. M. Carlson. 2020. Tributary confluences are dynamic thermal refuges for a juvenile salmonid in a warming river network. *River Research and Applications* 36:1076-
- 1732 Waples, R. S., A. Elz, B. D. Arnsberg, J. R. Faulkner, J. J. Hard, E. Timmins-Schiffman, and L. K. Park. 2017. Human-mediated evolution in a threatened species? Juvenile life-history changes in Snake River salmon. *Evol Appl* 10:667-
- 1733 Waples, R. S., and A. Audzijonyte. 2016. Fishery-induced evolution provides insights into adaptive responses of marine species to climate change. *Frontiers in Ecology and the Environment* 14:217-224.
- 1734 Ward, A. S., S. M. Wondzell, N. M. Schmadel, and S. P. Herzog. 2020. Climate Change Causes River Network Contraction and Disconnection in the HJ Andrews Experimental Forest, Oregon, USA. *Frontiers in Water* 2.
- 1735 Ward, E. J., J. H. Anderson, T. J. Beechie, G. R. Pess, and M. J. Ford. 2015. Increasing hydrologic variability threatens depleted anadromous fish populations. *Global Change Biology* 21:2500-2509.

- 1736 Ward, E. J., M. Adkison, J. Couture, S. C. Dressel, M. A. Litzow, S. Moffitt, T. Hoem Neher, J. Trochta, and R. Brenner. 2017. Evaluating signals of oil spill impacts, climate, and species interactions in Pacific herring and Pacific salmon populations in Prince William Sound and Copper River, Alaska. *Plos One* 12:e0172898.
- 1737 Ward, H. G. M., J. R. Post, N. P. Lester, P. J. Askey, and T. Godin. 2017. Empirical evidence of plasticity in life-history characteristics across climatic and fish density gradients. *Canadian Journal of Fisheries and Aquatic*
- 1738 Warlick, A. J., G. M. Ylitalo, S. M. O'Neill, M. B. Hanson, C. Emmons, and E. J. Ward. 2020. Using Bayesian stable isotope mixing models and generalized additive models to resolve diet changes for fish-eating killer whales
- 1739 Warnock, W. G., and J. B. Rasmussen. 2013. Abiotic and biotic factors associated with brook trout invasiveness into bull trout streams of the Canadian Rockies. *Canadian Journal of Fisheries and Aquatic Sciences* 70:905-914.
- 1740 Warren, D. R., J. M. Robinson, D. C. Josephson, D. R. Sheldon, and C. E. Kraft. 2012. Elevated summer temperatures delay spawning and reduce redd construction for resident brook trout (*Salvelinus fontinalis*). *Global*
- 1741 Warriner, T. R., C. A. D. Semeniuk, T. E. Pitcher, and O. P. Love. 2020. Exposure to exogenous egg cortisol does not rescue juvenile Chinook salmon body size, condition, or survival from the effects of elevated water temperatures.
- 1742 Warriner, T. R., C. A. D. Semeniuk, T. E. Pitcher, D. D. Heath, and O. P. Love. 2020. Mimicking Transgenerational Signals of Future Stress: Thermal Tolerance of Juvenile Chinook Salmon Is More Sensitive to Elevated Rearing Temperature Than Exogenously Increased Egg Cortisol. *Frontiers in Ecology and Evolution* 8.
- 1743 Warzybok, P., J. A. Santora, D. G. Ainley, R. W. Bradley, J. C. Field, P. J. Capitolo, R. D. Carle, M. Elliott, J. N. Beck, G. J. McChesney, M. M. Hester, and J. Jahncke. 2018. Prey switching and consumption by seabirds in the central California Current upwelling ecosystem: Implications for forage fish management. *Journal of Marine Systems*
- 1744 Wassmann, P., C. M. Duarte, S. Agustí, and M. K. Sejr. 2010. Footprints of climate change in the Arctic Marine Ecosystem. *Global Change Biology* 17:1235–1249.
- 1745 Watanabe, K. 2017. Multi-timescale interactions between pink and chum salmon catch per unit effort in the Bering Sea. *Fisheries Oceanography* 26:498-506.
- 1746 Waterhouse, L., J. White, K. See, A. Murdoch, and B. X. Semmens. 2020. A Bayesian nested patch occupancy model to estimate steelhead movement and abundance. *Ecological Applications* e02202.
- 1747 Waters, C. D., J. J. Hard, D. E. Fast, C. M. Knudsen, W. J. Bosch, and K. A. Naish. 2020. Genomic and phenotypic effects of inbreeding across two different hatchery management regimes in Chinook salmon. *Molecular Ecology*
- 1748 Watson, K. B., S. J. Lehnert, P. Bentzen, T. Kess, A. Einfeldt, S. Duffy, B. Perriman, S. Lien, M. Kent, and I. R. Bradbury. 2021. Environmentally associated chromosomal structural variation influences fine-scale population
- 1749 Watz, J., D. Aldven, P. Andreasson, K. Aziz, M. Blixt, O. Calles, K. L. Bjornas, I. Olsson, M. Osterling, S. Stalhammar, J. Tielman, and J. J. Piccolo. 2021. Atlantic salmon in regulated rivers: Understanding river management through
- 1750 Watz, J., Y. Otsuki, K. Nagatsuka, K. Hasegawa, and I. Koizumi. 2019. Temperature-dependent competition between juvenile salmonids in small streams. *Freshwater Biology* 64:1534-1541.
- 1751 Weber, C., C. Nilsson, L. Lind, K. T. Alfredsen, and L. E. Polvi. 2013. Winter disturbances and riverine fish in temperate and cold regions. *Bioscience* 63:199-210.
- 1752 Wedekind, C., and C. Kung. 2010. Shift of spawning season and effects of climate warming on developmental stages of a grayling (*Salmonidae*). *Conservation Biology* 24:1418-1423.
- 1753 Wegleitner, E., J. Raabe, D. Dembkowski, N. Legler, and D. Isermann. 2021. Wild juvenile salmonid abundance in Wisconsin tributaries indicates limited contributions to Lake Michigan fisheries. *Journal of Great Lakes Research*
- 1754 Weil, J., W. D. P. Duguid, and F. Juanes. 2019. A hyperiid amphipod acts as a trophic link between a scyphozoan medusa and juvenile Chinook Salmon. *Estuarine Coastal and Shelf Science* 223:18-24.
- 1755 Weinheimer, J., J. H. Anderson, M. Downen, M. Zimmerman, and T. Johnson. 2017. Monitoring climate impacts: Survival and migration timing of summer chum salmon in Salmon Creek, Washington. *Transactions of the*
- 1756 Weise, E. M., N. M. Sard, A. Nehfer, and K. T. Scribner. 2020. Adaptive genetic management: assessing the benefits of translocations. *Conservation Genetics* 21:277-287.
- 1757 Weitkamp, L. A. 2010. Marine distributions of Chinook salmon from the West Coast of North America determined by coded wire tag recoveries. *Transactions of the American Fisheries Society* 139:147-170.
- 1758 Weitkamp, L. A., D. J. Teel, M. Liermann, S. A. Hinton, D. M. Van Doornik, and P. J. Bentley. 2015. Stock-Specific Size and Timing at Ocean Entry of Columbia River Juvenile Chinook Salmon and Steelhead: Implications for Early
- 1759 Welch, D. W., A. D. Porter, and E. L. Rechisky. 2020. A synthesis of the coast-wide decline in survival of West Coast Chinook Salmon (*Oncorhynchus tshawytscha*, *Salmonidae*). <https://doi.org/10.1111/faf.12514>. *Fish and Fisheries*
- 1760 Wellband, K. W., and D. D. Heath. 2013. Environmental associations with gene transcription in Babine Lake rainbow trout: Evidence for local adaptation. *Ecology and Evolution* 3:1194-1208.

- 1761 Wellband, K. W., and D. D. Heath. 2013. The relative contribution of drift and selection to transcriptional divergence among Babine Lake tributary populations of juvenile rainbow trout. *Journal of Evolutionary Biology*
- 1762 Wells, B. K., D. D. Huff, B. J. Burke, R. D. Brodeur, J. A. Santora, J. C. Field, K. Richerson, N. J. Mantua, K. L. Fresh, M. M. McClure, W. H. Satterthwaite, F. Darby, S. J. Kim, R. W. Zabel, and S. T. Lindley. 2020. Implementing Ecosystem-Based Management Principles in the Design of a Salmon Ocean Ecology Program. *Frontiers in Marine*
- 1763 Wells, B. K., I. D. Schroeder, J. A. Santora, E. L. Hazen, S. J. Bograd, E. P. Bjorkstedt, V. J. Loeb, S. McClatchie, E. D. Weber, W. Watson, A. R. Thompson, W. T. Peterson, R. D. Brodeur, J. Harding, J. Field, K. Sakuma, S. Hayes, N. Mantua, W. J. Sydeman, M. Losekoot, S. A. Thompson, J. Largier, S. Y. Kim, F. P. Chavez, C. Barcelo, P. Warzybok, R. Bradley, J. Jahncke, R. Goericke, G. S. Campbell, J. A. Hildebrand, S. R. Melin, R. L. Delong, J. Gomez-Valdes, B. Lavaniegos, G. Gaxiola-Castro, R. T. Golightly, S. R. Schneider, N. Lo, R. M. Suryan, A. J. Gladics, C. A. Horton, J. Fisher, C. Morgan, J. Peterson, E. A. Daly, T. D. Auth, and J. Abell. 2013. State of the California Current 2012-13: No
- 1764 Wells, B. K., J. A. Santora, I. D. Schroeder, N. Mantua, W. J. Sydeman, D. D. Huff, and J. C. Field. 2016. Marine ecosystem perspectives on Chinook salmon recruitment: A synthesis of empirical and modeling studies from a
- 1765 Wells, B. K., J. A. Santora, M. J. Henderson, P. Warzybok, J. Jahncke, R. W. Bradley, D. D. Huff, I. D. Schroeder, P. Nelson, J. C. Field, and D. G. Ainley. 2017. Environmental conditions and prey-switching by a seabird predator
- 1766 Wenger, S. J., C. H. Luce, A. F. Hamlet, D. J. Isaak, and H. M. Neville. 2010. Macroscale hydrologic modeling of ecologically relevant flow metrics. *Water Resources Research* 46:W09513.
- 1767 Wenger, S. J., D. J. Isaak, C. H. Luce, H. M. Neville, K. D. Fausch, J. B. Dunham, D. C. Dauwalter, M. K. Young, M. M. Elsner, B. E. Rieman, A. F. Hamlet, and J. E. Williams. 2011. Flow regime, temperature, and biotic interactions drive differential declines of trout species under climate change. *Proceedings of the National Academy of Sciences of*
- 1768 Wenger, S. J., N. A. Som, D. C. Dauwalter, D. J. Isaak, H. M. Neville, C. H. Luce, J. B. Dunham, M. K. Young, K. D. Fausch, and B. E. Rieman. 2013. Probabilistic accounting of uncertainty in forecasts of species distributions under
- 1769 Westley, P. A. H. 2020. Documentation of natural mortality of summer chum salmon in the Koyukuk River, Alaska and its potential linkage to the heatwave of 2019. *Ecology and Evolution* 10:10296-10304.
- 1770 Westley, P. A. H., D. E. Schindler, T. P. Quinn, G. T. Ruggione, and R. Hilborn. 2010. Natural habitat change, commercial fishing, climate, and dispersal interact to restructure an Alaskan fish metacommunity. *Oecologia*
- 1771 Westley, P. A. H., J. C. Black, C. Carothers, and D. Ringer. 2021. State of Alaska's salmon and people: introduction to a special feature. *Ecology and Society* 26.
- 1772 White, J. W., L. W. Botsford, A. Hastings, and M. D. Holland. 2014. Stochastic models reveal conditions for cyclic dominance in sockeye salmon populations. *Ecological Monographs* 84:69-90.
- 1773 White, S. M., S. Brandy, C. Justice, K. A. Morinaga, L. Naylor, J. Ruzycski, E. R. Sedell, J. Steele, A. Towne, J. G. Webster, and I. Wilson. 2020. Progress Towards a Comprehensive Approach for Habitat Restoration in the
- 1774 Whitney, C. K., S. G. Hinch, and D. A. Patterson. 2013. Provenance matters: Thermal reaction norms for embryo survival among sockeye salmon *Oncorhynchus nerka* populations. *Journal of Fish Biology* 82:1159-1176.
- 1775 Whitney, C. K., S. G. Hinch, and D. A. Patterson. 2014. Population origin and water temperature affect development timing in embryonic sockeye salmon. *Transactions of the American Fisheries Society* 143:1316-1329.
- 1776 Whitney, D. W., K. A. Meyer, J. L. McCormick, and B. J. Bowersox. 2019. Effects of Fishery-Related Fight Time and Air Exposure on Prespawn Survival and Reproductive Success of Adult Hatchery Steelhead. *North American*
- 1777 Whitney, E. J., J. R. Bellmore, J. R. Benjamin, C. E. Jordan, J. B. Dunham, M. Newsom, and M. Nahorniak. 2020. Beyond sticks and stones: Integrating physical and ecological conditions into watershed restoration assessments
- 1778 Wiens, J. J. 2016. Climate-related local extinctions are already widespread among plant and animal species. *PLOS*
- 1779 Wilbur, N. M., A. M. O'Sullivan, K. T. B. MacQuarrie, T. Linnansaari, and R. A. Curry. 2020. Characterizing physical habitat preferences and thermal refuge occupancy of brook trout (*Salvelinus fontinalis*) and Atlantic salmon (*Salmo salar*) at high river temperatures. *River Research and Applications* 36:769-783.
- 1780 Wilby, R. L., H. Orr, G. Watts, R. W. Battarbee, P. M. Berry, R. Chadd, S. J. Dugdale, M. J. Dunbar, J. A. Elliott, C. Extence, D. M. Hannah, N. Holmes, A. C. Johnson, B. Knights, N. J. Milner, S. J. Ormerod, D. Solomon, R. Timlett, P. J. Whitehead, and P. J. Wood. 2010. Evidence needed to manage freshwater ecosystems in a changing climate:
- 1781 Wilkinson, R. J., R. Longland, H. Woolcott, and M. J. R. Porter. 2010. Effect of elevated winter-spring water temperature on sexual maturation in photoperiod manipulated stocks of rainbow trout (*Oncorhynchus mykiss*).
- 1782 Williams, A. P., B. I. Cook, and J. E. Smerdon. 2022. Rapid intensification of the emerging southwestern North American megadrought in 2020–2021. *Nature Climate Change*.



- 1783 Williams, C. R., A. H. Dittman, P. McElhany, D. S. Busch, M. T. Maher, T. K. Bammler, J. W. MacDonald, and E. P. Gallagher. 2019. Elevated CO<sub>2</sub> impairs olfactory-mediated neural and behavioral responses and gene expression in ocean-phase coho salmon (*Oncorhynchus kisutch*). *Global Change Biology* 25:963-977.
- 1784 Williams, J. G., R. W. Zabel, R. S. Waples, J. A. Hutchings, and W. P. Connor. 2008. Potential for anthropogenic disturbances to influence evolutionary change in the life history of a threatened salmonid. *Evolutionary*
- 1785 Williams, J. G., S. G. Smith, J. K. Fryer, M. D. Scheuerell, W. D. Muir, T. A. Flagg, R. W. Zabel, J. W. Ferguson, and E. Casillas. 2014. Influence of ocean and freshwater conditions on Columbia River sockeye salmon *Oncorhynchus*
- 1786 Williams, R., T. A. Okey, S. S. Wallace, and V. F. Gallucci. 2010. Shark aggregation in coastal waters of British Columbia. *Marine Ecology-Progress Series* 414:249-256.
- 1787 Willis, A. D., R. A. Peek, and A. L. Rypel. 2021. Classifying California's stream thermal regimes for cold-water
- 1788 Willmes, M., E. E. Jacinto, L. S. Lewis, R. A. Fichman, Z. Bess, G. Singer, A. Steel, P. Moyle, A. L. Rypel, N. Fangue, J. J. G. Glessner, J. A. Hobbs, and E. D. Chapman. 2021. Geochemical Tools Identify the Origins of Chinook Salmon
- 1789 Wilsey, C. B., J. J. Lawler, E. P. Maurer, D. McKenzie, P. A. Townsend, R. Gwozdz, J. A. Freund, K. Hagmann, and K. M. Hutten. 2013. Tools for assessing climate impacts on fish and wildlife. *Journal of Fish and Wildlife Management*
- 1790 Wilson, K. L., C. J. Bailey, T. D. Davies, and J. W. Moore. 2021. Marine and freshwater regime changes impact a community of migratory Pacific salmonids in decline. *Glob Chang Biol*.
- 1791 Wilson, S. M., T. W. Buehrens, J. L. Fisher, K. L. Wilson, and J. W. Moore. 2021. Phenological mismatch, carryover effects, and marine survival in a wild steelhead trout *Oncorhynchus mykiss* population. *Progress in Oceanography*
- 1792 Winans, A. K., and J. E. Purcell. 2010. Effects of pH on asexual reproduction and statolith formation of the scyphozoan, *Aurelia labiata*. *Hydrobiologia* 645:39-52.
- 1793 Winans, G. A., J. Baker, M. McHenry, L. Ward, and J. Myers. 2017. Genetic Characterization of *Oncorhynchus mykiss* Prior to Dam Removal with Implications for Recolonization of the Elwha River Watershed, Washington.
- 1794 Windler, G., J. R. Brooks, H. M. Johnson, R. L. Comeleo, R. Coulombe, and G. J. Bowen. 2021. Climate Impacts on Source Contributions and Evaporation to Flow in the Snake River Basin Using Surface Water Isoscapes ( $\delta$ H-2
- 1795 Winfree, M. M., E. Hood, S. L. Stuefer, D. E. Schindler, T. J. Cline, C. D. Arp, and S. Pyare. 2018. Landcover and geomorphology influence streamwater temperature sensitivity in salmon bearing watersheds in Southeast Alaska.
- 1796 Winsor, S., S. Blumenshine, P. Adelizi, and M. Bigelow. 2021. Precocious Maturation in Spring-Run Chinook Salmon Is Affected by Incubation Temperature, Feeding Regime, and Parentage. *Transactions of the American Fisheries*
- 1797 Wiseman, C. D., M. LeMoine, and S. Cormier. 2010. Assessment of probable causes of reduced aquatic life in the Touchet River, Washington, USA. *Human and Ecological Risk Assessment* 16:87-115.
- 1798 Woelfle-Erskine, C. 2017. Collaborative approaches to flow restoration in intermittent salmon-bearing streams:
- 1799 Wolf, S. G., M. A. Snyder, W. J. Sydeman, D. F. Doak, and D. A. Croll. 2010. Predicting population consequences of ocean climate change for an ecosystem sentinel, the seabird Cassin's auklet. *Global Change Biology* 16:1923-1935.
- 1800 Wolf, S. L., and S. K. Brewer. 2021. Survival and Movement Patterns of Rainbow Trout Stocked in a Groundwater-Influenced Warmwater Stream. *North American Journal of Fisheries Management* 41:600-615.
- 1801 Wong, C., and M. Rylko. 2014. Health of the Salish Sea as measured using transboundary ecosystem indicators. *Aquatic Ecosystem Health & Management* 17:463-471.
- 1802 Wong, J. M., K. M. Johnson, M. W. Kelly, and G. Hofmann. 2018. Transcriptomics reveal transgenerational effects in purple sea urchin embryos: Adult acclimation to upwelling conditions alters the response of their progeny to
- 1803 Woo, I., M. J. Davis, C. S. Ellings, G. Nakai, J. Y. Takekawa, and S. De La Cruz. 2018. Enhanced invertebrate prey production following estuarine restoration supports foraging for multiple species of juvenile salmonids
- 1804 Woo, I., M. J. Davis, C. S. Ellings, S. Hodgson, J. Y. Takekawa, G. Nakai, and S. E. W. De La Cruz. 2019. A Mosaic of Estuarine Habitat Types with Prey Resources from Multiple Environmental Strata Supports a Diversified Foraging Portfolio for Juvenile Chinook Salmon. *Estuaries and Coasts* 42:1938-1954.
- 1805 Woodruff, P., B. T. Poorten, V. Christensen, and C. J. Walters. 2021. Reservoir fertilisation and fishery response in a highly managed reservoir with uncertain flows: Ecosystem-based management using decision analysis. *Fisheries*
- 1806 Woodward, G., O. Morris, J. Barquin, A. Belgrano, C. Bull, E. de Eyto, N. Friberg, G. Guobergsson, K. Layer-Dobra, R. B. Lauridsen, H. M. Lewis, P. McGinnity, S. Pawar, J. Rosindell, and E. J. O'Gorman. 2021. Using Food Webs and Metabolic Theory to Monitor, Model, and Manage Atlantic Salmon-A Keystone Species Under Threat. *Frontiers in*
- 1807 Worden, L., L. W. Botsford, A. Hastings, and M. D. Holland. 2010. Frequency responses of age-structured populations Pacific salmon as an example. *Theoretical Population Biology* 78:239-249.
- 1808 Wright, R. F., R. M. Couture, A. B. Christiansen, J. L. Guerrero, O. Kaste, and B. T. Barlaup. 2017. Effects of multiple stresses hydropower, acid deposition and climate change on water chemistry and salmon populations in the River

- 1809 Wu, H., J. S. Kimball, M. M. Elsner, N. Mantua, R. F. Adler, and J. Stanford. 2012. Projected climate change impacts on the hydrology and temperature of Pacific Northwest rivers. *Water Resources Research* 48:W11530.
- 1810 Xiong, Y. H., M. Huang, Y. G. Zhou, X. W. Chen, J. W. Yang, F. Wang, and S. L. Dong. 2020. Growth, osmoregulation and energy budget of rainbow and steelhead trout under different salinity acclimation methods and the best
- 1811 Xu, C. L., B. H. Letcher, and K. H. Nislow. 2010. Context-specific influence of water temperature on brook trout growth rates in the field. *Freshwater Biology* 55:2253-2264.
- 1812 Xu, C. L., B. H. Letcher, and K. H. Nislow. 2010. Size-dependent survival of brook trout *Salvelinus fontinalis* in summer: Effects of water temperature and stream flow. *Journal of Fish Biology* 76:2342-2369.
- 1813 Xu, L. M., J. Z. Zhao, M. Liu, G. M. Ren, S. C. Han, Y. Z. Shao, Y. S. Cao, H. B. Liu, and T. Y. Lu. 2021. Infectious hematopoietic necrosis virus enhanced infectious pancreatic necrosis virus multiplication during co-infection in
- 1814 Xu, L. M., M. Liu, J. Z. Zhao, G. M. Ren, Y. Dong, Y. Z. Shao, T. Y. Lu, and Q. Y. Zhang. 2020. Infectious pancreatic necrosis virus inhibits infectious hematopoietic necrosis virus at the early stage of infection in a time dependent manner during Co-infection in Chinook salmon embryo cell lines. *Fish & Shellfish Immunology* 102:361-367.
- 1815 Xu, Y., A. S. Decker, C. K. Parken, L. M. Ritchie, D. A. Patterson, and C. H. Fu. 2020. Climate effects on size-at-age and growth rate of Chinook Salmon (*Oncorhynchus tshawytscha*) in the Fraser River, Canada. *Fisheries*
- 1816 Xu, Y., C. H. Fu, A. Pena, R. Hourston, R. Thomson, C. Robinson, J. Cleary, K. Daniel, and M. Thompson. 2019. Variability of Pacific herring (*Clupea pallasii*) spawn abundance under climate change off the West Coast of
- 1817 Yamada, H., and S. Wada. 2021. Morphological evolution reduces downstream displacement in juvenile
- 1818 Yamamoto, T., S. Kitanishi, M. Sato, M. Yagisawa, and D. Kishi. 2021. Links between paternal life history and offspring metabolic rate and body size during early life in masu salmon *Oncorhynchus masou*. *Ecology of*
- 1819 Yan, G. J., X. K. He, Z. D. Cao, and S. J. Fu. 2012. The trade-off between steady and unsteady swimming performance in six cyprinids at two temperatures. *Journal of Thermal Biology* 37:424-431.
- 1820 Yarnell, S. M., E. D. Stein, J. A. Webb, T. Grantham, R. A. Lusardi, J. Zimmerman, R. A. Peek, B. A. Lane, J. Howard, and S. Sandoval-Solis. 2020. A functional flows approach to selecting ecologically relevant flow metrics for environmental flow applications. *River Research and Applications* 36:318-324.
- 1821 Yarnell, S. M., J. H. Viers, and J. F. Mount. 2010. Ecology and management of the spring snowmelt recession.
- 1822 Yasumiishi, E. M., E. V. Farley, J. Maselko, K. Y. Aydin, K. A. Kearney, A. J. Hermann, G. T. Ruggerone, K. G. Howard, and W. W. Strasburger. 2020. Differential north-south response of juvenile Chinook salmon (*Oncorhynchus tshawytscha*) marine growth to ecosystem change in the eastern Bering Sea, 1974-2010. *Ices Journal of Marine*
- 1823 Yasumiishi, E. M., K. Cieciel, A. G. Andrews, J. Murphy, and J. A. Dimond. 2020. Climate-related changes in the biomass and distribution of small pelagic fishes in the eastern Bering Sea during late summer, 2002-2018. *Deep-*
- 1824 Yates, D., H. Galbraith, D. Purkey, A. Huber-Lee, J. Sieber, J. West, S. Herrod-Julius, and B. Joyce. 2008. Climate warming, water storage, and Chinook salmon in California's Sacramento Valley. *Climatic Change* 91:335-350.
- 1825 Yati, E., S. Minobe, N. Mantua, S. Ito, and E. Di Lorenzo. 2020. Marine Ecosystem Variations Over the North Pacific and Their Linkage to Large-Scale Climate Variability and Change. *Frontiers in Marine Science* 7.
- 1826 Yeakel, J. D., J. P. Gibert, T. Gross, P. A. H. Westley, and J. W. Moore. 2018. Eco-evolutionary dynamics, density-dependent dispersal and collective behaviour: implications for salmon metapopulation robustness. *Philosophical*
- 1827 Yin, L. M., L. Chen, M. L. Wang, H. Q. Li, and X. M. Yu. 2021. An acute increase in water temperature can decrease the swimming performance and energy utilization efficiency in rainbow trout (*Oncorhynchus mykiss*). *Fish*
- 1828 Yochum, N., M. Stone, K. Breddermann, B. A. Berejikian, J. R. Gauvin, and D. J. Irvine. 2021. Evaluating the role of bycatch reduction device design and fish behavior on Pacific salmon (*Oncorhynchus* spp.) escapement rates from
- 1829 Young, R. G., J. Wilkinson, J. Hay, and J. W. Hayes. 2010. Movement and mortality of adult brown trout in the Motupiko River, New Zealand: Effects of water temperature, flow, and flooding. *Transactions of the American*
- 1830 Yu, H., H. S. Bi, B. Burke, J. Lamb, and W. Peterson. 2012. Spatial variations in the distribution of yearling spring Chinook salmon off Washington and Oregon using COZIGAM analysis. *Marine Ecology-Progress Series* 465:253-
- 1831 Yue, X., P. Huan, Y. H. Hu, and B. Z. Liu. 2018. Integrated transcriptomic and proteomic analyses reveal potential mechanisms linking thermal stress and depressed disease resistance in the turbot *Scophthalmus maximus*.
- 1832 Yvon-Durocher, G., J. M. Montoya, M. Trimmer, and G. Woodward. 2010. Warming alters the size spectrum and shifts the distribution of biomass in freshwater ecosystems. *Global Change Biology* 17:1681-1694.
- 1833 Zabel, R. W., and C. E. Jordan, editors. 2020. Life Cycle Models of Interior Columbia River Basin Spring/Summer-Run Chinook Salmon Populations, U.S. Department of Commerce, NOAA Technical Memorandum NMFS-NWFSC-
- 1834 Zabel, R. W., B. J. Burke, M. L. Moser, and C. C. Caudill. 2014. Modeling temporal phenomena in variable environments with parametric models: An application to migrating salmon. *Ecological Modelling* 273:23-30.

- 1835 Zabel, R. W., K. I. Haught, and P. M. Chittaro. 2010. Variability in fish size/otolith radius relationships among populations of Chinook salmon. *Environmental Biology of Fishes* 89:267-278.
- 1836 Zanuzzo, F. S., A. Beemelmans, J. R. Hall, M. L. Rise, and A. K. Gamperl. 2020. The Innate Immune Response of Atlantic Salmon (*Salmo salar*) Is Not Negatively Affected by High Temperature and Moderate Hypoxia. *Frontiers in*
- 1837 Zarri, L. J., E. M. Danner, M. E. Daniels, and E. P. Palkovacs. 2019. Managing hydropower dam releases for water users and imperiled fishes with contrasting thermal habitat requirements. *Journal of Applied Ecology* 56:2423-
- 1838 Zavolokin, A. V., V. V. Kulik, and L. O. Zavarina. 2014. The food supply of the Pacific salmon of the genus *Oncorhynchus* in the northwestern Pacific Ocean. 1. The dynamics of the food spectra and feeding intensity.
- 1839 Zavolokin, A. V., V. V. Kulik, and L. O. Zavarina. 2014. The food supply of the Pacific salmon of the genus *Oncorhynchus* in the northwestern Pacific Ocean. 2. Comparative characterization and general state. *Russian*
- 1840 Zavorka, L., A. Crespel, N. J. Dawson, M. Papatheodoulou, S. S. Killen, and M. J. Kainz. 2021. Climate change-induced deprivation of dietary essential fatty acids can reduce growth and mitochondrial efficiency of wild
- 1841 Zeigler, M. P., A. S. Todd, and C. A. Caldwell. 2012. Evidence of recent climate change within the historic range of Rio Grande cutthroat trout: Implications for management and future persistence. *Transactions of the American*
- 1842 Zeug, S. C., J. Wiesenfeld, K. Sellheim, A. Brodsky, and J. E. Merz. 2019. Assessment of Juvenile Chinook Salmon Rearing Habitat Potential Prior to Species Reintroduction. *North American Journal of Fisheries Management*
- 1843 Zeug, S. C., K. Sellheim, C. Watry, J. D. Wikert, and J. Merz. 2014. Response of juvenile Chinook salmon to managed flow: lessons learned from a population at the southern extent of their range in North America. *Fisheries*
- 1844 Zeug, S. C., K. Sellheim, J. Melgo, and J. E. Merz. 2019. Spatial variation of juvenile Chinook Salmon (*Oncorhynchus tshawytscha*) survival in a modified California river. *Environmental Biology of Fishes*:15.
- 1845 Zeug, S. C., L. K. Albertson, H. Lenihan, J. Hardy, and B. Cardinale. 2011. Predictors of Chinook salmon extirpation in California's Central Valley. *Fisheries Management and Ecology* 18:61-71.
- 1846 Zeug, S. C., P. S. Bergman, B. J. Cavallo, and K. S. Jones. 2012. Application of a life cycle simulation model to evaluate impacts of water management and conservation actions on an endangered population of Chinook
- 1847 Zhang, X., H. Y. Li, Z. Q. D. Deng, L. R. Leung, J. R. Skalski, and S. J. Cooke. 2019. On the variable effects of climate change on Pacific salmon. *Ecological Modelling* 397:95-106.
- 1848 Zheng, X. H., Q. G. Wang, L. H. Zhou, Q. Sun, and Q. Li. 2018. Predictive contributions of snowmelt and rainfall to streamflow variations in the western United States. *Advances in Meteorology* 2018:3765098.
- 1849 Zillig, K. W., R. A. Lusardi, P. B. Moyle, and N. A. Fangue. 2021. One size does not fit all: variation in thermal eco-physiology among Pacific salmonids. *Reviews in Fish Biology and Fisheries* 31:95-114.
- 1850 Zimmerman, M. S., C. Kinsel, E. Beamer, E. J. Connor, and D. E. Pflug. 2015. Abundance, Survival, and Life History Strategies of Juvenile Chinook Salmon in the Skagit River, Washington. *Transactions of the American Fisheries*
- 1851 Zinn, K. R., J. S. Rosenfeld, and E. B. Taylor. 2021. Effects of experimental flow manipulations on water quality, hypoxia, and growth of Threatened Salish sucker (*Catostomus* sp. cf. *catostomus*) and juvenile coho salmon (*Oncorhynchus kisutch*). *Canadian Journal of Fisheries and Aquatic Sciences* 78:1234-1246.
- 1852 Zorn, T. G., J. M. Hessenauer, and T. C. Wills. 2020. Increasing connectivity of Great Lakes tributaries: Interspecific and intraspecific effects on resident brook trout and brown trout populations. *Ecology of Freshwater Fish* 29:519-
- 1853 Zydlewski, G. B., D. S. Stich, and S. D. McCormick. 2014. Photoperiod control of downstream movements of Atlantic salmon *Salmo salar* smolts. *Journal of Fish Biology* 85:1023-1041.
