# Supplementary material for: A Comprehensive Review of the Impacts of Climate Change on Salmon: Strengths and Weaknesses of the Literature by Life Stage
Source: MDPI journal article supplement (doi:10.3390/fishes8060319), 2023-06-16
Supplement: s1 [file s1]

*Journal: Fishes, Special Issue: Effect of Climate Change on Salmonid Fishes in Rivers*

**Supplement S1:** *A comprehensive review of the impacts of climate change on salmon: strengths and weaknesses of the literature by life stage*

**Supporting information for:**

*A comprehensive review of the impacts of climate change on salmon: strengths and weaknesses of the literature by life stage*

*Lisa G. Crozier<sup>1</sup> and J. E. Siegel<sup>2</sup>*

*1. Northwest Fisheries Science Center, NOAA Fisheries*

*2. Ocean Associates, Inc. Under contract to NWFSC. Current address: PACE Engineers, Inc. 3501 Colby Ave Suite 101, Everett, WA 98201*

**Key words:** *anadromous fish; ecological responses to climate change; future projections; global change; ocean; freshwater*

## **SUPPLEMENT S1 CONTENTS**

|                                                                                                                      |    |
|----------------------------------------------------------------------------------------------------------------------|----|
| Supplement S1: Quantitative analysis of categories across the entire database .....                                  | 1  |
| Biological driver and response processes .....                                                                       | 1  |
| Study type .....                                                                                                     | 1  |
| Life stage.....                                                                                                      | 2  |
| Region and species.....                                                                                              | 3  |
| Study duration.....                                                                                                  | 5  |
| Literature Cited.....                                                                                                | 7  |
| Table S1 Description of the criteria used to assign each label .....                                                 | 8  |
| Table S2 The number of papers assigned to each label across the database as a whole and within each life stage. .... | 10 |
| Figure S1 Panel plots for each life stage and label, showing the number and percent of papers in each label.....     | 14 |

## Supplement S1: Quantitative analysis of categories across the entire database

### *Biological driver and response processes*

Across our dataset as a whole, demographics was the most commonly studied response process (47%), followed by physiology (35%) and dispersal (i.e., migration behavior and habitat use, 24%, Figure S1, right). Among driver processes, environmental conditions were incorporated into the majority of studies (79%), reflecting their importance in our search criteria, followed by species interactions (33%) and management (24%) (Figure S1, left). Evolutionary dynamics were the least-studied process. Nonetheless, 140 papers (8%) provided evidence on interactions between environmental conditions and genetic characteristics, with an additional 59 papers addressing some sort of adaptation in response to climate (combined, 11%).

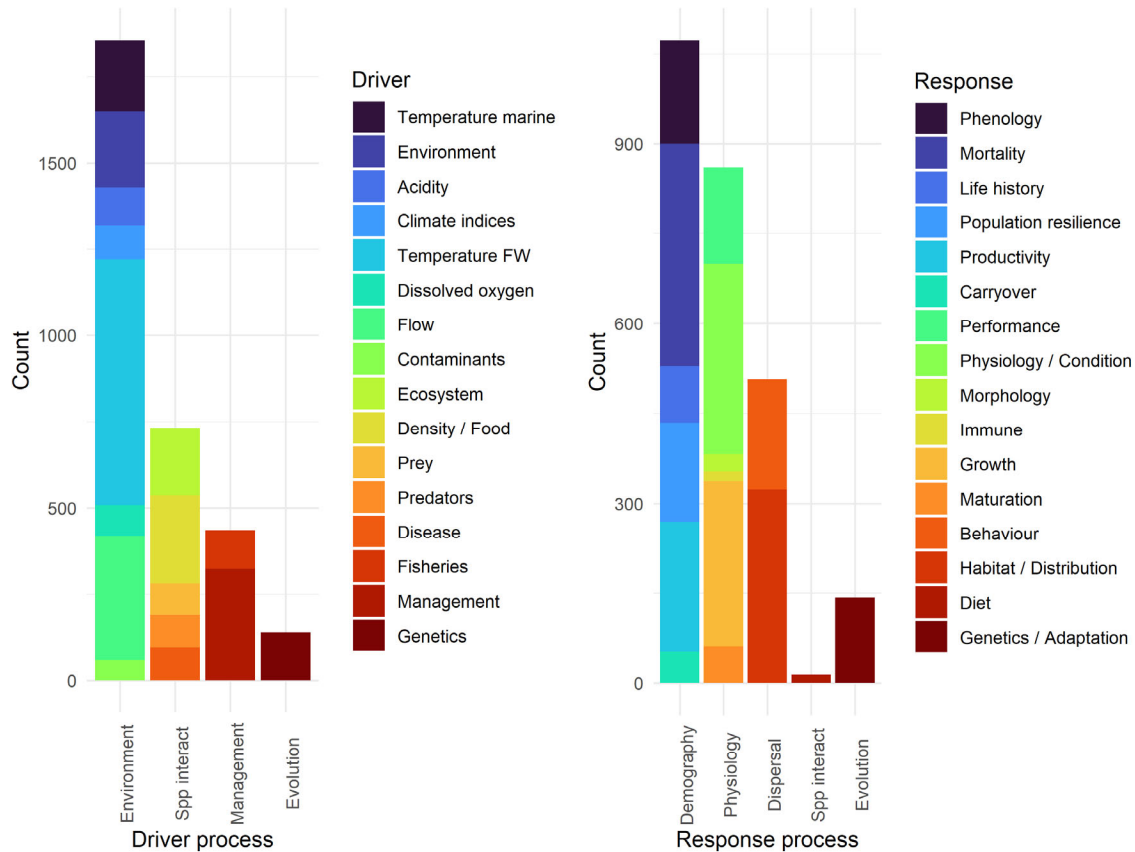

**Figure S1.** Count of papers within each *driver process* (left) and *response process* (right), showing the proportion of individual keywords (colors) that fell into each label (x-axis).

### *Study type*

Across the database as a whole, the majority of studies contained a field or remote sensing component (57%) followed by lab/experimental studies (21%), modeling studies (16%), and reviews or meta-analyses (11%). Note that studies were only given the modeling label if the model was a focus of the paper (e.g., methods paper), the model was

used for future projections, or modeling was mechanistic or theoretical. Statistical correlative modeling papers, which were common, were not given this label. Theoretical/opinion papers comprised only 5% of our dataset, and papers projecting impacts of climate change directly on salmon only 4%. We also reviewed a handful of papers that predicted relevant ecosystem and physical impacts from climate change, with each comprising 2%, which is just a fraction of that larger literature. However, the frequency of different study types varied by life stage, reflecting the areas of research and the tractability of different types of research in different habitats.

### *Life stage*

We compared the relative frequency of papers studying different life stages. The juvenile rearing stages in freshwater (33%) and saltwater (28%) were the stages that were addressed most commonly. Migration stages were highlighted in 10% and 14% of the papers for downstream and upstream directions respectively. Egg, spawning and population level analyses constituted 6%, 7%, and 9% of the database respectively. Response metrics were also studied at different frequencies by life stage (Figure S2).

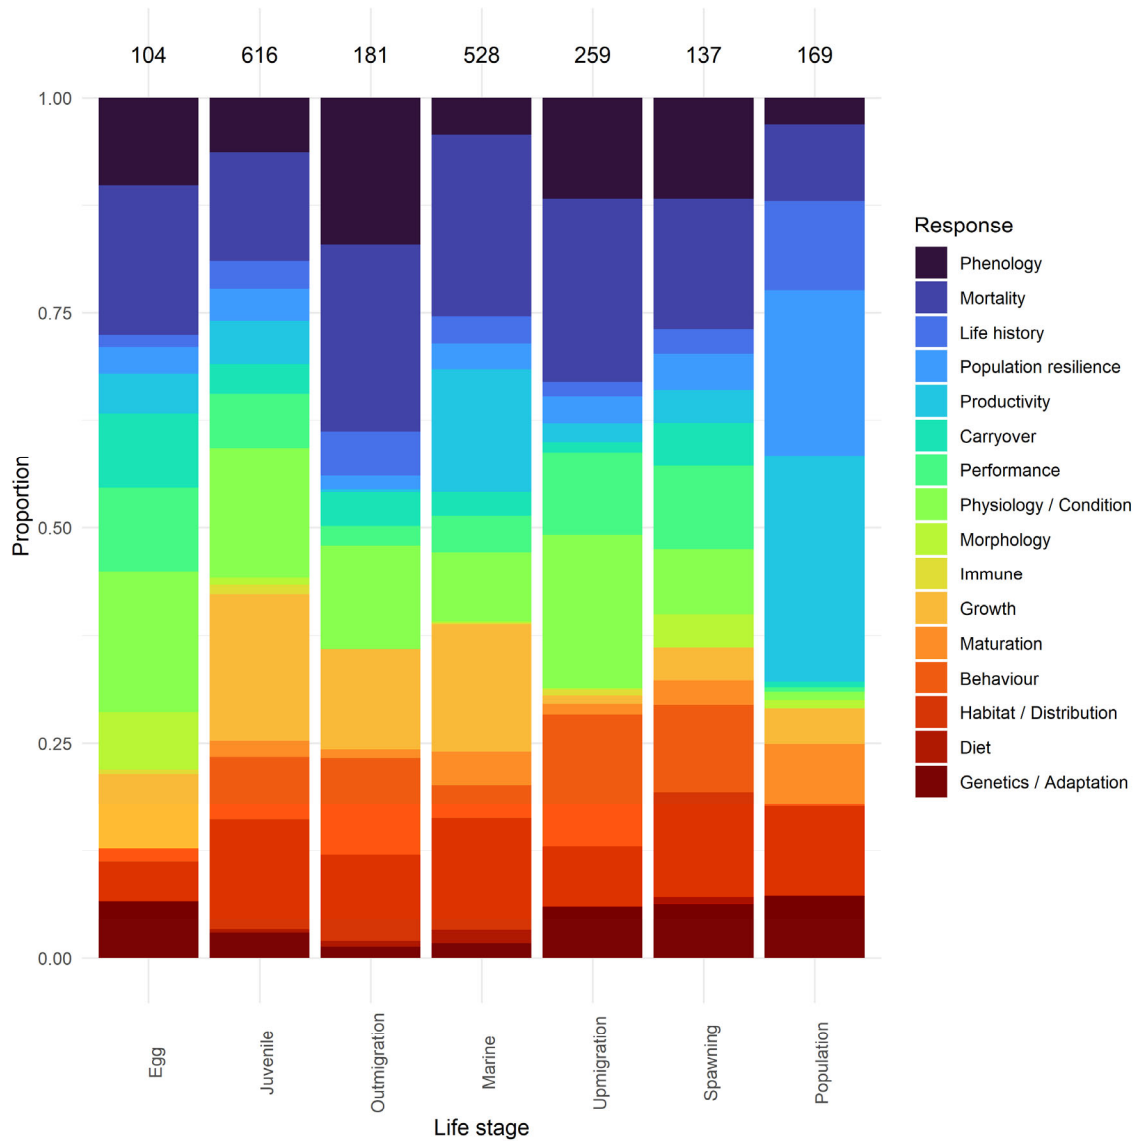

**Figure S2.** Relative proportion of papers in each life stage that involved different response metrics. The absolute number of papers represented in each column is at the top. The juvenile stage refers to the freshwater rearing portion of the life cycle.

### *Region and species*

Our focal region was the PNW, especially the Columbia River Basin, and we found 483 papers within this region (Figure 3). The marine migration of PNW populations overlaps with that of populations from California, British Columbia and Alaska, as well as the Far East. These areas also constitute the historical range of our focal species, and thus are also well represented in our study (569 unique papers on the west coast of North America outside the Pacific Northwest, and 48 from the Far East regions of Russia and Japan). Pacific salmon have been introduced or used in aquaculture in many other locations, and studies from these sites can reveal how salmon

respond and adapt to new environmental conditions (35 papers were from South America, other parts of Asia, Africa or Australia/New Zealand).

Chinook (*O. tshawytscha*) and steelhead (*O. mykiss*) were the most common species studied in the PNW and California, whereas sockeye salmon (*O. nerka*) was predominant in British Columbia and Alaska. Atlantic salmon and brown trout (*Salmo trutta*) were more common in Europe.

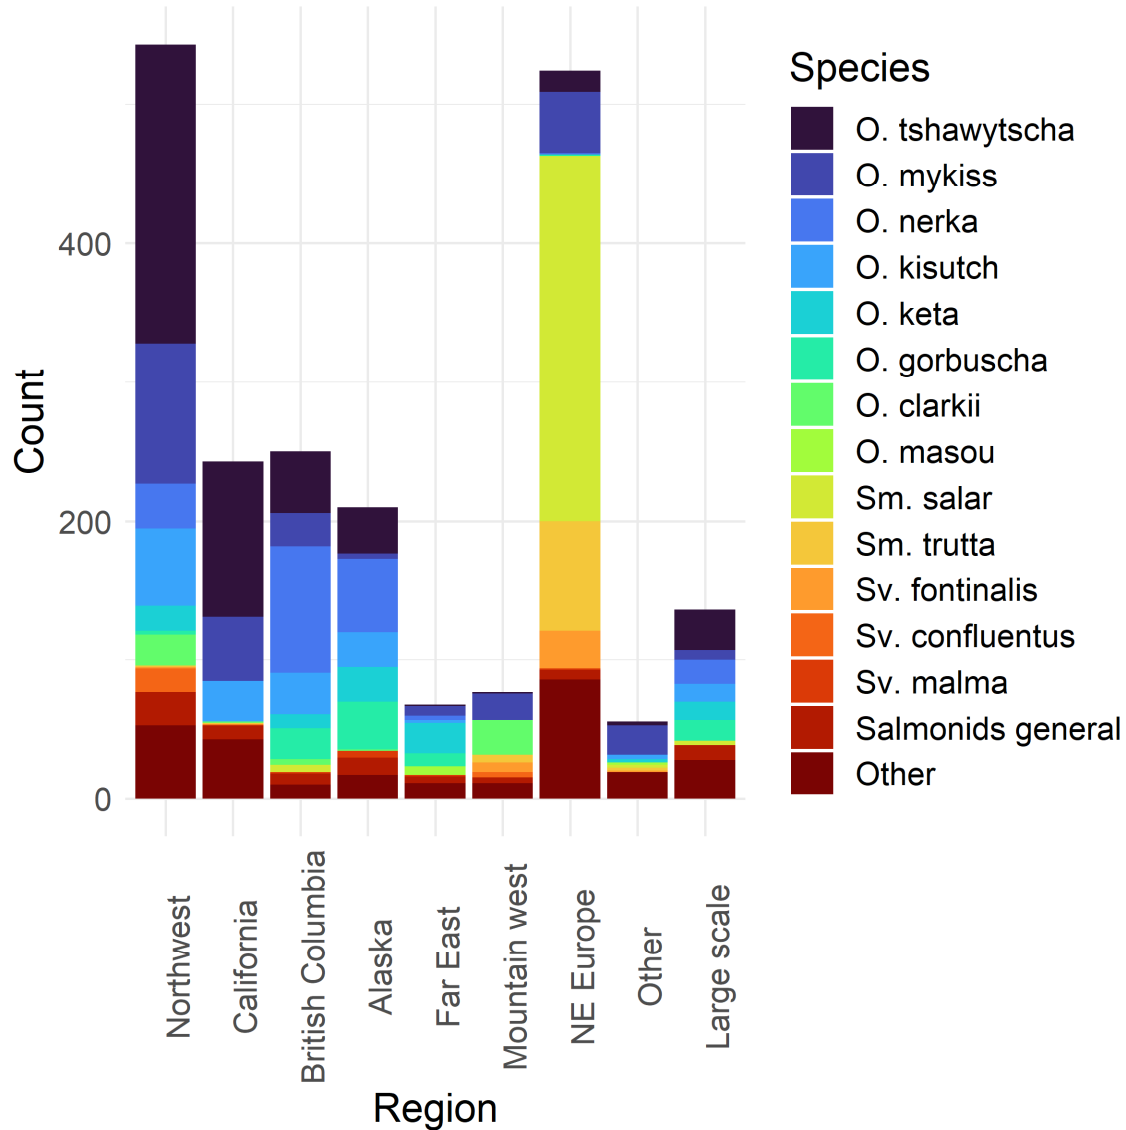

**Figure 3.** Count of species label designations by region for reviewed papers. Note that individual papers may address multiple species, so the total count reflects the number of times individual species were mentioned within a region, not the number of unique papers.

Atlantic salmon and other trout species also provide analogous case studies for Pacific salmon in many situations, explaining the high number of papers from eastern North America (179), Europe (299), and interior rivers of the Rocky Mountains (53).

Numerous papers (118, 6%) spanned multiple regions, especially oceanographic regions such as the North Pacific or California Current. Counts of papers for all labels are shown in Supplement S1: Table S2. Note that because a single paper can have multiple labels within each category, the number of unique papers is not necessarily the sum of the number for each label.

*O. mykiss* and *S. salar* were represented somewhat more than other species when looking at studies of evolutionary process (these species constituted 14% of studies that focused on evolution, compared with the two species' representation in the database overall, 11%). Rainbow trout (*O. mykiss*) and Atlantic salmon are intensively cultivated and therefore often studied within the context of genetic engineering, while landlocked redband trout (*O. mykiss*) displays especially extensive local climate adaptation, facilitating mapping between genetic characteristics and environmental gradients.

#### *Study duration*

The duration of studies in our database was characterized largely by either very short (1 year or less: 55%, 2-5 years: 18%) or very long (over 10 years: 25%) study periods. Of the long study periods, most capitalized on long environmental and population time series, and were more frequent for marine stage or whole life cycle analyses (Figure 4). A few papers that covered long time series also tested specific hypotheses with short-term experiments (4 papers). One unusual paper explored a 23-year history of columnaris disease in fish farms (Pulkkinen et al. 2010).

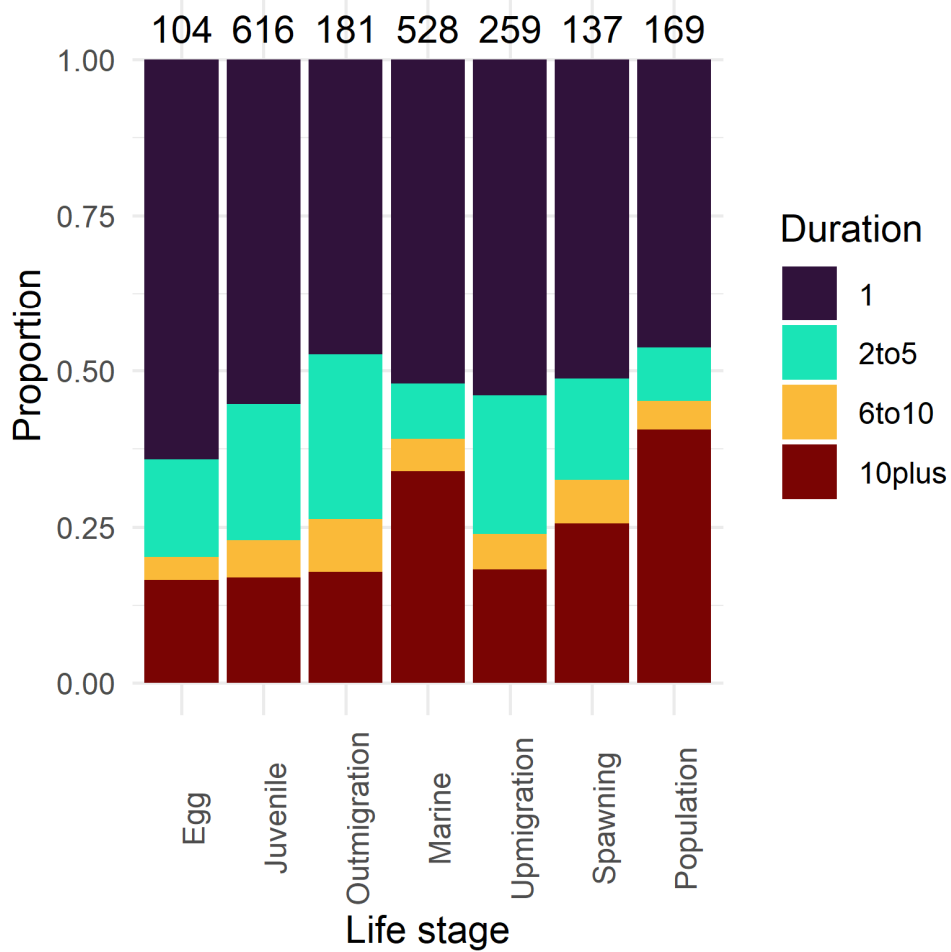

**Figure 4.** Proportion of papers within each life stage that spanned the designated study duration, in years. The absolute number of papers represented is the top of each column.

Long time-series are particularly important for understanding salmon responses to climate change because long-term climate trends may differ from those resulting from short-term annual or decadal variation. For example, using sediment evidence from the Holocene, Finney et al. (2010) found that fish population abundance often tracked decadal cycles in ocean conditions over centuries. Indices such as the El Niño Southern Oscillation and the Pacific Decadal Oscillation reflect distinct physical and ecological regime shifts, which are often associated with changes in salmon marine survival rates. Detangling long-term trends due to climate change, and the emergence of novel physical and ecological conditions, in the sense that not only individual conditions, but combinations of conditions that have not been exhibited before (Smith et al. 2022), is an important component of future projections.

## Literature Cited

- Finney, B. P., J. Alheit, K. C. Emeis, D. B. Field, D. Gutierrez, and U. Struck. 2010. Paleoeological studies on variability in marine fish populations: A long-term perspective on the impacts of climatic change on marine ecosystems. *Journal of Marine Systems* **79**:316-326.
- Pulkkinen, K., L. R. Suomalainen, A. F. Read, D. Ebert, P. Rintamaki, and E. T. Valtonen. 2010. Intensive fish farming and the evolution of pathogen virulence: The case of columnaris disease in Finland. *Proceedings of the Royal Society B-Biological Sciences* **277**:593-600.
- Smith, J. A., M. Pozo Buil, J. Fiechter, D. Tommasi, and M. G. Jacox. 2022. Projected novelty in the climate envelope of the California Current at multiple spatial-temporal scales. *PLOS Climate* **1**:e0000022.

Table S1: Description of the criteria used to assign each label

List of labels within categories assigned to all papers, with brief definition of labels. Papers were assigned multiple labels within a category, as appropriate to papers covering multiple species, life stages, etc.

| Category/labels                 | Description                                                                |
|---------------------------------|----------------------------------------------------------------------------|
| <b>Species</b>                  |                                                                            |
| <i>Oncorhynchus clarkii</i>     | Cutthroat trout                                                            |
| <i>Oncorhynchus gorbuscha</i>   | Pink salmon                                                                |
| <i>Oncorhynchus keta</i>        | Chum salmon                                                                |
| <i>Oncorhynchus kisutch</i>     | Coho salmon                                                                |
| <i>Oncorhynchus masou</i>       | Masu salmon                                                                |
| <i>Oncorhynchus mykiss</i>      | Rainbow trout/steelhead                                                    |
| <i>Oncorhynchus nerka</i>       | Sockeye salmon                                                             |
| <i>Oncorhynchus tshawytscha</i> | Chinook salmon                                                             |
| <i>Salmo salar</i>              | Atlantic salmon                                                            |
| <i>Salvelinus confluentus</i>   | Bull trout                                                                 |
| <i>Salvelinus fontinalis</i>    | Brook trout                                                                |
| <i>Salvelinus malma</i>         | Dolly Varden                                                               |
| <i>Salmo trutta</i>             | Brown trout                                                                |
| Other fish                      | Other fish species                                                         |
| Other species                   | Other non-fish species                                                     |
| General                         | Non-specific species deemed relevant                                       |
| <b>Life Stage</b>               |                                                                            |
| Egg                             | Egg incubation through emergence                                           |
| Juvenile                        | Freshwater juvenile rearing                                                |
| Juvenile migration              | Juvenile migration to the ocean as smolt                                   |
| Marine                          | Marine rearing, growth, and survival                                       |
| Adult migration                 | Adult spawning migration, including pre-spawn holding                      |
| Spawning                        | Spawning                                                                   |
| Population                      | Productivity, demographic trends, or population resiliency—any stage       |
| Evolution                       | Explicit use of evolutionary methods or perspective,                       |
| Freshwater habitat              | Freshwater habitat (may not be specific to a life stage)                   |
| General                         | Issues not specific to salmon or life stage, but determined to be relevant |
| <b>Region</b>                   |                                                                            |
| Africa                          | Populations from Africa                                                    |
| Alaska                          | Populations from Alaska                                                    |
| Australia New Zealand           | Populations from Australia and New Zealand                                 |
| British Columbia                | Populations from British Columbia, Canada                                  |
| California                      | Populations from California, USA                                           |
| Asia other                      | Populations from countries in Asia other than Japan and Russia             |
| East North America              | Populations from Canada and the U.S. east of the Rocky Mountains           |
| Europe                          | Populations from Europe                                                    |
| Japan                           | Populations from Japan                                                     |
| Largescale                      | Encompassing three or more regions (e.g., ocean or large-scale climate)    |
| Mountain west                   | Populations from the Rocky Mountain or interior basins of U.S./Canada      |
| Northwest                       | Populations from Northwest region of the U.S.                              |
| Russia                          | Populations from Russia                                                    |
| South America                   | Populations from South America                                             |

**Table S1:** Continued.

| <b>Category/labels</b>      | <b>Description</b>                                                                                                                               |
|-----------------------------|--------------------------------------------------------------------------------------------------------------------------------------------------|
| <b>Sub-region</b>           |                                                                                                                                                  |
| Alaska SE                   | Southeast Alaska from Yakutat to southern tip of Alaskan panhandle                                                                               |
| Alaska S                    | South Alaska draining into Gulf of Alaska from Aleutians to Yakutat                                                                              |
| Alaska W                    | Western and central Alaska draining into the Bering Sea or the Arctic                                                                            |
| California N                | Northern coastal California from San Francisco Bay to Oregon border                                                                              |
| California S                | Southern coastal California from Mexican border to San Francisco Bay                                                                             |
| California CV               | Central Valley CA from San Joaquin and Sacramento Basins to SF Bay                                                                               |
| British Columbia non Fraser | Areas of British Columbia outside Fraser River watershed                                                                                         |
| Northwest Coastal           | Coastal Oregon and Washington State                                                                                                              |
| British Columbia Fraser     | Areas of British Columbia, Canada within Fraser River watershed                                                                                  |
| Northwest Columbia          | Columbia River watershed, U.S. Pacific Northwest                                                                                                 |
| Northwest Puget Sound       | Puget Sound watershed, Washington State                                                                                                          |
| <b>Study type</b>           |                                                                                                                                                  |
| Field remote sensing        | Data collected in the field and/or by remote transmitted data                                                                                    |
| Lab experimental            | Lab experiments or field experimental designs                                                                                                    |
| Model                       | Model as focus (e.g., methods, life cycle models) or those used to make future projections. Statistical models describing relationships excluded |
| Projections ecosystem       | Climate change projections for ecosystems deemed relevant to salmon but not specifically projecting salmon                                       |
| Projections physical        | Physical climate change projections deemed relevant to salmon                                                                                    |
| Projections salmon          | Climate change projections for salmon populations                                                                                                |
| Review meta-analysis        | Reviews and meta-analyses                                                                                                                        |
| Theory/opinion              | Theoretical and opinion                                                                                                                          |
| <b>Study duration</b>       |                                                                                                                                                  |
| 1                           | Study or time-series of 1 year or less                                                                                                           |
| 2-5                         | Study or time-series of 2-5 years                                                                                                                |
| 6-10                        | Study or time-series of 6-10 years                                                                                                               |
| 10+                         | Study or time-series of over 10 years                                                                                                            |
| NA                          | No applicable study period or time-series (often theoretical)                                                                                    |

Table S2: The number of papers assigned to each label across the database as a whole and within each life stage.

Counts of papers that received the labels listed in Table S1. "All" column shows the number and proportion of unique papers with the label in the corresponding row from all papers in the database. Subsequent columns show the number of papers from the "All" column that were also assigned a life history or population label. Note that a single paper could be assigned multiple labels if, for example, multiple regions or life stages were explicitly addressed in that paper.

| Category/label          | All  |     | Egg | Juvenile | Juvenile<br>migrate | Marine | Adult<br>migrate | Spawn | Population |
|-------------------------|------|-----|-----|----------|---------------------|--------|------------------|-------|------------|
|                         | N    | (%) |     |          |                     |        |                  |       |            |
| <b>All</b>              | 1853 | 100 | 104 | 616      | 181                 | 528    | 259              | 137   | 169        |
| <b>Process driver</b>   |      |     |     |          |                     |        |                  |       |            |
| Environment             | 1459 | 79  | 92  | 529      | 151                 | 382    | 203              | 102   | 114        |
| Spp. interactions       | 602  | 33  | 9   | 213      | 54                  | 275    | 57               | 26    | 33         |
| Management              | 436  | 24  | 12  | 122      | 49                  | 94     | 81               | 32    | 62         |
| Evolution               | 140  | 8   | 16  | 33       | 6                   | 13     | 21               | 16    | 23         |
| <b>Process response</b> |      |     |     |          |                     |        |                  |       |            |
| Demography              | 861  | 47  | 73  | 259      | 120                 | 244    | 150              | 83    | 143        |
| Physiology              | 645  | 35  | 54  | 302      | 68                  | 158    | 95               | 50    | 32         |
| Dispersal               | 451  | 24  | 11  | 167      | 60                  | 97     | 77               | 48    | 34         |
| Evolution               | 143  | 8   | 13  | 28       | 4                   | 11     | 25               | 15    | 23         |
| Spp. interactions       | 14   | 1   | 0   | 4        | 2                   | 10     | 0                | 2     | 0          |
| <b>Driver</b>           |      |     |     |          |                     |        |                  |       |            |
| Freshwater temp         | 711  | 38  | 63  | 328      | 59                  | 56     | 144              | 62    | 56         |
| Habitat                 | 444  | 24  | 20  | 169      | 58                  | 36     | 48               | 36    | 42         |
| Flow                    | 361  | 20  | 30  | 154      | 45                  | 20     | 67               | 39    | 50         |
| Management              | 323  | 17  | 10  | 107      | 42                  | 55     | 54               | 25    | 43         |
| Density food            | 256  | 14  | 4   | 122      | 25                  | 107    | 6                | 15    | 18         |
| Environment             | 218  | 12  | 7   | 50       | 28                  | 104    | 10               | 6     | 19         |
| Temp marine             | 207  | 11  | 2   | 14       | 20                  | 170    | 10               | 4     | 24         |
| Ecosystem               | 195  | 11  | 1   | 23       | 5                   | 141    | 2                | 2     | 7          |
| Genetics                | 140  | 8   | 16  | 33       | 6                   | 13     | 21               | 16    | 23         |
| Methods                 | 119  | 6   | 4   | 21       | 12                  | 30     | 12               | 8     | 13         |
| Fisheries               | 113  | 6   | 0   | 6        | 1                   | 57     | 30               | 5     | 22         |
| Acidity                 | 113  | 6   | 2   | 14       | 3                   | 94     | 2                | 0     | 1          |
| Climate indices         | 97   | 5   | 3   | 10       | 5                   | 73     | 6                | 2     | 20         |
| Predators               | 96   | 5   | 0   | 27       | 16                  | 49     | 11               | 3     | 3          |
| Disease                 | 94   | 5   | 3   | 40       | 6                   | 25     | 41               | 7     | 0          |
| Prey                    | 91   | 5   | 1   | 30       | 13                  | 59     | 0                | 3     | 0          |
| Dissolved oxygen        | 90   | 5   | 12  | 36       | 10                  | 26     | 9                | 9     | 2          |
| Contaminants            | 58   | 3   | 2   | 29       | 8                   | 15     | 16               | 3     | 2          |
| Restoration             | 53   | 3   | 4   | 14       | 7                   | 1      | 3                | 4     | 7          |
| Invasive species        | 32   | 2   | 0   | 22       | 2                   | 0      | 1                | 0     | 5          |

**Table S2.** Continued.

| Category/label      | All  |     | Egg | Juvenile | Juvenile<br>migrate | Marine | Adult<br>migrate | Spawn | Population |
|---------------------|------|-----|-----|----------|---------------------|--------|------------------|-------|------------|
|                     | N    | (%) |     |          |                     |        |                  |       |            |
| Response            |      |     |     |          |                     |        |                  |       |            |
| Mortality           | 371  | 20  | 34  | 121      | 67                  | 136    | 89               | 36    | 28         |
| Habitat distribute  | 323  | 17  | 9   | 122      | 31                  | 84     | 29               | 29    | 33         |
| Physiol/condition   | 318  | 17  | 32  | 145      | 37                  | 52     | 74               | 18    | 3          |
| Growth              | 276  | 15  | 17  | 162      | 36                  | 95     | 4                | 9     | 13         |
| Productivity        | 217  | 13  | 9   | 49       | 1                   | 92     | 9                | 9     | 83         |
| Behavior            | 184  | 10  | 3   | 70       | 35                  | 25     | 64               | 24    | 1          |
| Phenology           | 172  | 9   | 20  | 61       | 53                  | 28     | 49               | 28    | 10         |
| Pop. resilience     | 166  | 9   | 6   | 35       | 5                   | 19     | 13               | 10    | 61         |
| Performance         | 161  | 9   | 19  | 60       | 7                   | 27     | 40               | 23    | 2          |
| Genetic/adapt       | 143  | 8   | 13  | 28       | 4                   | 11     | 25               | 15    | 23         |
| Life history        | 94   | 5   | 3   | 31       | 16                  | 21     | 7                | 7     | 33         |
| Maturation          | 61   | 3   | 0   | 18       | 3                   | 25     | 5                | 7     | 22         |
| Carryover           | 52   | 3   | 17  | 33       | 12                  | 18     | 5                | 12    | 2          |
| Morphology          | 29   | 2   | 13  | 8        | 0                   | 1      | 1                | 9     | 3          |
| Immune              | 16   | 1   | 1   | 10       | 0                   | 1      | 3                | 0     | 0          |
| Livelihood          | 14   | 1   | 0   | 0        | 0                   | 3      | 0                | 0     | 0          |
| Diet                | 14   | 1   | 0   | 4        | 2                   | 10     | 0                | 2     | 0          |
| Study type          |      |     |     |          |                     |        |                  |       |            |
| Field remote sense  | 1052 | 57  | 41  | 345      | 133                 | 322    | 166              | 94    | 102        |
| Lab experimental    | 379  | 21  | 55  | 195      | 33                  | 69     | 60               | 24    | 3          |
| Model               | 302  | 16  | 17  | 88       | 23                  | 84     | 31               | 21    | 53         |
| Meta-analysis       | 210  | 11  | 8   | 35       | 7                   | 78     | 23               | 8     | 22         |
| Theory/opinion      | 93   | 5   | 0   | 14       | 4                   | 24     | 6                | 1     | 14         |
| Projection salmon   | 68   | 4   | 6   | 28       | 6                   | 5      | 12               | 8     | 19         |
| Projection physical | 39   | 2   | 0   | 3        | 1                   | 14     | 0                | 1     | 0          |
| Projection ecosys   | 30   | 2   | 0   | 2        | 0                   | 24     | 0                | 0     | 0          |
| Study duration      |      |     |     |          |                     |        |                  |       |            |
| 1 year              | 1026 | 6   | 70  | 362      | 101                 | 338    | 151              | 82    | 81         |
| 10 plus years       | 457  | 3   | 18  | 111      | 38                  | 220    | 51               | 41    | 71         |
| 2-5 years           | 324  | 2   | 17  | 142      | 56                  | 57     | 62               | 26    | 15         |
| 6-10 years          | 115  | 1   | 4   | 39       | 18                  | 34     | 16               | 11    | 8          |

**Table S2.** Continued.

| Category/label | All |     | Egg | Juvenile | Juvenile<br>migrate | Marine | Adult<br>migrate | Spawn | Population |
|----------------|-----|-----|-----|----------|---------------------|--------|------------------|-------|------------|
|                | N   | (%) |     |          |                     |        |                  |       |            |
| Region         |     |     |     |          |                     |        |                  |       |            |
| Northwest      | 483 | 26  | 18  | 155      | 55                  | 133    | 75               | 48    | 39         |
| Europe         | 299 | 16  | 22  | 130      | 40                  | 76     | 27               | 15    | 40         |
| California     | 237 | 13  | 11  | 98       | 36                  | 65     | 25               | 13    | 18         |
| Brit Columbia  | 205 | 11  | 14  | 51       | 21                  | 70     | 57               | 15    | 14         |
| East N America | 179 | 10  | 15  | 70       | 13                  | 46     | 24               | 13    | 14         |
| Alaska         | 149 | 8   | 6   | 28       | 6                   | 61     | 27               | 18    | 16         |
| Largescale     | 118 | 6   | 0   | 6        | 1                   | 93     | 2                | 1     | 12         |
| Mountain west  | 53  | 3   | 4   | 25       | 0                   | 0      | 4                | 1     | 8          |
| Japan          | 34  | 2   | 2   | 10       | 4                   | 17     | 4                | 1     | 1          |
| Asia other     | 22  | 1   | 2   | 9        | 4                   | 3      | 2                | 1     | 2          |
| Australia/NZ   | 21  | 1   | 1   | 6        | 1                   | 12     | 2                | 2     | 0          |
| Russia         | 15  | 1   | 0   | 0        | 0                   | 10     | 1                | 0     | 3          |
| South America  | 10  | 1   | 2   | 2        | 0                   | 2      | 0                | 1     | 0          |
| Antarctica     | 2   | <1  | 0   | 0        | 0                   | 2      | 0                | 0     | 0          |
| Africa         | 1   | <1  | 0   | 0        | 0                   | 0      | 0                | 0     | 0          |
| Sub-region     |     |     |     |          |                     |        |                  |       |            |
| NW Columbia    | 304 | 16  | 12  | 113      | 38                  | 46     | 61               | 35    | 24         |
| BC Fraser      | 110 | 6   | 10  | 28       | 9                   | 19     | 48               | 11    | 7          |
| NW Coastal     | 106 | 6   | 1   | 18       | 5                   | 54     | 8                | 5     | 10         |
| California N   | 106 | 6   | 0   | 36       | 7                   | 43     | 17               | 6     | 6          |
| California CV  | 105 | 6   | 10  | 54       | 27                  | 14     | 10               | 8     | 10         |
| BC not Fraser  | 90  | 5   | 6   | 21       | 11                  | 46     | 9                | 6     | 7          |
| NW Puget Sound | 86  | 5   | 5   | 26       | 12                  | 29     | 8                | 10    | 11         |
| Alaska W       | 77  | 4   | 2   | 8        | 1                   | 33     | 18               | 11    | 9          |
| Alaska S       | 77  | 4   | 4   | 20       | 5                   | 27     | 11               | 8     | 11         |
| California S   | 54  | 3   | 1   | 11       | 4                   | 32     | 2                | 1     | 2          |
| Alaska SE      | 48  | 3   | 2   | 10       | 3                   | 19     | 11               | 8     | 4          |

**Table S2.** Continued.

| Category/label         | All |     | Egg | Juvenile | Juvenile<br>migrate | Marine | Adult<br>migrate | Spawn | Population |
|------------------------|-----|-----|-----|----------|---------------------|--------|------------------|-------|------------|
|                        | N   | (%) |     |          |                     |        |                  |       |            |
| <b>Species</b>         |     |     |     |          |                     |        |                  |       |            |
| <i>O. tshawytscha</i>  | 425 | 23  | 35  | 154      | 64                  | 118    | 77               | 51    | 42         |
| General                | 286 | 15  | 5   | 40       | 8                   | 103    | 14               | 5     | 14         |
| <i>Salmo salar</i>     | 267 | 14  | 13  | 104      | 44                  | 76     | 28               | 15    | 31         |
| <i>O. mykiss</i>       | 261 | 14  | 10  | 131      | 33                  | 26     | 45               | 15    | 21         |
| <i>O. nerka</i>        | 179 | 10  | 8   | 40       | 16                  | 52     | 64               | 21    | 20         |
| Other fish             | 160 | 9   | 12  | 41       | 5                   | 72     | 13               | 10    | 17         |
| <i>O. kisutch</i>      | 151 | 8   | 6   | 54       | 14                  | 36     | 25               | 14    | 20         |
| Salmonids gen          | 114 | 6   | 5   | 32       | 7                   | 19     | 13               | 6     | 11         |
| Other species          | 107 | 6   | 0   | 17       | 1                   | 79     | 4                | 0     | 1          |
| <i>Salmo trutta</i>    | 91  | 5   | 9   | 46       | 7                   | 4      | 15               | 9     | 13         |
| <i>O. keta</i>         | 79  | 4   | 1   | 10       | 10                  | 43     | 13               | 8     | 9          |
| <i>O. gorbuscha</i>    | 73  | 4   | 3   | 11       | 5                   | 41     | 17               | 10    | 5          |
| <i>O. clarkii</i>      | 55  | 3   | 2   | 25       | 1                   | 0      | 4                | 4     | 17         |
| <i>Sal. fontinalis</i> | 38  | 2   | 3   | 31       | 0                   | 0      | 1                | 1     | 3          |
| <i>Sal confluentus</i> | 22  | 1   | 2   | 9        | 1                   | 0      | 1                | 2     | 4          |
| <i>Sal malma</i>       | 8   | <1  | 0   | 4        | 2                   | 1      | 3                | 2     | 2          |
| <i>O. masou</i>        | 8   | <1  | 2   | 4        | 1                   | 0      | 0                | 1     | 1          |

Figure S1 Panel plots for each life stage and label, showing the number and percent of papers in each label.

**Caption:** These more detailed barcharts show the relative frequency of each label within all categories for each life stage. The y-axis shows the proportion of all papers within the life stage that fell in each bin, and the absolute number of papers in each bin are shown above each column.

# Egg

Percent of papers in this life stage

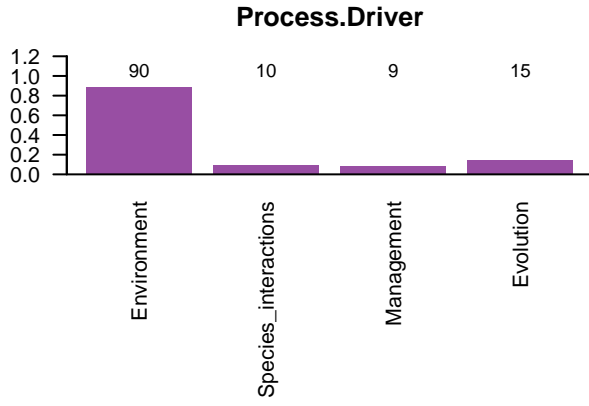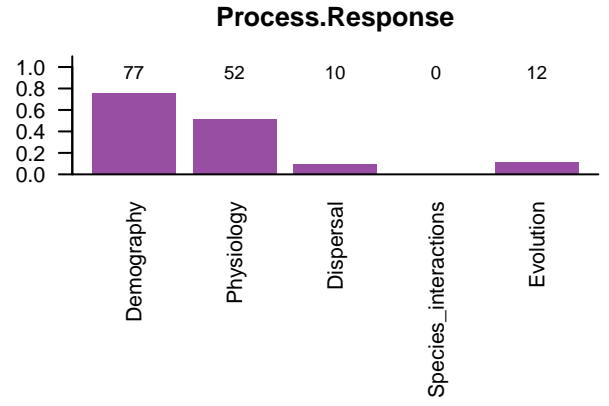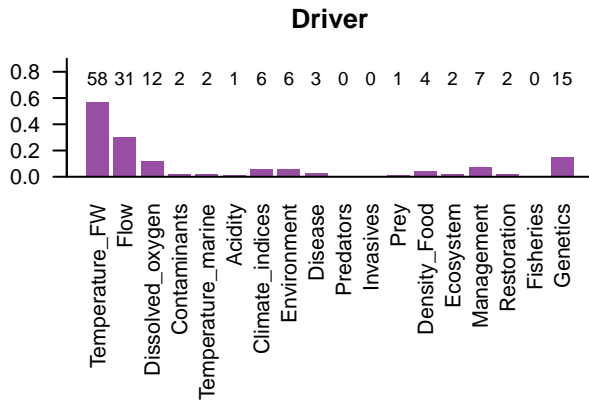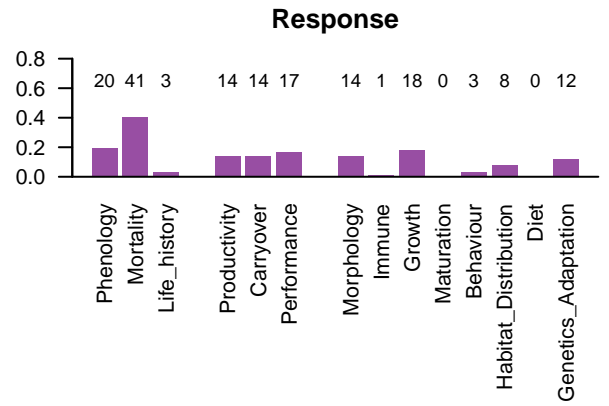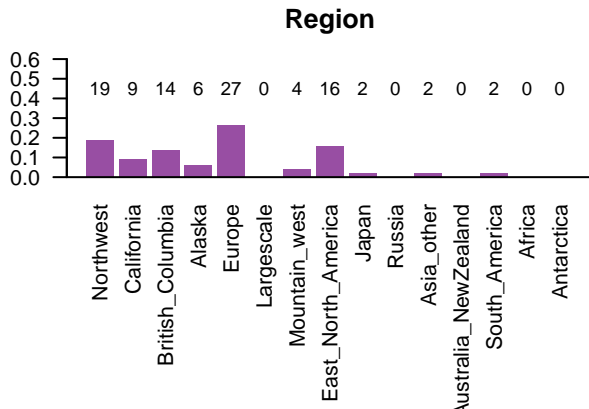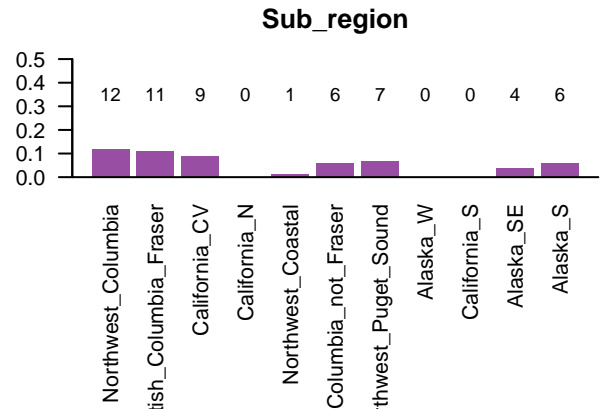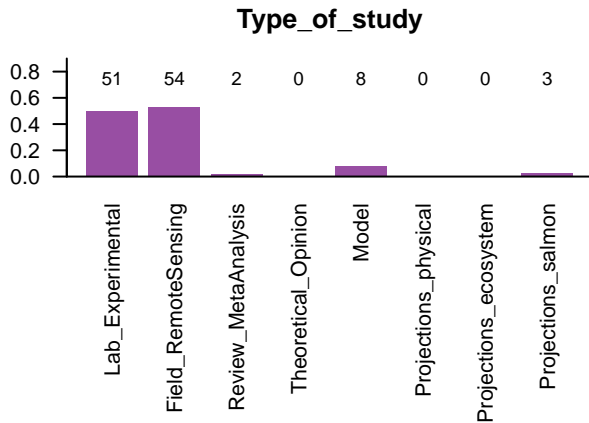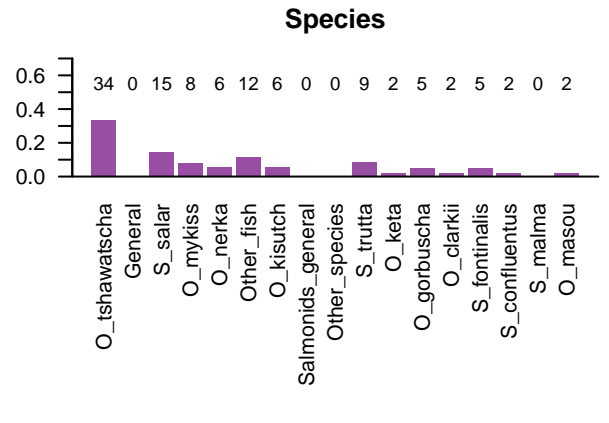

Label

# Juvenile

Percent of papers in this life stage

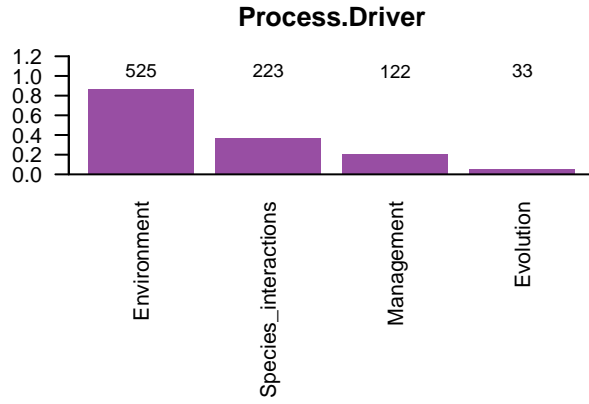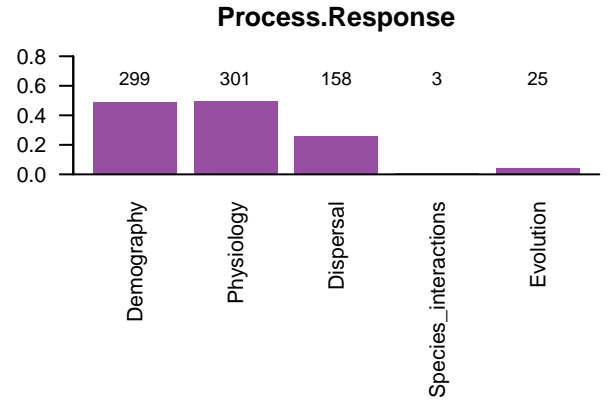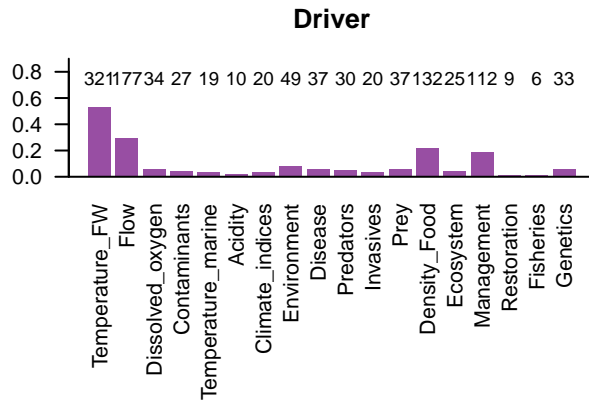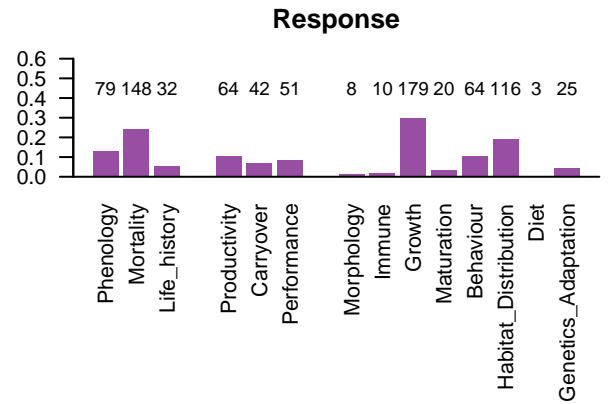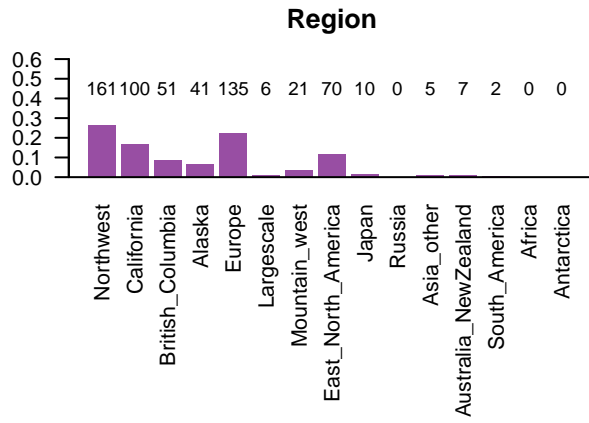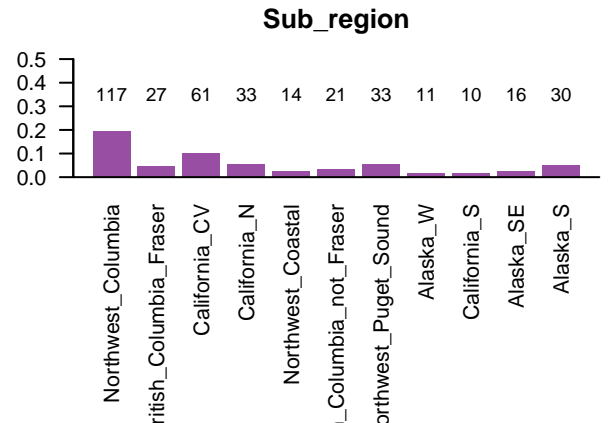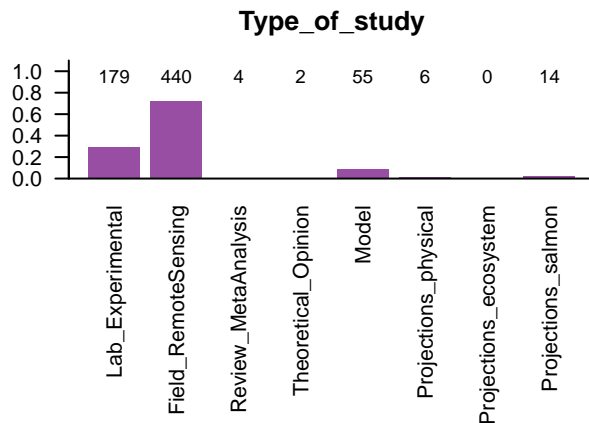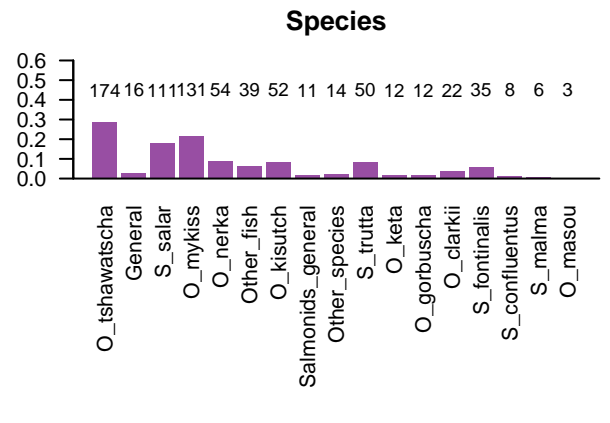

Label

# Outmigration

Percent of papers in this life stage

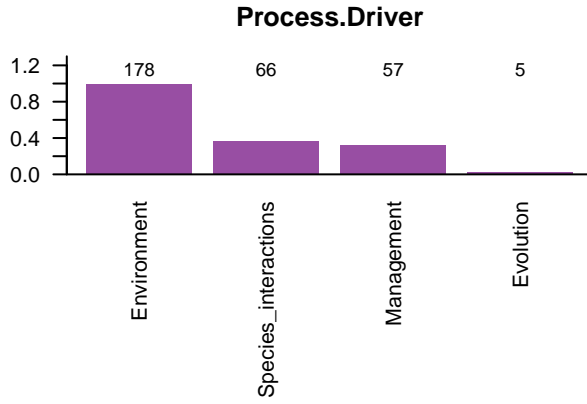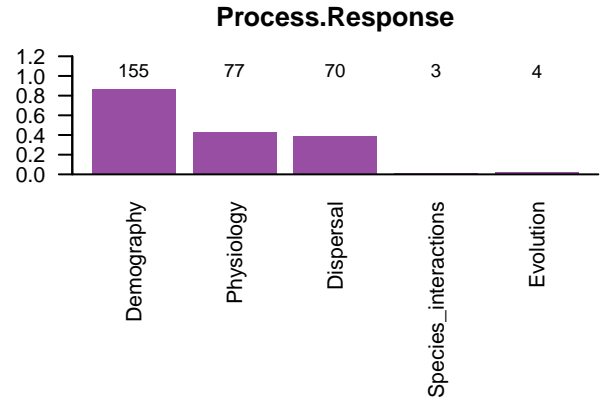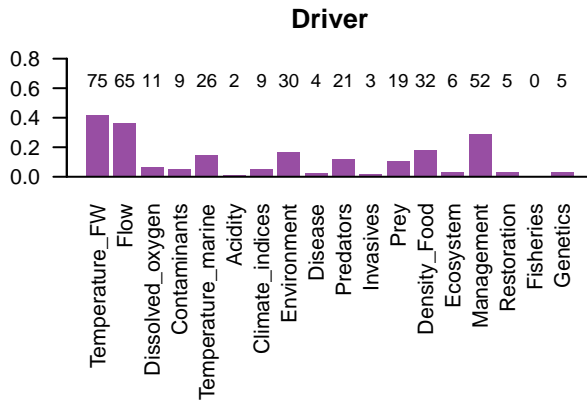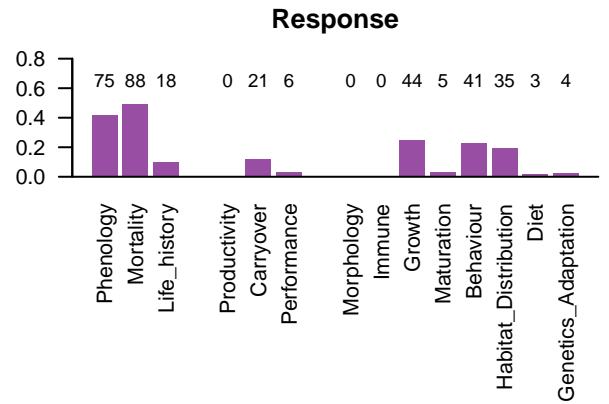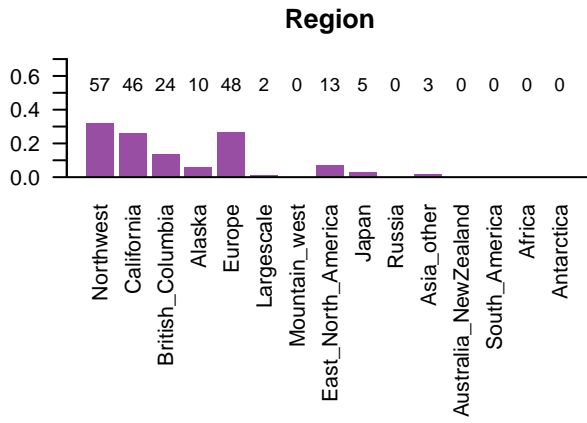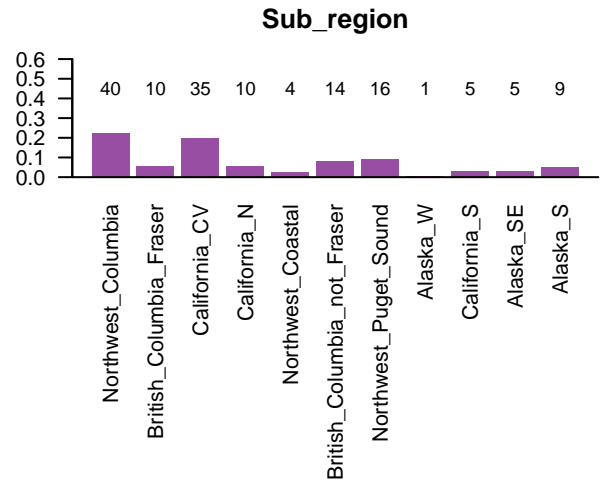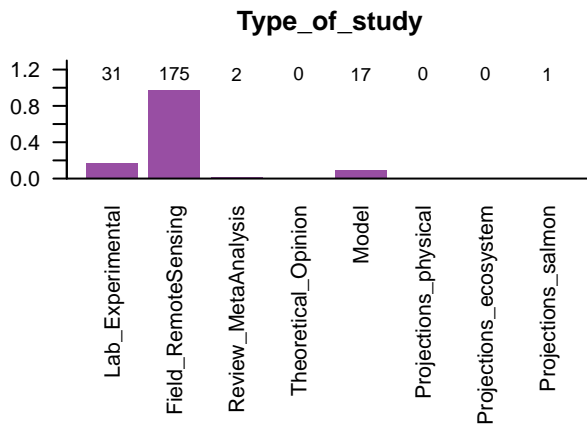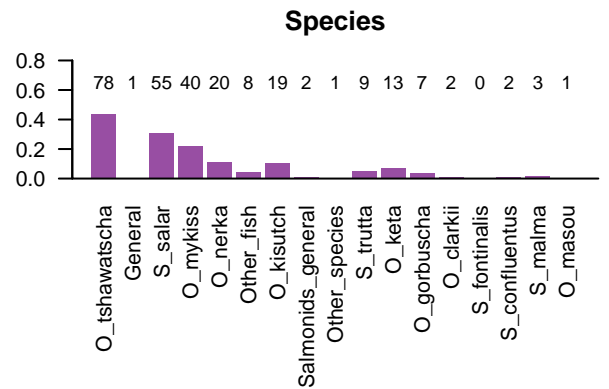

Label

# Marine

Percent of papers in this life stage

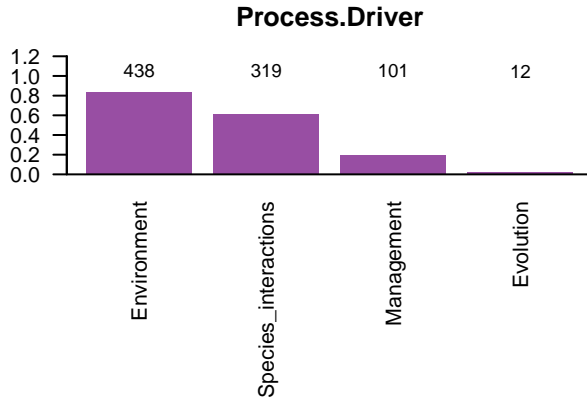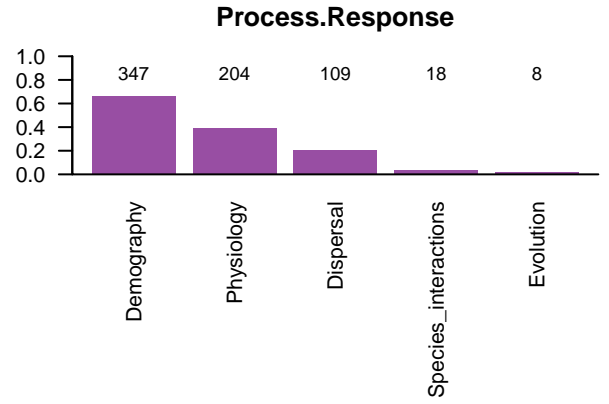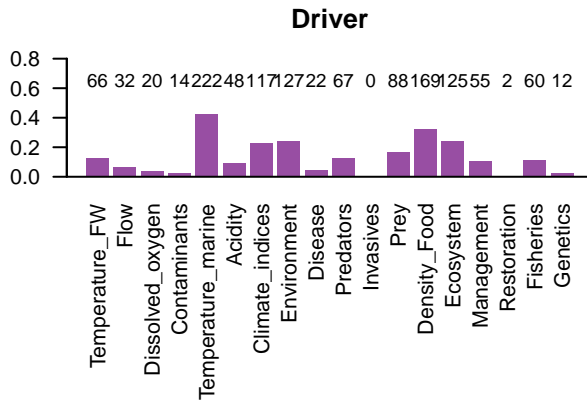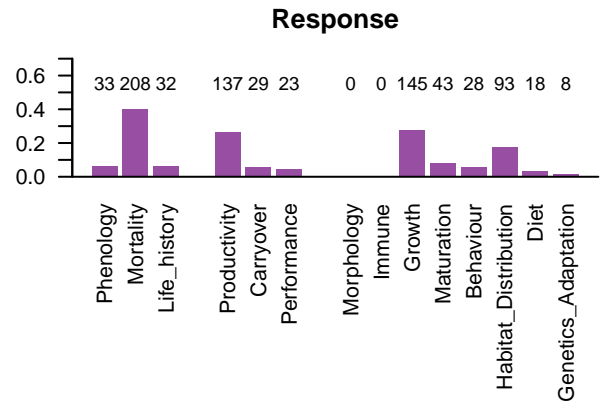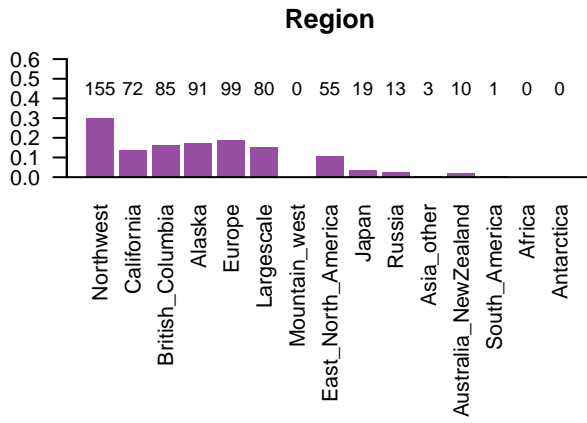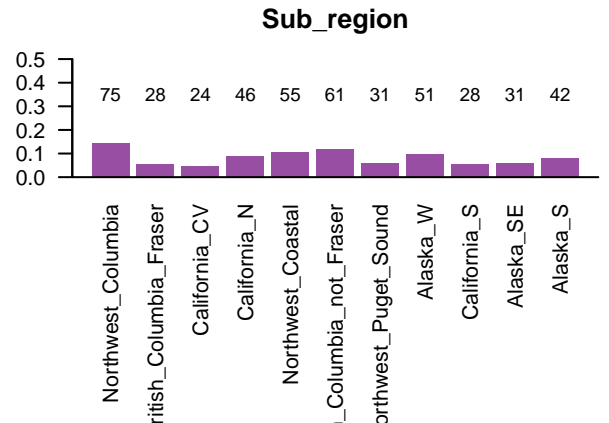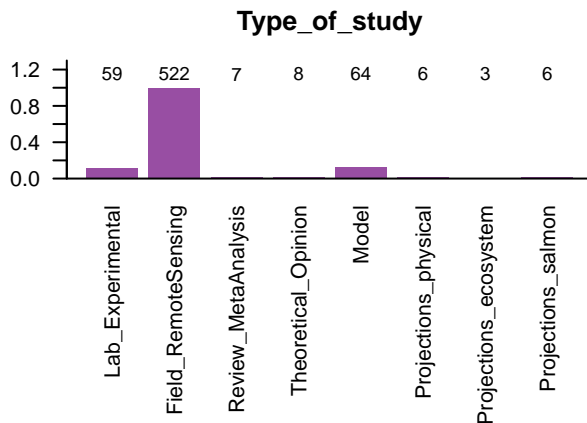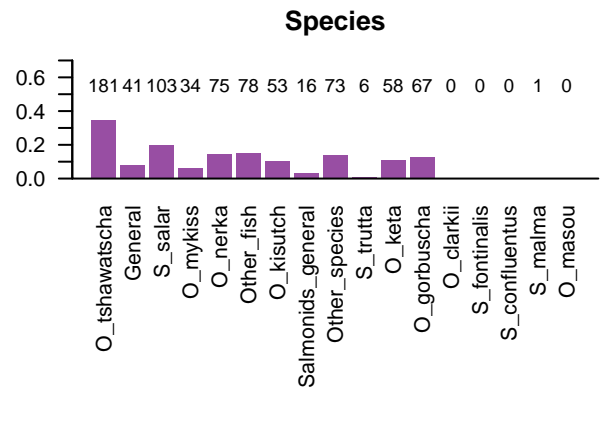

Label

# Upmigration

Percent of papers in this life stage

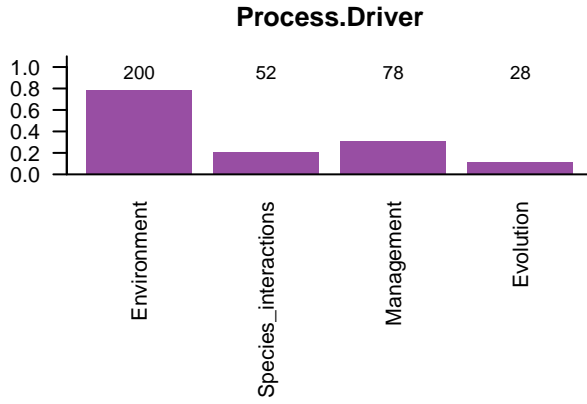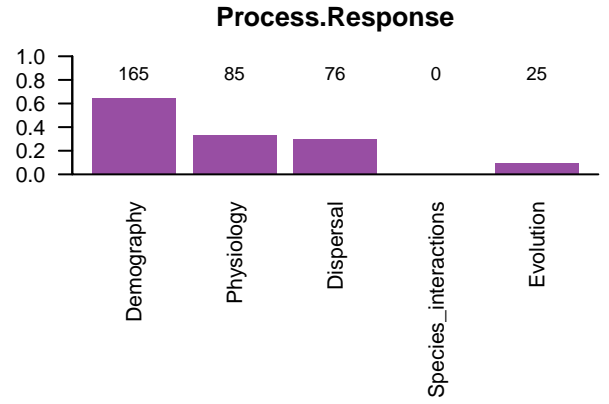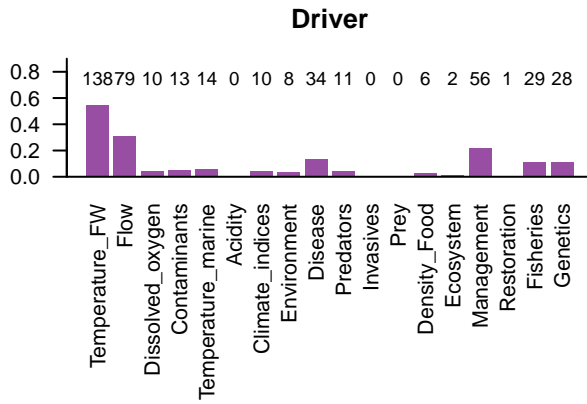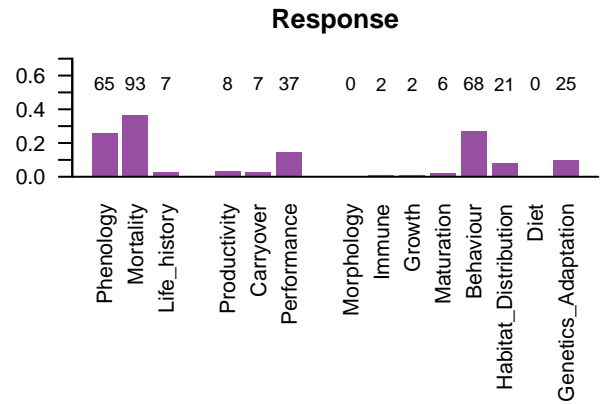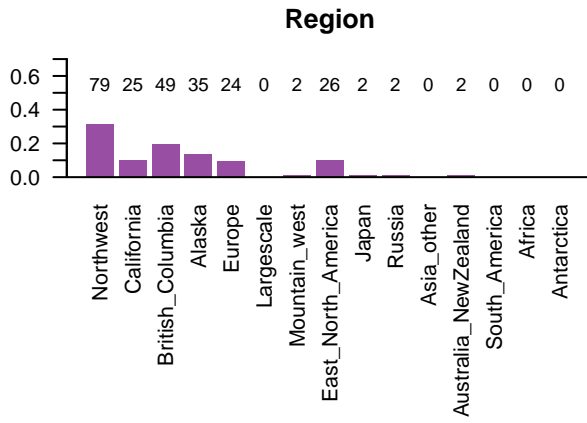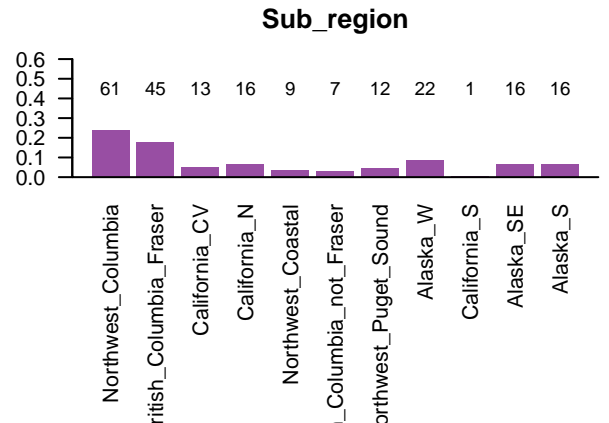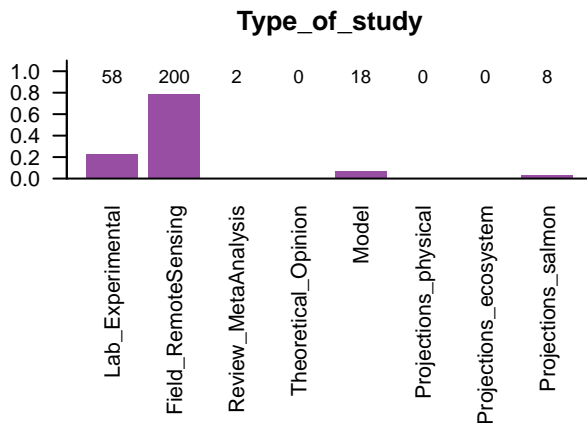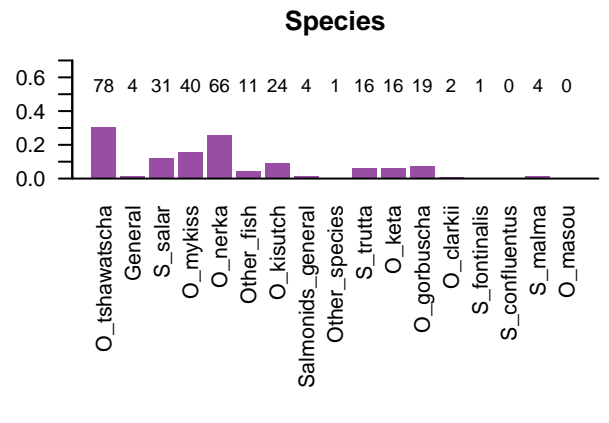

Label

# Spawning

Percent of papers in this life stage

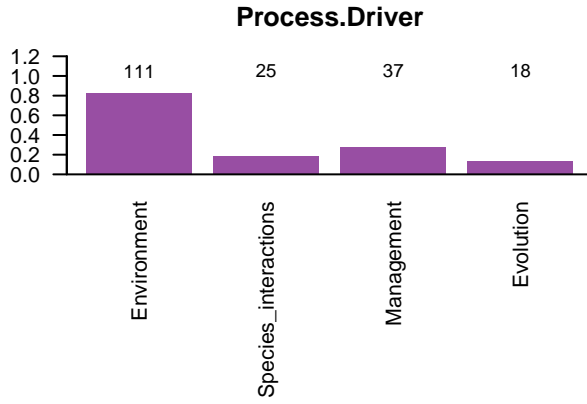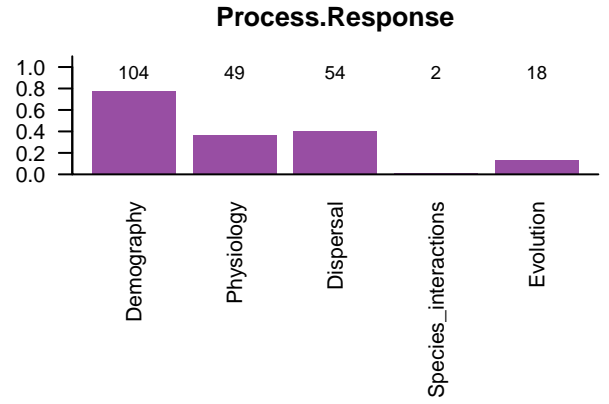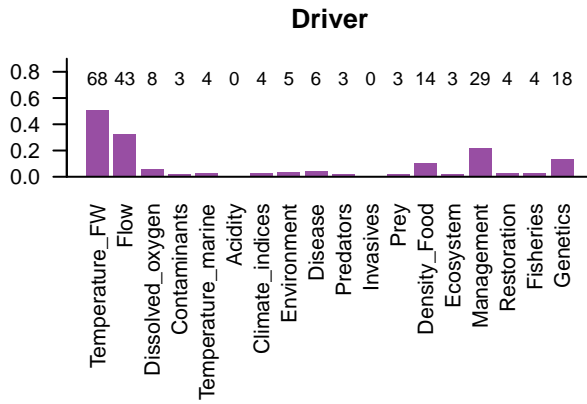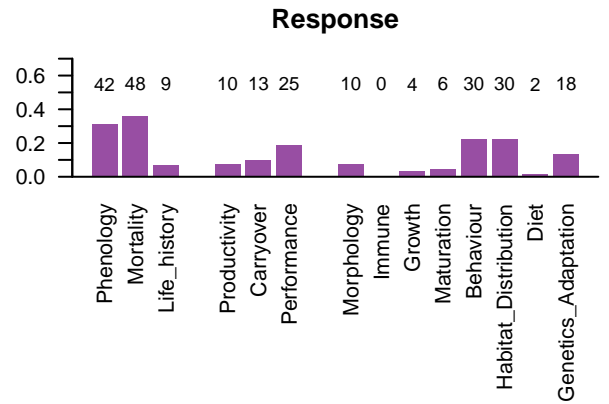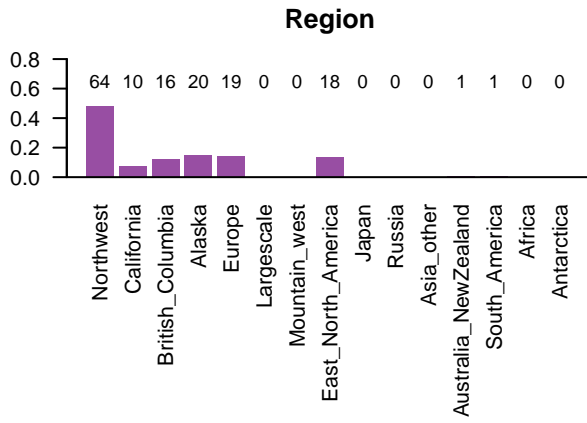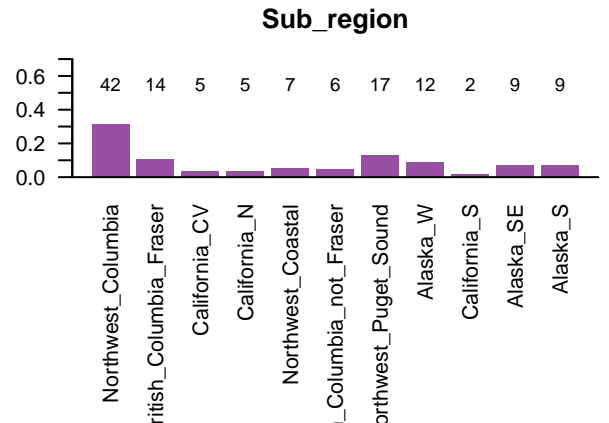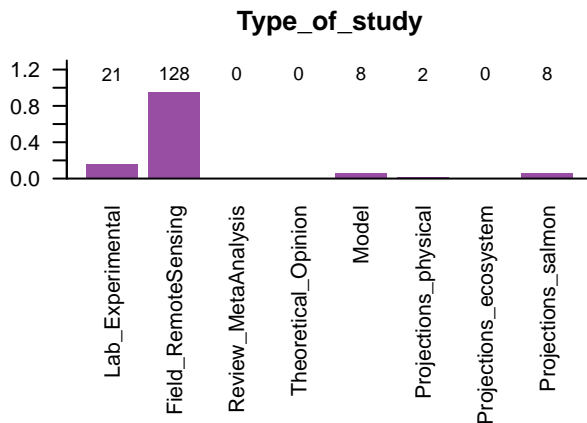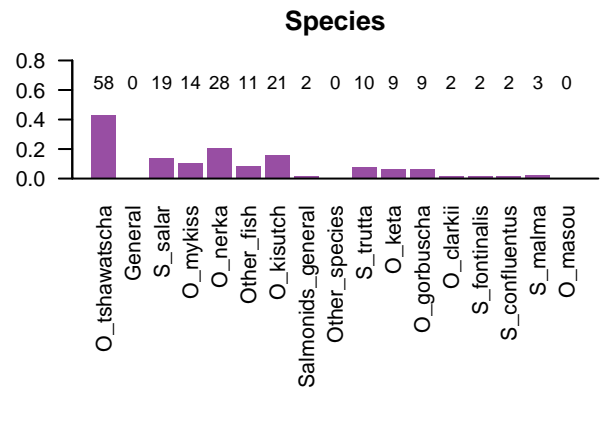

Label

# Population

Percent of papers in this life stage

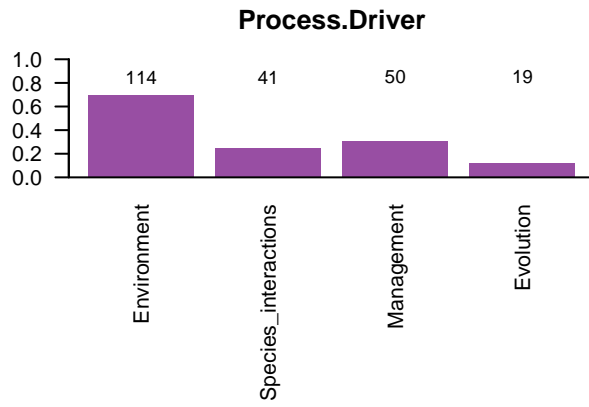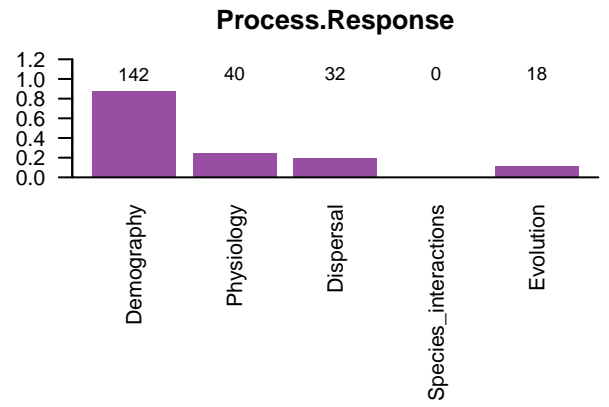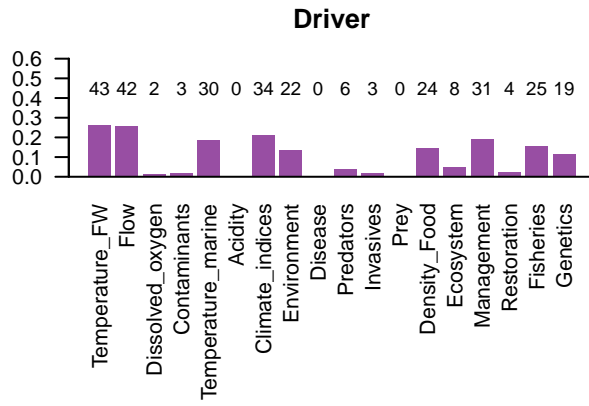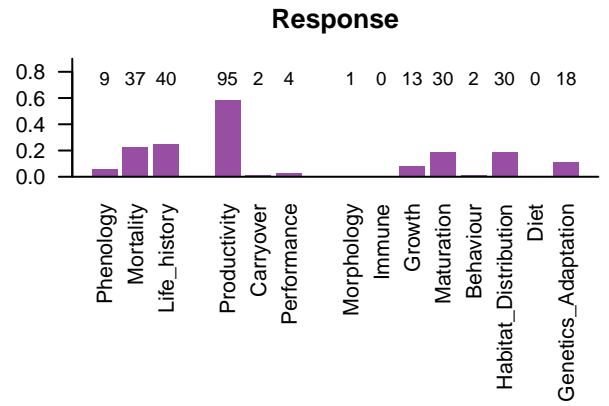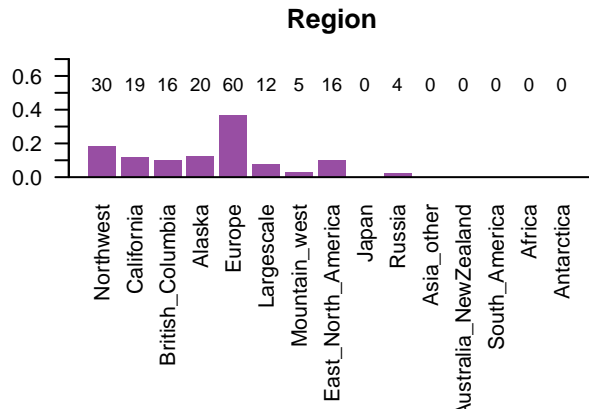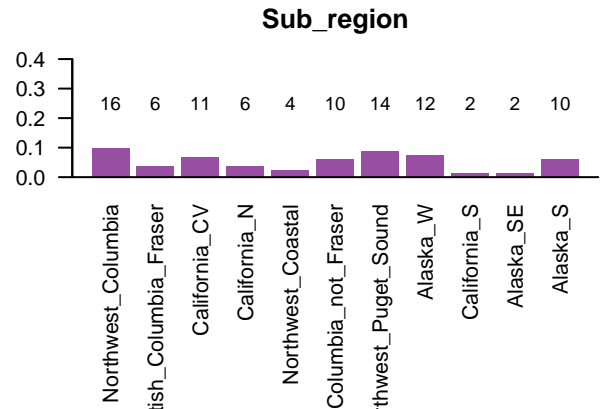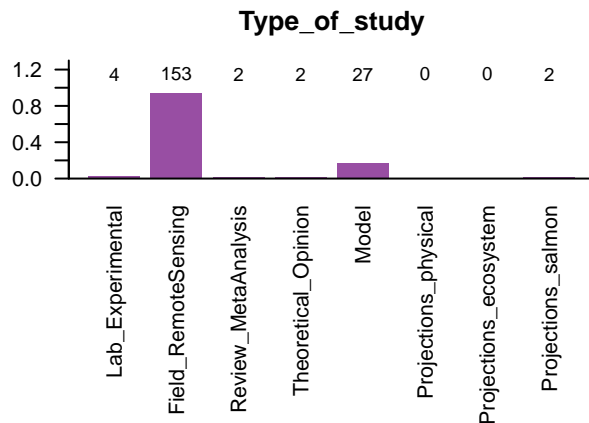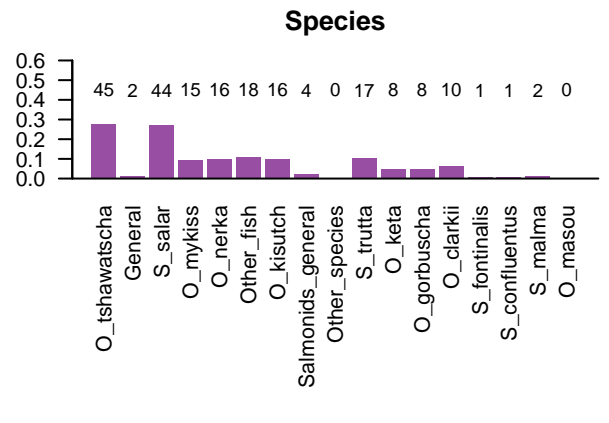

Label
